# Supplementary material for: Principles of mRNA targeting via the Arabidopsis m6A-binding protein ECT2
Source: PubMed Central journal article supplement (PMC8796052; doi:10.7554/elife.72375), 2021-09-30
Supplement: elife-72375-fig5-figsupp4-data1.pdf [file elife-72375-fig5-figsupp4-data1.pdf]

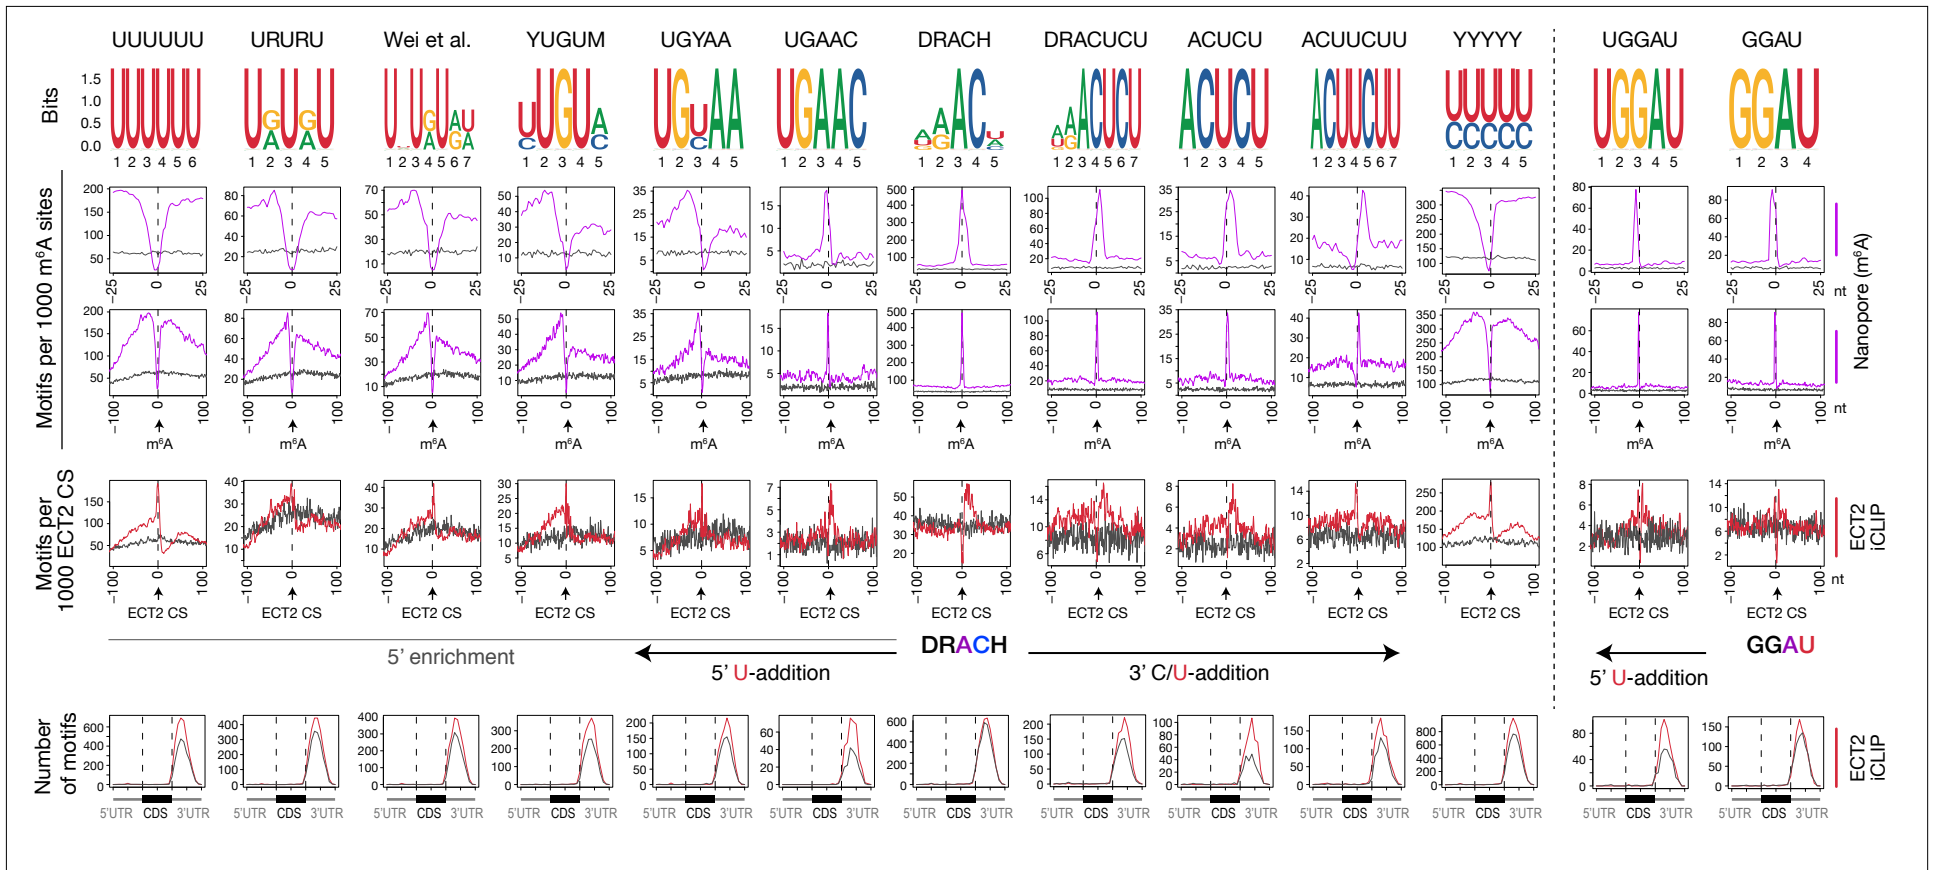

**Figure 5—figure supplement 4. Uridines flanking DRACH result in additional motifs enriched at ECT2 iCLIP sites.** Enrichment of DRACH-like motifs containing additive amounts of U(Y)s at the flanks until there is only U/Ys. Through the upstream U-additions, transition forms like URURU/UGUAY/YUGUM are included. GGAAU with addition of one U upstream is also shown on the right side of the figure. From top panel to bottom: (1) motif logos for derived position weight matrices (PWMs); (2-4) distribution of the relevant motif relative to m<sup>6</sup>A-Nanopore (Parker et al., 2020) (2,3) or ECT2-iCLIP crosslink sites (CS) (4). Grey lines represent the distribution for gene-body location-matched background set of sites of equivalent number; (5) total number of the relevant motif found at ECT2-iCLIP sites according to gene body location. Grey lines indicate numbers found in the same gene-body location-matched background set.
