# Supplementary material for: Principles of mRNA targeting via the Arabidopsis m6A-binding protein ECT2
Source: PubMed Central journal article supplement (PMC8796052; doi:10.7554/elife.72375), 2021-09-30
Supplement: elife-72375-fig7-figsupp1-data1.pdf [file elife-72375-fig7-figsupp1-data1.pdf]

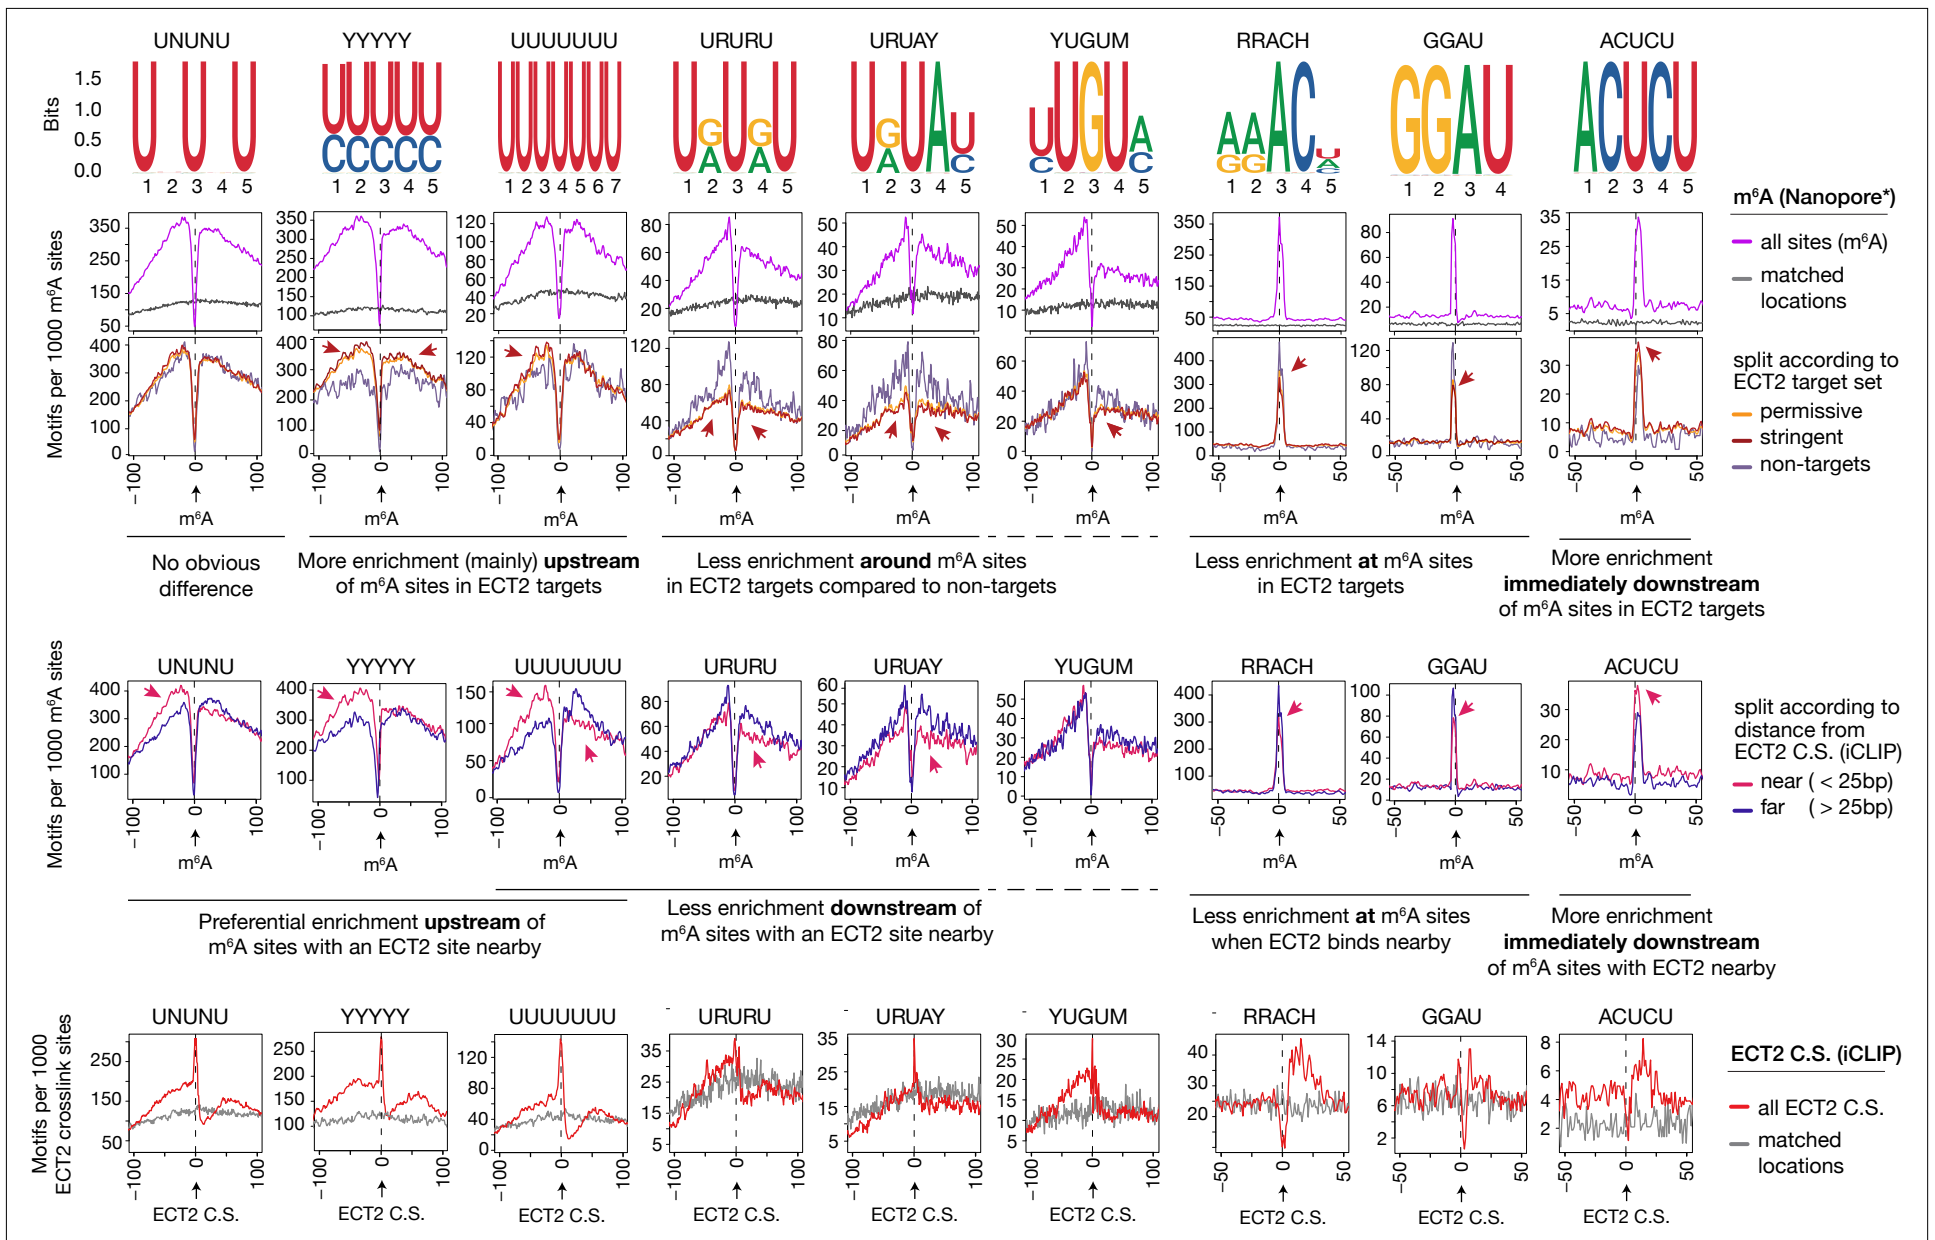

**Figure 7—figure supplement 1. Motif preferences around m<sup>6</sup>A sites according to ECT2 binding.** From top to bottom: (1) motif logos for derived position weight matrices (PWMs); (2) distance-based enrichment of motifs at and around m<sup>6</sup>A-Nanopore\* sites, plotted as motif counts per 1000 m<sup>6</sup>A sites (purple lines). Grey lines indicate the enrichment in a location-matched background set as in Figure 5D; (3) same as in 2 with sites split according to whether they sit on ECT2 targets; (4) same as in 2 with sites split according to the distance from the nearest ECT2 crosslink site (for ECT2-iCLIP targets only); (5) motif counts per 1000 iCLIP binding sites, as a function of distance from the iCLIP position, showing all sites against matched background sites (grey lines). Motifs are ordered according to the different relative enrichment upstream or downstream m<sup>6</sup>A sites according to ECT2 binding (see text below panels 3 and 4). \* Parker et al. (2020).
