# Supplementary material for: Principles of mRNA targeting via the Arabidopsis m6A-binding protein ECT2
Source: eLife journal article supplement (doi:10.7554/elife.72375), 2021-09-30
Supplement: fig1-figsupp1-data1 [file elife-72375-fig1-figsupp1-data1-v2.zip]

Figure 1—figure supplement 1—SourceData1

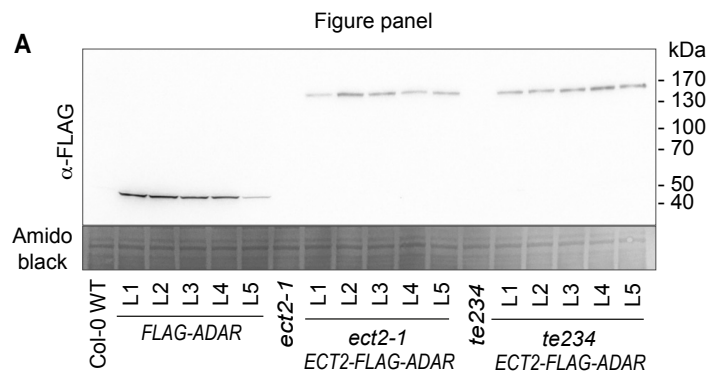

Notice that the loading order has been mirrored left-to-right to restore the original loading order (with the WT control first) that becomes mirrored during the blotting procedure°

Dotted outlines indicate the cropping applied to the figure

Enhanced Chemiluminescence signal (α-FLAG antibody)

Source Data 2

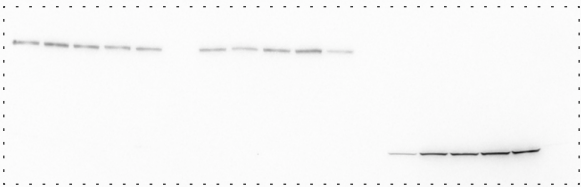

L5 L4 L3 L2 L1 *te234* L5 L4 L3 L2 L1 *ect2-1* L5 L4 L3 L2 L1

*te234* *ect2-1* FLAG-ADAR

ECT2-FLAG-ADAR ECT2-FLAG-ADAR Col-0 WT

Bright field

Source Data 3

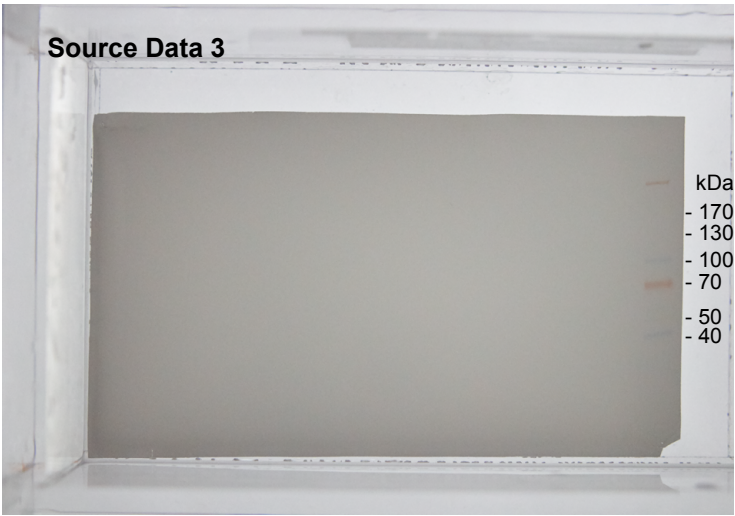

Amido black

Source Data 4

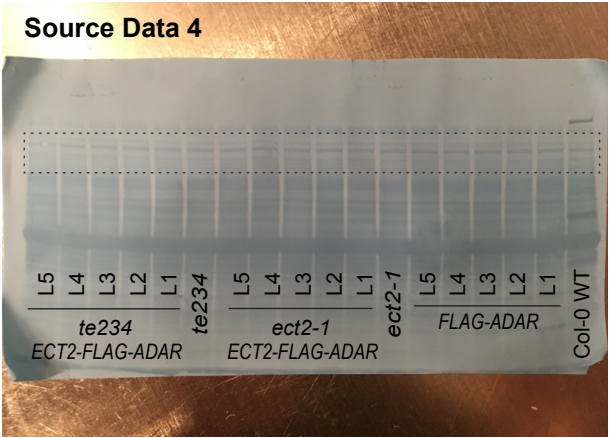

L5 L4 L3 L2 L1 *te234* L5 L4 L3 L2 L1 *ect2-1* L5 L4 L3 L2 L1

*te234* *ect2-1* FLAG-ADAR

ECT2-FLAG-ADAR ECT2-FLAG-ADAR Col-0 WT
