# Supplementary material for: Principles of mRNA targeting via the Arabidopsis m6A-binding protein ECT2
Source: eLife journal article supplement (doi:10.7554/elife.72375), 2021-09-30

Figure 3—Figure supplement 1—SourceData1

Dotted outlines indicate the cropping applied to the figure

Figure Panels

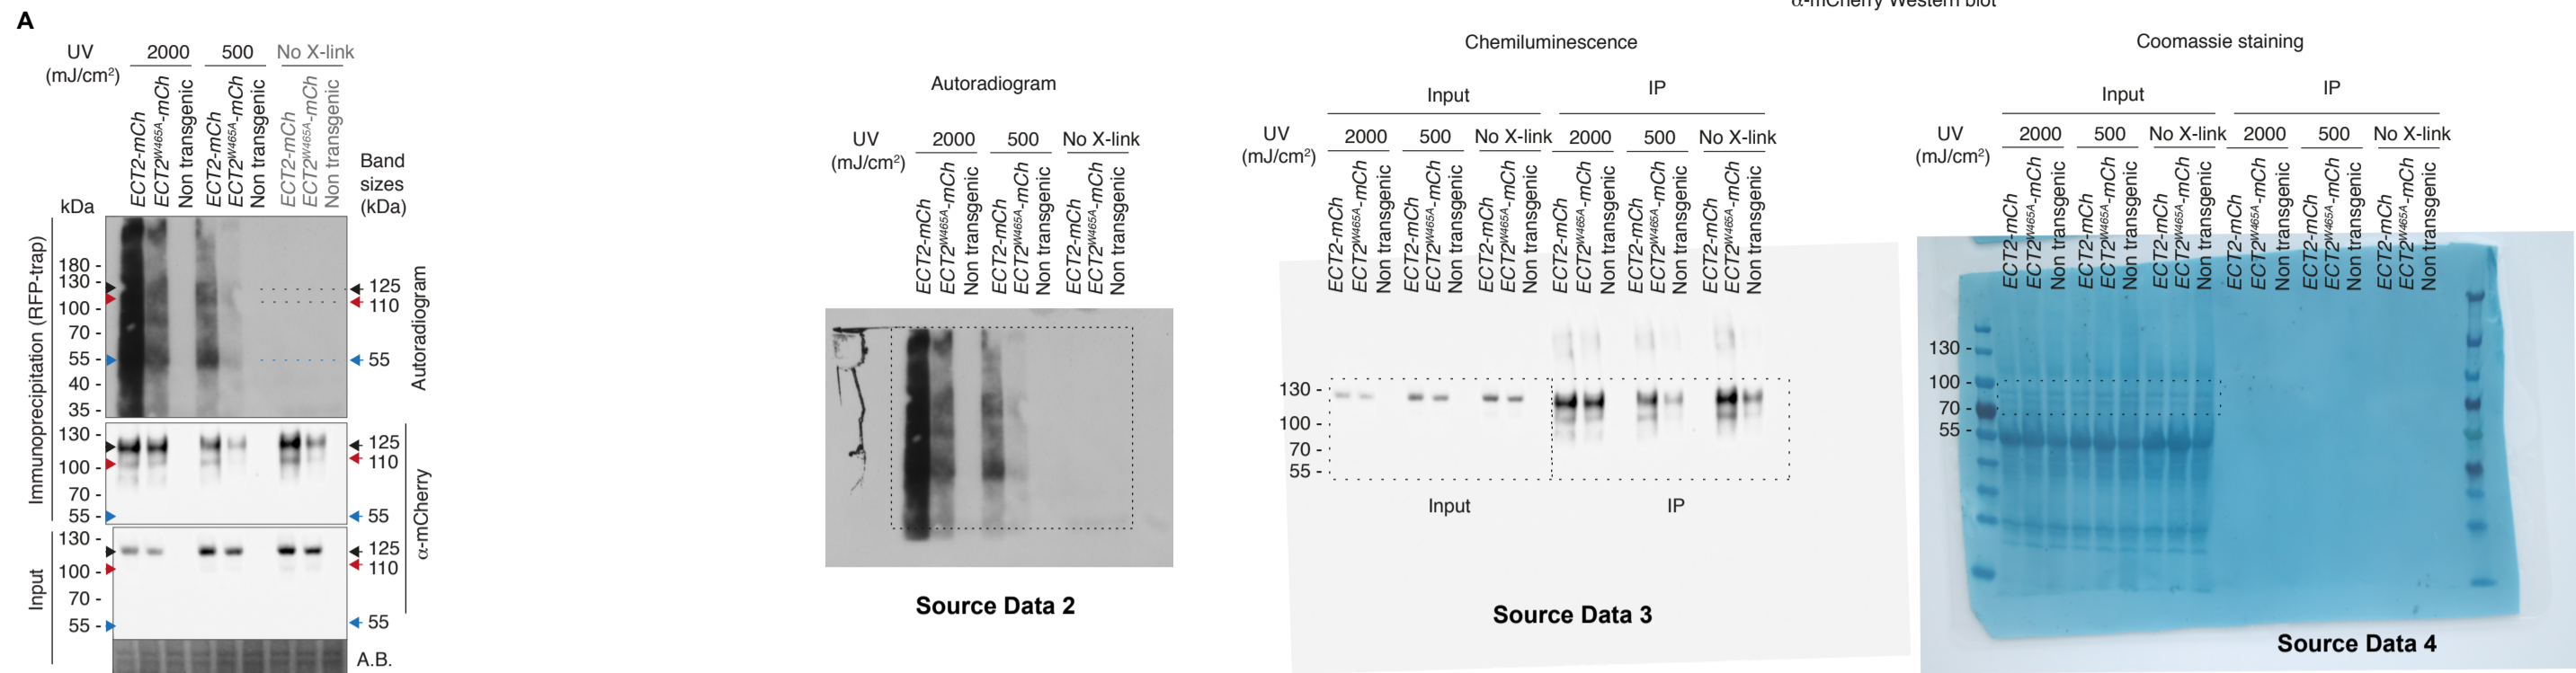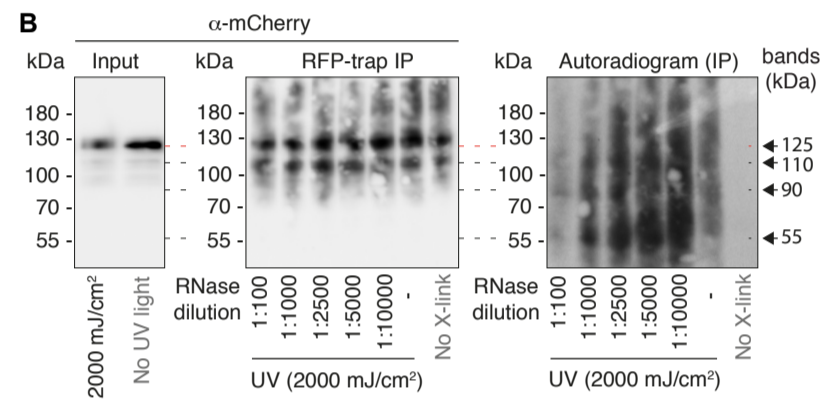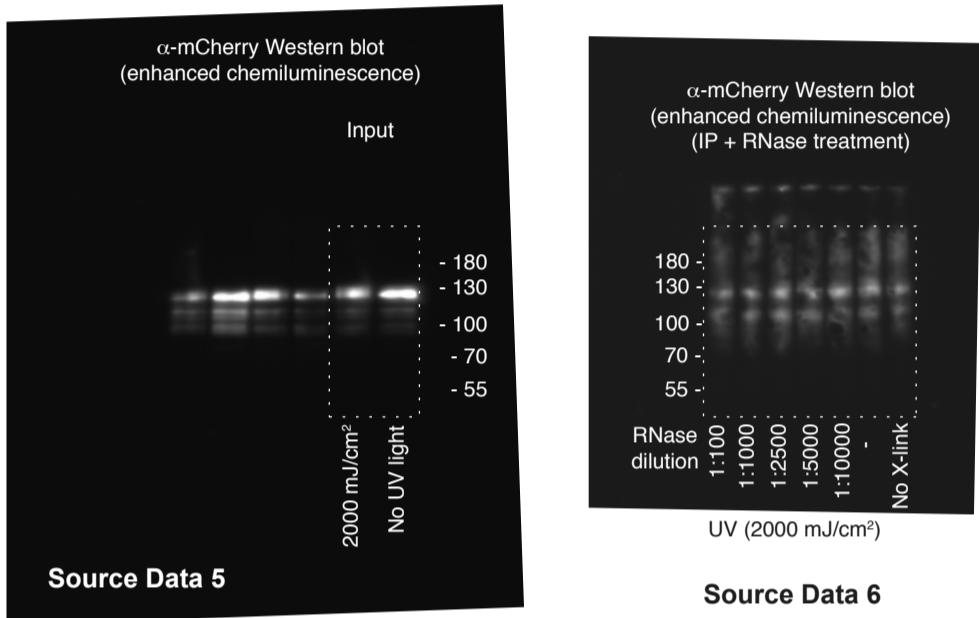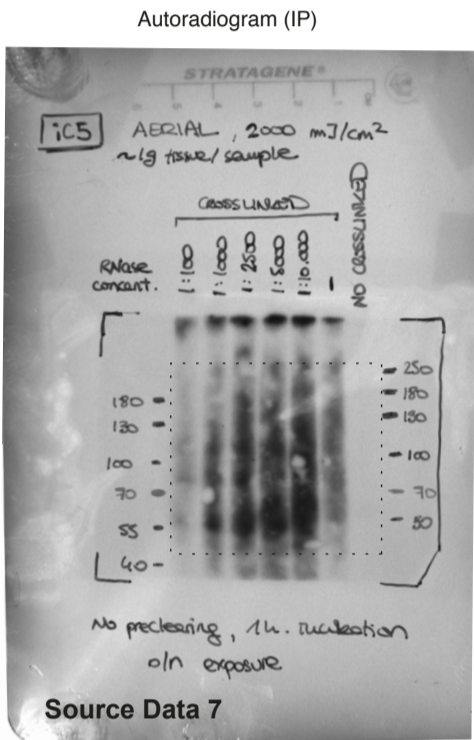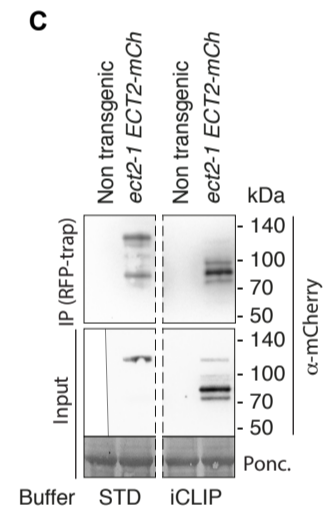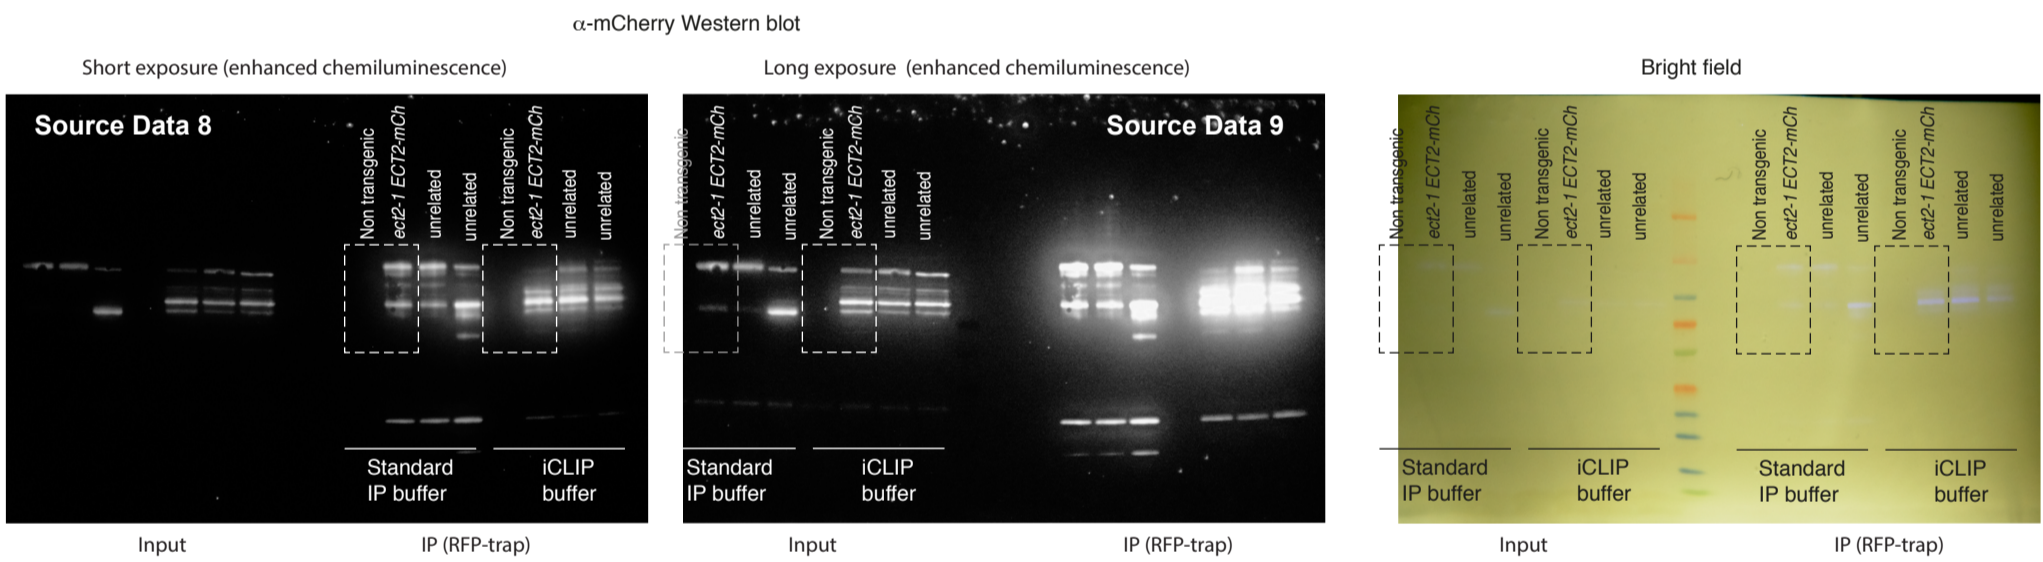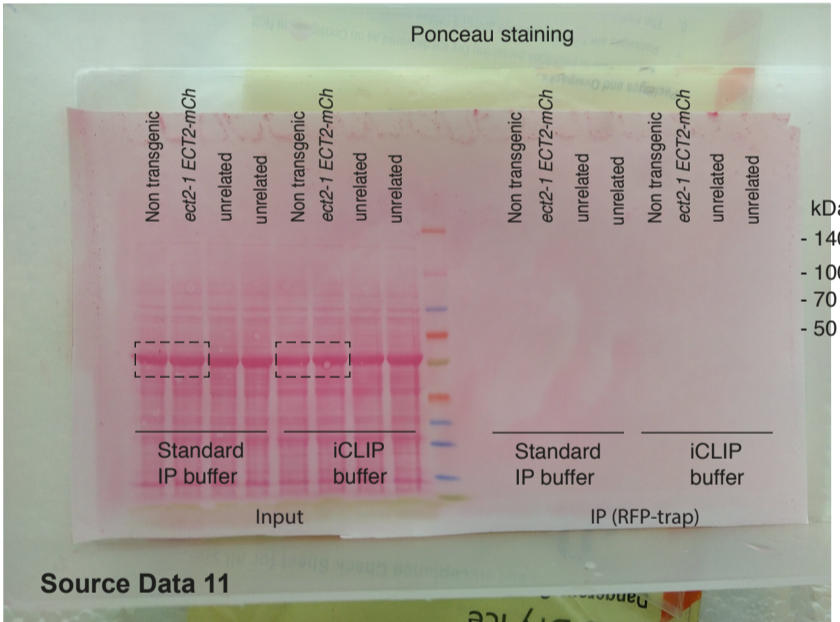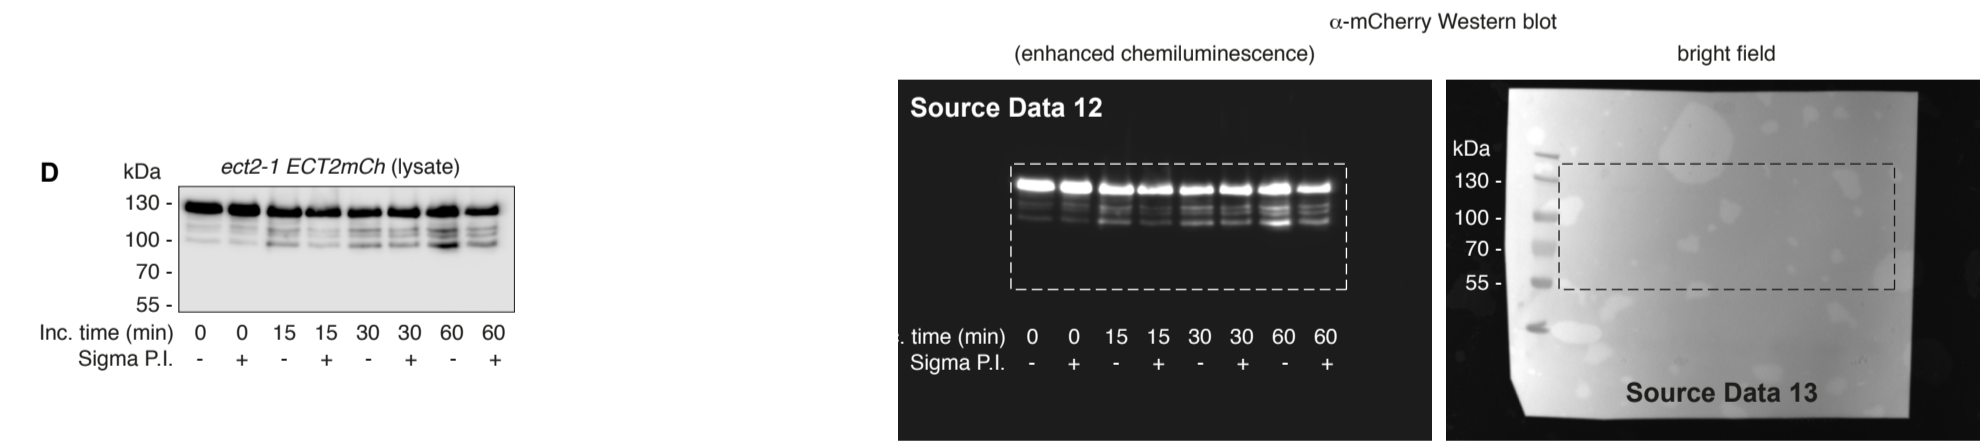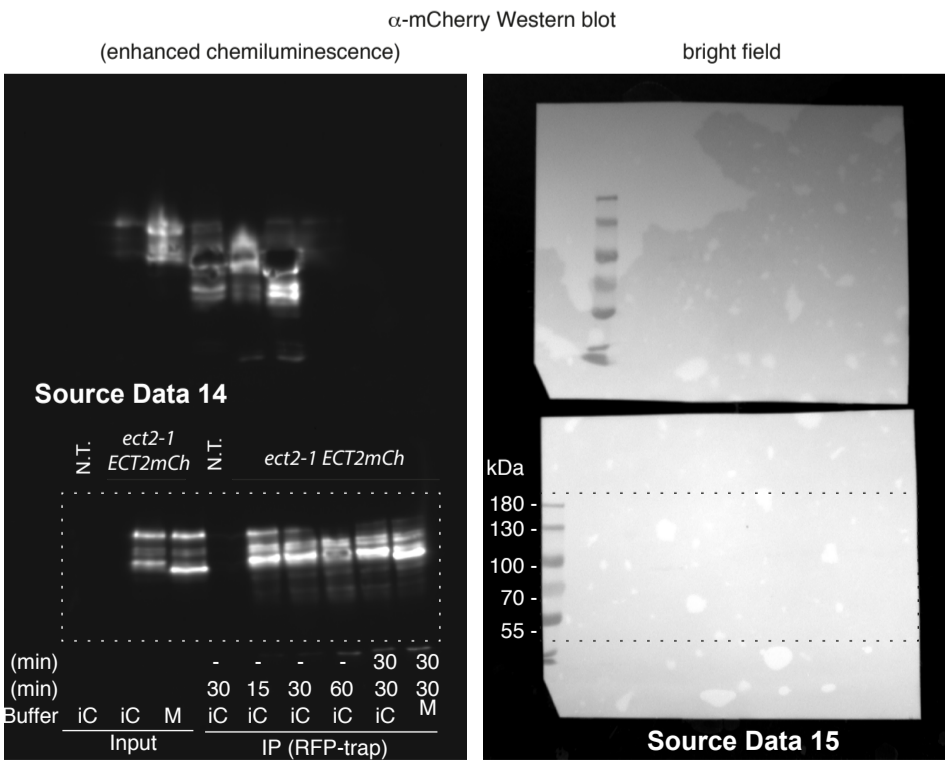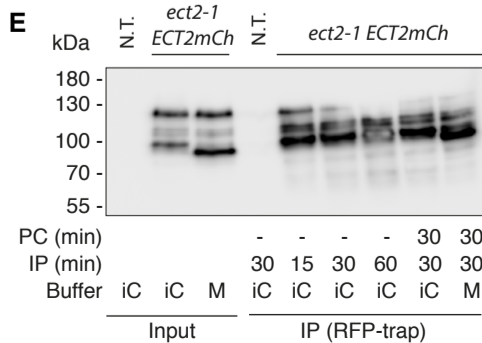

Supplement: fig3-figsupp1-data1 [file ECT2-Targeting_v2_Figure3-Figure_supplement1-Source_data1.pdf › ECT2-Targeting_v2_Figure3-Figure_supplement1-Source_data1.pdf]
