# Supplementary material for: Principles of mRNA targeting via the Arabidopsis m6A-binding protein ECT2
Source: eLife journal article supplement (doi:10.7554/elife.72375), 2021-09-30
Supplement: fig3-figsupp3-data1 [file elife-72375-fig3-figsupp3-data1-v2.zip]

Figure 3—Figure supplement 3—SourceData1

Dotted outlines indicate the cropping applied to the figure

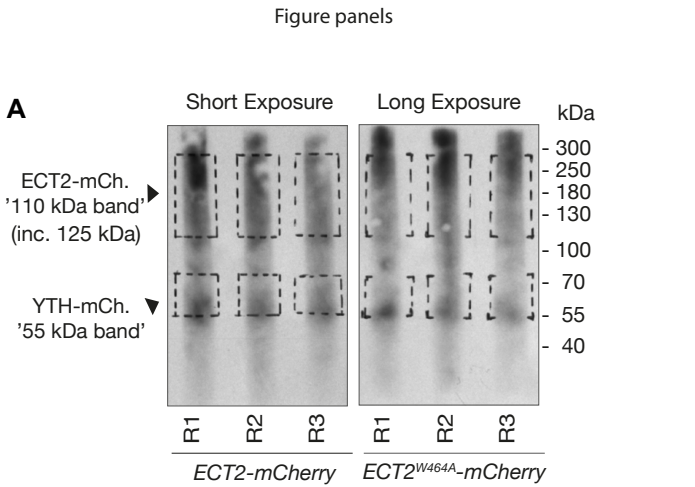

Source Data 2

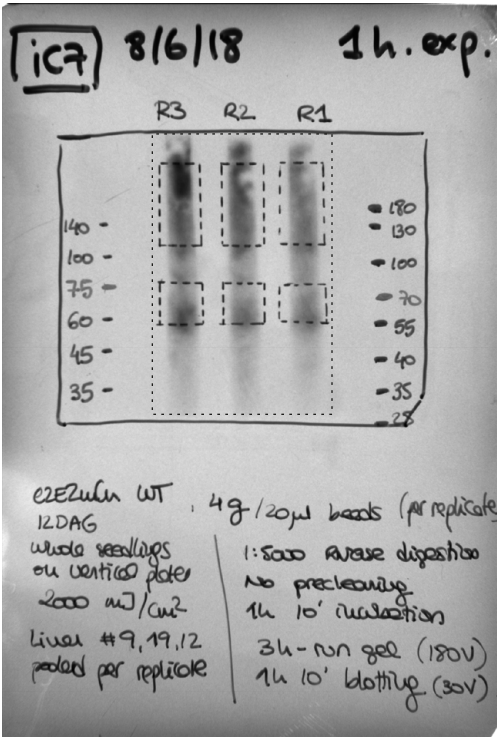

Autoradiograms

Source Data 3

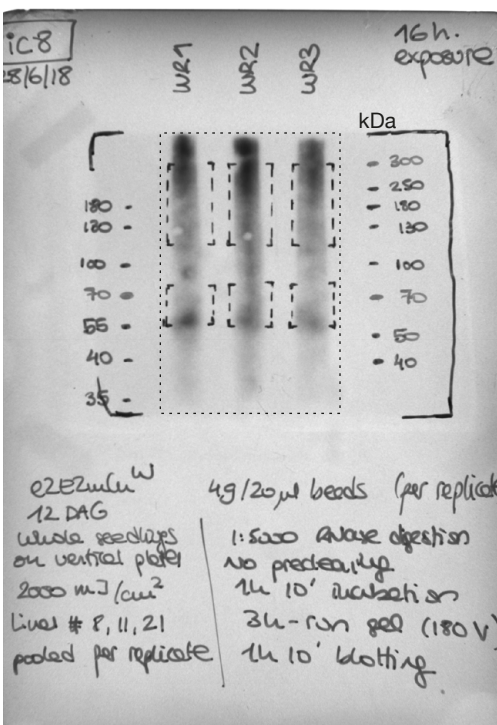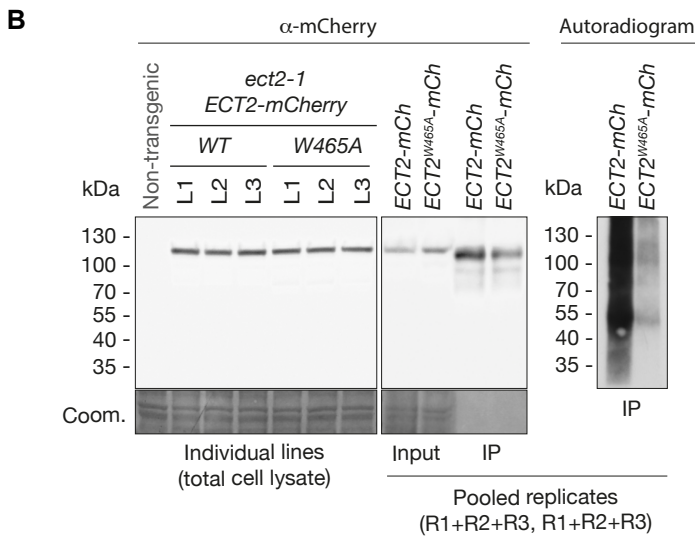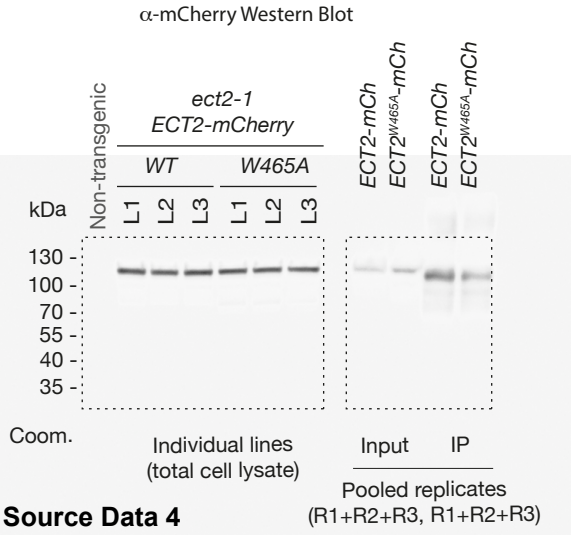

Autoradiogram

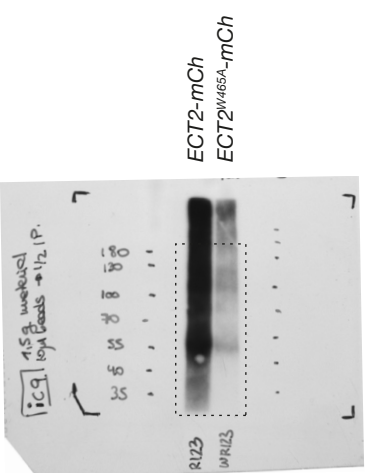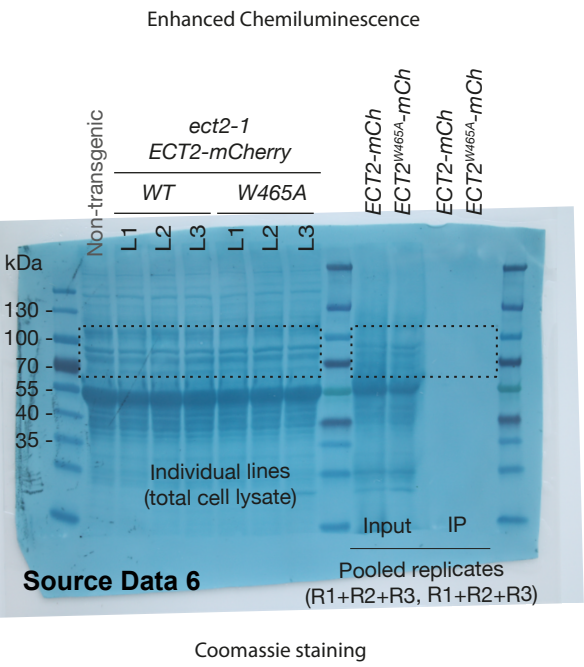

Coomassie staining

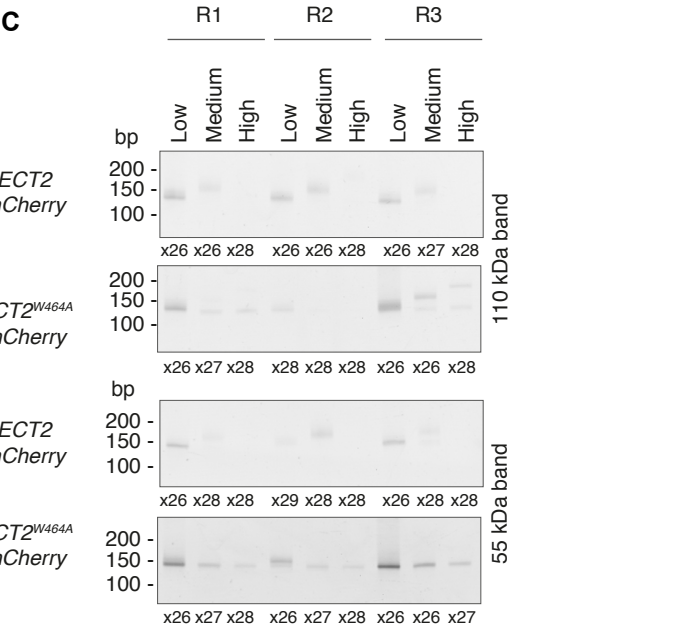

Ethidium bromide staining

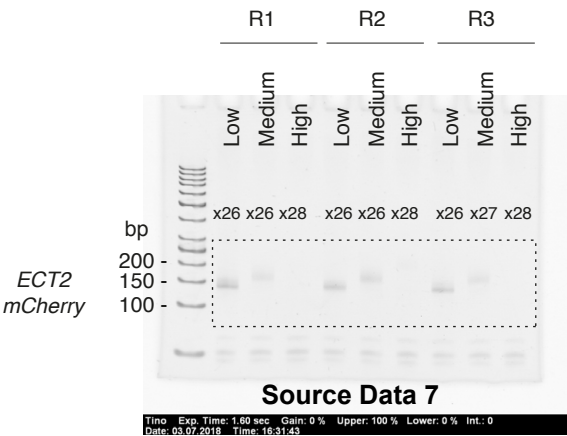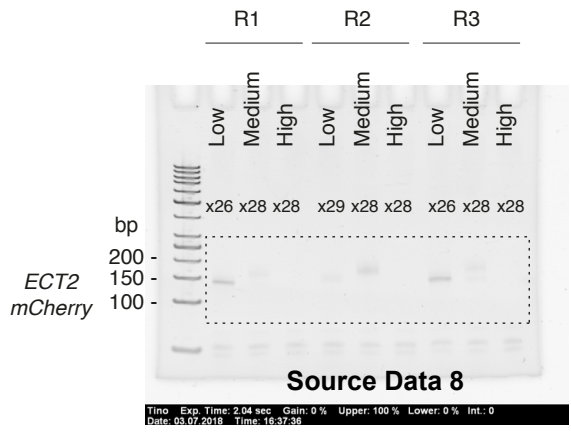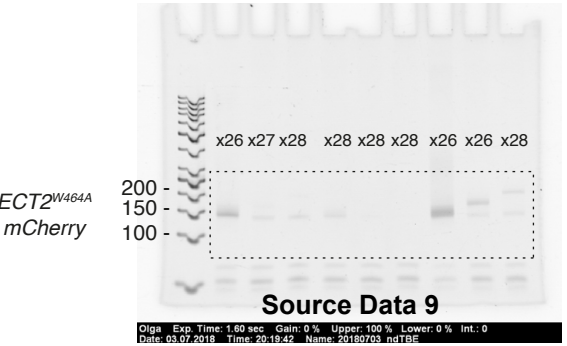

110 kDa band

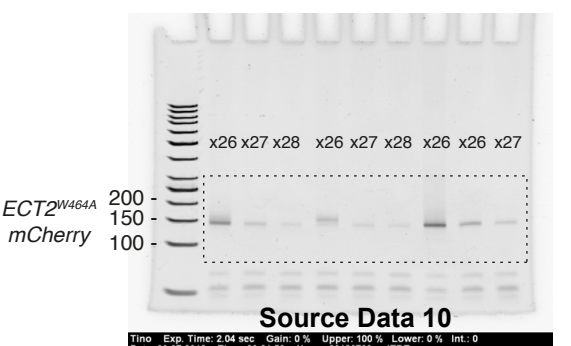

55 kDa band
