# Supplementary material for: Principles of mRNA targeting via the Arabidopsis m6A-binding protein ECT2
Source: eLife. 2021 Sep 30;10:e72375. doi: 10.7554/eLife.72375 (PMC8796052; doi:10.7554/eLife.72375)
Supplement: Supplementary file 1. [file elife-72375-supp1.xlsx]

## Sheet: INFO
Supplementary File 1
ECT2 HyperTRIBE data from manually dissected root tips and apexes (aerial tissue) of 10-day-old seedlings grown on vertical plates in long days
Sheet type	Description
HITS	All significantly edited sites (padj<0.01, log2FoldChange(ECT2-ADAR/ADAR)>1) constrained to A->G (+strand) or T->C (-strand) mismatches, and with at least 10 reads covering the edited site over the 5 fusion samples
GENES	All genes containing significantly edited sites as described above
HITS
Column headers	Description
ID	Chromosome position of each edited sites
GENE	AGI (Araport11)
TRANSCRIPTS	Ordered by expression
NAME	Gene name
STRAND	DNA strand, based on annotated gene with highest expression in case of ambiguity (see Note 1 below)
REF	Reference nucleotide (un-fused ADAR control samples)
TARG	Mismatched nucleotide (ECT2-ADAR fusion samples)
PROP	Editing proportion based on raw reads
COUNT	Raw number of reads covering the position with edited nucleotides (see Note 2 below)
log2FC	Modelled fold change (ECT2-ADAR vs. ADAR control) in editing
p-adj	Adjusted p-value from the model
GENES
Column headers	Description
GENE	AGI (Araport11)
NAME	Gene name
STRAND	DNA strand, based on annotated gene with highest expression in case of ambiguity (see Note 1 below)
TRANSCRIPTS	Ordered by expression
TPM	Expression estimates for each transcript (in the same order as in the preceding TRANSCRIPTS column) in transcripts per million, according to Salmon quantification, averaged over the 5 control samples (free ADAR) in either roots or aerial tissues
HITS	Number of positions (edited sites) per gene
IDs	Chromosome positions of edited sites
p-adj	False Discovery Rate (ordered by lowest to highest, within and across genes)
PROP	Editing proportions based on raw reads
log2FC	Modelled log2 fold change (ECT2-ADAR vs. ADAR control) in editing. Individual positions were filtered s.t. log2FC>1 +ve fold change implies the edit is preferential to the ECT2-ADAR fusion (desired outcome) -ve fold change implies that the edit is preferential to the control (free ADAR)
MISMATCH_TYPE	Restricted to A->G (+ve strand) and T->C (-ve strand)
Additional notes:
1. The RNA-seq data is unstranded and the results are stranded by annotation. This means that an A-G edit on a -ve strand transcript appears as a T-C mismatch. Thus, when interpreting edits one should also check the annotated strand.
2. To be modelled there was a requirement of at least 2 tags in 4 of the 5 replicates associated with the putative edit base at that position. In the case of roots, this is 2 tags in 3 of the 4 replicates since 1 control sample (Re8) is removed.
3. If the editing proportion was exactly 1, the position was filtered out, otherwise NO post-filtering has been done for putative SNPs.
4. The method is for all intents and purposes REFERENCE GENOME (TAIR10) - FREE, in that the reference genome is NOT used to decide something is an A-G or T-C edit (or any other edit type). This means that a SNP presence in BOTH the control and treatment sets should produce a genuine result. The issue is when there is a SNP ONLY present in ONE of the control OR the treatment sets (and at multiple …
5. The reference genome is only used for mapping and generating the base pileups.

## Sheet: HITS_ECT2-HT_roots
ID	GENE	TRANSCRIPTS	NAME	STRAND	REF	TARG	PROP	COUNT	log2FC	p-adj
1_3917952	AT1G11650	AT1G11650.2,AT1G11650.1	RBP45B	+	A	G	0.315096	1578	6.869	0
1_27109424	AT1G72020	AT1G72020.1	AT1G72020	-	T	C	0.3522	1649	5.51441	0
2_8789117	AT2G20360	AT2G20360.1	AT2G20360	+	A	G	0.53009	1700	6.73696	0
2_13413056	AT2G31490	AT2G31490.1	AT2G31490	+	A	G	0.320788	1824	7.98368	0
3_220892	AT3G01560	AT3G01560.1,AT3G01560.2	AT3G01560	+	A	G	0.998864	879	29.2603	0
3_2615637	AT3G08610	AT3G08610.1	AT3G08610	-	T	C	0.430403	2987	5.62992	0
3_3400483	AT3G10860	AT3G10860.1,AT3G10860.2	AT3G10860	+	A	G	0.120723	2145	6.29948	0
3_6324404	AT3G18410	AT3G18410.1	AT3G18410	+	A	G	0.276656	1370	9.29963	0
3_19398150	AT3G52300	AT3G52300.1,AT3G52300.2	ATPQ	+	A	G	0.21037	1558	7.47653	0
3_20556090	AT3G55440	AT3G55440.1	CTIMC	+	A	G	0.253418	3448	5.89496	0
4_8242712	AT4G14320	AT4G14320.1	RPL36AB	-	T	C	0.37563	2907	6.19484	0
4_11266799	AT4G21105	AT4G21105.1,AT4G21105.3	AT4G21105	+	A	G	0.216299	1627	9.39609	0
4_16339708	AT4G34110	AT4G34110.1	PAB2	+	A	G	0.198528	2050	6.06808	0
4_16558578	AT4G34700	AT4G34700.1	CIB22	+	A	G	0.296113	2453	8.34935	0
4_16558584	AT4G34700	AT4G34700.1	CIB22	+	A	G	0.201894	1663	9.3172	0
4_16558627	AT4G34700	AT4G34700.1	CIB22	+	A	G	0.356662	2278	11.4657	0
5_2818412	AT5G08670	AT5G08670.1	AT5G08670	-	T	C	0.278259	1765	7.17671	0
5_22935404	AT5G56670	AT5G56670.1	RPS30C	-	T	C	0.108313	1432	5.30262	0
5_24015619	AT5G59613	AT5G59613.2,AT5G59613.1	AT5G59613	-	T	C	0.23893	2072	8.75766	0
1_28594513	AT1G76200	AT1G76200.1	AT1G76200	+	A	G	0.131878	1196	7.60647	0
1_29916247	AT1G79530	AT1G79530.1	GAPCP1	-	T	C	0.257545	1408	5.27991	0
1_9315599	AT1G26880	AT1G26880.1,AT1G26880.2	RPL34A	-	T	C	0.298467	1324	5.32311	7.94694e-303
4_16558591	AT4G34700	AT4G34700.1	CIB22	+	A	G	0.16553	1286	7.70687	1.20773e-300
5_19390402	AT5G47890	AT5G47890.1	AT5G47890	+	A	G	0.20399	1094	7.01373	1.02673e-297
1_21073671	AT1G56280	AT1G56280.1,AT1G56280.2	ATDI19	-	T	C	0.147184	2221	8.2199	4.10818e-286
5_24016508	AT5G59613	AT5G59613.2	AT5G59613	-	T	C	0.146417	1140	6.61918	5.67734e-286
3_4362214	AT3G13410	AT3G13410.1	AT3G13410	-	T	C	0.28632	1417	6.29065	3.01271e-284
3_19397879	AT3G52300	AT3G52300.1,AT3G52300.2	ATPQ	+	A	G	0.101888	1333	5.9117	1.99014e-277
4_15669517	AT4G32470	AT4G32470.1,AT4G32470.2	QCR7-1	-	T	C	0.256185	1253	8.01128	1.15801e-273
3_368538	AT3G02090	AT3G02090.1,AT3G02090.2	MPPBETA	+	A	G	0.169118	966	6.86021	7.26744e-268
3_3400495	AT3G10860	AT3G10860.1,AT3G10860.2	AT3G10860	+	A	G	0.092155	1439	7.23161	2.66359e-266
1_9315592	AT1G26880	AT1G26880.1,AT1G26880.2	RPL34A	-	T	C	0.217772	946	19.9199	1.11266e-261
1_6214379	AT1G18070	AT1G18070.1,AT1G18070.2,AT1G18070.3	AT1G18070	-	T	C	0.439807	822	6.26696	8.51805e-248
1_24541861	AT1G65930	AT1G65930.1	CICDH	+	A	G	0.113142	1102	6.64366	5.80349e-246
4_16568198	AT4G34720	AT4G34720.1,AT4G34720.2	VHA-C3	-	T	C	0.157816	954	9.16065	2.7904e-245
2_19552022	AT2G47690	AT2G47690.1,AT2G47690.2,AT2G47690.3	AT2G47690	+	A	G	0.249441	1561	4.50538	5.17194e-240
1_3107611	AT1G09590	AT1G09590.1	RPL21A	+	A	G	0.231953	1266	6.23838	2.51801e-236
5_4889648	AT5G15090	AT5G15090.1,AT5G15090.2	VDAC3	-	T	C	0.227863	965	5.90165	4.48215e-234
2_11049357	AT2G25910	AT2G25910.1,AT2G25910.2	AT2G25910	-	T	C	0.486621	782	9.20196	6.85932e-234
1_19153693	AT1G51650	AT1G51650.1	AT1G51650	+	A	G	0.0653981	842	9.90332	1.9246e-227
3_21196838	AT3G57290	AT3G57290.1	EIF3E	-	T	C	0.225038	879	6.26275	4.36944e-224
3_17649810	AT3G47833	AT3G47833.1	SDH7A	+	A	G	0.307558	883	5.75108	1.03008e-223
4_11266690	AT4G21105	AT4G21105.1,AT4G21105.3	AT4G21105	+	A	G	0.125603	1535	7.74844	2.17472e-223
1_23834957	AT1G64230	AT1G64230.1,AT1G64230.2,AT1G64230.5,AT1G64230.3,AT1G64230.4	UBC28	+	A	G	0.0816662	845	6.17893	2.22131e-219
4_6733033	AT4G11010	AT4G11010.1	NDPK3	-	T	C	0.0891625	956	5.48226	8.05921e-218
3_10056052	AT3G27240	AT3G27240.1	CYC11	-	T	C	0.214045	762	7.90462	5.1181e-213
5_20693021	AT5G50850	AT5G50850.1	PDH2	+	A	G	0.159888	971	19.7087	9.57974e-211
1_24686345	AT1G66240	AT1G66240.1,AT1G66240.2,AT1G66240.3	ATX1	-	T	C	0.188796	1193	5.46382	5.94159e-204
5_13765403	AT5G35590	AT5G35590.1	PAA1	-	T	C	0.404936	1050	5.95664	1.80996e-203
3_21196868	AT3G57290	AT3G57290.1	EIF3E	-	T	C	0.372008	1321	4.41866	1.08002e-202
5_9837104	AT5G27770	AT5G27770.1	RPL22C	+	A	G	0.133771	734	7.39258	4.28973e-201
4_251124	AT4G00585	AT4G00585.1	AT4G00585	-	T	C	0.227076	629	19.4798	4.82039e-201
2_12769180	AT2G29960	AT2G29960.3,AT2G29960.1,AT2G29960.2	CYP19-4	-	T	C	0.443575	680	6.188	2.28142e-200
2_17625649	AT2G42310	AT2G42310.1	AT2G42310	+	A	G	0.359409	1314	5.68672	1.54149e-199
3_8475775	AT3G23600	AT3G23600.1,AT3G23600.2	AT3G23600	+	A	G	0.3	681	9.87633	1.78737e-199
4_16039120	AT4G33250	AT4G33250.1	TIF3K1	-	T	C	0.249431	658	7.80437	1.12893e-198
4_11266724	AT4G21105	AT4G21105.1,AT4G21105.3	AT4G21105	+	A	G	0.0687727	738	8.76945	1.27061e-197
3_3400560	AT3G10860	AT3G10860.1,AT3G10860.2	AT3G10860	+	A	G	0.0809058	686	8.09452	1.65335e-197
3_4433891	AT3G13580	AT3G13580.1,AT3G13580.2,AT3G13580.9,AT3G13580.3,AT3G13580.7,AT3G13580.8,AT3G13580.6,AT3G13580.5,AT3G13580.4	RPL7D	+	A	G	0.190804	859	5.55963	2.63907e-197
4_18011318	AT4G38510	AT4G38510.2,AT4G38510.3,AT4G38510.4,AT4G38510.5,AT4G38510.1	VHA-B2	-	T	C	0.20577	1134	5.39321	3.30963e-197
5_21632679	AT5G53300	AT5G53300.4,AT5G53300.2,AT5G53300.1	UBC10	-	T	C	0.258186	757	20.2655	8.09711e-196
1_2408763	AT1G07770	AT1G07770.3,AT1G07770.2,AT1G07770.1	RPS15AA	-	T	C	0.0734545	865	4.68717	6.20741e-194
1_6213978	AT1G18070	AT1G18070.1,AT1G18070.2,AT1G18070.3	AT1G18070	-	T	C	0.523088	725	4.93344	1.49271e-193
3_2615640	AT3G08610	AT3G08610.1	AT3G08610	-	T	C	0.128964	911	5.767	7.34197e-192
1_3917865	AT1G11650	AT1G11650.2,AT1G11650.1	RBP45B	+	A	G	0.102154	716	6.61018	1.08628e-191
3_19543080	AT3G52730	AT3G52730.1,AT3G52730.2	AT3G52730	-	T	C	0.203021	820	6.47772	1.71063e-190
1_9376229	AT1G27000	AT1G27000.1	AT1G27000	+	A	G	0.365571	756	4.97578	5.68148e-190
5_19091940	AT5G47030	AT5G47030.1	AT5G47030	+	A	G	0.112022	656	6.61762	1.57287e-187
3_19398115	AT3G52300	AT3G52300.1,AT3G52300.2	ATPQ	+	A	G	0.112812	1017	20.6518	4.90468e-187
1_5776442	AT1G16890	AT1G16890.2,AT1G16890.1,AT1G16890.3	UBC36	-	T	C	0.676215	779	7.30485	4.54803e-186
3_3399924	AT3G10860	AT3G10860.1,AT3G10860.2	AT3G10860	+	A	G	0.127337	2622	4.66564	1.63423e-184
4_18149004	AT4G38920	AT4G38920.1,AT4G38920.2	VHA-C3	+	A	G	0.13344	832	7.32422	7.91063e-184
4_18257855	AT4G39200	AT4G39200.1,AT4G39200.2	RPS25E	+	A	G	0.0445754	1021	6.02843	1.87325e-182
5_19390394	AT5G47890	AT5G47890.1	AT5G47890	+	A	G	0.221007	1313	5.4953	2.71836e-182
4_18257627	AT4G39200	AT4G39200.1,AT4G39200.2	RPS25E	+	A	G	0.0413244	815	4.53292	2.37237e-180
4_16476846	AT4G34450	AT4G34450.1	AT4G34450	+	A	G	0.253949	627	8.02947	3.15161e-179
5_19292839	AT5G47570	AT5G47570.1	AT5G47570	-	T	C	0.155537	743	6.36609	3.52177e-179
3_19660777	AT3G53020	AT3G53020.1	RPL24B	-	T	C	0.169348	1200	5.43057	4.51837e-179
3_10780435	AT3G28715	AT3G28715.1,AT3G28715.2	VHA-D2	+	A	G	0.313682	564	8.64914	2.27312e-177
3_87628	AT3G01280	AT3G01280.1	VDAC1	+	A	G	0.105583	626	6.90496	3.62612e-177
1_10640526	AT1G30230	AT1G30230.1,AT1G30230.2	AT1G30230	+	A	G	0.0792504	647	5.95219	1.09197e-175
5_26937078	AT5G67500	AT5G67500.3,AT5G67500.1,AT5G67500.2	VDAC2	+	A	G	0.177927	848	4.9323	8.4283e-175
4_14562907	AT4G29735	AT4G29735.1,AT4G29735.2	AT4G29735	-	T	C	0.355803	607	7.26266	8.67599e-175
3_4433893	AT3G13580	AT3G13580.1,AT3G13580.2,AT3G13580.9,AT3G13580.3,AT3G13580.7,AT3G13580.8,AT3G13580.6,AT3G13580.5,AT3G13580.4	RPL7D	+	A	G	0.162928	770	8.62259	1.34182e-174
1_7878975	AT1G22300	AT1G22300.1,AT1G22300.2,AT1G22300.3	GRF10	-	T	C	0.232811	684	7.98856	7.13368e-174
4_16476814	AT4G34450	AT4G34450.1	AT4G34450	+	A	G	0.212496	704	6.19511	5.81586e-172
5_6851714	AT5G20290	AT5G20290.1	RPS8A	-	T	C	0.0547863	819	6.3809	8.50761e-172
1_18929403	AT1G51070	AT1G51070.1,AT1G51070.2	BHLH115	+	A	G	0.224228	733	5.3223	5.71021e-171
3_19225512	AT3G51840	AT3G51840.1	ACX4	-	T	C	0.371577	502	9.72716	2.17466e-170
5_19390357	AT5G47890	AT5G47890.1	AT5G47890	+	A	G	0.0892052	633	8.51695	4.15619e-167
2_18205472	AT2G43970	AT2G43970.1,AT2G43970.2	LARP6B	-	T	C	0.150233	678	7.92342	7.48585e-167
3_2389457	AT3G07480	AT3G07480.1	AT3G07480	+	A	G	0.107661	631	5.69931	1.51062e-165
2_14019096	AT2G33040	AT2G33040.1	ATPC	-	T	C	0.0555811	724	5.38346	2.10942e-165
1_17969062	AT1G48600	AT1G48600.1,AT1G48600.2	NMT2	+	A	G	0.18966	631	7.48536	2.47914e-165
2_8789073	AT2G20360	AT2G20360.1	AT2G20360	+	A	G	0.165739	625	6.92701	3.75172e-165
3_2917846	AT3G09500	AT3G09500.1	RPL35A	+	A	G	0.070499	623	5.31168	2.35594e-164
1_5711827	AT1G16700	AT1G16700.1	AT1G16700	+	A	G	0.424135	478	9.78129	5.54359e-164
1_22053703	AT1G59900	AT1G59900.1	E1 ALPHA	+	A	G	0.394958	564	5.02114	5.93877e-162
4_16568197	AT4G34720	AT4G34720.1,AT4G34720.2	VHA-C3	-	T	C	0.155616	920	6.6864	1.69765e-160
4_16558612	AT4G34700	AT4G34700.1	CIB22	+	A	G	0.0837942	606	19.6491	3.03519e-160
5_23208712	AT5G57300	AT5G57300.1,AT5G57300.3,AT5G57300.2,AT5G57300.4	COQ5	-	T	C	0.553439	523	6.72844	8.84304e-160
4_14562922	AT4G29735	AT4G29735.1,AT4G29735.2	AT4G29735	-	T	C	0.30629	521	18.5222	1.14208e-158
2_9320622	AT2G21870	AT2G21870.1,AT2G21870.2	MGP1	-	T	C	0.0935703	895	4.77531	2.29085e-158
5_23208751	AT5G57300	AT5G57300.1,AT5G57300.3,AT5G57300.2,AT5G57300.4	COQ5	-	T	C	0.593861	503	5.11897	2.67658e-158
5_19169218	AT5G47210	AT5G47210.1,AT5G47210.2,AT5G47210.3	AT5G47210	-	T	C	0.134726	632	5.4499	1.07533e-157
5_16230825	AT5G40510	AT5G40510.1,AT5G40510.2	AT5G40510	+	A	G	0.379328	745	6.55172	1.20058e-156
1_27109417	AT1G72020	AT1G72020.1	AT1G72020	-	T	C	0.124754	570	8.38472	1.29461e-156
1_29664566	AT1G78900	AT1G78900.1,AT1G78900.2	VHA-A	+	A	G	0.169499	1137	5.40941	2.20087e-156
1_23835329	AT1G64230	AT1G64230.1,AT1G64230.2,AT1G64230.5,AT1G64230.3,AT1G64230.4	UBC28	+	A	G	0.521542	1150	8.92838	4.81101e-156
4_16338016	AT4G34110	AT4G34110.1	PAB2	+	A	G	0.109801	680	6.19401	1.79589e-155
2_9320620	AT2G21870	AT2G21870.1,AT2G21870.2	MGP1	-	T	C	0.0707552	668	5.71386	4.9251e-155
3_1245775	AT3G04600	AT3G04600.1,AT3G04600.3,AT3G04600.2	AT3G04600	+	A	G	0.485769	512	6.00775	3.49557e-154
4_15671030	AT4G32470	AT4G32470.1,AT4G32470.2	QCR7-1	-	T	C	0.0766683	764	4.01863	9.44612e-154
1_5203757	AT1G15120	AT1G15120.1,AT1G15120.2	AT1G15120	+	A	G	0.0610797	594	6.18112	3.15673e-153
5_22057256	AT5G54310	AT5G54310.1	AGD5	-	T	C	0.687697	436	5.76508	2.77184e-152
4_15669641	AT4G32470	AT4G32470.1,AT4G32470.2	QCR7-1	-	T	C	0.0588355	578	9.31681	7.39612e-152
3_22138039	AT3G59920	AT3G59920.1	GDI2	+	A	G	0.188034	814	5.75166	1.4983e-151
4_14674036	AT4G30010	AT4G30010.1	AT4G30010	+	A	G	0.208887	597	19.3096	1.54838e-150
1_22358202	AT1G60730	AT1G60730.1,AT1G60730.2	AT1G60730	-	T	C	0.511586	574	6.12585	8.06059e-150
4_9714414	AT4G17390	AT4G17390.1	RPL15B	-	T	C	0.0930959	596	5.93785	2.90817e-149
1_28594560	AT1G76200	AT1G76200.1	AT1G76200	+	A	G	0.113394	905	4.64688	1.26086e-148
4_11759398	AT4G22220	AT4G22220.1	ISU1	-	T	C	0.247913	594	7.88972	4.31478e-148
4_16476675	AT4G34450	AT4G34450.1	AT4G34450	+	A	G	0.109627	591	6.0621	5.10323e-148
5_5939344	AT5G17920	AT5G17920.2,AT5G17920.1	MS1	+	A	G	0.0710982	538	6.0817	6.62439e-147
3_3400504	AT3G10860	AT3G10860.1,AT3G10860.2	AT3G10860	+	A	G	0.0385753	587	5.67047	3.9965e-146
2_18046779	AT2G43460	AT2G43460.1	RPL38B	-	T	C	0.0486153	725	4.02736	4.44438e-146
1_21073367	AT1G56280	AT1G56280.1,AT1G56280.2	ATDI19	-	T	C	0.0652515	624	4.36519	4.77393e-146
2_8807890	AT2G20420	AT2G20420.1	AT2G20420	+	A	G	0.14716	557	7.71291	6.43006e-146
1_6214257	AT1G18070	AT1G18070.1,AT1G18070.2,AT1G18070.3	AT1G18070	-	T	C	0.378804	697	5.94733	1.27566e-145
3_8475521	AT3G23600	AT3G23600.1,AT3G23600.2	AT3G23600	+	A	G	0.0606166	698	5.09821	3.0322e-145
2_15670558	AT2G37340	AT2G37340.1,AT2G37340.3,AT2G37340.6,AT2G37340.2,AT2G37340.5,AT2G37340.4	RS2Z33	-	T	C	0.338325	836	3.46594	5.36048e-145
3_20556187	AT3G55440	AT3G55440.1	CTIMC	+	A	G	0.0687093	527	8.18576	7.07421e-145
5_16230828	AT5G40510	AT5G40510.1,AT5G40510.2	AT5G40510	+	A	G	0.278248	559	9.29961	1.17006e-144
1_4927311	AT1G14400	AT1G14400.1,AT1G14400.2	UBC1	-	T	C	0.238198	661	5.58277	1.44892e-144
1_21073475	AT1G56280	AT1G56280.1,AT1G56280.2	ATDI19	-	T	C	0.189873	1980	3.43586	3.6815e-144
1_23733632	AT1G63940	AT1G63940.1,AT1G63940.2,AT1G63940.3,AT1G63940.4	MDAR6	+	A	G	0.212606	452	9.27462	5.61311e-144
2_17698031	AT2G42500	AT2G42500.1,AT2G42500.2	PP2A4	-	T	C	0.299828	522	5.88674	1.33902e-143
4_9714517	AT4G17390	AT4G17390.1	RPL15B	-	T	C	0.0385553	585	5.43513	4.5733e-142
1_29206969	AT1G77710	AT1G77710.1	AT1G77710	+	A	G	0.0991883	501	9.24822	4.29325e-141
1_21379873	AT1G57720	AT1G57720.1,AT1G57720.2	AT1G57720	+	A	G	0.0888127	570	4.95365	6.01285e-141
2_18205475	AT2G43970	AT2G43970.1,AT2G43970.2	LARP6B	-	T	C	0.100298	471	18.9871	2.06025e-140
5_16315460	AT5G40770	AT5G40770.1	PHB3	-	T	C	0.27014	560	4.96326	4.50976e-140
5_23719508	AT5G58710	AT5G58710.1	CYP20-1	+	A	G	0.188706	538	6.32356	5.40799e-140
1_18285746	AT1G49410	AT1G49410.1	TOM6	-	T	C	0.11153	562	5.66061	3.94752e-139
5_13108430	AT5G34850	AT5G34850.1	PAP26	-	T	C	0.115201	532	6.80776	4.08137e-139
5_2828327	AT5G08690	AT5G08690.1	AT5G08690	+	A	G	0.0780731	517	5.71891	4.22901e-139
5_15990902	AT5G39950	AT5G39950.1	TRX2	-	T	C	0.192624	585	5.58167	4.68681e-139
4_11266715	AT4G21105	AT4G21105.1,AT4G21105.3	AT4G21105	+	A	G	0.0470277	515	6.35995	9.35124e-139
1_2685269	AT1G08480	AT1G08480.1	SDH6	+	A	G	0.163337	654	5.75875	6.67994e-137
4_6732992	AT4G11010	AT4G11010.1	NDPK3	-	T	C	0.0526261	501	6.12058	1.72904e-135
2_9320466	AT2G21870	AT2G21870.1,AT2G21870.2	MGP1	-	T	C	0.0542736	461	8.12545	1.03522e-133
2_674549	AT2G02510	AT2G02510.1	AT2G02510	+	A	G	0.219472	807	6.59015	1.87686e-133
3_2823365	AT3G09200	AT3G09200.1,AT3G09200.2	RPP0B	-	T	C	0.0565945	463	6.75714	2.20137e-133
1_25236051	AT1G67350	AT1G67350.1,AT1G67350.2	AT1G67350	+	A	G	0.0450344	497	6.72518	4.68034e-133
4_18258389	AT4G39200	AT4G39200.1,AT4G39200.2	RPS25E	+	A	G	0.0428783	752	4.08308	6.11122e-133
5_16952633	AT5G42390	AT5G42390.1	AT5G42390	+	A	G	0.492347	579	5.00608	7.80772e-133
1_21074077	AT1G56280	AT1G56280.1,AT1G56280.2	ATDI19	-	T	C	0.0489706	754	5.24153	3.13785e-132
3_19318034	AT3G52090	AT3G52090.1,AT3G52090.2	NRPB11	-	T	C	0.262344	441	9.21815	3.49413e-131
2_14019060	AT2G33040	AT2G33040.1	ATPC	-	T	C	0.0473615	613	4.98225	4.79216e-130
1_27540293	AT1G73230	AT1G73230.1	AT1G73230	-	T	C	0.429982	479	5.34859	7.41716e-130
3_20556273	AT3G55440	AT3G55440.1	CTIMC	+	A	G	0.17315	454	7.014	9.35625e-129
2_8788785	AT2G20360	AT2G20360.1	AT2G20360	+	A	G	0.107257	869	3.69287	2.06633e-128
4_16541697	AT4G34640	AT4G34640.1,AT4G34640.2	SQS1	+	A	G	0.3426	419	8.12872	8.60913e-128
3_15234623	AT3G43300	AT3G43300.3,AT3G43300.2,AT3G43300.1	ATMIN7	-	T	C	0.222277	447	6.70184	3.28924e-127
5_3791276	AT5G11770	AT5G11770.1	AT5G11770	-	T	C	0.0616144	761	5.79187	5.65865e-127
5_6267437	AT5G18800	AT5G18800.2,AT5G18800.1	AT5G18800	+	A	G	0.0683245	544	4.91804	5.72797e-127
4_14297795	AT4G29010	AT4G29010.1	AIM1	-	T	C	0.195131	529	4.53216	2.13053e-126
2_16475904	AT2G39460	AT2G39460.1,AT2G39460.2	RPL23AA	+	A	G	0.0841908	540	7.07153	4.25789e-126
2_18381646	AT2G44520	AT2G44520.1	COX10	+	A	G	0.585961	576	3.61137	7.98886e-126
5_19951470	AT5G49210	AT5G49210.1,AT5G49210.2,AT5G49210.3	AT5G49210	+	A	G	0.66212	631	2.83411	1.6777e-125
3_2616668	AT3G08610	AT3G08610.1	AT3G08610	-	T	C	0.0531621	538	5.43936	6.83766e-125
5_25749639	AT5G64400	AT5G64400.1,AT5G64400.2,AT5G64400.3	AT5G64400	+	A	G	0.033718	561	5.0752	1.73179e-124
1_18218086	AT1G49240	AT1G49240.1	ACT8	+	A	G	0.0917952	631	7.58907	4.09121e-123
1_18218126	AT1G49240	AT1G49240.1	ACT8	+	A	G	0.101317	554	9.24495	1.8559e-122
3_17637399	AT3G47810	AT3G47810.3,AT3G47810.1,AT3G47810.2	VPS29	-	T	C	0.143271	544	5.08298	2.77553e-122
3_19365878	AT3G52200	AT3G52200.1,AT3G52200.2	LTA3	+	A	G	0.250527	475	8.08075	6.83317e-122
1_23835258	AT1G64230	AT1G64230.1,AT1G64230.2,AT1G64230.5,AT1G64230.3,AT1G64230.4	UBC28	+	A	G	0.349291	1182	2.14868	8.83253e-122
5_19092209	AT5G47030	AT5G47030.1	AT5G47030	+	A	G	0.224834	373	9.01817	1.79173e-121
2_7566235	AT2G17420	AT2G17420.1,AT2G17420.2	NTRA	+	A	G	0.0949803	579	7.56964	1.95306e-121
4_16039122	AT4G33250	AT4G33250.1	TIF3K1	-	T	C	0.155082	415	5.57792	2.96942e-121
4_13554788	AT4G27000	AT4G27000.1	RBP45C	-	T	C	0.537757	470	5.21633	9.5333e-121
3_4911466	AT3G14600	AT3G14600.1	RPL18AC	+	A	G	0.0423303	497	4.83809	1.04976e-120
4_16369982	AT4G34180	AT4G34180.1	AT4G34180	-	T	C	0.140016	521	19.544	3.34172e-120
2_9237503	AT2G21580	AT2G21580.1,AT2G21580.2	RPS25B	+	A	G	0.074264	449	8.99323	2.04087e-119
4_18149001	AT4G38920	AT4G38920.1,AT4G38920.2	VHA-C3	+	A	G	0.064894	410	17.3197	2.35541e-119
4_16774406	AT4G35260	AT4G35260.1	IDH1	-	T	C	0.2087	403	8.92082	4.50499e-119
4_13944223	AT4G28060	AT4G28060.1	COX6B-3	-	T	C	0.0634418	421	8.87737	1.77178e-118
5_14900475	AT5G37510	AT5G37510.1,AT5G37510.2	EMB1467	+	A	G	0.264933	377	9.07957	4.64689e-118
5_15854152	AT5G39600	AT5G39600.1	AT5G39600	-	T	C	0.5325	426	5.37535	5.47888e-118
1_3136642	AT1G09690	AT1G09690.1	RPL21A	-	T	C	0.0195661	450	5.92545	1.64238e-117
4_6948143	AT4G11420	AT4G11420.1	TIF3A1	-	T	C	0.13004	516	6.07391	9.72548e-117
5_25393256	AT5G63400	AT5G63400.1,AT5G63400.2	ADK1	-	T	C	0.0927018	503	5.21445	3.53598e-116
2_17591619	AT2G42210	AT2G42210.1,AT2G42210.3,AT2G42210.4,AT2G42210.2,AT2G42210.5	OEP163	+	A	G	0.124472	383	18.9877	4.34254e-116
3_21635533	AT3G58500	AT3G58500.1	PP2A3	-	T	C	0.135281	528	6.96602	1.04711e-115
1_19854861	AT1G53240	AT1G53240.1	mMDH1	-	T	C	0.0730306	394	6.85538	2.03954e-115
4_16558626	AT4G34700	AT4G34700.1	CIB22	+	A	G	0.0637873	415	19.2173	2.60055e-115
4_16337578	AT4G34110	AT4G34110.1	PAB2	+	A	G	0.078764	520	4.82829	4.64324e-115
5_22350479	AT5G55070	AT5G55070.1	AT5G55070	+	A	G	0.244706	416	7.28346	5.15967e-115
1_26127869	AT1G69510	AT1G69510.1,AT1G69510.3,AT1G69510.2	AT1G69510	+	A	G	0.283061	381	8.02238	5.28704e-114
5_13108739	AT5G34850	AT5G34850.1	PAP26	-	T	C	0.0732226	516	5.12325	5.53974e-114
5_17622563	AT5G43830	AT5G43830.1	AT5G43830	-	T	C	0.174513	708	5.91527	9.09652e-114
4_6732834	AT4G11010	AT4G11010.1	NDPK3	-	T	C	0.0561733	485	6.0866	1.01811e-113
5_19552634	AT5G48230	AT5G48230.2,AT5G48230.1	AAT1	-	T	C	0.144852	446	4.94533	2.48613e-113
4_9585864	AT4G17040	AT4G17040.1	CLPR4	-	T	C	0.546053	332	8.17823	2.57451e-113
4_7864558	AT4G13520	AT4G13520.1,AT4G13520.2	SMAP1	+	A	G	0.114781	497	4.63877	5.12525e-113
4_16558580	AT4G34700	AT4G34700.1	CIB22	+	A	G	0.0519464	403	18.8541	1.45947e-112
2_14532915	AT2G34480	AT2G34480.1,AT2G34480.2	RPL18AB	-	T	C	0.0433405	465	5.03193	1.83234e-112
4_17329859	AT4G36760	AT4G36760.1,AT4G36760.3,AT4G36760.2	ATAPP1	+	A	G	0.29304	400	5.84945	1.29757e-111
3_3400526	AT3G10860	AT3G10860.1,AT3G10860.2	AT3G10860	+	A	G	0.0289066	377	18.129	1.48567e-111
5_25749781	AT5G64400	AT5G64400.1,AT5G64400.2,AT5G64400.3	AT5G64400	+	A	G	0.0378624	491	6.27436	1.54879e-111
2_16475987	AT2G39460	AT2G39460.1,AT2G39460.2	RPL23AA	+	A	G	0.106571	386	6.83878	1.89911e-111
5_26959352	AT5G67590	AT5G67590.1	FRO1	+	A	G	0.109184	428	17.1852	1.99006e-111
2_223206	AT2G01490	AT2G01490.1,AT2G01490.2	PAHX	+	A	G	0.370458	469	6.9444	2.15962e-111
1_28528477	AT1G76010	AT1G76010.1,AT1G76010.2	AT1G76010	-	T	C	0.0841696	411	6.02031	6.66063e-111
3_20699518	AT3G55750	AT3G55750.1	RPL35AD	+	A	G	0.0628185	530	4.5847	1.25313e-110
2_8558102	AT2G19830	AT2G19830.2,AT2G19830.1	VPS32.1	-	T	C	0.38512	528	5.06841	1.42718e-110
1_9527845	AT1G27435	AT1G27435.1	AT1G27435	-	T	C	0.176823	325	18.1508	3.58781e-110
5_24893037	AT5G61970	AT5G61970.1	AT5G61970	+	A	G	0.405941	328	8.99386	3.54644e-109
4_11266414	AT4G21105	AT4G21105.1,AT4G21105.3	AT4G21105	+	A	G	0.0952683	1053	4.93476	1.60094e-108
1_27109736	AT1G72020	AT1G72020.1	AT1G72020	-	T	C	0.0421154	524	3.91344	4.01636e-108
1_3513734	AT1G10630	AT1G10630.1,AT1G10630.2	ATARFA1F	-	T	C	0.0844077	622	4.44081	7.80556e-108
2_18206060	AT2G43970	AT2G43970.1,AT2G43970.2	LARP6B	-	T	C	0.0779846	486	4.35884	4.13051e-107
5_5081977	AT5G15610	AT5G15610.2,AT5G15610.1	AT5G15610	+	A	G	0.305503	322	8.8956	9.75298e-107
2_16838691	AT2G40316	AT2G40316.1,AT2G40316.2,AT2G40316.3	AT2G40316	+	A	G	0.575342	462	3.48737	1.05428e-106
2_13877049	AT2G32720	AT2G32720.1,AT2G32720.2	CYTB5-B	-	T	C	0.171116	500	4.47875	1.41172e-106
1_3159473	AT1G09760	AT1G09760.1	U2A'	-	T	C	0.223529	418	5.61892	5.25032e-106
3_17088714	AT3G46430	AT3G46430.1	AT3G46430	+	A	G	0.269627	340	18.2573	5.80205e-106
4_6173816	AT4G09800	AT4G09800.1	RPS18A	+	A	G	0.0759406	440	4.51458	2.70239e-105
5_6582198	AT5G19510	AT5G19510.1	AT5G19510	-	T	C	0.0547102	809	3.75796	2.70239e-105
3_19892084	AT3G53670	AT3G53670.1,AT3G53670.2	AT3G53670	+	A	G	0.30897	465	5.18637	5.07697e-105
5_2362683	AT5G07470	AT5G07470.1	MSRA3	-	T	C	0.280964	338	18.9603	5.11552e-105
2_17625323	AT2G42310	AT2G42310.1	AT2G42310	+	A	G	0.0771433	485	4.29286	8.99178e-105
4_9773234	AT4G17520	AT4G17520.1	AT4G17520	+	A	G	0.142713	567	5.11548	1.0134e-104
1_18177717	AT1G49140	AT1G49140.1,AT1G49140.2	AT1G49140	-	T	C	0.137343	822	4.54745	3.39552e-104
4_14451097	AT4G29350	AT4G29350.1	PRO2	+	A	G	0.0277702	409	5.23416	5.53211e-104
2_16592559	AT2G39780	AT2G39780.1	RNS2	+	A	G	0.15795	450	4.71277	5.66996e-104
3_14228650	AT3G42050	AT3G42050.1	VHA-H	-	T	C	0.181708	300	17.6387	1.39803e-103
2_10183158	AT2G23930	AT2G23930.1,AT2G23930.2	SNRNP-G	+	A	G	0.250391	320	7.83545	2.29586e-103
4_7864559	AT4G13520	AT4G13520.1,AT4G13520.2	SMAP1	+	A	G	0.0849643	369	6.70329	2.93669e-103
3_3400492	AT3G10860	AT3G10860.1,AT3G10860.2	AT3G10860	+	A	G	0.0285591	463	5.47999	3.15959e-103
5_6764142	AT5G20020	AT5G20020.1	RAN2	+	A	G	0.0461169	557	4.03451	6.45609e-103
3_17088679	AT3G46430	AT3G46430.1	AT3G46430	+	A	G	0.191036	341	17.6336	1.43178e-102
3_15800146	AT3G44010	AT3G44010.2,AT3G44010.1	RPS29A	-	T	C	0.046631	445	4.86664	2.2628e-102
3_19652192	AT3G52990	AT3G52990.1,AT3G52990.2	AT3G52990	+	A	G	0.105684	370	7.09266	5.9377e-102
5_9874148	AT5G27850	AT5G27850.2,AT5G27850.1	RPL18C	+	A	G	0.0283994	514	3.70998	8.21504e-102
3_3399912	AT3G10860	AT3G10860.1,AT3G10860.2	AT3G10860	+	A	G	0.0286496	555	5.99664	1.04185e-101
5_24612182	AT5G61170	AT5G61170.1	RPS19C	+	A	G	0.0556103	395	6.0977	2.61653e-101
5_2824831	AT5G08680	AT5G08680.1	AT5G08680	+	A	G	0.172426	469	8.91095	3.00019e-101
5_18662994	AT5G46020	AT5G46020.1	AT5G46020	-	T	C	0.246269	330	8.77253	3.52211e-101
2_15670623	AT2G37340	AT2G37340.1,AT2G37340.3,AT2G37340.6,AT2G37340.2,AT2G37340.5,AT2G37340.4	RS2Z33	-	T	C	0.301429	907	2.74926	4.54633e-101
1_24249114	AT1G65290	AT1G65290.1	MTACP2	-	T	C	0.0794846	623	4.991	4.70466e-101
5_4978835	AT5G15320	AT5G15320.1,AT5G15320.2	AT5G15320	+	A	G	0.332762	388	8.86588	8.75873e-101
1_27850034	AT1G74060	AT1G74060.1	RPL6B	-	T	C	0.104167	420	4.43584	9.47716e-101
3_19397848	AT3G52300	AT3G52300.1,AT3G52300.2	ATPQ	+	A	G	0.0370949	475	5.55699	1.11007e-100
3_20223346	AT3G54640	AT3G54640.1	TSA1	-	T	C	0.13835	399	5.50356	1.11007e-100
3_6096310	AT3G17810	AT3G17810.1	PYD1	+	A	G	0.100735	411	17.9862	1.7693e-100
1_4608488	AT1G13440	AT1G13440.1,AT1G13440.2	GAPC2	-	T	C	0.022544	439	4.88384	2.22701e-100
3_2416466	AT3G07568	AT3G07568.1	AT3G07568	-	T	C	0.24127	532	6.44298	2.62761e-100
5_983985	AT5G03740	AT5G03740.1	HDT3	+	A	G	0.379436	417	4.65926	2.68125e-100
5_3570571	AT5G11200	AT5G11200.1,AT5G11200.2,AT5G11200.3	RH15	+	A	G	0.258687	536	4.14708	5.84434e-100
2_13412205	AT2G31490	AT2G31490.1	AT2G31490	+	A	G	0.0458157	519	5.11919	8.96601e-100
5_14275208	AT5G36230	AT5G36230.1,AT5G36230.2	AT5G36230	+	A	G	0.214318	470	3.78871	1.08122e-99
3_6998505	AT3G20050	AT3G20050.1	CCT1	-	T	C	0.184893	492	3.92919	1.18902e-99
1_10858542	AT1G30630	AT1G30630.1	AT1G30630	-	T	C	0.175644	375	7.73621	1.21909e-99
3_2411600	AT3G07560	AT3G07560.1	PEX13	-	T	C	0.14206	331	6.68814	2.07016e-99
2_14532816	AT2G34480	AT2G34480.1,AT2G34480.2	RPL18AB	-	T	C	0.0541396	325	19.4957	3.37216e-99
4_251084	AT4G00585	AT4G00585.1	AT4G00585	-	T	C	0.224932	332	6.37968	3.64538e-99
1_19884472	AT1G53310	AT1G53310.2,AT1G53310.1,AT1G53310.3	PPC1	-	T	C	0.111457	465	4.12453	5.2643e-99
5_25735287	AT5G64350	AT5G64350.1	FKBP12	-	T	C	0.094376	2153	3.39972	9.87744e-99
1_4639127	AT1G13560	AT1G13560.1,AT1G13560.3,AT1G13560.2	AAPT1	-	T	C	0.462979	519	3.19981	2.47194e-98
1_26688422	AT1G70770	AT1G70770.1	AT1G70770	-	T	C	0.327214	303	7.70745	3.57059e-98
4_15669693	AT4G32470	AT4G32470.1,AT4G32470.2	QCR7-1	-	T	C	0.0253489	356	6.61467	3.80014e-98
2_18815124	AT2G45670	AT2G45670.1,AT2G45670.2	LPEAT2	-	T	C	0.247511	348	5.29837	5.42187e-98
2_775235	AT2G02760	AT2G02760.1,AT2G02760.4,AT2G02760.2,AT2G02760.3	UBC2	+	A	G	0.275623	398	4.74333	5.68077e-98
1_2637660	AT1G08360	AT1G08360.1	RPL10AA	+	A	G	0.0695145	441	5.87447	7.03136e-98
2_15670512	AT2G37340	AT2G37340.1,AT2G37340.3,AT2G37340.6,AT2G37340.2,AT2G37340.5,AT2G37340.4	RS2Z33	-	T	C	0.329919	612	3.45632	1.18992e-97
1_29207894	AT1G77710	AT1G77710.1	AT1G77710	+	A	G	0.119072	349	7.69186	2.34301e-97
5_22393956	AT5G55190	AT5G55190.1	RAN3	+	A	G	0.110909	427	7.75205	2.53036e-97
2_674529	AT2G02510	AT2G02510.1	AT2G02510	+	A	G	0.0786098	337	7.61022	3.72248e-97
2_13182351	AT2G30980	AT2G30980.1	ASK6	-	T	C	0.425366	436	3.97863	3.893e-97
1_21073048	AT1G56280	AT1G56280.1,AT1G56280.2	ATDI19	-	T	C	0.117714	309	7.09792	6.03415e-97
1_3159374	AT1G09760	AT1G09760.1	U2A'	-	T	C	0.314189	372	5.24983	6.7663e-97
5_16315431	AT5G40770	AT5G40770.1	PHB3	-	T	C	0.168791	331	8.61088	1.80218e-96
3_21718517	AT3G58730	AT3G58730.1	VHA-D	-	T	C	0.196529	453	4.98577	2.34201e-96
1_1365458	AT1G04850	AT1G04850.1,AT1G04850.2	AT1G04850	-	T	C	0.691163	1533	2.70523	2.74925e-96
5_3792578	AT5G11770	AT5G11770.1	AT5G11770	-	T	C	0.0549152	505	3.80692	6.38741e-96
4_9644877	AT4G17170	AT4G17170.1	RABB1C	-	T	C	0.327586	418	5.67407	6.60963e-96
5_24015610	AT5G59613	AT5G59613.2,AT5G59613.1	AT5G59613	-	T	C	0.0482821	371	8.73295	9.93355e-96
1_29746683	AT1G79075	AT1G79075.1,AT1G79075.2	AT1G79075	+	A	G	0.381747	389	7.1474	1.22444e-95
5_20082092	AT5G49510	AT5G49510.1,AT5G49510.2	PFD3	+	A	G	0.325424	576	3.03314	1.30034e-95
5_24016511	AT5G59613	AT5G59613.2	AT5G59613	-	T	C	0.0476308	385	7.61354	3.03598e-95
3_19398147	AT3G52300	AT3G52300.1,AT3G52300.2	ATPQ	+	A	G	0.0552816	426	8.80023	3.68501e-95
5_25665106	AT5G64130	AT5G64130.1,AT5G64130.3,AT5G64130.2	AT5G64130	-	T	C	0.0343671	338	5.66338	3.87091e-95
2_9320281	AT2G21870	AT2G21870.1,AT2G21870.2	MGP1	-	T	C	0.107527	280	18.7718	9.28693e-95
1_29725124	AT1G79010	AT1G79010.1	AT1G79010	-	T	C	0.156417	468	7.11155	3.13312e-94
1_18216685	AT1G49240	AT1G49240.1	ACT8	+	A	G	0.0490238	580	3.61069	9.10868e-94
1_3663690	AT1G10950	AT1G10950.1	TMN1	+	A	G	0.330366	334	5.80024	9.65292e-94
2_673535	AT2G02510	AT2G02510.1	AT2G02510	+	A	G	0.0455246	325	7.50989	1.24405e-93
5_6689092	AT5G19780	AT5G19780.1	TUBA5	+	A	G	0.22449	286	7.03892	1.26199e-93
2_9237435	AT2G21580	AT2G21580.1,AT2G21580.2	RPS25B	+	A	G	0.0986898	934	4.83544	1.32129e-93
5_18503829	AT5G45620	AT5G45620.1,AT5G45620.2	RPN9A	+	A	G	0.344444	310	6.03668	1.45719e-93
4_16374048	AT4G34200	AT4G34200.1	PGDH1	-	T	C	0.106225	372	5.27992	2.2866e-93
1_21073900	AT1G56280	AT1G56280.1,AT1G56280.2	ATDI19	-	T	C	0.0296134	445	6.1399	2.61886e-93
1_608073	AT1G02780	AT1G02780.1	RPL19A	-	T	C	0.021066	364	5.30772	6.20841e-93
5_25665151	AT5G64130	AT5G64130.1,AT5G64130.3,AT5G64130.2	AT5G64130	-	T	C	0.037827	360	4.88282	1.06499e-92
3_19690435	AT3G53110	AT3G53110.1	RH38	+	A	G	0.245234	283	8.60626	1.17957e-92
1_3155332	AT1G09740	AT1G09740.2,AT1G09740.1	AT1G09740	+	A	G	0.109822	653	4.34165	1.65227e-92
3_17649814	AT3G47833	AT3G47833.1	SDH7A	+	A	G	0.13236	290	7.56669	1.7838e-92
2_14531381	AT2G34470	AT2G34470.1,AT2G34470.2	UREG	-	T	C	0.124752	315	7.5285	2.34626e-92
3_22251333	AT3G60210	AT3G60210.1	AT3G60210	-	T	C	0.521298	257	18.3592	2.40494e-92
3_4592551	AT3G13920	AT3G13920.1,AT3G13920.3,AT3G13920.2,AT3G13920.5	TIF4A-1	-	T	C	0.0518344	397	5.04744	1.27074e-91
2_13438196	AT2G31570	AT2G31570.1	GPX2	-	T	C	0.086724	373	6.26995	1.37575e-91
1_2463255	AT1G07940	AT1G07940.1,AT1G07940.2,AT1G07940.4,AT1G07940.3	A3	-	T	C	0.0609113	393	5.98477	1.39137e-91
2_12960556	AT2G30410	AT2G30410.3,AT2G30410.2,AT2G30410.1	TFCA	+	A	G	0.298281	295	8.74834	1.4385e-91
5_24015704	AT5G59613	AT5G59613.2,AT5G59613.1	AT5G59613	-	T	C	0.0237904	325	6.5118	5.88431e-91
1_4946347	AT1G14450	AT1G14450.1,AT1G14450.2	AT1G14450	-	T	C	0.165796	254	17.5066	9.04568e-91
1_1189449	AT1G04410	AT1G04410.1	MDH1	-	T	C	0.0156911	319	17.6366	1.22344e-90
2_13885529	AT2G32730	AT2G32730.1	RPN2A	+	A	G	0.572368	261	18.677	1.79781e-90
3_3623681	AT3G11510	AT3G11510.1	RPS14B	-	T	C	0.0788167	365	4.57276	3.01115e-90
5_20155475	AT5G49650	AT5G49650.1,AT5G49650.2	XK-2	+	A	G	0.442464	273	5.47453	3.38797e-90
1_7020331	AT1G20260	AT1G20260.1	VHA-B3	+	A	G	0.136627	401	19.1041	4.56013e-90
2_12416299	AT2G28910	AT2G28910.1,AT2G28910.2,AT2G28910.3	CXIP4	-	T	C	0.0631616	358	5.44012	6.32141e-90
2_9237443	AT2G21580	AT2G21580.1,AT2G21580.2	RPS25B	+	A	G	0.0388915	334	5.93567	7.94915e-90
5_19137644	AT5G47120	AT5G47120.1	BI-1	+	A	G	0.124531	465	5.78846	8.35831e-90
1_5472184	AT1G15930	AT1G15930.2,AT1G15930.1	RPS12A	+	A	G	0.0382692	574	3.02334	1.03778e-89
5_10044140	AT5G28050	AT5G28050.1,AT5G28050.2,AT5G28050.3	AT5G28050	-	T	C	0.125272	288	6.52575	1.4992e-89
5_3923142	AT5G12140	AT5G12140.1	CYS1	-	T	C	0.569542	2760	3.32474	2.22904e-89
1_19855660	AT1G53240	AT1G53240.1	mMDH1	-	T	C	0.0429408	535	3.51031	3.8182e-89
5_6851966	AT5G20290	AT5G20290.1	RPS8A	-	T	C	0.0272249	606	2.99588	5.46327e-89
4_11792671	AT4G22310	AT4G22310.1	MPC4	+	A	G	0.141585	318	7.4962	6.88383e-89
1_3377049	AT1G10290	AT1G10290.1	DRP2A	+	A	G	0.288889	312	5.53273	1.6893e-88
4_1136987	AT4G02580	AT4G02580.1	AT4G02580	+	A	G	0.137194	308	17.0849	1.91943e-88
2_9237436	AT2G21580	AT2G21580.1,AT2G21580.2	RPS25B	+	A	G	0.0328154	302	6.86759	2.26198e-88
1_29803655	AT1G79230	AT1G79230.1,AT1G79230.3,AT1G79230.2	STR1	+	A	G	0.101235	287	18.6283	2.78868e-88
3_21196877	AT3G57290	AT3G57290.1	EIF3E	-	T	C	0.080764	296	17.6426	2.82348e-88
5_10070309	AT5G28060	AT5G28060.1	RPS24B	-	T	C	0.0396485	397	4.91851	2.99745e-88
2_18320159	AT2G44350	AT2G44350.1,AT2G44350.2,AT2G44350.4,AT2G44350.3	CSY4	+	A	G	0.0726033	362	5.7162	3.11419e-88
3_23433641	AT3G63460	AT3G63460.1,AT3G63460.2,AT3G63460.3	SEC31B	-	T	C	0.101227	363	4.94899	3.4525e-88
3_6998432	AT3G20050	AT3G20050.1	CCT1	-	T	C	0.178594	282	8.48879	4.23012e-88
4_16067956	AT4G33360	AT4G33360.1,AT4G33360.2	FLDH	-	T	C	0.180415	304	6.16997	5.15812e-88
5_7939338	AT5G23540	AT5G23540.1,AT5G23540.2	RPN11	+	A	G	0.165153	491	4.08407	6.40089e-88
3_17246758	AT3G46830	AT3G46830.1,AT3G46830.2	RABA2C	-	T	C	0.189474	270	8.4937	7.93403e-88
4_16403457	AT4G34265	AT4G34265.2,AT4G34265.1,AT4G34265.4,AT4G34265.6,AT4G34265.3	AT4G34265	+	A	G	0.166176	339	4.60982	9.38011e-88
2_8965049	AT2G20820	AT2G20820.1,AT2G20820.2	AT2G20820	+	A	G	0.190389	1977	3.22199	1.03564e-87
4_9773179	AT4G17520	AT4G17520.1	AT4G17520	+	A	G	0.0807339	352	6.47033	1.3108e-87
3_368581	AT3G02090	AT3G02090.1,AT3G02090.2	MPPBETA	+	A	G	0.627412	3154	3.57351	1.45661e-87
1_25393359	AT1G67730	AT1G67730.1	KCR1	+	A	G	0.226812	313	5.12327	3.38371e-87
4_1136967	AT4G02580	AT4G02580.1	AT4G02580	+	A	G	0.0987156	269	18.0257	5.13827e-87
4_16541728	AT4G34640	AT4G34640.1,AT4G34640.2	SQS1	+	A	G	0.244308	279	18.0635	5.46057e-87
5_14276083	AT5G36230	AT5G36230.1,AT5G36230.2	AT5G36230	+	A	G	0.0768863	322	5.50418	6.10472e-87
3_3909177	AT3G12260	AT3G12260.1	AT3G12260	-	T	C	0.137394	309	8.57254	1.32298e-86
4_16558573	AT4G34700	AT4G34700.1	CIB22	+	A	G	0.036258	312	18.3828	1.69385e-86
2_9071668	AT2G21170	AT2G21170.1,AT2G21170.2,AT2G21170.3	TIM	-	T	C	0.122454	475	3.08308	1.97348e-86
2_8965048	AT2G20820	AT2G20820.1,AT2G20820.2	AT2G20820	+	A	G	0.0389462	408	7.57524	5.21479e-86
3_3673945	AT3G11630	AT3G11630.1	BAS1	+	A	G	0.283992	424	6.60839	6.48949e-86
3_19652191	AT3G52990	AT3G52990.1,AT3G52990.2	AT3G52990	+	A	G	0.105279	351	6.15292	2.70668e-85
1_29206970	AT1G77710	AT1G77710.1	AT1G77710	+	A	G	0.0598169	294	6.831	2.86497e-85
5_23208766	AT5G57300	AT5G57300.1,AT5G57300.3,AT5G57300.2,AT5G57300.4	COQ5	-	T	C	0.347879	287	6.21071	3.99774e-85
1_5711825	AT1G16700	AT1G16700.1	AT1G16700	+	A	G	0.21128	236	17.9273	5.18532e-85
1_10831883	AT1G30580	AT1G30580.1	AT1G30580	-	T	C	0.147872	396	7.54175	7.65342e-85
4_16339582	AT4G34110	AT4G34110.1	PAB2	+	A	G	0.0428328	453	4.27068	8.89049e-85
4_16337904	AT4G34110	AT4G34110.1	PAB2	+	A	G	0.0537842	307	5.34146	1.41753e-84
5_26959351	AT5G67590	AT5G67590.1	FRO1	+	A	G	0.0779703	315	6.76389	1.63485e-84
2_133050	AT2G01250	AT2G01250.1,AT2G01250.2	RPL7B	-	T	C	0.0975823	892	3.17572	2.73075e-84
1_15651618	AT1G41880	AT1G41880.1,AT1G41880.2	RPL35AB	-	T	C	0.0530372	351	4.79709	6.38922e-84
5_16609873	AT5G41520	AT5G41520.1,AT5G41520.2	RPS10B	-	T	C	0.048971	464	4.79999	7.0698e-84
1_21073158	AT1G56280	AT1G56280.1,AT1G56280.2	ATDI19	-	T	C	0.0441567	283	6.85704	9.11519e-84
5_12591386	AT5G33320	AT5G33320.1	PPT1	+	A	G	0.0677427	277	7.36696	1.19801e-83
1_2637109	AT1G08360	AT1G08360.1	RPL10AA	+	A	G	0.043024	383	4.08245	2.56147e-83
4_18214550	AT4G39080	AT4G39080.1	VHA-A3	+	A	G	0.115385	441	4.73064	3.12821e-83
1_1056203	AT1G04080	AT1G04080.1,AT1G04080.3,AT1G04080.2,AT1G04080.5,AT1G04080.4	PRP39	+	A	G	0.38285	317	5.77049	3.41056e-83
3_6929294	AT3G19910	AT3G19910.1	BBR	+	A	G	0.269809	269	7.45162	3.56628e-83
3_4911932	AT3G14600	AT3G14600.1	RPL18AC	+	A	G	0.0741384	256	18.5745	6.06914e-83
3_3673986	AT3G11630	AT3G11630.1	BAS1	+	A	G	0.202643	230	17.8361	8.06194e-83
2_11049823	AT2G25910	AT2G25910.1,AT2G25910.2	AT2G25910	-	T	C	0.0907672	349	5.62295	8.46623e-83
1_17463066	AT1G47550	AT1G47550.1,AT1G47550.2	SEC3A	+	A	G	0.552036	366	3.04761	9.86036e-83
2_9071030	AT2G21170	AT2G21170.1,AT2G21170.2,AT2G21170.3	TIM	-	T	C	0.0878113	268	7.36519	1.41887e-82
3_17779444	AT3G48140	AT3G48140.1	T24C20_20	+	A	G	0.0398488	253	17.2143	1.50073e-82
3_4433870	AT3G13580	AT3G13580.1,AT3G13580.2,AT3G13580.9,AT3G13580.3,AT3G13580.7,AT3G13580.8,AT3G13580.6,AT3G13580.5,AT3G13580.4	RPL7D	+	A	G	0.0842637	317	8.40176	2.13147e-82
3_22339089	AT3G60440	AT3G60440.1,AT3G60440.2	AT3G60440	+	A	G	0.408805	325	3.87271	3.06523e-82
1_30007955	AT1G79750	AT1G79750.1	NADP-ME4	-	T	C	0.0897206	350	4.44831	5.48328e-82
4_13594140	AT4G27090	AT4G27090.1	RPL14B	-	T	C	0.0226083	337	7.42463	5.48328e-82
3_19710679	AT3G53180	AT3G53180.1	AT3G53180	+	A	G	0.254415	389	3.55752	6.24461e-82
2_12769178	AT2G29960	AT2G29960.3,AT2G29960.1,AT2G29960.2	CYP19-4	-	T	C	0.164541	258	7.37419	6.36471e-82
4_18214159	AT4G39080	AT4G39080.1	VHA-A3	+	A	G	0.101413	323	6.88572	7.90897e-82
5_3258877	AT5G10360	AT5G10360.1,AT5G10360.2	RPS6B	-	T	C	0.0379565	370	4.43175	8.29607e-82
4_16338526	AT4G34110	AT4G34110.1	PAB2	+	A	G	0.0357715	335	6.09371	1.10386e-81
1_9485603	AT1G27310	AT1G27310.1	NTF2A	-	T	C	0.0459806	298	5.6031	1.41148e-81
4_16339580	AT4G34110	AT4G34110.1	PAB2	+	A	G	0.032345	336	6.74848	3.3493e-81
4_6174628	AT4G09800	AT4G09800.1	RPS18A	+	A	G	0.034254	315	5.84696	4.15054e-81
5_22350515	AT5G55070	AT5G55070.1	AT5G55070	+	A	G	0.178526	281	6.75614	5.22444e-81
1_26127370	AT1G69510	AT1G69510.1,AT1G69510.3,AT1G69510.2	AT1G69510	+	A	G	0.0592644	340	6.84419	5.73395e-81
1_6913508	AT1G19910	AT1G19910.1,AT1G19910.2	VHA-C2	+	A	G	0.0225664	338	5.61728	6.1963e-81
5_23725903	AT5G58740	AT5G58740.1	AT5G58740	-	T	C	0.176975	289	7.38942	6.30426e-81
4_251088	AT4G00585	AT4G00585.1	AT4G00585	-	T	C	0.156499	236	17.9434	6.41923e-81
1_1141982	AT1G04270	AT1G04270.1,AT1G04270.2	RPS15A	-	T	C	0.0698723	930	3.09224	8.66043e-81
2_12416212	AT2G28910	AT2G28910.1,AT2G28910.2,AT2G28910.3	CXIP4	-	T	C	0.0424281	267	8.31562	8.98838e-81
1_3136657	AT1G09690	AT1G09690.1	RPL21A	-	T	C	0.012699	288	7.32422	9.65205e-81
4_14473292	AT4G29430	AT4G29430.1	RPS15AE	+	A	G	0.261448	354	3.88396	1.19187e-80
4_13520303	AT4G26910	AT4G26910.2,AT4G26910.1,AT4G26910.3	AT4G26910	-	T	C	0.119854	393	5.11042	1.58885e-80
2_14177256	AT2G33470	AT2G33470.2,AT2G33470.1	GLTP1	-	T	C	0.200235	681	2.93478	2.71543e-80
5_6786501	AT5G20080	AT5G20080.1	CBR2	+	A	G	0.11236	270	18.7149	6.89086e-80
1_2463408	AT1G07940	AT1G07940.1,AT1G07940.2,AT1G07940.4,AT1G07940.3	A3	-	T	C	0.0378721	299	5.23538	9.23166e-80
5_1417648	AT5G04870	AT5G04870.1	CPK1	-	T	C	0.27667	319	4.04071	9.23166e-80
5_16315427	AT5G40770	AT5G40770.1	PHB3	-	T	C	0.239763	445	6.84233	2.0751e-79
3_16909561	AT3G46010	AT3G46010.1,AT3G46010.2	ADF1	-	T	C	0.177747	254	7.33638	8.66599e-79
5_3298034	AT5G10480	AT5G10480.1,AT5G10480.2,AT5G10480.3	PAS2	-	T	C	0.277491	376	4.64237	8.83657e-79
2_13438199	AT2G31570	AT2G31570.1	GPX2	-	T	C	0.0623312	277	6.30555	8.87624e-79
4_16841779	AT4G35450	AT4G35450.1,AT4G35450.3,AT4G35450.2,AT4G35450.4,AT4G35450.5	AKR2	+	A	G	0.121676	302	6.76632	9.92077e-79
1_5495102	AT1G16000	AT1G16000.1	AT1G16000	+	A	G	0.086407	335	5.33051	1.05255e-78
5_20693033	AT5G50850	AT5G50850.1	PDH2	+	A	G	0.0488527	264	16.8509	1.38555e-78
3_4433855	AT3G13580	AT3G13580.1,AT3G13580.2,AT3G13580.9,AT3G13580.3,AT3G13580.7,AT3G13580.8,AT3G13580.6,AT3G13580.5,AT3G13580.4	RPL7D	+	A	G	0.131242	431	6.33328	1.65794e-78
3_17650479	AT3G47836	AT3G47836.1,AT3G47836.2	AT3G47836	-	T	C	0.163821	403	5.81602	1.77462e-78
2_8843746	AT2G20530	AT2G20530.1,AT2G20530.2	PHB6	+	A	G	0.200612	328	4.2372	2.72512e-78
4_9917958	AT4G17830	AT4G17830.1,AT4G17830.2	AT4G17830	+	A	G	0.485564	370	4.93298	2.85558e-78
4_8198251	AT4G14220	AT4G14220.1	RHF1A	+	A	G	0.526923	274	4.85041	3.40723e-78
5_3259311	AT5G10360	AT5G10360.1,AT5G10360.2	RPS6B	-	T	C	0.014484	310	6.02085	3.44319e-78
4_6174588	AT4G09800	AT4G09800.1	RPS18A	+	A	G	0.0748173	645	3.38851	5.6813e-78
5_5361033	AT5G16390	AT5G16390.1,AT5G16390.2	BCCP1	-	T	C	0.301484	325	6.0726	7.31327e-78
4_11161189	AT4G20850	AT4G20850.1	TPP2	-	T	C	0.19699	733	3.79188	1.36906e-77
2_16585982	AT2G39760	AT2G39760.1,AT2G39760.3	BPM3	+	A	G	0.585427	233	6.3569	1.50749e-77
1_3159370	AT1G09760	AT1G09760.1	U2A'	-	T	C	0.206016	226	17.8059	1.96258e-77
4_7993399	AT4G13780	AT4G13780.1	AT4G13780	-	T	C	0.266114	289	6.33208	2.67423e-77
1_5472700	AT1G15930	AT1G15930.2,AT1G15930.1	RPS12A	+	A	G	0.0278812	262	7.23888	3.77687e-77
1_21073670	AT1G56280	AT1G56280.1,AT1G56280.2	ATDI19	-	T	C	0.0239156	365	3.88956	4.94615e-77
1_29916545	AT1G79530	AT1G79530.1	GAPCP1	-	T	C	0.0574847	442	4.66235	6.06374e-77
1_2439527	AT1G07890	AT1G07890.1,AT1G07890.3,AT1G07890.2,AT1G07890.8,AT1G07890.4,AT1G07890.6,AT1G07890.7,AT1G07890.5	APX1	+	A	G	0.0315604	359	6.79235	7.09396e-77
5_10069771	AT5G28060	AT5G28060.1	RPS24B	-	T	C	0.0343342	263	6.6719	7.80966e-77
5_16676112	AT5G41700	AT5G41700.1,AT5G41700.5,AT5G41700.3,AT5G41700.2,AT5G41700.4	UBC8	+	A	G	0.100531	758	4.16209	7.87592e-77
1_21144198	AT1G56450	AT1G56450.1	PBG1	+	A	G	0.114017	279	8.2379	9.49916e-77
1_24248976	AT1G65290	AT1G65290.1	MTACP2	-	T	C	0.0657961	262	7.23433	1.26623e-76
4_18072254	AT4G38680	AT4G38680.1	CSP2	-	T	C	0.0390648	391	3.47696	1.84275e-76
1_21380173	AT1G57720	AT1G57720.1,AT1G57720.2	AT1G57720	+	A	G	0.0771989	323	4.28511	2.73865e-76
5_5406690	AT5G16550	AT5G16550.1	AT5G16550	+	A	G	0.483763	432	3.17844	4.08111e-76
1_9172518	AT1G26550	AT1G26550.1	AT1G26550	+	A	G	0.0370954	306	18.8902	4.13888e-76
1_23972073	AT1G64550	AT1G64550.1	ABCF3	+	A	G	0.21015	294	4.67589	5.65461e-76
4_16339245	AT4G34110	AT4G34110.1	PAB2	+	A	G	0.0296539	299	4.9125	5.65989e-76
1_27540795	AT1G73230	AT1G73230.1	AT1G73230	-	T	C	0.061754	476	2.76903	5.76544e-76
1_21073789	AT1G56280	AT1G56280.1,AT1G56280.2	ATDI19	-	T	C	0.0231306	391	4.9461	5.97672e-76
5_20693034	AT5G50850	AT5G50850.1	PDH2	+	A	G	0.0598416	325	6.68923	7.74615e-76
5_7087043	AT5G20890	AT5G20890.1	CCT2	-	T	C	0.183401	727	3.70133	8.0585e-76
2_2588745	AT2G06530	AT2G06530.1,AT2G06530.2	VPS2.1	-	T	C	0.170923	261	7.23698	1.09152e-75
3_1622626	AT3G05590	AT3G05590.1,AT3G05590.2,AT3G05590.3	RPL18B	+	A	G	0.0233012	370	4.01995	1.3643e-75
2_11050781	AT2G25910	AT2G25910.1,AT2G25910.2	AT2G25910	-	T	C	0.145657	327	4.47404	1.40398e-75
2_9071661	AT2G21170	AT2G21170.1,AT2G21170.2,AT2G21170.3	TIM	-	T	C	0.0745614	289	4.81037	1.72899e-75
4_16369979	AT4G34180	AT4G34180.1	AT4G34180	-	T	C	0.0666667	241	16.5115	3.11635e-75
2_12416603	AT2G28910	AT2G28910.1,AT2G28910.2,AT2G28910.3	CXIP4	-	T	C	0.0871269	289	4.89381	3.484e-75
4_18011294	AT4G38510	AT4G38510.2,AT4G38510.3,AT4G38510.4,AT4G38510.5,AT4G38510.1	VHA-B2	-	T	C	0.0703351	340	5.19904	3.53193e-75
3_23228234	AT3G62810	AT3G62810.1	AT3G62810	+	A	G	0.215331	368	4.34643	3.68482e-75
4_12974356	AT4G25370	AT4G25370.1	AT4G25370	+	A	G	0.210824	335	4.55109	5.14102e-75
3_18314841	AT3G49390	AT3G49390.1,AT3G49390.2,AT3G49390.3	CID10	-	T	C	0.195668	271	16.7029	6.73773e-75
1_18236714	AT1G49300	AT1G49300.1,AT1G49300.2	RABG3E	+	A	G	0.0956386	307	7.33101	7.42858e-75
5_19789404	AT5G48810	AT5G48810.1	CYTB5-D	-	T	C	0.0307464	269	6.65005	7.51728e-75
4_10303207	AT4G18730	AT4G18730.1	RPL11B	+	A	G	0.087619	276	5.46279	1.91495e-74
2_7478114	AT2G17190	AT2G17190.1	DSK2A	-	T	C	0.231898	237	18.5789	2.01845e-74
2_9504965	AT2G22400	AT2G22400.1	AT2G22400	-	T	C	0.427239	229	6.27936	2.51154e-74
4_16337238	AT4G34110	AT4G34110.1	PAB2	+	A	G	0.0320023	331	4.41892	3.65801e-74
5_23271426	AT5G57440	AT5G57440.1	GPP2	-	T	C	0.518779	221	5.35086	4.30729e-74
1_1216367	AT1G04480	AT1G04480.1	RPL23C	+	A	G	0.0207713	335	4.08815	4.50198e-74
4_16337869	AT4G34110	AT4G34110.1	PAB2	+	A	G	0.0546355	320	6.71994	4.89006e-74
5_19092053	AT5G47030	AT5G47030.1	AT5G47030	+	A	G	0.0637931	296	4.7683	5.93475e-74
1_539818	AT1G02560	AT1G02560.1	CLPP5	+	A	G	0.247191	242	8.36168	6.16078e-74
1_1189419	AT1G04410	AT1G04410.1	MDH1	-	T	C	0.0139527	252	18.913	1.2479e-73
3_20562793	AT3G55460	AT3G55460.1	SCL30	+	A	G	0.0722924	269	5.88155	1.2479e-73
3_4911271	AT3G14600	AT3G14600.1	RPL18AC	+	A	G	0.0493683	422	3.66224	1.39276e-73
3_17638926	AT3G47810	AT3G47810.3,AT3G47810.1,AT3G47810.2	VPS29	-	T	C	0.124082	693	3.4495	2.15542e-73
2_16181256	AT2G38700	AT2G38700.1	MVD1	-	T	C	0.10737	287	5.06853	2.34096e-73
3_22285397	AT3G60300	AT3G60300.1,AT3G60300.2	AT3G60300	+	A	G	0.294624	274	4.25506	2.36927e-73
4_17788283	AT4G37830	AT4G37830.1,AT4G37830.3,AT4G37830.2	COX6A	-	T	C	0.0233516	374	3.99044	2.82964e-73
1_15651620	AT1G41880	AT1G41880.1,AT1G41880.2	RPL35AB	-	T	C	0.124383	807	3.26055	3.629e-73
4_12884597	AT4G25100	AT4G25100.2,AT4G25100.5,AT4G25100.3,AT4G25100.1,AT4G25100.4	FSD1	-	T	C	0.0210395	270	5.90867	6.80411e-73
2_14176584	AT2G33470	AT2G33470.2,AT2G33470.1	GLTP1	-	T	C	0.0992765	247	7.14698	7.93932e-73
4_11266723	AT4G21105	AT4G21105.1,AT4G21105.3	AT4G21105	+	A	G	0.028972	310	18.566	1.03506e-72
4_13554794	AT4G27000	AT4G27000.1	RBP45C	-	T	C	0.611285	585	3.60186	1.40461e-72
1_10640037	AT1G30230	AT1G30230.1,AT1G30230.2	AT1G30230	+	A	G	0.0294313	310	4.58266	1.42882e-72
5_16676103	AT5G41700	AT5G41700.1,AT5G41700.5,AT5G41700.3,AT5G41700.2,AT5G41700.4	UBC8	+	A	G	0.237993	1660	2.61345	1.60187e-72
5_6785621	AT5G20080	AT5G20080.1	CBR2	+	A	G	0.0963288	307	5.43889	1.82899e-72
1_313521	AT1G01910	AT1G01910.2,AT1G01910.5,AT1G01910.3	AT1G01910	-	T	C	0.41037	277	4.19145	1.83924e-72
1_7020172	AT1G20260	AT1G20260.1	VHA-B3	+	A	G	0.0600296	243	5.90585	2.89821e-72
1_29206973	AT1G77710	AT1G77710.1	AT1G77710	+	A	G	0.06578	366	7.33369	3.789e-72
1_8685869	AT1G24510	AT1G24510.1,AT1G24510.2,AT1G24510.3	CCT5	-	T	C	0.0709645	426	3.58128	3.81764e-72
4_12677986	AT4G24550	AT4G24550.2,AT4G24550.3,AT4G24550.1	AP4M	+	A	G	0.156965	302	3.37128	3.95858e-72
2_8864421	AT2G20580	AT2G20580.1	RPN1A	+	A	G	0.12266	321	3.73374	6.03909e-72
5_6764242	AT5G20020	AT5G20020.1	RAN2	+	A	G	0.0294778	289	5.22559	7.67245e-72
5_9781225	AT5G27640	AT5G27640.1,AT5G27640.2,AT5G27640.3	TIF3B1	-	T	C	0.224846	219	8.24579	7.99691e-72
3_368539	AT3G02090	AT3G02090.1,AT3G02090.2	MPPBETA	+	A	G	0.0485756	266	4.85872	1.28622e-71
1_10639979	AT1G30230	AT1G30230.1,AT1G30230.2	AT1G30230	+	A	G	0.0207125	250	5.89187	1.59488e-71
1_21073904	AT1G56280	AT1G56280.1,AT1G56280.2	ATDI19	-	T	C	0.0179606	279	18.9491	1.84874e-71
5_2669734	AT5G08300	AT5G08300.1	AT5G08300	+	A	G	0.135427	263	8.20617	2.14866e-71
4_14771021	AT4G30190	AT4G30190.1,AT4G30190.2	AHA2	-	T	C	0.0175266	303	4.82518	2.22053e-71
4_10505001	AT4G19210	AT4G19210.1	ABCE2	+	A	G	0.179575	262	6.61742	2.4638e-71
1_1315399	AT1G04690	AT1G04690.1	KAB1	+	A	G	0.147099	218	17.7929	2.49248e-71
1_8889467	AT1G25350	AT1G25350.1,AT1G25350.2	OVA9	-	T	C	0.320043	297	4.63275	3.23449e-71
1_10182557	AT1G29150	AT1G29150.1,AT1G29150.2	RPN6	+	A	G	0.222543	231	8.16472	4.21545e-71
2_11783732	AT2G27600	AT2G27600.1	SKD1	+	A	G	0.180587	240	17.5588	5.47828e-71
5_23727237	AT5G58740	AT5G58740.1	AT5G58740	-	T	C	0.104315	469	4.45532	5.83112e-71
1_12024490	AT1G33140	AT1G33140.1	RPL9B	+	A	G	0.0236128	260	6.14727	6.51453e-71
5_20104729	AT5G49540	AT5G49540.1,AT5G49540.2	AT5G49540	-	T	C	0.269053	233	16.7731	9.84066e-71
4_16336786	AT4G34110	AT4G34110.1	PAB2	+	A	G	0.0365765	353	4.32289	1.33081e-70
2_9071018	AT2G21170	AT2G21170.1,AT2G21170.2,AT2G21170.3	TIM	-	T	C	0.0865103	236	6.56249	1.36695e-70
1_3537776	AT1G10670	AT1G10670.1,AT1G10670.2,AT1G10670.4,AT1G10670.3	ACLA-1	+	A	G	0.0503182	340	3.89404	1.7433e-70
4_8198253	AT4G14220	AT4G14220.1	RHF1A	+	A	G	0.423301	218	8.23018	2.50015e-70
1_10831808	AT1G30580	AT1G30580.1	AT1G30580	-	T	C	0.166787	231	7.21629	2.60835e-70
5_16342435	AT5G40810	AT5G40810.1,AT5G40810.2	CYC12	+	A	G	0.141116	220	17.6704	3.51658e-70
4_16338513	AT4G34110	AT4G34110.1	PAB2	+	A	G	0.0313192	297	4.47815	3.54926e-70
1_1216452	AT1G04480	AT1G04480.1	RPL23C	+	A	G	0.0314157	480	4.05116	4.1807e-70
1_5495137	AT1G16000	AT1G16000.1	AT1G16000	+	A	G	0.101273	342	4.56498	5.33053e-70
3_23037596	AT3G62250	AT3G62250.1	RPS27AC	+	A	G	0.0276627	287	4.50784	6.10556e-70
3_5890325	AT3G17240	AT3G17240.1,AT3G17240.3	LPD2	-	T	C	0.065686	259	7.09254	7.27081e-70
5_19406359	AT5G47930	AT5G47930.1	RPS27D	-	T	C	0.0524082	247	5.82668	8.6972e-70
4_14562921	AT4G29735	AT4G29735.1,AT4G29735.2	AT4G29735	-	T	C	0.13109	226	8.08775	1.01603e-69
2_17188384	AT2G41220	AT2G41220.1	GLU2	+	A	G	0.138557	336	8.2665	1.04507e-69
5_25394785	AT5G63400	AT5G63400.1,AT5G63400.2	ADK1	-	T	C	0.0757202	276	4.67447	1.05737e-69
5_16230865	AT5G40510	AT5G40510.1,AT5G40510.2	AT5G40510	+	A	G	0.177165	270	17.3673	1.24533e-69
2_9945547	AT2G23350	AT2G23350.1	PAB4	+	A	G	0.0839809	335	3.95787	1.34904e-69
4_13554762	AT4G27000	AT4G27000.1	RBP45C	-	T	C	0.276204	195	8.40938	1.40675e-69
4_2440850	AT4G04800	AT4G04800.1	MSRB3	+	A	G	0.162191	308	4.40993	2.26054e-69
4_13594277	AT4G27090	AT4G27090.1	RPL14B	-	T	C	0.0532186	1002	4.13499	2.41854e-69
5_588309	AT5G02610	AT5G02610.1,AT5G02610.2	RPL35D	+	A	G	0.0495101	384	4.30414	2.54409e-69
1_9562839	AT1G27530	AT1G27530.1	AT1G27530	-	T	C	0.0846373	238	8.13236	2.56089e-69
5_4530975	AT5G14040	AT5G14040.1	MPT3	-	T	C	0.0376026	229	8.05747	3.24681e-69
4_15159321	AT4G31180	AT4G31180.1,AT4G31180.2	AT4G31180	+	A	G	0.24026	407	5.59406	3.30539e-69
1_27109405	AT1G72020	AT1G72020.1	AT1G72020	-	T	C	0.0568731	247	8.13958	3.8193e-69
5_6764174	AT5G20020	AT5G20020.1	RAN2	+	A	G	0.023358	271	5.53864	3.875e-69
5_2203878	AT5G07090	AT5G07090.1,AT5G07090.2,AT5G07090.3	RPS4B	+	A	G	0.0428399	248	7.1097	4.72313e-69
2_12826358	AT2G30050	AT2G30050.1	SEC13B	+	A	G	0.174026	402	3.79161	5.51034e-69
5_3792529	AT5G11770	AT5G11770.1	AT5G11770	-	T	C	0.0297117	271	5.17871	7.46655e-69
1_18065268	AT1G48850	AT1G48850.1,AT1G48850.3,AT1G48850.2	EMB1144	-	T	C	0.101004	332	4.30543	9.48392e-69
4_18012293	AT4G38510	AT4G38510.2,AT4G38510.3,AT4G38510.4,AT4G38510.5,AT4G38510.1	VHA-B2	-	T	C	0.190955	532	2.48264	1.06405e-68
1_19884648	AT1G53310	AT1G53310.2,AT1G53310.1,AT1G53310.3	PPC1	-	T	C	0.116908	363	3.25979	1.52521e-68
5_20342749	AT5G50000	AT5G50000.1,AT5G50000.2	AT5G50000	-	T	C	0.510246	249	4.33042	1.89404e-68
3_2917852	AT3G09500	AT3G09500.1	RPL35A	+	A	G	0.0279036	228	6.52932	2.00844e-68
4_16370110	AT4G34180	AT4G34180.1	AT4G34180	-	T	C	0.0444182	226	8.06724	2.12808e-68
5_24016509	AT5G59613	AT5G59613.2	AT5G59613	-	T	C	0.0304058	251	5.77886	4.38966e-68
4_7010046	AT4G11600	AT4G11600.1	GPX6	-	T	C	0.0298676	397	5.47291	5.95222e-68
3_368540	AT3G02090	AT3G02090.1,AT3G02090.2	MPPBETA	+	A	G	0.0417063	219	6.51992	6.19414e-68
3_16472003	AT3G45030	AT3G45030.1	RPS20A	-	T	C	0.0362509	263	6.30517	6.40732e-68
3_2615654	AT3G08610	AT3G08610.1	AT3G08610	-	T	C	0.030792	229	8.0302	8.13552e-68
1_12024492	AT1G33140	AT1G33140.1	RPL9B	+	A	G	0.0255893	279	7.08936	9.7022e-68
4_16336936	AT4G34110	AT4G34110.1	PAB2	+	A	G	0.0473766	549	3.56386	1.45713e-67
5_4978633	AT5G15320	AT5G15320.1,AT5G15320.2	AT5G15320	+	A	G	0.0555556	328	6.41264	2.18287e-67
3_19397837	AT3G52300	AT3G52300.1,AT3G52300.2	ATPQ	+	A	G	0.0195563	268	5.17884	2.57328e-67
5_22349731	AT5G55070	AT5G55070.1,AT5G55070.2	AT5G55070	+	A	G	0.139246	347	3.64554	2.78121e-67
4_37342	AT4G00100	AT4G00100.1	RPS13B	+	A	G	0.0256754	364	3.41363	3.46369e-67
5_17461452	AT5G43460	AT5G43460.2,AT5G43460.1	AT5G43460	+	A	G	0.313371	832	3.27432	3.60463e-67
1_11410985	AT1G31812	AT1G31812.1	ACBP6	-	T	C	0.107342	212	8.06474	4.96334e-67
1_10640152	AT1G30230	AT1G30230.1,AT1G30230.2	AT1G30230	+	A	G	0.0267259	319	5.61652	5.30254e-67
2_17355782	AT2G41630	AT2G41630.1	TFIIB1	-	T	C	0.227343	296	3.84943	5.78725e-67
1_4003181	AT1G11860	AT1G11860.2,AT1G11860.1,AT1G11860.3	GDCST	+	A	G	0.0615923	229	5.78394	7.14192e-67
2_12852642	AT2G30110	AT2G30110.1	UBA1	-	T	C	0.11064	235	6.44183	1.26258e-66
4_13554905	AT4G27000	AT4G27000.1	RBP45C	-	T	C	0.0979284	260	8.20046	1.66632e-66
5_25749759	AT5G64400	AT5G64400.1,AT5G64400.2,AT5G64400.3	AT5G64400	+	A	G	0.0158567	216	19.0822	2.20572e-66
1_21030900	AT1G56200	AT1G56200.1,AT1G56200.2	emb1303	+	A	G	0.0607735	308	7.14976	2.91868e-66
2_12416237	AT2G28910	AT2G28910.1,AT2G28910.2,AT2G28910.3	CXIP4	-	T	C	0.0470091	345	4.33306	3.62255e-66
2_2236106	AT2G05840	AT2G05840.1,AT2G05840.3,AT2G05840.2	PAA2	+	A	G	0.142857	310	4.37368	4.25499e-66
5_24016177	AT5G59613	AT5G59613.2,AT5G59613.1	AT5G59613	-	T	C	0.379284	5533	3.8363	4.58867e-66
5_22730835	AT5G56150	AT5G56150.1,AT5G56150.2	UBC30	+	A	G	0.184483	535	3.90757	5.3444e-66
4_8424912	AT4G14710	AT4G14710.2,AT4G14710.1,AT4G14710.6,AT4G14710.4,AT4G14710.3,AT4G14710.5	ARD3	-	T	C	0.0888669	269	7.1653	5.66616e-66
3_9672981	AT3G26430	AT3G26430.1	AT3G26430	+	A	G	0.0665647	261	4.94111	1.34833e-65
3_1362228	AT3G04920	AT3G04920.1,AT3G04920.2	RPS24A	+	A	G	0.127871	245	5.27511	1.55049e-65
5_13109825	AT5G34850	AT5G34850.1	PAP26	-	T	C	0.0414547	326	3.71696	2.13354e-65
3_2615653	AT3G08610	AT3G08610.1	AT3G08610	-	T	C	0.0405441	304	5.83797	2.13926e-65
5_9874290	AT5G27850	AT5G27850.2,AT5G27850.1	RPL18C	+	A	G	0.0335479	271	4.5903	2.53023e-65
3_19369525	AT3G52220	AT3G52220.1	AT3G52220	-	T	C	0.628623	347	2.50674	3.01285e-65
1_20390865	AT1G54580	AT1G54580.1	ACP2	+	A	G	0.0584879	246	6.00505	3.36769e-65
5_6943667	AT5G20520	AT5G20520.1	WAV2	-	T	C	0.235945	277	4.14293	3.37886e-65
4_251065	AT4G00585	AT4G00585.1	AT4G00585	-	T	C	0.174791	251	17.5225	4.36312e-65
2_17188360	AT2G41220	AT2G41220.1	GLU2	+	A	G	0.10281	289	6.46783	5.13448e-65
5_2828494	AT5G08690	AT5G08690.1	AT5G08690	+	A	G	0.0650836	222	6.44336	5.24793e-65
4_627833	AT4G01480	AT4G01480.1,AT4G01480.2	PPA5	+	A	G	0.0845238	213	7.97792	5.38904e-65
1_22143939	AT1G60070	AT1G60070.1,AT1G60070.2	AT1G60070	-	T	C	0.359615	374	4.84122	8.66468e-65
3_23433336	AT3G63460	AT3G63460.1,AT3G63460.2,AT3G63460.3	SEC31B	-	T	C	0.0977011	306	4.20189	8.85405e-65
4_16370566	AT4G34180	AT4G34180.1	AT4G34180	-	T	C	0.0464588	225	6.02943	9.39405e-65
5_4447634	AT5G13780	AT5G13780.1	AT5G13780	-	T	C	0.0758877	265	4.57309	1.28312e-64
1_9533929	AT1G27450	AT1G27450.4,AT1G27450.1,AT1G27450.2,AT1G27450.3	APT1	+	A	G	0.0688246	219	6.03414	1.42827e-64
4_14403281	AT4G29210	AT4G29210.1,AT4G29210.2	GGT3	+	A	G	0.40099	243	3.98772	1.52153e-64
1_9527853	AT1G27435	AT1G27435.1	AT1G27435	-	T	C	0.0939685	215	6.0431	1.59883e-64
1_25236606	AT1G67350	AT1G67350.1,AT1G67350.2	AT1G67350	+	A	G	0.0320099	233	6.39929	1.85892e-64
2_18244694	AT2G44100	AT2G44100.1,AT2G44100.2	GDI1	+	A	G	0.105186	430	4.70907	2.24605e-64
3_20337672	AT3G54880	AT3G54880.1	AT3G54880	-	T	C	0.101043	281	4.72135	2.34874e-64
4_17825357	AT4G37910	AT4G37910.1,AT4G37910.2	HSP70-9	-	T	C	0.106429	293	5.4151	3.00519e-64
1_5472740	AT1G15930	AT1G15930.2,AT1G15930.1	RPS12A	+	A	G	0.0416571	361	5.7239	3.70251e-64
4_7864646	AT4G13520	AT4G13520.1,AT4G13520.2	SMAP1	+	A	G	0.0636646	246	4.93929	3.77603e-64
4_16558645	AT4G34700	AT4G34700.1	CIB22	+	A	G	0.0422125	232	7.89693	4.47863e-64
2_19345038	AT2G47110	AT2G47110.1,AT2G47110.2	RPS27AB	+	A	G	0.0277073	382	3.02124	4.72539e-64
5_1856538	AT5G06140	AT5G06140.1	SNX1	-	T	C	0.253093	225	4.84276	4.72601e-64
5_20155476	AT5G49650	AT5G49650.1,AT5G49650.2	XK-2	+	A	G	0.317817	198	6.1021	5.43028e-64
3_20562602	AT3G55460	AT3G55460.1	SCL30	+	A	G	0.0577208	234	6.00233	5.56538e-64
3_9991576	AT3G27090	AT3G27090.1,AT3G27090.3,AT3G27090.2	AT3G27090	+	A	G	0.11032	217	6.96801	5.79217e-64
2_7566383	AT2G17420	AT2G17420.1,AT2G17420.2	NTRA	+	A	G	0.0742127	238	7.08479	6.17992e-64
1_28528471	AT1G76010	AT1G76010.1,AT1G76010.2	AT1G76010	-	T	C	0.0455308	217	6.40836	6.39659e-64
1_18218085	AT1G49240	AT1G49240.1	ACT8	+	A	G	0.0309486	215	6.06212	6.6057e-64
4_14800572	AT4G30210	AT4G30210.2,AT4G30210.3,AT4G30210.1	ATR2	+	A	G	0.104156	208	7.97843	7.37436e-64
4_12551926	AT4G24190	AT4G24190.1,AT4G24190.2	SHD	-	T	C	0.100893	384	6.051	7.7476e-64
5_2870379	AT5G09225	AT5G09225.1	AT5G09225	-	T	C	0.368742	302	3.10673	8.3488e-64
1_21356131	AT1G57660	AT1G57660.1	RPL21F	+	A	G	0.0275625	313	3.67977	9.21445e-64
1_22053667	AT1G59900	AT1G59900.1	E1 ALPHA	+	A	G	0.0990291	204	7.00036	9.36996e-64
3_2411444	AT3G07560	AT3G07560.1	PEX13	-	T	C	0.20332	196	18.3498	9.75334e-64
1_8080258	AT1G22840	AT1G22840.1,AT1G22840.2	CYTC-1	+	A	G	0.023619	245	5.08122	1.40519e-63
5_4310549	AT5G13450	AT5G13450.1,AT5G13450.2	ATP5	-	T	C	0.0410018	406	5.25995	1.50226e-63
3_1622699	AT3G05590	AT3G05590.1,AT3G05590.2,AT3G05590.3	RPL18B	+	A	G	0.0345398	480	4.50975	1.5073e-63
2_8515891	AT2G19750	AT2G19750.1	RPS30C	+	A	G	0.0627284	206	7.95327	1.83982e-63
1_25236082	AT1G67350	AT1G67350.1,AT1G67350.2	AT1G67350	+	A	G	0.0228491	226	7.93086	1.88909e-63
5_25734790	AT5G64350	AT5G64350.1	FKBP12	-	T	C	0.0240121	206	7.94424	1.9868e-63
4_15208977	AT4G31340	AT4G31340.1,AT4G31340.2	AT4G31340	+	A	G	0.426812	1490	3.05221	2.15003e-63
1_17717284	AT1G48030	AT1G48030.5,AT1G48030.2,AT1G48030.4,AT1G48030.1,AT1G48030.3	LPD1	-	T	C	0.454545	490	3.27753	2.47906e-63
2_15670614	AT2G37340	AT2G37340.1,AT2G37340.3,AT2G37340.6,AT2G37340.2,AT2G37340.5,AT2G37340.4	RS2Z33	-	T	C	0.0980592	288	3.82677	2.6298e-63
5_26009924	AT5G65110	AT5G65110.1,AT5G65110.2	ACX2	-	T	C	0.1137	244	4.91373	2.70017e-63
2_19110579	AT2G46540	AT2G46540.1	AT2G46540	-	T	C	0.133333	200	17.042	3.07105e-63
1_21073182	AT1G56280	AT1G56280.1,AT1G56280.2	ATDI19	-	T	C	0.461668	3282	2.99619	3.08898e-63
5_7015059	AT5G20720	AT5G20720.1,AT5G20720.2,AT5G20720.3,AT5G20720.4	CPN21	+	A	G	0.0574895	398	2.7432	4.10405e-63
1_18357112	AT1G49600	AT1G49600.1,AT1G49600.3,AT1G49600.2	RBP47A	-	T	C	0.114035	208	7.973	5.29456e-63
3_5052177	AT3G15000	AT3G15000.1	MORF8	+	A	G	0.0946817	235	5.94953	6.25735e-63
1_25235941	AT1G67350	AT1G67350.1,AT1G67350.2	AT1G67350	+	A	G	0.0378507	286	4.26525	6.41972e-63
3_4063567	AT3G12800	AT3G12800.1	SDRB	-	T	C	0.104887	279	8.02578	6.54832e-63
4_15364782	AT4G31750	AT4G31750.2,AT4G31750.3,AT4G31750.1	WIN2	-	T	C	0.246502	229	6.06333	7.12101e-63
2_13181460	AT2G30970	AT2G30970.2,AT2G30970.1	ASP1	+	A	G	0.0705188	227	5.98431	7.66238e-63
1_5008418	AT1G14610	AT1G14610.1	VALRS	-	T	C	0.518519	168	8.19355	8.05119e-63
1_6377449	AT1G18540	AT1G18540.1	RPL6A	-	T	C	0.119746	433	2.89861	8.34008e-63
5_2828425	AT5G08690	AT5G08690.1	AT5G08690	+	A	G	0.0399598	199	7.93235	8.7794e-63
5_9668464	AT5G27380	AT5G27380.1	GSH2	-	T	C	0.11651	223	6.42327	1.10067e-62
5_14900234	AT5G37510	AT5G37510.1,AT5G37510.2	EMB1467	+	A	G	0.0892578	285	3.7213	1.98738e-62
2_18243800	AT2G44100	AT2G44100.1,AT2G44100.2	GDI1	+	A	G	0.0449522	301	4.34367	2.18974e-62
3_19504792	AT3G52580	AT3G52580.1	RPS14C	+	A	G	0.135556	183	17.0888	3.40049e-62
5_25099681	AT5G62530	AT5G62530.1	ALDH12A1	-	T	C	0.0706019	244	6.9749	3.86812e-62
5_2828536	AT5G08690	AT5G08690.1	AT5G08690	+	A	G	0.076083	209	6.36061	5.2566e-62
2_452114	AT2G01970	AT2G01970.1	TMN3	-	T	C	0.162184	199	6.99677	7.17222e-62
4_15471090	AT4G31990	AT4G31990.2,AT4G31990.1,AT4G31990.3,AT4G31990.4	ASP5	-	T	C	0.402747	1466	2.77026	7.40492e-62
2_18205838	AT2G43970	AT2G43970.1,AT2G43970.2	LARP6B	-	T	C	0.0374247	261	4.75044	9.5402e-62
1_19153678	AT1G51650	AT1G51650.1	AT1G51650	+	A	G	0.0162999	217	6.90445	1.09267e-61
4_16755490	AT4G35230	AT4G35230.1	BSK1	-	T	C	0.442623	351	2.51513	1.41574e-61
1_17717311	AT1G48030	AT1G48030.5,AT1G48030.2,AT1G48030.4,AT1G48030.1,AT1G48030.3	LPD1	-	T	C	0.231297	337	4.70542	1.41595e-61
2_7741705	AT2G17800	AT2G17800.1,AT2G17800.2	ARAC1	+	A	G	0.210918	255	4.59357	1.8876e-61
3_22612550	AT3G61110	AT3G61110.1	RPS27B	+	A	G	0.0337068	352	3.11245	1.8876e-61
5_2582194	AT5G08060	AT5G08060.1	AT5G08060	+	A	G	0.0385368	197	17.1033	1.96316e-61
1_26190107	AT1G69620	AT1G69620.1	RPL34B	+	A	G	0.0130359	232	5.65432	2.19985e-61
2_17591548	AT2G42210	AT2G42210.1,AT2G42210.3,AT2G42210.4,AT2G42210.2,AT2G42210.5	OEP163	+	A	G	0.0558874	262	17.6789	2.34021e-61
3_20562538	AT3G55460	AT3G55460.1	SCL30	+	A	G	0.0977517	200	7.91079	2.4099e-61
3_10056032	AT3G27240	AT3G27240.1	CYC11	-	T	C	0.0730217	239	8.03314	2.4271e-61
2_7566413	AT2G17420	AT2G17420.1,AT2G17420.2	NTRA	+	A	G	0.111896	206	6.99691	2.4868e-61
5_17622440	AT5G43830	AT5G43830.1	AT5G43830	-	T	C	0.167933	221	17.4402	2.64064e-61
1_29663941	AT1G78900	AT1G78900.1,AT1G78900.2	VHA-A	+	A	G	0.028626	210	5.68185	2.76505e-61
5_20104788	AT5G49540	AT5G49540.1,AT5G49540.2	AT5G49540	-	T	C	0.164355	237	8.00417	2.88235e-61
2_13413069	AT2G31490	AT2G31490.1	AT2G31490	+	A	G	0.0415405	192	17.2403	3.4012e-61
2_11049750	AT2G25910	AT2G25910.1,AT2G25910.2	AT2G25910	-	T	C	0.0676255	221	5.93358	5.17641e-61
4_252291	AT4G00585	AT4G00585.1	AT4G00585	-	T	C	0.0630558	234	5.03147	5.96644e-61
4_6188910	AT4G09830	AT4G09830.1	AT4G09830	+	A	G	0.0755094	189	6.00812	9.85689e-61
5_3298283	AT5G10480	AT5G10480.1,AT5G10480.2,AT5G10480.3	PAS2	-	T	C	0.123177	245	5.03202	1.11092e-60
1_7953853	AT1G22520	AT1G22520.1,AT1G22520.2	AT1G22520	-	T	C	0.0858738	200	6.90281	1.17101e-60
5_18045042	AT5G44720	AT5G44720.1	AT5G44720	+	A	G	0.208609	252	5.18592	1.17646e-60
5_26618192	AT5G66680	AT5G66680.1	OST48	-	T	C	0.0622673	301	3.85404	1.74687e-60
1_29664635	AT1G78900	AT1G78900.1,AT1G78900.2	VHA-A	+	A	G	0.0339958	195	6.90494	1.90395e-60
1_5203738	AT1G15120	AT1G15120.1,AT1G15120.2	AT1G15120	+	A	G	0.0311985	284	6.01535	2.05017e-60
4_13554787	AT4G27000	AT4G27000.1	RBP45C	-	T	C	0.198614	172	5.77508	2.44855e-60
5_9278113	AT5G26667	AT5G26667.2,AT5G26667.4,AT5G26667.3	UMK3	+	A	G	0.35539	1332	3.4215	2.60776e-60
5_13109478	AT5G34850	AT5G34850.1	PAP26	-	T	C	0.0585448	346	4.64075	3.3536e-60
5_9671750	AT5G27395	AT5G27395.1,AT5G27395.2	AT5G27395	-	T	C	0.397872	187	6.95118	3.80563e-60
5_24015690	AT5G59613	AT5G59613.2,AT5G59613.1	AT5G59613	-	T	C	0.0190592	235	5.65776	4.07083e-60
5_5865390	AT5G17770	AT5G17770.1	CBR1	-	T	C	0.0372471	243	4.85018	4.55139e-60
1_7020366	AT1G20260	AT1G20260.1	VHA-B3	+	A	G	0.0756198	183	17.1553	6.72472e-60
5_9807569	AT5G27700	AT5G27700.1	RPS21C	-	T	C	0.0270518	236	5.41834	9.23303e-60
5_9440831	AT5G26830	AT5G26830.1	THRRS	+	A	G	0.126638	261	4.43501	9.74442e-60
4_16068049	AT4G33360	AT4G33360.1,AT4G33360.2,AT4G33360.3	FLDH	-	T	C	0.0581977	186	16.2871	1.02166e-59
5_25770278	AT5G64440	AT5G64440.1	FAAH	+	A	G	0.331023	191	5.96997	1.14052e-59
1_26564276	AT1G70490	AT1G70490.1,AT1G70490.2,AT1G70490.3,AT1G70490.7,AT1G70490.5,AT1G70490.4,AT1G70490.6	ARF2-A	-	T	C	0.0488615	206	16.9079	1.15032e-59
3_2605803	AT3G08580	AT3G08580.2,AT3G08580.1	AAC1	-	T	C	0.202207	4342	3.50176	1.20328e-59
4_17000437	AT4G35890	AT4G35890.1,AT4G35890.2	LARP1C	+	A	G	0.227967	194	5.94548	1.27692e-59
1_17454146	AT1G47530	AT1G47530.1,AT1G47530.2	AT1G47530	+	A	G	0.20781	298	3.47335	1.33594e-59
3_20846106	AT3G56190	AT3G56190.1,AT3G56190.2	ASNAP2	-	T	C	0.0907354	190	6.91121	1.35516e-59
2_18046284	AT2G43460	AT2G43460.1	RPL38B	-	T	C	0.0222807	288	4.66797	1.36868e-59
4_11161319	AT4G20850	AT4G20850.1	TPP2	-	T	C	0.160545	389	5.02119	1.54676e-59
5_4044946	AT5G12470	AT5G12470.1	AT5G12470	-	T	C	0.11333	210	6.27559	1.76551e-59
4_16986673	AT4G35850	AT4G35850.1	AT4G35850	+	A	G	0.158261	182	16.4461	1.84864e-59
3_17139181	AT3G46560	AT3G46560.1	TIM9	+	A	G	0.0599149	352	4.22938	1.96421e-59
1_9563862	AT1G27530	AT1G27530.1	AT1G27530	-	T	C	0.0641196	193	6.31295	3.62446e-59
5_22381703	AT5G55140	AT5G55140.1	AT5G55140	+	A	G	0.144898	213	5.17132	3.68784e-59
2_11820121	AT2G27730	AT2G27730.1,AT2G27730.4,AT2G27730.3,AT2G27730.2	AT2G27730	-	T	C	0.0347017	306	4.07057	5.24546e-59
1_1509353	AT1G05205	AT1G05205.1	AT1G05205	-	T	C	0.0680612	218	5.85922	5.74378e-59
3_23446077	AT3G63490	AT3G63490.1,AT3G63490.2	RPL1	+	A	G	0.251852	170	16.7743	7.88273e-59
1_2408714	AT1G07770	AT1G07770.3,AT1G07770.2,AT1G07770.1	RPS15AA	-	T	C	0.0169856	213	5.60686	9.93789e-59
5_3258794	AT5G10360	AT5G10360.1,AT5G10360.2	RPS6B	-	T	C	0.0283147	230	4.70411	9.95659e-59
1_21086869	AT1G56330	AT1G56330.1	SAR1B	-	T	C	0.0988458	471	3.71267	1.02425e-58
3_1083160	AT3G04120	AT3G04120.1	GAPC1	+	A	G	0.0160391	259	4.75988	1.37436e-58
1_19884719	AT1G53310	AT1G53310.2,AT1G53310.1,AT1G53310.3	PPC1	-	T	C	0.0704102	242	4.37002	1.56196e-58
3_2917849	AT3G09500	AT3G09500.1	RPL35A	+	A	G	0.0238432	202	6.28624	2.12974e-58
1_7019491	AT1G20260	AT1G20260.1	VHA-B3	+	A	G	0.0426116	295	5.5823	2.27296e-58
1_18986195	AT1G51200	AT1G51200.1,AT1G51200.2,AT1G51200.4,AT1G51200.3	SAP2	+	A	G	0.0448718	210	5.36818	2.34215e-58
2_7343088	AT2G16940	AT2G16940.1,AT2G16940.4,AT2G16940.3,AT2G16940.5,AT2G16940.2	AT2G16940	-	T	C	0.474453	260	4.43055	2.75716e-58
1_9376313	AT1G27000	AT1G27000.1	AT1G27000	+	A	G	0.118028	237	6.34823	2.878e-58
3_5786674	AT3G16950	AT3G16950.1,AT3G16950.2	LPD1	-	T	C	0.210021	197	6.27632	3.19367e-58
1_25263626	AT1G67430	AT1G67430.1,AT1G67430.2	RPL17B	+	A	G	0.0248369	198	7.80516	4.52968e-58
1_4030345	AT1G11930	AT1G11930.2,AT1G11930.1	AT1G11930	+	A	G	0.419283	187	5.33908	4.70703e-58
4_14067377	AT4G28470	AT4G28470.1	RPN1B	-	T	C	0.298324	267	3.71158	5.75032e-58
5_16610030	AT5G41520	AT5G41520.1,AT5G41520.2	RPS10B	-	T	C	0.0277837	260	4.36623	6.95966e-58
2_12416371	AT2G28910	AT2G28910.1,AT2G28910.2,AT2G28910.3	CXIP4	-	T	C	0.052102	290	4.19034	7.28452e-58
5_865456	AT5G03460	AT5G03460.1	AT5G03460	+	A	G	0.0427196	213	5.92063	7.79608e-58
5_25749246	AT5G64400	AT5G64400.1,AT5G64400.2,AT5G64400.3	AT5G64400	+	A	G	0.0787584	713	2.95891	9.85149e-58
5_6851720	AT5G20290	AT5G20290.1	RPS8A	-	T	C	0.0130299	201	5.90408	1.06335e-57
2_223208	AT2G01490	AT2G01490.1,AT2G01490.2	PAHX	+	A	G	0.158879	187	17.8634	1.15944e-57
4_10146698	AT4G18360	AT4G18360.1,AT4G18360.4,AT4G18360.3,AT4G18360.2	GLO5	-	T	C	0.152116	399	4.0681	1.16626e-57
4_7451292	AT4G12590	AT4G12590.1	AT4G12590	-	T	C	0.125843	168	7.87847	1.3071e-57
2_16954956	AT2G40620	AT2G40620.1	AT2G40620	-	T	C	0.340764	214	3.96092	1.31309e-57
2_11528492	AT2G27020	AT2G27020.1,AT2G27020.2	PAG1	-	T	C	0.0645859	209	17.6968	1.35934e-57
5_19292834	AT5G47570	AT5G47570.1	AT5G47570	-	T	C	0.058994	285	4.56349	1.39419e-57
4_6733298	AT4G11010	AT4G11010.1	NDPK3	-	T	C	0.0306865	274	3.8049	1.83705e-57
5_23246226	AT5G57370	AT5G57370.1	AT5G57370	+	A	G	0.221649	172	16.448	1.88662e-57
3_2389259	AT3G07480	AT3G07480.1	AT3G07480	+	A	G	0.0227296	222	4.68819	2.08392e-57
4_17203207	AT4G36420	AT4G36420.1	AT4G36420	-	T	C	0.21074	208	5.10986	2.1959e-57
1_3156120	AT1G09740	AT1G09740.2,AT1G09740.1	AT1G09740	+	A	G	0.0492383	181	17.4731	2.25883e-57
1_17969024	AT1G48600	AT1G48600.1,AT1G48600.2	NMT2	+	A	G	0.0473008	184	6.82672	2.30492e-57
3_7885413	AT3G22290	AT3G22290.1,AT3G22290.2	AT3G22290	+	A	G	0.622302	173	5.10278	2.60774e-57
5_3923821	AT5G12140	AT5G12140.1	CYS1	-	T	C	0.022215	273	3.65837	2.98751e-57
3_3673959	AT3G11630	AT3G11630.1	BAS1	+	A	G	0.156682	204	5.58751	3.39304e-57
5_20342750	AT5G50000	AT5G50000.1,AT5G50000.2	AT5G50000	-	T	C	0.360489	177	6.31349	3.51053e-57
2_7989679	AT2G18400	AT2G18400.1	AT2G18400	-	T	C	0.244819	189	6.32582	3.61433e-57
4_16558370	AT4G34700	AT4G34700.1	CIB22	+	A	G	0.0177955	196	17.6927	4.04358e-57
1_1217225	AT1G04480	AT1G04480.1	RPL23C	+	A	G	0.0362216	204	6.82752	4.06794e-57
5_19406499	AT5G47930	AT5G47930.1	RPS27D	-	T	C	0.0229386	301	3.43954	4.25747e-57
3_19601546	AT3G52880	AT3G52880.1,AT3G52880.2	ATMDAR1	-	T	C	0.0301131	221	6.23138	4.44311e-57
1_17808650	AT1G48230	AT1G48230.1,AT1G48230.2	AT1G48230	+	A	G	0.227387	181	16.5454	4.93399e-57
2_18549738	AT2G44970	AT2G44970.1,AT2G44970.2,AT2G44970.3	AT2G44970	-	T	C	0.257243	293	2.99709	4.99107e-57
1_24249080	AT1G65290	AT1G65290.1	MTACP2	-	T	C	0.0282862	187	7.7752	5.68463e-57
5_24281485	AT5G60360	AT5G60360.1,AT5G60360.3,AT5G60360.2	ALEU	+	A	G	0.0232414	225	5.96904	6.12144e-57
2_12416011	AT2G28910	AT2G28910.1,AT2G28910.2,AT2G28910.3	CXIP4	-	T	C	0.115883	367	4.65205	6.34423e-57
5_3791327	AT5G11770	AT5G11770.1	AT5G11770	-	T	C	0.0179494	205	6.7599	7.17573e-57
4_16558546	AT4G34700	AT4G34700.1	CIB22	+	A	G	0.0215664	228	6.19895	7.98817e-57
5_19789230	AT5G48810	AT5G48810.1	CYTB5-D	-	T	C	0.0581146	217	18.1638	1.00198e-56
1_30169779	AT1G80230	AT1G80230.1	COX5B-2	-	T	C	0.0526196	231	5.81716	1.19611e-56
2_8965052	AT2G20820	AT2G20820.1,AT2G20820.2	AT2G20820	+	A	G	0.0214092	213	5.30086	1.3643e-56
1_4946299	AT1G14450	AT1G14450.1,AT1G14450.2	AT1G14450	-	T	C	0.288026	178	5.00093	1.37872e-56
3_10131160	AT3G27380	AT3G27380.2,AT3G27380.1	SDH2-1	-	T	C	0.0561983	204	6.18774	1.71448e-56
2_7642478	AT2G17560	AT2G17560.1,AT2G17560.2,AT2G17560.3	HMGB4	-	T	C	0.587282	1413	4.26303	2.19084e-56
4_7804689	AT4G13430	AT4G13430.1	IIL1	-	T	C	0.043044	237	4.23652	2.41503e-56
1_17395624	AT1G47420	AT1G47420.1	SDH5	-	T	C	0.0926027	169	16.4637	2.4755e-56
3_87625	AT3G01280	AT3G01280.1	VDAC1	+	A	G	0.0312171	178	16.7888	2.89408e-56
5_209503	AT5G01530	AT5G01530.1	LHCB4.1	+	A	G	0.106786	214	4.36483	3.93482e-56
2_14568999	AT2G34590	AT2G34590.1	E1-BETA-2	-	T	C	0.137306	212	6.85819	3.97192e-56
5_1372314	AT5G04750	AT5G04750.1,AT5G04750.2	AT5G04750	+	A	G	0.0805578	595	3.66496	4.10683e-56
1_29167537	AT1G77610	AT1G77610.1	UDP-GALT1	+	A	G	0.273006	178	6.84165	4.32824e-56
5_2818277	AT5G08670	AT5G08670.1	AT5G08670	-	T	C	0.048462	167	7.81114	4.46168e-56
2_133956	AT2G01250	AT2G01250.1,AT2G01250.2	RPL7B	-	T	C	0.012021	293	4.47274	6.69192e-56
2_9320621	AT2G21870	AT2G21870.1,AT2G21870.2	MGP1	-	T	C	0.0195481	186	6.23502	6.89854e-56
5_6753085	AT5G19990	AT5G19990.3,AT5G19990.1,AT5G19990.2	RPT6A	+	A	G	0.100691	277	3.29368	6.98784e-56
4_2490004	AT4G04910	AT4G04910.1	NSF	-	T	C	0.427195	399	4.55357	7.25669e-56
2_17461425	AT2G41840	AT2G41840.1	RPS2C	-	T	C	0.0853718	349	3.01761	7.55506e-56
1_23669908	AT1G63810	AT1G63810.1,AT1G63810.2	AT1G63810	-	T	C	0.340385	177	17.1966	7.65441e-56
1_30007896	AT1G79750	AT1G79750.1	NADP-ME4	-	T	C	0.0548897	229	4.49983	8.53133e-56
5_22087765	AT5G54390	AT5G54390.1	AHL	+	A	G	0.269945	247	4.12102	9.16804e-56
5_16314606	AT5G40760	AT5G40760.1,AT5G40760.2	ACG12	+	A	G	0.169914	218	17.9432	1.1732e-55
3_8475664	AT3G23600	AT3G23600.1,AT3G23600.2	AT3G23600	+	A	G	0.0461028	236	6.22236	1.4497e-55
1_19103378	AT1G51510	AT1G51510.1	Y14	-	T	C	0.0870556	191	6.2624	1.53049e-55
5_26656534	AT5G66760	AT5G66760.1	SDH1-1	+	A	G	0.0283273	242	4.06078	1.53502e-55
4_18225606	AT4G39120	AT4G39120.1,AT4G39120.2	IMPL2	-	T	C	0.28088	166	7.83254	1.75461e-55
1_19325375	AT1G51980	AT1G51980.1,AT1G51980.2	AT1G51980	-	T	C	0.029233	202	5.51314	1.76867e-55
1_26127500	AT1G69510	AT1G69510.1,AT1G69510.3,AT1G69510.2	AT1G69510	+	A	G	0.0604186	332	4.78902	1.85196e-55
1_5203693	AT1G15120	AT1G15120.1,AT1G15120.2	AT1G15120	+	A	G	0.0368717	380	5.61413	1.86954e-55
1_30028243	AT1G79830	AT1G79830.2,AT1G79830.3,AT1G79830.1,AT1G79830.5,AT1G79830.4	GC5	-	T	C	0.122316	188	6.7683	2.05251e-55
3_6242319	AT3G18215	AT3G18215.1,AT3G18215.2	AT3G18215	+	A	G	0.39726	145	7.97895	2.69913e-55
5_9692773	AT5G27450	AT5G27450.1,AT5G27450.2,AT5G27450.3	MVK	+	A	G	0.190083	184	6.78867	3.28039e-55
5_23874732	AT5G59140	AT5G59140.1	AT5G59140	-	T	C	0.114653	259	3.54145	3.62804e-55
4_14486249	AT4G29480	AT4G29480.1	AT4G29480	-	T	C	0.0832441	311	6.89953	4.30196e-55
5_6090272	AT5G18380	AT5G18380.1	RPS16C	-	T	C	0.0161356	199	5.79318	5.79732e-55
3_19652236	AT3G52990	AT3G52990.1,AT3G52990.2	AT3G52990	+	A	G	0.0635631	213	5.46524	6.63748e-55
3_3778188	AT3G11940	AT3G11940.2,AT3G11940.1	RPS5B	-	T	C	0.0345722	280	4.22163	7.07023e-55
5_4472635	AT5G13850	AT5G13850.1	NACA3	+	A	G	0.0829606	204	4.89049	7.57544e-55
1_22053663	AT1G59900	AT1G59900.1	E1 ALPHA	+	A	G	0.106529	217	6.24442	7.69705e-55
1_10769113	AT1G30450	AT1G30450.1,AT1G30450.3,AT1G30450.2,AT1G30450.4	CCC1	+	A	G	0.56092	244	3.02655	7.88996e-55
3_9423215	AT3G25800	AT3G25800.1,AT3G25800.3,AT3G25800.2	PP2AA2	-	T	C	0.112133	195	5.77625	8.99704e-55
1_12024496	AT1G33140	AT1G33140.1	RPL9B	+	A	G	0.0193744	192	7.73194	9.53893e-55
3_19866858	AT3G53580	AT3G53580.1	DAPF	+	A	G	0.0810938	172	7.74608	1.16252e-54
1_17321398	AT1G47260	AT1G47260.1	GAMMACA2	-	T	C	0.0528455	195	5.78701	1.23322e-54
3_2824992	AT3G09200	AT3G09200.1,AT3G09200.2	RPP0B	-	T	C	0.0236749	201	5.49267	1.44559e-54
1_16647990	AT1G43890	AT1G43890.2,AT1G43890.1,AT1G43890.3	RABC1	+	A	G	0.0697837	200	5.24458	1.52365e-54
1_30228014	AT1G80410	AT1G80410.1,AT1G80410.2	EMB2753	-	T	C	0.157518	198	6.18791	1.58161e-54
3_20545712	AT3G55410	AT3G55410.1,AT3G55410.2	AT3G55410	+	A	G	0.102354	187	7.71836	1.63964e-54
3_17637343	AT3G47810	AT3G47810.3,AT3G47810.1,AT3G47810.2	VPS29	-	T	C	0.207734	736	3.26841	1.6637e-54
3_808342	AT3G03380	AT3G03380.1,AT3G03380.2	DEGP7	+	A	G	0.233588	153	17.1865	1.77544e-54
2_18244409	AT2G44100	AT2G44100.1,AT2G44100.2	GDI1	+	A	G	0.0427619	218	4.72286	1.78222e-54
3_4363682	AT3G13410	AT3G13410.1	AT3G13410	-	T	C	0.0586903	311	3.77954	1.90882e-54
2_11699752	AT2G27350	AT2G27350.2,AT2G27350.3,AT2G27350.1,AT2G27350.6,AT2G27350.5,AT2G27350.4	AT2G27350	-	T	C	0.377729	173	6.24383	2.05265e-54
1_7420477	AT1G21190	AT1G21190.1	LSM3A	-	T	C	0.142159	320	2.93444	3.57637e-54
3_21995906	AT3G59540	AT3G59540.1	RPL38B	-	T	C	0.0183978	175	17.8676	3.82466e-54
5_17159192	AT5G42790	AT5G42790.1	PAF1	-	T	C	0.153675	207	17.1684	4.08196e-54
4_13944185	AT4G28060	AT4G28060.1	COX6B-3	-	T	C	0.379739	2354	3.44251	4.57047e-54
4_5924337	AT4G09320	AT4G09320.1	NDPK1	+	A	G	0.0241839	203	5.47339	4.7201e-54
3_1605358	AT3G05530	AT3G05530.1	RPT5A	+	A	G	0.0564689	237	4.35649	4.85155e-54
4_2818002	AT4G05530	AT4G05530.1	SDRA	+	A	G	0.122878	181	16.8832	5.3612e-54
5_22297999	AT5G54900	AT5G54900.1	RBP45A	+	A	G	0.0940171	176	7.71739	6.11487e-54
3_17779274	AT3G48140	AT3G48140.1	T24C20_20	+	A	G	0.00937009	173	7.73134	6.29559e-54
1_4375840	AT1G12840	AT1G12840.1	VHA-C	+	A	G	0.0703387	378	3.25891	6.4986e-54
1_21377834	AT1G57720	AT1G57720.1,AT1G57720.2	AT1G57720	+	A	G	0.0511211	228	4.25575	6.71292e-54
1_18419076	AT1G49760	AT1G49760.1,AT1G49760.2	PAB8	+	A	G	0.0562329	226	4.03786	6.76512e-54
4_18113481	AT4G38800	AT4G38800.1	MTN1	-	T	C	0.0740947	266	3.66449	8.55397e-54
1_23834989	AT1G64230	AT1G64230.1,AT1G64230.2,AT1G64230.5,AT1G64230.3,AT1G64230.4	UBC28	+	A	G	0.0307806	250	4.91808	8.81403e-54
3_18334337	AT3G49430	AT3G49430.1,AT3G49430.7,AT3G49430.6,AT3G49430.4,AT3G49430.2,AT3G49430.3,AT3G49430.5	SR34A	+	A	G	0.352017	672	2.22604	1.19431e-53
5_25554883	AT5G63860	AT5G63860.1	UVR8	-	T	C	0.1275	153	17.016	1.22112e-53
2_14078996	AT2G33220	AT2G33220.1,AT2G33220.2	AT2G33220	+	A	G	0.0742297	265	3.34891	1.46522e-53
1_21073749	AT1G56280	AT1G56280.1,AT1G56280.2	ATDI19	-	T	C	0.0151894	255	5.40717	1.47481e-53
4_16338156	AT4G34110	AT4G34110.1	PAB2	+	A	G	0.0235697	234	5.18339	1.48155e-53
5_25852595	AT5G64670	AT5G64670.1	AT5G64670	-	T	C	0.166083	237	4.49556	1.6022e-53
1_2463225	AT1G07940	AT1G07940.1,AT1G07940.2,AT1G07940.4,AT1G07940.3	A3	-	T	C	0.0298307	178	7.70375	1.62761e-53
3_214131	AT3G01540	AT3G01540.4,AT3G01540.1,AT3G01540.3,AT3G01540.2	RH14	-	T	C	0.0945188	219	4.34301	1.76373e-53
2_17625325	AT2G42310	AT2G42310.1	AT2G42310	+	A	G	0.0273537	172	6.19469	1.81488e-53
3_20453094	AT3G55170	AT3G55170.5,AT3G55170.4,AT3G55170.3,AT3G55170.2,AT3G55170.1	RPL35C	-	T	C	0.184183	177	6.17906	1.81488e-53
3_5908758	AT3G17300	AT3G17300.1,AT3G17300.2,AT3G17300.3	AT3G17300	+	A	G	0.246114	190	5.79719	1.94387e-53
1_29725126	AT1G79010	AT1G79010.1	AT1G79010	-	T	C	0.751599	2233	2.89483	2.129e-53
2_14805846	AT2G35120	AT2G35120.1	GDH2	-	T	C	0.0453371	193	7.67192	2.17428e-53
2_10685887	AT2G25110	AT2G25110.1	SDF2	+	A	G	0.184127	174	7.73254	2.78655e-53
2_9015896	AT2G20990	AT2G20990.1,AT2G20990.2,AT2G20990.3	SYT1	+	A	G	0.117001	309	3.51882	3.22787e-53
4_18113415	AT4G38800	AT4G38800.1	MTN1	-	T	C	0.074749	201	4.71364	3.24961e-53
4_14067036	AT4G28470	AT4G28470.1	RPN1B	-	T	C	0.247611	285	4.41447	4.20438e-53
5_26820315	AT5G67220	AT5G67220.1	AT5G67220	-	T	C	0.231724	168	6.73412	5.03396e-53
4_12790536	AT4G24820	AT4G24820.2,AT4G24820.1	RPN7	-	T	C	0.0748084	283	6.79582	5.15119e-53
5_3676810	AT5G11500	AT5G11500.1,AT5G11500.2	AT5G11500	+	A	G	0.163832	1387	2.21326	5.38449e-53
4_13594895	AT4G27090	AT4G27090.1	RPL14B	-	T	C	0.0091975	302	3.65867	5.70679e-53
5_2542979	AT5G07960	AT5G07960.1	AT5G07960	+	A	G	0.0589786	179	6.13727	6.1087e-53
2_14631780	AT2G34690	AT2G34690.1	ACD11	+	A	G	0.19285	205	6.2119	6.30596e-53
3_17786339	AT3G48170	AT3G48170.1	ALDH10A9	-	T	C	0.0685667	166	15.9566	6.99699e-53
1_18285703	AT1G49410	AT1G49410.1	TOM6	-	T	C	0.0355181	181	16.9321	7.0631e-53
5_9808073	AT5G27700	AT5G27700.1	RPS21C	-	T	C	0.0350732	254	4.05834	7.21889e-53
4_18214240	AT4G39080	AT4G39080.1	VHA-A3	+	A	G	0.0510559	191	5.76748	7.28126e-53
3_16918981	AT3G46060	AT3G46060.1,AT3G46060.2,AT3G46060.3	RABE1C	+	A	G	0.0936301	244	3.56349	7.28633e-53
5_3035588	AT5G09770	AT5G09770.1	AT5G09770	-	T	C	0.0553811	194	5.20136	7.28633e-53
2_13370802	AT2G31350	AT2G31350.1,AT2G31350.2,AT2G31350.3	GLX2-5	+	A	G	0.273264	185	18.9675	7.29406e-53
5_19789272	AT5G48810	AT5G48810.1	CYTB5-D	-	T	C	0.044021	201	5.20897	7.43594e-53
4_38139	AT4G00100	AT4G00100.1	RPS13B	+	A	G	0.0363636	256	6.17123	9.00561e-53
5_19091973	AT5G47030	AT5G47030.1	AT5G47030	+	A	G	0.0287832	167	7.69128	1.02197e-52
5_3259987	AT5G10360	AT5G10360.1,AT5G10360.2	RPS6B	-	T	C	0.0110813	190	6.12841	1.1309e-52
1_2537659	AT1G08110	AT1G08110.3,AT1G08110.1,AT1G08110.4,AT1G08110.2	AT1G08110	+	A	G	0.0847458	150	16.4006	1.1792e-52
4_18257624	AT4G39200	AT4G39200.1,AT4G39200.2	RPS25E	+	A	G	0.0145498	270	5.47977	1.17999e-52
5_20104728	AT5G49540	AT5G49540.1,AT5G49540.2	AT5G49540	-	T	C	0.210094	179	16.3041	1.2183e-52
2_11820870	AT2G27730	AT2G27730.1,AT2G27730.4,AT2G27730.3,AT2G27730.2	AT2G27730	-	T	C	0.0340314	208	4.68219	1.24147e-52
5_17622524	AT5G43830	AT5G43830.1	AT5G43830	-	T	C	0.0931034	297	7.95971	1.31818e-52
4_13554789	AT4G27000	AT4G27000.1	RBP45C	-	T	C	0.168934	149	5.88976	1.57237e-52
2_17591546	AT2G42210	AT2G42210.1,AT2G42210.3,AT2G42210.4,AT2G42210.2,AT2G42210.5	OEP163	+	A	G	0.0413669	184	5.74821	2.37999e-52
5_5094143	AT5G15650	AT5G15650.1	RGP2	+	A	G	0.303565	1805	2.79007	3.22055e-52
3_23090601	AT3G62400	AT3G62400.2	AT3G62400	+	A	G	0.0476758	160	16.8756	3.2347e-52
5_2785809	AT5G08590	AT5G08590.1,AT5G08590.2	SRK2G	+	A	G	0.199482	154	7.75469	3.85131e-52
2_18549035	AT2G44970	AT2G44970.1,AT2G44970.2,AT2G44970.3	AT2G44970	-	T	C	0.271667	163	7.74715	3.96678e-52
3_19892080	AT3G53670	AT3G53670.1,AT3G53670.2	AT3G53670	+	A	G	0.112156	167	7.65836	5.70993e-52
3_3036478	AT3G09900	AT3G09900.1	RABE1E	+	A	G	0.503226	156	16.7451	9.07405e-52
4_18148741	AT4G38920	AT4G38920.1,AT4G38920.2	VHA-C3	+	A	G	0.0548692	795	4.24845	9.41945e-52
1_24485983	AT1G65820	AT1G65820.1,AT1G65820.3,AT1G65820.2	AT1G65820	+	A	G	0.0215391	206	7.82764	1.00641e-51
5_22422986	AT5G55290	AT5G55290.2,AT5G55290.1,AT5G55290.3	VHA-E1	-	T	C	0.629032	741	4.2994	1.10579e-51
3_2606269	AT3G08580	AT3G08580.2,AT3G08580.1	AAC1	-	T	C	0.0357069	864	2.31729	1.16961e-51
5_6581909	AT5G19510	AT5G19510.1	AT5G19510	-	T	C	0.033823	350	4.4015	1.26795e-51
2_14377941	AT2G34040	AT2G34040.1,AT2G34040.3	AT2G34040	-	T	C	0.328302	174	6.67966	1.34232e-51
2_7642468	AT2G17560	AT2G17560.1,AT2G17560.2,AT2G17560.3	HMGB4	-	T	C	0.0889545	211	6.67142	1.47114e-51
5_24290581	AT5G60390	AT5G60390.1,AT5G60390.3,AT5G60390.2	A3	+	A	G	0.0133546	351	2.99951	1.71357e-51
4_13468785	AT4G26710	AT4G26710.1,AT4G26710.2	VHA-E2	+	A	G	0.0479316	241	3.89257	2.17793e-51
2_17625292	AT2G42310	AT2G42310.1	AT2G42310	+	A	G	0.031749	169	5.74694	2.36718e-51
1_19103028	AT1G51510	AT1G51510.1	Y14	-	T	C	0.142949	223	17.7502	2.39651e-51
1_23833804	AT1G64230	AT1G64230.1,AT1G64230.2,AT1G64230.5,AT1G64230.3,AT1G64230.4	UBC28	+	A	G	0.0285841	258	7.87293	2.4618e-51
5_16609437	AT5G41520	AT5G41520.1,AT5G41520.2	RPS10B	-	T	C	0.0371068	256	4.72816	2.51045e-51
3_2616426	AT3G08610	AT3G08610.1	AT3G08610	-	T	C	0.0244387	246	6.73717	2.78769e-51
1_30272253	AT1G80500	AT1G80500.1,AT1G80500.2	AT1G80500	+	A	G	0.0764752	197	6.04416	2.92505e-51
5_15845877	AT5G39570	AT5G39570.2,AT5G39570.1	AT5G39570	+	A	G	0.0302882	186	6.10232	2.9711e-51
5_2577287	AT5G08040	AT5G08040.1	TOM5	-	T	C	0.0650407	160	15.8848	3.13044e-51
5_13832533	AT5G35630	AT5G35630.3,AT5G35630.1,AT5G35630.2	GLN2	+	A	G	0.0386224	314	3.66507	3.72115e-51
1_4889452	AT1G14320	AT1G14320.1,AT1G14320.2	RPL10A	+	A	G	0.0236671	265	3.85206	3.9253e-51
5_9255597	AT5G26360	AT5G26360.1	CCT3	-	T	C	0.0622027	170	7.63255	4.27952e-51
5_19092075	AT5G47030	AT5G47030.1	AT5G47030	+	A	G	0.0476481	156	16.8916	4.93303e-51
5_19168514	AT5G47200	AT5G47200.1	RABD2B	+	A	G	0.04454	259	6.14723	6.02199e-51
5_6582181	AT5G19510	AT5G19510.1	AT5G19510	-	T	C	0.0144014	208	4.97691	6.07208e-51
4_10943170	AT4G20260	AT4G20260.10,AT4G20260.3,AT4G20260.1,AT4G20260.2,AT4G20260.4,AT4G20260.9,AT4G20260.7,AT4G20260.8,AT4G20260.6,AT4G20260.5	PCAP1	+	A	G	0.0259811	192	6.06186	6.12403e-51
4_11477457	AT4G21580	AT4G21580.1,AT4G21580.2,AT4G21580.3	AT4G21580	+	A	G	0.0820896	176	6.07356	7.1568e-51
1_21074174	AT1G56280	AT1G56280.1,AT1G56280.2	ATDI19	-	T	C	0.017031	194	5.37429	7.22015e-51
1_20136779	AT1G53910	AT1G53910.1,AT1G53910.2,AT1G53910.3	RAP2-12	+	A	G	0.0993022	185	4.67839	7.55539e-51
1_22719369	AT1G61570	AT1G61570.1	TIM13	-	T	C	0.0631808	261	3.8961	1.03031e-50
4_12420024	AT4G23885	AT4G23885.1	AT4G23885	+	A	G	0.106713	248	6.11116	1.05329e-50
1_24541675	AT1G65930	AT1G65930.1	CICDH	+	A	G	0.0121919	184	5.02243	1.05395e-50
5_2626030	AT5G08160	AT5G08160.1,AT5G08160.2	ATPK3	-	T	C	0.128389	161	6.12247	1.08419e-50
3_15984840	AT3G44300	AT3G44300.1	NIT2	+	A	G	0.0323308	258	3.70453	1.27337e-50
5_18664566	AT5G46020	AT5G46020.1	AT5G46020	-	T	C	0.062218	262	3.28248	1.32104e-50
5_3259670	AT5G10360	AT5G10360.1,AT5G10360.2	RPS6B	-	T	C	0.0146936	247	4.61748	1.35821e-50
5_18757788	AT5G46250	AT5G46250.1	LARP6A	+	A	G	0.0710339	180	4.98011	1.43099e-50
1_16942368	AT1G44835	AT1G44835.1,AT1G44835.2	AT1G44835	+	A	G	0.544086	253	6.91391	1.70541e-50
5_6845580	AT5G20280	AT5G20280.1	SPS1	-	T	C	0.315716	227	3.64935	1.78304e-50
5_3570685	AT5G11200	AT5G11200.1,AT5G11200.2,AT5G11200.3	RH15	+	A	G	0.280116	579	3.39969	1.91798e-50
2_13370769	AT2G31350	AT2G31350.1,AT2G31350.2,AT2G31350.3	GLX2-5	+	A	G	0.228442	151	5.77394	2.37953e-50
3_21708627	AT3G58680	AT3G58680.1	MBF1B	+	A	G	0.0663363	174	7.71185	2.71827e-50
4_13555412	AT4G27000	AT4G27000.1	RBP45C	-	T	C	0.115523	320	3.96067	2.74359e-50
2_13383535	AT2G31390	AT2G31390.1	AT2G31390	-	T	C	0.082466	206	7.70882	2.86857e-50
3_2615634	AT3G08610	AT3G08610.1	AT3G08610	-	T	C	0.0255102	170	6.61928	2.9116e-50
1_23833632	AT1G64230	AT1G64230.1,AT1G64230.2,AT1G64230.5,AT1G64230.3,AT1G64230.4	UBC28	+	A	G	0.0723549	318	3.34865	3.04008e-50
5_3949711	AT5G12210	AT5G12210.1,AT5G12210.2	AtRGTB1	+	A	G	0.215267	141	7.71844	5.10439e-50
1_25236609	AT1G67350	AT1G67350.1,AT1G67350.2	AT1G67350	+	A	G	0.0333198	247	7.75345	5.31895e-50
3_2587532	AT3G08530	AT3G08530.1	CHC2	-	T	C	0.0636277	201	4.28548	5.35464e-50
5_2828335	AT5G08690	AT5G08690.1	AT5G08690	+	A	G	0.028345	186	5.66089	5.98859e-50
5_19091878	AT5G47030	AT5G47030.1	AT5G47030	+	A	G	0.0278083	177	5.16099	7.44134e-50
5_3258957	AT5G10360	AT5G10360.1,AT5G10360.2	RPS6B	-	T	C	0.0205193	245	3.53562	7.88761e-50
3_22287088	AT3G60300	AT3G60300.1,AT3G60300.2	AT3G60300	+	A	G	0.0754815	145	7.65639	8.23363e-50
2_16710232	AT2G40010	AT2G40010.1	RPP0A	-	T	C	0.450106	212	4.31858	8.34147e-50
3_20555299	AT3G55440	AT3G55440.1	CTIMC	+	A	G	0.0227899	513	4.37914	1.02644e-49
5_5247176	AT5G16060	AT5G16060.1	AT5G16060	+	A	G	0.11028	177	5.64498	1.18403e-49
4_14673935	AT4G30010	AT4G30010.1	AT4G30010	+	A	G	0.0248314	162	6.64552	1.20606e-49
1_296208	AT1G01820	AT1G01820.1	PEX11C	-	T	C	0.305584	301	4.14971	1.23995e-49
4_6732887	AT4G11010	AT4G11010.1	NDPK3	-	T	C	0.234043	1793	3.59237	1.26062e-49
5_4448482	AT5G13780	AT5G13780.1	AT5G13780	-	T	C	0.0348145	228	4.13024	1.33264e-49
3_18760334	AT3G50550	AT3G50550.1,AT3G50550.2	AT3G50550	+	A	G	0.384615	180	17.4519	1.3601e-49
5_5406601	AT5G16550	AT5G16550.1	AT5G16550	+	A	G	0.120472	153	7.63002	1.41141e-49
4_16339264	AT4G34110	AT4G34110.1	PAB2	+	A	G	0.0173036	187	5.14359	1.59741e-49
3_19876451	AT3G53610	AT3G53610.1,AT3G53610.2,AT3G53610.3	RABE1A	-	T	C	0.249373	199	7.80749	2.18477e-49
3_4561759	AT3G13860	AT3G13860.1	HSP60-3A	-	T	C	0.247134	194	5.06021	2.3099e-49
5_12590647	AT5G33320	AT5G33320.1	PPT1	+	A	G	0.0717477	273	3.07506	2.90865e-49
1_12370245	AT1G34030	AT1G34030.1	RPS18A	-	T	C	0.0725103	158	7.57283	3.044e-49
4_14938637	AT4G30600	AT4G30600.1,AT4G30600.2	AT4G30600	-	T	C	0.117291	194	4.5802	3.23179e-49
3_87654	AT3G01280	AT3G01280.1	VDAC1	+	A	G	0.0338144	164	7.54651	4.07514e-49
4_12021148	AT4G22930	AT4G22930.2,AT4G22930.1	PYR4	+	A	G	0.115044	156	7.5884	4.35046e-49
5_4136246	AT5G13030	AT5G13030.1	AT5G13030	+	A	G	0.154215	161	6.06901	4.68337e-49
5_16913615	AT5G42300	AT5G42300.1	UBL5	-	T	C	0.0224328	232	7.65234	4.9063e-49
1_2949069	AT1G09150	AT1G09150.1	AT1G09150	+	A	G	0.490775	133	16.816	5.01459e-49
3_20545020	AT3G55410	AT3G55410.1,AT3G55410.2	AT3G55410	+	A	G	0.1068	300	4.27825	5.38386e-49
5_3621025	AT5G11340	AT5G11340.1	AT5G11340	+	A	G	0.124718	166	6.58078	5.70703e-49
4_12884731	AT4G25100	AT4G25100.2,AT4G25100.5,AT4G25100.3,AT4G25100.1,AT4G25100.4	FSD1	-	T	C	0.0138365	290	3.86929	6.10312e-49
1_20104553	AT1G53850	AT1G53850.1,AT1G53850.2	PAE1	-	T	C	0.0834185	245	4.16694	6.71835e-49
5_9692893	AT5G27450	AT5G27450.1,AT5G27450.2,AT5G27450.3	MVK	+	A	G	0.229586	194	4.31734	7.00393e-49
5_210164	AT5G01530	AT5G01530.1	LHCB4.1	+	A	G	0.0923411	170	4.7926	7.11083e-49
3_2616488	AT3G08610	AT3G08610.1	AT3G08610	-	T	C	0.323103	3411	3.70269	9.30962e-49
5_26437466	AT5G66140	AT5G66140.1	PAD2	-	T	C	0.126437	198	7.53	9.76461e-49
3_705708	AT3G03100	AT3G03100.1,AT3G03100.2	AT3G03100	-	T	C	0.0317628	240	4.22818	1.078e-48
1_18986001	AT1G51200	AT1G51200.1,AT1G51200.2,AT1G51200.4,AT1G51200.3	SAP2	+	A	G	0.0303551	159	5.68386	1.20284e-48
3_14229915	AT3G42050	AT3G42050.1	VHA-H	-	T	C	0.0312379	162	6.03541	1.21874e-48
5_3259458	AT5G10360	AT5G10360.1,AT5G10360.2	RPS6B	-	T	C	0.0110558	220	4.0711	1.43806e-48
4_9773178	AT4G17520	AT4G17520.1	AT4G17520	+	A	G	0.05262	239	5.05977	1.5189e-48
2_19552013	AT2G47690	AT2G47690.1,AT2G47690.2,AT2G47690.3	AT2G47690	+	A	G	0.0280784	179	6.02705	1.54311e-48
5_2824137	AT5G08680	AT5G08680.1	AT5G08680	+	A	G	0.0358768	205	4.06544	1.54311e-48
3_19660786	AT3G53020	AT3G53020.1	RPL24B	-	T	C	0.0268981	203	5.34878	1.64251e-48
2_18857734	AT2G45790	AT2G45790.1	PMM	+	A	G	0.0676516	174	7.53939	1.66833e-48
1_23833802	AT1G64230	AT1G64230.1,AT1G64230.2,AT1G64230.5,AT1G64230.3,AT1G64230.4	UBC28	+	A	G	0.0321391	305	4.79091	1.7136e-48
4_16339274	AT4G34110	AT4G34110.1	PAB2	+	A	G	0.0297195	321	4.18747	1.74522e-48
5_15472653	AT5G38650	AT5G38650.1	AT5G38650	-	T	C	0.0369408	199	5.04029	1.77656e-48
5_7016311	AT5G20720	AT5G20720.1,AT5G20720.2,AT5G20720.3,AT5G20720.4	CPN21	+	A	G	0.102089	347	2.48642	1.78911e-48
1_3159773	AT1G09760	AT1G09760.1	U2A'	-	T	C	0.0798969	186	5.60012	2.07715e-48
4_15693763	AT4G32530	AT4G32530.1,AT4G32530.2	VHA-c''1	-	T	C	0.169521	673	2.00642	2.16333e-48
4_16233377	AT4G33865	AT4G33865.1	RPS29A	-	T	C	0.0200448	161	16.9701	2.43999e-48
3_368619	AT3G02090	AT3G02090.1,AT3G02090.2	MPPBETA	+	A	G	0.0579297	244	6.68082	2.69896e-48
1_2637739	AT1G08360	AT1G08360.1	RPL10AA	+	A	G	0.0475528	205	6.64503	2.71637e-48
5_9807490	AT5G27700	AT5G27700.1	RPS21C	-	T	C	0.0329489	160	6.57505	2.72654e-48
3_22402370	AT3G60600	AT3G60600.1,AT3G60600.2,AT3G60600.3	PVA11	+	A	G	0.0404668	215	4.1533	3.2732e-48
2_14176744	AT2G33470	AT2G33470.2,AT2G33470.1	GLTP1	-	T	C	0.0837209	270	5.60819	3.31279e-48
1_5402225	AT1G15690	AT1G15690.1,AT1G15690.2	AVP1	+	A	G	0.044397	208	5.41618	3.39557e-48
2_14532944	AT2G34480	AT2G34480.1,AT2G34480.2	RPL18AB	-	T	C	0.0163975	197	4.681	3.66933e-48
5_815431	AT5G03345	AT5G03345.1,AT5G03345.2	AT5G03345	+	A	G	0.10121	184	4.71076	6.47415e-48
4_15354768	AT4G31720	AT4G31720.1,AT4G31720.2,AT4G31720.3	TAF10	-	T	C	0.164565	248	3.8511	8.15273e-48
5_20951188	AT5G51570	AT5G51570.1	HIR4	+	A	G	0.197598	181	6.07347	8.29258e-48
3_8475668	AT3G23600	AT3G23600.1,AT3G23600.2	AT3G23600	+	A	G	0.0386445	195	5.97577	8.97232e-48
1_18357211	AT1G49600	AT1G49600.1,AT1G49600.3,AT1G49600.2	RBP47A	-	T	C	0.092517	204	4.54377	9.27887e-48
5_6851661	AT5G20290	AT5G20290.1	RPS8A	-	T	C	0.0163064	169	5.34346	9.78565e-48
3_1605685	AT3G05530	AT3G05530.1	RPT5A	+	A	G	0.0504202	192	4.6854	9.92643e-48
2_10183157	AT2G23930	AT2G23930.1,AT2G23930.2	SNRNP-G	+	A	G	0.110936	141	17.3896	1.00413e-47
5_25750127	AT5G64400	AT5G64400.1,AT5G64400.2,AT5G64400.3	AT5G64400	+	A	G	0.01843	185	5.05557	1.05925e-47
2_12416395	AT2G28910	AT2G28910.1,AT2G28910.2,AT2G28910.3	CXIP4	-	T	C	0.0313793	182	4.58858	1.31718e-47
5_9874300	AT5G27850	AT5G27850.2,AT5G27850.1	RPL18C	+	A	G	0.0210539	175	5.58854	1.32188e-47
5_3791260	AT5G11770	AT5G11770.1	AT5G11770	-	T	C	0.0140988	167	7.46542	1.38088e-47
1_23789564	AT1G64090	AT1G64090.1,AT1G64090.2	RTNLB3	+	A	G	0.0584692	330	2.36092	1.40512e-47
2_19501757	AT2G47510	AT2G47510.1,AT2G47510.3,AT2G47510.2	FUM1	+	A	G	0.03417	162	16.9339	1.54702e-47
4_11787499	AT4G22300	AT4G22300.1	SOBER1	-	T	C	0.387574	131	6.68101	1.76955e-47
1_3159444	AT1G09760	AT1G09760.1	U2A'	-	T	C	0.0916856	161	5.61314	1.85303e-47
5_3443876	AT5G10920	AT5G10920.1	T30N20_190	+	A	G	0.279857	157	5.99473	1.85998e-47
5_24336924	AT5G60540	AT5G60540.1	PDX2	-	T	C	0.187853	133	7.7015	1.88528e-47
5_8009198	AT5G23740	AT5G23740.1	RPS11C	-	T	C	0.040297	369	2.29901	2.15456e-47
1_28135694	AT1G74910	AT1G74910.1,AT1G74910.2,AT1G74910.3	AT1G74910	-	T	C	0.217092	221	5.31916	2.15907e-47
3_19892092	AT3G53670	AT3G53670.1,AT3G53670.2	AT3G53670	+	A	G	0.113952	156	7.52086	2.21643e-47
5_5696943	AT5G17310	AT5G17310.2,AT5G17310.5,AT5G17310.4,AT5G17310.6,AT5G17310.3,AT5G17310.1	UGP2	-	T	C	0.53719	130	7.79283	2.38617e-47
1_9171817	AT1G26550	AT1G26550.1	AT1G26550	+	A	G	0.0542882	188	5.06139	2.71643e-47
5_3035169	AT5G09770	AT5G09770.1	AT5G09770	-	T	C	0.336134	120	7.7314	3.28885e-47
3_19397694	AT3G52300	AT3G52300.1,AT3G52300.2	ATPQ	+	A	G	0.0103174	158	6.02284	3.39954e-47
1_19153780	AT1G51650	AT1G51650.1	AT1G51650	+	A	G	0.0222743	152	7.5192	3.65601e-47
3_4433847	AT3G13580	AT3G13580.1,AT3G13580.2,AT3G13580.9,AT3G13580.3,AT3G13580.7,AT3G13580.8,AT3G13580.6,AT3G13580.5,AT3G13580.4	RPL7D	+	A	G	0.0521297	164	6.50252	4.25554e-47
5_25665148	AT5G64130	AT5G64130.1,AT5G64130.3,AT5G64130.2	AT5G64130	-	T	C	0.0223716	203	5.07857	4.44531e-47
4_17683132	AT4G37640	AT4G37640.1	ACA2	-	T	C	0.481132	153	4.52397	4.6394e-47
4_10504955	AT4G19210	AT4G19210.1	ABCE2	+	A	G	0.116946	216	6.62495	4.66922e-47
5_5373493	AT5G16440	AT5G16440.1	IPP1	+	A	G	0.0677177	189	4.53006	5.63622e-47
2_15170292	AT2G36160	AT2G36160.1	RPS14A	+	A	G	0.025539	231	3.68591	5.84649e-47
1_29796460	AT1G79210	AT1G79210.1,AT1G79210.3,AT1G79210.2	PAB2	-	T	C	0.0817102	172	16.1331	6.34948e-47
4_12709050	AT4G24620	AT4G24620.1,AT4G24620.2	PGI1	-	T	C	0.0547074	215	17.571	6.55656e-47
3_543149	AT3G02560	AT3G02560.1,AT3G02560.3,AT3G02560.2	RPS7B	+	A	G	0.0565383	163	5.9932	6.63371e-47
5_10069937	AT5G28060	AT5G28060.1	RPS24B	-	T	C	0.0181611	191	4.86648	8.42082e-47
1_26127192	AT1G69510	AT1G69510.1,AT1G69510.3,AT1G69510.2	AT1G69510	+	A	G	0.0420394	282	4.71167	8.61021e-47
5_863227	AT5G03455	AT5G03455.1,AT5G03455.2	CDC25	+	A	G	0.0667823	154	7.50996	9.2445e-47
4_12593381	AT4G24280	AT4G24280.1	HSP70-6	+	A	G	0.0894131	163	4.89586	1.09086e-46
4_18214555	AT4G39080	AT4G39080.1	VHA-A3	+	A	G	0.0508873	195	5.08752	1.14436e-46
2_13639608	AT2G32060	AT2G32060.1,AT2G32060.2,AT2G32060.3	RPS12C	-	T	C	0.0172233	164	6.49377	1.16423e-46
5_26384846	AT5G65950	AT5G65950.1	AT5G65950	+	A	G	0.235123	162	4.24375	1.16953e-46
4_14672959	AT4G30010	AT4G30010.1	AT4G30010	+	A	G	0.0236202	199	5.56332	1.29821e-46
4_15308259	AT4G31580	AT4G31580.2,AT4G31580.1	RSZ22	+	A	G	0.235382	157	7.52685	1.47447e-46
3_17454033	AT3G47370	AT3G47370.1,AT3G47370.3,AT3G47370.2	RPS20B	-	T	C	0.029623	297	3.72758	1.48676e-46
2_16475973	AT2G39460	AT2G39460.1,AT2G39460.2	RPL23AA	+	A	G	0.0396786	158	5.95786	1.89179e-46
3_17779417	AT3G48140	AT3G48140.1	T24C20_20	+	A	G	0.0758311	641	2.62335	1.94582e-46
4_18114652	AT4G38800	AT4G38800.1	MTN1	-	T	C	0.028514	156	5.99343	2.04329e-46
2_17188430	AT2G41220	AT2G41220.1	GLU2	+	A	G	0.0785936	152	17.1245	2.14927e-46
5_17387115	AT5G43320	AT5G43320.1,AT5G43320.3,AT5G43320.2	ckl8	-	T	C	0.0990401	227	3.43256	2.56146e-46
3_4684766	AT3G14120	AT3G14120.2,AT3G14120.1,AT3G14120.3	NUP107	+	A	G	0.594235	268	2.7676	2.5617e-46
4_14562926	AT4G29735	AT4G29735.1,AT4G29735.2	AT4G29735	-	T	C	0.0929054	165	16.9896	2.58061e-46
1_2637624	AT1G08360	AT1G08360.1	RPL10AA	+	A	G	0.0235849	160	5.95096	2.61457e-46
1_2637247	AT1G08360	AT1G08360.1	RPL10AA	+	A	G	0.0318075	271	4.11415	2.6305e-46
1_5165853	AT1G14980	AT1G14980.1,AT1G14980.2	CPN10	-	T	C	0.0500227	220	6.60719	2.96822e-46
4_18113389	AT4G38800	AT4G38800.1	MTN1	-	T	C	0.0601307	138	17.8262	3.11635e-46
1_26190809	AT1G69620	AT1G69620.1	RPL34B	+	A	G	0.0424275	632	2.94482	4.1518e-46
3_22287349	AT3G60300	AT3G60300.1,AT3G60300.2	AT3G60300	+	A	G	0.184595	139	6.02888	4.70119e-46
5_25565694	AT5G63890	AT5G63890.2,AT5G63890.1	HISN8	-	T	C	0.153846	156	7.48521	4.94142e-46
4_15209330	AT4G31340	AT4G31340.1,AT4G31340.2	AT4G31340	+	A	G	0.057154	147	7.47486	4.99852e-46
2_18205418	AT2G43970	AT2G43970.1,AT2G43970.2	LARP6B	-	T	C	0.0553428	159	6.49194	5.17733e-46
2_14075550	AT2G33210	AT2G33210.1,AT2G33210.2	HSP60-2	-	T	C	0.106788	247	4.00115	5.84946e-46
5_26009920	AT5G65110	AT5G65110.1,AT5G65110.2	ACX2	-	T	C	0.087941	167	5.02591	7.86077e-46
1_30058862	AT1G79920	AT1G79920.1,AT1G79920.3,AT1G79920.2,AT1G79920.4	HSP70-15	-	T	C	0.0948122	159	6.47083	8.77887e-46
1_29304279	AT1G77940	AT1G77940.1	RPL30B	-	T	C	0.0120823	175	5.033	8.85877e-46
1_28152673	AT1G74960	AT1G74960.2,AT1G74960.3,AT1G74960.1	KAS2	-	T	C	0.141395	221	5.27919	8.85883e-46
2_15055104	AT2G35840	AT2G35840.1,AT2G35840.3,AT2G35840.2,AT2G35840.4	SPP2	+	A	G	0.133818	184	3.85987	9.30044e-46
5_16807698	AT5G42020	AT5G42020.1,AT5G42020.3,AT5G42020.2	MED37F	-	T	C	0.027408	175	5.8754	9.93356e-46
5_5989632	AT5G18110	AT5G18110.1	NCBP	-	T	C	0.0594706	173	4.53238	1.04316e-45
1_27016754	AT1G71820	AT1G71820.1,AT1G71820.2	SEC6	+	A	G	0.258537	159	5.24057	1.04938e-45
2_9028783	AT2G21045	AT2G21045.1	STR19	+	A	G	0.0351438	253	6.61358	1.11505e-45
1_10640279	AT1G30230	AT1G30230.1,AT1G30230.2	AT1G30230	+	A	G	0.0727843	859	2.22858	1.1712e-45
2_452118	AT2G01970	AT2G01970.1	TMN3	-	T	C	0.127517	152	5.57953	1.28277e-45
1_18218095	AT1G49240	AT1G49240.1	ACT8	+	A	G	0.425026	2860	3.24973	1.40023e-45
2_19500754	AT2G47510	AT2G47510.1,AT2G47510.3,AT2G47510.2	FUM1	+	A	G	0.0533463	165	5.5221	1.4248e-45
4_15267741	AT4G31480	AT4G31480.1,AT4G31480.9,AT4G31480.2,AT4G31480.7,AT4G31480.8,AT4G31480.4,AT4G31480.3,AT4G31480.5,AT4G31480.6	AT4G31480	+	A	G	0.257911	163	7.57285	1.43869e-45
3_17779400	AT3G48140	AT3G48140.1	T24C20_20	+	A	G	0.0162674	165	5.97126	1.44337e-45
2_9553980	AT2G22490	AT2G22490.1,AT2G22490.2	CYCD2-1	-	T	C	0.333333	131	6.58995	1.56305e-45
2_11821799	AT2G27730	AT2G27730.1,AT2G27730.4,AT2G27730.3,AT2G27730.2	AT2G27730	-	T	C	0.0420647	229	3.87949	1.5995e-45
5_6090321	AT5G18380	AT5G18380.2,AT5G18380.1	RPS16C	-	T	C	0.0175632	271	3.77646	1.83637e-45
5_25394241	AT5G63400	AT5G63400.1,AT5G63400.2	ADK1	-	T	C	0.0204738	229	4.36062	1.98223e-45
4_16484855	AT4G34490	AT4G34490.1,AT4G34490.2	CAP1	-	T	C	0.0831858	141	7.48087	2.0463e-45
5_25750111	AT5G64400	AT5G64400.1,AT5G64400.2,AT5G64400.3	AT5G64400	+	A	G	0.0168823	184	4.79167	2.11327e-45
5_3949752	AT5G12210	AT5G12210.1,AT5G12210.2	AtRGTB1	+	A	G	0.37018	144	17.5567	2.1684e-45
1_22355016	AT1G60710	AT1G60710.1	ATB2	-	T	C	0.0809917	196	5.95629	2.34921e-45
1_21073194	AT1G56280	AT1G56280.1,AT1G56280.2	ATDI19	-	T	C	0.217575	1644	2.13513	2.50631e-45
4_11266399	AT4G21105	AT4G21105.1,AT4G21105.3	AT4G21105	+	A	G	0.0223834	253	6.06675	2.53939e-45
4_251155	AT4G00585	AT4G00585.1	AT4G00585	-	T	C	0.615768	2101	3.22476	2.59511e-45
4_15520310	AT4G32130	AT4G32130.1	AT4G32130	-	T	C	0.108453	136	17.2801	2.75702e-45
3_10057096	AT3G27240	AT3G27240.1	CYC11	-	T	C	0.0233124	182	4.69741	2.81046e-45
1_2408457	AT1G07770	AT1G07770.3,AT1G07770.2,AT1G07770.1	RPS15AA	-	T	C	0.015242	148	7.44435	3.23928e-45
4_568527	AT4G01370	AT4G01370.1	MPK4	+	A	G	0.167224	150	5.55711	3.27103e-45
2_17698341	AT2G42500	AT2G42500.1,AT2G42500.2	PP2A4	-	T	C	0.0840689	200	4.01609	4.2967e-45
5_14133812	AT5G35980	AT5G35980.1,AT5G35980.3,AT5G35980.2	YAK1	+	A	G	0.25777	282	2.54275	4.2967e-45
5_21355690	AT5G52650	AT5G52650.1	RPS10C	-	T	C	0.0619469	147	7.43654	4.41281e-45
5_16676116	AT5G41700	AT5G41700.1,AT5G41700.5,AT5G41700.3,AT5G41700.2,AT5G41700.4	UBC8	+	A	G	0.0771654	588	2.96653	4.55009e-45
3_368506	AT3G02090	AT3G02090.1,AT3G02090.2	MPPBETA	+	A	G	0.0219061	154	5.93118	5.13648e-45
2_8807784	AT2G20420	AT2G20420.1	AT2G20420	+	A	G	0.0283462	169	6.4867	5.36325e-45
5_3762824	AT5G11700	AT5G11700.2,AT5G11700.1	AT5G11700	-	T	C	0.235401	129	16.5893	6.00675e-45
3_2824995	AT3G09200	AT3G09200.1,AT3G09200.2	RPP0B	-	T	C	0.0206186	164	5.51828	6.62484e-45
1_27849986	AT1G74060	AT1G74060.1	RPL6B	-	T	C	0.052458	175	4.77821	7.75246e-45
1_4946321	AT1G14450	AT1G14450.1,AT1G14450.2	AT1G14450	-	T	C	0.123574	130	17.016	8.21433e-45
2_19646995	AT2G48020	AT2G48020.1,AT2G48020.2,AT2G48020.4,AT2G48020.3	AT2G48020	+	A	G	0.177403	179	6.47333	8.58418e-45
4_1130858	AT4G02570	AT4G02570.2,AT4G02570.1,AT4G02570.3,AT4G02570.4	CUL1	+	A	G	0.0580456	158	5.89392	8.65728e-45
3_6866507	AT3G19760	AT3G19760.1	RH2	+	A	G	0.185139	147	6.47032	9.2937e-45
1_5776443	AT1G16890	AT1G16890.2,AT1G16890.1,AT1G16890.3	UBC36	-	T	C	0.114286	136	16.7747	9.39628e-45
5_6803982	AT5G20160	AT5G20160.1,AT5G20160.2	AT5G20160	-	T	C	0.132296	170	4.96031	1.00868e-44
5_21633216	AT5G53300	AT5G53300.4,AT5G53300.2,AT5G53300.1,AT5G53300.3	UBC10	-	T	C	0.012632	183	4.26613	1.03019e-44
4_18257867	AT4G39200	AT4G39200.1,AT4G39200.2	RPS25E	+	A	G	0.00875467	218	4.54022	1.03507e-44
1_27109454	AT1G72020	AT1G72020.1	AT1G72020	-	T	C	0.0228261	147	7.4317	1.04988e-44
3_805339	AT3G03380	AT3G03380.1,AT3G03380.2	DEGP7	+	A	G	0.530079	467	2.07692	1.18946e-44
1_5756720	AT1G16810	AT1G16810.2,AT1G16810.1	AT1G16810	+	A	G	0.110849	141	16.7214	1.27823e-44
4_732100	AT4G01690	AT4G01690.1	PPOX1	+	A	G	0.250737	255	2.94676	1.30569e-44
2_14805800	AT2G35120	AT2G35120.1	GDH2	-	T	C	0.0632045	157	6.41621	1.861e-44
3_5802612	AT3G17020	AT3G17020.1,AT3G17020.2	AT3G17020	-	T	C	0.209341	251	17.8124	2.15956e-44
4_13469653	AT4G26710	AT4G26710.1,AT4G26710.2	VHA-E2	+	A	G	0.032074	163	7.49502	2.29175e-44
1_8508638	AT1G24050	AT1G24050.1	AT1G24050	+	A	G	0.104478	133	7.47196	2.65072e-44
5_25393550	AT5G63400	AT5G63400.1	ADK1	-	T	C	0.365268	3481	1.9873	3.27521e-44
4_16558613	AT4G34700	AT4G34700.1	CIB22	+	A	G	0.802624	5750	4.03349	3.54301e-44
1_4889450	AT1G14320	AT1G14320.1,AT1G14320.2	RPL10A	+	A	G	0.0140081	160	6.43908	4.57431e-44
4_13519983	AT4G26910	AT4G26910.2,AT4G26910.1,AT4G26910.3	AT4G26910	-	T	C	0.163158	124	16.562	4.86952e-44
3_2523441	AT3G07910	AT3G07910.1	AT3G07910	-	T	C	0.249505	882	2.7951	5.16097e-44
5_9836359	AT5G27770	AT5G27770.1	RPL22C	+	A	G	0.0202684	216	3.61861	5.27641e-44
1_13122571	AT1G35580	AT1G35580.2,AT1G35580.1	CINV1	-	T	C	0.26487	1661	2.59572	5.32445e-44
5_23515865	AT5G58110	AT5G58110.1	AT5G58110	+	A	G	0.181009	671	2.70554	5.35981e-44
3_1361563	AT3G04920	AT3G04920.1,AT3G04920.2	RPS24A	+	A	G	0.0145341	153	6.4138	5.76148e-44
1_5711826	AT1G16700	AT1G16700.1	AT1G16700	+	A	G	0.113533	125	16.8648	6.22007e-44
5_6090455	AT5G18380	AT5G18380.2,AT5G18380.1,AT5G18380.3	RPS16C	-	T	C	0.00944494	203	3.81513	6.52355e-44
2_15049812	AT2G35810	AT2G35810.2,AT2G35810.1	AT2G35810	+	A	G	0.080138	209	3.43644	6.53892e-44
1_23669665	AT1G63810	AT1G63810.1,AT1G63810.2	AT1G63810	-	T	C	0.772727	136	4.04886	6.64366e-44
4_16476778	AT4G34450	AT4G34450.1	AT4G34450	+	A	G	0.0435488	161	5.19495	7.54768e-44
2_19345167	AT2G47110	AT2G47110.1,AT2G47110.2	RPS27AB	+	A	G	0.0234785	152	5.87725	8.90419e-44
3_20556089	AT3G55440	AT3G55440.1	CTIMC	+	A	G	0.0132904	190	5.93996	9.78813e-44
1_10471840	AT1G29900	AT1G29900.1	CARB	+	A	G	0.151225	142	5.90852	1.00865e-43
1_2809922	AT1G08780	AT1G08780.1	AIP3	-	T	C	0.301676	162	5.14443	1.08161e-43
5_17194517	AT5G42890	AT5G42890.1	ATSCP2	-	T	C	0.0309903	138	7.40011	1.11538e-43
3_665723	AT3G02950	AT3G02950.1,AT3G02950.2	THO7B	-	T	C	0.282243	151	6.41379	1.29538e-43
1_29803700	AT1G79230	AT1G79230.1,AT1G79230.3,AT1G79230.2	STR1	+	A	G	0.0720372	186	5.48948	1.35626e-43
1_29664126	AT1G78900	AT1G78900.1,AT1G78900.2	VHA-A	+	A	G	0.0255501	245	4.06128	1.39668e-43
1_27244054	AT1G72370	AT1G72370.1,AT1G72370.2	RPSAA	-	T	C	0.0108979	209	3.57337	1.59951e-43
4_16370056	AT4G34180	AT4G34180.1	AT4G34180	-	T	C	0.0568996	254	6.53648	1.61725e-43
2_8807744	AT2G20420	AT2G20420.1	AT2G20420	+	A	G	0.0256365	144	7.37902	1.6556e-43
2_16183252	AT2G38700	AT2G38700.1	MVD1	-	T	C	0.0893522	240	3.36122	2.283e-43
3_19397878	AT3G52300	AT3G52300.1,AT3G52300.2	ATPQ	+	A	G	0.00989563	128	16.6135	2.88382e-43
1_26688423	AT1G70770	AT1G70770.1	AT1G70770	-	T	C	0.147091	134	17.7526	2.98393e-43
3_2824978	AT3G09200	AT3G09200.1,AT3G09200.2	RPP0B	-	T	C	0.0243636	245	3.00649	3.2092e-43
2_18046273	AT2G43460	AT2G43460.1	RPL38B	-	T	C	0.012927	151	6.39546	3.63603e-43
2_15170781	AT2G36160	AT2G36160.1	RPS14A	+	A	G	0.011194	156	5.48236	3.99926e-43
5_10070260	AT5G28060	AT5G28060.1	RPS24B	-	T	C	0.0117827	146	6.41364	4.05341e-43
2_9731040	AT2G22840	AT2G22840.1	GRF1	+	A	G	0.349138	162	4.15217	4.17901e-43
4_14564076	AT4G29735	AT4G29735.1,AT4G29735.2	AT4G29735	-	T	C	0.0377236	175	6.39495	4.18728e-43
3_14231873	AT3G42050	AT3G42050.1	VHA-H	-	T	C	0.0399871	248	2.96623	4.24496e-43
2_12852737	AT2G30110	AT2G30110.1	UBA1	-	T	C	0.077527	158	5.44267	4.38316e-43
4_15669480	AT4G32470	AT4G32470.1,AT4G32470.2	QCR7-1	-	T	C	0.0368407	139	7.37199	4.97415e-43
3_10055997	AT3G27240	AT3G27240.1	CYC11	-	T	C	0.0452278	136	7.40844	5.1768e-43
5_21760346	AT5G53560	AT5G53560.1	CYTB5-E	+	A	G	0.0278481	187	5.52232	5.6298e-43
2_15593702	AT2G37110	AT2G37110.1	AT2G37110	+	A	G	0.0522487	158	5.45241	5.71853e-43
4_14770909	AT4G30190	AT4G30190.1,AT4G30190.2	AHA2	-	T	C	0.0118394	207	4.39261	5.78287e-43
5_26881476	AT5G67380	AT5G67380.1,AT5G67380.2	CKA1	-	T	C	0.0886443	153	4.96073	5.92334e-43
1_4150683	AT1G12230	AT1G12230.1,AT1G12230.2	AT1G12230	+	A	G	0.0828804	122	7.45636	6.71131e-43
5_22716250	AT5G56090	AT5G56090.1	COX15	+	A	G	0.242898	171	4.85652	7.2911e-43
3_20230590	AT3G54660	AT3G54660.1	EMB2360	-	T	C	0.169471	141	5.87238	8.28161e-43
3_1082997	AT3G04120	AT3G04120.1	GAPC1	+	A	G	0.00764891	240	3.28341	9.20018e-43
1_27850004	AT1G74060	AT1G74060.1	RPL6B	-	T	C	0.0421736	156	5.83193	9.32473e-43
4_16568268	AT4G34720	AT4G34720.1,AT4G34720.2	VHA-C3	-	T	C	0.0485568	360	3.59446	9.72376e-43
3_19891903	AT3G53670	AT3G53670.1,AT3G53670.2	AT3G53670	+	A	G	0.079616	141	5.88431	9.81661e-43
2_17625703	AT2G42310	AT2G42310.1	AT2G42310	+	A	G	0.0598039	122	7.44851	9.83475e-43
5_25394729	AT5G63400	AT5G63400.1,AT5G63400.2	ADK1	-	T	C	0.0185108	178	5.19066	1.00383e-42
1_2685313	AT1G08480	AT1G08480.1	SDH6	+	A	G	0.0342795	157	4.94534	1.01739e-42
4_15671020	AT4G32470	AT4G32470.1,AT4G32470.2	QCR7-1	-	T	C	0.0177169	185	4.18543	1.04982e-42
1_28528464	AT1G76010	AT1G76010.1,AT1G76010.2	AT1G76010	-	T	C	0.0360664	150	5.46656	1.05297e-42
2_13412088	AT2G31490	AT2G31490.1	AT2G31490	+	A	G	0.0243003	145	7.34884	1.08114e-42
4_6779335	AT4G11120	AT4G11120.1	EFTS	+	A	G	0.131417	192	3.79228	1.12284e-42
3_19952703	AT3G53870	AT3G53870.1	RPS3B	+	A	G	0.0228629	203	4.13158	1.25809e-42
2_7360703	AT2G16950	AT2G16950.2,AT2G16950.1	TRN1	+	A	G	0.205732	201	5.46216	1.31882e-42
5_3259236	AT5G10360	AT5G10360.1,AT5G10360.2	RPS6B	-	T	C	0.00895091	161	5.17022	1.32345e-42
1_5625493	AT1G16470	AT1G16470.1,AT1G16470.2	PAB1	+	A	G	0.281481	190	7.53649	1.47064e-42
5_25280263	AT5G63000	AT5G63000.1	AT5G63000	-	T	C	0.216853	175	4.13541	1.54119e-42
4_18257849	AT4G39200	AT4G39200.1,AT4G39200.2	RPS25E	+	A	G	0.0101563	234	4.62368	1.55187e-42
3_1604062	AT3G05530	AT3G05530.1	RPT5A	+	A	G	0.0519214	177	4.28972	1.60444e-42
4_293191	AT4G00710	AT4G00710.1,AT4G00710.2	BSK3	+	A	G	0.140541	156	17.1269	1.67914e-42
2_9017394	AT2G20990	AT2G20990.1,AT2G20990.2,AT2G20990.3	SYT1	+	A	G	0.0401059	197	3.56418	2.18689e-42
5_6582199	AT5G19510	AT5G19510.1	AT5G19510	-	T	C	0.0103641	150	5.85741	2.25951e-42
1_19475235	AT1G52300	AT1G52300.1	RPL37B	-	T	C	0.0177384	248	3.60002	2.4732e-42
5_2870331	AT5G09225	AT5G09225.1	AT5G09225	-	T	C	0.214431	211	3.15365	2.57358e-42
1_28594553	AT1G76200	AT1G76200.1	AT1G76200	+	A	G	0.0204672	177	7.48722	2.57427e-42
1_6950067	AT1G20050	AT1G20050.1	HYD1	+	A	G	0.0743243	165	5.87636	2.58657e-42
4_16337663	AT4G34110	AT4G34110.1	PAB2	+	A	G	0.0904336	657	2.97443	2.62066e-42
4_18057353	AT4G38630	AT4G38630.1	RPN10	-	T	C	0.0655738	144	6.38792	2.75916e-42
1_520112	AT1G02500	AT1G02500.1,AT1G02500.2	SAM1	+	A	G	0.0121081	173	6.47777	2.85557e-42
3_19591785	AT3G52850	AT3G52850.1	VSR1	+	A	G	0.127624	152	16.9853	2.8745e-42
5_23516523	AT5G58110	AT5G58110.1	AT5G58110	+	A	G	0.110357	130	16.7035	2.91362e-42
5_19789303	AT5G48810	AT5G48810.1	CYTB5-D	-	T	C	0.0257038	147	5.82902	3.07732e-42
5_24015658	AT5G59613	AT5G59613.2,AT5G59613.1	AT5G59613	-	T	C	0.842774	10088	2.65047	3.32781e-42
4_17133846	AT4G36210	AT4G36210.3,AT4G36210.1,AT4G36210.2	AT4G36210	+	A	G	0.126258	138	6.41189	3.52501e-42
2_7547869	AT2G17360	AT2G17360.1,AT2G17360.2	RPS4A	+	A	G	0.0439904	310	3.60827	3.60783e-42
2_12416271	AT2G28910	AT2G28910.1,AT2G28910.2,AT2G28910.3	CXIP4	-	T	C	0.0337181	222	4.63123	3.687e-42
5_25665316	AT5G64130	AT5G64130.1,AT5G64130.3,AT5G64130.2	AT5G64130	-	T	C	0.0192877	189	3.71425	3.78105e-42
2_14532208	AT2G34470	AT2G34470.1,AT2G34470.2	UREG	-	T	C	0.0736589	184	5.39235	3.98368e-42
3_18536095	AT3G50000	AT3G50000.1	CKA2	+	A	G	0.0992063	250	3.20438	4.07125e-42
1_20066064	AT1G53750	AT1G53750.1	RPT1A	-	T	C	0.0372865	227	3.61229	4.15484e-42
1_24686439	AT1G66240	AT1G66240.1,AT1G66240.2,AT1G66240.3	ATX1	-	T	C	0.020811	214	5.25523	4.26534e-42
1_18929289	AT1G51070	AT1G51070.1,AT1G51070.2	BHLH115	+	A	G	0.0568979	219	4.22327	4.66246e-42
1_5775926	AT1G16880	AT1G16880.1	ACR11	+	A	G	0.129353	208	3.6064	4.67249e-42
3_367152	AT3G02090	AT3G02090.1,AT3G02090.2	MPPBETA	+	A	G	0.0413383	299	2.78549	5.01349e-42
5_22393770	AT5G55190	AT5G55190.1	RAN3	+	A	G	0.0343558	196	4.39143	5.27295e-42
2_9113073	AT2G21290	AT2G21290.1	AT2G21290	+	A	G	0.0637916	213	4.06571	6.04511e-42
5_4787779	AT5G14800	AT5G14800.1,AT5G14800.2	PROC1	-	T	C	0.15412	346	2.71182	6.86068e-42
3_21718840	AT3G58730	AT3G58730.1	VHA-D	-	T	C	0.0359813	154	4.92064	6.87198e-42
4_13107990	AT4G25740	AT4G25740.1,AT4G25740.2	RPS10A	-	T	C	0.0649207	528	2.34678	7.17197e-42
2_14019142	AT2G33040	AT2G33040.1	ATPC	-	T	C	0.0143044	153	5.43035	7.2765e-42
1_19186763	AT1G51730	AT1G51730.1	AT1G51730	-	T	C	0.0875	126	16.355	8.31983e-42
2_18205827	AT2G43970	AT2G43970.1,AT2G43970.2	LARP6B	-	T	C	0.0197242	133	16.4853	8.33376e-42
1_15651160	AT1G41880	AT1G41880.1,AT1G41880.2	RPL35AB	-	T	C	0.165882	141	15.8987	8.52173e-42
3_17453647	AT3G47370	AT3G47370.1,AT3G47370.3,AT3G47370.2	RPS20B	-	T	C	0.0452007	170	16.74	8.72262e-42
2_7554886	AT2G17380	AT2G17380.1	AAP19-1	+	A	G	0.0954064	135	5.84863	9.13338e-42
2_18205452	AT2G43970	AT2G43970.1,AT2G43970.2	LARP6B	-	T	C	0.0530735	177	5.48654	9.34198e-42
1_19128525	AT1G51590	AT1G51590.1,AT1G51590.2	MNS1	-	T	C	0.148622	151	6.33159	1.03882e-41
2_7548140	AT2G17360	AT2G17360.1,AT2G17360.2	RPS4A	+	A	G	0.358649	2007	3.28951	1.06676e-41
4_16618835	AT4G34890	AT4G34890.1	XDH1	-	T	C	0.242545	244	3.72581	1.14568e-41
5_25749703	AT5G64400	AT5G64400.1,AT5G64400.2,AT5G64400.3	AT5G64400	+	A	G	0.0174897	289	4.09343	1.17694e-41
5_26549911	AT5G66510	AT5G66510.1,AT5G66510.2	GAMMACA3	-	T	C	0.0612543	126	15.826	1.19391e-41
1_24440565	AT1G65720	AT1G65720.1	AT1G65720	-	T	C	0.0833009	214	3.86602	1.2732e-41
5_4889488	AT5G15090	AT5G15090.1	VDAC3	-	T	C	0.0895849	123	17.0015	1.27762e-41
4_13557675	AT4G27000	AT4G27000.1	RBP45C	-	T	C	0.0642477	193	3.39837	1.41525e-41
5_19092208	AT5G47030	AT5G47030.1	AT5G47030	+	A	G	0.0788835	130	7.35246	1.43622e-41
1_11195939	AT1G31300	AT1G31300.1,AT1G31300.2,AT1G31300.3	AT1G31300	+	A	G	0.392491	115	6.48682	1.47725e-41
3_5786681	AT3G16950	AT3G16950.1,AT3G16950.2	LPD1	-	T	C	0.144279	145	6.33207	1.50237e-41
3_2587097	AT3G08530	AT3G08530.1	CHC2	-	T	C	0.086728	132	16.3457	1.63908e-41
2_19551462	AT2G47690	AT2G47690.1,AT2G47690.2,AT2G47690.3	AT2G47690	+	A	G	0.0230216	160	6.37671	1.70335e-41
4_16339189	AT4G34110	AT4G34110.1	PAB2	+	A	G	0.118603	1029	3.94054	1.75608e-41
3_1168285	AT3G04400	AT3G04400.1,AT3G04400.2	RPL23C	+	A	G	0.00916442	170	4.53379	1.90576e-41
1_5415183	AT1G15750	AT1G15750.4,AT1G15750.2,AT1G15750.1,AT1G15750.3	TPL	-	T	C	0.103286	132	7.32987	1.9152e-41
5_3409930	AT5G10780	AT5G10780.1,AT5G10780.2	AT5G10780	+	A	G	0.104069	133	6.38459	1.96339e-41
5_12081070	AT5G32450	AT5G32450.1	AT5G32450	+	A	G	0.302	302	2.56201	2.21094e-41
4_16336967	AT4G34110	AT4G34110.1	PAB2	+	A	G	0.0190704	215	3.91327	2.22586e-41
5_2956398	AT5G09510	AT5G09510.1,AT5G09510.2	RPS15D	-	T	C	0.0262417	205	3.57099	2.24609e-41
1_1498363	AT1G05180	AT1G05180.1,AT1G05180.3,AT1G05180.2	AXR1	-	T	C	0.237996	114	16.6474	2.50074e-41
1_2570481	AT1G08190	AT1G08190.1	VPS41	+	A	G	0.204663	395	3.14769	2.57244e-41
5_2582216	AT5G08060	AT5G08060.1	AT5G08060	+	A	G	0.030521	140	7.28379	2.68241e-41
1_18929442	AT1G51070	AT1G51070.1,AT1G51070.2	BHLH115	+	A	G	0.0469653	130	6.38317	2.74386e-41
5_19077669	AT5G47010	AT5G47010.1	UPF1	+	A	G	0.105923	152	4.88529	2.76174e-41
1_3491552	AT1G10580	AT1G10580.1	AT1G10580	-	T	C	0.263056	136	7.39241	2.85713e-41
5_20693035	AT5G50850	AT5G50850.1	PDH2	+	A	G	0.0280983	151	6.3086	3.30796e-41
5_19328655	AT5G47700	AT5G47700.1,AT5G47700.2	RPP1C	-	T	C	0.01243	404	3.12906	3.4705e-41
5_3621091	AT5G11340	AT5G11340.1	AT5G11340	+	A	G	0.1974	167	5.78467	3.52675e-41
2_10243388	AT2G24090	AT2G24090.1	AT2G24090	+	A	G	0.353293	177	3.02682	3.96027e-41
5_9668470	AT5G27380	AT5G27380.1	GSH2	-	T	C	0.142405	270	3.77748	4.02951e-41
3_7424375	AT3G21175	AT3G21175.2,AT3G21175.1	GATA24	+	A	G	0.132942	136	6.35128	4.20517e-41
1_11742750	AT1G32490	AT1G32490.1,AT1G32490.2	ESP3	-	T	C	0.394595	146	5.46812	4.34741e-41
3_20829045	AT3G56130	AT3G56130.1,AT3G56130.2,AT3G56130.5,AT3G56130.3,AT3G56130.4	AT3G56130	+	A	G	0.107036	143	5.78127	4.49633e-41
3_14228553	AT3G42050	AT3G42050.1	VHA-H	-	T	C	0.193772	112	16.8911	4.87251e-41
2_18249222	AT2G44120	AT2G44120.1,AT2G44120.2	RPL7C	-	T	C	0.0615735	216	6.44366	7.18432e-41
3_2606602	AT3G08580	AT3G08580.2,AT3G08580.1	AAC1	-	T	C	0.00619094	171	4.19272	7.69904e-41
3_3624542	AT3G11510	AT3G11510.1	RPS14B	-	T	C	0.0410214	249	3.01527	7.84723e-41
5_24016510	AT5G59613	AT5G59613.2	AT5G59613	-	T	C	0.0208157	172	4.36208	8.55747e-41
4_11759397	AT4G22220	AT4G22220.1	ISU1	-	T	C	0.0556263	131	15.6999	9.91412e-41
1_23834984	AT1G64230	AT1G64230.1,AT1G64230.2,AT1G64230.5,AT1G64230.3,AT1G64230.4	UBC28	+	A	G	0.0145185	131	6.36235	1.16361e-40
2_14144069	AT2G33370	AT2G33370.1,AT2G33370.2	RPL23C	-	T	C	0.0208827	194	3.58325	1.27542e-40
4_6398427	AT4G10320	AT4G10320.1	AT4G10320	-	T	C	0.164272	263	4.15858	1.28362e-40
4_17000324	AT4G35890	AT4G35890.1,AT4G35890.2	LARP1C	+	A	G	0.251445	261	3.04852	1.29109e-40
5_3332213	AT5G10540	AT5G10540.1	CYOP	+	A	G	0.0728879	132	16.993	1.30737e-40
5_6764393	AT5G20020	AT5G20020.1	RAN2	+	A	G	0.0409039	143	6.29845	1.40457e-40
5_6268331	AT5G18800	AT5G18800.2,AT5G18800.1	AT5G18800	+	A	G	0.03669	231	5.41936	1.50571e-40
3_9270661	AT3G25520	AT3G25520.1,AT3G25520.3	ATL5	-	T	C	0.0240673	289	2.70541	1.62234e-40
5_23032207	AT5G56940	AT5G56940.1	AT5G56940	+	A	G	0.149199	121	15.7685	1.66922e-40
3_2823430	AT3G09200	AT3G09200.1,AT3G09200.2	RPP0B	-	T	C	0.0156642	181	4.00433	1.70896e-40
4_16700882	AT4G35090	AT4G35090.1,AT4G35090.2,AT4G35090.3	CAT2	-	T	C	0.0640652	220	5.10972	1.79403e-40
1_1141834	AT1G04270	AT1G04270.1,AT1G04270.2	RPS15A	-	T	C	0.0203541	146	5.74977	1.83362e-40
5_25393270	AT5G63400	AT5G63400.1,AT5G63400.2	ADK1	-	T	C	0.0274094	155	5.77146	1.89023e-40
1_10831884	AT1G30580	AT1G30580.1	AT1G30580	-	T	C	0.706105	1862	3.14357	2.06626e-40
1_229885	AT1G01630	AT1G01630.1	AT1G01630	+	A	G	0.10089	204	4.15992	2.07917e-40
1_5727799	AT1G16740	AT1G16740.1	AT1G16740	+	A	G	0.0833333	129	16.2407	2.09533e-40
4_1295584	AT4G02930	AT4G02930.1	TUFA	-	T	C	0.138693	138	7.26054	2.24049e-40
5_13765374	AT5G35590	AT5G35590.1	PAA1	-	T	C	0.0536746	130	15.554	2.27806e-40
2_16710040	AT2G40010	AT2G40010.1	RPP0A	-	T	C	0.509165	250	2.60576	2.93623e-40
4_14084977	AT4G28510	AT4G28510.1	PHB1	-	T	C	0.154776	128	7.29523	3.18273e-40
2_16475626	AT2G39460	AT2G39460.1,AT2G39460.2	RPL23AA	+	A	G	0.0202975	247	3.24281	3.21713e-40
3_20595823	AT3G55530	AT3G55530.1	SDIR1	-	T	C	0.20283	129	6.33358	3.84332e-40
3_22269586	AT3G60245	AT3G60245.1	RPL37AC	+	A	G	0.0258932	524	3.32666	4.34353e-40
5_3791311	AT5G11770	AT5G11770.1	AT5G11770	-	T	C	0.328556	3714	2.55637	4.65777e-40
1_2942847	AT1G09140	AT1G09140.1,AT1G09140.2,AT1G09140.3	SR30	-	T	C	0.190625	122	6.36917	4.83411e-40
4_17542048	AT4G37270	AT4G37270.1	HMA1	-	T	C	0.237838	132	6.33809	5.60404e-40
1_20356657	AT1G54490	AT1G54490.1,AT1G54490.2	XRN4	+	A	G	0.310782	147	5.75909	5.60743e-40
2_1894696	AT2G05220	AT2G05220.1,AT2G05220.2	RPS17B	-	T	C	0.0548303	126	15.608	9.31214e-40
2_14075351	AT2G33210	AT2G33210.1,AT2G33210.2	HSP60-2	-	T	C	0.0761693	171	4.98298	9.74609e-40
4_1073996	AT4G02450	AT4G02450.1,AT4G02450.2	AT4G02450	-	T	C	0.0301698	199	4.77823	1.0726e-39
4_16476700	AT4G34450	AT4G34450.1	AT4G34450	+	A	G	0.0302503	139	6.25879	1.26576e-39
2_13383538	AT2G31390	AT2G31390.1	AT2G31390	-	T	C	0.0525563	147	5.33118	1.34666e-39
1_28593421	AT1G76200	AT1G76200.1	AT1G76200	+	A	G	0.0101841	135	6.30743	1.43275e-39
2_14079674	AT2G33220	AT2G33220.1,AT2G33220.2	AT2G33220	+	A	G	0.0263719	136	5.74602	1.46168e-39
1_18059836	AT1G48830	AT1G48830.1,AT1G48830.2	RPS7A	-	T	C	0.0615229	122	15.8076	1.56641e-39
2_14532395	AT2G34470	AT2G34470.1,AT2G34470.2	UREG	-	T	C	0.136522	157	4.60198	1.74395e-39
5_2827655	AT5G08690	AT5G08690.1	AT5G08690	+	A	G	0.0313658	381	2.85093	1.90286e-39
2_7548085	AT2G17360	AT2G17360.1,AT2G17360.2	RPS4A	+	A	G	0.0213441	148	5.32917	1.93479e-39
1_23833646	AT1G64230	AT1G64230.1,AT1G64230.2,AT1G64230.5,AT1G64230.3,AT1G64230.4	UBC28	+	A	G	0.0195047	115	15.5966	2.06937e-39
5_19091926	AT5G47030	AT5G47030.1	AT5G47030	+	A	G	0.0329131	201	3.99163	2.08332e-39
4_16405052	AT4G34270	AT4G34270.1	AT4G34270	-	T	C	0.184615	132	5.75715	2.12667e-39
3_87605	AT3G01280	AT3G01280.1	VDAC1	+	A	G	0.0183097	125	17.44	2.31293e-39
2_7843711	AT2G18040	AT2G18040.1	PIN1	+	A	G	0.0639505	124	6.31282	2.51316e-39
4_13745815	AT4G27500	AT4G27500.1	PPI1	+	A	G	0.0428054	130	7.24358	2.62587e-39
2_10383040	AT2G24420	AT2G24420.1,AT2G24420.2	AT2G24420	+	A	G	0.193396	123	5.80416	2.97774e-39
3_783651	AT3G03330	AT3G03330.1	AT3G03330	-	T	C	0.38657	213	2.5814	3.14577e-39
1_4454647	AT1G13060	AT1G13060.1,AT1G13060.3,AT1G13060.2	PBE1	+	A	G	0.0366368	139	7.20332	3.2588e-39
1_10181896	AT1G29150	AT1G29150.1,AT1G29150.2	RPN6	+	A	G	0.0898204	195	3.38217	3.60314e-39
1_608274	AT1G02780	AT1G02780.1	RPL19A	-	T	C	0.00712672	164	4.21816	4.13933e-39
3_4562090	AT3G13860	AT3G13860.1	HSP60-3A	-	T	C	0.154497	201	4.42371	4.28646e-39
3_5786636	AT3G16950	AT3G16950.1,AT3G16950.2	LPD1	-	T	C	0.160714	126	6.28992	4.36016e-39
1_1056269	AT1G04080	AT1G04080.1,AT1G04080.3,AT1G04080.2,AT1G04080.5,AT1G04080.4	PRP39	+	A	G	0.219226	187	4.7333	5.06561e-39
5_3053939	AT5G09810	AT5G09810.1	ACT7	+	A	G	0.0433369	320	2.6209	5.38746e-39
5_20693044	AT5G50850	AT5G50850.1	PDH2	+	A	G	0.0251919	128	15.8519	5.70959e-39
3_6132732	AT3G17900	AT3G17900.1,AT3G17900.2	AT3G17900	+	A	G	0.25	136	4.82412	5.74119e-39
1_23743108	AT1G63980	AT1G63980.1,AT1G63980.2	AT1G63980	+	A	G	0.416856	183	7.37588	6.06329e-39
5_19092076	AT5G47030	AT5G47030.1	AT5G47030	+	A	G	0.0429133	142	16.7136	6.22901e-39
1_7954235	AT1G22520	AT1G22520.1,AT1G22520.2	AT1G22520	-	T	C	0.162355	477	2.69914	6.50906e-39
4_14486275	AT4G29480	AT4G29480.1	AT4G29480	-	T	C	0.0324365	129	7.24935	6.80904e-39
4_15252245	AT4G31430	AT4G31430.2,AT4G31430.3,AT4G31430.1	KAKU4	+	A	G	0.256536	157	3.93961	7.02992e-39
3_4592570	AT3G13920	AT3G13920.1,AT3G13920.3,AT3G13920.2,AT3G13920.5	TIF4A-1	-	T	C	0.0248763	191	6.46082	7.06108e-39
3_5669702	AT3G16640	AT3G16640.1	TCTP	-	T	C	0.00746125	155	4.40406	7.10549e-39
4_18149000	AT4G38920	AT4G38920.1,AT4G38920.2	VHA-C3	+	A	G	0.0200315	127	7.21412	7.31561e-39
3_10281688	AT3G27740	AT3G27740.1,AT3G27740.2	CARA	-	T	C	0.161313	226	3.43093	7.64243e-39
4_1441449	AT4G03280	AT4G03280.1,AT4G03280.2	PETC	+	A	G	0.338916	344	2.17884	7.89294e-39
2_9071063	AT2G21170	AT2G21170.1,AT2G21170.2,AT2G21170.3	TIM	-	T	C	0.0399433	141	17.1795	1.01782e-38
5_6657378	AT5G19690	AT5G19690.1,AT5G19690.2	STT3A	+	A	G	0.0456931	148	5.28855	1.03525e-38
1_18594225	AT1G50200	AT1G50200.1,AT1G50200.2	ALATS	-	T	C	0.067325	150	4.60746	1.15927e-38
3_20563063	AT3G55460	AT3G55460.1	SCL30	+	A	G	0.0378938	172	4.15488	1.18322e-38
4_16336815	AT4G34110	AT4G34110.1	PAB2	+	A	G	0.0124443	134	5.71873	1.2423e-38
1_6350148	AT1G18450	AT1G18450.1	ARP4	+	A	G	0.36371	451	2.18298	1.33246e-38
2_18205468	AT2G43970	AT2G43970.1,AT2G43970.2	LARP6B	-	T	C	0.0320794	139	5.69979	1.38495e-38
5_22350514	AT5G55070	AT5G55070.1	AT5G55070	+	A	G	0.0803515	128	7.20451	1.4092e-38
3_8514598	AT3G23660	AT3G23660.1,AT3G23660.2	AT3G23660	-	T	C	0.309816	202	2.95039	1.53406e-38
4_9027561	AT4G15900	AT4G15900.1	PRL1	+	A	G	0.225225	125	7.28405	1.71527e-38
1_7020240	AT1G20260	AT1G20260.1	VHA-B3	+	A	G	0.0328789	123	7.22951	1.74307e-38
1_29206948	AT1G77710	AT1G77710.1	AT1G77710	+	A	G	0.0237299	142	6.20868	1.81413e-38
2_12416303	AT2G28910	AT2G28910.1,AT2G28910.2,AT2G28910.3	CXIP4	-	T	C	0.0304923	166	6.22077	1.83864e-38
3_4684739	AT3G14120	AT3G14120.2,AT3G14120.1,AT3G14120.3	NUP107	+	A	G	0.279805	115	16.8518	2.03197e-38
5_10069792	AT5G28060	AT5G28060.1	RPS24B	-	T	C	0.0291511	250	5.14422	2.09431e-38
4_6174935	AT4G09800	AT4G09800.1	RPS18A	+	A	G	0.0299219	157	7.21304	2.12678e-38
1_2404272	AT1G07750	AT1G07750.1	AT1G07750	-	T	C	0.0528116	139	6.22482	2.2401e-38
2_19598260	AT2G47850	AT2G47850.1,AT2G47850.3,AT2G47850.2,AT2G47850.4	AT2G47850	+	A	G	0.431452	107	7.36317	2.29739e-38
4_16374042	AT4G34200	AT4G34200.1	PGDH1	-	T	C	0.0413271	142	5.29458	2.37104e-38
5_4935795	AT5G15200	AT5G15200.1,AT5G15200.2	RPS9B	-	T	C	0.010434	188	3.7828	2.42369e-38
2_15170712	AT2G36160	AT2G36160.1	RPS14A	+	A	G	0.0110795	187	3.62073	2.42602e-38
3_14228651	AT3G42050	AT3G42050.1	VHA-H	-	T	C	0.0784795	128	16.2456	2.59874e-38
1_21073191	AT1G56280	AT1G56280.1,AT1G56280.2	ATDI19	-	T	C	0.0210733	161	4.43683	2.84958e-38
1_30007666	AT1G79750	AT1G79750.1	NADP-ME4	-	T	C	0.0465632	126	6.24793	3.00046e-38
2_18205966	AT2G43970	AT2G43970.1,AT2G43970.2	LARP6B	-	T	C	0.0244305	148	5.25263	3.12509e-38
4_15671035	AT4G32470	AT4G32470.1,AT4G32470.2	QCR7-1	-	T	C	0.0156408	155	5.70301	3.2129e-38
1_2460613	AT1G07930	AT1G07930.1,AT1G07930.2	A3	+	A	G	0.0398783	118	16.5965	3.56097e-38
5_1322024	AT5G04590	AT5G04590.1	SIR	+	A	G	0.0321087	215	4.37638	3.59068e-38
5_5989046	AT5G18110	AT5G18110.1	NCBP	-	T	C	0.0749014	114	16.1413	3.98012e-38
4_13944220	AT4G28060	AT4G28060.1	COX6B-3	-	T	C	0.0510422	311	2.04195	4.02188e-38
4_10888501	AT4G20150	AT4G20150.1	AT4G20150	-	T	C	0.0169329	141	5.69257	4.12543e-38
2_16184811	AT2G38710	AT2G38710.1,AT2G38710.3,AT2G38710.2,AT2G38710.4	AT2G38710	-	T	C	0.0630473	144	6.27441	4.68681e-38
4_6733264	AT4G11010	AT4G11010.1	NDPK3	-	T	C	0.104351	1024	2.59635	4.85505e-38
2_15581551	AT2G37080	AT2G37080.3,AT2G37080.1,AT2G37080.2	ICR2	-	T	C	0.421053	96	16.4016	5.01511e-38
4_18011798	AT4G38510	AT4G38510.2,AT4G38510.3,AT4G38510.4,AT4G38510.5,AT4G38510.1	VHA-B2	-	T	C	0.0508091	157	5.30109	5.10519e-38
1_28855522	AT1G76860	AT1G76860.1	LSM3B	-	T	C	0.044615	186	5.76599	5.17883e-38
2_13412992	AT2G31490	AT2G31490.1	AT2G31490	+	A	G	0.0161208	127	7.16946	5.18938e-38
3_19506699	AT3G52590	AT3G52590.1	RPL40B	+	A	G	0.0197722	151	4.76665	5.26001e-38
4_6559097	AT4G10610	AT4G10610.1,AT4G10610.2	CID12	+	A	G	0.225607	548	3.1219	5.30324e-38
1_539832	AT1G02560	AT1G02560.1	CLPP5	+	A	G	0.12296	113	7.2582	5.81137e-38
4_17341314	AT4G36800	AT4G36800.1,AT4G36800.2	RCE1	-	T	C	0.0770048	145	5.72989	6.49755e-38
3_22657964	AT3G61200	AT3G61200.1	AT3G61200	-	T	C	0.0546134	190	3.49042	6.86049e-38
3_21638943	AT3G58500	AT3G58500.1	PP2A3	-	T	C	0.0443396	141	4.60533	6.95119e-38
3_2917618	AT3G09500	AT3G09500.1	RPL35A	+	A	G	0.0076152	177	4.26365	6.97458e-38
1_19128316	AT1G51590	AT1G51590.1,AT1G51590.2	MNS1	-	T	C	0.311828	145	17.1002	7.49144e-38
1_9172454	AT1G26550	AT1G26550.1	AT1G26550	+	A	G	0.255263	2801	2.61093	7.87283e-38
4_15669668	AT4G32470	AT4G32470.1,AT4G32470.2	QCR7-1	-	T	C	0.0103751	130	6.21629	8.57959e-38
5_17159507	AT5G42790	AT5G42790.1	PAF1	-	T	C	0.0496454	168	4.01158	8.7026e-38
2_10609674	AT2G24940	AT2G24940.1	MP3	+	A	G	0.04269	478	2.40559	8.83219e-38
2_17952962	AT2G43160	AT2G43160.2,AT2G43160.3,AT2G43160.1,AT2G43160.5,AT2G43160.4	EPSIN2	+	A	G	0.0894942	184	3.85106	8.9642e-38
1_6800180	AT1G19660	AT1G19660.1,AT1G19660.2,AT1G19660.3	BBD2	-	T	C	0.124563	107	15.5384	9.3164e-38
5_6851884	AT5G20290	AT5G20290.1	RPS8A	-	T	C	0.086727	1610	2.78782	9.50041e-38
4_6174667	AT4G09800	AT4G09800.1	RPS18A	+	A	G	0.0155137	159	5.04281	9.64773e-38
5_26009942	AT5G65110	AT5G65110.1,AT5G65110.2	ACX2	-	T	C	0.0617792	150	5.67908	1.01724e-37
2_19555019	AT2G47710	AT2G47710.1	AT2G47710	-	T	C	0.162285	179	6.25769	1.03873e-37
4_8549631	AT4G14960	AT4G14960.2,AT4G14960.1	TUBA6	-	T	C	0.0272208	429	2.07814	1.05254e-37
1_404268	AT1G02140	AT1G02140.1	MEE63	-	T	C	0.033805	301	2.79991	1.08128e-37
3_19652097	AT3G52990	AT3G52990.1,AT3G52990.2	AT3G52990	+	A	G	0.0375715	151	4.74174	1.13998e-37
3_39345	AT3G01120	AT3G01120.1	CGS1	-	T	C	0.055722	186	3.27848	1.26528e-37
1_28854087	AT1G76850	AT1G76850.1	SEC5A	+	A	G	0.11813	144	4.96906	1.31122e-37
2_11051036	AT2G25910	AT2G25910.1,AT2G25910.2	AT2G25910	-	T	C	0.0761308	170	3.93239	1.37528e-37
4_1295558	AT4G02930	AT4G02930.1	TUFA	-	T	C	0.141447	129	7.14896	1.43679e-37
2_9071895	AT2G21170	AT2G21170.1,AT2G21170.2,AT2G21170.3	TIM	-	T	C	0.0460905	168	4.60163	1.49351e-37
4_12819720	AT4G24920	AT4G24920.2,AT4G24920.1	SEC61G2	-	T	C	0.034632	160	4.71766	1.52492e-37
5_26881686	AT5G67380	AT5G67380.1,AT5G67380.2	CKA1	-	T	C	0.102017	172	4.32844	1.55642e-37
3_2615632	AT3G08610	AT3G08610.1	AT3G08610	-	T	C	0.019751	138	5.29966	1.59462e-37
1_27912692	AT1G74210	AT1G74210.1	GDPD5	+	A	G	0.213043	147	4.7591	1.62958e-37
4_9427200	AT4G16760	AT4G16760.1,AT4G16760.2	ACX1	-	T	C	0.130616	282	2.89723	1.63831e-37
1_28627102	AT1G76300	AT1G76300.1	SMD3A	+	A	G	0.136364	186	3.68872	1.64409e-37
2_2927527	AT2G07050	AT2G07050.1,AT2G07050.2	CAS1	+	A	G	0.180672	172	3.45465	1.72182e-37
4_13554942	AT4G27000	AT4G27000.1	RBP45C	-	T	C	0.0473251	138	5.27273	1.74046e-37
1_18928910	AT1G51070	AT1G51070.1,AT1G51070.2	BHLH115	+	A	G	0.0226319	124	16.3804	1.81851e-37
1_21073924	AT1G56280	AT1G56280.1,AT1G56280.2	ATDI19	-	T	C	0.00772491	113	7.23049	1.90959e-37
1_23758632	AT1G64040	AT1G64040.1	TOPP3	-	T	C	0.0746356	128	6.20219	1.93627e-37
1_3536522	AT1G10670	AT1G10670.1,AT1G10670.2,AT1G10670.4,AT1G10670.3	ACLA-1	+	A	G	0.0355423	155	4.54324	2.06187e-37
3_4766192	AT3G14290	AT3G14290.1	PAE2	+	A	G	0.0674049	140	7.14095	2.0867e-37
5_22820475	AT5G56350	AT5G56350.1	AT5G56350	-	T	C	0.0458743	154	4.92652	2.16923e-37
2_18863324	AT2G45820	AT2G45820.1	DBP	-	T	C	0.0501383	145	4.078	2.17382e-37
1_3154994	AT1G09740	AT1G09740.2,AT1G09740.1	AT1G09740	+	A	G	0.0247243	204	5.23594	2.28927e-37
1_22358229	AT1G60730	AT1G60730.1,AT1G60730.2	AT1G60730	-	T	C	0.100275	146	7.19028	2.61498e-37
5_4978834	AT5G15320	AT5G15320.1,AT5G15320.2	AT5G15320	+	A	G	0.103806	120	16.5643	2.65686e-37
2_9113064	AT2G21290	AT2G21290.1	AT2G21290	+	A	G	0.0406365	143	7.18056	2.69263e-37
1_9527883	AT1G27435	AT1G27435.1	AT1G27435	-	T	C	0.0450886	112	15.375	2.79721e-37
1_8224321	AT1G23190	AT1G23190.1	PGM3	+	A	G	0.100749	121	17.5241	2.88702e-37
1_8242728	AT1G23220	AT1G23220.1	AT1G23220	+	A	G	0.416499	207	2.46761	2.92343e-37
3_8729682	AT3G24170	AT3G24170.3,AT3G24170.1,AT3G24170.2	ATGR1	-	T	C	0.0683486	149	7.11207	3.15261e-37
1_22144441	AT1G60070	AT1G60070.1,AT1G60070.2	AT1G60070	-	T	C	0.141403	125	6.19874	3.38858e-37
5_23620216	AT5G58420	AT5G58420.1	RPS4D	+	A	G	0.0185236	204	3.13545	3.50014e-37
2_13368779	AT2G31350	AT2G31350.1,AT2G31350.2,AT2G31350.3	GLX2-5	+	A	G	0.290417	397	1.62315	3.90967e-37
4_12708813	AT4G24620	AT4G24620.1,AT4G24620.2	PGI1	-	T	C	0.330532	118	5.29963	4.09485e-37
5_21334533	AT5G52560	AT5G52560.1	USP	+	A	G	0.370787	132	4.55463	4.22785e-37
5_6851717	AT5G20290	AT5G20290.1	RPS8A	-	T	C	0.00805174	122	6.23252	4.38092e-37
5_6803985	AT5G20160	AT5G20160.1,AT5G20160.2	AT5G20160	-	T	C	0.280084	398	4.12226	4.51697e-37
2_17591571	AT2G42210	AT2G42210.1,AT2G42210.3,AT2G42210.4,AT2G42210.2,AT2G42210.5	OEP163	+	A	G	0.0331984	123	5.67791	4.53466e-37
1_10993485	AT1G30880	AT1G30880.1,AT1G30880.2	AT1G30880	-	T	C	0.0283327	139	4.9661	4.69625e-37
3_18504754	AT3G49910	AT3G49910.1	RPL26A	+	A	G	0.0243709	215	4.00604	4.77818e-37
3_19506553	AT3G52590	AT3G52590.1	RPL40B	+	A	G	0.00878362	145	5.0295	5.1506e-37
1_5203508	AT1G15120	AT1G15120.1,AT1G15120.2	AT1G15120	+	A	G	0.0190211	164	4.38324	5.51758e-37
5_16610071	AT5G41520	AT5G41520.1,AT5G41520.2	RPS10B	-	T	C	0.0275161	260	3.90761	6.03309e-37
4_18071990	AT4G38680	AT4G38680.1	CSP2	-	T	C	0.0494543	145	16.9311	7.06739e-37
2_11699718	AT2G27350	AT2G27350.2,AT2G27350.3,AT2G27350.1,AT2G27350.6,AT2G27350.5,AT2G27350.4	AT2G27350	-	T	C	0.268354	106	16.8184	8.08017e-37
1_3154745	AT1G09740	AT1G09740.2,AT1G09740.1	AT1G09740	+	A	G	0.0815437	1010	3.63742	8.46465e-37
1_8080063	AT1G22840	AT1G22840.1,AT1G22840.2	CYTC-1	+	A	G	0.0152903	222	3.75072	9.33111e-37
4_38150	AT4G00100	AT4G00100.1	RPS13B	+	A	G	0.0221957	130	6.15332	9.79134e-37
5_25749780	AT5G64400	AT5G64400.1,AT5G64400.2,AT5G64400.3	AT5G64400	+	A	G	0.0138532	178	5.61483	1.01616e-36
2_16918504	AT2G40510	AT2G40510.1	RPS26B	+	A	G	0.0468942	191	5.25417	1.13525e-36
5_2203016	AT5G07090	AT5G07090.1,AT5G07090.2,AT5G07090.3	RPS4B	+	A	G	0.0260905	256	2.96385	1.36864e-36
5_14534999	AT5G36880	AT5G36880.1,AT5G36880.2,AT5G36880.3,AT5G36880.4,AT5G36880.6,AT5G36880.5	ACS	-	T	C	0.0752744	144	4.37766	1.49452e-36
2_17460795	AT2G41840	AT2G41840.1	RPS2C	-	T	C	0.0104598	187	3.37415	1.51804e-36
5_209228	AT5G01530	AT5G01530.1	LHCB4.1	+	A	G	0.108303	270	2.95497	1.61291e-36
4_979339	AT4G02230	AT4G02230.1	RPL19C	-	T	C	0.0811189	116	7.17664	1.63246e-36
5_22057258	AT5G54310	AT5G54310.1	AGD5	-	T	C	0.159126	102	15.936	1.64354e-36
3_1362145	AT3G04920	AT3G04920.1,AT3G04920.2	RPS24A	+	A	G	0.0329277	138	5.22378	1.75176e-36
1_27540666	AT1G73230	AT1G73230.1	AT1G73230	-	T	C	0.0277922	214	3.56648	1.7692e-36
3_22611708	AT3G61110	AT3G61110.1	RPS27B	+	A	G	0.0274983	205	3.06184	1.8346e-36
5_19091814	AT5G47030	AT5G47030.1	AT5G47030	+	A	G	0.01589	119	6.19675	1.83995e-36
5_23672433	AT5G58560	AT5G58560.1	AT5G58560	+	A	G	0.0782059	136	4.72103	1.85559e-36
2_8459279	AT2G19520	AT2G19520.1	MSI4	+	A	G	0.115884	116	7.14412	1.96138e-36
1_21899277	AT1G59610	AT1G59610.1	DRP2B	+	A	G	0.103406	170	4.50386	1.96494e-36
5_18503797	AT5G45620	AT5G45620.1,AT5G45620.2	RPN9A	+	A	G	0.151739	144	15.7547	2.15894e-36
1_4377451	AT1G12840	AT1G12840.1	VHA-C	+	A	G	0.0340345	144	4.54522	2.33208e-36
3_2616482	AT3G08610	AT3G08610.1	AT3G08610	-	T	C	0.0128117	131	6.13282	2.34992e-36
3_3400581	AT3G10860	AT3G10860.1,AT3G10860.2	AT3G10860	+	A	G	0.0174556	118	7.13356	2.40781e-36
5_14135913	AT5G35980	AT5G35980.1,AT5G35980.3	YAK1	+	A	G	0.136605	103	15.6866	2.69065e-36
3_16010801	AT3G44330	AT3G44330.1	AT3G44330	+	A	G	0.0928626	121	7.12487	2.89757e-36
4_18214629	AT4G39080	AT4G39080.1	VHA-A3	+	A	G	0.0420561	144	7.2129	2.96923e-36
4_240842	AT4G00560	AT4G00560.1,AT4G00560.2,AT4G00560.4,AT4G00560.3	AT4G00560	-	T	C	0.269807	126	6.16176	3.15823e-36
2_7159798	AT2G16510	AT2G16510.1	VHA-C3	-	T	C	0.119072	118	6.18647	3.20884e-36
1_21073734	AT1G56280	AT1G56280.1,AT1G56280.2	ATDI19	-	T	C	0.00807339	132	6.21257	3.22029e-36
2_7566377	AT2G17420	AT2G17420.1,AT2G17420.2	NTRA	+	A	G	0.0298592	106	17.2245	3.34748e-36
1_8080282	AT1G22840	AT1G22840.1,AT1G22840.2	CYTC-1	+	A	G	0.0157517	134	5.227	3.71868e-36
4_6947789	AT4G11420	AT4G11420.1	TIF3A1	-	T	C	0.062975	116	15.8024	4.04671e-36
1_4638988	AT1G13560	AT1G13560.1,AT1G13560.3,AT1G13560.2	AAPT1	-	T	C	0.095941	104	17.1231	4.24071e-36
3_5908295	AT3G17300	AT3G17300.1,AT3G17300.2,AT3G17300.3	AT3G17300	+	A	G	0.0599845	155	4.47173	4.44172e-36
5_16315452	AT5G40770	AT5G40770.1	PHB3	-	T	C	0.0579022	122	7.09123	4.6276e-36
1_26112070	AT1G69460	AT1G69460.1	AT1G69460	-	T	C	0.0630229	113	7.16333	4.67054e-36
3_705835	AT3G03100	AT3G03100.1,AT3G03100.2	AT3G03100	-	T	C	0.0260859	215	4.74608	4.7628e-36
2_8512995	AT2G19730	AT2G19730.1,AT2G19730.2,AT2G19730.3	RPL28A	+	A	G	0.0220211	146	5.23245	4.80941e-36
1_28266458	AT1G75330	AT1G75330.1	OTC	-	T	C	0.0791408	140	4.93748	4.87468e-36
4_307950	AT4G00740	AT4G00740.2,AT4G00740.1	AT4G00740	-	T	C	0.109139	123	4.76384	4.92893e-36
3_3400501	AT3G10860	AT3G10860.1,AT3G10860.2	AT3G10860	+	A	G	0.0102851	162	5.36144	5.04503e-36
4_252176	AT4G00585	AT4G00585.1	AT4G00585	-	T	C	0.0204082	150	4.9694	5.1749e-36
1_9527944	AT1G27435	AT1G27435.1	AT1G27435	-	T	C	0.0348989	107	16.4208	5.42298e-36
4_458245	AT4G01050	AT4G01050.1,AT4G01050.2	STR4	+	A	G	0.30303	100	6.29342	5.65791e-36
2_14464683	AT2G34250	AT2G34250.1,AT2G34250.2,AT2G34250.3	AT2G34250	+	A	G	0.0436494	122	5.62228	5.73483e-36
4_15669533	AT4G32470	AT4G32470.1,AT4G32470.2	QCR7-1	-	T	C	0.0228426	117	7.10286	6.78966e-36
3_20636147	AT3G55620	AT3G55620.1	EIF6-2	+	A	G	0.100998	243	2.97666	7.21276e-36
5_26062448	AT5G65220	AT5G65220.1	RPL29	+	A	G	0.280773	276	2.85417	7.25177e-36
3_8729706	AT3G24170	AT3G24170.3,AT3G24170.1,AT3G24170.2	ATGR1	-	T	C	0.0468145	133	17.2826	7.50219e-36
3_3482494	AT3G11130	AT3G11130.1	CHC1	-	T	C	0.0474671	119	6.15588	8.1329e-36
1_28612274	AT1G76260	AT1G76260.1	DWA2	+	A	G	0.641667	385	2.48986	8.84721e-36
5_26080446	AT5G65260	AT5G65260.1	PABN2	-	T	C	0.244589	113	7.20319	8.97129e-36
3_10779962	AT3G28715	AT3G28715.1,AT3G28715.2	VHA-D2	+	A	G	0.0633397	132	4.71934	9.19025e-36
1_8905636	AT1G25380	AT1G25380.2,AT1G25380.1	NDT2	+	A	G	0.174152	190	2.91561	9.28908e-36
3_6453662	AT3G18740	AT3G18740.1	RPL30C	+	A	G	0.0111767	159	4.69648	9.4509e-36
5_18397823	AT5G45390	AT5G45390.1	CLPP4	+	A	G	0.0847907	160	5.25034	9.61239e-36
5_2827982	AT5G08690	AT5G08690.1	AT5G08690	+	A	G	0.0254946	183	3.13198	9.69956e-36
1_21430068	AT1G57860	AT1G57860.1	RPL21F	-	T	C	0.0852995	188	4.32911	9.86524e-36
4_16986705	AT4G35850	AT4G35850.1	AT4G35850	+	A	G	0.166667	105	7.19404	9.98075e-36
3_19885742	AT3G53630	AT3G53630.1,AT3G53630.2	AT3G53630	+	A	G	0.164964	113	7.15405	1.01155e-35
1_28573913	AT1G76140	AT1G76140.1,AT1G76140.2	AT1G76140	+	A	G	0.148559	201	3.50925	1.04384e-35
5_26550095	AT5G66510	AT5G66510.1,AT5G66510.2	GAMMACA3	-	T	C	0.0263859	109	16.5647	1.06052e-35
2_9071619	AT2G21170	AT2G21170.1,AT2G21170.2,AT2G21170.3	TIM	-	T	C	0.0373199	171	4.02171	1.07294e-35
2_13416939	AT2G31510	AT2G31510.1,AT2G31510.2,AT2G31510.3	ARI7	-	T	C	0.217786	120	5.60737	1.11589e-35
1_17321550	AT1G47260	AT1G47260.1	GAMMACA2	-	T	C	0.0162636	117	7.09695	1.11806e-35
1_20576771	AT1G55150	AT1G55150.1,AT1G55150.2	RH20	+	A	G	0.48227	204	2.39992	1.18953e-35
2_19483861	AT2G47470	AT2G47470.1,AT2G47470.3,AT2G47470.4,AT2G47470.2	PDIL2-1	+	A	G	0.15	123	5.59436	1.23789e-35
1_1230607	AT1G04510	AT1G04510.1,AT1G04510.2	PRP19A	+	A	G	0.115189	113	7.12629	1.27477e-35
5_25735096	AT5G64350	AT5G64350.1	FKBP12	-	T	C	0.00981909	165	4.38828	1.35977e-35
3_6096391	AT3G17810	AT3G17810.1	PYD1	+	A	G	0.0486414	145	17.4187	1.37887e-35
5_4531838	AT5G14040	AT5G14040.1	MPT3	-	T	C	0.0142383	133	5.22124	1.3839e-35
5_23271427	AT5G57440	AT5G57440.1	GPP2	-	T	C	0.261176	111	5.67003	1.58618e-35
5_26656507	AT5G66760	AT5G66760.1	SDH1-1	+	A	G	0.0210526	164	3.76934	1.63081e-35
1_5592962	AT1G16350	AT1G16350.1	AT1G16350	+	A	G	0.326047	179	3.16744	1.74386e-35
2_17025493	AT2G40800	AT2G40800.1,AT2G40800.2	AT2G40800	-	T	C	0.174054	161	3.57995	1.74401e-35
5_6845447	AT5G20280	AT5G20280.1	SPS1	-	T	C	0.182667	137	5.57095	1.74907e-35
3_22154334	AT3G59970	AT3G59970.3,AT3G59970.1,AT3G59970.2	MTHFR1	+	A	G	0.0534737	127	5.56792	1.83462e-35
3_2917682	AT3G09500	AT3G09500.1	RPL35A	+	A	G	0.0117271	180	3.33001	1.84547e-35
2_12416112	AT2G28910	AT2G28910.1,AT2G28910.2,AT2G28910.3	CXIP4	-	T	C	0.0191443	115	7.09593	1.86476e-35
1_21380187	AT1G57720	AT1G57720.1,AT1G57720.2	AT1G57720	+	A	G	0.0340366	121	7.10255	2.32066e-35
5_10930104	AT5G28900	AT5G28900.1	B''GAMMA	+	A	G	0.249501	125	6.11286	2.47093e-35
2_14177878	AT2G33470	AT2G33470.2,AT2G33470.1	GLTP1	-	T	C	0.0334669	142	4.68126	2.58166e-35
4_16336757	AT4G34110	AT4G34110.1	PAB2	+	A	G	0.0171435	142	4.37448	2.72797e-35
2_19628655	AT2G47960	AT2G47960.1	AT2G47960	+	A	G	0.089372	111	7.10682	3.18647e-35
1_27847227	AT1G74050	AT1G74050.1	RPL6C	-	T	C	0.0515397	159	7.18524	3.26871e-35
3_3321356	AT3G10620	AT3G10620.1	NUDT26	+	A	G	0.205607	110	17.3775	3.31835e-35
1_29746676	AT1G79075	AT1G79075.1,AT1G79075.2	AT1G79075	+	A	G	0.149948	145	18.1826	3.57355e-35
1_17321277	AT1G47260	AT1G47260.1	GAMMACA2	-	T	C	0.0635104	110	7.10438	3.66266e-35
5_3679027	AT5G11500	AT5G11500.1	AT5G11500	+	A	G	0.03172	116	16.7606	3.7613e-35
5_22422987	AT5G55290	AT5G55290.2,AT5G55290.1,AT5G55290.3	VHA-E1	-	T	C	0.100346	116	16.6059	4.00863e-35
4_6409319	AT4G10340	AT4G10340.1	LHCB5	+	A	G	0.101108	146	4.30673	4.01232e-35
3_17650446	AT3G47836	AT3G47836.1,AT3G47836.2	AT3G47836	-	T	C	0.0722756	128	6.14764	4.22155e-35
2_9017595	AT2G20990	AT2G20990.1,AT2G20990.2,AT2G20990.3	SYT1	+	A	G	0.0328996	134	5.22366	4.46196e-35
2_7988856	AT2G18390	AT2G18390.1	ARL2	+	A	G	0.0898966	113	6.14674	4.48927e-35
3_22138250	AT3G59920	AT3G59920.1	GDI2	+	A	G	0.0511566	115	7.07158	5.08207e-35
1_30064319	AT1G79930	AT1G79930.1,AT1G79930.2	HSP70-14	-	T	C	0.0531453	196	4.11639	5.29462e-35
2_490275	AT2G02050	AT2G02050.1	AT2G02050	+	A	G	0.0302963	137	5.18838	5.58986e-35
4_8549633	AT4G14960	AT4G14960.2,AT4G14960.1	TUBA6	-	T	C	0.0127691	207	3.11431	5.7226e-35
5_7214709	AT5G21274	AT5G21274.1	CAM6	-	T	C	0.0663876	111	6.15274	5.99931e-35
1_27540495	AT1G73230	AT1G73230.1	AT1G73230	-	T	C	0.0209945	114	7.07192	6.06983e-35
3_19834824	AT3G53500	AT3G53500.2,AT3G53500.1,AT3G53500.3	RS2Z32	-	T	C	0.0337312	130	5.17878	6.17296e-35
1_27109398	AT1G72020	AT1G72020.1	AT1G72020	-	T	C	0.0252401	113	7.07474	6.7014e-35
5_21792160	AT5G53650	AT5G53650.1	AT5G53650	+	A	G	0.0290512	109	16.6884	7.47349e-35
5_26549909	AT5G66510	AT5G66510.1,AT5G66510.2	GAMMACA3	-	T	C	0.0556128	108	7.09543	7.65462e-35
1_6913528	AT1G19910	AT1G19910.1,AT1G19910.2	VHA-C2	+	A	G	0.00988182	148	4.09148	8.27995e-35
2_18208001	AT2G43970	AT2G43970.1,AT2G43970.2	LARP6B	-	T	C	0.068038	172	3.6217	8.51803e-35
2_3048030	AT2G07360	AT2G07360.1,AT2G07360.2	AT2G07360	-	T	C	0.12256	113	6.1275	8.79443e-35
2_10763121	AT2G25280	AT2G25280.1	AT2G25280	-	T	C	0.102368	147	4.14582	9.176e-35
1_21379835	AT1G57720	AT1G57720.1,AT1G57720.2	AT1G57720	+	A	G	0.112352	694	2.35298	1.07902e-34
4_16171846	AT4G33680	AT4G33680.1	DAP	-	T	C	0.136646	110	7.11598	1.22631e-34
4_16374109	AT4G34200	AT4G34200.1	PGDH1	-	T	C	0.0303722	133	4.87655	1.25271e-34
4_10027730	AT4G18060	AT4G18060.1	AT4G18060	-	T	C	0.183333	110	7.09862	1.33435e-34
2_13412975	AT2G31490	AT2G31490.1	AT2G31490	+	A	G	0.0179283	162	4.73835	1.36939e-34
3_20128554	AT3G54360	AT3G54360.1,AT3G54360.2	AT3G54360	-	T	C	0.181001	141	5.20512	1.40574e-34
3_21635539	AT3G58500	AT3G58500.1	PP2A3	-	T	C	0.0369023	142	4.38159	1.41484e-34
5_19390398	AT5G47890	AT5G47890.1	AT5G47890	+	A	G	0.018257	106	15.4612	1.42621e-34
1_3535874	AT1G10670	AT1G10670.1,AT1G10670.2,AT1G10670.4,AT1G10670.3	ACLA-1	+	A	G	0.0177915	121	6.08077	1.43532e-34
5_9807473	AT5G27700	AT5G27700.1	RPS21C	-	T	C	0.0259439	112	16.5631	1.43532e-34
2_19442066	AT2G47380	AT2G47380.1,AT2G47380.2	AT2G47380	+	A	G	0.127742	99	15.5534	1.53727e-34
1_18357150	AT1G49600	AT1G49600.1,AT1G49600.3,AT1G49600.2	RBP47A	-	T	C	0.0699103	148	6.14927	1.58975e-34
5_3331756	AT5G10540	AT5G10540.1	CYOP	+	A	G	0.0589441	115	15.7315	1.63028e-34
3_18036748	AT3G48680	AT3G48680.1	GAMMACAL2	+	A	G	0.070898	105	6.16467	1.63866e-34
5_24603937	AT5G61150	AT5G61150.1,AT5G61150.2	VIP4	-	T	C	0.270541	135	5.4971	1.70603e-34
1_3538064	AT1G10670	AT1G10670.1,AT1G10670.2,AT1G10670.4,AT1G10670.3	ACLA-1	+	A	G	0.0264338	112	16.5138	1.74437e-34
2_13884822	AT2G32730	AT2G32730.1	RPN2A	+	A	G	0.0803625	133	4.88954	1.86728e-34
5_19092106	AT5G47030	AT5G47030.1	AT5G47030	+	A	G	0.0248613	112	6.11271	2.02495e-34
5_22218730	AT5G54680	AT5G54680.1	ILR3	+	A	G	0.0311466	113	6.10704	2.05983e-34
1_19103076	AT1G51510	AT1G51510.1	Y14	-	T	C	0.0573066	100	15.7487	2.07819e-34
1_18986241	AT1G51200	AT1G51200.1,AT1G51200.2,AT1G51200.4,AT1G51200.3	SAP2	+	A	G	0.0229412	117	5.21864	2.14628e-34
3_1168318	AT3G04400	AT3G04400.1,AT3G04400.2	RPL23C	+	A	G	0.014545	222	4.52472	2.17821e-34
1_23834759	AT1G64230	AT1G64230.1,AT1G64230.2,AT1G64230.5,AT1G64230.3,AT1G64230.4	UBC28	+	A	G	0.0152211	159	4.01329	2.21345e-34
2_18208187	AT2G43970	AT2G43970.1,AT2G43970.2	LARP6B	-	T	C	0.171681	97	7.16207	2.23429e-34
1_18985942	AT1G51200	AT1G51200.1,AT1G51200.2,AT1G51200.4,AT1G51200.3	SAP2	+	A	G	0.0206514	123	5.60581	2.31752e-34
4_17134251	AT4G36210	AT4G36210.3,AT4G36210.1,AT4G36210.2	AT4G36210	+	A	G	0.133562	117	4.70574	2.92586e-34
3_2912467	AT3G09470	AT3G09470.2	AT3G09470	-	T	C	0.120507	171	4.50549	3.16115e-34
2_9072913	AT2G21170	AT2G21170.1,AT2G21170.2,AT2G21170.3	TIM	-	T	C	0.0375607	178	3.73457	3.28635e-34
3_150250	AT3G01390	AT3G01390.1,AT3G01390.2,AT3G01390.3,AT3G01390.4	VHA-G1	-	T	C	0.0272752	101	16.6473	3.31266e-34
1_6223875	AT1G18080	AT1G18080.1	RACK1A	+	A	G	0.015941	134	5.55373	3.62379e-34
3_3508212	AT3G11200	AT3G11200.1,AT3G11200.2	AL2	-	T	C	0.295918	87	15.6641	3.69662e-34
4_16568281	AT4G34720	AT4G34720.1,AT4G34720.2	VHA-C3	-	T	C	0.0178477	135	7.14511	3.75947e-34
1_4150870	AT1G12230	AT1G12230.1,AT1G12230.2	AT1G12230	+	A	G	0.559871	173	2.52718	3.76771e-34
4_12884623	AT4G25100	AT4G25100.2,AT4G25100.5,AT4G25100.3,AT4G25100.1,AT4G25100.4	FSD1	-	T	C	0.254755	3563	2.211	3.86436e-34
5_6679878	AT5G19760	AT5G19760.1	DTC	-	T	C	0.0160284	131	4.66217	3.87244e-34
1_7879274	AT1G22300	AT1G22300.1,AT1G22300.2,AT1G22300.3	GRF10	-	T	C	0.0319473	126	5.51011	4.01695e-34
4_15209359	AT4G31340	AT4G31340.1,AT4G31340.2	AT4G31340	+	A	G	0.0465622	107	7.05579	4.02912e-34
5_16820785	AT5G42080	AT5G42080.1,AT5G42080.4,AT5G42080.3	DRP1A	-	T	C	0.0410831	132	4.64384	4.18022e-34
4_7451295	AT4G12590	AT4G12590.1	AT4G12590	-	T	C	0.0775076	102	7.09609	4.20725e-34
1_1217263	AT1G04480	AT1G04480.1	RPL23C	+	A	G	0.0379861	126	5.15529	4.36015e-34
4_15520254	AT4G32130	AT4G32130.1	AT4G32130	-	T	C	0.11877	112	7.04265	4.3803e-34
2_1121536	AT2G03680	AT2G03680.1,AT2G03680.2,AT2G03680.3	SPR1	+	A	G	0.0104491	131	4.89498	4.67898e-34
3_17454430	AT3G47370	AT3G47370.1,AT3G47370.3,AT3G47370.2	RPS20B	-	T	C	0.0267332	150	4.02535	4.74287e-34
2_4621113	AT2G11520	AT2G11520.1	CRCK3	+	A	G	0.346633	139	3.52735	5.13413e-34
1_3917899	AT1G11650	AT1G11650.2,AT1G11650.1	RBP45B	+	A	G	0.0224144	127	5.14929	5.22575e-34
5_24280894	AT5G60360	AT5G60360.1,AT5G60360.3,AT5G60360.2	ALEU	+	A	G	0.0260054	183	3.34362	5.2963e-34
2_19489155	AT2G47490	AT2G47490.1	NDT1	+	A	G	0.190652	155	4.5567	5.33287e-34
1_7130508	AT1G20580	AT1G20580.1	SMD3B	+	A	G	0.097337	106	17.063	5.5086e-34
1_20899156	AT1G55880	AT1G55880.1,AT1G55880.2	AT1G55880	-	T	C	0.442379	119	4.01356	5.5933e-34
3_10774011	AT3G28710	AT3G28710.1	VHA-D1	-	T	C	0.0497769	145	5.17055	5.84641e-34
3_14093216	AT3G33530	AT3G33530.4,AT3G33530.1,AT3G33530.3,AT3G33530.2	AT3G33530	+	A	G	0.260486	236	4.08587	6.03604e-34
5_24015629	AT5G59613	AT5G59613.2,AT5G59613.1	AT5G59613	-	T	C	0.0117955	117	6.07503	6.40979e-34
5_6764149	AT5G20020	AT5G20020.1	RAN2	+	A	G	0.07044	850	2.32935	6.68125e-34
3_6969501	AT3G20000	AT3G20000.1,AT3G20000.2	TOM40-1	+	A	G	0.0944742	265	2.66958	6.89007e-34
3_18334857	AT3G49430	AT3G49430.1,AT3G49430.7,AT3G49430.6,AT3G49430.4,AT3G49430.2,AT3G49430.3,AT3G49430.5	SR34A	+	A	G	0.144986	107	7.05522	6.94604e-34
5_14135968	AT5G35980	AT5G35980.1,AT5G35980.3	YAK1	+	A	G	0.623639	401	3.21553	7.23662e-34
3_23022620	AT3G62190	AT3G62190.1,AT3G62190.2,AT3G62190.3,AT3G62190.4	AT3G62190	+	A	G	0.290488	113	16.969	7.26665e-34
1_12371099	AT1G34030	AT1G34030.1	RPS18A	-	T	C	0.0264806	203	3.54458	7.29594e-34
3_10055983	AT3G27240	AT3G27240.1	CYC11	-	T	C	0.0395367	99	15.1812	7.48886e-34
3_39252	AT3G01120	AT3G01120.1	CGS1	-	T	C	0.141643	500	2.64668	7.81745e-34
3_8475061	AT3G23600	AT3G23600.1,AT3G23600.2	AT3G23600	+	A	G	0.010064	143	4.28422	8.39464e-34
1_18218192	AT1G49240	AT1G49240.1	ACT8	+	A	G	0.0594118	101	7.08439	8.53644e-34
1_5250891	AT1G15270	AT1G15270.1	AT1G15270	-	T	C	0.0184304	155	5.46588	8.56507e-34
1_2948751	AT1G09150	AT1G09150.1	AT1G09150	+	A	G	0.0707904	103	16.0131	9.08626e-34
5_26467135	AT5G66240	AT5G66240.2,AT5G66240.1,AT5G66240.3	AT5G66240	+	A	G	0.175665	231	3.07607	9.3916e-34
4_251087	AT4G00585	AT4G00585.1	AT4G00585	-	T	C	0.0674157	102	7.07034	9.50703e-34
5_693281	AT5G02960	AT5G02960.1	RPS23B	-	T	C	0.0214263	134	6.08677	1.20334e-33
3_2389447	AT3G07480	AT3G07480.1	AT3G07480	+	A	G	0.0279151	175	4.74975	1.2378e-33
3_3673957	AT3G11630	AT3G11630.1	BAS1	+	A	G	0.0745429	106	6.11278	1.2543e-33
3_4063470	AT3G12800	AT3G12800.1	SDRB	-	T	C	0.0748344	113	6.99668	1.28462e-33
3_23432588	AT3G63460	AT3G63460.1,AT3G63460.2,AT3G63460.3	SEC31B	-	T	C	0.0762477	165	5.13921	1.37205e-33
2_14980421	AT2G35630	AT2G35630.1,AT2G35630.2	MOR1	+	A	G	0.311111	98	7.12786	1.37461e-33
3_3735201	AT3G11830	AT3G11830.1,AT3G11830.2	CCT7	+	A	G	0.0430812	184	3.27406	1.43288e-33
2_16184719	AT2G38710	AT2G38710.1,AT2G38710.3,AT2G38710.2,AT2G38710.4	AT2G38710	-	T	C	0.0466549	106	7.0263	1.46032e-33
1_19128468	AT1G51590	AT1G51590.1,AT1G51590.2	MNS1	-	T	C	0.596975	671	2.37835	1.52164e-33
3_3022639	AT3G09840	AT3G09840.1	CDC48A	+	A	G	0.0217865	180	3.91829	1.58775e-33
2_19003657	AT2G46280	AT2G46280.1,AT2G46280.2,AT2G46280.3	TIF3I1	-	T	C	0.0452128	102	17.3686	1.80408e-33
1_24486702	AT1G65820	AT1G65820.1,AT1G65820.3,AT1G65820.2	AT1G65820	+	A	G	0.0291701	142	3.93892	1.89147e-33
2_490108	AT2G02050	AT2G02050.1	AT2G02050	+	A	G	0.0267566	123	5.48706	1.90127e-33
3_20545701	AT3G55410	AT3G55410.1,AT3G55410.2	AT3G55410	+	A	G	0.0613333	115	6.97531	1.92538e-33
5_693276	AT5G02960	AT5G02960.1	RPS23B	-	T	C	0.0282149	156	5.15041	2.03846e-33
1_13452870	AT1G36050	AT1G36050.2,AT1G36050.1	AT1G36050	+	A	G	0.454849	408	3.07076	2.07581e-33
3_23053221	AT3G62290	AT3G62290.1,AT3G62290.2,AT3G62290.3	ARFA1E	+	A	G	0.00542304	133	4.46778	2.29391e-33
3_3735533	AT3G11830	AT3G11830.1,AT3G11830.2	CCT7	+	A	G	0.0818994	376	2.98447	2.43847e-33
1_12208380	AT1G33680	AT1G33680.1	AT1G33680	+	A	G	0.165425	111	6.05936	2.53651e-33
3_602660	AT3G02780	AT3G02780.1,AT3G02780.2	IPP2	-	T	C	0.248763	1257	3.153	2.54647e-33
1_18217633	AT1G49240	AT1G49240.1	ACT8	+	A	G	0.0963539	1065	1.99189	2.59933e-33
4_14563137	AT4G29735	AT4G29735.1,AT4G29735.2	AT4G29735	-	T	C	0.0341518	121	6.00511	2.65929e-33
1_24249040	AT1G65290	AT1G65290.1	MTACP2	-	T	C	0.0205502	124	17.5441	2.66024e-33
2_9072487	AT2G21170	AT2G21170.1,AT2G21170.3	TIM	-	T	C	0.0445831	200	2.69456	2.80218e-33
1_12370146	AT1G34030	AT1G34030.1	RPS18A	-	T	C	0.0856698	110	16.2862	2.81599e-33
5_862664	AT5G03455	AT5G03455.1,AT5G03455.2	CDC25	+	A	G	0.106557	169	4.86426	2.88277e-33
5_6938741	AT5G20500	AT5G20500.1	GRXC4	+	A	G	0.0189615	107	17.4894	2.91556e-33
1_2574709	AT1G08200	AT1G08200.1	AXS2	-	T	C	0.0142677	136	2.5534	3.07856e-33
4_8424877	AT4G14710	AT4G14710.2,AT4G14710.1,AT4G14710.4,AT4G14710.3,AT4G14710.5	ARD3	-	T	C	0.0377795	98	16.5534	3.1058e-33
1_8560655	AT1G24180	AT1G24180.1	IAR4	-	T	C	0.059976	150	4.81812	3.29287e-33
3_3909271	AT3G12260	AT3G12260.1	AT3G12260	-	T	C	0.0339853	106	7.02802	3.29287e-33
5_26080761	AT5G65260	AT5G65260.1	PABN2	-	T	C	0.106195	144	4.43523	3.30802e-33
2_16323169	AT2G39130	AT2G39130.1	AT2G39130	-	T	C	0.248082	97	7.09574	3.31326e-33
3_23227964	AT3G62810	AT3G62810.1,AT3G62810.2	AT3G62810	+	A	G	0.0224469	131	4.99787	3.5789e-33
3_22471967	AT3G60820	AT3G60820.1,AT3G60820.2	PBF1	-	T	C	0.0498647	129	5.9935	3.6028e-33
5_19390378	AT5G47890	AT5G47890.1	AT5G47890	+	A	G	0.0152845	101	16.1825	3.90927e-33
5_19789309	AT5G48810	AT5G48810.1	CYTB5-D	-	T	C	0.0242887	140	6.1083	4.33818e-33
5_4889672	AT5G15090	AT5G15090.1,AT5G15090.2	VDAC3	-	T	C	0.0258621	123	5.12192	4.47439e-33
1_2408450	AT1G07770	AT1G07770.3,AT1G07770.2,AT1G07770.1	RPS15AA	-	T	C	0.0121475	112	6.03825	4.68166e-33
2_19530873	AT2G47610	AT2G47610.1	RPL7AA	+	A	G	0.0258896	227	3.36045	4.77574e-33
4_11022821	AT4G20440	AT4G20440.4,AT4G20440.3,AT4G20440.1	SMB	-	T	C	0.112689	119	4.84179	5.10581e-33
5_4398749	AT5G13650	AT5G13650.2,AT5G13650.1	AT5G13650	+	A	G	0.148678	135	3.65021	5.27995e-33
5_3791336	AT5G11770	AT5G11770.1	AT5G11770	-	T	C	0.0140778	147	4.58124	5.3975e-33
4_16337237	AT4G34110	AT4G34110.1	PAB2	+	A	G	0.0413331	444	1.9942	5.45409e-33
4_292483	AT4G00710	AT4G00710.1,AT4G00710.2	BSK3	+	A	G	0.138189	203	2.80173	5.88916e-33
4_16774500	AT4G35260	AT4G35260.1	IDH1	-	T	C	0.0292634	116	6.00528	6.21406e-33
3_5291063	AT3G15610	AT3G15610.1	AT3G15610	-	T	C	0.22043	123	7.10871	6.54958e-33
5_19137600	AT5G47120	AT5G47120.1	BI-1	+	A	G	0.0212942	103	16.2385	6.65534e-33
3_19660699	AT3G53020	AT3G53020.1	RPL24B	-	T	C	0.0308943	152	4.16209	6.79329e-33
3_4396847	AT3G13490	AT3G13490.1	OVA5	-	T	C	0.235977	122	4.584	7.75373e-33
3_19036635	AT3G51270	AT3G51270.1,AT3G51270.3,AT3G51270.4,AT3G51270.2	AT3G51270	+	A	G	0.104771	112	6.01985	8.08817e-33
1_1628997	AT1G05500	AT1G05500.1,AT1G05500.2	SYT5	+	A	G	0.133166	106	6.05338	8.1885e-33
3_10968369	AT3G28940	AT3G28940.1	AT3G28940	-	T	C	0.0312024	123	5.49251	8.33046e-33
2_8502031	AT2G19680	AT2G19680.2,AT2G19680.1	AT2G19680	+	A	G	0.173476	518	2.42355	8.35312e-33
5_7937203	AT5G23535	AT5G23535.1,AT5G23535.2	AT5G23535	+	A	G	0.142344	119	4.82293	8.46358e-33
2_9237258	AT2G21580	AT2G21580.1,AT2G21580.2	RPS25B	+	A	G	0.00989492	113	6.02356	8.56101e-33
3_368589	AT3G02090	AT3G02090.1,AT3G02090.2	MPPBETA	+	A	G	0.0250052	120	6.03191	8.56101e-33
3_21129897	AT3G57090	AT3G57090.1,AT3G57090.2	FIS1A	+	A	G	0.0612883	98	16.3903	8.78219e-33
3_21352695	AT3G57650	AT3G57650.1	LPAT2	+	A	G	0.124686	149	3.65561	9.11902e-33
3_21353061	AT3G57650	AT3G57650.1	LPAT2	+	A	G	0.282686	80	15.6113	9.70075e-33
2_16475984	AT2G39460	AT2G39460.1,AT2G39460.2	RPL23AA	+	A	G	0.146043	537	3.66772	1.01849e-32
3_20942870	AT3G56490	AT3G56490.1	HIT3	+	A	G	0.0386266	180	4.09129	1.08275e-32
5_3791153	AT5G11770	AT5G11770.1	AT5G11770	-	T	C	0.0129047	114	6.93505	1.10094e-32
5_26080316	AT5G65260	AT5G65260.1	PABN2	-	T	C	0.491124	83	7.20898	1.14214e-32
1_5402215	AT1G15690	AT1G15690.1,AT1G15690.2	AVP1	+	A	G	0.0274314	132	7.14986	1.15169e-32
1_1189489	AT1G04410	AT1G04410.1	MDH1	-	T	C	0.0325858	696	3.64605	1.172e-32
3_23052990	AT3G62290	AT3G62290.1,AT3G62290.2,AT3G62290.3	ARFA1E	+	A	G	0.00706444	148	4.06276	1.19939e-32
3_23227904	AT3G62810	AT3G62810.1,AT3G62810.2	AT3G62810	+	A	G	0.0834049	583	2.30843	1.21967e-32
5_5245005	AT5G16050	AT5G16050.1,AT5G16050.2	GRF5	-	T	C	0.0430622	126	4.27114	1.26485e-32
5_21548640	AT5G53140	AT5G53140.1,AT5G53140.2	AT5G53140	+	A	G	0.139475	218	2.37675	1.27326e-32
5_2870401	AT5G09225	AT5G09225.1	AT5G09225	-	T	C	0.127717	94	5.24838	1.31034e-32
3_1361376	AT3G04920	AT3G04920.1,AT3G04920.2	RPS24A	+	A	G	0.00888784	113	6.98126	1.31568e-32
2_17186979	AT2G41220	AT2G41220.1	GLU2	+	A	G	0.0346992	188	3.54258	1.47729e-32
4_15132180	AT4G31120	AT4G31120.1,AT4G31120.2	PMRT15	-	T	C	0.8	296	3.70925	1.50907e-32
1_22359032	AT1G60730	AT1G60730.1,AT1G60730.2,AT1G60730.3	AT1G60730	-	T	C	0.039445	145	5.42617	1.52511e-32
2_133951	AT2G01250	AT2G01250.1,AT2G01250.2	RPL7B	-	T	C	0.00515421	123	5.10959	1.5934e-32
2_14531392	AT2G34470	AT2G34470.1,AT2G34470.2	UREG	-	T	C	0.072309	176	6.0844	1.66899e-32
4_6174644	AT4G09800	AT4G09800.1	RPS18A	+	A	G	0.0208267	195	4.62702	1.66979e-32
3_368327	AT3G02090	AT3G02090.1,AT3G02090.2	MPPBETA	+	A	G	0.0146876	118	5.51837	1.68195e-32
1_4150896	AT1G12230	AT1G12230.1,AT1G12230.2	AT1G12230	+	A	G	0.463303	101	16.7037	1.76882e-32
5_9458966	AT5G26880	AT5G26880.1	AGL26	-	T	C	0.0984633	173	3.43302	1.89106e-32
3_9423298	AT3G25800	AT3G25800.1,AT3G25800.3,AT3G25800.2	PP2AA2	-	T	C	0.0894855	120	4.80631	1.98145e-32
3_19139905	AT3G51610	AT3G51610.1	AT3G51610	-	T	C	0.120948	97	6.09007	2.05026e-32
1_7926581	AT1G22450	AT1G22450.1	COX6B-1	+	A	G	0.018273	113	5.99303	2.07192e-32
1_2942768	AT1G09140	AT1G09140.1,AT1G09140.2,AT1G09140.3	SR30	-	T	C	0.181435	86	16.1945	2.38829e-32
5_25750093	AT5G64400	AT5G64400.1,AT5G64400.2,AT5G64400.3	AT5G64400	+	A	G	0.00891016	108	6.94278	2.40144e-32
5_722645	AT5G03080	AT5G03080.1	LPPG	+	A	G	0.0660819	113	6.91276	2.58923e-32
3_3645512	AT3G11560	AT3G11560.2,AT3G11560.3,AT3G11560.4	AT3G11560	+	A	G	0.171735	96	6.09351	2.61025e-32
3_16571172	AT3G45240	AT3G45240.2,AT3G45240.1,AT3G45240.3	GRIK1	-	T	C	0.208394	144	3.7926	2.62365e-32
5_8954914	AT5G25754	AT5G25754.1	AT5G25754	+	A	G	0.185136	279	2.56585	2.79909e-32
2_19552012	AT2G47690	AT2G47690.1,AT2G47690.2,AT2G47690.3	AT2G47690	+	A	G	0.0180361	108	16.4126	2.83578e-32
4_1042971	AT4G02370	AT4G02370.1	AT4G02370	+	A	G	0.121731	135	4.433	2.9212e-32
3_10122685	AT3G27340	AT3G27340.1,AT3G27340.3,AT3G27340.4,AT3G27340.2	AT3G27340	+	A	G	0.159052	94	15.8936	2.93445e-32
3_22252337	AT3G60210	AT3G60210.1	AT3G60210	-	T	C	0.0709752	123	4.57534	3.0005e-32
1_23834960	AT1G64230	AT1G64230.1,AT1G64230.2,AT1G64230.5,AT1G64230.3,AT1G64230.4	UBC28	+	A	G	0.0101358	100	17.0656	3.46902e-32
3_20846303	AT3G56190	AT3G56190.1,AT3G56190.2	ASNAP2	-	T	C	0.097619	246	2.16967	3.48697e-32
4_6733228	AT4G11010	AT4G11010.1	NDPK3	-	T	C	0.0122865	123	4.81128	3.56961e-32
1_2637494	AT1G08360	AT1G08360.1	RPL10AA	+	A	G	0.0245595	184	17.7602	3.59635e-32
3_2586184	AT3G08520	AT3G08520.1	RPL41E	+	A	G	0.0152868	113	5.98242	3.98785e-32
3_9269944	AT3G25520	AT3G25520.1,AT3G25520.3,AT3G25520.2	ATL5	-	T	C	0.0145428	181	3.51558	4.19371e-32
3_23415960	AT3G63410	AT3G63410.1	VTE3	-	T	C	0.0797401	135	4.36805	4.38199e-32
1_13543798	AT1G36160	AT1G36160.2,AT1G36160.1	ACC1	+	A	G	0.201274	158	4.16641	4.49275e-32
4_16370093	AT4G34180	AT4G34180.1	AT4G34180	-	T	C	0.0301192	139	4.61537	4.55122e-32
2_15858738	AT2G37860	AT2G37860.3,AT2G37860.4,AT2G37860.1,AT2G37860.2	LCD1	+	A	G	0.212454	116	4.78238	4.61631e-32
4_18114973	AT4G38800	AT4G38800.1	MTN1	-	T	C	0.0259265	156	4.24989	4.65561e-32
3_807640	AT3G03380	AT3G03380.1,AT3G03380.2	DEGP7	+	A	G	0.100705	100	5.52626	5.04155e-32
5_19406372	AT5G47930	AT5G47930.1	RPS27D	-	T	C	0.0189521	102	16.0581	5.08447e-32
1_4947410	AT1G14450	AT1G14450.1,AT1G14450.2	AT1G14450	-	T	C	0.0155767	126	4.25108	5.13834e-32
5_21760168	AT5G53560	AT5G53560.1	CYTB5-E	+	A	G	0.0443545	493	3.05163	5.15817e-32
4_15057630	AT4G30950	AT4G30950.1	FAD6	-	T	C	0.104569	119	5.11486	5.22972e-32
5_3285939	AT5G10450	AT5G10450.1,AT5G10450.2,AT5G10450.3,AT5G10450.4	GRF6	-	T	C	0.0103315	120	4.29821	5.32623e-32
3_22287227	AT3G60300	AT3G60300.1,AT3G60300.2	AT3G60300	+	A	G	0.0771889	134	4.4116	5.39819e-32
1_28229860	AT1G75220	AT1G75220.1	AT1G75220	-	T	C	0.115269	191	3.95674	5.89317e-32
3_20556188	AT3G55440	AT3G55440.1	CTIMC	+	A	G	0.0141658	108	17.0532	5.9189e-32
1_24541474	AT1G65930	AT1G65930.1	CICDH	+	A	G	0.00834879	126	4.29669	5.9395e-32
4_16338898	AT4G34110	AT4G34110.1	PAB2	+	A	G	0.114977	988	2.40325	5.99635e-32
3_20699359	AT3G55750	AT3G55750.1	RPL35AD	+	A	G	0.0285925	310	2.97779	6.84403e-32
3_23223354	AT3G62790	AT3G62790.1	AT3G62790	-	T	C	0.0304504	119	6.93939	7.05691e-32
3_19506684	AT3G52590	AT3G52590.1	RPL40B	+	A	G	0.186776	1966	2.76289	7.13449e-32
5_24632010	AT5G61240	AT5G61240.1,AT5G61240.2	AT5G61240	+	A	G	0.140751	105	6.01161	7.14424e-32
1_5472369	AT1G15930	AT1G15930.2,AT1G15930.1	RPS12A	+	A	G	0.0123474	179	3.08111	7.15625e-32
3_16164481	AT3G44590	AT3G44590.1,AT3G44590.2	RPP2D	+	A	G	0.0350252	167	3.35288	7.31524e-32
1_4050650	AT1G12000	AT1G12000.1	PFP-BETA1	-	T	C	0.144689	880	2.0768	7.33451e-32
1_6609201	AT1G19120	AT1G19120.1	LSM1A	+	A	G	0.258333	93	17.3152	7.34126e-32
1_25262967	AT1G67430	AT1G67430.1,AT1G67430.2	RPL17B	+	A	G	0.00753504	136	4.21799	7.85575e-32
4_13468720	AT4G26710	AT4G26710.1,AT4G26710.2	VHA-E2	+	A	G	0.0263158	110	5.97214	8.10198e-32
3_4433972	AT3G13580	AT3G13580.1,AT3G13580.2,AT3G13580.9,AT3G13580.3,AT3G13580.7,AT3G13580.8,AT3G13580.6,AT3G13580.5,AT3G13580.4	RPL7D	+	A	G	0.028169	122	5.39314	8.46439e-32
1_18986187	AT1G51200	AT1G51200.1,AT1G51200.2,AT1G51200.4,AT1G51200.3	SAP2	+	A	G	0.028621	132	3.87841	8.87015e-32
4_18258369	AT4G39200	AT4G39200.1,AT4G39200.2	RPS25E	+	A	G	0.0073915	148	4.21795	9.14457e-32
2_18460083	AT2G44770	AT2G44770.1	AT2G44770	+	A	G	0.322581	120	4.03675	9.38282e-32
5_13108743	AT5G34850	AT5G34850.1	PAP26	-	T	C	0.016389	120	5.05365	9.55315e-32
3_1009725	AT3G03920	AT3G03920.1	AT3G03920	-	T	C	0.0261628	333	2.68169	1.00031e-31
1_22355002	AT1G60710	AT1G60710.1	ATB2	-	T	C	0.0621118	150	5.06498	1.00948e-31
3_4515793	AT3G13750	AT3G13750.1	BGAL1	+	A	G	0.114638	195	3.02974	1.01399e-31
5_1028504	AT5G03850	AT5G03850.1	RPS28A	-	T	C	0.262735	1960	2.7305	1.02e-31
3_4316363	AT3G13320	AT3G13320.1	CAX2	+	A	G	0.146169	145	3.68822	1.07348e-31
1_4030382	AT1G11930	AT1G11930.2,AT1G11930.1	AT1G11930	+	A	G	0.6625	159	2.28351	1.08038e-31
1_20256369	AT1G54250	AT1G54250.1	NRPB8A	+	A	G	0.317003	110	5.4421	1.14224e-31
4_5231957	AT4G08280	AT4G08280.1,AT4G08280.2,AT4G08280.3	AT4G08280	+	A	G	0.250696	90	16.7517	1.15498e-31
2_7947003	AT2G18280	AT2G18280.1,AT2G18280.2	TULP2	+	A	G	0.0802764	151	3.14189	1.15615e-31
5_21321885	AT5G52540	AT5G52540.1	AT5G52540	-	T	C	0.0768772	129	3.95516	1.18243e-31
1_24485757	AT1G65820	AT1G65820.1,AT1G65820.3,AT1G65820.2	AT1G65820	+	A	G	0.0147275	200	3.94176	1.18365e-31
4_13470301	AT4G26720	AT4G26720.1	PPX1	-	T	C	0.251208	104	5.45071	1.20967e-31
3_8088560	AT3G22845	AT3G22845.1,AT3G22845.2	AT3G22845	+	A	G	0.0660086	107	15.8943	1.27753e-31
1_20968543	AT1G56070	AT1G56070.1,AT1G56070.2,AT1G56070.3	LOS1	-	T	C	0.0116197	180	3.05891	1.3942e-31
5_5839682	AT5G17710	AT5G17710.2,AT5G17710.3,AT5G17710.1	EMB1241	-	T	C	0.325466	262	2.4225	1.39655e-31
5_1323731	AT5G04600	AT5G04600.1	AT5G04600	+	A	G	0.0657093	151	4.15799	1.41407e-31
1_29207884	AT1G77710	AT1G77710.1	AT1G77710	+	A	G	0.0267883	91	16.0723	1.54477e-31
2_7557443	AT2G17390	AT2G17390.1	AKR2B	+	A	G	0.0396825	210	3.69451	1.5698e-31
3_5301529	AT3G15640	AT3G15640.1,AT3G15640.2	COX5B-1	+	A	G	0.0458052	95	15.3863	1.58801e-31
5_17160714	AT5G42790	AT5G42790.1	PAF1	-	T	C	0.0329008	142	4.0261	1.59114e-31
5_22350513	AT5G55070	AT5G55070.1	AT5G55070	+	A	G	0.0609074	98	15.7679	1.62301e-31
2_17461354	AT2G41840	AT2G41840.1	RPS2C	-	T	C	0.0192209	150	3.66061	1.67373e-31
1_16268087	AT1G43170	AT1G43170.8,AT1G43170.2,AT1G43170.1,AT1G43170.3,AT1G43170.7,AT1G43170.9,AT1G43170.4,AT1G43170.5,AT1G43170.6	ARP1	+	A	G	0.0130114	166	3.1212	1.70023e-31
5_19092072	AT5G47030	AT5G47030.1	AT5G47030	+	A	G	0.0299546	99	6.93608	1.84451e-31
4_15389618	AT4G31810	AT4G31810.1	AT4G31810	-	T	C	0.136213	123	4.07457	1.93306e-31
4_16339569	AT4G34110	AT4G34110.1	PAB2	+	A	G	0.559738	6334	1.95269	2.01122e-31
1_11411554	AT1G31812	AT1G31812.1	ACBP6	-	T	C	0.0127838	232	3.34926	2.07067e-31
4_15058024	AT4G30950	AT4G30950.1	FAD6	-	T	C	0.100822	135	3.64934	2.15187e-31
5_2819245	AT5G08670	AT5G08670.1	AT5G08670	-	T	C	0.0131642	138	3.65595	2.18104e-31
1_24559690	AT1G65980	AT1G65980.1	PRXIIB	-	T	C	0.00866988	117	4.79225	2.27712e-31
4_6409068	AT4G10340	AT4G10340.1	LHCB5	+	A	G	0.142146	314	2.62574	2.44122e-31
3_19543736	AT3G52730	AT3G52730.1,AT3G52730.2	AT3G52730	-	T	C	0.0335517	297	3.79602	2.46991e-31
3_21034971	AT3G56800	AT3G56800.1	CAM2	-	T	C	0.0263772	113	4.79673	2.56883e-31
5_3556200	AT5G11170	AT5G11170.1,AT5G11170.2	RH15	+	A	G	0.0427544	113	5.40924	2.74466e-31
4_8845111	AT4G15470	AT4G15470.1	AT4G15470	+	A	G	0.036205	166	3.1838	2.82206e-31
2_8694773	AT2G20140	AT2G20140.1	RPT2B	+	A	G	0.12751	127	4.70966	2.89649e-31
5_21760277	AT5G53560	AT5G53560.1	CYTB5-E	+	A	G	0.0129032	124	5.0984	2.94666e-31
3_10154987	AT3G27430	AT3G27430.2,AT3G27430.3,AT3G27430.1	PBB1	+	A	G	0.0167796	104	15.8234	2.97727e-31
3_2917664	AT3G09500	AT3G09500.1	RPL35A	+	A	G	0.00648448	126	4.81287	3.17395e-31
1_608097	AT1G02780	AT1G02780.1	RPL19A	-	T	C	0.00853411	147	3.73451	3.24482e-31
3_18167057	AT3G49010	AT3G49010.2,AT3G49010.3,AT3G49010.4,AT3G49010.7,AT3G49010.6,AT3G49010.1,AT3G49010.5	RPL13B	-	T	C	0.0125802	153	3.4835	3.27267e-31
5_815517	AT5G03345	AT5G03345.1,AT5G03345.2	AT5G03345	+	A	G	0.14966	88	16.3966	3.48521e-31
1_9527888	AT1G27435	AT1G27435.1	AT1G27435	-	T	C	0.377478	952	2.9564	3.5013e-31
2_490247	AT2G02050	AT2G02050.1	AT2G02050	+	A	G	0.0281876	128	6.98783	3.55049e-31
5_19789378	AT5G48810	AT5G48810.1	CYTB5-D	-	T	C	0.0129164	95	17.3731	3.56741e-31
2_14806568	AT2G35120	AT2G35120.1	GDH2	-	T	C	0.0337825	361	3.47927	3.65456e-31
3_4362136	AT3G13410	AT3G13410.1	AT3G13410	-	T	C	0.0220974	118	17.6562	3.74927e-31
3_213211	AT3G01540	AT3G01540.4,AT3G01540.3,AT3G01540.2	RH14	-	T	C	0.0386505	118	4.75828	3.93083e-31
2_11885178	AT2G27900	AT2G27900.1,AT2G27900.2	AT2G27900	+	A	G	0.203125	104	5.43068	3.96544e-31
3_2605915	AT3G08580	AT3G08580.2,AT3G08580.1	AAC1	-	T	C	0.00475458	133	4.11033	4.01242e-31
1_2408451	AT1G07770	AT1G07770.3,AT1G07770.2,AT1G07770.1	RPS15AA	-	T	C	0.0131004	126	4.76141	4.31533e-31
1_27847257	AT1G74050	AT1G74050.1	RPL6C	-	T	C	0.0516586	204	4.09641	4.56189e-31
1_30228108	AT1G80410	AT1G80410.1,AT1G80410.2	EMB2753	-	T	C	0.070303	116	16.5458	4.66591e-31
4_11218601	AT4G20980	AT4G20980.1,AT4G20980.4,AT4G20980.2,AT4G20980.3	TIF3D1	+	A	G	0.0816847	128	4.31619	4.75163e-31
2_15170286	AT2G36160	AT2G36160.1	RPS14A	+	A	G	0.01365	123	4.68193	4.93986e-31
4_251089	AT4G00585	AT4G00585.1	AT4G00585	-	T	C	0.715426	1076	2.74611	5.10362e-31
1_23835277	AT1G64230	AT1G64230.1,AT1G64230.2,AT1G64230.5,AT1G64230.3,AT1G64230.4	UBC28	+	A	G	0.0314623	88	16.8951	5.24165e-31
4_9381323	AT4G16660	AT4G16660.1,AT4G16660.2	HSP70-17	+	A	G	0.13565	121	5.33954	5.24411e-31
5_2824666	AT5G08680	AT5G08680.1	AT5G08680	+	A	G	0.0169115	99	17.3276	5.52588e-31
3_5301350	AT3G15640	AT3G15640.1,AT3G15640.2	COX5B-1	+	A	G	0.0241224	134	5.41823	5.98809e-31
4_16039125	AT4G33250	AT4G33250.1	TIF3K1	-	T	C	0.0360942	95	6.95276	5.98809e-31
1_5206311	AT1G15130	AT1G15130.1	AT1G15130	-	T	C	0.0792891	116	4.74429	6.43492e-31
5_26466587	AT5G66240	AT5G66240.2,AT5G66240.1,AT5G66240.3	AT5G66240	+	A	G	0.0683292	137	5.00955	6.75422e-31
2_18206618	AT2G43970	AT2G43970.1,AT2G43970.2	LARP6B	-	T	C	0.0228845	129	4.33304	6.97955e-31
5_19241775	AT5G47435	AT5G47435.1,AT5G47435.2	PURU1	+	A	G	0.102163	137	4.30493	6.97955e-31
1_18985861	AT1G51200	AT1G51200.1,AT1G51200.2,AT1G51200.4,AT1G51200.3	SAP2	+	A	G	0.0470194	295	2.37827	7.56355e-31
3_8088450	AT3G22845	AT3G22845.1,AT3G22845.2	AT3G22845	+	A	G	0.0345662	100	5.96595	7.72283e-31
1_23790817	AT1G64090	AT1G64090.1,AT1G64090.2	RTNLB3	+	A	G	0.373451	211	2.71191	7.83358e-31
5_2780189	AT5G08570	AT5G08570.2,AT5G08570.3,AT5G08570.1	AT5G08570	+	A	G	0.0548266	117	5.35913	8.11875e-31
1_12011575	AT1G33120	AT1G33120.1	RPL9B	+	A	G	0.0151139	128	6.01213	8.23626e-31
1_7130425	AT1G20580	AT1G20580.1	SMD3B	+	A	G	0.0474419	102	15.3708	8.45996e-31
3_2917835	AT3G09500	AT3G09500.1	RPL35A	+	A	G	0.0752775	841	3.43115	8.58432e-31
2_8788994	AT2G20360	AT2G20360.1	AT2G20360	+	A	G	0.0833793	453	3.03232	8.73368e-31
1_28698406	AT1G76490	AT1G76490.1	HMG1	+	A	G	0.0276472	100	6.89709	9.02603e-31
1_25263618	AT1G67430	AT1G67430.1,AT1G67430.2	RPL17B	+	A	G	0.0166359	135	3.92055	9.27814e-31
5_1418006	AT5G04870	AT5G04870.1	CPK1	-	T	C	0.103908	117	4.34263	9.4483e-31
2_19651618	AT2G48060	AT2G48060.2,AT2G48060.3,AT2G48060.1	AT2G48060	-	T	C	0.142429	95	5.99727	9.52375e-31
2_7478138	AT2G17190	AT2G17190.1	DSK2A	-	T	C	0.0815987	98	6.90301	9.73726e-31
1_10832038	AT1G30580	AT1G30580.1	AT1G30580	-	T	C	0.0165618	100	16.2368	9.80785e-31
1_19104077	AT1G51510	AT1G51510.1	Y14	-	T	C	0.461017	1360	2.50423	1.00082e-30
4_2817567	AT4G05530	AT4G05530.1	SDRA	+	A	G	0.0843608	130	3.90254	1.02536e-30
5_7599484	AT5G22790	AT5G22790.1	RER1	-	T	C	0.214156	118	4.6948	1.05415e-30
4_18148857	AT4G38920	AT4G38920.1,AT4G38920.2	VHA-C3	+	A	G	0.0109854	101	6.89064	1.06852e-30
2_11049828	AT2G25910	AT2G25910.1,AT2G25910.2	AT2G25910	-	T	C	0.0301624	117	5.00193	1.08679e-30
3_21638862	AT3G58500	AT3G58500.1	PP2A3	-	T	C	0.0295841	106	5.4163	1.0978e-30
3_19885706	AT3G53630	AT3G53630.1,AT3G53630.2	AT3G53630	+	A	G	0.144286	101	5.95397	1.10644e-30
2_9017524	AT2G20990	AT2G20990.1,AT2G20990.2,AT2G20990.3	SYT1	+	A	G	0.0178919	92	16.0116	1.15991e-30
2_11818593	AT2G27720	AT2G27720.1,AT2G27720.4	RPP2A	+	A	G	0.0146222	113	5.03172	1.16324e-30
2_18205823	AT2G43970	AT2G43970.1,AT2G43970.2	LARP6B	-	T	C	0.0185573	124	6.91656	1.17914e-30
3_22402400	AT3G60600	AT3G60600.1,AT3G60600.2,AT3G60600.3	PVA11	+	A	G	0.0235871	101	6.90228	1.27502e-30
4_14181838	AT4G28710	AT4G28710.1	XI-H	+	A	G	0.29912	102	5.93085	1.30315e-30
3_10122649	AT3G27340	AT3G27340.1,AT3G27340.3,AT3G27340.4,AT3G27340.2	AT3G27340	+	A	G	0.0937819	92	16.481	1.34578e-30
3_10780390	AT3G28715	AT3G28715.1,AT3G28715.2	VHA-D2	+	A	G	0.0522727	92	16.1617	1.36994e-30
2_14805725	AT2G35120	AT2G35120.1	GDH2	-	T	C	0.0562319	97	15.6292	1.37197e-30
2_8965050	AT2G20820	AT2G20820.1,AT2G20820.2	AT2G20820	+	A	G	0.0709466	736	2.56273	1.45106e-30
2_8789072	AT2G20360	AT2G20360.1	AT2G20360	+	A	G	0.0234558	90	16.4699	1.48604e-30
2_7548013	AT2G17360	AT2G17360.1	RPS4A	+	A	G	0.016256	126	4.49203	1.48995e-30
1_1163346	AT1G04340	AT1G04340.1	AT1G04340	-	T	C	0.101598	89	6.9591	1.49183e-30
5_22425064	AT5G55300	AT5G55300.1,AT5G55300.3,AT5G55300.2	TOP1	-	T	C	0.167683	110	5.88523	1.57393e-30
5_588566	AT5G02610	AT5G02610.1,AT5G02610.2	RPL35D	+	A	G	0.04375	105	6.90341	1.58851e-30
2_8512412	AT2G19730	AT2G19730.1,AT2G19730.2,AT2G19730.3	RPL28A	+	A	G	0.0251323	380	2.26404	1.59449e-30
5_2818396	AT5G08670	AT5G08670.1	AT5G08670	-	T	C	0.0137964	87	17.5297	1.64553e-30
3_5052030	AT3G15000	AT3G15000.1	MORF8	+	A	G	0.0317501	125	6.89288	1.67928e-30
2_9071418	AT2G21170	AT2G21170.1,AT2G21170.2,AT2G21170.3	TIM	-	T	C	0.0286861	143	5.43209	1.71672e-30
5_21760169	AT5G53560	AT5G53560.1	CYTB5-E	+	A	G	0.00876252	98	6.88376	1.73785e-30
2_17460819	AT2G41840	AT2G41840.1	RPS2C	-	T	C	0.019125	327	2.52127	1.78194e-30
3_19504321	AT3G52580	AT3G52580.1	RPS14C	+	A	G	0.0617593	370	2.43886	1.89949e-30
4_1136959	AT4G02580	AT4G02580.1	AT4G02580	+	A	G	0.0472765	138	17.4342	1.94916e-30
1_9969536	AT1G28395	AT1G28395.1,AT1G28395.3,AT1G28395.6,AT1G28395.5,AT1G28395.4,AT1G28395.2	AT1G28395	-	T	C	0.277078	110	4.49035	2.08539e-30
3_1331183	AT3G04840	AT3G04840.1	RPS3AA	+	A	G	0.0757587	1036	2.97984	2.08821e-30
1_12049725	AT1G33230	AT1G33230.1,AT1G33230.2	AT1G33230	+	A	G	0.0812453	107	5.97694	2.19465e-30
1_9527911	AT1G27435	AT1G27435.1	AT1G27435	-	T	C	0.0353303	92	16.4318	2.23286e-30
5_4530818	AT5G14040	AT5G14040.1	MPT3	-	T	C	0.0419108	93	15.8153	2.235e-30
1_28594580	AT1G76200	AT1G76200.1	AT1G76200	+	A	G	0.017351	131	6.98849	2.23647e-30
3_19651167	AT3G52990	AT3G52990.1,AT3G52990.2	AT3G52990	+	A	G	0.054387	181	3.20398	2.2935e-30
4_15186922	AT4G31290	AT4G31290.1	AT4G31290	+	A	G	0.0561316	157	2.99797	2.31643e-30
5_25665154	AT5G64130	AT5G64130.1,AT5G64130.3,AT5G64130.2	AT5G64130	-	T	C	0.0127424	115	5.05121	2.36322e-30
4_16558671	AT4G34700	AT4G34700.1	CIB22	+	A	G	0.0239823	119	16.3269	2.39781e-30
1_23833835	AT1G64230	AT1G64230.1,AT1G64230.2,AT1G64230.5,AT1G64230.3,AT1G64230.4	UBC28	+	A	G	0.0176476	191	5.56227	2.58231e-30
1_26485522	AT1G70310	AT1G70310.1	SPDSYN2	-	T	C	0.125101	155	4.12206	2.69251e-30
1_5103420	AT1G14810	AT1G14810.1,AT1G14810.2	AT1G14810	-	T	C	0.0836136	174	3.17738	2.88454e-30
3_3321513	AT3G10620	AT3G10620.1	NUDT26	+	A	G	0.236979	91	16.6679	2.89061e-30
5_23516360	AT5G58110	AT5G58110.1	AT5G58110	+	A	G	0.0543605	187	3.84007	2.97596e-30
3_18504780	AT3G49910	AT3G49910.1	RPL26A	+	A	G	0.0116305	103	5.92155	3.06573e-30
3_87492	AT3G01280	AT3G01280.1	VDAC1	+	A	G	0.0143278	107	5.94339	3.12407e-30
1_19475201	AT1G52300	AT1G52300.1	RPL37B	-	T	C	0.00895427	112	5.01986	3.42938e-30
5_22350379	AT5G55070	AT5G55070.1,AT5G55070.2	AT5G55070	+	A	G	0.0417391	96	15.1726	3.47303e-30
4_16339804	AT4G34110	AT4G34110.1	PAB2	+	A	G	0.600126	3803	2.79019	3.50652e-30
2_9553972	AT2G22490	AT2G22490.1,AT2G22490.2	CYCD2-1	-	T	C	0.246612	91	5.97695	3.70598e-30
4_796399	AT4G01850	AT4G01850.1,AT4G01850.2	SAM2	-	T	C	0.0220054	194	3.27654	3.79805e-30
3_6453848	AT3G18740	AT3G18740.1	RPL30C	+	A	G	0.0224029	135	3.98073	3.98029e-30
3_258416	AT3G01690	AT3G01690.1	AT3G01690	+	A	G	0.119647	95	5.44331	4.12814e-30
2_11842542	AT2G27775	AT2G27775.1	AT2G27775	-	T	C	0.211031	88	16.3717	4.24913e-30
4_1331831	AT4G03020	AT4G03020.1,AT4G03020.3,AT4G03020.2	AT4G03020	-	T	C	0.100182	110	6.9402	4.32778e-30
1_2408490	AT1G07770	AT1G07770.3,AT1G07770.2,AT1G07770.1	RPS15AA	-	T	C	0.00807081	93	16.2383	4.56571e-30
2_14650026	AT2G34720	AT2G34720.1,AT2G34720.2,AT2G34720.3	NFYA4	-	T	C	0.244275	128	3.84357	4.67378e-30
1_2408764	AT1G07770	AT1G07770.3,AT1G07770.2,AT1G07770.1	RPS15AA	-	T	C	0.00764601	94	16.1861	5.06981e-30
1_1077995	AT1G04140	AT1G04140.1,AT1G04140.2	AT1G04140	-	T	C	0.231447	184	2.49278	5.20833e-30
4_16370168	AT4G34180	AT4G34180.1	AT4G34180	-	T	C	0.0389421	187	5.39939	5.28879e-30
4_17788238	AT4G37830	AT4G37830.1,AT4G37830.3,AT4G37830.2	COX6A	-	T	C	0.00708601	130	6.0166	5.33231e-30
4_14254199	AT4G28880	AT4G28880.4,AT4G28880.1,AT4G28880.2,AT4G28880.3	ckl3	+	A	G	0.0765799	103	6.91192	5.51003e-30
1_8263417	AT1G23290	AT1G23290.1	RPL27AB	+	A	G	0.0161558	107	5.3633	5.56395e-30
3_20389258	AT3G55020	AT3G55020.1,AT3G55020.3,AT3G55020.2	AT3G55020	-	T	C	0.104888	103	5.89592	5.63496e-30
5_1252091	AT5G04430	AT5G04430.1,AT5G04430.2	BTR1	-	T	C	0.0280603	149	3.47881	5.66449e-30
3_16918226	AT3G46060	AT3G46060.1,AT3G46060.2,AT3G46060.3	RABE1C	+	A	G	0.043607	162	3.00596	5.73866e-30
5_25972414	AT5G65010	AT5G65010.1,AT5G65010.2	ASN2	+	A	G	0.298246	85	15.5741	5.76661e-30
3_21995848	AT3G59540	AT3G59540.1	RPL38B	-	T	C	0.0936368	724	5.58382	5.8315e-30
2_12769183	AT2G29960	AT2G29960.3,AT2G29960.1,AT2G29960.2	CYP19-4	-	T	C	0.0654022	100	6.88348	5.89744e-30
3_3481300	AT3G11120	AT3G11120.1	RPL41E	+	A	G	0.0240123	141	5.885	6.12994e-30
3_17336661	AT3G47060	AT3G47060.1	FTSH7	+	A	G	0.2875	92	17.465	6.33461e-30
1_2054106	AT1G06700	AT1G06700.1,AT1G06700.2,AT1G06700.3	PTI11	-	T	C	0.152955	132	3.27587	6.34953e-30
4_18113992	AT4G38800	AT4G38800.1	MTN1	-	T	C	0.0216574	121	4.53296	6.34953e-30
3_20556077	AT3G55440	AT3G55440.1	CTIMC	+	A	G	0.00827937	101	16.6477	6.43993e-30
1_23535605	AT1G63460	AT1G63460.1	GPX8	+	A	G	0.0597771	118	4.67518	6.59023e-30
1_8507654	AT1G24050	AT1G24050.1	AT1G24050	+	A	G	0.050886	112	4.50849	6.72482e-30
3_2605892	AT3G08580	AT3G08580.2,AT3G08580.1	AAC1	-	T	C	0.00452878	121	4.33949	6.98778e-30
4_9027432	AT4G15900	AT4G15900.1	PRL1	+	A	G	0.0737397	98	16.0147	6.99383e-30
5_6679774	AT5G19760	AT5G19760.1	DTC	-	T	C	0.0127056	95	6.85806	7.14052e-30
5_14632319	AT5G37020	AT5G37020.1,AT5G37020.3,AT5G37020.2	ARF8	+	A	G	0.360704	123	3.17397	7.29182e-30
1_2408938	AT1G07770	AT1G07770.3,AT1G07770.2,AT1G07770.1	RPS15AA	-	T	C	0.125484	1523	2.63727	7.435e-30
1_1189483	AT1G04410	AT1G04410.1	MDH1	-	T	C	0.00639669	139	3.62785	8.49491e-30
1_24541605	AT1G65930	AT1G65930.1	CICDH	+	A	G	0.00743776	118	4.19436	8.59466e-30
4_13803672	AT4G27650	AT4G27650.1,AT4G27650.2,AT4G27650.3	PEL1	-	T	C	0.299065	96	16.0643	8.66012e-30
5_24653488	AT5G61310	AT5G61310.4,AT5G61310.5,AT5G61310.1,AT5G61310.3,AT5G61310.6,AT5G61310.2	AT5G61310	-	T	C	0.191446	94	6.88004	8.86672e-30
4_37541	AT4G00100	AT4G00100.1	RPS13B	+	A	G	0.00981756	120	4.47994	9.54601e-30
1_1079414	AT1G04140	AT1G04140.1,AT1G04140.2	AT1G04140	-	T	C	0.202925	222	2.76548	9.71033e-30
1_27540294	AT1G73230	AT1G73230.1	AT1G73230	-	T	C	0.0883424	97	16.2921	1.00161e-29
5_6786458	AT5G20080	AT5G20080.1	CBR2	+	A	G	0.039612	98	15.0613	1.10548e-29
1_7926883	AT1G22450	AT1G22450.1	COX6B-1	+	A	G	0.0194754	98	6.84536	1.12896e-29
1_2973190	AT1G09210	AT1G09210.1	CRT2	-	T	C	0.0203015	136	3.96211	1.1703e-29
2_14661411	AT2G34750	AT2G34750.1	AT2G34750	-	T	C	0.110419	124	3.97327	1.29142e-29
4_13605170	AT4G27130	AT4G27130.1	AT4G27130	-	T	C	0.0303486	121	5.97531	1.34776e-29
4_6174727	AT4G09800	AT4G09800.1	RPS18A	+	A	G	0.0160927	150	6.9548	1.34843e-29
2_8124758	AT2G18740	AT2G18740.1,AT2G18740.2	AT2G18740	+	A	G	0.105566	110	6.81534	1.36393e-29
2_15350509	AT2G36620	AT2G36620.1	RPL24A	-	T	C	0.0364568	121	5.35005	1.40848e-29
1_2113127	AT1G06890	AT1G06890.1,AT1G06890.3,AT1G06890.4,AT1G06890.2	AT1G06890	-	T	C	0.14797	215	2.18598	1.44238e-29
1_2939823	AT1G09130	AT1G09130.1,AT1G09130.3	CLPR3	-	T	C	0.0920245	90	14.9694	1.46473e-29
3_21995863	AT3G59540	AT3G59540.1	RPL38B	-	T	C	0.190298	1526	3.3594	1.53511e-29
4_14382321	AT4G29160	AT4G29160.1,AT4G29160.3,AT4G29160.2	VPS32.2	+	A	G	0.0662436	167	4.0763	1.59039e-29
1_7878976	AT1G22300	AT1G22300.1,AT1G22300.2,AT1G22300.3	GRF10	-	T	C	0.038038	114	6.89017	1.62595e-29
5_5246583	AT5G16060	AT5G16060.1	AT5G16060	+	A	G	0.0731707	108	5.86159	1.67881e-29
5_1574	AT5G01010	AT5G01010.1,AT5G01010.3,AT5G01010.4,AT5G01010.2,AT5G01010.5	AT5G01010	-	T	C	0.0803571	171	4.43333	1.68137e-29
1_27928453	AT1G74270	AT1G74270.1	RPL35AC	-	T	C	0.0205146	118	4.66748	1.69072e-29
4_13546589	AT4G26970	AT4G26970.1	ACO3	+	A	G	0.037785	174	3.19551	1.77996e-29
4_14473379	AT4G29430	AT4G29430.1	RPS15AE	+	A	G	0.119458	97	6.83686	1.77996e-29
3_23053043	AT3G62290	AT3G62290.1,AT3G62290.2,AT3G62290.3	ARFA1E	+	A	G	0.00885865	207	3.43653	1.79312e-29
5_4531668	AT5G14040	AT5G14040.1	MPT3	-	T	C	0.0105429	127	4.29289	1.8446e-29
1_2537660	AT1G08110	AT1G08110.3,AT1G08110.1,AT1G08110.4,AT1G08110.2	AT1G08110	+	A	G	0.0492197	82	15.5578	1.90987e-29
4_15354793	AT4G31720	AT4G31720.1,AT4G31720.2,AT4G31720.3	TAF10	-	T	C	0.0583842	86	6.88829	1.9572e-29
4_13547555	AT4G26970	AT4G26970.1	ACO3	+	A	G	0.032133	116	4.93023	1.98598e-29
3_3011277	AT3G09810	AT3G09810.1	IDH6	+	A	G	0.20082	98	16.2004	2.18361e-29
1_17339067	AT1G47290	AT1G47290.2,AT1G47290.1	3BETAHSD/D1	+	A	G	0.241573	86	16.6342	2.25192e-29
5_25749476	AT5G64400	AT5G64400.1,AT5G64400.2,AT5G64400.3	AT5G64400	+	A	G	0.0106762	177	3.93781	2.40366e-29
1_2637565	AT1G08360	AT1G08360.1	RPL10AA	+	A	G	0.0139264	98	5.88242	2.65719e-29
2_17953230	AT2G43160	AT2G43160.2,AT2G43160.3,AT2G43160.1,AT2G43160.5,AT2G43160.4	EPSIN2	+	A	G	0.0399023	98	5.88261	2.68946e-29
4_10035741	AT4G18100	AT4G18100.1	RPL32A	-	T	C	0.0093755	118	5.96428	2.73728e-29
2_9689866	AT2G22780	AT2G22780.1	PMDH1	-	T	C	0.049459	96	16.0275	2.77356e-29
2_8515809	AT2G19750	AT2G19750.1	RPS30C	+	A	G	0.0187913	111	5.2925	2.82283e-29
1_27847649	AT1G74050	AT1G74050.1	RPL6C	-	T	C	0.0222656	137	6.913	2.84677e-29
4_17129822	AT4G36195	AT4G36195.3,AT4G36195.1,AT4G36195.2	AT4G36195	+	A	G	0.212048	88	5.95118	2.99272e-29
4_18044144	AT4G38600	AT4G38600.1,AT4G38600.3,AT4G38600.2	UPL3	-	T	C	0.20411	149	2.98472	3.03705e-29
4_6174314	AT4G09800	AT4G09800.1	RPS18A	+	A	G	0.0145174	128	4.98857	3.10156e-29
1_10769246	AT1G30450	AT1G30450.1,AT1G30450.3,AT1G30450.4	CCC1	+	A	G	0.209549	79	16.4242	3.21899e-29
5_17859848	AT5G44340	AT5G44340.1	TUBB4	-	T	C	0.026293	152	3.78994	3.22869e-29
5_24511602	AT5G60920	AT5G60920.1,AT5G60920.2	COB	-	T	C	0.0284104	126	4.48412	3.33722e-29
1_20136793	AT1G53910	AT1G53910.1,AT1G53910.2,AT1G53910.3	RAP2-12	+	A	G	0.12141	186	3.09987	3.78316e-29
5_21759462	AT5G53560	AT5G53560.1	CYTB5-E	+	A	G	0.0354437	131	3.66138	3.84161e-29
4_13447629	AT4G26650	AT4G26650.1,AT4G26650.2	AT4G26650	+	A	G	0.127173	139	4.92844	4.16538e-29
5_19168543	AT5G47200	AT5G47200.1	RABD2B	+	A	G	0.0174304	97	6.80088	4.24546e-29
5_21861428	AT5G53850	AT5G53850.2,AT5G53850.5,AT5G53850.4,AT5G53850.1,AT5G53850.6,AT5G53850.3	AT5G53850	-	T	C	0.0649264	97	6.79716	4.34471e-29
5_4530966	AT5G14040	AT5G14040.1	MPT3	-	T	C	0.0167351	110	5.90566	4.43425e-29
5_22824581	AT5G56360	AT5G56360.1	PSL4	-	T	C	0.129967	157	3.9084	4.71623e-29
2_13885530	AT2G32730	AT2G32730.1	RPN2A	+	A	G	0.183007	84	6.90158	4.7986e-29
5_25466311	AT5G63620	AT5G63620.1,AT5G63620.3,AT5G63620.2	AT5G63620	-	T	C	0.339943	120	5.33042	4.90683e-29
3_19601351	AT3G52880	AT3G52880.1,AT3G52880.2	ATMDAR1	-	T	C	0.0374415	96	6.78611	4.94498e-29
4_37276	AT4G00100	AT4G00100.1	RPS13B	+	A	G	0.0162084	145	3.34948	4.96798e-29
1_13227111	AT1G35720	AT1G35720.1	ANN1	+	A	G	0.0230126	110	4.69836	5.05167e-29
3_2917676	AT3G09500	AT3G09500.1	RPL35A	+	A	G	0.0064594	107	5.40729	5.13955e-29
5_2784067	AT5G08590	AT5G08590.1,AT5G08590.2	SRK2G	+	A	G	0.0673379	107	4.47701	5.21627e-29
3_1604050	AT3G05530	AT3G05530.1	RPT5A	+	A	G	0.0314371	105	6.82705	5.3855e-29
5_23515556	AT5G58110	AT5G58110.1	AT5G58110	+	A	G	0.0262966	108	5.28523	5.55964e-29
3_5802624	AT3G17020	AT3G17020.1,AT3G17020.2	AT3G17020	-	T	C	0.0598053	86	16.8504	5.6238e-29
1_6213878	AT1G18070	AT1G18070.1,AT1G18070.2,AT1G18070.3	AT1G18070	-	T	C	0.109113	91	15.2082	5.65331e-29
4_904212	AT4G02060	AT4G02060.1,AT4G02060.2	MCM7	+	A	G	0.256098	168	2.88719	5.93602e-29
4_16338813	AT4G34110	AT4G34110.1	PAB2	+	A	G	0.0154143	128	3.84331	6.08909e-29
5_18382119	AT5G45350	AT5G45350.2,AT5G45350.1,AT5G45350.4,AT5G45350.7,AT5G45350.6,AT5G45350.5,AT5G45350.3	AT5G45350	-	T	C	0.116667	105	6.89734	6.47634e-29
4_13189077	AT4G25970	AT4G25970.1	PSD3	+	A	G	0.0947242	79	17.5705	6.54598e-29
3_21996358	AT3G59540	AT3G59540.1	RPL38B	-	T	C	0.0146505	140	4.95755	6.7094e-29
4_13149854	AT4G25870	AT4G25870.1	AT4G25870	-	T	C	0.236467	83	15.1357	6.99619e-29
5_24281326	AT5G60360	AT5G60360.1,AT5G60360.3,AT5G60360.2	ALEU	+	A	G	0.0403668	383	2.12688	7.03587e-29
3_1604304	AT3G05530	AT3G05530.1	RPT5A	+	A	G	0.151758	397	2.44856	7.16797e-29
3_10131240	AT3G27380	AT3G27380.2,AT3G27380.1	SDH2-1	-	T	C	0.0247587	118	5.86414	7.26021e-29
5_19611734	AT5G48385	AT5G48385.1	FRL3	+	A	G	0.0919075	159	5.91257	7.32767e-29
3_18036742	AT3G48680	AT3G48680.1	GAMMACAL2	+	A	G	0.075188	110	4.98581	7.34172e-29
5_634196	AT5G02790	AT5G02790.1	GSTL3	+	A	G	0.0694534	108	5.93519	7.88443e-29
1_19103379	AT1G51510	AT1G51510.1	Y14	-	T	C	0.0399628	86	17.216	8.08881e-29
3_7110213	AT3G20390	AT3G20390.1,AT3G20390.2	RIDA	-	T	C	0.0230617	105	6.91275	8.37602e-29
1_9172487	AT1G26550	AT1G26550.1	AT1G26550	+	A	G	0.011003	121	4.69258	8.49607e-29
1_6223858	AT1G18080	AT1G18080.1	RACK1A	+	A	G	0.0161105	154	3.76679	8.50436e-29
4_16068073	AT4G33360	AT4G33360.1,AT4G33360.2,AT4G33360.3	FLDH	-	T	C	0.0310914	98	5.85194	8.63991e-29
3_18036751	AT3G48680	AT3G48680.1	GAMMACAL2	+	A	G	0.0621977	90	5.90738	8.81906e-29
1_5015017	AT1G14620	AT1G14620.1,AT1G14620.2	DECOY	-	T	C	0.108803	110	4.64207	8.99086e-29
1_1099473	AT1G04170	AT1G04170.1,AT1G04170.2	EIF2 GAMMA	+	A	G	0.0379022	86	15.0896	9.42985e-29
2_15171121	AT2G36160	AT2G36160.1	RPS14A	+	A	G	0.015299	110	4.66194	9.4823e-29
3_9157111	AT3G25150	AT3G25150.1,AT3G25150.2	AT3G25150	-	T	C	0.0724332	103	5.82378	9.49805e-29
2_7989248	AT2G18390	AT2G18390.1	ARL2	+	A	G	0.0624546	86	16.4337	9.68093e-29
4_18214838	AT4G39080	AT4G39080.1	VHA-A3	+	A	G	0.0521694	101	5.31208	9.87899e-29
5_17182291	AT5G42850	AT5G42850.2,AT5G42850.1	AT5G42850	-	T	C	0.0460882	162	3.02136	1.05018e-28
3_9849791	AT3G26780	AT3G26780.1	AT3G26780	+	A	G	0.0734507	96	5.84638	1.17392e-28
2_12769344	AT2G29960	AT2G29960.3,AT2G29960.1,AT2G29960.2	CYP19-4	-	T	C	0.0335257	122	4.07671	1.19157e-28
5_20693043	AT5G50850	AT5G50850.1	PDH2	+	A	G	0.0201144	102	16.086	1.23833e-28
1_5446270	AT1G15810	AT1G15810.1	AT1G15810	+	A	G	0.125654	96	5.8487	1.24052e-28
4_16337959	AT4G34110	AT4G34110.1	PAB2	+	A	G	0.0775524	455	1.77753	1.36704e-28
1_27540342	AT1G73230	AT1G73230.1	AT1G73230	-	T	C	0.043354	91	15.824	1.37374e-28
2_19004408	AT2G46280	AT2G46280.1,AT2G46280.2,AT2G46280.3	TIF3I1	-	T	C	0.0810659	289	2.80476	1.44545e-28
5_20693198	AT5G50850	AT5G50850.1	PDH2	+	A	G	0.0837253	89	16.2594	1.45515e-28
5_16282033	AT5G40650	AT5G40650.1,AT5G40650.2	SDH2-2	+	A	G	0.0714005	182	2.77438	1.47189e-28
4_242175	AT4G00560	AT4G00560.1,AT4G00560.2,AT4G00560.4,AT4G00560.3	AT4G00560	-	T	C	0.118812	108	5.26332	1.48479e-28
1_24559755	AT1G65980	AT1G65980.1,AT1G65980.2	PRXIIB	-	T	C	0.00683308	98	5.8486	1.56634e-28
2_18758345	AT2G45540	AT2G45540.1,AT2G45540.2,AT2G45540.5,AT2G45540.4,AT2G45540.3,AT2G45540.6	AT2G45540	-	T	C	0.21326	193	3.17511	1.58392e-28
5_4311368	AT5G13450	AT5G13450.1	ATP5	-	T	C	0.019962	147	4.22986	1.5847e-28
1_3136353	AT1G09690	AT1G09690.1	RPL21A	-	T	C	0.0203501	93	16.1847	1.5925e-28
1_17568425	AT1G47740	AT1G47740.1,AT1G47740.2,AT1G47740.3	AT1G47740	+	A	G	0.113534	151	3.05204	1.6069e-28
5_23719545	AT5G58710	AT5G58710.1	CYP20-1	+	A	G	0.0441113	103	5.7959	1.63319e-28
3_2587126	AT3G08530	AT3G08530.1	CHC2	-	T	C	0.0595677	113	15.7072	1.63845e-28
1_18236986	AT1G49300	AT1G49300.1,AT1G49300.2	RABG3E	+	A	G	0.0395997	91	6.80298	1.66377e-28
5_8438861	AT5G24650	AT5G24650.1	AT5G24650	+	A	G	0.140464	109	16.1645	1.66948e-28
1_2940058	AT1G09130	AT1G09130.1,AT1G09130.2	CLPR3	-	T	C	0.084399	99	5.30646	1.69248e-28
4_18149021	AT4G38920	AT4G38920.1,AT4G38920.2	VHA-C3	+	A	G	0.0168829	95	6.76383	1.78558e-28
1_24065233	AT1G64790	AT1G64790.1,AT1G64790.2,AT1G64790.3	ILA	-	T	C	0.177536	98	5.30066	1.79628e-28
1_6223121	AT1G18080	AT1G18080.1	RACK1A	+	A	G	0.0240874	322	2.53486	1.88183e-28
3_5669687	AT3G16640	AT3G16640.1	TCTP	-	T	C	0.0584127	1263	1.41532	1.95823e-28
1_7648656	AT1G21750	AT1G21750.1,AT1G21750.2	PDIL1-1	+	A	G	0.0235507	91	16.3501	2.01516e-28
3_3483157	AT3G11130	AT3G11130.1	CHC1	-	T	C	0.0282378	104	4.93612	2.01958e-28
2_18205845	AT2G43970	AT2G43970.1,AT2G43970.2	LARP6B	-	T	C	0.0194255	117	4.40687	2.04379e-28
2_9396681	AT2G22120	AT2G22120.1,AT2G22120.2	AT2G22120	+	A	G	0.166337	84	6.85696	2.0494e-28
1_9497766	AT1G27340	AT1G27340.1	FBX6	+	A	G	0.0812044	89	6.79468	2.11093e-28
2_14630391	AT2G34690	AT2G34690.1	ACD11	+	A	G	0.112667	169	3.67709	2.19825e-28
3_6508313	AT3G18860	AT3G18860.1,AT3G18860.2	AT3G18860	+	A	G	0.117007	86	15.3509	2.22142e-28
5_4045113	AT5G12470	AT5G12470.1	AT5G12470	-	T	C	0.0593535	112	5.25663	2.26034e-28
5_22393961	AT5G55190	AT5G55190.1	RAN3	+	A	G	0.0264682	96	5.83352	2.27522e-28
1_7245468	AT1G20840	AT1G20840.2,AT1G20840.1	MSSP1	-	T	C	0.0625315	124	3.56279	2.3154e-28
2_18319935	AT2G44350	AT2G44350.1,AT2G44350.2,AT2G44350.4,AT2G44350.3	CSY4	+	A	G	0.0208542	104	5.2773	2.34771e-28
4_9395443	AT4G16695	AT4G16695.2,AT4G16695.1,AT4G16695.4,AT4G16695.3,AT4G16695.5	AT4G16695	+	A	G	0.326923	102	3.8277	2.47711e-28
5_3258870	AT5G10360	AT5G10360.1,AT5G10360.2	RPS6B	-	T	C	0.0178684	199	2.33507	2.65297e-28
5_2828493	AT5G08690	AT5G08690.1	AT5G08690	+	A	G	0.0248154	84	15.0541	2.70645e-28
4_13107843	AT4G25740	AT4G25740.1	RPS10A	-	T	C	0.0127224	118	4.22891	2.83614e-28
5_13109472	AT5G34850	AT5G34850.1	PAP26	-	T	C	0.0194847	121	5.30061	2.87722e-28
3_21196831	AT3G57290	AT3G57290.1	EIF3E	-	T	C	0.407881	1532	2.91597	2.8868e-28
5_209564	AT5G01530	AT5G01530.1	LHCB4.1	+	A	G	0.0863382	170	2.52732	3.03964e-28
1_22195265	AT1G60170	AT1G60170.1	emb1220	+	A	G	0.149406	88	5.87846	3.2649e-28
4_7993466	AT4G13780	AT4G13780.1	AT4G13780	-	T	C	0.059448	84	15.7763	3.30425e-28
3_3482529	AT3G11130	AT3G11130.1	CHC1	-	T	C	0.0356723	91	6.77546	3.54883e-28
1_2408686	AT1G07770	AT1G07770.3,AT1G07770.2,AT1G07770.1	RPS15AA	-	T	C	0.0114092	128	5.02732	3.68462e-28
5_6990678	AT5G20660	AT5G20660.1,AT5G20660.2,AT5G20660.3,AT5G20660.4	AT5G20660	+	A	G	0.0943396	125	3.77948	3.72292e-28
5_26959389	AT5G67590	AT5G67590.1	FRO1	+	A	G	0.0779525	233	3.72302	3.76384e-28
3_21353048	AT3G57650	AT3G57650.1	LPAT2	+	A	G	0.220183	72	16.5774	3.91643e-28
5_19572499	AT5G48300	AT5G48300.1	APS1	+	A	G	0.469091	387	2.44485	3.99944e-28
1_20576774	AT1G55150	AT1G55150.1,AT1G55150.2	RH20	+	A	G	0.26484	116	3.86916	4.12577e-28
2_8832674	AT2G20490	AT2G20490.1,AT2G20490.3,AT2G20490.2	NOP10	+	A	G	0.0421086	131	3.99306	4.13301e-28
4_17098618	AT4G36130	AT4G36130.1	RPL8C	+	A	G	0.0182313	87	14.9737	4.325e-28
1_12024479	AT1G33140	AT1G33140.1	RPL9B	+	A	G	0.0109114	122	4.06394	4.4224e-28
4_1136592	AT4G02580	AT4G02580.1	AT4G02580	+	A	G	0.0217847	104	4.90941	4.53659e-28
2_15581502	AT2G37080	AT2G37080.3,AT2G37080.1,AT2G37080.2	ICR2	-	T	C	0.659341	120	3.08708	4.63737e-28
5_6581996	AT5G19510	AT5G19510.1	AT5G19510	-	T	C	0.0124953	165	4.44913	4.69993e-28
3_5670308	AT3G16640	AT3G16640.1	TCTP	-	T	C	0.0170346	385	2.79632	4.79037e-28
4_12551915	AT4G24190	AT4G24190.1,AT4G24190.2	SHD	-	T	C	0.0308659	113	5.74965	4.83106e-28
5_26429800	AT5G66100	AT5G66100.1,AT5G66100.2	LARP1B	+	A	G	0.371287	75	6.95127	5.04622e-28
1_4150455	AT1G12230	AT1G12230.1,AT1G12230.2	AT1G12230	+	A	G	0.0432383	94	5.30932	5.07442e-28
1_9563614	AT1G27530	AT1G27530.1	AT1G27530	-	T	C	0.0234893	124	3.70946	5.07442e-28
5_25393731	AT5G63400	AT5G63400.1,AT5G63400.2	ADK1	-	T	C	0.0112241	85	16.6983	5.33639e-28
1_10859141	AT1G30630	AT1G30630.1	AT1G30630	-	T	C	0.0471414	141	3.89155	5.47146e-28
4_6733232	AT4G11010	AT4G11010.1	NDPK3	-	T	C	0.0102691	108	5.31151	5.55507e-28
2_3046395	AT2G07340	AT2G07340.1,AT2G07340.2	PFD1	+	A	G	0.0951123	144	4.02281	5.58042e-28
1_11196003	AT1G31300	AT1G31300.1,AT1G31300.2,AT1G31300.3	AT1G31300	+	A	G	0.376206	117	5.31692	5.69718e-28
5_3710151	AT5G11560	AT5G11560.1	AT5G11560	-	T	C	0.023089	103	4.92122	5.82237e-28
1_11689246	AT1G32400	AT1G32400.1,AT1G32400.2,AT1G32400.3	TOM2A	-	T	C	0.108723	86	15.2222	5.90041e-28
5_16676791	AT5G41700	AT5G41700.1,AT5G41700.5,AT5G41700.3,AT5G41700.2,AT5G41700.4	UBC8	+	A	G	0.0107373	120	3.74324	5.98067e-28
4_16337760	AT4G34110	AT4G34110.1	PAB2	+	A	G	0.0891422	610	2.82199	6.18461e-28
4_547834	AT4G01320	AT4G01320.1,AT4G01320.2,AT4G01320.3	FACE1	+	A	G	0.0686456	111	4.07379	6.53109e-28
1_2420506	AT1G07810	AT1G07810.1	ECA1	+	A	G	0.13947	100	5.25101	6.89859e-28
2_19501374	AT2G47510	AT2G47510.1,AT2G47510.3,AT2G47510.2	FUM1	+	A	G	0.0177851	97	5.79558	7.50071e-28
2_11463690	AT2G26890	AT2G26890.1	GRV2	-	T	C	0.185022	126	3.63703	8.31417e-28
4_17007305	AT4G35905	AT4G35905.1	AT4G35905	-	T	C	0.138696	100	5.30147	8.55172e-28
5_1289697	AT5G04510	AT5G04510.1,AT5G04510.3,AT5G04510.2	PDPK1	+	A	G	0.56621	124	3.89844	8.5552e-28
3_3778618	AT3G11940	AT3G11940.2,AT3G11940.1	RPS5B	-	T	C	0.00723621	129	3.64943	8.71505e-28
3_20556190	AT3G55440	AT3G55440.1	CTIMC	+	A	G	0.0126917	96	16.8936	9.32464e-28
1_5624651	AT1G16470	AT1G16470.1,AT1G16470.2	PAB1	+	A	G	0.0429936	108	4.86001	9.68675e-28
5_18663388	AT5G46020	AT5G46020.1	AT5G46020	-	T	C	0.025563	84	16.5225	9.74666e-28
[truncated: 17,243 more rows]

## Sheet: GENES_ECT2-HT_roots
GENE	NAME	STRAND	TRANSCRIPTS	TPM	HITS	IDs	p-adj	PROP	log2FC	MISMATCH TYPE
AT1G11650	RBP45B	+	AT1G11650.2,AT1G11650.1	242.064467,0.0838872	16	1_3917952,1_3917865,1_3917899,1_3917965,1_3917838,1_3917922,1_3917940,1_3914975,1_3917998,1_3917920,1_3917779,1_3917826,1_3917916,1_3914909,1_3917799,1_3915601	0,1.09e-191,5.23e-34,5.28e-20,5.12e-17,6.14e-14,2.24e-13,3.64e-12,1.07e-09,5.96e-09,6.62e-07,1.16e-06,7.82e-06,9.46e-06,0.000529,0.00158	0.315,0.102,0.0224,0.0144,0.0124,0.00834,0.00926,0.0213,0.00777,0.00726,0.00402,0.00363,0.00577,0.0117,0.00204,0.00379	6.87,6.61,5.15,6.28,3.9,14.9,5.73,2.4,5.32,3.82,3.59,3.95,4.71,2.85,4.16,4.01	A:G,A:G,A:G,A:G,A:G,A:G,A:G,A:G,A:G,A:G,A:G,A:G,A:G,A:G,A:G,A:G
AT1G72020	AT1G72020	-	AT1G72020.1	584.1307342	16	1_27109424,1_27109417,1_27109736,1_27109405,1_27109454,1_27109398,1_27109522,1_27110294,1_27109411,1_27109521,1_27109399,1_27109468,1_27109418,1_27110293,1_27110261,1_27109711	0,1.29e-156,4.02e-108,3.82e-69,1.05e-44,6.7e-35,5.7e-27,4.36e-18,2.18e-14,3.81e-14,9.04e-14,6.9e-11,9.82e-11,7.17e-05,0.000325,0.00134	0.352,0.125,0.0421,0.0569,0.0228,0.0252,0.0138,0.00619,0.00954,0.0075,0.00926,0.00526,0.00814,0.00153,0.000953,0.000777	5.51,8.38,3.91,8.14,7.43,7.07,6.8,4.71,15.5,4.86,15,13.6,5.45,4.41,12.6,13.3	T:C,T:C,T:C,T:C,T:C,T:C,T:C,T:C,T:C,T:C,T:C,T:C,T:C,T:C,T:C,T:C
AT2G20360	AT2G20360	+	AT2G20360.1	264.3670044	40	2_8789117,2_8789073,2_8788785,2_8788994,2_8789072,2_8788640,2_8786093,2_8788483,2_8788262,2_8789251,2_8789277,2_8788188,2_8789333,2_8787760,2_8787297,2_8789174,2_8788831,2_8789252,2_8789415,2_8789157,2_8789148,2_8789160,2_8787818,2_8786145,2_8789071,2_8789409,2_8789250,2_8788965,2_8789048,2_8786371,2_8786894,2_8788197,2_8788260,2_8788206,2_8789156,2_8787803,2_8787296,2_8786898,2_8789007,2_8788800	0,3.75e-165,2.07e-128,8.73e-31,1.49e-30,4.1e-26,6.07e-25,4.76e-23,1.97e-21,4.07e-18,5.28e-17,8.08e-13,2.89e-12,2.22e-09,2.29e-09,1.19e-08,2.9e-08,3.44e-08,4.43e-08,5.78e-07,2.26e-06,5.05e-06,7.76e-06,8.83e-06,4.24e-05,5.06e-05,5.38e-05,5.59e-05,6.25e-05,6.26e-05,0.000103,0.000103,0.000133,0.000154,0.000224,0.000469,0.000886,0.00138,0.00154,0.00269	0.53,0.166,0.107,0.0834,0.0235,0.0228,0.0333,0.0247,0.0523,0.0339,0.0315,0.0134,0.0386,0.00971,0.00657,0.00974,0.00411,0.0154,0.606,0.00727,0.0086,0.0102,0.00335,0.00615,0.00359,0.222,0.015,0.00317,0.00324,0.00487,0.00793,0.00188,0.00328,0.00231,0.00559,0.00178,0.00225,0.00268,0.00239,0.00136	6.74,6.93,3.69,3.03,16.5,3.47,5.15,3.53,2.57,15,15.4,2.95,15.7,3.21,5.28,14.6,15.3,13.8,14.4,14.7,4.81,4.78,12.9,3.91,13.2,13.6,4.53,4.37,13,2.73,2.02,13.1,3.56,14.4,4.23,12.6,13,3.33,13.6,13.1	A:G,A:G,A:G,A:G,A:G,A:G,A:G,A:G,A:G,A:G,A:G,A:G,A:G,A:G,A:G,A:G,A:G,A:G,A:G,A:G,A:G,A:G,A:G,A:G,A:G,A:G,A:G,A:G,A:G,A:G,A:G,A:G,A:G,A:G,A:G,A:G,A:G,A:G,A:G,A:G
AT2G31490	AT2G31490	+	AT2G31490.1	625.6023538	19	2_13413056,2_13412205,2_13413069,2_13412088,2_13412992,2_13412975,2_13413055,2_13413050,2_13413014,2_13412058,2_13413114,2_13413031,2_13412963,2_13412052,2_13413049,2_13413061,2_13412174,2_13413100,2_13412958	0,8.97e-100,3.4e-61,1.08e-42,5.19e-38,1.37e-34,2.81e-27,2.9e-21,1e-19,1.04e-19,3.39e-13,9.02e-12,1.83e-10,2.54e-10,1.25e-09,3.16e-06,8.31e-06,0.00644,0.00943	0.321,0.0458,0.0415,0.0243,0.0161,0.0179,0.0163,0.0119,0.0137,0.0239,0.0269,0.00652,0.00368,0.00967,0.00492,0.0035,0.00228,0.00502,0.00139	7.98,5.12,17.2,7.35,7.17,4.74,5.78,15.4,6.34,4.19,15.2,5.56,5.42,5.4,14.1,13.6,4.63,3.76,2.57	A:G,A:G,A:G,A:G,A:G,A:G,A:G,A:G,A:G,A:G,A:G,A:G,A:G,A:G,A:G,A:G,A:G,A:G,A:G
AT3G01560	AT3G01560	+	AT3G01560.1,AT3G01560.2	23.899983,0.751921	1	3_220892	0	0.999	29.3	A:G
AT3G08610	AT3G08610	-	AT3G08610.1	543.5413086	23	3_2615637,3_2615640,3_2616668,3_2615654,3_2615653,3_2616426,3_2615634,3_2616488,3_2615632,3_2616482,3_2615655,3_2615615,3_2616521,3_2615641,3_2615643,3_2615631,3_2615680,3_2615492,3_2616456,3_2616689,3_2616438,3_2616671,3_2615679	0,7.34e-192,6.84e-125,8.14e-68,2.14e-65,2.79e-51,2.91e-50,9.31e-49,1.59e-37,2.35e-36,1.67e-17,2.39e-14,1.23e-12,4.99e-09,4.02e-08,8.93e-08,1.92e-06,4.52e-06,0.000103,0.000213,0.000573,0.000736,0.00443	0.43,0.129,0.0532,0.0308,0.0405,0.0244,0.0255,0.323,0.0198,0.0128,0.00762,0.00716,0.00438,0.00626,0.00467,0.00569,0.00231,0.00961,0.0023,0.00142,0.00246,0.00177,0.0023	5.63,5.77,5.44,8.03,5.84,6.74,6.62,3.7,5.3,6.13,6.09,14.6,15.7,3.13,3.75,4.24,13.8,13.7,3.56,13.1,4.34,3.31,2.42	T:C,T:C,T:C,T:C,T:C,T:C,T:C,T:C,T:C,T:C,T:C,T:C,T:C,T:C,T:C,T:C,T:C,T:C,T:C,T:C,T:C,T:C,T:C
AT3G10860	AT3G10860	+	AT3G10860.1,AT3G10860.2	987.880933,0.2662352	22	3_3400483,3_3400495,3_3400560,3_3399924,3_3400504,3_3400526,3_3400492,3_3399912,3_3400581,3_3400501,3_3400540,3_3399981,3_3400537,3_3399815,3_3400557,3_3399936,3_3400489,3_3400576,3_3399935,3_3399977,3_3400506,3_3400515	0,2.66e-266,1.65e-197,1.63e-184,4e-146,1.49e-111,3.16e-103,1.04e-101,2.41e-36,5.05e-36,1.08e-23,2.14e-20,7.2e-08,6.21e-07,2.24e-06,2.41e-06,4.88e-06,2e-05,7.23e-05,0.00127,0.00271,0.00734	0.121,0.0922,0.0809,0.127,0.0386,0.0289,0.0286,0.0286,0.0175,0.0103,0.00979,0.0039,0.00267,0.0058,0.00205,0.00112,0.0015,0.00268,0.000794,0.000526,0.00092,0.000765	6.3,7.23,8.09,4.67,5.67,18.1,5.48,6,7.13,5.36,6.64,5.4,4.21,3.65,13.7,4.75,3.9,4.58,4.41,12.7,4.06,3.73	A:G,A:G,A:G,A:G,A:G,A:G,A:G,A:G,A:G,A:G,A:G,A:G,A:G,A:G,A:G,A:G,A:G,A:G,A:G,A:G,A:G,A:G
AT3G18410	AT3G18410	+	AT3G18410.1,AT3G18410.2	689.6034884,0.800985	9	3_6324404,3_6324489,3_6323751,3_6324433,3_6323276,3_6324419,3_6323304,3_6324449,3_6324517	0,4.22e-24,9.03e-12,2.03e-11,4.27e-06,8.11e-05,0.000241,0.000785,0.00294	0.277,0.0281,0.00704,0.00849,0.0026,0.00275,0.00188,0.00341,0.00846	9.3,16.7,3.65,5.4,15,13.3,4.27,4.11,3.18	A:G,A:G,A:G,A:G,A:G,A:G,A:G,A:G,A:G
AT3G52300	ATPQ	+	AT3G52300.1,AT3G52300.2	855.7550656,0.1226044	32	3_19398150,3_19397879,3_19398115,3_19397848,3_19398147,3_19397837,3_19397694,3_19397878,3_19396677,3_19397845,3_19397843,3_19396687,3_19397857,3_19398058,3_19398151,3_19398278,3_19396688,3_19396689,3_19398179,3_19397882,3_19397867,3_19398049,3_19398091,3_19396793,3_19397294,3_19397296,3_19398146,3_19396730,3_19396843,3_19397680,3_19397670,3_19397834	0,1.99e-277,4.9e-187,1.11e-100,3.69e-95,2.57e-67,3.4e-47,2.88e-43,1.76e-24,7.7e-21,1.26e-19,1.68e-14,2.37e-14,1.34e-12,1.88e-12,8.71e-11,5.35e-10,1.23e-09,8.34e-09,1.5e-08,5e-08,1.3e-07,5.77e-06,7.11e-06,1.22e-05,3.48e-05,4.93e-05,0.000167,0.00102,0.00312,0.00337,0.00766	0.21,0.102,0.113,0.0371,0.0553,0.0196,0.0103,0.0099,0.0178,0.00525,0.0046,0.0074,0.00406,0.00626,0.00673,0.0164,0.0047,0.0052,0.0043,0.0027,0.00361,0.00324,0.00158,0.00136,0.000969,0.000972,0.00265,0.00126,0.000971,0.00212,0.00103,0.00125	7.48,5.91,20.7,5.56,8.8,5.18,6.02,16.6,4.26,4.95,6.3,5.87,4.54,3.33,4.85,13.9,13.5,4.47,5.21,4.39,3.03,3.37,13.9,2.54,4.62,4.56,4.42,3.54,2.72,1.51,2.51,2.9	A:G,A:G,A:G,A:G,A:G,A:G,A:G,A:G,A:G,A:G,A:G,A:G,A:G,A:G,A:G,A:G,A:G,A:G,A:G,A:G,A:G,A:G,A:G,A:G,A:G,A:G,A:G,A:G,A:G,A:G,A:G,A:G
AT3G55440	CTIMC	+	AT3G55440.1	941.9090438	30	3_20556090,3_20556187,3_20556273,3_20555299,3_20556089,3_20556188,3_20556077,3_20556190,3_20555893,3_20554575,3_20555885,3_20556189,3_20555515,3_20555762,3_20554547,3_20555524,3_20553828,3_20554224,3_20555704,3_20555569,3_20555749,3_20556078,3_20556272,3_20556117,3_20555543,3_20556162,3_20555862,3_20556246,3_20553829,3_20556132	0,7.07e-145,9.36e-129,1.03e-49,9.79e-44,5.92e-32,6.44e-30,9.32e-28,8.4e-20,3.2e-18,2.33e-15,2.48e-13,5.51e-13,6.5e-12,2.36e-11,3.81e-11,6.94e-08,1.11e-07,1.16e-07,3.05e-07,3.88e-07,1.78e-06,2.3e-05,0.00047,0.000765,0.00145,0.00241,0.00247,0.00416,0.00935	0.253,0.0687,0.173,0.0228,0.0133,0.0142,0.00828,0.0127,0.00639,0.00385,0.00418,0.00675,0.00235,0.0031,0.0898,0.00209,0.00159,0.00156,0.00205,0.0019,0.00167,0.00238,0.00644,0.00194,0.000671,0.0013,0.000692,0.00312,0.000758,0.00112	5.89,8.19,7.01,4.38,5.94,17.1,16.6,16.9,3.63,3.5,3.62,4.82,3.59,4.08,1.84,3.82,13.9,3.43,2.56,3.04,3.33,3.93,14.5,2.98,3.96,13,13,11.9,3.63,13.7	A:G,A:G,A:G,A:G,A:G,A:G,A:G,A:G,A:G,A:G,A:G,A:G,A:G,A:G,A:G,A:G,A:G,A:G,A:G,A:G,A:G,A:G,A:G,A:G,A:G,A:G,A:G,A:G,A:G,A:G
AT4G14320	RPL36AB	-	AT4G14320.1	873.3785556	2	4_8242712,4_8242710	0,2.98e-07	0.376,0.00371	6.19,4.12	T:C,T:C
AT4G21105	AT4G21105	+	AT4G21105.1,AT4G21105.3,AT4G21105.2	444.6480354,0.5757866,0	20	4_11266799,4_11266690,4_11266724,4_11266715,4_11266414,4_11266723,4_11266399,4_11266772,4_11266393,4_11266783,4_11266413,4_11266693,4_11266960,4_11266721,4_11266832,4_11267032,4_11266807,4_11266755,4_11266840,4_11266727	0,2.17e-223,1.27e-197,9.35e-139,1.6e-108,1.04e-72,2.54e-45,4.8e-25,1.09e-20,1.66e-18,3.14e-17,1.02e-12,1.41e-08,1.85e-07,1.33e-06,1.74e-06,4.4e-06,4.46e-05,0.00057,0.00212	0.216,0.126,0.0688,0.047,0.0953,0.029,0.0224,0.00918,0.00688,0.00655,0.00877,0.00618,0.328,0.0022,0.00502,0.708,0.00271,0.00203,0.00339,0.00171	9.4,7.75,8.77,6.36,4.93,18.6,6.07,6.62,16.4,16,4.98,15.8,3.81,14.8,4.01,3.83,14.7,4.49,13.6,4.25	A:G,A:G,A:G,A:G,A:G,A:G,A:G,A:G,A:G,A:G,A:G,A:G,A:G,A:G,A:G,A:G,A:G,A:G,A:G,A:G
AT4G34110	PAB2	+	AT4G34110.1	450.0574762	113	4_16339708,4_16338016,4_16337578,4_16339582,4_16337904,4_16338526,4_16339580,4_16339245,4_16337238,4_16337869,4_16336786,4_16338513,4_16336936,4_16338156,4_16339264,4_16339274,4_16337663,4_16339189,4_16336967,4_16336815,4_16336757,4_16337237,4_16338898,4_16339569,4_16339804,4_16338813,4_16337959,4_16337760,4_16339554,4_16336921,4_16338119,4_16339693,4_16339882,4_16337325,4_16337648,4_16337338,4_1…	0,1.8e-155,4.64e-115,8.89e-85,1.42e-84,1.1e-81,3.35e-81,5.66e-76,3.66e-74,4.89e-74,1.33e-70,3.55e-70,1.46e-67,1.48e-53,1.6e-49,1.75e-48,2.62e-42,1.76e-41,2.23e-41,1.24e-38,2.73e-35,5.45e-33,6e-32,2.01e-31,3.51e-30,6.09e-29,1.37e-28,6.18e-28,2.69e-27,5.33e-25,2.11e-24,2.13e-23,4.86e-23,1.05e-22,7.67e-21,2.44e-20,7.77e-20,1.25e-19,2.53e-19,7.19e-19,1.8e-17,2.65e-17,7.44e-17,9.84e-17,5.75e-16,2.43e-…	0.199,0.11,0.0788,0.0428,0.0538,0.0358,0.0323,0.0297,0.032,0.0546,0.0366,0.0313,0.0474,0.0236,0.0173,0.0297,0.0904,0.119,0.0191,0.0124,0.0171,0.0413,0.115,0.56,0.6,0.0154,0.0776,0.0891,0.00968,0.128,0.0118,0.00777,0.0126,0.0115,0.015,0.0126,0.0157,0.016,0.0104,0.0193,0.194,0.00661,0.0116,0.00563,0.00703,0.00941,0.00833,0.00798,0.00661,0.00685,0.0996,0.00909,0.0052,0.00563,0.00757,0.0174,0.0046,0.…	6.07,6.19,4.83,4.27,5.34,6.09,6.75,4.91,4.42,6.72,4.32,4.48,3.56,5.18,5.14,4.19,2.97,3.94,3.91,5.72,4.37,1.99,2.4,1.95,2.79,3.84,1.78,2.82,4.05,2.5,4.46,5.59,17.3,5.53,3.2,4.5,3.4,2.58,15.6,2.99,1.57,5.18,4.74,15.8,6.02,5.05,4.88,16.7,4.86,14.6,3,3.28,3.71,5.64,2.58,5.62,5.56,15,14.8,15.4,5.47,5.43,4.1,2.77,4.48,3.08,3.04,5.2,5.2,5.15,3.47,3.89,1.44,4.17,5.11,3.69,2.77,13.6,15,4.75,14.8,4.76,4.75…	A:G,A:G,A:G,A:G,A:G,A:G,A:G,A:G,A:G,A:G,A:G,A:G,A:G,A:G,A:G,A:G,A:G,A:G,A:G,A:G,A:G,A:G,A:G,A:G,A:G,A:G,A:G,A:G,A:G,A:G,A:G,A:G,A:G,A:G,A:G,A:G,A:G,A:G,A:G,A:G,A:G,A:G,A:G,A:G,A:G,A:G,A:G,A:G,A:G,A:G,A:G,A:G,A:G,A:G,A:G,A:G,A:G,A:G,A:G,A:G,A:G,A:G,A:G,A:G,A:G,A:G,A:G,A:G,A:G,A:G,A:G,A:G,A:G,A:G,A:G,A:G,A:G,A:G,A:G,A:G,A:G,A:G,A:G,A:G,A:G,A:G,A:G,A:G,A:G,A:G,A:G,A:G,A:G,A:G,A:G,A:G,A:G,A:G,A:G,A:G…
AT4G34700	CIB22	+	AT4G34700.1	712.9504364	30	4_16558578,4_16558584,4_16558627,4_16558591,4_16558612,4_16558626,4_16558580,4_16558573,4_16558645,4_16558370,4_16558546,4_16558613,4_16558671,4_16558619,4_16558579,4_16558379,4_16558574,4_16558395,4_16558673,4_16558605,4_16558625,4_16558560,4_16558192,4_16558662,4_16557144,4_16558394,4_16558350,4_16558598,4_16558377,4_16558325	0,0,0,1.21e-300,3.04e-160,2.6e-115,1.46e-112,1.69e-86,4.48e-64,4.04e-57,7.99e-57,3.54e-44,2.4e-30,1.42e-25,9.86e-22,1.32e-13,1.12e-10,3.22e-09,1.61e-08,8.53e-08,7.63e-07,1.32e-06,8.45e-06,8.92e-06,3.53e-05,0.000104,0.000175,0.00177,0.00218,0.00494	0.296,0.202,0.357,0.166,0.0838,0.0638,0.0519,0.0363,0.0422,0.0178,0.0216,0.803,0.024,0.0262,0.00982,0.00579,0.00577,0.00394,0.0058,0.00402,0.00336,0.00342,0.00379,0.00402,0.00228,0.00186,0.00205,0.00221,0.00126,0.000854	8.35,9.32,11.5,7.71,19.6,19.2,18.9,18.4,7.9,17.7,6.2,4.03,16.3,6.68,6.34,4.34,15.1,5.2,13.7,4.97,12.9,4.77,2.51,14.1,2.06,4.3,2.58,3.17,3.89,3.61	A:G,A:G,A:G,A:G,A:G,A:G,A:G,A:G,A:G,A:G,A:G,A:G,A:G,A:G,A:G,A:G,A:G,A:G,A:G,A:G,A:G,A:G,A:G,A:G,A:G,A:G,A:G,A:G,A:G,A:G
AT5G08670	AT5G08670	-	AT5G08670.1	738.2935922	40	5_2818412,5_2818277,5_2819245,5_2818396,5_2818365,5_2818441,5_2820887,5_2819611,5_2818261,5_2820932,5_2818420,5_2818330,5_2820138,5_2820308,5_2820926,5_2819172,5_2818483,5_2819734,5_2818492,5_2820920,5_2819356,5_2820948,5_2819199,5_2818448,5_2818242,5_2818383,5_2818395,5_2820321,5_2818329,5_2820910,5_2820935,5_2819270,5_2818473,5_2819346,5_2820933,5_2820150,5_2819726,5_2821068,5_2818828,5_2819985	0,4.46e-56,2.18e-31,1.65e-30,3.25e-26,4.96e-26,2.91e-25,2.4e-23,5.13e-19,3.83e-18,7.46e-16,6.94e-13,1.92e-12,8.31e-12,1.02e-11,1.87e-11,6.09e-11,7.19e-11,8.9e-10,9.31e-10,1.37e-09,4.23e-09,1.26e-08,1.73e-08,8.86e-08,3.47e-07,1.83e-06,1.91e-05,2.15e-05,5.13e-05,5.77e-05,8.76e-05,0.000157,0.000249,0.000258,0.000457,0.000533,0.0041,0.00649,0.00799	0.278,0.0485,0.0132,0.0138,0.0142,0.0165,0.0167,0.00863,0.018,0.00957,0.0114,0.0121,0.013,0.00664,0.0108,0.00504,0.00466,0.00381,0.00473,0.00615,0.00396,0.00559,0.00302,0.0033,0.00861,0.00505,0.00397,0.00138,0.00494,0.00285,0.00441,0.00123,0.00202,0.000977,0.00453,0.00128,0.000949,0.00153,0.0016,0.0011	7.18,7.81,3.66,17.5,5.24,4.26,2.85,3.28,5.36,3.77,3.06,5.75,2.52,2.57,2.32,4.24,4.15,2.65,3.69,3.32,2.66,3.21,4.37,5.18,14.4,3.36,4,12.7,14.2,2.98,2.24,12.6,4.38,12.7,1.86,14.1,3.45,3.88,2.44,2.95	T:C,T:C,T:C,T:C,T:C,T:C,T:C,T:C,T:C,T:C,T:C,T:C,T:C,T:C,T:C,T:C,T:C,T:C,T:C,T:C,T:C,T:C,T:C,T:C,T:C,T:C,T:C,T:C,T:C,T:C,T:C,T:C,T:C,T:C,T:C,T:C,T:C,T:C,T:C,T:C
AT5G56670	RPS30C	-	AT5G56670.1	1857.6187158	7	5_22935404,5_22935408,5_22935764,5_22935373,5_22935769,5_22935989,5_22935766	0,3.17e-22,2.73e-11,3.39e-07,7.83e-05,0.00453,0.00513	0.108,0.00753,0.00261,0.00327,0.00146,0.00134,0.000598	5.3,3.98,3.8,4.04,3.04,3.8,3.79	T:C,T:C,T:C,T:C,T:C,T:C,T:C
AT5G59613	AT5G59613	-	AT5G59613.2,AT5G59613.1	1013.7826256,4.1225016	20	5_24015619,5_24016508,5_24015610,5_24016511,5_24015704,5_24016509,5_24016177,5_24015690,5_24015658,5_24016510,5_24015629,5_24016204,5_24015606,5_24015564,5_24015630,5_24016516,5_24015627,5_24016506,5_24016502,5_24015617	0,5.68e-286,9.93e-96,3.04e-95,5.88e-91,4.39e-68,4.59e-66,4.07e-60,3.33e-42,8.56e-41,6.41e-34,3.55e-27,3.89e-26,3.08e-08,4.22e-06,7.26e-06,3.04e-05,0.000175,0.00106,0.00898	0.239,0.146,0.0483,0.0476,0.0238,0.0304,0.379,0.0191,0.843,0.0208,0.0118,0.0116,0.0114,0.00535,0.00228,0.00574,0.00194,0.00234,0.00178,0.00193	8.76,6.62,8.73,7.61,6.51,5.78,3.84,5.66,2.65,4.36,6.08,4.46,6.63,14.3,13,2.89,4.47,3.09,3.29,3.92	T:C,T:C,T:C,T:C,T:C,T:C,T:C,T:C,T:C,T:C,T:C,T:C,T:C,T:C,T:C,T:C,T:C,T:C,T:C,T:C
AT1G76200	AT1G76200	+	AT1G76200.1	800.9231068	10	1_28594513,1_28594560,1_28594553,1_28593421,1_28594580,1_28594597,1_28593412,1_28594592,1_28593801,1_28594529	8.21e-310,1.26e-148,2.57e-42,1.43e-39,2.24e-30,1.28e-16,3.76e-09,8.47e-07,4.36e-05,0.000323	0.132,0.113,0.0205,0.0102,0.0174,0.00935,0.00386,0.00336,0.00172,0.00311	7.61,4.65,7.49,6.31,6.99,6.08,3.95,4.9,14.5,2.45	A:G,A:G,A:G,A:G,A:G,A:G,A:G,A:G,A:G,A:G
AT1G79530	GAPCP1	-	AT1G79530.1	294.4590038	47	1_29916247,1_29916545,1_29917296,1_29916756,1_29916125,1_29917780,1_29916986,1_29918218,1_29916267,1_29918337,1_29917977,1_29916999,1_29916998,1_29916391,1_29918370,1_29916440,1_29916040,1_29916815,1_29919051,1_29918217,1_29916418,1_29917030,1_29918366,1_29917539,1_29916789,1_29917004,1_29916445,1_29916373,1_29916220,1_29915991,1_29917732,1_29918994,1_29917768,1_29917549,1_29916565,1_29916168,1_2…	5.85e-309,6.06e-77,2.86e-27,2.94e-23,7.34e-22,8.42e-21,2.77e-17,7.92e-17,5.14e-16,1.38e-14,1.75e-13,4.88e-13,5.93e-13,8.59e-13,1.23e-12,1.2e-11,4.33e-11,1.43e-10,1.13e-09,1.86e-09,1.99e-09,2.24e-08,2.56e-08,7.54e-08,2.81e-07,2.98e-07,4.45e-07,4.89e-07,7.56e-07,7.78e-07,1.15e-06,1.5e-06,6.92e-06,1.06e-05,1.76e-05,2e-05,2.59e-05,5.12e-05,6.14e-05,9.78e-05,0.000188,0.000519,0.000557,0.00103,0.00104,…	0.258,0.0575,0.0306,0.0132,0.0227,0.0217,0.00823,0.0533,0.00904,0.0356,0.00781,0.00703,0.00827,0.0144,0.00616,0.00586,0.0181,0.00562,0.00399,0.0054,0.00438,0.00487,0.00455,0.00587,0.00401,0.00527,0.00306,0.00388,0.00597,0.0311,0.00434,0.00296,0.00411,0.00579,0.00297,0.00423,0.00442,0.00428,0.00658,0.00869,0.00301,0.00376,0.00229,0.00203,0.00186,0.0017,0.00216	5.28,4.66,3.99,5.64,15.7,4.07,16.3,2.31,15,2.55,16.2,5.7,14.2,2.89,4.76,5.55,5.46,4.56,15.6,4.41,15.8,5.11,4.24,5.06,3.63,3.63,12.8,4.89,3.99,13.3,14.3,4.77,4.66,2.68,4.55,12.4,2.98,4.42,2.52,2.99,13.8,2.98,4.14,3.28,14.1,3.86,2.95	T:C,T:C,T:C,T:C,T:C,T:C,T:C,T:C,T:C,T:C,T:C,T:C,T:C,T:C,T:C,T:C,T:C,T:C,T:C,T:C,T:C,T:C,T:C,T:C,T:C,T:C,T:C,T:C,T:C,T:C,T:C,T:C,T:C,T:C,T:C,T:C,T:C,T:C,T:C,T:C,T:C,T:C,T:C,T:C,T:C,T:C,T:C
AT1G26880	RPL34A	-	AT1G26880.1,AT1G26880.2	329.9736218,0.5477042	3	1_9315599,1_9315592,1_9315608	7.95e-303,1.11e-261,3.2e-06	0.298,0.218,0.00501	5.32,19.9,4.72	T:C,T:C,T:C
AT5G47890	AT5G47890	+	AT5G47890.1	268.5590284	20	5_19390402,5_19390394,5_19390357,5_19390398,5_19390378,5_19389003,5_19389009,5_19389013,5_19388878,5_19389030,5_19388840,5_19390309,5_19390366,5_19390388,5_19389028,5_19390505,5_19389006,5_19389093,5_19390401,5_19388841	1.03e-297,2.72e-182,4.16e-167,1.43e-34,3.91e-33,1.36e-24,2.46e-24,2.99e-24,1.62e-20,1.79e-16,2.57e-15,3.94e-15,1.56e-09,1.57e-08,4.32e-08,1.02e-07,2.84e-05,8.87e-05,0.00197,0.00655	0.204,0.221,0.0892,0.0183,0.0153,0.0122,0.00948,0.00984,0.00757,0.00544,0.0101,0.0138,0.00608,0.00423,0.00319,0.0105,0.00156,0.00541,0.00329,0.00177	7.01,5.5,8.52,15.5,16.2,5.7,6.64,4.72,15.6,6.02,6.08,2.3,14.4,15.4,4.25,13.2,14.3,1.89,3.3,3.72	A:G,A:G,A:G,A:G,A:G,A:G,A:G,A:G,A:G,A:G,A:G,A:G,A:G,A:G,A:G,A:G,A:G,A:G,A:G,A:G
AT1G56280	ATDI19	-	AT1G56280.1,AT1G56280.2	492.4522614,11.4731674	49	1_21073671,1_21073367,1_21073475,1_21074077,1_21073048,1_21073900,1_21073158,1_21073670,1_21073789,1_21073904,1_21073182,1_21073749,1_21074174,1_21073194,1_21073191,1_21073924,1_21073734,1_21073722,1_21073195,1_21074079,1_21073725,1_21073940,1_21073784,1_21073933,1_21073166,1_21073790,1_21073928,1_21074160,1_21074118,1_21074163,1_21073755,1_21073951,1_21073704,1_21074110,1_21073170,1_21073737,1_2…	4.11e-286,4.77e-146,3.68e-144,3.14e-132,6.03e-97,2.62e-93,9.12e-84,4.95e-77,5.98e-76,1.85e-71,3.09e-63,1.47e-53,7.22e-51,2.51e-45,2.85e-38,1.91e-37,3.22e-36,2.98e-26,9.94e-24,3.95e-23,3.71e-21,2.01e-20,7.97e-20,1.8e-17,3.02e-17,7.3e-17,1.12e-14,1.38e-14,7.91e-14,4.21e-11,5.03e-09,7.19e-09,6.85e-08,9.03e-08,2.63e-07,6.49e-07,6.79e-07,9.04e-07,1.33e-06,1.44e-06,3.86e-06,7.59e-05,7.85e-05,0.000118,0…	0.147,0.0653,0.19,0.049,0.118,0.0296,0.0442,0.0239,0.0231,0.018,0.462,0.0152,0.017,0.218,0.0211,0.00772,0.00807,0.00855,0.0102,0.00578,0.00516,0.00508,0.0077,0.00816,0.0101,0.00336,0.00301,0.0048,0.00454,0.00414,0.0025,0.00258,0.00231,0.00187,0.00411,0.00176,0.0027,0.00988,0.0018,0.00334,0.00125,0.00179,0.00151,0.00115,0.00181,0.0025,0.000932,0.00301,0.00173	8.22,4.37,3.44,5.24,7.1,6.14,6.86,3.89,4.95,18.9,3,5.41,5.37,2.14,4.44,7.23,6.21,3.59,5.12,4.45,4.36,4.31,4.62,3.68,5.24,5.21,15.3,4.14,4.44,3.56,3.36,4.29,4.3,14.2,4.14,3.63,2.97,2.53,13.6,2.36,4.76,3.18,3.2,3.61,2.36,4.22,4.17,2.47,12	T:C,T:C,T:C,T:C,T:C,T:C,T:C,T:C,T:C,T:C,T:C,T:C,T:C,T:C,T:C,T:C,T:C,T:C,T:C,T:C,T:C,T:C,T:C,T:C,T:C,T:C,T:C,T:C,T:C,T:C,T:C,T:C,T:C,T:C,T:C,T:C,T:C,T:C,T:C,T:C,T:C,T:C,T:C,T:C,T:C,T:C,T:C,T:C,T:C
AT3G13410	AT3G13410	-	AT3G13410.1	216.3499382	12	3_4362214,3_4363682,3_4362136,3_4362150,3_4362965,3_4362825,3_4362135,3_4362828,3_4363565,3_4362504,3_4362158,3_4363573	3.01e-284,1.91e-54,3.75e-31,9.65e-24,2.16e-14,7.8e-13,9.16e-13,2.79e-09,6.73e-05,0.000713,0.00269,0.00848	0.286,0.0587,0.0221,0.015,0.0152,0.00849,0.00733,0.067,0.00408,0.00242,0.00264,0.00262	6.29,3.78,17.7,17.1,3.64,14.4,14.6,1.21,13.8,13.5,3.16,2.6	T:C,T:C,T:C,T:C,T:C,T:C,T:C,T:C,T:C,T:C,T:C,T:C
AT4G32470	QCR7-1	-	AT4G32470.1,AT4G32470.2	502.4567754,0	17	4_15669517,4_15671030,4_15669641,4_15669693,4_15669480,4_15671020,4_15671035,4_15669668,4_15669533,4_15669507,4_15669665,4_15669584,4_15669595,4_15669594,4_15669508,4_15669697,4_15669586	1.16e-273,9.45e-154,7.4e-152,3.8e-98,4.97e-43,1.05e-42,3.21e-38,8.58e-38,6.79e-36,1.08e-26,3.77e-21,3.88e-08,6.81e-07,9.2e-07,1.68e-05,0.00081,0.00102	0.256,0.0767,0.0588,0.0253,0.0368,0.0177,0.0156,0.0104,0.0228,0.0201,0.00579,0.00328,0.00233,0.00326,0.00466,0.00118,0.00217	8.01,4.02,9.32,6.61,7.37,4.19,5.7,6.22,7.1,16.1,6.35,13.9,14.5,4.83,4.57,4.2,3.94	T:C,T:C,T:C,T:C,T:C,T:C,T:C,T:C,T:C,T:C,T:C,T:C,T:C,T:C,T:C,T:C,T:C
AT3G02090	MPPBETA	+	AT3G02090.1,AT3G02090.2	441.6412658,0.0698468	28	3_368538,3_368581,3_368539,3_368540,3_368619,3_368506,3_367152,3_368589,3_368327,3_368265,3_367365,3_367295,3_366174,3_368566,3_365650,3_365717,3_368536,3_368486,3_368326,3_365634,3_367060,3_368654,3_368311,3_368669,3_368516,3_367294,3_368594,3_366226	7.27e-268,1.46e-87,1.29e-71,6.19e-68,2.7e-48,5.14e-45,5.01e-42,8.56e-33,1.68e-32,1.81e-22,2.57e-22,6.6e-20,4.45e-14,5.76e-14,1.64e-11,2.42e-11,6.35e-11,6.95e-08,1.13e-06,1.35e-06,2.28e-06,2.92e-06,4.24e-06,6.98e-06,9.44e-06,9.92e-05,0.00267,0.00282	0.169,0.627,0.0486,0.0417,0.0579,0.0219,0.0413,0.025,0.0147,0.0131,0.183,0.221,0.00465,0.0115,0.00886,0.00843,0.00632,0.00301,0.00247,0.00745,0.00545,0.00491,0.0022,0.00481,0.00446,0.00297,0.00273,0.00133	6.86,3.57,4.86,6.52,6.68,5.93,2.79,6.03,5.52,3.26,2.44,2.13,5.8,5.91,5.55,4.12,5.5,15.3,15,3.55,2.52,13.6,13.8,13.5,3.81,4.39,3.93,4.25	A:G,A:G,A:G,A:G,A:G,A:G,A:G,A:G,A:G,A:G,A:G,A:G,A:G,A:G,A:G,A:G,A:G,A:G,A:G,A:G,A:G,A:G,A:G,A:G,A:G,A:G,A:G,A:G
AT1G18070	AT1G18070	-	AT1G18070.1,AT1G18070.2,AT1G18070.3	72.305814,21.9921898,0.0570636	13	1_6214379,1_6213978,1_6214257,1_6213878,1_6214256,1_6214727,1_6214424,1_6214076,1_6214215,1_6214406,1_6215682,1_6214650,1_6213987	8.52e-248,1.49e-193,1.28e-145,5.65e-29,1.97e-26,3.69e-16,6.31e-16,5.13e-08,1.98e-07,4.73e-05,5.35e-05,0.000503,0.000588	0.44,0.523,0.379,0.109,0.0534,0.0314,0.0235,0.0165,0.014,0.00818,0.00792,0.0082,0.00805	6.27,4.93,5.95,15.2,5.18,3.31,15,5.04,13.6,12.8,4.42,4.17,13.3	T:C,T:C,T:C,T:C,T:C,T:C,T:C,T:C,T:C,T:C,T:C,T:C,T:C
AT1G65930	CICDH	+	AT1G65930.1	555.807434	16	1_24541861,1_24541675,1_24541474,1_24541605,1_24541462,1_24541847,1_24541090,1_24541460,1_24541870,1_24541874,1_24541626,1_24541883,1_24541872,1_24540118,1_24541860,1_24541674	5.8e-246,1.05e-50,5.94e-32,8.59e-30,9.98e-27,2.17e-25,2.87e-19,7.56e-19,3.04e-11,1.59e-10,1.25e-07,2.62e-07,1.12e-06,0.000169,0.000313,0.00128	0.113,0.0122,0.00835,0.00744,0.00705,0.00846,0.00961,0.0243,0.00438,0.00418,0.00338,0.00269,0.00334,0.016,0.00132,0.000883	6.64,5.02,4.3,4.19,4.44,5.72,3.08,2.2,4.67,5.35,2.84,14.1,3.29,1.16,12.2,4.1	A:G,A:G,A:G,A:G,A:G,A:G,A:G,A:G,A:G,A:G,A:G,A:G,A:G,A:G,A:G,A:G
AT4G34720	VHA-C3	-	AT4G34720.1,AT4G34720.2	351.4394088,0.2153216	12	4_16568198,4_16568197,4_16568268,4_16568281,4_16569141,4_16568570,4_16568220,4_16568298,4_16568128,4_16568094,4_16568208,4_16568350	2.79e-245,1.7e-160,9.72e-43,3.76e-34,1.48e-12,7.05e-12,6.44e-11,5.45e-10,5.5e-09,3.62e-08,2.51e-05,7.54e-05	0.158,0.156,0.0486,0.0178,0.00708,0.00605,0.00604,0.00774,0.0103,0.00759,0.00291,0.00205	9.16,6.69,3.59,7.15,4.78,3.46,4.58,5.48,3.32,5.09,4.58,12.3	T:C,T:C,T:C,T:C,T:C,T:C,T:C,T:C,T:C,T:C,T:C,T:C
AT2G47690	AT2G47690	+	AT2G47690.1,AT2G47690.2,AT2G47690.3	288.8133504,3.0132402,0.5142474	8	2_19552022,2_19552013,2_19551462,2_19552012,2_19552072,2_19552115,2_19552058,2_19551992	5.17e-240,1.54e-48,1.7e-41,2.84e-32,2.86e-12,0.000223,0.00165,0.00363	0.249,0.0281,0.023,0.018,0.00703,0.00364,0.00276,0.00188	4.51,6.03,6.38,16.4,14.6,4.28,4.02,3.86	A:G,A:G,A:G,A:G,A:G,A:G,A:G,A:G
AT1G09590	RPL21A	+	AT1G09590.1	931.3124148	6	1_3107611,1_3107605,1_3107503,1_3107730,1_3107689,1_3107497	2.52e-236,3.44e-26,8.45e-18,5.94e-06,0.00012,0.000838	0.232,0.0159,0.0076,0.0171,0.00789,0.0013	6.24,5.74,4.34,14.5,4.38,12.2	A:G,A:G,A:G,A:G,A:G,A:G
AT5G15090	VDAC3	-	AT5G15090.1,AT5G15090.2	286.6592356,0.109335	17	5_4889648,5_4889488,5_4889672,5_4889693,5_4889875,5_4890611,5_4889486,5_4889487,5_4889493,5_4889415,5_4889498,5_4889603,5_4889491,5_4890058,5_4889909,5_4890166,5_4889499	4.48e-234,1.28e-41,4.47e-33,1.89e-19,1.25e-16,2.02e-14,7.33e-13,3.35e-12,3e-08,8.82e-08,3.79e-06,5.31e-06,1.69e-05,7.78e-05,0.000165,0.000425,0.000842	0.228,0.0896,0.0259,0.0157,0.017,0.0112,0.0301,0.0261,0.023,0.185,0.0119,0.00699,0.0112,0.00291,0.00252,0.00239,0.00744	5.9,17,5.12,4.45,2.98,2.86,15.8,15,5.12,13.4,14,4.69,13.9,13.3,13.2,13.1,12.7	T:C,T:C,T:C,T:C,T:C,T:C,T:C,T:C,T:C,T:C,T:C,T:C,T:C,T:C,T:C,T:C,T:C
AT2G25910	AT2G25910	-	AT2G25910.1,AT2G25910.2	96.3642858,15.8183624	28	2_11049357,2_11049823,2_11050781,2_11049750,2_11051036,2_11049828,2_11049581,2_11051132,2_11049427,2_11049413,2_11051971,2_11050148,2_11049751,2_11050175,2_11049388,2_11049755,2_11049798,2_11051377,2_11049723,2_11051388,2_11050697,2_11049822,2_11050160,2_11050911,2_11050928,2_11049715,2_11050391,2_11049402	6.86e-234,8.47e-83,1.4e-75,5.18e-61,1.38e-37,1.09e-30,5.34e-17,1.12e-14,2.42e-14,5.08e-13,1.38e-12,2.32e-12,4.07e-10,6.02e-10,1.22e-09,5.04e-09,5.21e-08,7.21e-08,2.15e-07,2.76e-07,1.88e-06,5.41e-06,6.19e-06,4.01e-05,8.61e-05,0.00173,0.00776,0.00776	0.487,0.0908,0.146,0.0676,0.0761,0.0302,0.0354,0.0228,0.026,0.0248,0.0249,0.0199,0.0119,0.0111,0.0159,0.0129,0.0098,0.00887,0.00878,0.00898,0.00837,0.00589,0.00592,0.00733,0.00697,0.00589,0.00418,0.00561	9.2,5.62,4.47,5.93,3.93,5,4.63,5.92,5.85,4.81,14.5,2.98,5.31,4.52,14.4,4.19,3.74,14.4,15,15,13.3,4.67,4.67,12.7,13.2,3.99,3.73,12.2	T:C,T:C,T:C,T:C,T:C,T:C,T:C,T:C,T:C,T:C,T:C,T:C,T:C,T:C,T:C,T:C,T:C,T:C,T:C,T:C,T:C,T:C,T:C,T:C,T:C,T:C,T:C,T:C
AT1G51650	AT1G51650	+	AT1G51650.1	948.462288	14	1_19153693,1_19153678,1_19153780,1_19152668,1_19153694,1_19153690,1_19153681,1_19152813,1_19152738,1_19152834,1_19153833,1_19153677,1_19153658,1_19153800	1.92e-227,1.09e-61,3.66e-47,2.43e-27,1.14e-24,4.55e-15,1.21e-10,2.69e-08,2.3e-07,2.77e-06,8.79e-06,1.25e-05,0.000187,0.00696	0.0654,0.0163,0.0223,0.0251,0.00675,0.00368,0.00247,0.00182,0.0016,0.00111,0.00596,0.00184,0.000991,0.00209	9.9,6.9,7.52,3.55,16,15.5,14.5,3.78,4.93,13.8,13.8,3.74,13.2,12.8	A:G,A:G,A:G,A:G,A:G,A:G,A:G,A:G,A:G,A:G,A:G,A:G,A:G,A:G
AT3G57290	EIF3E	-	AT3G57290.1	140.5557734	14	3_21196838,3_21196868,3_21196877,3_21196831,3_21197080,3_21197092,3_21196798,3_21196869,3_21196883,3_21196962,3_21198114,3_21196870,3_21198059,3_21197640	4.37e-224,1.08e-202,2.82e-88,2.89e-28,1.02e-11,2.17e-09,1.74e-08,2.45e-08,1.98e-07,3.26e-07,3.9e-07,0.000643,0.00137,0.00169	0.225,0.372,0.0808,0.408,0.025,0.0152,0.0109,0.00839,0.00637,0.00651,0.00872,0.00406,0.00433,0.00402	6.26,4.42,17.6,2.92,3.41,15.7,13.2,5.08,13.9,13.9,12.9,4.11,14.3,13.8	T:C,T:C,T:C,T:C,T:C,T:C,T:C,T:C,T:C,T:C,T:C,T:C,T:C,T:C
AT3G47833	SDH7A	+	AT3G47833.1	114.3730226	10	3_17649810,3_17649814,3_17649783,3_17649235,3_17648737,3_17649871,3_17649833,3_17649239,3_17649866,3_17649819	1.03e-223,1.78e-92,2.77e-11,9.67e-10,4.78e-07,6.81e-06,3.35e-05,0.000233,0.000827,0.00224	0.308,0.132,0.0107,0.0091,0.00786,0.00852,0.0069,0.00364,0.00626,0.00805	5.75,7.57,14.7,5.31,14.2,12.9,15,14.1,4.14,2.2	A:G,A:G,A:G,A:G,A:G,A:G,A:G,A:G,A:G,A:G
AT1G64230	UBC28	+	AT1G64230.1,AT1G64230.2,AT1G64230.5,AT1G64230.3,AT1G64230.4	445.0761092,2.615844,1.127368,0.2421688,0.067485	46	1_23834957,1_23835329,1_23835258,1_23834989,1_23833804,1_23833632,1_23833802,1_23834984,1_23833646,1_23834759,1_23834960,1_23835277,1_23833835,1_23834922,1_23833650,1_23834925,1_23833643,1_23834923,1_23833815,1_23834778,1_23835281,1_23834929,1_23833657,1_23835298,1_23834755,1_23834962,1_23835136,1_23833644,1_23833645,1_23834895,1_23835276,1_23835118,1_23833803,1_23834810,1_23834777,1_23835353,1_2…	2.22e-219,4.81e-156,8.83e-122,8.81e-54,2.46e-51,3.04e-50,1.71e-48,1.16e-40,2.07e-39,2.21e-34,3.47e-32,5.24e-31,2.58e-30,1.51e-27,2.2e-25,4.25e-23,1.79e-22,1.16e-21,3.07e-20,2.09e-17,2.33e-17,1.11e-16,8.7e-14,3.46e-11,4.26e-11,6.39e-11,1.38e-10,1.81e-10,6.03e-10,8.48e-09,2.62e-08,3.81e-08,1.4e-07,1.65e-06,6.4e-06,1.83e-05,2.01e-05,2.27e-05,2.31e-05,2.5e-05,5.9e-05,5.97e-05,0.000126,0.000254,0.0008…	0.0817,0.522,0.349,0.0308,0.0286,0.0724,0.0321,0.0145,0.0195,0.0152,0.0101,0.0315,0.0176,0.0117,0.0127,0.00731,0.012,0.00708,0.00576,0.0113,0.021,0.00857,0.00659,0.0164,0.00315,0.00409,0.00582,0.00617,0.0048,0.00352,0.0132,0.00462,0.00266,0.00243,0.0016,0.00719,0.00242,0.00536,0.00396,0.00439,0.00165,0.00751,0.00188,0.0018,0.00374,0.00511	6.18,8.93,2.15,4.92,7.87,3.35,4.79,6.36,15.6,4.01,17.1,16.9,5.56,6.86,5.2,6.56,6.5,5.51,15.7,6.27,15.7,5.23,4.93,5.55,15,5.54,4.66,13.9,15.6,3.89,3.52,3.82,5.04,4.82,14.3,12.7,3.72,13.7,3.78,14,4.48,2.67,3.59,4.25,4.14,2.23	A:G,A:G,A:G,A:G,A:G,A:G,A:G,A:G,A:G,A:G,A:G,A:G,A:G,A:G,A:G,A:G,A:G,A:G,A:G,A:G,A:G,A:G,A:G,A:G,A:G,A:G,A:G,A:G,A:G,A:G,A:G,A:G,A:G,A:G,A:G,A:G,A:G,A:G,A:G,A:G,A:G,A:G,A:G,A:G,A:G,A:G
AT4G11010	NDPK3	-	AT4G11010.1	453.8667314	28	4_6733033,4_6732992,4_6732834,4_6733298,4_6732887,4_6733264,4_6733228,4_6733232,4_6733194,4_6732862,4_6733227,4_6732812,4_6733867,4_6732811,4_6733013,4_6733070,4_6732831,4_6732820,4_6733437,4_6733470,4_6732876,4_6732781,4_6733086,4_6733233,4_6733179,4_6733252,4_6732802,4_6733805	8.06e-218,1.73e-135,1.02e-113,1.84e-57,1.26e-49,4.86e-38,3.57e-32,5.56e-28,9.56e-27,1.66e-26,9.38e-25,1.19e-24,3.63e-19,5.31e-18,4.25e-17,1.94e-14,5.54e-12,1.96e-08,3.62e-08,6.44e-08,2.7e-07,4.17e-06,6.78e-06,1.74e-05,0.00017,0.000191,0.00104,0.00206	0.0892,0.0526,0.0562,0.0307,0.234,0.104,0.0123,0.0103,0.0116,0.0103,0.25,0.00944,0.0073,0.00932,0.00568,0.00566,0.00486,0.00446,0.00393,0.00347,0.00431,0.00401,0.00252,0.00162,0.00201,0.0017,0.00196,0.00137	5.48,6.12,6.09,3.8,3.59,2.6,4.81,5.31,4.62,5.22,2.59,15,5.31,6.22,6.09,3.86,5.58,3.83,3.8,3.76,4,3.89,3.85,14,3.7,4.31,4.05,3.95	T:C,T:C,T:C,T:C,T:C,T:C,T:C,T:C,T:C,T:C,T:C,T:C,T:C,T:C,T:C,T:C,T:C,T:C,T:C,T:C,T:C,T:C,T:C,T:C,T:C,T:C,T:C,T:C
AT3G27240	CYC11	-	AT3G27240.1	330.9913052	27	3_10056052,3_10056032,3_10057096,3_10055997,3_10055983,3_10056838,3_10057082,3_10056143,3_10056571,3_10056194,3_10055985,3_10057268,3_10057903,3_10056178,3_10056572,3_10058337,3_10056131,3_10056021,3_10056069,3_10057146,3_10057803,3_10055919,3_10056022,3_10055984,3_10055936,3_10057131,3_10056051	5.12e-213,2.43e-61,2.81e-45,5.18e-43,7.49e-34,1.85e-19,3.63e-17,4.52e-16,9.56e-16,7.03e-11,7.95e-11,4.13e-09,7.33e-09,1.24e-08,3.38e-07,3.79e-07,8.56e-07,2.12e-06,9.43e-06,3.61e-05,8.52e-05,0.000303,0.000319,0.000578,0.00125,0.00177,0.00459	0.214,0.073,0.0233,0.0452,0.0395,0.00877,0.00794,0.00907,0.0125,0.00474,0.0123,0.00665,0.0518,0.00541,0.00327,0.0112,0.00358,0.0079,0.00461,0.00258,0.00267,0.0087,0.00375,0.0056,0.00717,0.00151,0.00309	7.9,8.03,4.7,7.41,15.2,15.4,5.18,5.12,4.37,4.62,15.5,5.31,1.58,4.35,4.85,2.1,15.6,4.8,14.1,4.46,13.3,4.3,13.2,4.17,12.7,4.01,3.85	T:C,T:C,T:C,T:C,T:C,T:C,T:C,T:C,T:C,T:C,T:C,T:C,T:C,T:C,T:C,T:C,T:C,T:C,T:C,T:C,T:C,T:C,T:C,T:C,T:C,T:C,T:C
AT5G50850	PDH2	+	AT5G50850.1	263.553727	21	5_20693021,5_20693033,5_20693034,5_20693035,5_20693044,5_20693043,5_20693198,5_20693199,5_20693037,5_20693045,5_20693197,5_20693036,5_20690679,5_20691282,5_20692928,5_20692740,5_20691831,5_20693221,5_20689513,5_20693046,5_20692951	9.58e-211,1.39e-78,7.75e-76,3.31e-41,5.71e-39,1.24e-28,1.46e-28,1.34e-27,8.67e-26,3.45e-25,1.44e-21,1.49e-12,2.39e-09,2.54e-08,5.02e-05,0.000355,5e-04,0.000647,0.00111,0.0028,0.00288	0.16,0.0489,0.0598,0.0281,0.0252,0.0201,0.0837,0.0873,0.0219,0.0165,0.0747,0.00944,0.00802,0.00826,0.00298,0.00319,0.00218,0.0197,0.00227,0.00265,0.00253	19.7,16.9,6.69,6.31,15.9,16.1,16.3,5.78,4.09,16.2,16.1,4.73,3.04,2.76,3.62,3.01,4.16,13.3,13,3.87,12.4	A:G,A:G,A:G,A:G,A:G,A:G,A:G,A:G,A:G,A:G,A:G,A:G,A:G,A:G,A:G,A:G,A:G,A:G,A:G,A:G,A:G
AT1G66240	ATX1	-	AT1G66240.1,AT1G66240.2,AT1G66240.3	587.8014192,133.157849,6.5022682	7	1_24686345,1_24686439,1_24686446,1_24686322,1_24686445,1_24686498,1_24686554	5.94e-204,4.27e-42,1.98e-15,1.17e-13,0.00259,0.00506,0.00767	0.189,0.0208,0.00535,0.00875,0.00247,0.00132,0.000955	5.46,5.26,5.01,14.3,1.96,2.72,2.96	T:C,T:C,T:C,T:C,T:C,T:C,T:C
AT5G35590	PAA1	-	AT5G35590.1	159.2758084	8	5_13765403,5_13765374,5_13767171,5_13765359,5_13765409,5_13765404,5_13765357,5_13767533	1.81e-203,2.28e-40,6.07e-15,2.54e-11,1.83e-08,1.83e-08,0.000812,0.00284	0.405,0.0537,0.0172,0.0184,0.0103,0.0105,0.0055,0.00191	5.96,15.6,3.66,13.9,15.5,15.2,12.8,12.7	T:C,T:C,T:C,T:C,T:C,T:C,T:C,T:C
AT5G27770	RPL22C	+	AT5G27770.1	514.760527	12	5_9837104,5_9836359,5_9837107,5_9836977,5_9836980,5_9836298,5_9837115,5_9837004,5_9836178,5_9837001,5_9836310,5_9836383	4.29e-201,5.28e-44,1.63e-27,4.01e-26,3.32e-23,3.14e-12,9.53e-09,1.72e-08,6.71e-07,8.54e-07,1.28e-06,0.000473	0.134,0.0203,0.0184,0.00728,0.0059,0.00547,0.00538,0.0074,0.00385,0.00327,0.00548,0.0015	7.39,3.62,4.92,5.72,15.8,4.23,13.7,2.27,4.87,3.25,2.33,4.12	A:G,A:G,A:G,A:G,A:G,A:G,A:G,A:G,A:G,A:G,A:G,A:G
AT4G00585	AT4G00585	-	AT4G00585.1	253.2224314	21	4_251124,4_251084,4_251088,4_251065,4_252291,4_251155,4_252176,4_251087,4_251089,4_251168,4_251086,4_251090,4_251182,4_251131,4_251111,4_251156,4_251085,4_251166,4_251245,4_252231,4_251167	4.82e-201,3.65e-99,6.42e-81,4.36e-65,5.97e-61,2.6e-45,5.17e-36,9.51e-34,5.1e-31,9.43e-26,4.99e-24,3.72e-16,3.81e-15,5.93e-12,6.7e-12,1.48e-09,1.5e-08,3.7e-07,3.75e-05,0.00327,0.00522	0.227,0.225,0.156,0.175,0.0631,0.616,0.0204,0.0674,0.715,0.0526,0.0493,0.0311,0.0147,0.0148,0.0144,0.00901,0.016,0.00566,0.00227,0.00183,0.00314	19.5,6.38,17.9,17.5,5.03,3.22,4.97,7.07,2.75,4.14,15.5,6.03,3.94,5.65,13.7,5.34,13.9,14.8,14.5,3.57,12.1	T:C,T:C,T:C,T:C,T:C,T:C,T:C,T:C,T:C,T:C,T:C,T:C,T:C,T:C,T:C,T:C,T:C,T:C,T:C,T:C,T:C
AT2G29960	CYP19-4	-	AT2G29960.3,AT2G29960.1,AT2G29960.2	130.6534886,0.4843486,0.286963	7	2_12769180,2_12769178,2_12769183,2_12769344,2_12769184,2_12769164,2_12769151	2.28e-200,6.36e-82,5.9e-30,1.19e-28,2.25e-27,1.86e-06,0.000167	0.444,0.165,0.0654,0.0335,0.051,0.0141,0.00872	6.19,7.37,6.88,4.08,15.6,4.79,12.9	T:C,T:C,T:C,T:C,T:C,T:C,T:C
AT2G42310	AT2G42310	+	AT2G42310.1	301.6471898	13	2_17625649,2_17625323,2_17625325,2_17625292,2_17625703,2_17625360,2_17625595,2_17625538,2_17625264,2_17625280,2_17625458,2_17625586,2_17625311	1.54e-199,8.99e-105,1.81e-53,2.37e-51,9.83e-43,2.44e-21,1.65e-15,7.23e-13,3.78e-11,6.13e-07,0.000175,0.0041,0.00466	0.359,0.0771,0.0274,0.0317,0.0598,0.00875,0.0114,0.00748,0.00828,0.00709,0.00245,0.00213,0.00252	5.69,4.29,6.19,5.75,7.45,6.43,6.02,4.85,14.3,3.61,3.56,3.89,2.73	A:G,A:G,A:G,A:G,A:G,A:G,A:G,A:G,A:G,A:G,A:G,A:G,A:G
AT3G23600	AT3G23600	+	AT3G23600.1,AT3G23600.2	519.0427712,1.9481562	28	3_8475775,3_8475521,3_8475664,3_8475668,3_8475061,3_8475651,3_8475601,3_8475395,3_8474633,3_8475652,3_8475566,3_8475749,3_8475663,3_8475672,3_8475030,3_8475610,3_8475570,3_8474534,3_8474634,3_8475018,3_8475729,3_8475425,3_8475621,3_8475596,3_8474997,3_8475598,3_8473903,3_8473856	1.79e-199,3.03e-145,1.45e-55,8.97e-48,8.39e-34,2.29e-24,5.18e-23,1.52e-17,1.04e-15,1.47e-15,4.21e-13,4.15e-11,4.62e-10,5.64e-10,2.73e-09,4.01e-07,1.72e-06,4.93e-06,5.26e-06,5.93e-06,7.14e-05,0.000346,0.000684,0.000908,0.00135,0.00159,0.00306,0.00384	0.3,0.0606,0.0461,0.0386,0.0101,0.0153,0.0105,0.00542,0.00376,0.0093,0.00511,0.0158,0.00904,0.00652,0.00247,0.00413,0.00216,0.00345,0.00163,0.00195,0.00621,0.00117,0.00236,0.00157,0.00414,0.00141,0.00153,0.00217	9.88,5.1,6.22,5.98,4.28,6.53,5.53,4.79,15.1,16.8,5.74,15.7,14.3,14.5,14.9,4.05,14.7,2.63,4.54,4.65,13.8,4.19,14.5,13.9,1.89,13.7,3.14,3.85	A:G,A:G,A:G,A:G,A:G,A:G,A:G,A:G,A:G,A:G,A:G,A:G,A:G,A:G,A:G,A:G,A:G,A:G,A:G,A:G,A:G,A:G,A:G,A:G,A:G,A:G,A:G,A:G
AT4G33250	TIF3K1	-	AT4G33250.1	161.951218	10	4_16039120,4_16039122,4_16039125,4_16039751,4_16040621,4_16039774,4_16039747,4_16039086,4_16039901,4_16040634	1.13e-198,2.97e-121,5.99e-31,1.25e-27,5.7e-11,1.07e-07,3.92e-06,6.4e-05,0.000213,0.00101	0.249,0.155,0.0361,0.0261,0.0185,0.00703,0.00539,0.00675,0.00519,0.00812	7.8,5.58,6.95,5.83,3.73,14.1,14.3,14.6,3.52,4.37	T:C,T:C,T:C,T:C,T:C,T:C,T:C,T:C,T:C,T:C
AT3G13580	RPL7D	+	AT3G13580.1,AT3G13580.2,AT3G13580.9,AT3G13580.3,AT3G13580.7,AT3G13580.8,AT3G13580.6,AT3G13580.5,AT3G13580.4	176.4707544,1.9437696,0.7194954,0.3837434,0.357017,0.1538198,0.0604328,0.0282582,0.0133334	18	3_4433891,3_4433893,3_4433870,3_4433855,3_4433847,3_4433972,3_4433895,3_4435166,3_4435192,3_4433858,3_4435205,3_4433897,3_4433874,3_4435202,3_4435157,3_4435140,3_4434678,3_4433894	2.64e-197,1.34e-174,2.13e-82,1.66e-78,4.26e-47,8.46e-32,3.44e-21,2.5e-16,3.81e-12,5.88e-11,1.24e-08,4.68e-07,7.97e-06,4.12e-05,0.000117,0.000155,0.00112,0.00536	0.191,0.163,0.0843,0.131,0.0521,0.0282,0.0277,0.0315,0.0247,0.0143,0.0236,0.00661,0.00695,0.0114,0.0102,0.0102,0.00635,0.00256	5.56,8.62,8.4,6.33,6.5,5.39,16.5,15.3,15,4.08,14.3,3.58,4.63,13.3,3.45,13,4.16,3.75	A:G,A:G,A:G,A:G,A:G,A:G,A:G,A:G,A:G,A:G,A:G,A:G,A:G,A:G,A:G,A:G,A:G,A:G
AT4G38510	VHA-B2	-	AT4G38510.2,AT4G38510.3,AT4G38510.4,AT4G38510.5,AT4G38510.1	70.4325124,65.4186256,34.2643312,4.3441432,0.280257	20	4_18011318,4_18011294,4_18012293,4_18011798,4_18011235,4_18012288,4_18011482,4_18011219,4_18011232,4_18013998,4_18012304,4_18014014,4_18012294,4_18012822,4_18012302,4_18013056,4_18011306,4_18014462,4_18014193,4_18013020	3.31e-197,3.53e-75,1.06e-68,5.11e-38,2.74e-21,9.15e-15,3.31e-14,5.22e-14,2.57e-13,2.55e-12,5.31e-12,3.22e-08,2.21e-06,3.52e-06,2.54e-05,5.79e-05,0.000408,0.000585,0.000867,0.00199	0.206,0.0703,0.191,0.0508,0.0179,0.0166,0.011,0.011,0.0164,0.0122,0.14,0.00985,0.00684,0.00828,0.0111,0.00738,0.00386,0.00381,0.00507,0.00371	5.39,5.2,2.48,5.3,4.92,15.8,15.3,15.7,4.04,5.62,2.65,3.45,14.6,3.16,2.64,3.7,3.42,13.7,2.87,3.22	T:C,T:C,T:C,T:C,T:C,T:C,T:C,T:C,T:C,T:C,T:C,T:C,T:C,T:C,T:C,T:C,T:C,T:C,T:C,T:C
AT5G53300	UBC10	-	AT5G53300.4,AT5G53300.2,AT5G53300.1,AT5G53300.3	789.7624642,15.38052,9.1980754,0.7664926	21	5_21632679,5_21633216,5_21633946,5_21633935,5_21633510,5_21632685,5_21632880,5_21633939,5_21632937,5_21633921,5_21633302,5_21633967,5_21632691,5_21632684,5_21633958,5_21633215,5_21634001,5_21633249,5_21633549,5_21633445,5_21633506	8.1e-196,1.03e-44,3.94e-25,1.16e-23,5e-16,3.66e-15,6.79e-12,2.37e-10,5.64e-09,1.6e-08,1.44e-07,2.32e-06,7.27e-06,7.14e-05,0.000296,0.000383,0.000596,0.00125,0.00177,0.00208,0.00587	0.258,0.0126,0.00703,0.00571,0.004,0.0147,0.00325,0.00283,0.002,0.00202,0.00167,0.00229,0.00535,0.00461,0.00161,0.00229,0.139,0.00112,0.000947,0.000942,0.00211	20.3,4.27,5.16,6.55,5.02,14.6,5.61,4.55,5.23,5.17,4.16,3.97,12.8,14.1,3.07,2.64,4.02,3.36,4.01,4.15,1.47	T:C,T:C,T:C,T:C,T:C,T:C,T:C,T:C,T:C,T:C,T:C,T:C,T:C,T:C,T:C,T:C,T:C,T:C,T:C,T:C,T:C
AT1G07770	RPS15AA	-	AT1G07770.3,AT1G07770.2,AT1G07770.1	448.0510926,263.2865974,69.3124226	27	1_2408763,1_2408714,1_2408457,1_2408450,1_2408451,1_2408490,1_2408764,1_2408938,1_2408686,1_2408766,1_2408393,1_2409486,1_2409067,1_2408963,1_2408435,1_2408461,1_2409059,1_2408744,1_2408287,1_2408724,1_2409065,1_2408454,1_2409060,1_2409043,1_2409481,1_2408464,1_2408436	6.21e-194,9.94e-59,3.24e-45,4.68e-33,4.32e-31,4.57e-30,5.07e-30,7.44e-30,3.68e-28,2.3e-27,2.68e-20,1.16e-18,3.07e-15,6.59e-15,8.39e-15,7.7e-07,2.69e-06,8.73e-05,0.000359,4e-04,0.000447,0.000573,0.000641,0.000768,0.00266,0.00698,0.0088	0.0735,0.017,0.0152,0.0121,0.0131,0.00807,0.00765,0.125,0.0114,0.286,0.0142,0.00944,0.00579,0.0044,0.0101,0.00311,0.00233,0.00166,0.007,0.00123,0.00198,0.00164,0.00216,0.00184,0.00521,0.0011,0.00147	4.69,5.61,7.44,6.04,4.76,16.2,16.2,2.64,5.03,2.67,6.41,6.21,5.93,4.99,3.89,5.02,4.76,3.6,4.23,4.22,4.23,4.2,2.88,3.42,1.59,3.75,2.96	T:C,T:C,T:C,T:C,T:C,T:C,T:C,T:C,T:C,T:C,T:C,T:C,T:C,T:C,T:C,T:C,T:C,T:C,T:C,T:C,T:C,T:C,T:C,T:C,T:C,T:C,T:C
AT3G52730	AT3G52730	-	AT3G52730.1,AT3G52730.2	380.4667262,0.5761938	7	3_19543080,3_19543736,3_19542971,3_19544206,3_19543185,3_19543714,3_19544139	1.71e-190,2.47e-31,9.32e-11,3.6e-08,5.86e-08,0.000984,0.00124	0.203,0.0336,0.0415,0.00928,0.00295,0.00176,0.0023	6.48,3.8,15.7,2.53,13.3,4.04,2.85	T:C,T:C,T:C,T:C,T:C,T:C,T:C
AT1G27000	AT1G27000	+	AT1G27000.1	164.5015646	9	1_9376229,1_9376313,1_9376312,1_9374547,1_9374961,1_9376410,1_9374949,1_9374576,1_9374913	5.68e-190,2.88e-58,9.92e-22,3.82e-09,1.49e-05,2.91e-05,0.000207,0.00071,0.00409	0.366,0.118,0.0344,0.0047,0.00732,0.00732,0.00571,0.00271,0.00377	4.98,6.35,15,5.26,4.7,12.7,3.52,3.38,2.76	A:G,A:G,A:G,A:G,A:G,A:G,A:G,A:G,A:G
AT5G47030	AT5G47030	+	AT5G47030.1	520.9344952	27	5_19091940,5_19092209,5_19092053,5_19091973,5_19092075,5_19091878,5_19092208,5_19091926,5_19092076,5_19091814,5_19092106,5_19092072,5_19092210,5_19092039,5_19092074,5_19092034,5_19091997,5_19092077,5_19091931,5_19092073,5_19090511,5_19091844,5_19092132,5_19092069,5_19091916,5_19091938,5_19091753	1.57e-187,1.79e-121,5.93e-74,1.02e-52,4.93e-51,7.44e-50,1.44e-41,2.08e-39,6.23e-39,1.84e-36,2.02e-34,1.84e-31,4.61e-17,3.3e-09,1.59e-07,8.56e-07,7.44e-06,1.08e-05,1.83e-05,0.000228,0.000346,0.000693,0.000706,0.00124,0.00247,0.005,0.00533	0.112,0.225,0.0638,0.0288,0.0476,0.0278,0.0789,0.0329,0.0429,0.0159,0.0249,0.03,0.0304,0.0109,0.00677,0.0049,0.00381,0.00549,0.00393,0.00468,0.00125,0.00185,0.00365,0.00392,0.00197,0.00265,0.00147	6.62,9.02,4.77,7.69,16.9,5.16,7.35,3.99,16.7,6.2,6.11,6.94,14.8,4.34,14.6,4.87,3.85,14.3,3.34,13.4,4.2,14.2,13.7,4.06,3.88,3,3.08	A:G,A:G,A:G,A:G,A:G,A:G,A:G,A:G,A:G,A:G,A:G,A:G,A:G,A:G,A:G,A:G,A:G,A:G,A:G,A:G,A:G,A:G,A:G,A:G,A:G,A:G,A:G
AT1G16890	UBC36	-	AT1G16890.2,AT1G16890.1,AT1G16890.3	180.6073752,0.5812984,0.2393866	3	1_5776442,1_5776443,1_5777433	4.55e-186,9.4e-45,2.53e-09	0.676,0.114,0.00608	7.3,16.8,5.27	T:C,T:C,T:C
AT4G38920	VHA-C3	+	AT4G38920.1,AT4G38920.2	544.59144,0.807441	21	4_18149004,4_18149001,4_18148741,4_18149000,4_18148857,4_18149021,4_18148858,4_18148266,4_18148330,4_18148856,4_18149003,4_18149023,4_18148357,4_18149002,4_18148740,4_18148793,4_18148781,4_18148795,4_18148179,4_18149022,4_18148382	7.91e-184,2.36e-119,9.42e-52,7.32e-39,1.07e-30,1.79e-28,8.98e-25,9.3e-17,6.67e-16,1.45e-15,7.53e-15,6.13e-13,4.58e-10,5.03e-07,3.35e-06,1.06e-05,0.000134,0.000247,0.000292,0.00186,0.00943	0.133,0.0649,0.0549,0.02,0.011,0.0169,0.0184,0.00407,0.0192,0.00557,0.00866,0.00691,0.00349,0.00396,0.00199,0.00162,0.00141,0.00105,0.00147,0.0035,0.000887	7.32,17.3,4.25,7.21,6.89,6.76,3.55,4.03,2.85,5.94,5.9,14,3.09,13.2,3.42,4.64,4.39,13.7,2.85,3.1,2.95	A:G,A:G,A:G,A:G,A:G,A:G,A:G,A:G,A:G,A:G,A:G,A:G,A:G,A:G,A:G,A:G,A:G,A:G,A:G,A:G,A:G
AT4G39200	RPS25E	+	AT4G39200.1,AT4G39200.2	808.0542348,6.8513968	27	4_18257855,4_18257627,4_18258389,4_18257624,4_18257867,4_18257849,4_18258369,4_18258457,4_18257843,4_18258390,4_18257852,4_18257861,4_18257570,4_18257834,4_18258398,4_18257578,4_18257870,4_18257853,4_18258385,4_18257573,4_18257854,4_18257842,4_18257848,4_18258365,4_18257424,4_18258354,4_18257889	1.87e-182,2.37e-180,6.11e-133,1.18e-52,1.04e-44,1.55e-42,9.14e-32,7.36e-27,4.5e-21,1.34e-20,1.9e-18,2.28e-14,3.13e-13,1.53e-12,4.24e-12,2.34e-09,5.54e-07,9.44e-06,9.93e-06,9.03e-05,0.000128,0.000216,0.00028,0.00133,0.00575,0.00788,0.00793	0.0446,0.0413,0.0429,0.0145,0.00875,0.0102,0.00739,0.00923,0.0075,0.00463,0.00976,0.00293,0.00615,0.00477,0.00411,0.0135,0.00129,0.00146,0.00126,0.00245,0.00177,0.000807,0.00119,0.00137,0.00966,0.000524,0.000652	6.03,4.53,4.08,5.48,4.54,4.62,4.22,5.24,3.58,4.9,2.39,3.48,3.55,3.52,3.45,1.26,3.57,2.69,3.78,2.33,2.31,13.4,2.41,2.72,2.64,3.76,2.38	A:G,A:G,A:G,A:G,A:G,A:G,A:G,A:G,A:G,A:G,A:G,A:G,A:G,A:G,A:G,A:G,A:G,A:G,A:G,A:G,A:G,A:G,A:G,A:G,A:G,A:G,A:G
AT4G34450	AT4G34450	+	AT4G34450.1	108.227007	23	4_16476846,4_16476814,4_16476675,4_16476778,4_16476700,4_16475411,4_16476681,4_16475163,4_16474268,4_16476371,4_16476825,4_16475374,4_16476787,4_16475390,4_16473047,4_16476739,4_16475505,4_16474203,4_16474952,4_16473688,4_16476692,4_16475433,4_16476797	3.15e-179,5.82e-172,5.1e-148,7.55e-44,1.27e-39,1.38e-25,2.66e-15,4.32e-14,4.2e-11,5.07e-08,7.81e-08,2.08e-07,2.63e-07,7.98e-07,3.69e-06,3.84e-06,5.07e-06,1.58e-05,0.000447,0.00066,0.00126,0.00319,0.00924	0.254,0.212,0.11,0.0435,0.0303,0.0276,0.0111,0.019,0.0249,0.00854,0.00923,0.00826,0.00781,0.0062,0.0138,0.00544,0.0109,0.0112,0.00617,0.00722,0.00207,0.0055,0.00467	8.03,6.2,6.06,5.19,6.26,5.71,4.51,3.61,3.21,3.73,5.03,4.97,4.93,13.9,3.92,3.88,3.32,3.78,3.48,4.17,12.3,3.15,3.8	A:G,A:G,A:G,A:G,A:G,A:G,A:G,A:G,A:G,A:G,A:G,A:G,A:G,A:G,A:G,A:G,A:G,A:G,A:G,A:G,A:G,A:G,A:G
AT5G47570	AT5G47570	-	AT5G47570.1	445.5889598	7	5_19292839,5_19292834,5_19294406,5_19292878,5_19294195,5_19292837,5_19294378	3.52e-179,1.39e-57,1.9e-26,6.27e-11,9.3e-09,2.25e-07,3.88e-05	0.156,0.059,0.00876,0.0049,0.004,0.00529,0.00286	6.37,4.56,5.19,14,5.18,4.94,3.21	T:C,T:C,T:C,T:C,T:C,T:C,T:C
AT3G53020	RPL24B	-	AT3G53020.1	1003.8403408	8	3_19660777,3_19660786,3_19660699,3_19661334,3_19660830,3_19661465,3_19660835,3_19660693	4.52e-179,1.64e-48,6.79e-33,6.24e-10,8.18e-10,1.7e-06,0.00126,0.0021	0.169,0.0269,0.0309,0.0107,0.00633,0.0017,0.00127,0.00318	5.43,5.35,4.16,2.96,3.01,4.86,4,3.21	T:C,T:C,T:C,T:C,T:C,T:C,T:C,T:C
AT3G28715	VHA-D2	+	AT3G28715.1,AT3G28715.2	104.5332558,0.1626068	7	3_10780435,3_10779962,3_10780390,3_10780441,3_10780383,3_10779341,3_10780393	2.27e-177,9.19e-36,1.37e-30,1.28e-10,8.67e-09,7.67e-08,0.000852	0.314,0.0633,0.0523,0.0176,0.018,0.017,0.00604	8.65,4.72,16.2,14,14.6,3.42,12.4	A:G,A:G,A:G,A:G,A:G,A:G,A:G
AT3G01280	VDAC1	+	AT3G01280.1	372.4778716	24	3_87628,3_87625,3_87654,3_87605,3_87492,3_87560,3_87765,3_87581,3_87631,3_87630,3_87640,3_87487,3_87549,3_87614,3_87021,3_86605,3_87036,3_86625,3_87083,3_86909,3_87748,3_86707,3_85799,3_87338	3.63e-177,2.89e-56,4.08e-49,2.31e-39,3.12e-30,1.63e-15,3.67e-12,8.31e-09,8.54e-09,1.02e-08,5.41e-08,6.84e-07,3.03e-06,3.78e-06,3.2e-05,0.000164,0.000259,0.000341,0.00041,0.000514,0.000622,0.000882,0.00595,0.00893	0.106,0.0312,0.0338,0.0183,0.0143,0.00877,0.026,0.0046,0.006,0.00657,0.00563,0.00412,0.00428,0.00421,0.00201,0.0025,0.00172,0.00157,0.00209,0.0013,0.00654,0.00143,0.00115,0.00138	6.9,16.8,7.55,17.4,5.94,5.97,5.59,5.08,4.32,5.2,4.15,4.03,3.45,3.9,4.5,2.59,4.25,4.21,4.15,12.2,12.5,4.14,13.4,2.97	A:G,A:G,A:G,A:G,A:G,A:G,A:G,A:G,A:G,A:G,A:G,A:G,A:G,A:G,A:G,A:G,A:G,A:G,A:G,A:G,A:G,A:G,A:G,A:G
AT1G30230	AT1G30230	+	AT1G30230.1,AT1G30230.2	549.179445,0.7488766	20	1_10640526,1_10640037,1_10639979,1_10640152,1_10640279,1_10639835,1_10640209,1_10640525,1_10639266,1_10640025,1_10639526,1_10640043,1_10640036,1_10639813,1_10640196,1_10639762,1_10640040,1_10639984,1_10640406,1_10640256	1.09e-175,1.43e-72,1.59e-71,5.3e-67,1.17e-45,2.16e-26,3.7e-24,2.05e-22,8.33e-15,1.13e-13,2.69e-12,1.88e-11,1.52e-10,6.92e-10,2.45e-09,1.24e-08,3.62e-06,3.02e-05,0.000781,0.00335	0.0793,0.0294,0.0207,0.0267,0.0728,0.00977,0.0105,0.00929,0.0201,0.00433,0.00701,0.0044,0.00379,0.0057,0.00352,0.00649,0.00171,0.00185,0.0015,0.00148	5.95,4.58,5.89,5.62,2.23,6.7,3.66,5.54,2.98,4.96,2.09,3.86,5.48,3.66,3.99,2.28,14.5,3.73,4.13,2.78	A:G,A:G,A:G,A:G,A:G,A:G,A:G,A:G,A:G,A:G,A:G,A:G,A:G,A:G,A:G,A:G,A:G,A:G,A:G,A:G
AT5G67500	VDAC2	+	AT5G67500.3,AT5G67500.1,AT5G67500.2	207.5386854,34.878171,0	10	5_26937078,5_26937071,5_26936256,5_26937126,5_26936601,5_26936906,5_26936948,5_26937196,5_26937042,5_26936924	8.43e-175,2.5e-20,1.16e-08,6.59e-08,1.7e-07,2.51e-07,3.54e-05,8.86e-05,0.000268,0.00348	0.178,0.0162,0.00466,0.00879,0.0141,0.0176,0.00486,0.00657,0.0051,0.00195	4.93,5.35,5.14,15.3,2.2,2.32,4.49,12.5,2.77,12.7	A:G,A:G,A:G,A:G,A:G,A:G,A:G,A:G,A:G,A:G
AT4G29735	AT4G29735	-	AT4G29735.1,AT4G29735.2	107.4867474,0	13	4_14562907,4_14562922,4_14562921,4_14562926,4_14564076,4_14563137,4_14563157,4_14564281,4_14563155,4_14564153,4_14562979,4_14564280,4_14562986	8.68e-175,1.14e-158,1.02e-69,2.58e-46,4.19e-43,2.66e-33,8.75e-07,1.59e-05,2.86e-05,4.48e-05,0.000373,9e-04,0.00201	0.356,0.306,0.131,0.0929,0.0377,0.0342,0.00493,0.00901,0.00396,0.0057,0.00394,0.00553,0.00331	7.26,18.5,8.09,17,6.39,6.01,13.5,4.53,14.1,13.7,13.2,12.2,12.9	T:C,T:C,T:C,T:C,T:C,T:C,T:C,T:C,T:C,T:C,T:C,T:C,T:C
AT1G22300	GRF10	-	AT1G22300.1,AT1G22300.2,AT1G22300.3	287.2184296,114.0964458,2.5573688	14	1_7878975,1_7879274,1_7878976,1_7879085,1_7879677,1_7878999,1_7881075,1_7880560,1_7879147,1_7879908,1_7880380,1_7880563,1_7880150,1_7880384	7.13e-174,4.02e-34,1.63e-29,1.56e-26,1.58e-19,2.35e-16,1.7e-12,4.59e-08,4.34e-06,1.18e-05,0.000415,0.000521,0.00179,0.00624	0.233,0.0319,0.038,0.0175,0.0145,0.0167,0.00753,0.00397,0.0054,0.00367,0.00203,0.00141,0.00174,0.0025	7.99,5.51,6.89,15.3,4.37,6,3.47,3.02,3.91,4.55,4.21,4.22,3.99,2.59	T:C,T:C,T:C,T:C,T:C,T:C,T:C,T:C,T:C,T:C,T:C,T:C,T:C,T:C
AT5G20290	RPS8A	-	AT5G20290.1	1627.0878724	20	5_6851714,5_6851966,5_6851720,5_6851661,5_6851884,5_6851717,5_6851994,5_6852403,5_6852180,5_6852186,5_6851768,5_6851752,5_6853029,5_6852183,5_6851893,5_6851708,5_6852851,5_6852249,5_6852014,5_6851758	8.51e-172,5.46e-89,1.06e-57,9.79e-48,9.5e-38,4.38e-37,1.76e-17,1.16e-11,1.04e-10,3.46e-09,3.15e-08,1.88e-07,2.53e-07,7.45e-07,0.000153,0.000689,0.000866,0.000941,0.00555,0.00587	0.0548,0.0272,0.013,0.0163,0.0867,0.00805,0.00413,0.00315,0.00168,0.00179,0.00145,0.00212,0.00846,0.00129,0.00113,0.00163,0.00116,0.000659,0.00146,0.0011	6.38,3,5.9,5.34,2.79,6.23,3.27,3.07,4.32,2.82,14.2,3.67,15.3,3.26,2.87,2.53,13.8,2.48,1.36,2.43	T:C,T:C,T:C,T:C,T:C,T:C,T:C,T:C,T:C,T:C,T:C,T:C,T:C,T:C,T:C,T:C,T:C,T:C,T:C,T:C
AT1G51070	BHLH115	+	AT1G51070.1,AT1G51070.2	244.0521724,0.1121676	15	1_18929403,1_18929289,1_18929442,1_18928910,1_18929328,1_18929551,1_18929136,1_18929350,1_18928748,1_18928734,1_18929318,1_18929344,1_18928110,1_18929023,1_18929137	5.71e-171,4.66e-42,2.74e-41,1.82e-37,1.36e-19,9.88e-16,1.47e-13,1.54e-11,2.99e-08,1.03e-07,4.06e-07,4.92e-07,7.78e-07,0.00109,0.00146	0.224,0.0569,0.047,0.0226,0.0148,0.0277,0.00947,0.012,0.00672,0.00496,0.00614,0.00589,0.00272,0.00302,0.00427	5.32,4.22,6.38,16.4,15.8,15.3,5.83,4.25,3.08,3.19,4.95,14.5,15,2.94,2.65	A:G,A:G,A:G,A:G,A:G,A:G,A:G,A:G,A:G,A:G,A:G,A:G,A:G,A:G,A:G
AT3G51840	ACX4	-	AT3G51840.1	171.3513306	9	3_19225512,3_19225513,3_19226549,3_19227917,3_19225685,3_19225506,3_19225483,3_19228149,3_19226929	2.17e-170,2.01e-17,1.83e-15,7.81e-12,3.65e-10,7.91e-10,1.54e-07,5.97e-07,0.00104	0.372,0.0371,0.0261,0.0125,0.0079,0.0263,0.0161,0.00969,0.00483	9.73,15.1,2.58,15.5,5.39,14.6,14.9,4.11,2.64	T:C,T:C,T:C,T:C,T:C,T:C,T:C,T:C,T:C
AT2G43970	LARP6B	-	AT2G43970.1,AT2G43970.2	279.9047838,0.1197142	63	2_18205472,2_18205475,2_18206060,2_18205838,2_18205418,2_18205827,2_18205452,2_18205468,2_18205966,2_18208001,2_18208187,2_18206618,2_18205823,2_18205845,2_18205453,2_18205585,2_18205820,2_18206775,2_18205758,2_18205797,2_18205367,2_18207947,2_18207989,2_18206061,2_18205460,2_18206574,2_18207344,2_18205535,2_18207096,2_18208190,2_18207125,2_18208132,2_18206041,2_18208128,2_18208091,2_18207100,2_1…	7.49e-167,2.06e-140,4.13e-107,9.54e-62,5.18e-46,8.33e-42,9.34e-42,1.38e-38,3.13e-38,8.52e-35,2.23e-34,6.98e-31,1.18e-30,2.04e-28,9.63e-27,3.19e-26,7.68e-21,2.01e-18,3.15e-18,8.64e-18,2.24e-17,9.12e-17,1.76e-16,4.47e-15,1.27e-14,1.63e-14,4.67e-14,1.02e-13,1.27e-13,4.87e-12,6.66e-11,1.29e-09,4.73e-09,9.79e-09,3.73e-08,4.52e-08,1.59e-07,2.64e-07,3.34e-07,4.64e-07,8.98e-07,3.02e-06,8.04e-06,1.26e-05,…	0.15,0.1,0.078,0.0374,0.0553,0.0197,0.0531,0.0321,0.0244,0.068,0.172,0.0229,0.0186,0.0194,0.0285,0.01,0.0189,0.0145,0.0086,0.00942,0.0447,0.0441,0.0216,0.00736,0.0129,0.0547,0.022,0.00611,0.0313,0.106,0.00818,0.0161,0.00394,0.0136,0.0152,0.00951,0.00531,0.00888,0.0269,0.00726,0.00458,0.00351,0.00565,0.0059,0.00559,0.0036,0.00382,0.0136,0.0016,0.00781,0.00373,0.00191,0.00377,0.00288,0.00288,0.0018…	7.92,19,4.36,4.75,6.49,16.5,5.49,5.7,5.25,3.62,7.16,4.33,6.92,4.41,6.68,6.65,3.08,4.75,5.39,4.7,6.33,3.06,6.04,15.1,5.84,2.65,2.79,5.76,2.84,13.8,14.9,13.8,5.1,13.6,14.3,3.77,4.11,3.64,2.08,4.05,3.07,3.9,2.57,2.64,2.67,4.58,3.61,1.98,14.3,1.45,2.82,13.1,3.33,2.59,13.9,3.99,3.9,4.18,2.7,3.32,2.2,3.78,3.01	T:C,T:C,T:C,T:C,T:C,T:C,T:C,T:C,T:C,T:C,T:C,T:C,T:C,T:C,T:C,T:C,T:C,T:C,T:C,T:C,T:C,T:C,T:C,T:C,T:C,T:C,T:C,T:C,T:C,T:C,T:C,T:C,T:C,T:C,T:C,T:C,T:C,T:C,T:C,T:C,T:C,T:C,T:C,T:C,T:C,T:C,T:C,T:C,T:C,T:C,T:C,T:C,T:C,T:C,T:C,T:C,T:C,T:C,T:C,T:C,T:C,T:C,T:C
AT3G07480	AT3G07480	+	AT3G07480.1	426.7546832	12	3_2389457,3_2389259,3_2389447,3_2389485,3_2389045,3_2389158,3_2389392,3_2389360,3_2389411,3_2389408,3_2389144,3_2389325	1.51e-165,2.08e-57,1.24e-33,5.84e-15,2.92e-14,1.59e-12,1.64e-10,6.55e-10,2.56e-08,0.000944,0.00113,0.0042	0.108,0.0227,0.0279,0.00917,0.0202,0.00557,0.00723,0.0049,0.00361,0.00401,0.00166,0.00232	5.7,4.69,4.75,5.9,3.29,3.45,3.62,4.47,14.1,2.64,2.9,2.37	A:G,A:G,A:G,A:G,A:G,A:G,A:G,A:G,A:G,A:G,A:G,A:G
AT2G33040	ATPC	-	AT2G33040.1	640.0951116	24	2_14019096,2_14019060,2_14019142,2_14018758,2_14019037,2_14019045,2_14018749,2_14018895,2_14018978,2_14020254,2_14019806,2_14019018,2_14019374,2_14019329,2_14020029,2_14019097,2_14018918,2_14020358,2_14018924,2_14020247,2_14018846,2_14019322,2_14019013,2_14019031	2.11e-165,4.79e-130,7.28e-42,8.73e-27,4.34e-19,8.81e-19,2.31e-16,1.69e-14,1.94e-14,3.58e-11,2.21e-09,3.65e-09,1.67e-08,4.16e-08,3.99e-07,4.63e-07,1.59e-06,1.65e-05,5.88e-05,0.000406,0.00101,0.00101,0.00171,0.00896	0.0556,0.0474,0.0143,0.0759,0.00527,0.00677,0.0444,0.00827,0.00464,0.0176,0.00431,0.00314,0.00579,0.00684,0.00366,0.00175,0.00399,0.00179,0.00254,0.00174,0.00266,0.00246,0.00141,0.00102	5.38,4.98,5.43,6.75,15,6.33,15.9,14.3,15.4,1.49,3.38,4.36,3.72,3.52,3.32,14.4,3.98,3.76,4.44,4.21,13.2,2.68,3.22,3.67	T:C,T:C,T:C,T:C,T:C,T:C,T:C,T:C,T:C,T:C,T:C,T:C,T:C,T:C,T:C,T:C,T:C,T:C,T:C,T:C,T:C,T:C,T:C,T:C
AT1G48600	NMT2	+	AT1G48600.1,AT1G48600.2	276.969908,1.714129	18	1_17969062,1_17969024,1_17967923,1_17969235,1_17968526,1_17969308,1_17968068,1_17968257,1_17968491,1_17968593,1_17968863,1_17968478,1_17967689,1_17968199,1_17969149,1_17968462,1_17969091,1_17967688	2.48e-165,2.3e-57,5.68e-27,5.39e-26,1.13e-23,2.73e-21,1.3e-19,1.49e-17,6.98e-09,4.19e-08,8.98e-07,7.89e-06,2.37e-05,0.000746,0.00086,0.00169,0.00308,0.00352	0.19,0.0473,0.0265,0.0904,0.0253,0.41,0.0113,0.0111,0.00883,0.0152,0.00524,0.0113,0.00487,0.00203,0.00495,0.00402,0.00405,0.00328	7.49,6.83,3.27,15,4.2,4.52,4.82,2.97,3.56,5.25,14.6,2.92,4.57,3.32,14.1,2.4,3.94,3.87	A:G,A:G,A:G,A:G,A:G,A:G,A:G,A:G,A:G,A:G,A:G,A:G,A:G,A:G,A:G,A:G,A:G,A:G
AT3G09500	RPL35A	+	AT3G09500.1	1753.1721	24	3_2917846,3_2917852,3_2917849,3_2917618,3_2917682,3_2917664,3_2917835,3_2917676,3_2917572,3_2917034,3_2917635,3_2917626,3_2917889,3_2917848,3_2917039,3_2917888,3_2917691,3_2917665,3_2917008,3_2917632,3_2917593,3_2917922,3_2917942,3_2917567	2.36e-164,2.01e-68,2.13e-58,6.97e-38,1.85e-35,3.17e-31,8.58e-31,5.14e-29,4.14e-23,1.06e-15,1.07e-15,9.36e-15,5.84e-13,4.9e-11,2.19e-10,2.28e-10,9.13e-06,1.95e-05,6.33e-05,0.000238,0.000264,0.000952,0.00116,0.00243	0.0705,0.0279,0.0238,0.00762,0.0117,0.00648,0.0753,0.00646,0.0752,0.00746,0.0591,0.00303,0.00633,0.00362,0.00478,0.004,0.0014,0.00116,0.0215,0.00161,0.00169,0.00243,0.00257,0.00109	5.31,6.53,6.29,4.26,3.33,4.81,3.43,5.41,2.62,5.96,2.44,3.81,4.84,15.5,4.53,15.3,4.66,3.77,3.19,2.06,1.74,13.1,13.2,1.9	A:G,A:G,A:G,A:G,A:G,A:G,A:G,A:G,A:G,A:G,A:G,A:G,A:G,A:G,A:G,A:G,A:G,A:G,A:G,A:G,A:G,A:G,A:G,A:G
AT1G16700	AT1G16700	+	AT1G16700.1	187.9850034	13	1_5711827,1_5711825,1_5711826,1_5711831,1_5711819,1_5710838,1_5711722,1_5711633,1_5711079,1_5711274,1_5711059,1_5711621,1_5711095	5.54e-164,5.19e-85,6.22e-44,1.76e-15,2.16e-11,8.33e-09,1.87e-08,1.6e-06,7.17e-06,1.18e-05,0.00472,0.00529,0.0065	0.424,0.211,0.114,0.0394,0.0458,0.00504,0.0109,0.00586,0.00501,0.00758,0.00317,0.00293,0.00282	9.78,17.9,16.9,15.8,4.71,14.2,13.3,14.3,13.6,3.38,3.14,3.81,3.75	A:G,A:G,A:G,A:G,A:G,A:G,A:G,A:G,A:G,A:G,A:G,A:G,A:G
AT1G59900	E1 ALPHA	+	AT1G59900.1,AT1G59900.2	93.8193784,34.9457634	6	1_22053703,1_22053667,1_22053663,1_22053340,1_22053702,1_22053134	5.94e-162,9.37e-64,7.7e-55,4.17e-11,6.16e-06,0.000123	0.395,0.099,0.107,0.013,0.0126,0.00767	5.02,7,6.24,5.52,14.1,3.61	A:G,A:G,A:G,A:G,A:G,A:G
AT5G57300	COQ5	-	AT5G57300.1,AT5G57300.3,AT5G57300.2,AT5G57300.4	35.7869512,10.4756662,3.7427638,2.933965	5	5_23208712,5_23208751,5_23208766,5_23208705,5_23208713	8.84e-160,2.68e-158,4e-85,1.03e-19,0.001	0.553,0.594,0.348,0.0682,0.0137	6.73,5.12,6.21,14.6,13.6	T:C,T:C,T:C,T:C,T:C
AT2G21870	MGP1	-	AT2G21870.1,AT2G21870.2	725.4232638,0.0364906	23	2_9320622,2_9320620,2_9320466,2_9320281,2_9320621,2_9320417,2_9320411,2_9320443,2_9321366,2_9320670,2_9320380,2_9320456,2_9321600,2_9320891,2_9321648,2_9320315,2_9320277,2_9321711,2_9320686,2_9320383,2_9320340,2_9321601,2_9320728	2.29e-158,4.93e-155,1.04e-133,9.29e-95,6.9e-56,4.96e-27,1.86e-22,3.06e-20,2.8e-19,4.03e-18,6.74e-18,1.49e-11,6.48e-10,3.66e-08,1.04e-07,7.62e-07,2.67e-05,7.51e-05,0.000109,0.00131,0.00473,0.00644,0.00729	0.0936,0.0708,0.0543,0.108,0.0195,0.0135,0.011,0.01,0.00645,0.00671,0.0101,0.00409,0.00258,0.00378,0.00198,0.00526,0.00577,0.0013,0.0022,0.00219,0.0024,0.00106,0.00128	4.78,5.71,8.13,18.8,6.24,6.73,5.56,15.1,4,4.15,5.28,15.7,4.5,3.9,3.41,13.7,14.4,3.23,3.01,3.31,3.77,2.67,2.42	T:C,T:C,T:C,T:C,T:C,T:C,T:C,T:C,T:C,T:C,T:C,T:C,T:C,T:C,T:C,T:C,T:C,T:C,T:C,T:C,T:C,T:C,T:C
AT5G47210	AT5G47210	-	AT5G47210.1,AT5G47210.2,AT5G47210.3	570.7366214,0.3483194,0.0537752	9	5_19169218,5_19169193,5_19169510,5_19169987,5_19169223,5_19169288,5_19169890,5_19169300,5_19169273	1.08e-157,2.21e-15,4.12e-14,8.99e-08,3.66e-05,9.44e-05,0.000225,0.000257,0.00112	0.135,0.0129,0.00647,0.00417,0.0043,0.00382,0.00273,0.00243,0.00201	5.45,14.9,2.9,2.35,3.65,3.14,2.92,4.25,12.8	T:C,T:C,T:C,T:C,T:C,T:C,T:C,T:C,T:C
AT5G40510	AT5G40510	+	AT5G40510.1,AT5G40510.2	84.3017504,1.5794152	8	5_16230825,5_16230828,5_16230865,5_16230876,5_16230805,5_16230052,5_16230941,5_16230757	1.2e-156,1.17e-144,1.25e-69,5.59e-14,5.44e-10,3.79e-09,6.3e-07,0.00135	0.379,0.278,0.177,0.0352,0.0198,0.0277,0.0276,0.00716	6.55,9.3,17.4,14.8,5.38,3.87,15,4.03	A:G,A:G,A:G,A:G,A:G,A:G,A:G,A:G
AT1G78900	VHA-A	+	AT1G78900.1,AT1G78900.2	343.2919696,101.6875912	14	1_29664566,1_29663941,1_29664635,1_29664126,1_29664575,1_29663917,1_29664172,1_29664520,1_29664634,1_29664312,1_29664567,1_29664600,1_29664168,1_29663912	2.2e-156,2.77e-61,1.9e-60,1.4e-43,2.97e-19,6.56e-15,1.84e-11,4.2e-11,6.74e-10,6.67e-09,2.04e-05,0.000375,0.000566,0.00511	0.169,0.0286,0.034,0.0256,0.012,0.00806,0.00828,0.00784,0.00568,0.00336,0.0029,0.00308,0.00194,0.00164	5.41,5.68,6.9,4.06,3.98,4.19,2.92,14.8,5.37,14.5,4.56,12.8,3.35,3.85	A:G,A:G,A:G,A:G,A:G,A:G,A:G,A:G,A:G,A:G,A:G,A:G,A:G,A:G
AT3G04600	AT3G04600	+	AT3G04600.1,AT3G04600.3,AT3G04600.2	56.8315812,7.2199974,0	4	3_1245775,3_1243659,3_1245542,3_1245811	3.5e-154,1.75e-14,5.75e-10,9.13e-06	0.486,0.0727,0.113,0.0224	6.01,2.93,3.62,12.8	A:G,A:G,A:G,A:G
AT1G15120	AT1G15120	+	AT1G15120.1,AT1G15120.2	234.0894544,0.0916278	18	1_5203757,1_5203738,1_5203693,1_5203508,1_5203891,1_5204011,1_5203703,1_5203888,1_5203496,1_5203509,1_5203769,1_5203510,1_5202919,1_5203893,1_5204099,1_5203723,1_5203930,1_5203741	3.16e-153,2.05e-60,1.87e-55,5.52e-37,5.26e-26,6.68e-24,4.17e-21,5.15e-16,1.32e-14,3.79e-12,3.53e-09,1.72e-07,7.58e-06,8.24e-06,0.000186,0.00203,0.00453,0.0065	0.0611,0.0312,0.0369,0.019,0.0173,0.029,0.00892,0.00643,0.0068,0.00419,0.00471,0.00268,0.00304,0.00267,0.0317,0.00166,0.00173,0.0012	6.18,6.02,5.61,4.38,5,16.2,5.6,6.01,5.92,15.3,4.38,13.3,12.9,14.1,13.4,3.13,3.85,3.76	A:G,A:G,A:G,A:G,A:G,A:G,A:G,A:G,A:G,A:G,A:G,A:G,A:G,A:G,A:G,A:G,A:G,A:G
AT5G54310	AGD5	-	AT5G54310.1	75.3100818	6	5_22057256,5_22057258,5_22058607,5_22057837,5_22057843,5_22057739	2.77e-152,1.64e-36,2.45e-20,5.26e-14,5.84e-10,9.63e-05	0.688,0.159,0.0576,0.0407,0.0341,0.0114	5.77,15.9,4.23,3.78,2.83,3.59	T:C,T:C,T:C,T:C,T:C,T:C
AT3G59920	GDI2	+	AT3G59920.1	221.4081298	16	3_22138039,3_22138250,3_22137719,3_22136012,3_22138007,3_22136885,3_22137895,3_22137317,3_22138005,3_22138222,3_22136063,3_22136292,3_22138217,3_22138218,3_22136937,3_22137830	1.5e-151,5.08e-35,7.69e-22,2.15e-07,1.05e-06,4.01e-06,7.33e-06,8.82e-06,9.48e-06,6.09e-05,0.000304,0.00108,0.00119,0.00161,0.00351,0.0038	0.188,0.0512,0.0172,0.00667,0.00624,0.00683,0.00442,0.00574,0.00852,0.00526,0.00284,0.00434,0.00356,0.00487,0.00187,0.0022	5.75,7.07,4.1,3.38,14.8,3.9,4.65,2.27,15.4,14.2,12.7,4.08,14,12,3.85,3.85	A:G,A:G,A:G,A:G,A:G,A:G,A:G,A:G,A:G,A:G,A:G,A:G,A:G,A:G,A:G,A:G
AT4G30010	AT4G30010	+	AT4G30010.1	583.8239566	13	4_14674036,4_14673935,4_14672959,4_14673040,4_14673199,4_14673185,4_14673977,4_14673946,4_14673959,4_14673914,4_14673200,4_14673255,4_14673913	1.55e-150,1.21e-49,1.3e-46,6.43e-21,6.26e-15,3.37e-12,1.63e-11,1.82e-07,3.98e-07,1.29e-05,7.98e-05,0.000383,0.000876	0.209,0.0248,0.0236,0.00525,0.00371,0.00275,0.00747,0.00452,0.00423,0.00251,0.00115,0.00239,0.00211	19.3,6.65,5.56,6.35,15.1,14.6,4.2,4.15,4.98,4.5,13.9,3.56,2.95	A:G,A:G,A:G,A:G,A:G,A:G,A:G,A:G,A:G,A:G,A:G,A:G,A:G
AT1G60730	AT1G60730	-	AT1G60730.1,AT1G60730.2,AT1G60730.3	127.5617096,0.473197,0.0818704	11	1_22358202,1_22358229,1_22359032,1_22358648,1_22358214,1_22358260,1_22360038,1_22358150,1_22358273,1_22358636,1_22358844	8.06e-150,2.61e-37,1.53e-32,1.75e-10,6.48e-09,1.87e-07,7.62e-05,0.000134,0.000179,0.000214,0.000433	0.512,0.1,0.0394,0.0135,0.0224,0.0186,0.00406,0.022,0.00881,0.00549,0.00729	6.13,7.19,5.43,14,14.2,4,13.7,12.7,13.4,12.1,4.12	T:C,T:C,T:C,T:C,T:C,T:C,T:C,T:C,T:C,T:C,T:C
AT4G17390	RPL15B	-	AT4G17390.1	1132.7003152	9	4_9714414,4_9714517,4_9714513,4_9714433,4_9714444,4_9714770,4_9714927,4_9714516,4_9714633	2.91e-149,4.57e-142,3.12e-18,8.77e-13,1.7e-09,1.51e-07,1.74e-05,4.63e-05,0.0012	0.0931,0.0386,0.00432,0.00541,0.00419,0.00201,0.00121,0.00158,0.000538	5.94,5.44,5.25,5.7,5.38,4.44,3.29,3.64,12.7	T:C,T:C,T:C,T:C,T:C,T:C,T:C,T:C,T:C
AT4G22220	ISU1	-	AT4G22220.1	201.7319344	5	4_11759398,4_11759397,4_11759367,4_11759409,4_11759390	4.31e-148,9.91e-41,1.02e-07,0.000326,0.00175	0.248,0.0556,0.0123,0.00461,0.00573	7.89,15.7,15.9,14.1,4.04	T:C,T:C,T:C,T:C,T:C
AT5G17920	MS1	+	AT5G17920.2,AT5G17920.1	884.8801486,461.6225404	7	5_5939344,5_5939043,5_5938627,5_5939047,5_5939085,5_5939071,5_5939044	6.62e-147,3.62e-12,1.55e-10,7.64e-10,2.99e-07,1.16e-06,5.99e-06	0.0711,0.00243,0.00877,0.0618,0.138,0.00132,0.00216	6.08,4.26,1.38,2.16,1.19,4.02,2.23	A:G,A:G,A:G,A:G,A:G,A:G,A:G
AT2G43460	RPL38B	-	AT2G43460.1	1294.2163098	12	2_18046779,2_18046284,2_18046273,2_18046858,2_18046743,2_18046773,2_18046278,2_18046131,2_18046088,2_18046112,2_18046759,2_18046775	4.44e-146,1.37e-59,3.64e-43,1.39e-27,5.58e-22,8.97e-11,7.76e-08,6.33e-06,1.46e-05,3.48e-05,0.000163,0.000291	0.0486,0.0223,0.0129,0.0301,0.00561,0.00292,0.00227,0.00849,0.0114,0.00818,0.00139,0.00212	4.03,4.67,6.4,2.55,5.48,4.54,5.02,12.9,13.9,13.4,3.5,2.64	T:C,T:C,T:C,T:C,T:C,T:C,T:C,T:C,T:C,T:C,T:C,T:C
AT2G20420	AT2G20420	+	AT2G20420.1	239.576553	12	2_8807890,2_8807784,2_8807744,2_8807720,2_8807783,2_8807833,2_8806268,2_8807802,2_8807779,2_8806058,2_8807258,2_8806304	6.43e-146,5.36e-45,1.66e-43,4.89e-13,2.28e-06,9.89e-06,1.77e-05,0.000533,0.000587,0.00357,0.0063,0.00953	0.147,0.0283,0.0256,0.00886,0.00367,0.00506,0.00437,0.002,0.00205,0.00293,0.00364,0.0032	7.71,6.49,7.38,4.8,15.1,4.56,3.04,14.2,12.8,2.36,3.04,2.91	A:G,A:G,A:G,A:G,A:G,A:G,A:G,A:G,A:G,A:G,A:G,A:G
AT2G37340	RS2Z33	-	AT2G37340.1,AT2G37340.3,AT2G37340.6,AT2G37340.2,AT2G37340.5,AT2G37340.4	114.0836466,4.9951308,1.8418026,0.3723232,0.3350224,0	18	2_15670558,2_15670623,2_15670512,2_15670614,2_15671098,2_15671054,2_15670870,2_15670948,2_15670415,2_15672303,2_15670601,2_15670882,2_15672235,2_15670858,2_15670629,2_15671580,2_15671033,2_15670894	5.36e-145,4.55e-101,1.19e-97,2.63e-63,1.33e-27,1.11e-17,1.27e-10,5.86e-10,1.25e-08,1.09e-06,1.27e-06,1.56e-06,6.3e-06,6.74e-06,1.18e-05,8.45e-05,9.2e-05,0.00113	0.338,0.301,0.33,0.0981,0.072,0.0337,0.0128,0.019,0.0221,0.0163,0.00853,0.00625,0.00998,0.00783,0.00921,0.00704,0.013,0.00476	3.47,2.75,3.46,3.83,3.23,5.21,4.09,5.42,5.14,13.8,4.82,14.9,4.64,3.42,3.34,13.1,2.68,4.08	T:C,T:C,T:C,T:C,T:C,T:C,T:C,T:C,T:C,T:C,T:C,T:C,T:C,T:C,T:C,T:C,T:C,T:C
AT1G14400	UBC1	-	AT1G14400.1,AT1G14400.2	96.8523734,82.989702	6	1_4927311,1_4927295,1_4927397,1_4927278,1_4927260,1_4928143	1.45e-144,2.3e-09,1.29e-05,0.000178,0.000183,0.00891	0.238,0.0114,0.00409,0.00532,0.00755,0.00229	5.58,15.8,13.9,14.3,4.31,2.96	T:C,T:C,T:C,T:C,T:C,T:C
AT1G63940	MDAR6	+	AT1G63940.1,AT1G63940.2,AT1G63940.3,AT1G63940.4	166.9243362,50.5090544,1.8898154,1.4534426	11	1_23733632,1_23731614,1_23731377,1_23733564,1_23733612,1_23730317,1_23733438,1_23733538,1_23731888,1_23730504,1_23732088	5.61e-144,1.64e-14,5.12e-10,1.86e-07,6.89e-06,0.000295,0.00215,0.00222,0.00277,0.00329,0.00727	0.213,0.0122,0.014,0.0069,0.00829,0.00364,0.00241,0.00419,0.00214,0.00447,0.00235	9.27,2.79,3.2,14.6,13.4,4.22,3.95,3.28,3.8,2.28,3	A:G,A:G,A:G,A:G,A:G,A:G,A:G,A:G,A:G,A:G,A:G
AT2G42500	PP2A4	-	AT2G42500.1,AT2G42500.2,AT2G42500.4,AT2G42500.3,AT2G42500.5	93.0382102,0.1900768,0.6077134,0.4731078,0.0638976	7	2_17698031,2_17698341,2_17697941,2_17697913,2_17701211,2_17697999,2_17698506	1.34e-143,4.3e-45,1.39e-10,5.8e-10,0.000663,0.00165,0.00171	0.3,0.0841,0.031,0.0322,0.0117,0.00694,0.00502	5.89,4.02,14.7,14.8,1.98,13.1,12.6	T:C,T:C,T:C,T:C,T:C,T:C,T:C
AT1G77710	AT1G77710	+	AT1G77710.1	238.7567308	13	1_29206969,1_29207894,1_29206970,1_29206973,1_29206948,1_29207884,1_29207845,1_29206942,1_29206968,1_29206766,1_29206765,1_29207437,1_29207844	4.29e-141,2.34e-97,2.86e-85,3.79e-72,1.81e-38,1.54e-31,1.67e-21,1.38e-11,5.46e-10,1.04e-08,7e-06,0.000162,0.000369	0.0992,0.119,0.0598,0.0658,0.0237,0.0268,0.0134,0.00556,0.00606,0.00689,0.00588,0.00269,0.00251	9.25,7.69,6.83,7.33,6.21,16.1,15.6,15.8,5.37,14.6,4.75,13.3,13.6	A:G,A:G,A:G,A:G,A:G,A:G,A:G,A:G,A:G,A:G,A:G,A:G,A:G
AT1G57720	AT1G57720	+	AT1G57720.1,AT1G57720.2	179.5627012,111.085203	32	1_21379873,1_21380173,1_21377834,1_21380187,1_21379835,1_21380117,1_21379967,1_21380152,1_21379885,1_21379870,1_21380046,1_21380035,1_21379871,1_21378973,1_21378179,1_21380177,1_21379918,1_21379828,1_21379960,1_21378541,1_21380027,1_21379379,1_21379428,1_21378428,1_21379165,1_21379209,1_21377873,1_21378971,1_21378182,1_21380110,1_21379924,1_21379054	6.01e-141,2.74e-76,6.71e-54,2.32e-35,1.08e-34,1.92e-26,1.16e-15,2.45e-13,1.33e-12,3.05e-12,4.65e-11,6.2e-11,1.35e-10,4.99e-10,2.68e-07,8.96e-07,9.81e-07,3.04e-06,3.84e-06,1.81e-05,1.89e-05,8.29e-05,0.000143,0.000233,0.00035,0.00126,0.00129,0.0019,0.00257,0.00309,0.00368,0.00649	0.0888,0.0772,0.0511,0.034,0.112,0.0193,0.00703,0.0107,0.133,0.00719,0.00497,0.00592,0.00896,0.00624,0.00396,0.00521,0.00365,0.00543,0.0036,0.00307,0.00278,0.00332,0.00438,0.00202,0.00422,0.00477,0.00286,0.00287,0.002,0.00317,0.0017,0.00302	4.95,4.29,4.26,7.1,2.35,4.32,5.96,4.34,1.47,4.74,13.5,4.58,3.15,5.38,4.93,13.6,4.83,3.25,4.76,3.77,4.55,3.61,2.86,14.3,3.09,2.28,4.02,3.21,3.89,2.48,3.85,2.66	A:G,A:G,A:G,A:G,A:G,A:G,A:G,A:G,A:G,A:G,A:G,A:G,A:G,A:G,A:G,A:G,A:G,A:G,A:G,A:G,A:G,A:G,A:G,A:G,A:G,A:G,A:G,A:G,A:G,A:G,A:G,A:G
AT5G40770	PHB3	-	AT5G40770.1	98.9283696	13	5_16315460,5_16315431,5_16315427,5_16315452,5_16315430,5_16315428,5_16315675,5_16315429,5_16315751,5_16316608,5_16315386,5_16315711,5_16315923	4.51e-140,1.8e-96,2.08e-79,4.63e-36,2.4e-12,1.13e-10,8.64e-09,2.47e-08,8.48e-06,0.00017,0.000778,0.00311,0.00431	0.27,0.169,0.24,0.0579,0.0282,0.0409,0.0101,0.0163,0.00615,0.00963,0.0096,0.00643,0.00359	4.96,8.61,6.84,7.09,5.45,4,5.16,14.3,14.4,3.09,4.07,2.48,13.6	T:C,T:C,T:C,T:C,T:C,T:C,T:C,T:C,T:C,T:C,T:C,T:C,T:C
AT5G58710	CYP20-1	+	AT5G58710.1	263.3694782	17	5_23719508,5_23719545,5_23719020,5_23719146,5_23719437,5_23718481,5_23718881,5_23719572,5_23717893,5_23719390,5_23719121,5_23717888,5_23719169,5_23719569,5_23718707,5_23719142,5_23718898	5.41e-140,1.63e-28,4.42e-20,5.25e-19,1.68e-17,1.25e-13,3.88e-12,4.74e-12,4.34e-11,1.29e-06,1.34e-05,0.000155,0.000633,0.0033,0.00482,0.0066,0.00968	0.189,0.0441,0.0189,0.0103,0.0155,0.0109,0.00637,0.028,0.0109,0.00575,0.00315,0.00719,0.00249,0.00537,0.00175,0.00188,0.00244	6.32,5.8,4.81,6.17,6.04,4.32,5.57,14.5,5.41,3.92,4.54,3.61,4.06,12.8,12.6,3.55,2.3	A:G,A:G,A:G,A:G,A:G,A:G,A:G,A:G,A:G,A:G,A:G,A:G,A:G,A:G,A:G,A:G,A:G
AT1G49410	TOM6	-	AT1G49410.1	172.3378988	10	1_18285746,1_18285703,1_18286751,1_18285702,1_18286739,1_18285656,1_18285733,1_18285729,1_18285672,1_18285744	3.95e-139,7.06e-53,3.54e-12,3.61e-11,2.74e-06,2.73e-05,0.000195,0.00114,0.00135,0.00281	0.112,0.0355,0.00872,0.00741,0.00369,0.00585,0.00412,0.00261,0.00423,0.00401	5.66,16.9,5.55,14.1,14,4.49,3.35,13.1,3.23,2.45	T:C,T:C,T:C,T:C,T:C,T:C,T:C,T:C,T:C,T:C
AT5G34850	PAP26	-	AT5G34850.1	184.3968296	44	5_13108430,5_13108739,5_13109825,5_13109478,5_13108743,5_13109472,5_13109294,5_13110969,5_13108540,5_13110890,5_13109535,5_13110318,5_13108768,5_13109315,5_13108628,5_13109910,5_13109594,5_13109587,5_13110362,5_13109586,5_13108717,5_13111139,5_13110746,5_13108542,5_13108443,5_13108715,5_13109846,5_13109862,5_13109479,5_13108679,5_13108422,5_13109613,5_13111080,5_13111245,5_13109307,5_13108719,5_1…	4.08e-139,5.54e-114,2.13e-65,3.35e-60,9.55e-32,2.88e-28,5.03e-26,3.77e-24,2.51e-22,1.26e-20,1.62e-18,1.49e-17,1.88e-16,1.14e-14,3.29e-14,4.22e-14,1.75e-13,7.35e-12,1.04e-09,4.99e-09,5.25e-09,6.29e-09,1.98e-08,1.59e-06,4.75e-06,8.4e-06,8.96e-06,1.01e-05,0.000102,0.000158,0.000164,0.000384,0.000389,0.000429,0.000479,0.000512,0.000996,0.00103,0.00138,0.00306,0.0032,0.00417,0.00581,0.00754	0.115,0.0732,0.0415,0.0585,0.0164,0.0195,0.0197,0.0338,0.0143,0.0173,0.0136,0.016,0.00853,0.0147,0.00874,0.00535,0.00795,0.0113,0.00639,0.00716,0.00413,0.00798,0.00838,0.00584,0.0043,0.00273,0.00319,0.00386,0.00238,0.00264,0.00318,0.00274,0.00658,0.00774,0.00224,0.00238,0.00382,0.00512,0.0024,0.00282,0.00274,0.00252,0.00358,0.00367	6.81,5.12,3.72,4.64,5.05,5.3,5.17,3.75,15.6,6.32,5.25,3.1,14.8,3.61,14.8,15,5.73,3.09,5.3,4.32,15.3,4.31,3.79,3.98,13.3,13.2,3.81,3.03,14.5,15,12.9,4.27,2.5,13.3,4.17,4.15,2.49,4.06,12.5,3.13,3.89,3.07,3.02,3.98	T:C,T:C,T:C,T:C,T:C,T:C,T:C,T:C,T:C,T:C,T:C,T:C,T:C,T:C,T:C,T:C,T:C,T:C,T:C,T:C,T:C,T:C,T:C,T:C,T:C,T:C,T:C,T:C,T:C,T:C,T:C,T:C,T:C,T:C,T:C,T:C,T:C,T:C,T:C,T:C,T:C,T:C,T:C,T:C
AT5G08690	AT5G08690	+	AT5G08690.1	561.1077906	25	5_2828327,5_2828494,5_2828425,5_2828536,5_2828335,5_2827655,5_2827982,5_2828493,5_2828116,5_2827581,5_2828306,5_2826741,5_2827413,5_2827930,5_2827740,5_2828115,5_2828492,5_2827610,5_2828244,5_2826138,5_2828482,5_2827933,5_2827150,5_2828145,5_2828417	4.23e-139,5.25e-65,8.78e-63,5.26e-62,5.99e-50,1.9e-39,9.7e-36,2.71e-28,1.64e-21,6.12e-19,6.76e-17,7.69e-16,3.13e-15,8.23e-12,2.37e-11,9.14e-10,7.55e-09,1.09e-07,1.79e-07,2.98e-07,2.2e-06,2.78e-06,1.16e-05,0.000143,0.000768	0.0781,0.0651,0.04,0.0761,0.0283,0.0314,0.0255,0.0248,0.0105,0.00583,0.00751,0.0112,0.0043,0.00792,0.00452,0.00769,0.00747,0.00242,0.00302,0.0188,0.00631,0.00388,0.00144,0.00304,0.00284	5.72,6.44,7.93,6.36,5.66,2.85,3.13,15.1,5.49,3.23,6.07,3.11,3.29,3.05,4.7,3.4,14.7,3.18,5.02,1.7,3.95,3.34,4.64,2.66,4.12	A:G,A:G,A:G,A:G,A:G,A:G,A:G,A:G,A:G,A:G,A:G,A:G,A:G,A:G,A:G,A:G,A:G,A:G,A:G,A:G,A:G,A:G,A:G,A:G,A:G
AT5G39950	TRX2	-	AT5G39950.1	438.9400772	6	5_15990902,5_15990872,5_15991007,5_15990816,5_15990858,5_15991549	4.69e-139,1.64e-13,2.57e-10,2.31e-06,0.000387,0.00182	0.193,0.0177,0.00574,0.0119,0.00666,0.00124	5.58,16,4.04,13.4,4.21,13.9	T:C,T:C,T:C,T:C,T:C,T:C
AT1G08480	SDH6	+	AT1G08480.1	229.8976474	15	1_2685269,1_2685313,1_2684898,1_2685380,1_2685621,1_2685416,1_2685326,1_2684887,1_2685570,1_2684403,1_2684905,1_2685459,1_2685410,1_2685361,1_2685688	6.68e-137,1.02e-42,9.4e-18,1.82e-15,1.56e-14,6.86e-12,3.27e-09,1.2e-08,1.7e-07,3.25e-05,0.000115,0.00013,0.000199,0.000823,0.00166	0.163,0.0343,0.014,0.0165,0.247,0.0122,0.00678,0.00674,0.0499,0.00418,0.00283,0.0064,0.00433,0.00424,0.222	5.76,4.95,3.87,5.03,5.85,5.58,14,3.51,4.13,3.68,4.35,12.4,13.3,4.23,11.9	A:G,A:G,A:G,A:G,A:G,A:G,A:G,A:G,A:G,A:G,A:G,A:G,A:G,A:G,A:G
AT2G02510	AT2G02510	+	AT2G02510.1	250.2401326	12	2_674549,2_674529,2_673535,2_674525,2_673498,2_674531,2_673396,2_673523,2_673499,2_673380,2_673409,2_673531	1.88e-133,3.72e-97,1.24e-93,7e-22,1.85e-21,4.12e-15,6.28e-10,1.68e-07,3.25e-06,0.000195,0.000519,0.000697	0.219,0.0786,0.0455,0.0201,0.0104,0.0143,0.00949,0.00416,0.00273,0.00306,0.00239,0.00166	6.59,7.61,7.51,15.5,6.37,5.01,5.38,13.2,13.5,13.4,12.5,11.9	A:G,A:G,A:G,A:G,A:G,A:G,A:G,A:G,A:G,A:G,A:G,A:G
AT3G09200	RPP0B	-	AT3G09200.1,AT3G09200.2	905.8378476,0.3544974	32	3_2823365,3_2824992,3_2824995,3_2824978,3_2823430,3_2823406,3_2823808,3_2823434,3_2824608,3_2823886,3_2823986,3_2823974,3_2823792,3_2824628,3_2823881,3_2823481,3_2824798,3_2823770,3_2823683,3_2823952,3_2824818,3_2823914,3_2823922,3_2823428,3_2823714,3_2824896,3_2825005,3_2823418,3_2823325,3_2823407,3_2823460,3_2824825	2.2e-133,1.45e-54,6.62e-45,3.21e-43,1.71e-40,2.32e-27,1.91e-20,2.5e-18,8.72e-16,1.03e-15,3.86e-14,2.15e-11,6.7e-09,8.81e-09,3.86e-08,9.43e-08,1.19e-07,4.33e-07,5.21e-05,0.000155,0.000159,0.000406,0.000502,0.000969,0.00109,0.00112,0.00128,0.00146,0.00169,0.00216,0.00692,0.00835	0.0566,0.0237,0.0206,0.0244,0.0157,0.00927,0.00627,0.0083,0.00395,0.0158,0.00682,0.0203,0.0093,0.014,0.0249,0.0493,0.0049,0.00257,0.00423,0.00647,0.0013,0.000976,0.00201,0.00305,0.00121,0.00172,0.00145,0.00162,0.00189,0.00126,0.00083,0.00198	6.76,5.49,5.52,3.01,4,5.79,3.15,2.97,3.13,2.24,2.12,2.65,2.18,1.89,1.59,1.14,1.57,2.56,1.54,1.37,2.84,13.7,2.25,1.98,2.53,2.87,13.8,2.88,3.99,3.94,3.74,1.85	T:C,T:C,T:C,T:C,T:C,T:C,T:C,T:C,T:C,T:C,T:C,T:C,T:C,T:C,T:C,T:C,T:C,T:C,T:C,T:C,T:C,T:C,T:C,T:C,T:C,T:C,T:C,T:C,T:C,T:C,T:C,T:C
AT1G67350	AT1G67350	+	AT1G67350.1,AT1G67350.2	302.9499914,37.5001974	10	1_25236051,1_25236606,1_25236082,1_25235941,1_25236609,1_25236085,1_25235895,1_25235898,1_25235952,1_25235967	4.68e-133,1.86e-64,1.89e-63,6.42e-63,5.32e-50,4.57e-24,2.07e-12,3.32e-07,8.22e-05,0.000905	0.045,0.032,0.0228,0.0379,0.0333,0.0089,0.00678,0.00312,0.00249,0.00212	6.73,6.4,7.93,4.27,7.75,6.56,4.75,13.4,3.58,3.32	A:G,A:G,A:G,A:G,A:G,A:G,A:G,A:G,A:G,A:G
AT5G42390	AT5G42390	+	AT5G42390.1	34.4135898	2	5_16952633,5_16952433	7.81e-133,6.75e-18	0.492,0.0674	5.01,6.14	A:G,A:G
AT3G52090	NRPB11	-	AT3G52090.1,AT3G52090.2	145.6892808,0.06477	2	3_19318034,3_19317884	3.49e-131,0.00708	0.262,0.0628	9.22,3.04	T:C,T:C
AT1G73230	AT1G73230	-	AT1G73230.1	419.8006706	17	1_27540293,1_27540795,1_27540666,1_27540495,1_27540294,1_27540342,1_27540343,1_27541097,1_27540404,1_27540489,1_27541352,1_27540533,1_27540611,1_27541209,1_27540483,1_27541098,1_27541301	7.42e-130,5.77e-76,1.77e-36,6.07e-35,1e-29,1.37e-28,4.47e-25,1.55e-23,3.55e-16,2.64e-15,1.59e-11,5.41e-07,5.82e-06,9.86e-05,0.000371,0.00106,0.00146	0.43,0.0618,0.0278,0.021,0.0883,0.0434,0.41,0.0183,0.0141,0.0116,0.00975,0.00439,0.00303,0.00271,0.00271,0.00161,0.0022	5.35,2.77,3.57,7.07,16.3,15.8,2.31,3.08,15.1,3.91,4.05,4.93,4.63,3.03,15,12.9,2.57	T:C,T:C,T:C,T:C,T:C,T:C,T:C,T:C,T:C,T:C,T:C,T:C,T:C,T:C,T:C,T:C,T:C
AT4G34640	SQS1	+	AT4G34640.1,AT4G34640.2	85.681225,0.923198	9	4_16541697,4_16541728,4_16541686,4_16540830,4_16540809,4_16540800,4_16541212,4_16541729,4_16541628	8.61e-128,5.46e-87,7.23e-22,8.93e-22,1.99e-12,2.99e-08,1.24e-06,0.000982,0.00131	0.343,0.244,0.051,0.432,0.024,0.0169,0.0141,0.0124,0.0105	8.13,18.1,15.5,1.79,4.76,13.9,3.95,13.3,2.82	A:G,A:G,A:G,A:G,A:G,A:G,A:G,A:G,A:G
AT3G43300	ATMIN7	-	AT3G43300.3,AT3G43300.2,AT3G43300.1	45.5625456,0.05284,0.0337172	20	3_15234623,3_15234485,3_15234456,3_15238783,3_15239315,3_15236771,3_15240728,3_15236737,3_15236819,3_15235835,3_15242839,3_15234439,3_15239765,3_15235871,3_15235897,3_15240685,3_15242970,3_15237769,3_15236607,3_15242027	3.29e-127,1.3e-14,5.03e-13,1.28e-12,4.23e-11,6.99e-10,7.5e-09,1.63e-07,1.74e-07,3.06e-07,5.34e-07,7.27e-06,4.65e-05,5.28e-05,8.18e-05,8.95e-05,0.000103,0.000316,0.000474,0.00166	0.222,0.0225,0.0223,0.043,0.0541,0.034,0.15,0.19,0.0279,0.0699,0.0348,0.0104,0.0458,0.00974,0.0149,0.0559,0.0209,0.0129,0.00948,0.0249	6.7,14.9,16.7,3.9,4.61,4.45,2,1.19,3.29,2.57,4.02,4.65,1.82,14.1,4.43,2.05,12.8,13.6,13,3.23	T:C,T:C,T:C,T:C,T:C,T:C,T:C,T:C,T:C,T:C,T:C,T:C,T:C,T:C,T:C,T:C,T:C,T:C,T:C,T:C
AT5G11770	AT5G11770	-	AT5G11770.1	436.2138722	22	5_3791276,5_3792578,5_3792529,5_3791327,5_3791260,5_3791311,5_3791336,5_3791153,5_3791322,5_3791265,5_3792530,5_3791176,5_3791343,5_3791152,5_3791227,5_3791027,5_3791342,5_3791215,5_3791120,5_3791203,5_3791140,5_3792719	5.66e-127,6.39e-96,7.47e-69,7.18e-57,1.38e-47,4.66e-40,5.4e-33,1.1e-32,1.37e-24,1.24e-22,5.84e-22,7.58e-21,3.65e-17,2.15e-16,3.57e-12,5.4e-12,2.73e-11,6.41e-06,4.6e-05,5e-05,0.000224,0.00149	0.0616,0.0549,0.0297,0.0179,0.0141,0.329,0.0141,0.0129,0.00855,0.00761,0.503,0.00984,0.00737,0.00795,0.00542,0.0127,0.00451,0.00183,0.00248,0.00247,0.00188,0.00141	5.79,3.81,5.18,6.76,7.47,2.56,4.58,6.94,4.66,5.49,1.86,4.79,4.66,4.57,3.61,15.4,4.12,14.1,14.9,4.42,14.1,13.1	T:C,T:C,T:C,T:C,T:C,T:C,T:C,T:C,T:C,T:C,T:C,T:C,T:C,T:C,T:C,T:C,T:C,T:C,T:C,T:C,T:C,T:C
AT5G18800	AT5G18800	+	AT5G18800.2,AT5G18800.1	413.284926,0.7588102	14	5_6267437,5_6268331,5_6268353,5_6267291,5_6268354,5_6268402,5_6267292,5_6268374,5_6268363,5_6268524,5_6268278,5_6268356,5_6267446,5_6267343	5.73e-127,1.51e-40,1.55e-21,1.51e-20,2.12e-14,3.97e-13,1.32e-09,1.81e-08,1.03e-05,2.41e-05,4.47e-05,0.00319,0.00656,0.00985	0.0683,0.0367,0.0153,0.0151,0.00852,0.0109,0.00892,0.00552,0.00421,0.0127,0.00264,0.00189,0.00155,0.00189	4.92,5.42,15.1,15.1,4.43,15.2,4.42,13.7,3.8,13.5,4.48,14.2,3.82,2.93	A:G,A:G,A:G,A:G,A:G,A:G,A:G,A:G,A:G,A:G,A:G,A:G,A:G,A:G
AT4G29010	AIM1	-	AT4G29010.1	76.3957836	3	4_14297795,4_14301987,4_14301763	2.13e-126,6.03e-05,6.65e-05	0.195,0.0283,0.0165	4.53,2.99,3.14	T:C,T:C,T:C
AT2G39460	RPL23AA	+	AT2G39460.1,AT2G39460.2	735.3259256,41.276154	13	2_16475904,2_16475987,2_16475973,2_16475626,2_16475984,2_16475608,2_16475977,2_16475981,2_16475668,2_16476000,2_16476001,2_16475954,2_16476020	4.26e-126,1.9e-111,1.89e-46,3.22e-40,1.02e-32,9.81e-17,1.23e-16,2.94e-13,8.89e-13,7.7e-08,9.13e-06,9.08e-05,0.00575	0.0842,0.107,0.0397,0.0203,0.146,0.0269,0.0152,0.0156,0.00375,0.0076,0.00514,0.00314,0.00501	7.07,6.84,5.96,3.24,3.67,2.23,15.8,15.8,4.83,14.8,14.2,13.5,3.79	A:G,A:G,A:G,A:G,A:G,A:G,A:G,A:G,A:G,A:G,A:G,A:G,A:G
AT2G44520	COX10	+	AT2G44520.1	45.8661904	9	2_18381646,2_18381269,2_18381200,2_18381489,2_18381650,2_18379855,2_18380083,2_18381240,2_18381495	7.99e-126,2.81e-19,9.56e-18,2.09e-08,1.07e-06,0.000453,0.00188,0.00604,0.00732	0.586,0.0802,0.138,0.0231,0.0218,0.0106,0.0175,0.0215,0.0111	3.61,6.25,2.53,14.9,12.8,13.8,3.98,2.62,3.69	A:G,A:G,A:G,A:G,A:G,A:G,A:G,A:G,A:G
AT5G49210	AT5G49210	+	AT5G49210.1,AT5G49210.2,AT5G49210.3	55.9133522,1.9079698,0.080306	3	5_19951470,5_19951585,5_19951469	1.68e-125,1.83e-27,4.75e-13	0.662,0.21,0.0447	2.83,6.8,13.9	A:G,A:G,A:G
AT5G64400	AT5G64400	+	AT5G64400.1,AT5G64400.2,AT5G64400.3	180.2178248,159.315249,0.435097	18	5_25749639,5_25749781,5_25749759,5_25749246,5_25750127,5_25750111,5_25749703,5_25749780,5_25750093,5_25749476,5_25750102,5_25749282,5_25749434,5_25749645,5_25750116,5_25749450,5_25749440,5_25749791	1.73e-124,1.55e-111,2.21e-66,9.85e-58,1.06e-47,2.11e-45,1.18e-41,1.02e-36,2.4e-32,2.4e-29,1.8e-19,1.05e-18,3.09e-16,7.23e-15,1.99e-11,1.12e-09,1.89e-05,0.00377	0.0337,0.0379,0.0159,0.0788,0.0184,0.0169,0.0175,0.0139,0.00891,0.0107,0.0132,0.00585,0.00396,0.00677,0.00529,0.00234,0.00191,0.00114	5.08,6.27,19.1,2.96,5.06,4.79,4.09,5.61,6.94,3.94,5.33,6.24,3.76,2.53,3.61,4.43,4.03,13.9	A:G,A:G,A:G,A:G,A:G,A:G,A:G,A:G,A:G,A:G,A:G,A:G,A:G,A:G,A:G,A:G,A:G,A:G
AT1G49240	ACT8	+	AT1G49240.1	637.0481918	24	1_18218086,1_18218126,1_18216685,1_18218085,1_18218095,1_18218192,1_18217633,1_18217625,1_18216762,1_18217061,1_18216787,1_18217619,1_18217235,1_18218089,1_18216913,1_18217621,1_18217333,1_18215998,1_18215988,1_18216849,1_18216845,1_18217386,1_18215990,1_18217911	4.09e-123,1.86e-122,9.11e-94,6.61e-64,1.4e-45,8.54e-34,2.6e-33,5.81e-27,3.3e-22,7.95e-17,3.07e-13,6.3e-08,8.41e-08,9.38e-08,1.74e-07,3.03e-07,1.02e-06,0.00014,0.000256,3e-04,0.000349,0.00106,0.00206,0.00547	0.0918,0.101,0.049,0.0309,0.425,0.0594,0.0964,0.0101,0.0074,0.0117,0.0296,0.00306,0.00469,0.00404,0.00383,0.00296,0.00291,0.00219,0.00315,0.00206,0.00218,0.00132,0.00211,0.00197	7.59,9.24,3.61,6.06,3.25,7.08,1.99,4.23,4.18,3.69,1.9,3.31,2.76,4.23,3.55,3.6,4.78,4.36,3.42,3.51,3.07,4.1,4.06,2.94	A:G,A:G,A:G,A:G,A:G,A:G,A:G,A:G,A:G,A:G,A:G,A:G,A:G,A:G,A:G,A:G,A:G,A:G,A:G,A:G,A:G,A:G,A:G,A:G
AT3G47810	VPS29	-	AT3G47810.3,AT3G47810.1,AT3G47810.2	245.13051,8.3585062,2.1938396	10	3_17637399,3_17638926,3_17637343,3_17637400,3_17638953,3_17637325,3_17637395,3_17638167,3_17637276,3_17639027	2.78e-122,2.16e-73,1.66e-54,2.57e-19,9.04e-09,2.67e-08,0.000447,0.0021,0.00364,0.00634	0.143,0.124,0.208,0.0158,0.00704,0.00782,0.00398,0.00276,0.00695,0.0037	5.08,3.45,3.27,6.25,5.22,13.7,4.19,3.19,13.1,2.63	T:C,T:C,T:C,T:C,T:C,T:C,T:C,T:C,T:C,T:C
AT3G52200	LTA3	+	AT3G52200.1,AT3G52200.2	93.2262902,0.1215786	12	3_19365878,3_19364562,3_19366095,3_19365165,3_19366077,3_19365748,3_19362774,3_19365844,3_19365326,3_19366195,3_19364262,3_19361978	6.83e-122,1.63e-14,2.83e-13,2.63e-11,1.94e-05,2.01e-05,0.000158,0.000489,0.000698,0.00245,0.00443,0.00853	0.251,0.0328,0.0221,0.0278,0.00784,0.0103,0.0176,0.0079,0.00984,0.0162,0.00781,0.00567	8.08,14.9,5.72,5.56,14.8,4.57,2.88,4.17,4.14,12.3,3.75,3.68	A:G,A:G,A:G,A:G,A:G,A:G,A:G,A:G,A:G,A:G,A:G,A:G
AT2G17420	NTRA	+	AT2G17420.1,AT2G17420.2	503.7618348,1.3323322	16	2_7566235,2_7566383,2_7566413,2_7566377,2_7565382,2_7566412,2_7565272,2_7566333,2_7566401,2_7564705,2_7566384,2_7565223,2_7564963,2_7564984,2_7564605,2_7565198	1.95e-121,6.18e-64,2.49e-61,3.35e-36,1.48e-21,3.24e-21,6.23e-14,3.23e-08,0.000232,0.000344,0.000592,0.000678,0.000682,0.000982,0.00236,0.00834	0.095,0.0742,0.112,0.0299,0.00784,0.0357,0.0118,0.00794,0.00717,0.00275,0.00348,0.00202,0.0038,0.00609,0.00226,0.00176	7.57,7.08,7,17.2,3.68,6.41,3.08,5.15,4.32,2.25,13.1,2.72,2.39,1.82,2.21,2.75	A:G,A:G,A:G,A:G,A:G,A:G,A:G,A:G,A:G,A:G,A:G,A:G,A:G,A:G,A:G,A:G
AT4G27000	RBP45C	-	AT4G27000.1	148.4761494	18	4_13554788,4_13554794,4_13554762,4_13554905,4_13554787,4_13554789,4_13555412,4_13557675,4_13554942,4_13554790,4_13554862,4_13557582,4_13554946,4_13554969,4_13554793,4_13557280,4_13554970,4_13557309	9.53e-121,1.4e-72,1.41e-69,1.67e-66,2.45e-60,1.57e-52,2.74e-50,1.42e-41,1.74e-37,7.38e-22,2.53e-19,4.67e-12,1.98e-10,9.48e-08,9.55e-07,1.25e-05,7.95e-05,0.000183	0.538,0.611,0.276,0.0979,0.199,0.169,0.116,0.0642,0.0473,0.0663,0.0295,0.0211,0.0121,0.0098,0.0183,0.0186,0.00564,0.00532	5.22,3.6,8.41,8.2,5.78,5.89,3.96,3.4,5.27,6.59,15.3,3.17,5.46,4.19,14.2,1.95,4.43,4.36	T:C,T:C,T:C,T:C,T:C,T:C,T:C,T:C,T:C,T:C,T:C,T:C,T:C,T:C,T:C,T:C,T:C,T:C
AT3G14600	RPL18AC	+	AT3G14600.1	408.1432476	18	3_4911466,3_4911932,3_4911271,3_4911866,3_4912104,3_4911676,3_4911767,3_4911935,3_4911862,3_4911456,3_4911905,3_4911806,3_4911623,3_4911898,3_4911342,3_4911989,3_4911892,3_4911677	1.05e-120,6.07e-83,1.39e-73,1.64e-21,9.34e-18,9.26e-17,1.71e-15,1.19e-10,1.14e-08,4.49e-06,7.67e-06,3.02e-05,3.76e-05,0.000166,0.000261,0.00117,0.00375,0.00805	0.0423,0.0741,0.0494,0.0139,0.086,0.00749,0.0108,0.0112,0.00458,0.00249,0.00538,0.00368,0.00222,0.00295,0.00411,0.00561,0.00313,0.00323	4.84,18.6,3.66,5.48,14.9,4.31,3.11,5.46,15.4,3.41,4.67,3.3,3.75,12.8,1.51,12.3,3.12,2.72	A:G,A:G,A:G,A:G,A:G,A:G,A:G,A:G,A:G,A:G,A:G,A:G,A:G,A:G,A:G,A:G,A:G,A:G
AT4G34180	AT4G34180	-	AT4G34180.1	221.034957	25	4_16369982,4_16369979,4_16370110,4_16370566,4_16370056,4_16370093,4_16370168,4_16370555,4_16369938,4_16370631,4_16370551,4_16370627,4_16369935,4_16370392,4_16370584,4_16370614,4_16369937,4_16370141,4_16371099,4_16370568,4_16371059,4_16370105,4_16370385,4_16371152,4_16371200	3.34e-120,3.12e-75,2.13e-68,9.39e-65,1.62e-43,4.55e-32,5.29e-30,2.21e-24,2.8e-21,4.93e-15,6.76e-15,4.08e-13,3.37e-10,7.37e-10,8.15e-09,5.82e-08,2.62e-06,5.5e-06,9.07e-06,1.83e-05,8.58e-05,0.000148,0.000347,0.000391,0.000505	0.14,0.0667,0.0444,0.0465,0.0569,0.0301,0.0389,0.0163,0.0325,0.017,0.0163,0.00773,0.0148,0.00542,0.00875,0.00633,0.0098,0.00629,0.00266,0.00497,0.00413,0.00491,0.00299,0.00421,0.00445	19.5,16.5,8.07,6.03,6.54,4.62,5.4,16.3,6.39,4.13,5.09,16.6,13.7,13.7,3.55,4.22,13.1,3.32,13.7,3.77,2.95,2.84,4.24,3.46,2.52	T:C,T:C,T:C,T:C,T:C,T:C,T:C,T:C,T:C,T:C,T:C,T:C,T:C,T:C,T:C,T:C,T:C,T:C,T:C,T:C,T:C,T:C,T:C,T:C,T:C
AT2G21580	RPS25B	+	AT2G21580.1,AT2G21580.2	458.966787,0.7612914	15	2_9237503,2_9237435,2_9237443,2_9237436,2_9237258,2_9237427,2_9237400,2_9237512,2_9237167,2_9237161,2_9237502,2_9237509,2_9237259,2_9237454,2_9237164	2.04e-119,1.32e-93,7.95e-90,2.26e-88,8.56e-33,9.23e-21,1.08e-15,3.42e-15,2.11e-12,1.87e-11,9.38e-10,6.04e-08,4.82e-07,9.91e-05,0.000267	0.0743,0.0987,0.0389,0.0328,0.00989,0.0647,0.303,0.00972,0.00753,0.0067,0.00459,0.00471,0.00236,0.00324,0.00107	8.99,4.84,5.94,6.87,6.02,2.29,1.86,5.92,2.98,2.96,15.9,5.09,4.89,2.61,13.7	A:G,A:G,A:G,A:G,A:G,A:G,A:G,A:G,A:G,A:G,A:G,A:G,A:G,A:G,A:G
AT4G35260	IDH1	-	AT4G35260.1	176.5912752	9	4_16774406,4_16774500,4_16774921,4_16774596,4_16774589,4_16774462,4_16774640,4_16774570,4_16775461	4.5e-119,6.21e-33,6.88e-21,4.97e-11,1.34e-07,0.000141,0.000314,0.0033,0.00811	0.209,0.0293,0.0204,0.00868,0.00811,0.00742,0.00287,0.00319,0.00254	8.92,6.01,5.41,15.3,4.09,3.5,13.3,3.83,3.68	T:C,T:C,T:C,T:C,T:C,T:C,T:C,T:C,T:C
AT4G28060	COX6B-3	-	AT4G28060.1	274.1902852	7	4_13944223,4_13944185,4_13944220,4_13944332,4_13943973,4_13943926,4_13943971	1.77e-118,4.57e-54,4.02e-38,1.93e-20,3.65e-05,5.22e-05,0.00106	0.0634,0.38,0.051,0.246,0.00777,0.01,0.00465	8.88,3.44,2.04,2.54,4.48,13.7,14	T:C,T:C,T:C,T:C,T:C,T:C,T:C
AT5G37510	EMB1467	+	AT5G37510.1,AT5G37510.2	197.5264478,6.7375554	20	5_14900475,5_14900234,5_14900447,5_14899859,5_14900348,5_14900433,5_14899766,5_14900347,5_14899892,5_14900250,5_14900065,5_14900067,5_14899833,5_14900492,5_14900251,5_14900346,5_14899596,5_14899901,5_14898883,5_14899063	4.65e-118,1.99e-62,1.97e-21,4.71e-21,1.08e-14,1.4e-12,2.29e-10,2.71e-10,3.62e-10,6.37e-10,9.28e-09,2.88e-07,3.07e-06,3.38e-05,0.000408,0.000742,0.00103,0.00328,0.00613,0.00641	0.265,0.0893,0.0391,0.0174,0.0194,0.0227,0.00957,0.0151,0.0093,0.0157,0.011,0.0124,0.00729,0.0141,0.00414,0.00418,0.00385,0.00257,0.00286,0.0051	9.08,3.72,15.1,4.3,5.84,5.65,4.09,15.7,3.46,4.5,4.32,2.55,3.13,13.6,13.3,13.3,3.31,3.88,3.77,1.7	A:G,A:G,A:G,A:G,A:G,A:G,A:G,A:G,A:G,A:G,A:G,A:G,A:G,A:G,A:G,A:G,A:G,A:G,A:G,A:G
AT5G39600	AT5G39600	-	AT5G39600.1	30.6593554	5	5_15854152,5_15854134,5_15854177,5_15854562,5_15854537	5.48e-118,7.61e-24,7.39e-13,3.3e-05,0.000542	0.532,0.0902,0.0506,0.0165,0.0216	5.38,15,14.1,4.53,2.52	T:C,T:C,T:C,T:C,T:C
AT1G09690	RPL21A	-	AT1G09690.1	1237.2101652	11	1_3136642,1_3136657,1_3136353,1_3136646,1_3136340,1_3137369,1_3136472,1_3136576,1_3136570,1_3136429,1_3136643	1.64e-117,9.65e-81,1.59e-28,2.37e-17,2.99e-14,1.75e-13,3.78e-07,2.11e-05,2.4e-05,8.87e-05,0.000308	0.0196,0.0127,0.0204,0.00282,0.0119,0.00377,0.00681,0.00179,0.00162,0.00218,0.000886	5.93,7.32,16.2,5.3,4.94,3.15,2.24,2.65,2.71,4.35,3.03	T:C,T:C,T:C,T:C,T:C,T:C,T:C,T:C,T:C,T:C,T:C
AT4G11420	TIF3A1	-	AT4G11420.1	77.1150484	18	4_6948143,4_6947789,4_6948160,4_6947896,4_6948175,4_6948181,4_6948137,4_6947788,4_6948496,4_6949324,4_6948548,4_6948119,4_6947719,4_6948344,4_6947786,4_6948065,4_6948490,4_6948248	9.73e-117,4.05e-36,7.98e-26,3.01e-19,1.48e-18,2.64e-14,1.46e-12,2.63e-09,7.72e-08,3.05e-07,1.95e-06,8.11e-06,2.69e-05,6.22e-05,7.24e-05,0.00106,0.00153,0.00564	0.13,0.063,0.0273,0.318,0.181,0.152,0.0136,0.0165,0.0122,0.0211,0.0111,0.00458,0.0137,0.00612,0.0131,0.00452,0.00566,0.00405	6.07,15.8,4.27,2.57,3.34,2.49,4.22,13.8,4.97,3.27,4.7,14.3,13.5,4.36,3.59,3.99,3.93,3.71	T:C,T:C,T:C,T:C,T:C,T:C,T:C,T:C,T:C,T:C,T:C,T:C,T:C,T:C,T:C,T:C,T:C,T:C
AT5G63400	ADK1	-	AT5G63400.1,AT5G63400.2	437.2895552,0.021541	27	5_25393256,5_25394785,5_25394241,5_25393550,5_25394729,5_25393270,5_25393731,5_25394174,5_25393797,5_25393209,5_25393213,5_25393238,5_25394148,5_25393291,5_25393111,5_25393924,5_25394244,5_25394150,5_25393785,5_25393732,5_25393092,5_25393267,5_25394193,5_25393796,5_25394259,5_25393259,5_25394173	3.54e-116,1.06e-69,1.98e-45,3.28e-44,1e-42,1.89e-40,5.34e-28,1.62e-27,1.66e-27,2.49e-22,2.56e-13,4.18e-12,1.09e-10,5.92e-10,5.38e-09,3.31e-08,4.82e-08,4.83e-08,4.92e-07,2.71e-06,3.51e-05,3.58e-05,3.79e-05,5.92e-05,7.33e-05,0.000394,0.00751	0.0927,0.0757,0.0205,0.365,0.0185,0.0274,0.0112,0.0726,0.0177,0.0232,0.01,0.00812,0.00501,0.0068,0.0105,0.00425,0.00223,0.00317,0.00583,0.00311,0.00845,0.00296,0.00407,0.00359,0.0019,0.00343,0.00114	5.21,4.67,4.36,1.99,5.19,5.77,16.7,2.55,4.41,16.7,5.72,5.62,4.09,4,13.1,5.12,14.4,5.07,4.09,4.75,13.4,13.4,2.24,3.55,3.62,4.22,3.72	T:C,T:C,T:C,T:C,T:C,T:C,T:C,T:C,T:C,T:C,T:C,T:C,T:C,T:C,T:C,T:C,T:C,T:C,T:C,T:C,T:C,T:C,T:C,T:C,T:C,T:C,T:C
AT2G42210	OEP163	+	AT2G42210.1,AT2G42210.3,AT2G42210.4,AT2G42210.2,AT2G42210.5	189.6638704,61.8674846,29.7111658,0.8001612,0.3768522	12	2_17591619,2_17591548,2_17591546,2_17591571,2_17591490,2_17591557,2_17591526,2_17590639,2_17590810,2_17590269,2_17590704,2_17591541	4.34e-116,2.34e-61,2.38e-52,4.53e-37,1.96e-17,1.21e-08,1.29e-08,1.5e-06,0.000539,0.000596,0.000908,0.00174	0.124,0.0559,0.0414,0.0332,0.0161,0.00587,0.00606,0.0119,0.00354,0.00749,0.00461,0.00239	19,17.7,5.75,5.68,3.45,14.3,4.32,3,2.72,4.18,2.64,12.5	A:G,A:G,A:G,A:G,A:G,A:G,A:G,A:G,A:G,A:G,A:G,A:G
AT3G58500	PP2A3	-	AT3G58500.1	184.0611828	17	3_21635533,3_21638943,3_21635539,3_21638862,3_21635400,3_21636995,3_21638081,3_21638080,3_21635357,3_21635537,3_21636599,3_21636199,3_21638881,3_21635399,3_21635401,3_21635498,3_21635719	1.05e-115,6.95e-38,1.41e-34,1.1e-30,1.1e-26,3.73e-25,3.66e-13,1.69e-11,3e-07,6.15e-07,4.08e-06,5.2e-06,7.75e-06,1.72e-05,0.000866,0.000885,0.00375	0.135,0.0443,0.0369,0.0296,0.0528,0.0227,0.0179,0.0117,0.0149,0.012,0.00619,0.0187,0.00845,0.0098,0.00574,0.0034,0.00358	6.97,4.61,4.38,5.42,5.23,4.54,4.33,5.52,13.7,3.28,3.48,1.54,2.89,4.59,12.3,13,3.88	T:C,T:C,T:C,T:C,T:C,T:C,T:C,T:C,T:C,T:C,T:C,T:C,T:C,T:C,T:C,T:C,T:C
AT1G53240	mMDH1	-	AT1G53240.1	511.9472572	15	1_19854861,1_19855660,1_19855035,1_19855862,1_19854855,1_19855946,1_19855090,1_19856307,1_19855693,1_19856397,1_19855006,1_19855440,1_19855697,1_19856362,1_19854924	2.04e-115,3.82e-89,2.58e-24,1.76e-19,3.48e-10,7.88e-09,2.49e-08,2.92e-06,0.000239,0.000362,0.000415,0.000675,0.00158,0.00364,0.00859	0.073,0.0429,0.0122,0.00937,0.00613,0.00412,0.00476,0.00487,0.00107,0.00142,0.00151,0.00102,0.00195,0.00147,0.00173	6.86,3.51,3.49,3.16,13.8,3.92,5.25,2.18,12.3,4.23,4.2,13.6,2.25,3.13,2.97	T:C,T:C,T:C,T:C,T:C,T:C,T:C,T:C,T:C,T:C,T:C,T:C,T:C,T:C,T:C
AT5G55070	AT5G55070	+	AT5G55070.1,AT5G55070.2	117.490891,3.0216672	15	5_22350479,5_22350515,5_22349731,5_22350514,5_22350513,5_22350379,5_22350548,5_22350512,5_22350320,5_22349824,5_22349789,5_22350427,5_22349007,5_22350089,5_22349092	5.16e-115,5.22e-81,2.78e-67,1.41e-38,1.62e-31,3.47e-30,3.68e-25,2.22e-18,1.21e-16,1.56e-13,1.38e-05,3.35e-05,0.00053,0.0048,0.00505	0.245,0.179,0.139,0.0804,0.0609,0.0417,0.0652,0.0351,0.0209,0.0271,0.0076,0.00787,0.00289,0.00597,0.0047	7.28,6.76,3.65,7.2,15.8,15.2,4.75,14.9,5.1,3.52,12.6,12.7,12.7,3.78,2.63	A:G,A:G,A:G,A:G,A:G,A:G,A:G,A:G,A:G,A:G,A:G,A:G,A:G,A:G,A:G
AT1G69510	AT1G69510	+	AT1G69510.1,AT1G69510.3,AT1G69510.2	169.3323972,163.2411764,0.243529	25	1_26127869,1_26127370,1_26127500,1_26127192,1_26127792,1_26127791,1_26127328,1_26127173,1_26127846,1_26127757,1_26127936,1_26127947,1_26127859,1_26127799,1_26127487,1_26126784,1_26127477,1_26127070,1_26127049,1_26127828,1_26127333,1_26127707,1_26127913,1_26127069,1_26126793	5.29e-114,5.73e-81,1.85e-55,8.61e-47,5.05e-26,1.26e-19,2.38e-16,2.09e-15,4.72e-13,4.41e-10,5.68e-10,9.84e-10,1.02e-09,1.68e-08,3.27e-08,1.04e-06,1.47e-06,2.68e-06,6.83e-05,0.000117,0.000196,0.000736,0.0016,0.00163,0.00507	0.283,0.0593,0.0604,0.042,0.0523,0.0245,0.00739,0.00784,0.0184,0.0121,0.134,0.212,0.0161,0.00893,0.00446,0.00353,0.00389,0.00485,0.00212,0.00553,0.00292,0.00279,0.0152,0.00263,0.0056	8.02,6.84,4.79,4.71,5.16,6.3,14.8,5.99,16.1,5.38,14.2,13.5,13.8,15,14.4,15.5,4.83,3.21,12.9,12.3,3.12,12.8,12.2,3.45,1.81	A:G,A:G,A:G,A:G,A:G,A:G,A:G,A:G,A:G,A:G,A:G,A:G,A:G,A:G,A:G,A:G,A:G,A:G,A:G,A:G,A:G,A:G,A:G,A:G,A:G
AT5G43830	AT5G43830	-	AT5G43830.1	273.2208714	6	5_17622563,5_17622440,5_17622524,5_17622568,5_17622672,5_17622638	9.1e-114,2.64e-61,1.32e-52,0.000895,0.00381,0.00554	0.175,0.168,0.0931,0.00483,0.00375,0.0019	5.92,17.4,7.96,4.34,2.77,3.8	T:C,T:C,T:C,T:C,T:C,T:C
AT5G48230	AAT1	-	AT5G48230.2,AT5G48230.1	191.617519,0.1478492	11	5_19552634,5_19553429,5_19554785,5_19553078,5_19552448,5_19552202,5_19554675,5_19552347,5_19553387,5_19553187,5_19552588	2.49e-113,3.35e-10,9.08e-10,5.39e-09,1.46e-08,4.49e-08,1.76e-07,1.45e-06,0.000992,0.00109,0.00305	0.145,0.0138,0.0117,0.00655,0.00663,0.173,0.00955,0.00698,0.00326,0.00352,0.00604	4.95,4.04,3.39,13.9,13.9,14.6,3.13,14,13.9,4.04,2.29	T:C,T:C,T:C,T:C,T:C,T:C,T:C,T:C,T:C,T:C,T:C
AT4G17040	CLPR4	-	AT4G17040.1	49.4187332	5	4_9585864,4_9585865,4_9589049,4_9589101,4_9587394	2.57e-113,1.24e-09,2.93e-06,5.13e-06,6.91e-05	0.546,0.0448,0.0189,0.0197,0.00634	8.18,13.9,14.7,3.42,14.5	T:C,T:C,T:C,T:C,T:C
AT4G13520	SMAP1	+	AT4G13520.1,AT4G13520.2	207.9605758,0.278003	5	4_7864558,4_7864559,4_7864646,4_7864649,4_7864631	5.13e-113,2.94e-103,3.78e-64,1.16e-07,0.000248	0.115,0.085,0.0637,0.00627,0.0046	4.64,6.7,4.94,13.9,3.51	A:G,A:G,A:G,A:G,A:G
AT2G34480	RPL18AB	-	AT2G34480.1,AT2G34480.2	1343.7885684,0.3496968	16	2_14532915,2_14532816,2_14532944,2_14532947,2_14533181,2_14532969,2_14533197,2_14533209,2_14532917,2_14533041,2_14533010,2_14532938,2_14533182,2_14533980,2_14533205,2_14532962	1.83e-112,3.37e-99,3.67e-48,8.92e-20,1.64e-10,2.03e-10,2.33e-08,6.92e-08,3.29e-07,2.52e-05,4.92e-05,9.88e-05,0.000724,0.000975,0.00112,0.0026	0.0433,0.0541,0.0164,0.00503,0.00211,0.00235,0.00126,0.00285,0.00199,0.00305,0.00152,0.00173,0.00128,0.00106,0.000889,0.0014	5.03,19.5,4.68,6.27,3.59,14.5,4.29,2.28,14.2,2.15,3.67,3.59,1.87,2.65,2.44,2.51	T:C,T:C,T:C,T:C,T:C,T:C,T:C,T:C,T:C,T:C,T:C,T:C,T:C,T:C,T:C,T:C
AT4G36760	ATAPP1	+	AT4G36760.1,AT4G36760.3,AT4G36760.2	43.152304,3.4672086,0.16306	5	4_17329859,4_17329861,4_17329616,4_17329921,4_17327104	1.3e-111,6.77e-15,2.58e-06,0.00126,0.00295	0.293,0.0321,0.0143,0.01,0.0144	5.85,14.8,13.7,13.1,3.17	A:G,A:G,A:G,A:G,A:G
AT5G67590	FRO1	+	AT5G67590.1	353.0169932	7	5_26959352,5_26959351,5_26959389,5_26959409,5_26958739,5_26958991,5_26958100	1.99e-111,1.63e-84,3.76e-28,1.94e-18,1.79e-15,1.03e-07,0.0037	0.109,0.078,0.078,0.0227,0.00689,0.00485,0.004	17.2,6.76,3.72,6.11,5.92,14,3.77	A:G,A:G,A:G,A:G,A:G,A:G,A:G
AT2G01490	PAHX	+	AT2G01490.1,AT2G01490.2	50.5657176,20.5353728	9	2_223206,2_223208,2_223207,2_223174,2_222718,2_223022,2_222752,2_221709,2_221362	2.16e-111,1.16e-57,4.14e-15,4.87e-10,9.29e-09,2.28e-07,0.000455,0.000461,0.00764	0.37,0.159,0.039,0.0232,0.0138,0.0132,0.00577,0.00482,0.00562	6.94,17.9,15.7,5.39,5.2,13.5,14.4,14.1,3.71	A:G,A:G,A:G,A:G,A:G,A:G,A:G,A:G,A:G
AT1G76010	AT1G76010	-	AT1G76010.1,AT1G76010.2	269.0143434,0	17	1_28528477,1_28528471,1_28528464,1_28528465,1_28528474,1_28528362,1_28528466,1_28530736,1_28529817,1_28528579,1_28530661,1_28528150,1_28528594,1_28528818,1_28530022,1_28528468,1_28528467	6.66e-111,6.4e-64,1.05e-42,8.01e-24,2.97e-20,3.48e-19,8.24e-15,1.13e-14,4.12e-11,5.67e-10,1.45e-07,7.93e-07,7.97e-07,0.000513,0.0017,0.00298,0.00939	0.0842,0.0455,0.0361,0.0221,0.0184,0.384,0.0125,0.0809,0.0244,0.0102,0.0168,0.0897,0.00716,0.00555,0.00825,0.00291,0.00354	6.02,6.41,5.47,16.3,5.45,2.5,4.97,4.43,1.72,3.68,1.77,13.4,3.06,1.88,1.73,13.4,2.49	T:C,T:C,T:C,T:C,T:C,T:C,T:C,T:C,T:C,T:C,T:C,T:C,T:C,T:C,T:C,T:C,T:C
AT3G55750	RPL35AD	+	AT3G55750.1	467.876378	7	3_20699518,3_20699359,3_20699520,3_20699374,3_20699405,3_20700015,3_20699977	1.25e-110,6.84e-32,6.27e-14,3.95e-13,1.66e-12,3.78e-11,4.32e-08	0.0628,0.0286,0.0287,0.331,0.00549,0.0844,0.0255	4.58,2.98,3.3,1.64,5.65,14.8,14.5	A:G,A:G,A:G,A:G,A:G,A:G,A:G
AT2G19830	VPS32.1	-	AT2G19830.2,AT2G19830.1	81.0890544,1.091337	1	2_8558102	1.43e-110	0.385	5.07	T:C
AT1G27435	AT1G27435	-	AT1G27435.1	179.619068	19	1_9527845,1_9527853,1_9527883,1_9527944,1_9527888,1_9527911,1_9527844,1_9527940,1_9527882,1_9527879,1_9527884,1_9527880,1_9528767,1_9527885,1_9527934,1_9527898,1_9528770,1_9527877,1_9527842	3.59e-110,1.6e-64,2.8e-37,5.42e-36,3.5e-31,2.23e-30,2.23e-24,9.3e-21,4.83e-19,5.59e-19,9.61e-18,2.33e-08,6.59e-08,5.89e-06,0.000186,0.000355,0.000516,0.000831,0.0018	0.177,0.094,0.0451,0.0349,0.377,0.0353,0.0391,0.0205,0.022,0.0218,0.0236,0.00953,0.00758,0.00812,0.00382,0.00473,0.00524,0.00457,0.00601	18.2,6.04,15.4,16.4,2.96,16.4,15.2,6.33,16.3,15.7,16.4,13.1,14.1,4.71,13.7,13.5,12.2,12,13.4	T:C,T:C,T:C,T:C,T:C,T:C,T:C,T:C,T:C,T:C,T:C,T:C,T:C,T:C,T:C,T:C,T:C,T:C,T:C
AT5G61970	AT5G61970	+	AT5G61970.1	37.3925366	5	5_24893037,5_24891172,5_24893115,5_24893036,5_24893038	3.55e-109,6.37e-17,1.47e-09,6.78e-08,1.38e-05	0.406,0.175,0.0432,0.0392,0.025	8.99,3.79,13.8,5.06,13	A:G,A:G,A:G,A:G,A:G
AT1G10630	ATARFA1F	-	AT1G10630.1,AT1G10630.2	181.6626222,0.4126826	5	1_3513734,1_3513367,1_3513364,1_3513085,1_3513623	7.81e-108,5.46e-05,0.000253,0.000382,0.00194	0.0844,0.00404,0.00387,0.00801,0.00208	4.44,13.2,13.8,12.8,3.19	T:C,T:C,T:C,T:C,T:C
AT5G15610	AT5G15610	+	AT5G15610.2,AT5G15610.1	50.1185706,1.5921792	9	5_5081977,5_5081138,5_5080586,5_5080088,5_5081048,5_5080564,5_5081871,5_5081732,5_5081878	9.75e-107,2e-12,8.4e-10,4.42e-08,4.58e-08,6.04e-06,8.01e-05,0.000273,0.000366	0.306,0.0411,0.14,0.0229,0.0339,0.0242,0.0128,0.009,0.00884	8.9,4.77,1.98,4.2,13.4,13,4.42,13,13.5	A:G,A:G,A:G,A:G,A:G,A:G,A:G,A:G,A:G
AT2G40316	AT2G40316	+	AT2G40316.1,AT2G40316.2,AT2G40316.3	17.1440688,1.1914504,0.6505496	4	2_16838691,2_16838128,2_16838824,2_16838783	1.05e-106,1.45e-10,9.16e-08,0.00335	0.575,0.0695,0.0656,0.0223	3.49,4.55,13,12.8	A:G,A:G,A:G,A:G
AT2G32720	CYTB5-B	-	AT2G32720.1,AT2G32720.2	46.1337998,4.5646152	1	2_13877049	1.41e-106	0.171	4.48	T:C
AT1G09760	U2A'	-	AT1G09760.1	72.8222352	15	1_3159473,1_3159374,1_3159370,1_3159773,1_3159444,1_3159474,1_3159357,1_3159335,1_3159755,1_3159430,1_3159583,1_3159421,1_3159302,1_3159763,1_3161563	5.25e-106,6.77e-97,1.96e-77,2.08e-48,1.85e-47,1.38e-17,2.22e-11,2.76e-08,1.01e-07,2.98e-07,2.57e-05,8.49e-05,0.000108,0.000183,0.000253	0.224,0.314,0.206,0.0799,0.0917,0.0296,0.0346,0.0365,0.0117,0.013,0.00703,0.0108,0.0245,0.00588,0.0132	5.62,5.25,17.8,5.6,5.61,15.3,15,5.14,5,14.1,12.6,4.4,13.1,12.3,3.49	T:C,T:C,T:C,T:C,T:C,T:C,T:C,T:C,T:C,T:C,T:C,T:C,T:C,T:C,T:C
AT3G46430	AT3G46430	+	AT3G46430.1	378.7984002	15	3_17088714,3_17088679,3_17088000,3_17088533,3_17088651,3_17087981,3_17088603,3_17088535,3_17088519,3_17088570,3_17088650,3_17088549,3_17088554,3_17087974,3_17087970	5.8e-106,1.43e-102,8.9e-24,3.27e-23,1.7e-21,7.79e-21,1.61e-19,6.84e-16,1.49e-12,6.92e-12,1.04e-09,2.55e-08,5.79e-07,4.78e-06,0.000274	0.27,0.191,0.462,0.0174,0.0286,0.0131,0.0258,0.0146,0.0102,0.0126,0.0128,0.00704,0.00597,0.00447,0.00214	18.3,17.6,4.26,6.49,14.7,4.52,6.33,4.52,5.68,5.58,15.5,14.6,13.8,3.84,14.3	A:G,A:G,A:G,A:G,A:G,A:G,A:G,A:G,A:G,A:G,A:G,A:G,A:G,A:G,A:G
AT4G09800	RPS18A	+	AT4G09800.1	496.8873204	30	4_6173816,4_6174628,4_6174588,4_6174935,4_6174667,4_6174644,4_6174727,4_6174314,4_6174627,4_6174680,4_6174928,4_6174674,4_6174692,4_6174702,4_6174951,4_6173766,4_6174299,4_6174934,4_6174758,4_6174953,4_6174906,4_6174881,4_6174332,4_6174933,4_6174629,4_6174643,4_6174334,4_6174337,4_6174298,4_6174860	2.7e-105,4.15e-81,5.68e-78,2.13e-38,9.65e-38,1.67e-32,1.35e-29,3.1e-29,4.63e-24,8.84e-18,4.43e-14,7.91e-12,2e-10,4.1e-10,1.88e-09,2.76e-09,2.61e-08,1.16e-07,8.94e-07,5.6e-06,7.13e-06,5.64e-05,7.67e-05,0.000126,0.000221,0.000368,0.00157,0.00361,0.00514,0.00679	0.0759,0.0343,0.0748,0.0299,0.0155,0.0208,0.0161,0.0145,0.0134,0.47,0.0129,0.00474,0.0134,0.00581,0.00737,0.0238,0.00389,0.00552,0.00316,0.00397,0.00458,0.00205,0.00198,0.00261,0.00142,0.00212,0.00224,0.00249,0.00229,0.00193	4.51,5.85,3.39,7.21,5.04,4.63,6.95,4.99,5.65,1.45,15.5,4.21,2.4,3.1,4.41,15,4.26,4.99,4.86,13.2,4.47,13.2,14.7,13.6,14.2,3.03,2.54,2.09,2.41,3.92	A:G,A:G,A:G,A:G,A:G,A:G,A:G,A:G,A:G,A:G,A:G,A:G,A:G,A:G,A:G,A:G,A:G,A:G,A:G,A:G,A:G,A:G,A:G,A:G,A:G,A:G,A:G,A:G,A:G,A:G
AT5G19510	AT5G19510	-	AT5G19510.1	937.465754	28	5_6582198,5_6581909,5_6582181,5_6582199,5_6581996,5_6582346,5_6582365,5_6581936,5_6581903,5_6581931,5_6581988,5_6581904,5_6581894,5_6582906,5_6583068,5_6582182,5_6581892,5_6581888,5_6581926,5_6583185,5_6583213,5_6581861,5_6582356,5_6582171,5_6583108,5_6581845,5_6583065,5_6582697	2.7e-105,1.27e-51,6.07e-51,2.26e-42,4.7e-28,1.45e-21,8.86e-20,3.05e-19,1.87e-16,3.95e-15,2.23e-14,2.08e-13,4.71e-12,6.54e-11,2.62e-10,9.8e-08,4.96e-07,6.41e-07,9.33e-07,2.98e-06,3.09e-06,4.04e-06,0.000418,0.000946,0.002,0.00272,0.0051,0.00659	0.0547,0.0338,0.0144,0.0104,0.0125,0.00854,0.00611,0.102,0.00632,0.00479,0.162,0.00543,0.00562,0.00272,0.00536,0.00263,0.00246,0.00365,0.00304,0.0188,0.165,0.00309,0.00102,0.002,0.00238,0.00238,0.00117,0.000571	3.76,4.4,4.98,5.86,4.45,3.94,4.88,1.86,5.11,5.95,1.93,4.36,4.74,3.79,3.22,3.79,14.5,4.96,3.44,4.72,3.81,4.7,4.21,1.93,3.14,3.14,3.6,3.76	T:C,T:C,T:C,T:C,T:C,T:C,T:C,T:C,T:C,T:C,T:C,T:C,T:C,T:C,T:C,T:C,T:C,T:C,T:C,T:C,T:C,T:C,T:C,T:C,T:C,T:C,T:C,T:C
AT3G53670	AT3G53670	+	AT3G53670.1,AT3G53670.2	78.5642134,3.5237512	12	3_19892084,3_19892080,3_19892092,3_19891903,3_19892085,3_19892027,3_19892093,3_19892081,3_19891937,3_19892121,3_19891135,3_19891980	5.08e-105,5.71e-52,2.22e-47,9.82e-43,2.03e-27,1.68e-17,3.49e-16,1.97e-12,1.94e-10,5.55e-10,1.59e-06,0.000414	0.309,0.112,0.114,0.0796,0.0582,0.0526,0.041,0.0249,0.0193,0.0217,0.0377,0.00942	5.19,7.66,7.52,5.88,6.73,3.84,5.07,15,14.7,14.2,3.54,4.23	A:G,A:G,A:G,A:G,A:G,A:G,A:G,A:G,A:G,A:G,A:G,A:G
AT5G07470	MSRA3	-	AT5G07470.1	190.278211	11	5_2362683,5_2364129,5_2362902,5_2362652,5_2364019,5_2362782,5_2362767,5_2362696,5_2362663,5_2362968,5_2362680	5.12e-105,1.1e-19,4.52e-15,3.08e-14,1.52e-12,3.94e-10,1.35e-09,1.71e-07,1.15e-05,0.00111,0.00233	0.281,0.0139,0.0187,0.0612,0.00768,0.0132,0.0171,0.0232,0.0319,0.00449,0.0112	19,3.99,4.13,16.4,3.68,13.5,5.29,14.9,13.3,2.82,13.2	T:C,T:C,T:C,T:C,T:C,T:C,T:C,T:C,T:C,T:C,T:C
AT4G17520	AT4G17520	+	AT4G17520.1	277.1232942	10	4_9773234,4_9773179,4_9773178,4_9773367,4_9773192,4_9773150,4_9773161,4_9772947,4_9773313,4_9773220	1.01e-104,1.31e-87,1.52e-48,3.16e-24,5.23e-08,1.04e-07,8.62e-07,0.00111,0.00494,0.0072	0.143,0.0807,0.0526,0.0411,0.00721,0.00544,0.00535,0.0021,0.00379,0.00292	5.12,6.47,5.06,6.58,5.13,5.01,4.85,12.8,3.77,3.72	A:G,A:G,A:G,A:G,A:G,A:G,A:G,A:G,A:G,A:G
AT1G49140	AT1G49140	-	AT1G49140.1,AT1G49140.2	488.3976798,0.5500778	9	1_18177717,1_18176948,1_18177705,1_18177708,1_18178007,1_18178124,1_18177699,1_18178006,1_18178055	3.4e-104,4.2e-26,2.36e-24,1.43e-09,5.74e-08,1.15e-05,0.00279,0.00589,0.00664	0.137,0.0298,0.0133,0.00625,0.006,0.00309,0.00248,0.00153,0.00139	4.55,16.7,15,4.45,5.18,3.89,3.92,3.79,3.76	T:C,T:C,T:C,T:C,T:C,T:C,T:C,T:C,T:C
AT4G29350	PRO2	+	AT4G29350.1	1499.6288488	7	4_14451097,4_14450195,4_14451144,4_14451143,4_14450207,4_14450256,4_14451040	5.53e-104,4.35e-18,2.11e-10,3.07e-07,5.15e-06,0.000204,0.00372	0.0278,0.00313,0.00283,0.00246,0.00149,0.000624,0.000747	5.23,3.18,15.2,4.11,2.02,3.51,3.09	A:G,A:G,A:G,A:G,A:G,A:G,A:G
AT2G39780	RNS2	+	AT2G39780.1,AT2G39780.2	122.1183704,0	11	2_16592559,2_16593501,2_16593622,2_16593286,2_16593585,2_16593315,2_16591809,2_16593580,2_16593303,2_16592897,2_16592898	5.67e-104,9.08e-18,5.21e-12,3.57e-07,6.56e-07,2.37e-05,4.22e-05,0.000162,0.00029,0.00037,0.000797	0.158,0.0433,0.0667,0.00836,0.0217,0.00774,0.00454,0.0145,0.0102,0.0041,0.00581	4.71,14.4,14.9,12.8,12.7,13.3,13.9,13.6,2.77,13.2,3.31	A:G,A:G,A:G,A:G,A:G,A:G,A:G,A:G,A:G,A:G,A:G
AT3G42050	VHA-H	-	AT3G42050.1	290.923717	26	3_14228650,3_14229915,3_14231873,3_14228553,3_14228651,3_14228705,3_14229228,3_14229940,3_14228602,3_14228610,3_14228913,3_14228910,3_14228759,3_14228588,3_14228604,3_14228890,3_14229370,3_14228872,3_14228946,3_14228905,3_14229884,3_14228928,3_14228863,3_14231613,3_14231128,3_14228978	1.4e-103,1.22e-48,4.24e-43,4.87e-41,2.6e-38,3.8e-24,2.78e-16,4.4e-15,2.82e-14,1.22e-12,6.25e-08,5.7e-07,4.79e-06,4.83e-06,3.27e-05,7.44e-05,8.71e-05,0.000113,0.000119,0.000284,0.00051,0.0014,0.0038,0.00387,0.00406,0.00837	0.182,0.0312,0.04,0.194,0.0785,0.0228,0.00945,0.011,0.038,0.0225,0.0032,0.00374,0.00342,0.0149,0.0109,0.0028,0.00223,0.00215,0.002,0.00172,0.00483,0.00228,0.00149,0.00338,0.00343,0.00234	17.6,6.04,2.97,16.9,16.2,6.56,4.6,5.99,15.1,14.4,15.3,4.03,13.6,13.8,13.3,3.18,13,4.36,14.3,14.5,3.35,3.24,3.85,2.72,3.55,2.97	T:C,T:C,T:C,T:C,T:C,T:C,T:C,T:C,T:C,T:C,T:C,T:C,T:C,T:C,T:C,T:C,T:C,T:C,T:C,T:C,T:C,T:C,T:C,T:C,T:C,T:C
AT2G23930	SNRNP-G	+	AT2G23930.1,AT2G23930.2	220.9733654,0.168245	8	2_10183158,2_10183157,2_10183198,2_10183091,2_10183093,2_10183076,2_10183130,2_10183156	2.3e-103,1e-47,7.19e-19,7.93e-16,4.52e-08,2.57e-05,3.24e-05,0.000318	0.25,0.111,0.139,0.0197,0.0106,0.00539,0.00893,0.0129	7.84,17.4,5.34,16.2,13.2,13.7,13,13.5	A:G,A:G,A:G,A:G,A:G,A:G,A:G,A:G
AT5G20020	RAN2	+	AT5G20020.1	434.5342924	23	5_6764142,5_6764242,5_6764174,5_6764393,5_6764149,5_6764394,5_6764089,5_6764091,5_6764064,5_6764145,5_6764344,5_6763545,5_6763535,5_6764188,5_6764439,5_6764392,5_6764179,5_6763411,5_6764185,5_6764146,5_6763557,5_6764191,5_6764200	6.46e-103,7.67e-72,3.87e-69,1.4e-40,6.68e-34,1.86e-26,9.36e-25,8.13e-22,4.4e-12,1.12e-11,5.84e-09,9.11e-07,9.2e-07,3.61e-06,8.5e-06,9.23e-05,9.51e-05,0.000131,0.000676,0.00088,0.000955,0.00165,0.00489	0.0461,0.0295,0.0234,0.0409,0.0704,0.0244,0.0073,0.00543,0.00338,0.00343,0.00571,0.00279,0.00215,0.00257,0.00788,0.00424,0.00139,0.00381,0.00166,0.00129,0.00119,0.00103,0.00126	4.03,5.23,5.54,6.3,2.33,15.8,5.09,16,14.9,15,4.32,3.98,14.3,3.42,14.1,13.9,14,2.63,3.32,4.06,12.4,12.2,3.89	A:G,A:G,A:G,A:G,A:G,A:G,A:G,A:G,A:G,A:G,A:G,A:G,A:G,A:G,A:G,A:G,A:G,A:G,A:G,A:G,A:G,A:G,A:G
AT3G44010	RPS29A	-	AT3G44010.2,AT3G44010.1	809.511527,0.4590248	3	3_15800146,3_15800028,3_15800027	2.26e-102,2.65e-05,0.000268	0.0466,0.0086,0.00997	4.87,4.52,2.74	T:C,T:C,T:C
AT3G52990	AT3G52990	+	AT3G52990.1,AT3G52990.2	165.8867958,0.0479434	14	3_19652192,3_19652191,3_19652236,3_19652097,3_19651167,3_19651095,3_19652114,3_19651327,3_19651383,3_19649711,3_19651927,3_19652161,3_19649082,3_19652360	5.94e-102,2.71e-85,6.64e-55,1.14e-37,2.29e-30,3.38e-20,5.33e-16,1.23e-12,1.52e-10,1e-09,1.02e-09,2.43e-09,0.000456,0.00132	0.106,0.105,0.0636,0.0376,0.0544,0.114,0.0181,0.0201,0.00903,0.0402,0.00698,0.00831,0.00424,0.00749	7.09,6.15,5.47,4.74,3.2,2.81,5.03,3.63,14.4,2.27,14.6,14.2,2.94,12.7	A:G,A:G,A:G,A:G,A:G,A:G,A:G,A:G,A:G,A:G,A:G,A:G,A:G,A:G
AT5G27850	RPL18C	+	AT5G27850.2,AT5G27850.1	714.381431,144.0640954	17	5_9874148,5_9874290,5_9874300,5_9874248,5_9873961,5_9873648,5_9874275,5_9873372,5_9873408,5_9874019,5_9873525,5_9874269,5_9873631,5_9873877,5_9873979,5_9873898,5_9873973	8.22e-102,2.53e-65,1.32e-47,2.33e-18,4.7e-18,3.12e-17,2.94e-15,2.8e-14,6.74e-11,4.79e-10,5.82e-08,5.55e-07,1.1e-05,7.39e-05,0.000183,0.000697,0.00172	0.0284,0.0335,0.0211,0.0122,0.00675,0.0149,0.0051,0.00603,0.0202,0.00239,0.0516,0.00219,0.00289,0.00247,0.00135,0.0122,0.00117	3.71,4.59,5.59,2.43,2.78,1.86,16,4.42,1.16,3.45,1.15,14.7,1.89,2.1,3.13,1.72,2.57	A:G,A:G,A:G,A:G,A:G,A:G,A:G,A:G,A:G,A:G,A:G,A:G,A:G,A:G,A:G,A:G,A:G
AT5G61170	RPS19C	+	AT5G61170.1	663.7551592	5	5_24612182,5_24612222,5_24611213,5_24612283,5_24611671	2.62e-101,2.72e-07,1.24e-06,3.59e-05,4.31e-05	0.0556,0.00306,0.00214,0.00317,0.0015	6.1,14.8,3.23,12.9,4.47	A:G,A:G,A:G,A:G,A:G
AT5G08680	AT5G08680	+	AT5G08680.1	360.9612628	14	5_2824831,5_2824137,5_2824666,5_2824658,5_2824127,5_2822400,5_2824674,5_2824626,5_2823876,5_2824605,5_2824682,5_2823729,5_2823594,5_2822928	3e-101,1.54e-48,5.53e-31,3.46e-20,5.11e-19,9.7e-14,7.47e-13,2.4e-08,3.6e-07,8.64e-07,1.19e-06,1.19e-06,0.000268,0.00348	0.172,0.0359,0.0169,0.0142,0.0138,0.0431,0.00676,0.00469,0.00491,0.00409,0.00478,0.00287,0.00257,0.00179	8.91,4.07,17.3,4.23,4.8,1.97,16.4,3.8,3.63,4.05,3.97,4,2.49,3.85	A:G,A:G,A:G,A:G,A:G,A:G,A:G,A:G,A:G,A:G,A:G,A:G,A:G,A:G
AT5G46020	AT5G46020	-	AT5G46020.1	167.3521908	9	5_18662994,5_18664566,5_18663388,5_18663019,5_18662997,5_18663875,5_18663256,5_18663718,5_18663938	3.52e-101,1.32e-50,9.75e-28,5.95e-20,1.56e-17,3.25e-09,4.85e-06,0.000366,0.0022	0.246,0.0622,0.0256,0.0447,0.0383,0.0111,0.0131,0.00452,0.00476	8.77,3.28,16.5,6.3,15.1,3.18,2.46,3.47,2.55	T:C,T:C,T:C,T:C,T:C,T:C,T:C,T:C,T:C
AT1G65290	MTACP2	-	AT1G65290.1	607.059557	30	1_24249114,1_24248976,1_24249080,1_24249040,1_24249079,1_24249027,1_24249026,1_24250216,1_24249205,1_24248979,1_24250300,1_24250384,1_24249085,1_24248935,1_24249087,1_24248969,1_24249077,1_24248893,1_24248970,1_24249081,1_24250338,1_24250165,1_24249232,1_24249241,1_24250250,1_24249020,1_24248937,1_24249140,1_24249127,1_24249038	4.7e-101,1.27e-76,5.68e-57,2.66e-33,4.95e-27,3.36e-26,5.12e-25,9.14e-23,1.06e-22,3.31e-19,1.58e-14,1.1e-11,1.25e-08,1.42e-08,3.95e-08,5.95e-08,2.67e-07,3.66e-05,8.26e-05,0.000113,0.000119,0.000336,0.000373,0.000395,0.000402,0.000498,0.000921,0.00219,0.00468,0.0082	0.0795,0.0658,0.0283,0.0206,0.462,0.0216,0.0185,0.00508,0.0106,0.0153,0.0058,0.0425,0.00363,0.0092,0.00493,0.00631,0.0035,0.0105,0.00698,0.00312,0.00367,0.00115,0.00162,0.00183,0.00204,0.00277,0.00485,0.00186,0.00137,0.00183	4.99,7.23,7.78,17.5,3.35,16.2,6.67,15.6,3.22,6.23,4.37,5.6,14.5,15,3.73,14.5,14,13.2,13.1,3.15,3.14,13.4,3.43,4.47,3.43,12.2,4.08,2.81,3.76,3.43	T:C,T:C,T:C,T:C,T:C,T:C,T:C,T:C,T:C,T:C,T:C,T:C,T:C,T:C,T:C,T:C,T:C,T:C,T:C,T:C,T:C,T:C,T:C,T:C,T:C,T:C,T:C,T:C,T:C,T:C
AT5G15320	AT5G15320	+	AT5G15320.1,AT5G15320.2	192.0664518,0.4925262	11	5_4978835,5_4978633,5_4978834,5_4978749,5_4978798,5_4978723,5_4978755,5_4978833,5_4978832,5_4978845,5_4977855	8.76e-101,2.18e-67,2.66e-37,8.64e-21,2.76e-14,5.44e-14,1.41e-08,1.81e-07,6.28e-06,0.000309,0.000327	0.333,0.0556,0.104,0.0224,0.0213,0.0104,0.00958,0.0205,0.016,0.0174,0.00287	8.87,6.41,16.6,15.7,16.2,15.6,14.4,14.1,13.7,4.18,13.8	A:G,A:G,A:G,A:G,A:G,A:G,A:G,A:G,A:G,A:G,A:G
AT1G74060	RPL6B	-	AT1G74060.1	275.4045748	16	1_27850034,1_27849986,1_27850004,1_27850163,1_27850147,1_27851054,1_27850105,1_27849987,1_27851059,1_27850421,1_27850387,1_27850159,1_27850103,1_27851236,1_27850148,1_27850098	9.48e-101,7.75e-45,9.32e-43,1.54e-21,1.69e-11,4.21e-10,5.25e-07,6.93e-06,0.000134,0.000324,0.000452,0.000713,0.00114,0.00146,0.00194,0.00794	0.104,0.0525,0.0422,0.0134,0.00803,0.00291,0.00526,0.00523,0.00137,0.00188,0.00184,0.00268,0.00238,0.00147,0.00248,0.00197	4.44,4.78,5.83,4.93,4.65,14.8,3.58,14.2,13.1,4.26,14.1,4.16,4.03,3.99,3.96,3.7	T:C,T:C,T:C,T:C,T:C,T:C,T:C,T:C,T:C,T:C,T:C,T:C,T:C,T:C,T:C,T:C
AT3G54640	TSA1	-	AT3G54640.1	133.5781708	5	3_20223346,3_20223348,3_20223433,3_20223347,3_20223365	1.11e-100,3.69e-16,4.87e-06,0.000951,0.00274	0.138,0.0196,0.0122,0.00479,0.00993	5.5,5.96,3.43,13.4,3.42	T:C,T:C,T:C,T:C,T:C
AT3G17810	PYD1	+	AT3G17810.1	204.1166166	5	3_6096310,3_6096391,3_6096429,3_6094733,3_6096426	1.77e-100,1.38e-35,5.77e-06,9.68e-06,0.00184	0.101,0.0486,0.00743,0.00748,0.00887	18,17.4,14.7,3.08,2.88	A:G,A:G,A:G,A:G,A:G
AT1G13440	GAPC2	-	AT1G13440.1,AT1G13440.2	1213.1333316,4.8971898	12	1_4608488,1_4608553,1_4608875,1_4608341,1_4609921,1_4609156,1_4609569,1_4608554,1_4608880,1_4608692,1_4609920,1_4609506	2.23e-100,1.58e-21,3.94e-07,1.79e-05,3.69e-05,0.000245,0.000388,0.000574,0.0021,0.00264,0.00647,0.0088	0.0225,0.00861,0.00276,0.00198,0.00188,0.00259,0.00194,0.00102,0.00172,0.00113,0.000883,0.000824	4.88,3.12,2.26,4.56,1.7,1.37,1.74,2.69,1.98,2.32,2.06,1.88	T:C,T:C,T:C,T:C,T:C,T:C,T:C,T:C,T:C,T:C,T:C,T:C
AT3G07568	AT3G07568	-	AT3G07568.1	139.861027	6	3_2416466,3_2417650,3_2416467,3_2416458,3_2417725,3_2417511	2.63e-100,5.35e-12,1.38e-10,3.69e-07,1.19e-05,3.57e-05	0.241,0.0173,0.0184,0.0131,0.0122,0.00744	6.44,13.9,5.44,14.5,13.4,4.48	T:C,T:C,T:C,T:C,T:C,T:C
AT5G03740	HDT3	+	AT5G03740.1	75.3712824	3	5_983985,5_984001,5_984061	2.68e-100,3.38e-13,0.000147	0.379,0.0451,0.0194	4.66,5.69,13.1	A:G,A:G,A:G
AT5G11200	RH15	+	AT5G11200.1,AT5G11200.2,AT5G11200.3	93.5243064,0.3793366,0.2203412	8	5_3570571,5_3570685,5_3570546,5_3570544,5_3568343,5_3570747,5_3570173,5_3568381	5.84e-100,1.92e-50,1.48e-23,6.46e-11,1.54e-06,0.00121,0.00177,0.00856	0.259,0.28,0.0331,0.347,0.0173,0.00902,0.00712,0.00688	4.15,3.4,17.3,2.36,3.5,13.6,3.99,3.6	A:G,A:G,A:G,A:G,A:G,A:G,A:G,A:G
AT5G36230	AT5G36230	+	AT5G36230.1,AT5G36230.2	165.6389944,0.9733372	16	5_14275208,5_14276083,5_14276504,5_14276858,5_14276832,5_14276005,5_14274953,5_14275095,5_14275258,5_14275249,5_14275094,5_14276581,5_14276406,5_14276479,5_14276429,5_14276498	1.08e-99,6.1e-87,1.34e-14,8.75e-09,1.16e-07,2.19e-07,2.76e-07,7.27e-07,1.93e-05,3.72e-05,5.4e-05,6.12e-05,0.000389,0.000555,0.00099,0.00147	0.214,0.0769,0.0164,0.0256,0.0149,0.00538,0.00828,0.0128,0.00859,0.00602,0.00995,0.00917,0.00282,0.00434,0.00412,0.00377	3.79,5.5,4.1,15.1,13.7,13.7,14.3,3.59,3.76,14.4,3.26,3.21,13.3,13.3,2.92,3.25	A:G,A:G,A:G,A:G,A:G,A:G,A:G,A:G,A:G,A:G,A:G,A:G,A:G,A:G,A:G,A:G
AT3G20050	CCT1	-	AT3G20050.1	188.1980376	6	3_6998505,3_6998432,3_6998958,3_6998598,3_6998962,3_6998469	1.19e-99,4.23e-88,4.25e-24,2.8e-06,0.000437,0.00098	0.185,0.179,0.0127,0.00533,0.00263,0.00683	3.93,8.49,14.8,14.1,13.1,4.07	T:C,T:C,T:C,T:C,T:C,T:C
AT1G30630	AT1G30630	-	AT1G30630.1	168.7040426	5	1_10858542,1_10859141,1_10859013,1_10860025,1_10859300	1.22e-99,5.47e-28,1.92e-12,6.68e-09,0.00106	0.176,0.0471,0.021,0.00453,0.00684	7.74,3.89,3.91,15.8,2.63	T:C,T:C,T:C,T:C,T:C
AT3G07560	PEX13	-	AT3G07560.1	110.2167662	9	3_2411600,3_2411444,3_2411497,3_2411612,3_2411422,3_2412393,3_2411421,3_2411551,3_2412723	2.07e-99,9.75e-64,3.07e-17,4.74e-10,1.92e-08,6.27e-07,3.21e-06,9.35e-06,4.44e-05	0.142,0.203,0.0436,0.0151,0.0285,0.0408,0.025,0.00959,0.00612	6.69,18.3,5.19,4.52,13.8,2.01,4.76,4.65,13.9	T:C,T:C,T:C,T:C,T:C,T:C,T:C,T:C,T:C
AT1G53310	PPC1	-	AT1G53310.2,AT1G53310.1,AT1G53310.3	138.3743474,18.457705,10.7513488	13	1_19884472,1_19884648,1_19884719,1_19884737,1_19884788,1_19886044,1_19884159,1_19884750,1_19885154,1_19887918,1_19884844,1_19884212,1_19885398	5.26e-99,1.53e-68,1.56e-58,1.44e-24,1.86e-13,9.17e-13,1.45e-09,6.81e-09,1.16e-05,0.000185,0.000206,0.000778,0.0061	0.111,0.117,0.0704,0.0362,0.0178,0.016,0.0188,0.0167,0.0054,0.00688,0.00396,0.00629,0.00387	4.12,3.26,4.37,2.34,4.02,3.52,14.1,2.89,3.79,2.8,13.8,12.5,3.05	T:C,T:C,T:C,T:C,T:C,T:C,T:C,T:C,T:C,T:C,T:C,T:C,T:C
AT5G64350	FKBP12	-	AT5G64350.1	1123.6068152	22	5_25735287,5_25734790,5_25735096,5_25735487,5_25734755,5_25735912,5_25734792,5_25734791,5_25734781,5_25735253,5_25734779,5_25734768,5_25735956,5_25734821,5_25735283,5_25734773,5_25734737,5_25734703,5_25734810,5_25735229,5_25735974,5_25734729	9.88e-99,1.99e-63,1.36e-35,5.06e-26,4.33e-23,1.01e-21,4.46e-19,6.76e-16,1.6e-14,1.26e-12,6.01e-08,1.33e-06,5.75e-06,1.45e-05,1.92e-05,2.64e-05,0.000106,0.000412,0.000472,0.00203,0.0026,0.0065	0.0944,0.024,0.00982,0.00672,0.0145,0.00862,0.0084,0.00705,0.00705,0.00281,0.00332,0.00285,0.00219,0.00172,0.00119,0.00308,0.00269,0.00373,0.00142,0.00256,0.00239,0.00249	3.4,7.94,4.39,3.94,4.17,4.93,5.34,5.1,14.6,4.89,15.4,14.2,3.42,4.59,3.31,3.3,13.2,13.1,4.18,2.28,2.91,3.76	T:C,T:C,T:C,T:C,T:C,T:C,T:C,T:C,T:C,T:C,T:C,T:C,T:C,T:C,T:C,T:C,T:C,T:C,T:C,T:C,T:C,T:C
AT1G13560	AAPT1	-	AT1G13560.1,AT1G13560.3,AT1G13560.2	58.0337088,0.0412292,0.0408464	6	1_4639127,1_4638988,1_4639649,1_4641087,1_4640261,1_4640939	2.47e-98,4.24e-36,2.94e-26,4.63e-09,0.000675,0.00427	0.463,0.0959,0.0589,0.0638,0.0185,0.0112	3.2,17.1,15.8,2.37,2.34,3.86	T:C,T:C,T:C,T:C,T:C,T:C
AT1G70770	AT1G70770	-	AT1G70770.1,AT1G70770.2	162.1662474,1.3836614	10	1_26688422,1_26688423,1_26688469,1_26689806,1_26688486,1_26689312,1_26688441,1_26688414,1_26688479,1_26689545	3.57e-98,2.98e-43,9.7e-22,8.49e-06,2.84e-05,0.000189,0.000368,0.000735,0.00157,0.00487	0.327,0.147,0.0528,0.00993,0.0136,0.00552,0.0149,0.0152,0.00775,0.00476	7.71,17.8,15.5,2.68,4.48,4.28,13.6,14.3,12.7,3.05	T:C,T:C,T:C,T:C,T:C,T:C,T:C,T:C,T:C,T:C
AT2G45670	LPEAT2	-	AT2G45670.1,AT2G45670.2	47.5495248,7.7995928	4	2_18815124,2_18815849,2_18815324,2_18815430	5.42e-98,1.3e-10,1.06e-05,4.12e-05	0.248,0.0893,0.0112,0.0117	5.3,2.75,4.61,3.29	T:C,T:C,T:C,T:C
AT2G02760	UBC2	+	AT2G02760.1,AT2G02760.4,AT2G02760.2,AT2G02760.3	84.8382266,0.9909468,0.8518368,0.5258576	4	2_775235,2_774653,2_774388,2_774313	5.68e-98,1.56e-15,1.67e-14,0.00404	0.276,0.0168,0.0169,0.0069	4.74,5.99,4.98,2.32	A:G,A:G,A:G,A:G
AT1G08360	RPL10AA	+	AT1G08360.1	452.4232802	17	1_2637660,1_2637109,1_2637739,1_2637624,1_2637247,1_2637494,1_2637565,1_2637495,1_2636755,1_2637462,1_2637654,1_2637163,1_2636674,1_2637627,1_2637807,1_2637522,1_2637160	7.03e-98,2.56e-83,2.72e-48,2.61e-46,2.63e-46,3.6e-32,2.66e-29,8.82e-21,8.05e-20,3.15e-12,4.92e-12,2.59e-09,4.64e-08,3.02e-05,0.000104,0.000199,0.00611	0.0695,0.043,0.0476,0.0236,0.0318,0.0246,0.0139,0.00884,0.00725,0.00611,0.00557,0.00428,0.00381,0.00401,0.0059,0.00529,0.00124	5.87,4.08,6.65,5.95,4.11,17.8,5.88,6.35,4.03,5.58,15.7,3.93,5.07,3.78,14.4,1.85,3.78	A:G,A:G,A:G,A:G,A:G,A:G,A:G,A:G,A:G,A:G,A:G,A:G,A:G,A:G,A:G,A:G,A:G
AT5G55190	RAN3	+	AT5G55190.1	308.6413634	19	5_22393956,5_22393770,5_22393961,5_22393296,5_22393463,5_22392457,5_22392993,5_22393953,5_22393924,5_22392829,5_22392832,5_22393964,5_22393557,5_22393531,5_22393551,5_22392800,5_22393916,5_22393005,5_22392813	2.53e-97,5.27e-42,2.28e-28,1.38e-27,3.08e-24,2.57e-23,1.67e-21,7.03e-17,2.84e-14,2.85e-12,3.39e-11,1.68e-09,2.33e-06,4.89e-06,1.37e-05,0.000113,0.000389,0.000421,0.00495	0.111,0.0344,0.0265,0.0603,0.0156,0.0777,0.0119,0.0136,0.0104,0.0673,0.0107,0.00893,0.00374,0.00296,0.00318,0.00248,0.00352,0.00378,0.0022	7.75,4.39,5.83,4.11,4.19,2.53,5.46,6.06,15.2,1.67,2.49,15.4,3.2,3.88,3.35,4.37,3.42,2.38,2.67	A:G,A:G,A:G,A:G,A:G,A:G,A:G,A:G,A:G,A:G,A:G,A:G,A:G,A:G,A:G,A:G,A:G,A:G,A:G
AT2G30980	ASK6	-	AT2G30980.1	63.125833	8	2_13182351,2_13182410,2_13182346,2_13182246,2_13182347,2_13184026,2_13182324,2_13182322	3.89e-97,8.38e-20,1.09e-19,8e-08,0.000229,0.000242,0.000306,0.00336	0.425,0.0543,0.0589,0.0385,0.0147,0.024,0.0126,0.0118	3.98,6.29,16.4,5.02,14.3,3.12,13.5,3.89	T:C,T:C,T:C,T:C,T:C,T:C,T:C,T:C
AT3G58730	VHA-D	-	AT3G58730.1	182.358	6	3_21718517,3_21718840,3_21718432,3_21718886,3_21718596,3_21718744	2.34e-96,6.87e-42,5.15e-18,7.24e-14,7.57e-10,0.00044	0.197,0.036,0.0347,0.0109,0.0127,0.00467	4.99,4.92,6.16,5.81,4.47,3.43	T:C,T:C,T:C,T:C,T:C,T:C
AT1G04850	AT1G04850	-	AT1G04850.1,AT1G04850.2	135.0454348,0.1128624	10	1_1365458,1_1365660,1_1365451,1_1365312,1_1366070,1_1368660,1_1365390,1_1367668,1_1365625,1_1365883	2.75e-96,4.87e-25,2.82e-14,3.66e-14,1.45e-10,6.4e-08,4.82e-07,6.17e-05,8.35e-05,0.000307	0.691,0.0334,0.0206,0.0385,0.0105,0.00744,0.0109,0.0112,0.00647,0.00425	2.71,6.61,14.7,5.82,14.6,5.02,13.2,3.61,14.9,13.9	T:C,T:C,T:C,T:C,T:C,T:C,T:C,T:C,T:C,T:C
AT4G17170	RABB1C	-	AT4G17170.1	143.6851386	1	4_9644877	6.61e-96	0.328	5.67	T:C
AT1G79075	AT1G79075	+	AT1G79075.1,AT1G79075.2	NA	5	1_29746683,1_29746676,1_29746782,1_29746692,1_29746682	1.22e-95,3.57e-35,2.34e-05,0.000167,0.000216	0.382,0.15,0.0176,0.0127,0.0138	7.15,18.2,12.5,13.4,13.6	A:G,A:G,A:G,A:G,A:G
AT5G49510	PFD3	+	AT5G49510.1,AT5G49510.2	36.3240998,30.4915184	6	5_20082092,5_20082115,5_20080777,5_20081938,5_20082470,5_20082491	1.3e-95,1.04e-23,2.93e-12,4.49e-06,0.000262,0.000738	0.325,0.0469,0.0455,0.0178,0.0139,0.0127	3.03,5.58,3.92,4.71,13.6,12.1	A:G,A:G,A:G,A:G,A:G,A:G
AT5G64130	AT5G64130	-	AT5G64130.1,AT5G64130.3,AT5G64130.2	397.1254658,0.7887236,0.2159484	13	5_25665106,5_25665151,5_25665148,5_25665316,5_25665154,5_25664819,5_25664983,5_25664984,5_25664518,5_25665156,5_25664425,5_25664519,5_25665371	3.87e-95,1.06e-92,4.45e-47,3.78e-42,2.36e-30,3.74e-18,2.51e-16,1.04e-09,1.07e-08,3.54e-06,0.000395,0.00367,0.00777	0.0344,0.0378,0.0224,0.0193,0.0127,0.00767,0.0058,0.00336,0.00886,0.00287,0.0272,0.00356,0.00174	5.66,4.88,5.08,3.71,5.05,5.33,4.62,5.38,5.24,3.47,3.47,3.94,14.5	T:C,T:C,T:C,T:C,T:C,T:C,T:C,T:C,T:C,T:C,T:C,T:C,T:C
AT1G79010	AT1G79010	-	AT1G79010.1	237.1415604	7	1_29725124,1_29725126,1_29725231,1_29725508,1_29726037,1_29725060,1_29725422	3.13e-94,2.13e-53,5.42e-16,1.45e-11,1.2e-09,1.14e-08,1.26e-06	0.156,0.752,0.0164,0.0117,0.00493,0.0145,0.00461	7.11,2.89,4.56,3.84,5.33,14.3,14.5	T:C,T:C,T:C,T:C,T:C,T:C,T:C
AT1G10950	TMN1	+	AT1G10950.1	110.1927168	3	1_3663690,1_3663687,1_3663692	9.65e-94,9.86e-24,5.59e-06	0.33,0.0842,0.0313	5.8,5.58,3.82	A:G,A:G,A:G
AT5G19780	TUBA5	+	AT5G19780.1	252.6249646	5	5_6689092,5_6688111,5_6688460,5_6687858,5_6688730	1.26e-93,6.63e-25,2.43e-09,0.000148,0.000203	0.224,0.0249,0.029,0.00251,0.00272	7.04,3.27,1.39,13.6,13.3	A:G,A:G,A:G,A:G,A:G
AT5G45620	RPN9A	+	AT5G45620.1,AT5G45620.2	54.7157348,0.1259484	6	5_18503829,5_18503797,5_18503692,5_18502961,5_18503757,5_18503751	1.46e-93,2.16e-36,4.23e-07,1.72e-05,0.000633,0.00117	0.344,0.152,0.0212,0.0259,0.0126,0.0145	6.04,15.8,4.87,2.76,13.4,3.28	A:G,A:G,A:G,A:G,A:G,A:G
AT4G34200	PGDH1	-	AT4G34200.1	273.7476786	15	4_16374048,4_16374042,4_16374109,4_16374093,4_16374110,4_16374090,4_16374147,4_16374303,4_16376565,4_16375632,4_16374049,4_16375633,4_16374143,4_16375679,4_16376336	2.29e-93,2.37e-38,1.25e-34,1.46e-19,2.9e-13,1.19e-09,4.56e-07,1.18e-05,0.000156,0.000251,0.000288,0.00185,0.00342,0.00427,0.0061	0.106,0.0413,0.0304,0.151,0.009,0.0131,0.0054,0.00872,0.0215,0.0028,0.00462,0.00325,0.00276,0.00243,0.00242	5.28,5.29,4.88,2.15,15,3.18,14.2,2.34,1.66,3.06,4.23,3,3.87,2.23,3.77	T:C,T:C,T:C,T:C,T:C,T:C,T:C,T:C,T:C,T:C,T:C,T:C,T:C,T:C,T:C
AT1G02780	RPL19A	-	AT1G02780.1	1625.6115108	13	1_608073,1_608274,1_608097,1_608108,1_608283,1_608261,1_608128,1_608110,1_608818,1_608640,1_608119,1_608588,1_608095	6.21e-93,4.14e-39,3.24e-31,2.45e-23,9.96e-14,1.56e-10,1.41e-09,3.16e-07,7.44e-07,6.11e-05,0.00069,0.000921,0.00392	0.0211,0.00713,0.00853,0.00526,0.00221,0.00205,0.00283,0.00376,0.00231,0.00398,0.000954,0.00142,0.000663	5.31,4.22,3.73,5.59,4.89,3.75,4.61,3.29,2.15,2.31,4.21,2,3.84	T:C,T:C,T:C,T:C,T:C,T:C,T:C,T:C,T:C,T:C,T:C,T:C,T:C
AT3G53110	RH38	+	AT3G53110.1	92.7414724	2	3_19690435,3_19687982	1.18e-92,0.000844	0.245,0.0127	8.61,4.12	A:G,A:G
AT1G09740	AT1G09740	+	AT1G09740.2,AT1G09740.1	427.5442832,8.5797624	8	1_3155332,1_3156120,1_3154994,1_3154745,1_3156104,1_3156044,1_3154982,1_3154936	1.65e-92,2.26e-57,2.29e-37,8.46e-37,1.44e-11,8.23e-10,3.51e-08,0.000571	0.11,0.0492,0.0247,0.0815,0.0111,0.00881,0.00365,0.00202	4.34,17.5,5.24,3.64,5.57,3.99,5.1,2.96	A:G,A:G,A:G,A:G,A:G,A:G,A:G,A:G
AT2G34470	UREG	-	AT2G34470.1,AT2G34470.2	129.5479078,2.9907604	24	2_14531381,2_14532208,2_14532395,2_14531392,2_14531380,2_14531171,2_14531393,2_14530957,2_14531351,2_14530869,2_14531356,2_14532116,2_14530870,2_14532246,2_14531364,2_14532146,2_14532167,2_14531538,2_14530855,2_14530979,2_14532223,2_14530927,2_14531347,2_14532247	2.35e-92,3.98e-42,1.74e-39,1.67e-32,1.28e-27,1.92e-23,5.71e-22,4.66e-19,2.23e-15,5.74e-13,1.42e-12,9.49e-12,8.52e-11,1.86e-06,1.39e-05,0.00016,0.000207,0.000221,0.000316,0.000357,0.000528,0.000796,0.00111,0.00327	0.125,0.0737,0.137,0.0723,0.361,0.103,0.516,0.0331,0.265,0.0298,0.0166,0.0111,0.0238,0.0165,0.00627,0.00551,0.00589,0.00456,0.0116,0.00534,0.0126,0.00602,0.00519,0.00691	7.53,5.39,4.6,6.08,2.45,3.67,1.66,14.8,3.14,15.3,5.65,14.7,14.3,4.75,14.4,4.29,4.26,13.4,13.3,14.2,4.18,12.4,4.04,13.1	T:C,T:C,T:C,T:C,T:C,T:C,T:C,T:C,T:C,T:C,T:C,T:C,T:C,T:C,T:C,T:C,T:C,T:C,T:C,T:C,T:C,T:C,T:C,T:C
AT3G60210	AT3G60210	-	AT3G60210.1	49.289263	4	3_22251333,3_22252337,3_22251730,3_22252340	2.4e-92,3e-32,2.08e-26,0.000897	0.521,0.071,0.11,0.0083	18.4,4.58,4.57,12.8	T:C,T:C,T:C,T:C
AT3G13920	TIF4A-1	-	AT3G13920.1,AT3G13920.3,AT3G13920.2,AT3G13920.5,AT3G13920.4	423.2187376,0.4312404,0.3133526,0.3088964,0.135655	4	3_4592551,3_4592570,3_4593388,3_4592989	1.27e-91,7.06e-39,6.65e-06,0.00328	0.0518,0.0249,0.00725,0.0036	5.05,6.46,1.54,1.94	T:C,T:C,T:C,T:C
AT2G31570	GPX2	-	AT2G31570.1	488.6557524	2	2_13438196,2_13438199	1.38e-91,8.88e-79	0.0867,0.0623	6.27,6.31	T:C,T:C
AT1G07940	A3	-	AT1G07940.1,AT1G07940.2,AT1G07940.4,AT1G07940.3	715.9694304,5.783206,2.1466402,1.7060572	9	1_2463255,1_2463408,1_2463225,1_2463199,1_2463316,1_2463287,1_2463284,1_2463535,1_2463457	1.39e-91,9.23e-80,1.63e-53,3.68e-19,4.23e-09,5.95e-05,6.29e-05,0.000114,0.000211	0.0609,0.0379,0.0298,0.00939,0.135,0.00268,0.00193,0.00323,0.00308	5.98,5.24,7.7,15.1,1.77,3.64,13.6,2.52,2.44	T:C,T:C,T:C,T:C,T:C,T:C,T:C,T:C,T:C
AT2G30410	TFCA	+	AT2G30410.3,AT2G30410.2,AT2G30410.1	103.1961898,1.5700138,0.9434434	4	2_12960556,2_12959904,2_12959868,2_12960177	1.44e-91,6.01e-08,0.000122,0.000294	0.298,0.0228,0.00684,0.00672	8.75,3.17,12.5,13.2	A:G,A:G,A:G,A:G
AT1G14450	AT1G14450	-	AT1G14450.1,AT1G14450.2	443.9391194,0.4447152	20	1_4946347,1_4946299,1_4946321,1_4947410,1_4946480,1_4947358,1_4947336,1_4946479,1_4946391,1_4946468,1_4947379,1_4946326,1_4946469,1_4946457,1_4947397,1_4946281,1_4946392,1_4946348,1_4946334,1_4946369	9.05e-91,1.38e-56,8.21e-45,5.14e-32,5.2e-25,1.84e-24,2.11e-24,2.5e-23,1.19e-22,1.02e-19,1.62e-16,6.65e-12,1.45e-11,7.49e-08,2.72e-07,7.91e-06,3.87e-05,0.000344,0.00036,0.00295	0.166,0.288,0.124,0.0156,0.0138,0.015,0.0154,0.013,0.0308,0.0157,0.00965,0.0286,0.0121,0.00945,0.00276,0.058,0.00556,0.00688,0.00851,0.00593	17.5,5,17,4.25,6.63,5.67,15.8,6.53,5.6,15.8,4.29,14.8,3.97,5.23,14.2,14.3,14.4,12.7,13,3.22	T:C,T:C,T:C,T:C,T:C,T:C,T:C,T:C,T:C,T:C,T:C,T:C,T:C,T:C,T:C,T:C,T:C,T:C,T:C,T:C
AT1G04410	MDH1	-	AT1G04410.1	1639.9319872	26	1_1189449,1_1189419,1_1189489,1_1189483,1_1189446,1_1189417,1_1189485,1_1189451,1_1189456,1_1189455,1_1189370,1_1190261,1_1189342,1_1189659,1_1189471,1_1189151,1_1189891,1_1189918,1_1189852,1_1189709,1_1190505,1_1189407,1_1189813,1_1190584,1_1189602,1_1190514	1.22e-90,1.25e-73,1.17e-32,8.49e-30,1.47e-26,1.5e-26,2.78e-22,2.28e-10,7.86e-08,8.49e-08,5.49e-05,5.58e-05,0.000112,0.000168,0.000185,0.000268,0.000376,0.000422,0.000503,0.000961,0.00101,0.00184,0.00235,0.00291,0.00753,0.00994	0.0157,0.014,0.0326,0.0064,0.00808,0.00616,0.00413,0.00216,0.00175,0.00226,0.00139,0.00156,0.00158,0.00172,0.00124,0.0168,0.0016,0.00101,0.00101,0.000837,0.00155,0.00123,0.000838,0.00144,0.000747,0.00078	17.6,18.9,3.65,3.63,3.8,5.78,4.65,4.06,3.44,2.73,4.5,1.71,3.58,1.64,2.65,12.5,1.68,2.14,2.14,3.51,1.56,3.19,2.54,1.8,2.71,3.09	T:C,T:C,T:C,T:C,T:C,T:C,T:C,T:C,T:C,T:C,T:C,T:C,T:C,T:C,T:C,T:C,T:C,T:C,T:C,T:C,T:C,T:C,T:C,T:C,T:C,T:C
AT2G32730	RPN2A	+	AT2G32730.1	78.1988796	12	2_13885529,2_13884822,2_13885530,2_13885272,2_13883467,2_13884596,2_13885528,2_13880911,2_13885375,2_13884823,2_13884206,2_13885411	1.8e-90,1.87e-34,4.8e-29,1.32e-20,2.81e-10,3.82e-05,0.000133,0.000193,0.000314,0.000871,0.00107,0.00209	0.572,0.0804,0.183,0.0304,0.0274,0.00583,0.0289,0.0142,0.00823,0.00663,0.0108,0.00815	18.7,4.89,6.9,6.31,2.37,13.7,13.3,4.31,4.22,13.1,4.09,3.94	A:G,A:G,A:G,A:G,A:G,A:G,A:G,A:G,A:G,A:G,A:G,A:G
AT3G11510	RPS14B	-	AT3G11510.1	608.4694134	16	3_3623681,3_3624542,3_3623686,3_3624175,3_3624159,3_3624202,3_3623991,3_3623752,3_3623995,3_3623938,3_3623992,3_3623728,3_3624543,3_3623996,3_3624208,3_3623934	3.01e-90,7.85e-41,1.33e-16,1.95e-14,4.55e-14,2.66e-11,2.74e-11,1.55e-09,3.87e-09,4.39e-08,1.19e-07,4.06e-06,2.14e-05,0.000242,0.00119,0.00887	0.0788,0.041,0.00979,0.00434,0.0617,0.235,0.0282,0.0051,0.0026,0.00411,0.00183,0.00427,0.00378,0.00185,0.00195,0.00172	4.57,3.02,15.1,4.45,2.04,1.3,2.69,4.42,5.24,3.06,13,4.65,4.6,3.47,3.04,2.59	T:C,T:C,T:C,T:C,T:C,T:C,T:C,T:C,T:C,T:C,T:C,T:C,T:C,T:C,T:C,T:C
AT5G49650	XK-2	+	AT5G49650.1,AT5G49650.2	19.7188652,12.1758396	6	5_20155475,5_20155476,5_20155503,5_20153848,5_20154235,5_20153988	3.39e-90,5.43e-64,1.29e-07,2.25e-05,4.84e-05,0.000576	0.442,0.318,0.05,0.0149,0.0128,0.0112	5.47,6.1,14.1,14.3,13.6,13.9	A:G,A:G,A:G,A:G,A:G,A:G
AT1G20260	VHA-B3	+	AT1G20260.1	200.7970172	19	1_7020331,1_7020172,1_7020366,1_7019491,1_7020240,1_7020326,1_7020383,1_7019656,1_7020300,1_7018121,1_7020384,1_7020251,1_7018073,1_7020252,1_7020364,1_7019326,1_7018077,1_7020285,1_7018419	4.56e-90,2.9e-72,6.72e-60,2.27e-58,1.74e-38,1.45e-17,2.14e-14,6.27e-13,1.4e-12,2.84e-10,1.5e-07,3.22e-07,5.96e-07,3.53e-06,7.19e-06,4.02e-05,6.27e-05,0.000849,0.000884	0.137,0.06,0.0756,0.0426,0.0329,0.0233,0.0195,0.00746,0.0141,0.0105,0.0103,0.00602,0.00495,0.00521,0.00699,0.00265,0.0054,0.00682,0.00549	19.1,5.91,17.2,5.58,7.23,4.35,14.1,16.6,14.2,3.75,13.2,13.9,4.91,12.8,12.6,15.1,3.8,2.92,4.3	A:G,A:G,A:G,A:G,A:G,A:G,A:G,A:G,A:G,A:G,A:G,A:G,A:G,A:G,A:G,A:G,A:G,A:G,A:G
AT2G28910	CXIP4	-	AT2G28910.1,AT2G28910.2,AT2G28910.3	210.5611022,0.506154,0.2638364	41	2_12416299,2_12416212,2_12416603,2_12416237,2_12416371,2_12416011,2_12416395,2_12416271,2_12416303,2_12416112,2_12416308,2_12416399,2_12416213,2_12415993,2_12416282,2_12416300,2_12416216,2_12416574,2_12416374,2_12417352,2_12416138,2_12416579,2_12416601,2_12416266,2_12416131,2_12416994,2_12416315,2_12416480,2_12416281,2_12416618,2_12416045,2_12415887,2_12416277,2_12416740,2_12416393,2_12415988,2_1…	6.32e-90,8.99e-81,3.48e-75,3.62e-66,7.28e-58,6.34e-57,1.32e-47,3.69e-42,1.84e-38,1.86e-35,1.71e-27,1.37e-26,5.41e-22,7.09e-19,1.8e-18,4.45e-16,1.62e-14,3.27e-10,4.63e-10,2.26e-09,1.25e-08,5.8e-08,8.89e-08,1.77e-07,1.78e-07,3.67e-07,3.69e-07,5.21e-07,4.94e-06,9.32e-06,1.31e-05,1.83e-05,2.49e-05,8.89e-05,0.000203,6e-04,0.00112,0.00122,0.00375,0.00657,0.00701	0.0632,0.0424,0.0871,0.047,0.0521,0.116,0.0314,0.0337,0.0305,0.0191,0.0165,0.0249,0.0162,0.021,0.0145,0.0121,0.00994,0.00864,0.00482,0.0642,0.00496,0.00949,0.00906,0.00377,0.00413,0.00771,0.00624,0.00655,0.00603,0.0055,0.00492,0.0129,0.00621,0.00642,0.00384,0.00772,0.00215,0.005,0.00433,0.00395,0.00177	5.44,8.32,4.89,4.33,4.19,4.65,4.59,4.63,6.22,7.1,5.28,3.59,3.67,15.7,3.73,3.99,4.96,15.4,15.6,5.22,5.14,3.75,4.2,4.99,14.3,4.92,4.14,3.59,2.57,14.3,4.6,13.5,2.13,3.18,3.15,3.37,4.09,3.28,2.3,3.03,3.85	T:C,T:C,T:C,T:C,T:C,T:C,T:C,T:C,T:C,T:C,T:C,T:C,T:C,T:C,T:C,T:C,T:C,T:C,T:C,T:C,T:C,T:C,T:C,T:C,T:C,T:C,T:C,T:C,T:C,T:C,T:C,T:C,T:C,T:C,T:C,T:C,T:C,T:C,T:C,T:C,T:C
AT5G47120	BI-1	+	AT5G47120.1	201.321551	9	5_19137644,5_19137600,5_19137732,5_19137358,5_19137671,5_19137640,5_19137124,5_19137690,5_19137816	8.36e-90,6.66e-33,6.83e-25,7.71e-15,1.54e-10,8.29e-08,0.000113,0.000322,0.000356	0.125,0.0213,0.0436,0.0172,0.011,0.00624,0.00401,0.00544,0.0172	5.79,16.2,15.9,3.41,5.42,13,13.3,12.8,12.4	A:G,A:G,A:G,A:G,A:G,A:G,A:G,A:G,A:G
AT1G15930	RPS12A	+	AT1G15930.2,AT1G15930.1	579.7117794,18.061899	22	1_5472184,1_5472700,1_5472740,1_5472369,1_5472697,1_5472712,1_5472821,1_5472722,1_5472721,1_5472290,1_5472199,1_5472259,1_5472727,1_5472554,1_5472200,1_5472847,1_5472584,1_5472252,1_5472272,1_5472389,1_5472763,1_5472246	1.04e-89,3.78e-77,3.7e-64,7.16e-32,3.29e-24,1.03e-12,3.81e-11,6.29e-10,3.6e-09,5.65e-09,1.39e-08,3.14e-07,7.84e-07,1.16e-06,4.01e-06,8.74e-06,1.8e-05,5.2e-05,0.000109,0.00116,0.00377,0.0049	0.0383,0.0279,0.0417,0.0123,0.0105,0.00505,0.0118,0.00516,0.00302,0.00333,0.00302,0.00235,0.00264,0.00291,0.00175,0.00718,0.00173,0.00175,0.00193,0.00148,0.00269,0.000845	3.02,7.24,5.72,3.08,4.23,4.78,15.3,4.5,14.8,2.64,14.8,3.62,13.2,3.26,4.71,4.63,4.56,3.48,2.46,3.17,2.33,3.78	A:G,A:G,A:G,A:G,A:G,A:G,A:G,A:G,A:G,A:G,A:G,A:G,A:G,A:G,A:G,A:G,A:G,A:G,A:G,A:G,A:G,A:G
AT5G28050	AT5G28050	-	AT5G28050.1,AT5G28050.2,AT5G28050.3	240.6354514,1.2360628,0.181814	2	5_10044140,5_10044143	1.5e-89,9.77e-21	0.125,0.0268	6.53,6.35	T:C,T:C
AT5G12140	CYS1	-	AT5G12140.1	337.3893076	9	5_3923142,5_3923821,5_3923329,5_3923169,5_3923145,5_3922955,5_3923825,5_3923314,5_3923147	2.23e-89,2.99e-57,1.87e-22,1.02e-20,4.3e-10,8.76e-05,0.000192,0.00129,0.00261	0.57,0.0222,0.00765,0.0137,0.00632,0.0692,0.00142,0.00167,0.00345	3.32,3.66,6.47,15,13.9,4.36,4.39,12.5,2.85	T:C,T:C,T:C,T:C,T:C,T:C,T:C,T:C,T:C
AT4G22310	MPC4	+	AT4G22310.1	213.4805858	16	4_11792671,4_11791933,4_11792730,4_11792410,4_11792666,4_11792651,4_11792664,4_11792729,4_11791477,4_11792711,4_11792715,4_11792700,4_11792665,4_11792192,4_11791982,4_11792177	6.88e-89,2.05e-20,4.02e-18,1.56e-16,5.99e-15,3.07e-12,1.18e-11,8.19e-10,1.01e-07,1.07e-07,2.27e-07,4.55e-05,0.000157,0.000161,0.00153,0.00385	0.142,0.0491,0.0334,0.00939,0.0188,0.0143,0.0142,0.0162,0.00645,0.011,0.0106,0.00925,0.00585,0.00227,0.00144,0.00185	7.5,2.14,6.16,6.19,14,13.6,13.6,14.4,3.36,13.3,13.8,12.9,12.3,14.4,14.1,3.08	A:G,A:G,A:G,A:G,A:G,A:G,A:G,A:G,A:G,A:G,A:G,A:G,A:G,A:G,A:G,A:G
AT1G10290	DRP2A	+	AT1G10290.1	53.7691486	3	1_3377049,1_3376881,1_3377053	1.69e-88,6.21e-06,0.000106	0.289,0.0248,0.0134	5.53,3.85,14.1	A:G,A:G,A:G
AT4G02580	AT4G02580	+	AT4G02580.1	237.0563222	22	4_1136987,4_1136967,4_1136959,4_1136592,4_1136851,4_1136952,4_1135835,4_1136957,4_1136855,4_1136809,4_1137112,4_1136907,4_1135833,4_1137014,4_1136014,4_1137103,4_1136582,4_1136946,4_1136594,4_1135627,4_1135894,4_1136001	1.92e-88,5.14e-87,1.95e-30,4.54e-28,2.91e-13,1.26e-11,1.52e-11,2.61e-11,1.56e-09,1.58e-08,2.28e-07,3.94e-06,9.19e-06,2.17e-05,2.75e-05,0.000107,0.000115,0.000186,0.00127,0.00245,0.00312,0.00505	0.137,0.0987,0.0473,0.0218,0.0104,0.0118,0.00827,0.0117,0.00818,0.00794,0.0565,0.00473,0.00692,0.0101,0.0105,0.0327,0.00412,0.0044,0.00422,0.00359,0.00356,0.00284	17.1,18,17.4,4.91,15.2,14.8,5.57,14.8,5.32,3.51,14.9,13.5,3.91,3.64,2.74,13.5,3.66,13.4,2.61,3.25,3.97,3.82	A:G,A:G,A:G,A:G,A:G,A:G,A:G,A:G,A:G,A:G,A:G,A:G,A:G,A:G,A:G,A:G,A:G,A:G,A:G,A:G,A:G,A:G
AT1G79230	STR1	+	AT1G79230.1,AT1G79230.3,AT1G79230.2	124.234766,0.6625912,0.2714794	22	1_29803655,1_29803700,1_29802373,1_29801289,1_29802375,1_29803329,1_29803811,1_29803764,1_29802688,1_29802436,1_29803693,1_29803695,1_29802950,1_29803877,1_29803878,1_29801799,1_29803448,1_29802374,1_29803744,1_29803715,1_29802183,1_29803787	2.79e-88,1.36e-43,1.37e-18,2.06e-16,1.22e-13,5.48e-12,1.03e-11,1.64e-11,1.41e-09,1.18e-08,2.24e-08,6.29e-08,1.25e-07,3.63e-07,3.86e-07,7.46e-07,1.28e-06,5.34e-05,0.000156,0.000635,0.00155,0.002	0.101,0.072,0.0251,0.0456,0.0217,0.0178,0.0435,0.0198,0.0106,0.00873,0.00912,0.0105,0.00626,0.0412,0.0355,0.0108,0.0086,0.00542,0.0071,0.00581,0.0359,0.00809	18.6,5.49,4.75,2,4.02,3.92,13.8,14.7,3.64,4.3,15,5.06,14.5,13.7,14.1,13.8,4.85,14.3,13.2,12.3,2.85,12.8	A:G,A:G,A:G,A:G,A:G,A:G,A:G,A:G,A:G,A:G,A:G,A:G,A:G,A:G,A:G,A:G,A:G,A:G,A:G,A:G,A:G,A:G
AT5G28060	RPS24B	-	AT5G28060.1	620.6923866	28	5_10070309,5_10069771,5_10069937,5_10070260,5_10069792,5_10070317,5_10069717,5_10069772,5_10069781,5_10069801,5_10069660,5_10069791,5_10070316,5_10070259,5_10069919,5_10070744,5_10069975,5_10069795,5_10070220,5_10069969,5_10069773,5_10070437,5_10070254,5_10070310,5_10070453,5_10070173,5_10069798,5_10070438	3e-88,7.81e-77,8.42e-47,4.05e-43,2.09e-38,7.58e-26,6.27e-20,1.37e-16,8.96e-14,7.14e-13,3.35e-11,4.85e-11,9.01e-09,9.35e-09,1.33e-07,1.35e-07,5.79e-07,2.18e-06,5.84e-05,9.66e-05,0.000271,0.000498,0.000835,0.000846,0.0033,0.00428,0.00486,0.00522	0.0396,0.0343,0.0182,0.0118,0.0292,0.126,0.764,0.00709,0.00576,0.00468,0.0121,0.00488,0.00725,0.00453,0.00225,0.00393,0.00281,0.00398,0.00136,0.0014,0.00226,0.00286,0.00168,0.00135,0.00159,0.000999,0.00169,0.00123	4.92,6.67,4.87,6.41,5.14,2.21,2.01,16.5,5.78,5.69,15.4,4.61,3.42,2.58,14.4,3.15,4.02,4.86,4.35,4.39,4.22,2.86,2.66,4.01,3.44,3.11,3.17,3.41	T:C,T:C,T:C,T:C,T:C,T:C,T:C,T:C,T:C,T:C,T:C,T:C,T:C,T:C,T:C,T:C,T:C,T:C,T:C,T:C,T:C,T:C,T:C,T:C,T:C,T:C,T:C,T:C
AT2G44350	CSY4	+	AT2G44350.1,AT2G44350.2,AT2G44350.4,AT2G44350.3	247.985968,6.4934316,5.6795516,0.5319392	13	2_18320159,2_18319935,2_18320181,2_18320595,2_18320572,2_18320305,2_18318900,2_18320504,2_18320469,2_18319031,2_18317842,2_18318078,2_18317860	3.11e-88,2.35e-28,1.89e-25,7.86e-22,1.04e-12,1.43e-12,4.08e-09,1.57e-07,5.11e-07,4.7e-06,2.76e-05,5.01e-05,0.000122	0.0726,0.0209,0.0206,0.0315,0.0164,0.0117,0.0112,0.00523,0.0046,0.107,0.00323,0.00361,0.0024	5.72,5.28,4.28,14.8,15.3,15.3,4.36,13.6,14,1.27,3.71,3.68,4.35	A:G,A:G,A:G,A:G,A:G,A:G,A:G,A:G,A:G,A:G,A:G,A:G,A:G
AT3G63460	SEC31B	-	AT3G63460.1,AT3G63460.2,AT3G63460.3	81.816279,14.0503908,0	9	3_23433641,3_23433336,3_23432588,3_23432988,3_23431099,3_23431666,3_23431021,3_23431956,3_23431240	3.45e-88,8.85e-65,1.37e-33,1.8e-19,7.43e-16,1.18e-07,1.01e-06,2.06e-05,0.00746	0.101,0.0977,0.0762,0.228,0.0287,0.0155,0.0103,0.0103,0.00512	4.95,4.2,5.14,1.99,14.6,3.67,13.1,13.2,2.93	T:C,T:C,T:C,T:C,T:C,T:C,T:C,T:C,T:C
AT4G33360	FLDH	-	AT4G33360.1,AT4G33360.2,AT4G33360.3	152.325581,0.7614604,0.1741524	16	4_16067956,4_16068049,4_16068073,4_16068367,4_16068401,4_16067967,4_16068065,4_16068927,4_16068418,4_16068047,4_16068063,4_16068417,4_16068761,4_16068402,4_16068752,4_16068233	5.16e-88,1.02e-59,8.64e-29,1.43e-19,1.09e-16,8.67e-16,5.24e-09,5.94e-08,1.67e-07,5.91e-06,0.000248,0.000723,0.0013,0.00142,0.00297,0.00697	0.18,0.0582,0.0311,0.0149,0.0213,0.0272,0.0125,0.0247,0.00718,0.00659,0.00418,0.00671,0.00926,0.00299,0.00625,0.00459	6.17,16.3,5.85,6.25,3.61,14.6,3.56,2.24,14.1,14.9,13.3,2.92,3.25,13.4,3.09,1.99	T:C,T:C,T:C,T:C,T:C,T:C,T:C,T:C,T:C,T:C,T:C,T:C,T:C,T:C,T:C,T:C
AT5G23540	RPN11	+	AT5G23540.1,AT5G23540.2	223.176621,0.2503362	3	5_7939338,5_7937785,5_7939278	6.4e-88,0.000102,0.00231	0.165,0.00884,0.0035	4.08,2.86,3.86	A:G,A:G,A:G
AT3G46830	RABA2C	-	AT3G46830.1,AT3G46830.2	51.8382444,18.7443234	2	3_17246758,3_17246658	7.93e-88,1.11e-16	0.189,0.0428	8.49,6.03	T:C,T:C
AT4G34265	AT4G34265	+	AT4G34265.2,AT4G34265.1,AT4G34265.4,AT4G34265.6,AT4G34265.3,AT4G34265.5	41.2172224,26.55282,4.2150684,3.857281,3.1471212,0.6749926	8	4_16403457,4_16403515,4_16403766,4_16403004,4_16402661,4_16402687,4_16402968,4_16402384	9.38e-88,2.32e-25,1.88e-12,2.5e-09,2.23e-08,1.17e-07,2.05e-07,0.000189	0.166,0.067,0.308,0.0451,0.00851,0.0108,0.0357,0.0114	4.61,16.9,14.2,13.9,13.4,4.14,4.98,4.29	A:G,A:G,A:G,A:G,A:G,A:G,A:G,A:G
AT2G20820	AT2G20820	+	AT2G20820.1,AT2G20820.2	465.0952624,7.1533054	15	2_8965049,2_8965048,2_8965052,2_8965050,2_8965051,2_8964532,2_8965047,2_8964843,2_8964869,2_8965202,2_8964845,2_8965020,2_8965163,2_8965365,2_8965350	1.04e-87,5.21e-86,1.36e-56,1.45e-30,2.87e-19,2.53e-18,3.47e-14,4.9e-14,5.37e-10,9.15e-10,1.67e-08,1.02e-06,2.42e-05,0.000324,0.00109	0.19,0.0389,0.0214,0.0709,0.00659,0.00665,0.00491,0.0052,0.00507,0.00428,0.00287,0.00195,0.0022,0.0109,0.0126	3.22,7.58,5.3,2.56,5.32,5.33,4.94,4.07,3.68,15.7,4.29,12.8,4.54,13.8,13.3	A:G,A:G,A:G,A:G,A:G,A:G,A:G,A:G,A:G,A:G,A:G,A:G,A:G,A:G,A:G
AT1G67730	KCR1	+	AT1G67730.1	87.577227	4	1_25393359,1_25393235,1_25391967,1_25393358	3.38e-87,7.33e-10,2.22e-08,5.66e-05	0.227,0.0269,0.0179,0.0103	5.12,2.75,2.7,13.2	A:G,A:G,A:G,A:G
AT3G12260	AT3G12260	-	AT3G12260.1	416.5836074	10	3_3909177,3_3909271,3_3910285,3_3909281,3_3909175,3_3909310,3_3909238,3_3909432,3_3909069,3_3909370	1.32e-86,3.29e-33,4.04e-22,1.95e-20,2.64e-11,6.67e-11,1.55e-06,6.54e-05,0.000857,0.00843	0.137,0.034,0.012,0.0185,0.0249,0.00881,0.00682,0.00197,0.00964,0.00201	8.57,7.03,5.44,16.5,5.61,14.4,14,13.2,13.1,14.7	T:C,T:C,T:C,T:C,T:C,T:C,T:C,T:C,T:C,T:C
AT2G21170	TIM	-	AT2G21170.1,AT2G21170.2,AT2G21170.3	202.4229438,2.3974024,0.1723632	28	2_9071668,2_9071030,2_9071661,2_9071018,2_9071063,2_9071895,2_9071619,2_9072913,2_9072487,2_9071418,2_9071832,2_9071833,2_9071228,2_9071427,2_9071476,2_9071059,2_9071664,2_9072383,2_9071725,2_9072075,2_9071834,2_9070866,2_9072341,2_9072166,2_9071061,2_9071721,2_9071231,2_9072071	1.97e-86,1.42e-82,1.73e-75,1.37e-70,1.02e-38,1.49e-37,1.07e-35,3.29e-34,2.8e-33,1.72e-30,5.27e-24,4.94e-22,6.19e-14,7.99e-14,2.2e-12,7.37e-11,6.87e-10,2.09e-09,1.43e-08,2.28e-08,3.24e-08,1.37e-06,6.36e-06,1.25e-05,4.5e-05,0.000197,0.000405,0.00305	0.122,0.0878,0.0746,0.0865,0.0399,0.0461,0.0373,0.0376,0.0446,0.0287,0.0293,0.0236,0.0126,0.0119,0.00812,0.011,0.00928,0.00639,0.0105,0.0124,0.00606,0.0303,0.00344,0.00642,0.00506,0.00336,0.00462,0.00368	3.08,7.37,4.81,6.56,17.2,4.6,4.02,3.73,2.69,5.43,3.38,4.33,3.82,3.81,15.3,5.47,4.48,5.3,3.53,2.79,13.9,13.3,13.6,2.86,4.48,14,3,3.17	T:C,T:C,T:C,T:C,T:C,T:C,T:C,T:C,T:C,T:C,T:C,T:C,T:C,T:C,T:C,T:C,T:C,T:C,T:C,T:C,T:C,T:C,T:C,T:C,T:C,T:C,T:C,T:C
AT3G11630	BAS1	+	AT3G11630.1	140.2459972	8	3_3673945,3_3673986,3_3673959,3_3673957,3_3673958,3_3673928,3_3673932,3_3673936	6.49e-86,8.06e-83,3.39e-57,1.25e-33,5.95e-13,4.36e-10,9.39e-06,3.08e-05	0.284,0.203,0.157,0.0745,0.0349,0.0196,0.0156,0.00965	6.61,17.8,5.59,6.11,15,14.1,13.7,13.1	A:G,A:G,A:G,A:G,A:G,A:G,A:G,A:G
AT1G30580	AT1G30580	-	AT1G30580.1	241.0684404	10	1_10831883,1_10831808,1_10831884,1_10832038,1_10831869,1_10832276,1_10834972,1_10832040,1_10832291,1_10833847	7.65e-85,2.61e-70,2.07e-40,9.81e-31,5.79e-08,1.41e-07,2.45e-05,0.000443,0.00158,0.00201	0.148,0.167,0.706,0.0166,0.00924,0.00452,0.00667,0.00253,0.00346,0.00441	7.54,7.22,3.14,16.2,13,4.95,3.01,12.5,3.17,2.19	T:C,T:C,T:C,T:C,T:C,T:C,T:C,T:C,T:C,T:C
AT2G01250	RPL7B	-	AT2G01250.1,AT2G01250.2	773.172196,0.0670624	17	2_133050,2_133956,2_133951,2_133081,2_134251,2_133313,2_133264,2_134236,2_133955,2_133513,2_133049,2_133353,2_132900,2_133322,2_133099,2_133320,2_134185	2.73e-84,6.69e-56,1.59e-32,2.32e-27,3.15e-14,3.4e-11,4.72e-10,1.36e-09,1.12e-08,7.76e-06,0.000325,0.000769,0.00115,0.0019,0.00459,0.00661,0.00711	0.0976,0.012,0.00515,0.0264,0.0904,0.0395,0.00496,0.00399,0.00164,0.00319,0.0282,0.00184,0.00283,0.00171,0.00177,0.00198,0.002	3.18,4.47,5.11,2.08,1.11,2.04,2.99,5.3,3.51,1.88,1.28,3.13,13.3,2.53,2.45,2.03,1.91	T:C,T:C,T:C,T:C,T:C,T:C,T:C,T:C,T:C,T:C,T:C,T:C,T:C,T:C,T:C,T:C,T:C
AT1G41880	RPL35AB	-	AT1G41880.1,AT1G41880.2	455.3114172,0.5183966	11	1_15651618,1_15651620,1_15651160,1_15651191,1_15651764,1_15651157,1_15651283,1_15651159,1_15651267,1_15652400,1_15651596	6.39e-84,3.63e-73,8.52e-42,1.28e-17,1.25e-16,3e-12,8.02e-11,2.19e-06,2.97e-06,5.91e-05,0.000126	0.053,0.124,0.166,0.0548,0.221,0.0528,0.0111,0.0238,0.00763,0.00424,0.00397	4.8,3.26,15.9,15.6,1.77,14.1,5.44,12.9,14.1,2.12,4.35	T:C,T:C,T:C,T:C,T:C,T:C,T:C,T:C,T:C,T:C,T:C
AT5G41520	RPS10B	-	AT5G41520.1,AT5G41520.2	447.071114,0	22	5_16609873,5_16610030,5_16609437,5_16610071,5_16610057,5_16609871,5_16609849,5_16610061,5_16609342,5_16609251,5_16610613,5_16609844,5_16610208,5_16609277,5_16609789,5_16609824,5_16609803,5_16610122,5_16609330,5_16610272,5_16609442,5_16610130	7.07e-84,6.96e-58,2.51e-51,6.03e-37,9.87e-20,6.44e-19,1.95e-16,1.02e-13,1.85e-12,2.41e-12,9.67e-12,3.28e-11,1.39e-09,4.69e-09,3.31e-08,1.37e-07,3.75e-05,9.23e-05,0.000155,0.000738,0.00104,0.0076	0.049,0.0278,0.0371,0.0275,0.0171,0.00805,0.00898,0.00517,0.00784,0.0182,0.0783,0.00439,0.00559,0.0149,0.00426,0.00572,0.00421,0.00201,0.00322,0.00114,0.00191,0.00161	4.8,4.37,4.73,3.91,3.82,4.12,3.23,4.84,14.8,14.4,2.63,4.52,5.42,15.7,3.77,2.49,3.38,4.54,13.5,13.4,4.07,2.64	T:C,T:C,T:C,T:C,T:C,T:C,T:C,T:C,T:C,T:C,T:C,T:C,T:C,T:C,T:C,T:C,T:C,T:C,T:C,T:C,T:C,T:C
AT5G33320	PPT1	+	AT5G33320.1	145.6336448	7	5_12591386,5_12590647,5_12591177,5_12591020,5_12591390,5_12590662,5_12590150	1.2e-83,2.91e-49,1.66e-12,4.4e-10,2.07e-08,3.79e-06,0.0023	0.0677,0.0717,0.0117,0.0107,0.00667,0.00615,0.00543	7.37,3.08,14.8,14.6,14.6,4.68,12.8	A:G,A:G,A:G,A:G,A:G,A:G,A:G
AT4G39080	VHA-A3	+	AT4G39080.1	188.35043	25	4_18214550,4_18214159,4_18214240,4_18214555,4_18214629,4_18214838,4_18213737,4_18214288,4_18214111,4_18213997,4_18211587,4_18213448,4_18213064,4_18214005,4_18214600,4_18214411,4_18212509,4_18213340,4_18213736,4_18213046,4_18214743,4_18214873,4_18211995,4_18209521,4_18214692	3.13e-83,7.91e-82,7.28e-53,1.14e-46,2.97e-36,9.88e-29,4.26e-20,4.85e-17,5.32e-14,4.67e-13,6e-09,1.04e-07,3.78e-07,5.63e-06,1.17e-05,8.4e-05,0.000155,0.000213,0.000242,0.000254,0.000416,0.00112,0.00707,0.00722,0.00798	0.115,0.101,0.0511,0.0509,0.0421,0.0522,0.526,0.0168,0.0169,0.0117,0.0242,0.00484,0.00628,0.00922,0.00513,0.0034,0.00672,0.00244,0.00374,0.00573,0.00412,0.00694,0.00261,0.00512,0.00354	4.73,6.89,5.77,5.09,7.21,5.31,2.32,6.14,4.44,14.9,2.37,5.03,14.9,4.8,12.7,13,3.58,14.6,13.8,3.46,13.8,13.2,3.73,12.1,3.69	A:G,A:G,A:G,A:G,A:G,A:G,A:G,A:G,A:G,A:G,A:G,A:G,A:G,A:G,A:G,A:G,A:G,A:G,A:G,A:G,A:G,A:G,A:G,A:G,A:G
AT1G04080	PRP39	+	AT1G04080.1,AT1G04080.3,AT1G04080.4,AT1G04080.2,AT1G04080.5	34.0307386,2.2852344,0.0210776,1.6000898,0.1190644	15	1_1056203,1_1056269,1_1056210,1_1056579,1_1056212,1_1056531,1_1056481,1_1056021,1_1056237,1_1056475,1_1056236,1_1056555,1_1056244,1_1056469,1_1052747	3.41e-83,5.07e-39,1.29e-16,1.03e-11,3.37e-08,1.69e-06,2.13e-06,2.42e-06,4.91e-06,0.00142,0.0015,0.00256,0.00276,0.00872,0.0088	0.383,0.219,0.0708,0.1,0.0483,0.0559,0.0563,0.0233,0.028,0.0199,0.0255,0.0242,0.0131,0.0226,0.00999	5.77,4.73,14.4,5.53,4.14,4.78,4.8,4.69,13,12.6,4.01,13.4,12,2.92,3.79	A:G,A:G,A:G,A:G,A:G,A:G,A:G,A:G,A:G,A:G,A:G,A:G,A:G,A:G,A:G
AT3G19910	BBR	+	AT3G19910.1,AT3G19910.2	64.5353964,1.4950006	8	3_6929294,3_6926515,3_6929364,3_6929381,3_6926814,3_6928751,3_6929395,3_6927054	3.57e-83,6.93e-26,8.15e-06,7.26e-05,0.000462,0.000689,0.0016,0.00825	0.27,0.0757,0.0301,0.0271,0.00741,0.0111,0.0299,0.00525	7.45,5.74,13.8,13.1,4.17,4.14,13.2,3.68	A:G,A:G,A:G,A:G,A:G,A:G,A:G,A:G
AT1G47550	SEC3A	+	AT1G47550.1,AT1G47550.2	28.5848568,1.5756526	5	1_17463066,1_17460866,1_17463910,1_17462087,1_17463936	9.86e-83,8.27e-24,6.76e-16,4.45e-15,3.65e-13	0.552,0.11,0.103,0.0864,0.0769	3.05,5.57,5.97,4.46,14.7	A:G,A:G,A:G,A:G,A:G
AT3G48140	T24C20_20	+	AT3G48140.1	1203.2630198	12	3_17779444,3_17779274,3_17779417,3_17779400,3_17779406,3_17779357,3_17779447,3_17779271,3_17779157,3_17779229,3_17779216,3_17779457	1.5e-82,6.3e-54,1.95e-46,1.44e-45,4.16e-22,4.62e-13,4.27e-09,5.33e-09,7.06e-07,2.01e-05,0.00047,0.00133	0.0398,0.00937,0.0758,0.0163,0.00704,0.00325,0.00584,0.00186,0.00109,0.00201,0.000598,0.00221	17.2,7.73,2.62,5.97,6.46,5.76,3.93,5.34,13.8,2.9,12.9,3.9	A:G,A:G,A:G,A:G,A:G,A:G,A:G,A:G,A:G,A:G,A:G,A:G
AT3G60440	AT3G60440	+	AT3G60440.1,AT3G60440.2	33.4851088,0.7406132	1	3_22339089	3.07e-82	0.409	3.87	A:G
AT1G79750	NADP-ME4	-	AT1G79750.1	165.2344332	32	1_30007955,1_30007896,1_30007666,1_30010938,1_30007431,1_30007873,1_30011334,1_30007399,1_30009737,1_30009743,1_30009720,1_30007444,1_30007966,1_30008554,1_30007531,1_30008390,1_30008905,1_30007401,1_30009559,1_30009569,1_30007716,1_30011326,1_30011204,1_30008081,1_30010524,1_30008720,1_30008889,1_30007722,1_30009020,1_30009430,1_30007622,1_30007961	5.48e-82,8.53e-56,3e-38,6.07e-22,1.59e-19,8.69e-19,1.23e-15,6.63e-15,9.5e-15,3.42e-10,2.22e-09,8.34e-09,4.13e-08,8.47e-08,6.73e-07,1.22e-06,3.62e-06,4.35e-06,7.52e-06,2.41e-05,2.41e-05,6.78e-05,0.000548,0.00102,0.00119,0.00478,0.00528,0.00548,0.00713,0.00743,0.00868,0.00923	0.0897,0.0549,0.0466,0.0302,0.15,0.0194,0.0598,0.161,0.0556,0.0113,0.0119,0.0691,0.00773,0.00606,0.0158,0.011,0.0062,0.0646,0.00902,0.00657,0.00433,0.0162,0.00302,0.00243,0.012,0.00249,0.00354,0.00334,0.00253,0.00383,0.00483,0.00673	4.45,4.5,6.25,2.98,15.8,4.77,5.04,5.94,2.08,3.73,3.18,5.22,5.07,14.8,4.86,2.47,2.76,13,3.28,4.54,13.9,3.63,4.15,13.1,2.42,3.83,2.41,3.8,3.01,2.95,2.95,1.87	T:C,T:C,T:C,T:C,T:C,T:C,T:C,T:C,T:C,T:C,T:C,T:C,T:C,T:C,T:C,T:C,T:C,T:C,T:C,T:C,T:C,T:C,T:C,T:C,T:C,T:C,T:C,T:C,T:C,T:C,T:C,T:C
AT4G27090	RPL14B	-	AT4G27090.1	2411.9836188	21	4_13594140,4_13594277,4_13594895,4_13594448,4_13594483,4_13594904,4_13594359,4_13594505,4_13594284,4_13594026,4_13594158,4_13594355,4_13594023,4_13594906,4_13594953,4_13594913,4_13594262,4_13594860,4_13594946,4_13594256,4_13594519	5.48e-82,2.42e-69,5.71e-53,6.2e-25,8.55e-19,4.49e-17,8.8e-17,7.22e-13,1.13e-09,1.17e-08,2.25e-08,1.52e-06,1.15e-05,1.58e-05,3.62e-05,0.000254,0.00102,0.00148,0.00197,0.00433,0.00951	0.0226,0.0532,0.0092,0.00467,0.101,0.0024,0.0039,0.00255,0.0021,0.00697,0.00303,0.00114,0.00398,8e-04,0.00233,0.00046,0.00061,0.000632,0.000807,0.00179,0.000413	7.42,4.13,3.66,3.72,2.08,4.39,2.67,3.28,4,4.35,2.6,3.54,4.62,3.77,3.4,12.1,13,2.26,3.97,2.36,2.64	T:C,T:C,T:C,T:C,T:C,T:C,T:C,T:C,T:C,T:C,T:C,T:C,T:C,T:C,T:C,T:C,T:C,T:C,T:C,T:C,T:C
AT3G53180	AT3G53180	+	AT3G53180.1	49.797709	7	3_19710679,3_19710739,3_19710228,3_19710419,3_19708913,3_19711184,3_19709418	6.24e-82,1.58e-10,4.95e-06,9.21e-05,0.00093,0.000986,0.00529	0.254,0.0292,0.0206,0.0101,0.0106,0.0133,0.053	3.56,4.56,4.73,13.1,13.2,12,1.6	A:G,A:G,A:G,A:G,A:G,A:G,A:G
AT5G10360	RPS6B	-	AT5G10360.1,AT5G10360.2	847.7153036,0.0505432	35	5_3258877,5_3259311,5_3258794,5_3259987,5_3259670,5_3258957,5_3259458,5_3259236,5_3258870,5_3259237,5_3259672,5_3258772,5_3259491,5_3258813,5_3259069,5_3258942,5_3259495,5_3259306,5_3260034,5_3259251,5_3259128,5_3259463,5_3259496,5_3258915,5_3260139,5_3258840,5_3259175,5_3260184,5_3258969,5_3258750,5_3259062,5_3258780,5_3258793,5_3259476,5_3259481	8.3e-82,3.44e-78,9.96e-59,1.13e-52,1.36e-50,7.89e-50,1.44e-48,1.32e-42,2.65e-28,1.31e-19,5.83e-18,7.75e-17,1.34e-13,3.5e-11,3.51e-11,2.63e-10,1.88e-09,2.37e-09,8.25e-08,3.37e-07,3.68e-06,8.27e-06,4.55e-05,0.000275,0.000276,0.000361,0.000485,0.000637,0.000798,0.000987,0.00144,0.0016,0.00298,0.00344,0.00998	0.038,0.0145,0.0283,0.0111,0.0147,0.0205,0.0111,0.00895,0.0179,0.0697,0.00728,0.00804,0.00419,0.00448,0.0028,0.0052,0.121,0.00211,0.00297,0.00285,0.00184,0.00179,0.00133,0.00146,0.00137,0.00218,0.00184,0.00211,0.00145,0.0015,0.00149,0.00156,0.00263,0.00105,0.000707	4.43,6.02,4.7,6.13,4.62,3.54,4.07,5.17,2.34,1.49,2.91,4.3,3.11,4.63,14.7,2.85,1.19,3.61,3.71,2.23,3.9,2.57,3.62,4.29,12.2,3.04,2.35,12.3,3.33,13.3,2.86,12.5,2.17,2.5,2.95	T:C,T:C,T:C,T:C,T:C,T:C,T:C,T:C,T:C,T:C,T:C,T:C,T:C,T:C,T:C,T:C,T:C,T:C,T:C,T:C,T:C,T:C,T:C,T:C,T:C,T:C,T:C,T:C,T:C,T:C,T:C,T:C,T:C,T:C,T:C
AT1G27310	NTF2A	-	AT1G27310.1	252.3722686	9	1_9485603,1_9485819,1_9485649,1_9485768,1_9484568,1_9485640,1_9484566,1_9485538,1_9484554	1.41e-81,2.22e-26,4.4e-16,6.78e-13,7.56e-11,1.44e-07,0.000129,0.000498,0.00076	0.046,0.0643,0.00814,0.0145,0.0118,0.00862,0.00648,0.00238,0.00464	5.6,2.78,15.3,3.35,5.48,2.55,3.15,4.23,12	T:C,T:C,T:C,T:C,T:C,T:C,T:C,T:C,T:C
AT1G19910	VHA-C2	+	AT1G19910.1,AT1G19910.2	785.1406354,0.8840414	17	1_6913508,1_6913528,1_6914311,1_6913616,1_6914323,1_6914202,1_6913570,1_6913668,1_6913568,1_6914306,1_6913669,1_6914190,1_6913511,1_6914353,1_6913663,1_6914284,1_6913361	6.2e-81,8.28e-35,1.61e-18,5.07e-15,4.6e-14,8.35e-11,1.07e-10,2.94e-08,9.23e-08,1.24e-07,4.71e-07,1.35e-06,2.36e-06,4.54e-05,0.000205,0.00023,0.00161	0.0226,0.00988,0.00696,0.00386,0.00512,0.00261,0.00258,0.00209,0.00535,0.00264,0.00175,0.00207,0.00225,0.00286,0.000664,0.00143,0.00105	5.62,4.09,4.77,3.58,14.2,4.07,3.53,3.28,2.78,5.03,3.25,3.05,2.97,4.48,13,4.3,4.01	A:G,A:G,A:G,A:G,A:G,A:G,A:G,A:G,A:G,A:G,A:G,A:G,A:G,A:G,A:G,A:G,A:G
AT5G58740	AT5G58740	-	AT5G58740.1	215.5887442	10	5_23725903,5_23727237,5_23727068,5_23725888,5_23725891,5_23726754,5_23726626,5_23725994,5_23725878,5_23726742	6.3e-81,5.83e-71,3.86e-26,3.19e-17,3.7e-16,3.77e-15,5.36e-12,1.74e-07,2.3e-06,0.00034	0.177,0.104,0.0281,0.0367,0.0341,0.0117,0.0156,0.00876,0.014,0.0035	7.39,4.46,3.53,6.09,6,15.7,15.8,12.9,14.6,13.6	T:C,T:C,T:C,T:C,T:C,T:C,T:C,T:C,T:C,T:C
AT1G04270	RPS15A	-	AT1G04270.1,AT1G04270.2	983.7325498,0.1021306	12	1_1141982,1_1141834,1_1142748,1_1142045,1_1142614,1_1142025,1_1142815,1_1141937,1_1141979,1_1141902,1_1141919,1_1142605	8.66e-81,1.83e-40,1.38e-23,2.31e-12,1.18e-10,3.07e-07,5.56e-06,2.52e-05,7.35e-05,0.000122,0.000177,0.00172	0.0699,0.0204,0.00391,0.00404,0.00275,0.00137,0.00163,0.0017,0.00167,0.00129,0.00206,0.00175	3.09,5.75,5.57,3.37,2.73,14.1,3.03,3.73,3.2,12.5,2.82,2.74	T:C,T:C,T:C,T:C,T:C,T:C,T:C,T:C,T:C,T:C,T:C,T:C
AT4G29430	RPS15AE	+	AT4G29430.1	74.8418156	7	4_14473292,4_14473379,4_14473438,4_14473433,4_14473344,4_14473425,4_14473143	1.19e-80,1.78e-29,6.31e-15,6.33e-05,0.00143,0.00242,0.00475	0.261,0.119,0.0856,0.0254,0.0171,0.0219,0.0182	3.88,6.84,5.87,13,4.02,12.8,1.87	A:G,A:G,A:G,A:G,A:G,A:G,A:G
AT4G26910	AT4G26910	-	AT4G26910.2,AT4G26910.1,AT4G26910.3	64.7833238,33.7739594,9.3840364	14	4_13520303,4_13519983,4_13520201,4_13520252,4_13522702,4_13520061,4_13520795,4_13520502,4_13520170,4_13522040,4_13520431,4_13521613,4_13521768,4_13521597	1.59e-80,4.87e-44,8.48e-20,2.62e-16,7.8e-11,3e-09,1.51e-07,1.45e-05,4.17e-05,0.000245,0.000366,0.000595,0.00301,0.00538	0.12,0.163,0.0255,0.0173,0.0303,0.0399,0.014,0.00634,0.00735,0.0106,0.00436,0.0238,0.00398,0.00627	5.11,16.6,6.29,6.01,2.88,5.32,13.6,14.4,12.7,2.77,13.3,1.78,13.8,2.22	T:C,T:C,T:C,T:C,T:C,T:C,T:C,T:C,T:C,T:C,T:C,T:C,T:C,T:C
AT2G33470	GLTP1	-	AT2G33470.2,AT2G33470.1	72.4217352,44.9821694	13	2_14177256,2_14176584,2_14176744,2_14177878,2_14176540,2_14176814,2_14177902,2_14176571,2_14176743,2_14176847,2_14177284,2_14177078,2_14177854	2.72e-80,7.94e-73,3.31e-48,2.58e-35,6.21e-21,1.56e-14,1.59e-13,2.15e-10,1.88e-09,8.15e-08,1.19e-07,0.00121,0.00123	0.2,0.0993,0.0837,0.0335,0.0365,0.0177,0.0104,0.0199,0.0139,0.0104,0.00876,0.00377,0.00498	2.93,7.15,5.61,4.68,15.6,5.85,14.6,4.57,5.24,4.18,4.19,4.07,3.27	T:C,T:C,T:C,T:C,T:C,T:C,T:C,T:C,T:C,T:C,T:C,T:C,T:C
AT5G20080	CBR2	+	AT5G20080.1	134.0322756	14	5_6786501,5_6785621,5_6786458,5_6786654,5_6785410,5_6785164,5_6786487,5_6786505,5_6786488,5_6786368,5_6785608,5_6786651,5_6786373,5_6785622	6.89e-80,1.83e-72,1.11e-29,4.94e-16,6.88e-16,5.09e-14,8.48e-10,1.38e-06,1.52e-06,2.49e-06,0.000196,0.000424,0.000911,0.00749	0.112,0.0963,0.0396,0.192,0.0329,0.00883,0.0147,0.0105,0.0104,0.00639,0.00567,0.0534,0.00445,0.0035	18.7,5.44,15.1,14.7,3.3,14.9,16,4.76,13.1,13.9,3.5,12.6,13.3,3.63	A:G,A:G,A:G,A:G,A:G,A:G,A:G,A:G,A:G,A:G,A:G,A:G,A:G,A:G
AT5G04870	CPK1	-	AT5G04870.1	47.2066066	7	5_1417648,5_1418006,5_1416969,5_1417023,5_1417653,5_1416975,5_1416853	9.23e-80,9.45e-31,1.09e-13,2.4e-13,1.03e-11,5.76e-06,6.36e-06	0.277,0.104,0.059,0.0373,0.036,0.0268,0.0813	4.04,4.34,14.9,15.6,15,13.7,13.4	T:C,T:C,T:C,T:C,T:C,T:C,T:C
AT3G46010	ADF1	-	AT3G46010.1,AT3G46010.2	170.3716808,0.1034238	2	3_16909561,3_16909633	8.67e-79,6.61e-15	0.178,0.0259	7.34,5.9	T:C,T:C
AT5G10480	PAS2	-	AT5G10480.1,AT5G10480.2,AT5G10480.3	138.6680692,0.1000564,0.0377518	8	5_3298034,5_3298283,5_3298031,5_3298022,5_3298040,5_3298096,5_3298030,5_3298021	8.84e-79,1.11e-60,1.61e-11,9.95e-08,1.97e-06,2.63e-06,0.0027,0.00361	0.277,0.123,0.034,0.0188,0.0164,0.0141,0.0117,0.0102	4.64,5.03,5.53,14,13.9,14.2,3.16,3.85	T:C,T:C,T:C,T:C,T:C,T:C,T:C,T:C
AT4G35450	AKR2	+	AT4G35450.1,AT4G35450.3,AT4G35450.2,AT4G35450.4,AT4G35450.5	50.3093254,42.4094964,30.435386,13.969458,0.0198372	4	4_16841779,4_16841443,4_16841778,4_16841807	9.92e-79,7.06e-10,2.01e-06,2.51e-06	0.122,0.0117,0.00776,0.00935	6.77,5.38,13.3,13	A:G,A:G,A:G,A:G
AT1G16000	AT1G16000	+	AT1G16000.1	236.9906944	5	1_5495102,1_5495137,1_5495214,1_5495159,1_5495184	1.05e-78,5.33e-70,1.91e-11,6.97e-06,0.00106	0.0864,0.101,0.0259,0.00775,0.00582	5.33,4.56,14.5,4.65,12.3	A:G,A:G,A:G,A:G,A:G
AT3G47836	AT3G47836	-	AT3G47836.1,AT3G47836.2	148.8994638,0.7399514	8	3_17650479,3_17650446,3_17650438,3_17651731,3_17650450,3_17650457,3_17650477,3_17651677	1.77e-78,4.22e-35,4.33e-15,5.54e-09,9.38e-07,8.85e-06,8.49e-05,0.000185	0.164,0.0723,0.0396,0.108,0.0115,0.0118,0.00525,0.00672	5.82,6.15,15.7,4.31,13.9,3.83,13.6,12.6	T:C,T:C,T:C,T:C,T:C,T:C,T:C,T:C
AT2G20530	PHB6	+	AT2G20530.1,AT2G20530.2	86.422108,0.3209806	7	2_8843746,2_8843677,2_8843747,2_8842040,2_8842438,2_8843624,2_8843403	2.73e-78,3.83e-07,1.25e-05,0.000138,0.000148,6e-04,0.00907	0.201,0.0105,0.0109,0.0253,0.00598,0.00579,0.00718	4.24,13.2,13.2,13,12.3,12.3,13.2	A:G,A:G,A:G,A:G,A:G,A:G,A:G
AT4G17830	AT4G17830	+	AT4G17830.1,AT4G17830.2	32.8421762,0.0543364	1	4_9917958	2.86e-78	0.486	4.93	A:G
AT4G14220	RHF1A	+	AT4G14220.1	19.8010004	3	4_8198251,4_8198253,4_8198252	3.41e-78,2.5e-70,8.93e-22	0.527,0.423,0.133	4.85,8.23,15.5	A:G,A:G,A:G
AT5G16390	BCCP1	-	AT5G16390.1,AT5G16390.2	57.4638826,0.0755612	5	5_5361033,5_5361905,5_5361068,5_5362428,5_5361626	7.31e-78,3.95e-05,9.83e-05,0.00234,0.00841	0.301,0.0183,0.0116,0.0113,0.0132	6.07,4.49,13.3,2.85,3.76	T:C,T:C,T:C,T:C,T:C
AT4G20850	TPP2	-	AT4G20850.1	80.3360206	13	4_11161189,4_11161319,4_11160936,4_11161316,4_11165652,4_11167255,4_11161041,4_11169467,4_11160981,4_11162387,4_11161037,4_11161302,4_11160923	1.37e-77,1.55e-59,4.36e-17,9.77e-09,3.07e-08,5.26e-07,8.47e-07,5.6e-05,8.76e-05,0.000147,0.000227,0.000325,0.00709	0.197,0.161,0.0427,0.0112,0.015,0.038,0.016,0.0475,0.00671,0.0134,0.0044,0.00743,0.00746	3.79,5.02,6.11,5.22,5.11,2.04,4.11,1.34,12.6,3.52,13.4,2.77,3.73	T:C,T:C,T:C,T:C,T:C,T:C,T:C,T:C,T:C,T:C,T:C,T:C,T:C
AT2G39760	BPM3	+	AT2G39760.1,AT2G39760.2,AT2G39760.3,AT2G39760.4	28.5775866,1.3035302,1.0300246,0.3932816	4	2_16585982,2_16586052,2_16583308,2_16586053	1.51e-77,8.8e-09,1.34e-08,1.86e-06	0.585,0.0868,0.0424,0.0606	6.36,13.4,5.12,14.9	A:G,A:G,A:G,A:G
AT4G13780	AT4G13780	-	AT4G13780.1	59.6665422	5	4_7993399,4_7993466,4_7994672,4_7994253,4_7997551	2.67e-77,3.3e-28,7.65e-12,8.71e-12,9.34e-06	0.266,0.0594,0.028,0.0351,0.0271	6.33,15.8,3.45,5.64,3.81	T:C,T:C,T:C,T:C,T:C
AT1G07890	APX1	+	AT1G07890.1,AT1G07890.3,AT1G07890.2,AT1G07890.8,AT1G07890.4,AT1G07890.6,AT1G07890.7,AT1G07890.5	1068.9182222,537.818814,16.4473176,6.8795998,5.8965974,5.7250532,2.6954696,1.1394906	8	1_2439527,1_2438967,1_2439537,1_2438825,1_2439180,1_2438991,1_2438801,1_2439002	7.09e-77,6.22e-19,5.75e-10,1.8e-08,4.17e-08,1.81e-06,2.42e-06,7.93e-05	0.0316,0.00808,0.00366,0.00204,0.00177,0.00139,0.00172,0.000794	6.79,3.21,4.5,3.22,3.48,3.58,2.46,4.34	A:G,A:G,A:G,A:G,A:G,A:G,A:G,A:G
AT5G41700	UBC8	+	AT5G41700.1,AT5G41700.5,AT5G41700.3,AT5G41700.2,AT5G41700.4	505.0124558,1.809717,1.3581394,0.573087,0.4115632	18	5_16676112,5_16676103,5_16676116,5_16676791,5_16677396,5_16676618,5_16677185,5_16677191,5_16677222,5_16676505,5_16677106,5_16676815,5_16676617,5_16676115,5_16675879,5_16676578,5_16676523,5_16676821	7.88e-77,1.6e-72,4.55e-45,5.98e-28,6.5e-24,1.98e-23,1.51e-16,2.24e-15,3.66e-14,1.27e-12,4.63e-11,5.74e-11,6.63e-10,1.42e-06,1.16e-05,0.000153,0.00307,0.00425	0.101,0.238,0.0772,0.0107,0.166,0.00866,0.00947,0.0203,0.0107,0.00502,0.0129,0.00464,0.00475,0.00579,0.007,0.00134,0.0018,0.000956	4.16,2.61,2.97,3.74,16,5.1,6.16,3.43,14.7,4.82,2.91,3.4,3.12,3.76,4.67,13.7,3.18,3.89	A:G,A:G,A:G,A:G,A:G,A:G,A:G,A:G,A:G,A:G,A:G,A:G,A:G,A:G,A:G,A:G,A:G,A:G
AT1G56450	PBG1	+	AT1G56450.1	137.3700286	4	1_21144198,1_21143625,1_21144344,1_21144160	9.5e-77,1.33e-09,1.72e-06,0.000165	0.114,0.0144,0.0552,0.00527	8.24,3.93,12.8,14.1	A:G,A:G,A:G,A:G
AT4G38680	CSP2	-	AT4G38680.1	345.7592236	3	4_18072254,4_18071990,4_18072603	1.84e-76,7.07e-37,5.14e-06	0.0391,0.0495,0.00563	3.48,16.9,1.96	T:C,T:C,T:C
AT5G16550	AT5G16550	+	AT5G16550.1	59.889519	4	5_5406690,5_5406601,5_5406691,5_5406759	4.08e-76,1.41e-49,3.18e-05,0.000261	0.484,0.12,0.0177,0.0285	3.18,7.63,12.5,4.24	A:G,A:G,A:G,A:G
AT1G26550	AT1G26550	+	AT1G26550.1	440.8379806	23	1_9172518,1_9171817,1_9172454,1_9172487,1_9172744,1_9171859,1_9172126,1_9172530,1_9172738,1_9172749,1_9172849,1_9171931,1_9171839,1_9172709,1_9172564,1_9172451,1_9171828,1_9171895,1_9172569,1_9171924,1_9172529,1_9171835,1_9171840	4.14e-76,2.72e-47,7.87e-38,8.5e-29,2.67e-24,7.83e-21,6.25e-17,7.42e-16,2.94e-15,2.32e-11,1.08e-10,1.11e-10,1.32e-10,1.63e-08,4.2e-08,1.32e-05,1.94e-05,4.55e-05,7.82e-05,7.97e-05,0.000178,0.00113,0.00974	0.0371,0.0543,0.255,0.011,0.0225,0.00917,0.0875,0.2,0.0134,0.0106,0.0235,0.00454,0.00732,0.0292,0.00669,0.00546,0.00651,0.00216,0.00219,0.00182,0.00271,0.00304,0.00231	18.9,5.06,2.61,4.69,14.8,6.34,2.37,4.04,5.89,14.6,14.9,4.01,4.55,3.17,3.04,2.41,3.87,4.46,12.9,3.59,3.44,4.04,2.33	A:G,A:G,A:G,A:G,A:G,A:G,A:G,A:G,A:G,A:G,A:G,A:G,A:G,A:G,A:G,A:G,A:G,A:G,A:G,A:G,A:G,A:G,A:G
AT1G64550	ABCF3	+	AT1G64550.1	54.3106466	9	1_23972073,1_23973344,1_23973486,1_23973347,1_23972083,1_23972085,1_23972698,1_23973092,1_23971785	5.65e-76,5.83e-07,2.31e-06,3.37e-05,3.74e-05,0.000325,0.00123,0.00369,0.00465	0.21,0.0235,0.046,0.0126,0.0115,0.00889,0.00874,0.0125,0.0121	4.68,4.01,13.9,13.4,13.8,12.9,12.9,2.92,3.79	A:G,A:G,A:G,A:G,A:G,A:G,A:G,A:G,A:G
AT5G20890	CCT2	-	AT5G20890.1	187.8524328	5	5_7087043,5_7087424,5_7087134,5_7087138,5_7088109	8.06e-76,8.88e-22,2.06e-09,0.000115,0.000479	0.183,0.0286,0.00776,0.00416,0.00483	3.7,3.58,5.24,4.31,2.32	T:C,T:C,T:C,T:C,T:C
AT2G06530	VPS2.1	-	AT2G06530.1,AT2G06530.2	95.5777836,0.0811992	1	2_2588745	1.09e-75	0.171	7.24	T:C
AT3G05590	RPL18B	+	AT3G05590.1,AT3G05590.2,AT3G05590.3	1237.0140816,1.3722412,0.254281	23	3_1622626,3_1622699,3_1622726,3_1622027,3_1621880,3_1622021,3_1621879,3_1622415,3_1621846,3_1622768,3_1621834,3_1622092,3_1621873,3_1622049,3_1622740,3_1622028,3_1621826,3_1622735,3_1622446,3_1622406,3_1622096,3_1621833,3_1622462	1.36e-75,1.51e-63,7.1e-20,1.15e-19,1.09e-17,1.72e-15,2.3e-15,4.12e-13,4.34e-12,4.71e-12,5.95e-10,2.4e-09,4.44e-09,2.27e-08,2.96e-08,2.19e-07,6.51e-07,2.38e-06,2.23e-05,2.31e-05,0.000611,0.000923,0.00242	0.0233,0.0345,0.00959,0.00305,0.0111,0.0128,0.00363,0.00795,0.00287,0.00458,0.00328,0.00202,0.168,0.0257,0.00257,0.00339,0.0511,0.00228,0.00133,0.00151,0.00192,0.000939,0.00111	4.02,4.51,3.03,4.49,3.54,2.51,3.29,2.23,3.91,4.71,3.45,3.59,1.42,1.82,5.1,1.61,1.15,4.87,4.56,3.29,1.84,4.08,3.92	A:G,A:G,A:G,A:G,A:G,A:G,A:G,A:G,A:G,A:G,A:G,A:G,A:G,A:G,A:G,A:G,A:G,A:G,A:G,A:G,A:G,A:G,A:G
AT3G62810	AT3G62810	+	AT3G62810.1,AT3G62810.2	224.9528544,0.8694874	7	3_23228234,3_23227964,3_23227904,3_23227961,3_23228235,3_23228116,3_23228001	3.68e-75,3.58e-33,1.22e-32,3.55e-22,1.78e-14,0.000146,0.00482	0.215,0.0224,0.0834,0.0642,0.0237,0.0053,0.00403	4.35,5,2.31,3.18,14.4,3.55,2.44	A:G,A:G,A:G,A:G,A:G,A:G,A:G
AT4G25370	AT4G25370	+	AT4G25370.1	68.3130306	9	4_12974356,4_12974719,4_12974544,4_12973299,4_12974393,4_12974571,4_12972866,4_12974383,4_12974141	5.14e-75,1.75e-21,5.16e-15,4.61e-09,4.94e-07,5.54e-06,3.17e-05,0.000374,0.000578	0.211,0.0965,0.043,0.0164,0.02,0.015,0.0143,0.0174,0.00629	4.55,15.1,4.49,14.5,14.1,14.7,3.71,2.54,12.5	A:G,A:G,A:G,A:G,A:G,A:G,A:G,A:G,A:G
AT3G49390	CID10	-	AT3G49390.1,AT3G49390.2,AT3G49390.3	29.1766244,12.9231072,1.2469984	4	3_18314841,3_18314848,3_18314847,3_18315987	6.74e-75,5.64e-19,5.13e-16,3.82e-05	0.196,0.0596,0.0426,0.0247	16.7,4.75,5.96,3.23	T:C,T:C,T:C,T:C
AT1G49300	RABG3E	+	AT1G49300.1,AT1G49300.2	93.9186502,12.5103106	4	1_18236714,1_18236986,1_18236368,1_18236969	7.43e-75,1.66e-28,4.46e-07,0.00834	0.0956,0.0396,0.00959,0.00643	7.33,6.8,4.92,13.5	A:G,A:G,A:G,A:G
AT5G48810	CYTB5-D	-	AT5G48810.1	471.2647194	19	5_19789404,5_19789230,5_19789272,5_19789303,5_19789309,5_19789378,5_19789269,5_19789265,5_19790134,5_19789358,5_19789426,5_19790122,5_19789229,5_19790164,5_19789465,5_19789408,5_19790129,5_19789359,5_19789271	7.52e-75,1e-56,7.44e-53,3.08e-42,4.34e-33,3.57e-31,7.9e-27,6.07e-22,2.03e-19,7.05e-14,1.09e-12,2.85e-11,1.04e-10,2.83e-08,4.6e-07,6.87e-07,2.53e-06,1.14e-05,0.00123	0.0307,0.0581,0.044,0.0257,0.0243,0.0129,0.0193,0.0171,0.00822,0.00696,0.00458,0.00493,0.0104,0.0173,0.00266,0.00299,0.00247,0.00373,0.00488	6.65,18.2,5.21,5.83,6.11,17.4,6.71,6.43,16.7,5.79,5.67,14.1,5.49,2.96,4.89,4.85,13.1,3.35,2.42	T:C,T:C,T:C,T:C,T:C,T:C,T:C,T:C,T:C,T:C,T:C,T:C,T:C,T:C,T:C,T:C,T:C,T:C,T:C
AT4G18730	RPL11B	+	AT4G18730.1	650.2443906	13	4_10303207,4_10302383,4_10303090,4_10302356,4_10302858,4_10303181,4_10302749,4_10302426,4_10303097,4_10302360,4_10303163,4_10302373,4_10302381	1.91e-74,1.53e-27,6.14e-27,3.91e-19,9.41e-17,4.77e-16,3.2e-12,1.66e-06,4.66e-05,5.82e-05,0.000427,0.000726,0.00548	0.0876,0.0089,0.0129,0.0867,0.0072,0.00903,0.00666,0.00545,0.00257,0.00285,0.00205,0.00312,0.00159	5.46,6.73,3.49,1.81,3.81,15,2.52,2.39,3.25,3.22,12.3,2.09,2.66	A:G,A:G,A:G,A:G,A:G,A:G,A:G,A:G,A:G,A:G,A:G,A:G,A:G
AT2G17190	DSK2A	-	AT2G17190.1	58.418867	7	2_7478114,2_7478138,2_7478104,2_7479333,2_7478134,2_7478266,2_7481189	2.02e-74,9.74e-31,3.48e-06,2.75e-05,5.8e-05,7.29e-05,0.008	0.232,0.0816,0.0181,0.0109,0.0228,0.0138,0.00921	18.6,6.9,14,4.49,4.47,13.5,2.98	T:C,T:C,T:C,T:C,T:C,T:C,T:C
AT2G22400	AT2G22400	-	AT2G22400.1	31.8641574	5	2_9504965,2_9505497,2_9505601,2_9505583,2_9504805	2.51e-74,5.66e-13,4.87e-08,5e-05,0.000264	0.427,0.19,0.0287,0.103,0.0365	6.28,2.66,4.23,2.03,12.2	T:C,T:C,T:C,T:C,T:C
AT5G57440	GPP2	-	AT5G57440.1	27.765519	5	5_23271426,5_23271427,5_23271369,5_23271411,5_23271325	4.31e-74,1.59e-35,3.75e-05,3.91e-05,0.000305	0.519,0.261,0.048,0.0331,0.078	5.35,5.67,14.7,13.5,13.4	T:C,T:C,T:C,T:C,T:C
AT1G04480	RPL23C	+	AT1G04480.1	729.133915	10	1_1216367,1_1216452,1_1217225,1_1217263,1_1216477,1_1216482,1_1216368,1_1217269,1_1217256,1_1216435	4.5e-74,4.18e-70,4.07e-57,4.36e-34,1.46e-09,2.27e-07,5.08e-06,1.13e-05,0.000163,0.00367	0.0208,0.0314,0.0362,0.038,0.00293,0.00209,0.00246,0.00581,0.00465,0.000787	4.09,4.05,6.83,5.16,16.1,5.07,2.59,14.4,13.4,12.9	A:G,A:G,A:G,A:G,A:G,A:G,A:G,A:G,A:G,A:G
AT1G02560	CLPP5	+	AT1G02560.1	68.6032744	8	1_539818,1_539832,1_539790,1_539812,1_539000,1_538944,1_539412,1_539613	6.16e-74,5.81e-38,2.3e-19,2.94e-12,4.81e-10,1.64e-07,4.37e-06,0.000117	0.247,0.123,0.0483,0.0354,0.0206,0.0153,0.0115,0.00934	8.36,7.26,15.5,15,14.2,13.7,13.3,13.6	A:G,A:G,A:G,A:G,A:G,A:G,A:G,A:G
AT3G55460	SCL30	+	AT3G55460.1	99.978928	18	3_20562793,3_20562602,3_20562538,3_20563063,3_20562539,3_20563216,3_20563190,3_20563567,3_20561345,3_20563069,3_20563402,3_20563440,3_20562542,3_20563400,3_20563024,3_20563293,3_20562644,3_20561306	1.25e-73,5.57e-64,2.41e-61,1.18e-38,1.03e-23,2.31e-16,5.71e-12,7.52e-12,1.02e-09,8.64e-07,1.03e-05,1.99e-05,2.22e-05,0.000331,0.000654,0.00105,0.00116,0.00706	0.0723,0.0577,0.0978,0.0379,0.0411,0.0195,0.0141,0.0295,0.0268,0.00517,0.0101,0.0103,0.00996,0.0094,0.00306,0.00554,0.00525,0.00806	5.88,6,7.91,4.15,6.52,4.23,3.86,14.7,3.95,14.1,13.1,13.7,3.74,13,4.11,12.8,2.45,3.72	A:G,A:G,A:G,A:G,A:G,A:G,A:G,A:G,A:G,A:G,A:G,A:G,A:G,A:G,A:G,A:G,A:G,A:G
AT2G38700	MVD1	-	AT2G38700.1	129.1104698	30	2_16181256,2_16183252,2_16183344,2_16181728,2_16182375,2_16180909,2_16183668,2_16183638,2_16181071,2_16182688,2_16181269,2_16181683,2_16180896,2_16181037,2_16181924,2_16181473,2_16181703,2_16182424,2_16182335,2_16181623,2_16181044,2_16181466,2_16181652,2_16181268,2_16181676,2_16181101,2_16181275,2_16183375,2_16181913,2_16181465	2.34e-73,2.28e-43,1.83e-23,7.19e-22,3.86e-18,2.82e-15,4.13e-12,9.66e-11,1.01e-10,8.36e-10,2.32e-09,4.02e-09,1.07e-08,4.08e-07,6.87e-07,7e-07,4.17e-06,7.75e-06,2.72e-05,5.29e-05,0.000148,0.000349,0.000493,0.000553,0.000979,0.00119,0.00153,0.00207,0.0034,0.00611	0.107,0.0894,0.0354,0.0302,0.0333,0.0175,0.0079,0.00837,0.0124,0.0141,0.0111,0.00824,0.011,0.00726,0.00812,0.00928,0.00785,0.0114,0.00965,0.00548,0.00487,0.00509,0.00353,0.00887,0.00474,0.00426,0.00464,0.00347,0.00332,0.00363	5.07,3.36,3.48,3.72,4.1,16.3,14.8,3.75,4.07,5.33,13.8,15.3,5.14,14,4.86,5,3.87,3.38,3.71,4.43,4.31,4.23,13.6,3.4,3.3,12.4,4.01,3.92,13.5,3.77	T:C,T:C,T:C,T:C,T:C,T:C,T:C,T:C,T:C,T:C,T:C,T:C,T:C,T:C,T:C,T:C,T:C,T:C,T:C,T:C,T:C,T:C,T:C,T:C,T:C,T:C,T:C,T:C,T:C,T:C
AT3G60300	AT3G60300	+	AT3G60300.1,AT3G60300.2	90.5559288,0.1202444	26	3_22285397,3_22287088,3_22287349,3_22287227,3_22285504,3_22287084,3_22287365,3_22286835,3_22287278,3_22287370,3_22286435,3_22286599,3_22286775,3_22285485,3_22287087,3_22287332,3_22286688,3_22287269,3_22285382,3_22285820,3_22287275,3_22286022,3_22286963,3_22286799,3_22285953,3_22286668	2.37e-73,8.23e-50,4.7e-46,5.4e-32,1.57e-27,2.54e-25,2.17e-23,9.44e-21,1.09e-20,1.66e-18,1.58e-17,2.28e-15,3.51e-15,1.58e-14,6.71e-12,8.15e-11,2.26e-08,2.94e-08,3.17e-08,3.12e-06,3.82e-05,9.51e-05,0.000107,0.00011,0.000127,0.00178	0.295,0.0755,0.185,0.0772,0.0596,0.0413,0.0974,0.0339,0.0566,0.0899,0.0836,0.0252,0.0178,0.0236,0.0172,0.0294,0.0152,0.0172,0.0302,0.015,0.00974,0.00935,0.00779,0.00657,0.00793,0.00406	4.26,7.66,6.03,4.41,5.84,5.74,15.2,3.94,4.58,15,3.88,4.2,4.54,14.4,14.6,14.8,4.12,14.6,15.4,4.77,13.2,13.7,3.18,3.61,13.4,4.02	A:G,A:G,A:G,A:G,A:G,A:G,A:G,A:G,A:G,A:G,A:G,A:G,A:G,A:G,A:G,A:G,A:G,A:G,A:G,A:G,A:G,A:G,A:G,A:G,A:G,A:G
AT4G37830	COX6A	-	AT4G37830.1,AT4G37830.2,AT4G37830.3	1707.8713236,0.1124664,0.3749024	17	4_17788283,4_17788238,4_17788739,4_17788301,4_17788260,4_17787656,4_17787622,4_17788279,4_17788300,4_17788704,4_17788682,4_17787691,4_17788207,4_17787925,4_17788765,4_17788727,4_17788278	2.83e-73,5.33e-30,1.23e-18,2.23e-14,6.65e-13,3.29e-12,2.38e-11,1.06e-10,1.11e-08,1.2e-06,1.27e-05,1.46e-05,3.93e-05,0.000572,0.000804,0.00439,0.0069	0.0234,0.00709,0.0108,0.00456,0.00307,0.00345,0.00593,0.00301,0.00225,0.00229,0.000898,0.00138,0.00127,0.000793,0.00182,0.00124,0.00096	3.99,6.02,3.17,4.16,3.96,15,13.8,3.29,3.33,3.58,14.5,4.59,3.67,13.3,14.5,2.71,2.79	T:C,T:C,T:C,T:C,T:C,T:C,T:C,T:C,T:C,T:C,T:C,T:C,T:C,T:C,T:C,T:C,T:C
AT4G25100	FSD1	-	AT4G25100.2,AT4G25100.3,AT4G25100.1,AT4G25100.4,AT4G25100.5	1166.6391334,1.966712,0.962614,0.1710044,2.0862346	12	4_12884597,4_12884731,4_12884623,4_12884727,4_12884416,4_12884570,4_12885136,4_12884617,4_12884602,4_12885568,4_12885625,4_12885299	6.8e-73,6.1e-49,3.86e-34,7.07e-10,8.94e-10,1.13e-09,8.88e-09,1.84e-07,0.00181,0.0035,0.00566,0.00756	0.021,0.0138,0.255,0.00276,0.0525,0.00327,0.00278,0.00238,0.00114,0.00125,0.000786,0.000778	5.91,3.87,2.21,2.76,5.32,5.32,2.17,3.69,4.08,2.03,3.04,2.29	T:C,T:C,T:C,T:C,T:C,T:C,T:C,T:C,T:C,T:C,T:C,T:C
AT1G01910	AT1G01910	-	AT1G01910.2,AT1G01910.4,AT1G01910.5,AT1G01910.3,AT1G01910.1	31.898456,4.0445706,0.0621464,0,36.3787134	7	1_313521,1_313661,1_313441,1_313442,1_313679,1_315738,1_313662	1.84e-72,3.19e-26,2.1e-21,7.92e-19,6.88e-05,0.000306,0.000424	0.41,0.0896,0.164,0.131,0.0173,0.0105,0.0139	4.19,6.74,16.5,15.6,4.48,2.76,12.2	T:C,T:C,T:C,T:C,T:C,T:C,T:C
AT1G24510	CCT5	-	AT1G24510.1,AT1G24510.2,AT1G24510.3	225.1307548,0.2082406,0.0896622	11	1_8685869,1_8685623,1_8686947,1_8686065,1_8685643,1_8686665,1_8687083,1_8685994,1_8686519,1_8686061,1_8685993	3.82e-72,1.18e-15,4.26e-14,1.45e-11,8.52e-10,1.44e-08,1.48e-05,2.26e-05,2.82e-05,0.000292,0.000638	0.071,0.0132,0.0117,0.0091,0.00666,0.00842,0.00703,0.00546,0.00331,0.0088,0.00182	3.58,5.93,4.38,3.83,14.5,3.79,3.67,2.35,4.49,1.66,14.1	T:C,T:C,T:C,T:C,T:C,T:C,T:C,T:C,T:C,T:C,T:C
AT4G24550	AP4M	+	AT4G24550.2,AT4G24550.3,AT4G24550.1	65.522841,0.2151146,0.1453564	7	4_12677986,4_12678704,4_12676808,4_12678913,4_12678726,4_12677365,4_12678719	3.96e-72,1.06e-08,1.12e-06,0.000115,0.000577,0.00149,0.00196	0.157,0.0219,0.0288,0.0157,0.00725,0.00865,0.00941	3.37,5.18,2.99,13.7,12.6,12.9,12.9	A:G,A:G,A:G,A:G,A:G,A:G,A:G
AT2G20580	RPN1A	+	AT2G20580.1	84.4715626	7	2_8864421,2_8863375,2_8864753,2_8862829,2_8864003,2_8863208,2_8864415	6.04e-72,4.04e-10,1.24e-08,1.68e-08,1.98e-08,2.14e-05,0.000328	0.123,0.0417,0.0274,0.024,0.00764,0.0217,0.00475	3.73,2.68,14.5,5.11,14.1,3.64,13.4	A:G,A:G,A:G,A:G,A:G,A:G,A:G
AT5G27640	TIF3B1	-	AT5G27640.1,AT5G27640.2,AT5G27640.3	46.6680936,20.035646,8.0975838	4	5_9781225,5_9781261,5_9781898,5_9781208	8e-72,3.12e-17,0.00012,0.000154	0.225,0.0457,0.0124,0.0132	8.25,16,4.34,13.6	T:C,T:C,T:C,T:C
AT5G08300	AT5G08300	+	AT5G08300.1	187.2791246	12	5_2669734,5_2668119,5_2669733,5_2669367,5_2668951,5_2669255,5_2669361,5_2669254,5_2667551,5_2669635,5_2667745,5_2668846	2.15e-71,2.9e-27,1.62e-07,5.81e-06,1.09e-05,1.31e-05,3.07e-05,0.000183,0.000313,0.000448,0.000791,0.00301	0.135,0.0439,0.0155,0.00493,0.0074,0.00451,0.00537,0.00283,0.00655,0.00589,0.00346,0.00382	8.21,3.38,13.8,3.83,2.66,4.6,14.2,12.7,4.22,12.3,4.07,3.99	A:G,A:G,A:G,A:G,A:G,A:G,A:G,A:G,A:G,A:G,A:G,A:G
AT4G30190	AHA2	-	AT4G30190.1,AT4G30190.2	968.5711308,3.9961594	9	4_14771021,4_14770909,4_14770619,4_14770806,4_14771154,4_14771156,4_14771556,4_14771166,4_14771151	2.22e-71,5.78e-43,1.74e-27,1.84e-05,0.000154,0.00172,0.00222,0.00315,0.00757	0.0175,0.0118,0.0213,0.0015,0.00239,0.000727,0.001,0.000613,0.00077	4.83,4.39,4.9,3.77,1.83,3.93,2.35,3.9,2.57	T:C,T:C,T:C,T:C,T:C,T:C,T:C,T:C,T:C
AT4G19210	ABCE2	+	AT4G19210.1	91.0474948	8	4_10505001,4_10504955,4_10505000,4_10505104,4_10504942,4_10505006,4_10504727,4_10504728	2.46e-71,4.67e-47,5.2e-21,1.53e-16,4.75e-11,5.49e-08,9.7e-05,0.000577	0.18,0.117,0.0584,0.11,0.0181,0.0198,0.0069,0.00625	6.62,6.62,15.7,15.4,14,5.07,13.2,13	A:G,A:G,A:G,A:G,A:G,A:G,A:G,A:G
AT1G04690	KAB1	+	AT1G04690.1	92.6551728	3	1_1315399,1_1313987,1_1314651	2.49e-71,8.49e-12,3.48e-05	0.147,0.0255,0.0061	17.8,3.62,3.68	A:G,A:G,A:G
AT1G25350	OVA9	-	AT1G25350.1,AT1G25350.2	43.2689174,0.0278376	5	1_8889467,1_8889326,1_8891063,1_8889553,1_8889309	3.23e-71,2.21e-17,3.91e-14,2.5e-09,0.00292	0.32,0.0902,0.0488,0.0471,0.0208	4.63,6.12,4.91,3.54,13.2	T:C,T:C,T:C,T:C,T:C
AT1G29150	RPN6	+	AT1G29150.1,AT1G29150.2	115.1537544,0.1762806	8	1_10182557,1_10181896,1_10182413,1_10182486,1_10181467,1_10182091,1_10182394,1_10182453	4.22e-71,3.6e-39,1.48e-11,3.81e-10,8.87e-08,6.95e-07,4.19e-05,0.0012	0.223,0.0898,0.0162,0.0209,0.0116,0.00693,0.00832,0.00603	8.16,3.38,13.8,14.1,4.14,14.6,3.64,12.9	A:G,A:G,A:G,A:G,A:G,A:G,A:G,A:G
AT2G27600	SKD1	+	AT2G27600.1	93.5218814	6	2_11783732,2_11783798,2_11783721,2_11783802,2_11783468,2_11783871	5.48e-71,7.91e-11,2.34e-10,7.66e-10,3.32e-08,0.00062	0.181,0.0417,0.0258,0.0356,0.0108,0.0348	17.6,13.8,5.42,15.5,15.3,12	A:G,A:G,A:G,A:G,A:G,A:G
AT1G33140	RPL9B	+	AT1G33140.1	1050.2514482	18	1_12024490,1_12024492,1_12024496,1_12024479,1_12023999,1_12024495,1_12024474,1_12024529,1_12023998,1_12024550,1_12023697,1_12023961,1_12023730,1_12024447,1_12023624,1_12024483,1_12024432,1_12023911	6.51e-71,9.7e-68,9.54e-55,4.42e-28,1.56e-16,1.21e-12,7.39e-10,7.84e-10,4.94e-08,5.9e-07,6.59e-05,0.000244,0.000271,0.00037,0.000463,0.000537,0.000692,0.00537	0.0236,0.0256,0.0194,0.0109,0.00624,0.00409,0.00401,0.00542,0.00428,0.00264,0.00611,0.00122,0.00295,0.0044,0.00842,0.00146,0.002,0.00305	6.15,7.09,7.73,4.06,6.06,5.66,3.42,3.53,3.17,15.1,4.43,13.9,13.8,1.49,12,4.11,3.31,2.41	A:G,A:G,A:G,A:G,A:G,A:G,A:G,A:G,A:G,A:G,A:G,A:G,A:G,A:G,A:G,A:G,A:G,A:G
AT5G49540	AT5G49540	-	AT5G49540.1,AT5G49540.2	58.561933,1.6743866	4	5_20104729,5_20104788,5_20104728,5_20104826	9.84e-71,2.88e-61,1.22e-52,5.65e-07	0.269,0.164,0.21,0.0169	16.8,8,16.3,13.8	T:C,T:C,T:C,T:C
AT1G10670	ACLA-1	+	AT1G10670.1,AT1G10670.2,AT1G10670.4,AT1G10670.3	231.5419718,25.8279278,3.8428094,0.0841368	29	1_3537776,1_3536522,1_3535874,1_3538064,1_3537701,1_3537550,1_3535884,1_3535837,1_3536547,1_3537239,1_3537923,1_3536151,1_3536135,1_3537562,1_3538143,1_3538111,1_3537214,1_3536716,1_3535845,1_3536172,1_3536879,1_3537782,1_3537208,1_3538076,1_3536389,1_3538125,1_3537396,1_3536727,1_3537576	1.74e-70,2.06e-37,1.44e-34,1.74e-34,3.86e-20,6.57e-17,2e-15,1.77e-12,1.91e-12,4.08e-12,5.89e-12,3.01e-11,1.08e-09,2.78e-09,1.8e-08,3.65e-07,9.23e-07,2.18e-06,7.32e-06,9.71e-06,1.04e-05,1.94e-05,5.53e-05,9.06e-05,0.00051,0.000707,0.00141,0.00513,0.00954	0.0503,0.0355,0.0178,0.0264,0.00792,0.0108,0.00964,0.00896,0.00783,0.00809,0.00775,0.0274,0.00617,0.00493,0.0122,0.00776,0.00432,0.00543,0.00379,0.0031,0.00462,0.00347,0.00256,0.00386,0.0022,0.00461,0.00252,0.00602,0.00146	3.89,4.54,6.08,16.5,15.6,4.65,4.5,5.63,14.2,4.2,3.86,3.01,4.42,4.35,5.1,14.1,4.83,4.75,13.6,13.8,13.4,3.73,12.6,13.7,14.8,13.4,3.99,2.73,3.64	A:G,A:G,A:G,A:G,A:G,A:G,A:G,A:G,A:G,A:G,A:G,A:G,A:G,A:G,A:G,A:G,A:G,A:G,A:G,A:G,A:G,A:G,A:G,A:G,A:G,A:G,A:G,A:G,A:G
AT5G40810	CYC12	+	AT5G40810.1,AT5G40810.2	129.8983464,0.6273154	7	5_16342435,5_16341678,5_16341138,5_16340939,5_16342266,5_16342381,5_16342453	3.52e-70,8.55e-12,4.62e-08,5.65e-05,0.000156,0.000625,0.00265	0.141,0.016,0.0912,0.0116,0.0258,0.0075,0.0095	17.7,3.67,1.39,2.63,2.39,13.3,13	A:G,A:G,A:G,A:G,A:G,A:G,A:G
AT3G62250	RPS27AC	+	AT3G62250.1	830.5734372	14	3_23037596,3_23037592,3_23037217,3_23037322,3_23037620,3_23037605,3_23037565,3_23037448,3_23037564,3_23037385,3_23037382,3_23037283,3_23037626,3_23037510	6.11e-70,1.75e-16,9.15e-14,1.62e-11,2.62e-11,9.32e-09,6.35e-08,1.96e-07,5.22e-07,1.04e-06,0.000275,0.00148,0.00611,0.00745	0.0277,0.006,0.00553,0.00398,0.00669,0.00421,0.00599,0.00479,0.00292,0.00131,0.000878,0.0018,0.00249,0.00233	4.51,4.61,3.61,2.8,3.23,3.49,1.91,2,3.04,4.82,4.24,1.93,2.25,2.32	A:G,A:G,A:G,A:G,A:G,A:G,A:G,A:G,A:G,A:G,A:G,A:G,A:G,A:G
AT3G17240	LPD2	-	AT3G17240.1,AT3G17240.3,AT3G17240.2	163.109051,12.1140152,6.053316	11	3_5890325,3_5890786,3_5890139,3_5891959,3_5890674,3_5890394,3_5890624,3_5890929,3_5890141,3_5890279,3_5891465	7.27e-70,2.08e-07,1.14e-05,1.51e-05,3.8e-05,4.85e-05,0.000307,0.000351,0.000685,0.00153,0.00383	0.0657,0.00739,0.00678,0.00769,0.00462,0.0051,0.00522,0.00491,0.00361,0.00243,0.00397	7.09,4.94,4.58,3.12,4.47,4.43,3.02,3.43,13.6,13,13.2	T:C,T:C,T:C,T:C,T:C,T:C,T:C,T:C,T:C,T:C,T:C
AT5G47930	RPS27D	-	AT5G47930.1	724.1565868	15	5_19406359,5_19406499,5_19406372,5_19406430,5_19406309,5_19406336,5_19406312,5_19406518,5_19406519,5_19406450,5_19407031,5_19407188,5_19406417,5_19407012,5_19406427	8.7e-70,4.26e-57,5.08e-32,1.93e-19,1.18e-18,2.3e-12,4.87e-11,5.94e-11,9.54e-06,9.98e-06,1.51e-05,4.09e-05,6.77e-05,0.000248,0.000486	0.0524,0.0229,0.019,0.0104,0.0215,0.0097,0.00987,0.00387,0.00208,0.00225,0.00186,0.00188,0.0027,0.00231,0.0017	5.83,3.44,16.1,3.81,16.2,5.64,15.1,4.68,4.73,4.61,2.82,3.35,3.19,2.51,4.11	T:C,T:C,T:C,T:C,T:C,T:C,T:C,T:C,T:C,T:C,T:C,T:C,T:C,T:C,T:C
AT2G41220	GLU2	+	AT2G41220.1	98.2805174	17	2_17188384,2_17188360,2_17188430,2_17186979,2_17188376,2_17188390,2_17188101,2_17186528,2_17187614,2_17188258,2_17187639,2_17188368,2_17184693,2_17188429,2_17188327,2_17179144,2_17188286	1.05e-69,5.13e-65,2.15e-46,1.48e-32,4.85e-19,7.36e-19,2.41e-09,3.23e-08,8.19e-07,9.81e-07,2.07e-05,0.000213,0.000683,0.000966,0.0019,0.00529,0.00559	0.139,0.103,0.0786,0.0347,0.0235,0.0265,0.00787,0.013,0.00597,0.0123,0.00778,0.00512,0.0032,0.00614,0.00332,0.021,0.00322	8.27,6.47,17.1,3.54,14.3,16.5,5.19,3.18,4.82,2.8,3.63,14.1,13.9,13.3,13.5,2.06,3.74	A:G,A:G,A:G,A:G,A:G,A:G,A:G,A:G,A:G,A:G,A:G,A:G,A:G,A:G,A:G,A:G,A:G
AT2G23350	PAB4	+	AT2G23350.1	164.1632222	22	2_9945547,2_9945662,2_9943495,2_9943420,2_9944907,2_9945588,2_9945022,2_9945862,2_9945933,2_9945840,2_9944425,2_9945678,2_9945349,2_9946000,2_9945151,2_9945987,2_9945649,2_9943333,2_9945983,2_9944700,2_9945661,2_9944382	1.35e-69,2.26e-18,9.55e-15,3.22e-10,1.44e-08,2.29e-08,6.53e-08,1.99e-07,2.22e-07,5.48e-07,1.71e-06,5.94e-06,3.59e-05,4.05e-05,9.01e-05,0.00014,0.000173,0.000837,0.000995,0.00339,0.00483,0.00723	0.084,0.018,0.0706,0.0168,0.00631,0.00777,0.00708,0.00874,0.0139,0.00915,0.0127,0.00813,0.00966,0.00799,0.00282,0.00782,0.00576,0.00475,0.00722,0.0128,0.00568,0.00614	3.96,5.23,1.82,2.44,5.14,5.09,4.19,4.92,3.5,4.01,3.93,3.38,2.06,12.7,13.3,12.7,3.08,3.32,12.5,1.2,3.19,2.97	A:G,A:G,A:G,A:G,A:G,A:G,A:G,A:G,A:G,A:G,A:G,A:G,A:G,A:G,A:G,A:G,A:G,A:G,A:G,A:G,A:G,A:G
AT4G04800	MSRB3	+	AT4G04800.1	89.7997422	5	4_2440850,4_2441008,4_2440866,4_2440564,4_2440646	2.26e-69,3.59e-13,6.1e-07,0.000421,0.000895	0.162,0.0336,0.0105,0.00439,0.00738	4.41,14.9,15.2,14.3,3.3	A:G,A:G,A:G,A:G,A:G
AT5G02610	RPL35D	+	AT5G02610.1,AT5G02610.2	337.390665,0.0280306	10	5_588309,5_588566,5_588541,5_588588,5_587763,5_588498,5_588573,5_588303,5_587770,5_588256	2.54e-69,1.59e-30,1.64e-23,8.47e-08,1.3e-07,3.87e-06,9.31e-06,0.000224,0.000352,0.00557	0.0495,0.0438,0.0271,0.0123,0.0034,0.00577,0.00824,0.00219,0.00191,0.0039	4.3,6.9,6.51,5.03,4.97,13.8,12.8,14.8,4.19,1.71	A:G,A:G,A:G,A:G,A:G,A:G,A:G,A:G,A:G,A:G
AT1G27530	AT1G27530	-	AT1G27530.1	228.4007936	11	1_9562839,1_9563862,1_9563614,1_9563430,1_9562833,1_9563742,1_9562707,1_9563793,1_9563703,1_9563755,1_9563677	2.56e-69,3.62e-59,5.07e-28,5.29e-18,3.45e-15,2.19e-10,3.07e-10,4.77e-06,0.000175,0.000453,0.00744	0.0846,0.0641,0.0235,0.0143,0.0219,0.00739,0.0231,0.00417,0.00387,0.0019,0.00194	8.13,6.31,3.71,6.16,4.49,3.74,5.43,4.7,3.09,12.7,2.84	T:C,T:C,T:C,T:C,T:C,T:C,T:C,T:C,T:C,T:C,T:C
AT5G14040	MPT3	-	AT5G14040.1	625.4680336	22	5_4530975,5_4531838,5_4530818,5_4531668,5_4530966,5_4531513,5_4531550,5_4530817,5_4532646,5_4530973,5_4532155,5_4531281,5_4532229,5_4532704,5_4531021,5_4531836,5_4530875,5_4531037,5_4531487,5_4532692,5_4530979,5_4531034	3.25e-69,1.38e-35,2.23e-30,1.84e-29,4.43e-29,2.79e-23,3.84e-15,1.66e-13,3.86e-13,8.34e-09,9.23e-09,1.41e-06,1.8e-06,2.55e-06,2.78e-06,7.99e-05,0.00013,0.000411,0.0028,0.00386,0.00684,0.0073	0.0376,0.0142,0.0419,0.0105,0.0167,0.033,0.00701,0.0167,0.00563,0.0102,0.00507,0.00194,0.0037,0.00255,0.00206,0.00241,0.00306,0.00226,0.00138,0.00386,0.00266,0.0012	8.06,5.22,15.8,4.29,5.91,2.54,2.45,13.9,4,2.74,4.33,4.74,3.52,3.49,14.3,3.18,12.8,12.8,2.69,1.8,2.79,3.74	T:C,T:C,T:C,T:C,T:C,T:C,T:C,T:C,T:C,T:C,T:C,T:C,T:C,T:C,T:C,T:C,T:C,T:C,T:C,T:C,T:C,T:C
AT4G31180	AT4G31180	+	AT4G31180.1,AT4G31180.2	70.5442298,40.250154	12	4_15159321,4_15159320,4_15156803,4_15156956,4_15158871,4_15159048,4_15157637,4_15159266,4_15155962,4_15157187,4_15158519,4_15157004	3.31e-69,1.56e-19,2.81e-15,1.34e-09,4.42e-09,1.94e-06,2.52e-05,0.000119,0.00012,0.000176,0.000423,0.00303	0.24,0.0348,0.0191,0.0144,0.0121,0.00853,0.00636,0.00711,0.0231,0.0157,0.00702,0.00333	5.59,14.9,5.01,3.85,3.58,4.76,14.5,4.36,3.02,2.03,13.2,13.9	A:G,A:G,A:G,A:G,A:G,A:G,A:G,A:G,A:G,A:G,A:G,A:G
AT5G07090	RPS4B	+	AT5G07090.1,AT5G07090.2,AT5G07090.3	535.53734,0.5226252,0.4544014	10	5_2203878,5_2203016,5_2203796,5_2203009,5_2203638,5_2203575,5_2203060,5_2203044,5_2203395,5_2203061	4.72e-69,1.37e-36,9.43e-26,1.01e-08,7.86e-06,1.52e-05,0.000259,0.00179,0.00213,0.00647	0.0428,0.0261,0.0111,0.00351,0.00334,0.0029,0.00307,0.00181,0.00253,0.00226	7.11,2.96,5.16,3.84,3.02,3.72,2.18,3.82,2.81,1.94	A:G,A:G,A:G,A:G,A:G,A:G,A:G,A:G,A:G,A:G
AT2G30050	SEC13B	+	AT2G30050.1	129.660886	9	2_12826358,2_12826384,2_12826292,2_12826306,2_12826161,2_12826431,2_12825980,2_12824531,2_12826400	5.51e-69,5.74e-17,1.02e-15,7.32e-12,7.68e-12,1.1e-09,4.66e-07,2.83e-05,4.58e-05	0.174,0.0299,0.0288,0.014,0.0184,0.017,0.0103,0.00837,0.0192	3.79,16.8,3.72,13.6,3.59,13.9,4.91,13.4,2	A:G,A:G,A:G,A:G,A:G,A:G,A:G,A:G,A:G
AT1G48850	EMB1144	-	AT1G48850.1,AT1G48850.3,AT1G48850.2	135.8607624,0.0323698,0	10	1_18065268,1_18065140,1_18065196,1_18066467,1_18065184,1_18067320,1_18065235,1_18065283,1_18065924,1_18066474	9.48e-69,1.26e-14,4.7e-10,1.27e-07,4.65e-06,8.26e-06,5.71e-05,0.000184,0.000405,0.000699	0.101,0.0298,0.0207,0.00643,0.00954,0.00563,0.0101,0.00421,0.00337,0.00261	4.31,14.7,3.37,4.12,4.64,14.3,3.88,13.2,14,13.1	T:C,T:C,T:C,T:C,T:C,T:C,T:C,T:C,T:C,T:C
AT5G50000	AT5G50000	-	AT5G50000.1,AT5G50000.2	52.9584112,1.1357262	8	5_20342749,5_20342750,5_20342751,5_20343764,5_20342748,5_20344003,5_20342830,5_20342937	1.89e-68,3.51e-57,1.89e-11,4.44e-11,9.7e-10,0.000622,0.000867,0.0011	0.51,0.36,0.0685,0.0448,0.0589,0.0168,0.0211,0.00924	4.33,6.31,14.5,3.05,14.3,2.31,3.34,13.6	T:C,T:C,T:C,T:C,T:C,T:C,T:C,T:C
AT4G11600	GPX6	-	AT4G11600.1	813.473905	2	4_7010046,4_7009977	5.95e-68,1.67e-07	0.0299,0.00276	5.47,4.94	T:C,T:C
AT3G45030	RPS20A	-	AT3G45030.1	298.3589254	7	3_16472003,3_16471988,3_16471562,3_16471981,3_16472215,3_16472197,3_16471518	6.41e-68,2.12e-22,7.78e-14,7.82e-11,3.27e-07,4.55e-05,5.42e-05	0.0363,0.0174,0.04,0.015,0.00373,0.00305,0.0226	6.31,3.16,15.2,2.62,4.91,3.63,12.9	T:C,T:C,T:C,T:C,T:C,T:C,T:C
AT4G00100	RPS13B	+	AT4G00100.1	507.1077756	23	4_37342,4_38139,4_38150,4_37541,4_37276,4_37816,4_37125,4_37559,4_37145,4_37275,4_37560,4_38147,4_37306,4_37537,4_37734,4_37776,4_37741,4_37729,4_37663,4_38122,4_37807,4_37543,4_37308	3.46e-67,9.01e-53,9.79e-37,9.55e-30,4.97e-29,4.04e-16,1.14e-14,5.84e-12,3.38e-09,6.24e-09,1.01e-08,1.79e-08,1.95e-07,2.72e-07,4.26e-07,1.39e-06,3.72e-06,5.36e-05,9.84e-05,0.000393,0.00119,0.00164,0.0018	0.0257,0.0364,0.0222,0.00982,0.0162,0.00587,0.0481,0.00294,0.0674,0.00395,0.00337,0.00538,0.0026,0.00346,0.00246,0.00332,0.00307,0.00248,0.00247,0.00187,0.00223,0.00128,0.00138	3.41,6.17,6.15,4.48,3.35,14.3,3.33,15.2,1.6,5.2,3.24,4.25,4.99,2.75,4.72,3.2,2.84,2.83,2.65,12.6,4.4,3.23,2.82	A:G,A:G,A:G,A:G,A:G,A:G,A:G,A:G,A:G,A:G,A:G,A:G,A:G,A:G,A:G,A:G,A:G,A:G,A:G,A:G,A:G,A:G,A:G
AT5G43460	AT5G43460	+	AT5G43460.2,AT5G43460.1	112.1963452,0	8	5_17461452,5_17461609,5_17461662,5_17460992,5_17461464,5_17461483,5_17461449,5_17460031	3.6e-67,2.59e-15,6.82e-14,3.83e-12,1.56e-09,4.28e-09,3.29e-05,0.000169	0.313,0.0563,0.0765,0.015,0.0141,0.0147,0.00706,0.00561	3.27,14.2,14.7,3.47,4.41,5.23,14,12.9	A:G,A:G,A:G,A:G,A:G,A:G,A:G,A:G
AT1G31812	ACBP6	-	AT1G31812.1	703.938935	25	1_11410985,1_11411554,1_11411145,1_11411351,1_11411609,1_11411097,1_11411038,1_11410984,1_11411542,1_11411558,1_11411201,1_11411608,1_11410982,1_11411401,1_11410983,1_11412106,1_11411168,1_11411005,1_11411043,1_11411096,1_11411039,1_11411074,1_11411392,1_11411361,1_11411002	4.96e-67,2.07e-31,5.5e-19,7.03e-18,2.86e-17,2.8e-16,6.07e-16,1.99e-15,3.8e-14,9.24e-14,1.63e-12,2.38e-11,2.55e-10,2.05e-07,5.29e-07,4.84e-06,1.04e-05,3.02e-05,9.47e-05,0.000124,0.000257,0.00108,0.00114,0.00128,0.0044	0.107,0.0128,0.00586,0.00448,0.00592,0.00692,0.00901,0.0238,0.00422,0.00812,0.00325,0.00274,0.0188,0.00177,0.0111,0.00345,0.00166,0.0052,0.0043,0.00172,0.00242,0.0014,0.00113,0.00124,0.00397	8.06,3.35,3.96,5.21,16.2,4.55,5.98,14.4,3.22,2.7,5.65,14.6,5.4,14.5,13.3,4.69,4.74,14.2,3.81,4.34,14.5,13.7,3.29,2.86,3.69	T:C,T:C,T:C,T:C,T:C,T:C,T:C,T:C,T:C,T:C,T:C,T:C,T:C,T:C,T:C,T:C,T:C,T:C,T:C,T:C,T:C,T:C,T:C,T:C,T:C
AT2G41630	TFIIB1	-	AT2G41630.1	72.355887	2	2_17355782,2_17355783	5.79e-67,4.22e-07	0.227,0.019	3.85,4.87	T:C,T:C
AT1G11860	GDCST	+	AT1G11860.2,AT1G11860.1,AT1G11860.3	89.6615606,68.9595056,0.0273192	5	1_4003181,1_4003106,1_4003158,1_4003061,1_4003163	7.14e-67,1.33e-08,2.86e-08,1.68e-06,0.000818	0.0616,0.00789,0.00959,0.00505,0.00386	5.78,3.84,3.25,4.82,13.8	A:G,A:G,A:G,A:G,A:G
AT2G30110	UBA1	-	AT2G30110.1	91.7118056	12	2_12852642,2_12852737,2_12852701,2_12852855,2_12852840,2_12853606,2_12852629,2_12852513,2_12852738,2_12852550,2_12855484,2_12853641	1.26e-66,4.38e-43,1.54e-22,4.57e-22,1.18e-21,3.75e-14,1.28e-05,7.73e-05,7.94e-05,0.00012,0.00607,0.00662	0.111,0.0775,0.0436,0.0457,0.0552,0.0158,0.0107,0.0173,0.00736,0.0138,0.0151,0.00347	6.44,5.44,16.2,15.9,4.34,15.8,4.57,12.4,12.6,4.34,1.8,3.62	T:C,T:C,T:C,T:C,T:C,T:C,T:C,T:C,T:C,T:C,T:C,T:C
AT1G56200	emb1303	+	AT1G56200.1,AT1G56200.2	224.830724,0.3631248	14	1_21030900,1_21031095,1_21031094,1_21031145,1_21031855,1_21031143,1_21031109,1_21031859,1_21030898,1_21030877,1_21031702,1_21030878,1_21031840,1_21031710	2.92e-66,1.59e-27,1.23e-24,4.56e-20,1.82e-15,1.21e-12,1.14e-11,1.16e-08,3.5e-06,7.94e-05,0.000168,0.000389,0.00149,0.00375	0.0608,0.374,0.0174,0.00858,0.104,0.00542,0.00688,0.0781,0.00439,0.00426,0.00525,0.00362,0.0225,0.00393	7.15,1.7,6.58,14.9,15.7,15.6,4.68,5.16,4.74,13.4,13.6,12.3,12.8,3.85	A:G,A:G,A:G,A:G,A:G,A:G,A:G,A:G,A:G,A:G,A:G,A:G,A:G,A:G
AT2G05840	PAA2	+	AT2G05840.1,AT2G05840.3,AT2G05840.2	127.4287092,0.5409956,0	6	2_2236106,2_2236008,2_2234731,2_2234605,2_2234625,2_2235737	4.25e-66,2.52e-13,1.49e-11,0.00012,0.000139,0.000232	0.143,0.0157,0.0166,0.00457,0.00478,0.00442	4.37,4.29,3.18,4.31,4.31,13.3	A:G,A:G,A:G,A:G,A:G,A:G
AT5G56150	UBC30	+	AT5G56150.1,AT5G56150.2	97.098101,4.7848188	3	5_22730835,5_22730918,5_22730367	5.34e-66,7.48e-21,2.03e-12	0.184,0.032,0.0208	3.91,6.33,5.73	A:G,A:G,A:G
AT4G14710	ARD3	-	AT4G14710.2,AT4G14710.1,AT4G14710.4,AT4G14710.3,AT4G14710.5,AT4G14710.6	242.3769246,2.3717434,0.3441222,0.0450746,0,1.1709766	5	4_8424912,4_8424877,4_8424817,4_8425314,4_8425285	5.67e-66,3.11e-33,1.41e-14,1.56e-05,6.81e-05	0.0889,0.0378,0.0252,0.00345,0.00571	7.17,16.6,14.6,13,3.21	T:C,T:C,T:C,T:C,T:C
AT3G26430	AT3G26430	+	AT3G26430.1	32.1206706	5	3_9672981,3_9673266,3_9673211,3_9673175,3_9673186	1.35e-65,1.35e-07,0.000794,0.00173,0.00563	0.0666,0.0102,0.00277,0.00316,0.00271	4.94,4.11,12.6,3.94,3.69	A:G,A:G,A:G,A:G,A:G
AT3G04920	RPS24A	+	AT3G04920.1,AT3G04920.2	480.0510568,0.3976544	4	3_1362228,3_1361563,3_1362145,3_1361376	1.55e-65,5.76e-44,1.75e-36,1.32e-32	0.128,0.0145,0.0329,0.00889	5.28,6.41,5.22,6.98	A:G,A:G,A:G,A:G
AT3G52220	AT3G52220	-	AT3G52220.1	48.6737458	1	3_19369525	3.01e-65	0.629	2.51	T:C
AT1G54580	ACP2	+	AT1G54580.1	344.2519048	9	1_20390865,1_20390864,1_20390668,1_20390943,1_20390662,1_20390005,1_20390769,1_20390955,1_20390240	3.37e-65,3.78e-27,4.34e-16,3.15e-13,2.03e-07,0.000223,0.000818,0.00195,0.00427	0.0585,0.0261,0.0122,0.0372,0.00397,0.00169,0.00344,0.0119,0.00223	6.01,4.83,2.89,5.69,3.65,3.48,2.62,11.9,1.91	A:G,A:G,A:G,A:G,A:G,A:G,A:G,A:G,A:G
AT5G20520	WAV2	-	AT5G20520.1	62.6892478	7	5_6943667,5_6946305,5_6943689,5_6946397,5_6943515,5_6946214,5_6944327	3.38e-65,2.12e-23,1.2e-07,1.28e-06,1.9e-05,2.69e-05,0.00285	0.236,0.104,0.0199,0.047,0.0167,0.0093,0.00786	4.14,3.23,5.07,3.62,3.83,13.1,3.98	T:C,T:C,T:C,T:C,T:C,T:C,T:C
AT4G01480	PPA5	+	AT4G01480.1,AT4G01480.2	217.8423912,0.663342	2	4_627833,4_627556	5.39e-65,0.000536	0.0845,0.00263	7.98,12.5	A:G,A:G
AT1G60070	AT1G60070	-	AT1G60070.1,AT1G60070.2	37.5262102,0	6	1_22143939,1_22144441,1_22143832,1_22143187,1_22143013,1_22143216	8.66e-65,3.39e-37,1.45e-12,1.64e-07,4.51e-05,0.000612	0.36,0.141,0.0466,0.0231,0.0215,0.0125	4.84,6.2,5.65,14.4,4.51,13.5	T:C,T:C,T:C,T:C,T:C,T:C
AT5G13780	AT5G13780	-	AT5G13780.1	245.4221282	24	5_4447634,5_4448482,5_4447552,5_4448307,5_4448362,5_4447381,5_4448356,5_4447787,5_4447790,5_4447545,5_4447734,5_4448591,5_4447488,5_4448392,5_4448527,5_4447652,5_4447555,5_4447627,5_4447689,5_4447598,5_4448330,5_4447846,5_4448407,5_4447849	1.28e-64,1.33e-49,8.52e-26,1.44e-23,1.31e-17,1.18e-15,2.34e-15,1.69e-12,1e-10,8.4e-09,1.22e-08,4.57e-07,1.45e-05,2.53e-05,3.67e-05,6.1e-05,7.1e-05,0.000115,0.000144,0.000149,0.000878,0.00119,0.00122,0.00315	0.0759,0.0348,0.0276,0.0204,0.0106,0.113,0.00939,0.0134,0.0133,0.00937,0.012,0.0125,0.0077,0.00476,0.0029,0.00584,0.0058,0.00439,0.00523,0.00634,0.0051,0.00443,0.00354,0.00263	4.57,4.13,15.2,5.59,15.2,5.02,5.91,15.5,3.77,15,4.29,3.02,12.7,3.11,12.7,3.62,14.3,13.3,4.32,3.1,2.21,2.84,3.37,3.88	T:C,T:C,T:C,T:C,T:C,T:C,T:C,T:C,T:C,T:C,T:C,T:C,T:C,T:C,T:C,T:C,T:C,T:C,T:C,T:C,T:C,T:C,T:C,T:C
AT1G27450	APT1	+	AT1G27450.4,AT1G27450.1,AT1G27450.2,AT1G27450.3	447.9606314,38.3398116,2.8194436,1.6666676	14	1_9533929,1_9533931,1_9533930,1_9533368,1_9533807,1_9533810,1_9532946,1_9533820,1_9533913,1_9533851,1_9533927,1_9533380,1_9534039,1_9533614	1.43e-64,8.42e-21,1.09e-19,8.46e-16,1.8e-14,6.36e-13,1.27e-08,3.59e-06,1.07e-05,1.35e-05,7.14e-05,0.000932,0.00238,0.00393	0.0688,0.0217,0.0205,0.0103,0.00756,0.00599,0.00451,0.00343,0.00586,0.00343,0.005,0.0024,0.0248,0.00147	6.03,6.35,6.27,2.97,4.97,5.7,3.53,4.72,4.66,4.6,13.5,2.67,13,3.02	A:G,A:G,A:G,A:G,A:G,A:G,A:G,A:G,A:G,A:G,A:G,A:G,A:G,A:G
AT4G29210	GGT3	+	AT4G29210.1,AT4G29210.2	39.8447062,3.0403728	2	4_14403281,4_14402699	1.52e-64,0.0011	0.401,0.0305	3.99,2.41	A:G,A:G
AT2G44100	GDI1	+	AT2G44100.1,AT2G44100.2	194.2868376,1.2293188	18	2_18244694,2_18243800,2_18244409,2_18244844,2_18243744,2_18244649,2_18243376,2_18244660,2_18242435,2_18244662,2_18243390,2_18244702,2_18244870,2_18242414,2_18244869,2_18243574,2_18243776,2_18243989	2.25e-64,2.19e-62,1.78e-54,1.42e-25,4.26e-22,3.1e-14,6.89e-09,2.91e-08,1.11e-06,3.05e-06,6.51e-06,5.57e-05,0.000234,0.000248,0.00025,0.00102,0.00139,0.00206	0.105,0.045,0.0428,0.0244,0.0158,0.0107,0.00996,0.00799,0.00595,0.0046,0.00847,0.00412,0.00385,0.00346,0.00554,0.00382,0.00167,0.00236	4.71,4.34,4.72,5.68,5.49,15.2,5.21,4.24,4.81,14,14.3,13.9,13.2,12.2,4.23,13.2,11.9,3.18	A:G,A:G,A:G,A:G,A:G,A:G,A:G,A:G,A:G,A:G,A:G,A:G,A:G,A:G,A:G,A:G,A:G,A:G
AT3G54880	AT3G54880	-	AT3G54880.1	102.017333	9	3_20337672,3_20337481,3_20337869,3_20337043,3_20337479,3_20337687,3_20337008,3_20337231,3_20337044	2.35e-64,1.08e-27,2.47e-26,2.99e-21,8.53e-11,8.97e-11,6.52e-10,2.87e-07,0.000524	0.101,0.0673,0.0386,0.0389,0.0198,0.0181,0.0216,0.00825,0.00671	4.72,5.29,6.72,6.44,5.52,16.1,14.3,4.98,12.6	T:C,T:C,T:C,T:C,T:C,T:C,T:C,T:C,T:C
AT4G37910	HSP70-9	-	AT4G37910.1,AT4G37910.2	160.727318,1.9798756	12	4_17825357,4_17825929,4_17825325,4_17825376,4_17826373,4_17826440,4_17825511,4_17825385,4_17825896,4_17825343,4_17825356,4_17825886	3.01e-64,2.36e-11,3.43e-07,4.45e-06,5.61e-05,9.18e-05,0.000254,0.000589,0.00208,0.00241,0.00497,0.00638	0.106,0.0928,0.00976,0.00842,0.0231,0.0145,0.00895,0.00461,0.00202,0.00512,0.00401,0.00602	5.42,1.47,13,4.64,2.03,1.85,2.52,13.9,12.7,3.87,11.7,1.67	T:C,T:C,T:C,T:C,T:C,T:C,T:C,T:C,T:C,T:C,T:C,T:C
AT2G47110	RPS27AB	+	AT2G47110.1,AT2G47110.2	851.0851456,273.9056092	7	2_19345038,2_19345167,2_19345037,2_19345073,2_19344868,2_19344936,2_19345128	4.73e-64,8.9e-44,6.44e-16,7.64e-07,8.98e-05,0.00605,0.00704	0.0277,0.0235,0.0453,0.00408,0.00215,0.000971,0.00129	3.02,5.88,1.29,2.55,2.26,2.64,3.74	A:G,A:G,A:G,A:G,A:G,A:G,A:G
AT5G06140	SNX1	-	AT5G06140.1	53.3712436	4	5_1856538,5_1857077,5_1858709,5_1857364	4.73e-64,4.42e-20,0.000178,0.00104	0.253,0.167,0.0171,0.0141	4.84,2.45,4.34,4.13	T:C,T:C,T:C,T:C
AT3G27090	AT3G27090	+	AT3G27090.1,AT3G27090.3,AT3G27090.2	148.3024796,1.4513714,0.1066522	6	3_9991576,3_9991612,3_9991611,3_9991443,3_9991406,3_9991564	5.79e-64,6.28e-17,9.84e-08,2.49e-05,0.000524,0.00156	0.11,0.0283,0.0125,0.00805,0.0038,0.0122	6.97,15.2,13.4,4.56,13.2,2.22	A:G,A:G,A:G,A:G,A:G,A:G
AT4G30210	ATR2	+	AT4G30210.2,AT4G30210.3,AT4G30210.1	88.1389952,0.2144092,0.0428926	4	4_14800572,4_14800564,4_14799337,4_14800538	7.37e-64,2.56e-07,8.76e-05,0.000514	0.104,0.011,0.0115,0.00614	7.98,13.2,3.18,12.4	A:G,A:G,A:G,A:G
AT4G24190	SHD	-	AT4G24190.1,AT4G24190.2	214.6184316,37.6590694	6	4_12551926,4_12551915,4_12551908,4_12551889,4_12552019,4_12551959	7.75e-64,4.83e-28,1.88e-06,0.000144,0.000343,0.000919	0.101,0.0309,0.0059,0.00403,0.00374,0.00238	6.05,5.75,14.7,14.2,3.82,13	T:C,T:C,T:C,T:C,T:C,T:C
AT5G09225	AT5G09225	-	AT5G09225.1	35.8434772	8	5_2870379,5_2870331,5_2870401,5_2870329,5_2870381,5_2870616,5_2870382,5_2869422	8.35e-64,2.57e-42,1.31e-32,5.09e-08,4.78e-05,9.75e-05,0.000431,0.00124	0.369,0.214,0.128,0.022,0.0203,0.0167,0.0146,0.0675	3.11,3.15,5.25,14.4,12.8,12.6,12.4,4.16	T:C,T:C,T:C,T:C,T:C,T:C,T:C,T:C
AT1G57660	RPL21F	+	AT1G57660.1	538.4790556	6	1_21356131,1_21356122,1_21356330,1_21355771,1_21355694,1_21355729	9.21e-64,3.53e-17,7.77e-09,3.39e-05,0.000598,0.000653	0.0276,0.00739,0.00935,0.00193,0.00119,0.00192	3.68,3.53,3.89,14.2,4.13,3.39	A:G,A:G,A:G,A:G,A:G,A:G
AT1G22840	CYTC-1	+	AT1G22840.1,AT1G22840.2	835.9638126,0	11	1_8080258,1_8080063,1_8080282,1_8080281,1_8080001,1_8080264,1_8079448,1_8080104,1_8079381,1_8080069,1_8080026	1.41e-63,9.33e-37,3.72e-36,1.31e-20,2.71e-07,2.16e-06,3.52e-05,0.000144,0.000283,0.00207,0.00234	0.0236,0.0153,0.0158,0.00788,0.0019,0.00262,0.00101,0.00255,0.00154,0.00218,0.00117	5.08,3.75,5.23,6.32,4.08,3.93,15.1,2.27,14.3,2.76,2.85	A:G,A:G,A:G,A:G,A:G,A:G,A:G,A:G,A:G,A:G,A:G
AT5G13450	ATP5	-	AT5G13450.1,AT5G13450.2	528.8110716,0.0423042	14	5_4310549,5_4311368,5_4311167,5_4310606,5_4311574,5_4311317,5_4310790,5_4310547,5_4311012,5_4310604,5_4310533,5_4310960,5_4310973,5_4310614	1.5e-63,1.58e-28,2.42e-20,2.7e-10,1.51e-09,1.06e-08,2.9e-08,2.51e-07,9.91e-07,4.46e-05,6.43e-05,0.0011,0.00258,0.00806	0.041,0.02,0.0138,0.00304,0.00532,0.00502,0.00284,0.00471,0.00255,0.00196,0.00274,0.00142,0.00264,0.00151	5.26,4.23,4.23,5.36,3.27,3.11,15.2,2.65,14.6,3.2,3.54,4.06,2.52,2.33	T:C,T:C,T:C,T:C,T:C,T:C,T:C,T:C,T:C,T:C,T:C,T:C,T:C,T:C
AT2G19750	RPS30C	+	AT2G19750.1	276.673584	7	2_8515891,2_8515809,2_8515865,2_8515778,2_8515815,2_8515256,2_8515913	1.84e-63,2.82e-29,4.65e-09,3.13e-05,5.2e-05,0.00166,0.00212	0.0627,0.0188,0.00732,0.00346,0.0041,0.00371,0.00512	7.95,5.29,15.1,4.4,3.57,2.54,3.2	A:G,A:G,A:G,A:G,A:G,A:G,A:G
AT4G31340	AT4G31340	+	AT4G31340.1,AT4G31340.2	175.9234102,0.1948126	18	4_15208977,4_15209330,4_15209359,4_15208895,4_15209377,4_15208396,4_15208875,4_15209400,4_15208922,4_15209457,4_15206245,4_15208946,4_15208877,4_15207369,4_15208876,4_15208883,4_15208379,4_15207351	2.15e-63,5e-46,4.03e-34,6.21e-26,8.09e-16,2.94e-15,1.49e-14,7.62e-09,1.38e-08,1.76e-07,2.44e-07,3.15e-07,6.68e-07,1.5e-06,2.61e-06,0.000966,0.0011,0.00397	0.427,0.0572,0.0466,0.0198,0.0294,0.0156,0.0117,0.0145,0.00766,0.0227,0.00964,0.00568,0.00527,0.0717,0.00465,0.00538,0.00442,0.00368	3.05,7.47,7.06,15.6,6.01,5.03,5.84,13.7,15.2,14.3,3.07,13.7,14.2,1.58,14,2.65,4.05,3.1	A:G,A:G,A:G,A:G,A:G,A:G,A:G,A:G,A:G,A:G,A:G,A:G,A:G,A:G,A:G,A:G,A:G,A:G
AT1G48030	LPD1	-	AT1G48030.5,AT1G48030.2,AT1G48030.4,AT1G48030.1,AT1G48030.3	75.3086432,28.7028494,18.309457,0.0557546,0.0150546	11	1_17717284,1_17717311,1_17717276,1_17717288,1_17717448,1_17717491,1_17717309,1_17717680,1_17717228,1_17717443,1_17717682	2.48e-63,1.42e-61,1.83e-19,1.31e-12,9.42e-12,3.44e-08,5.76e-08,4.39e-07,4.44e-06,2.78e-05,0.000428	0.455,0.231,0.123,0.0502,0.0262,0.0102,0.0193,0.00643,0.0237,0.0117,0.00378	3.28,4.71,6.42,4.82,3.86,15.2,14.1,13.9,13,4.53,14.2	T:C,T:C,T:C,T:C,T:C,T:C,T:C,T:C,T:C,T:C,T:C
AT5G65110	ACX2	-	AT5G65110.1,AT5G65110.2	98.3274838,1.5276118	3	5_26009924,5_26009920,5_26009942	2.7e-63,7.86e-46,1.02e-37	0.114,0.0879,0.0618	4.91,5.03,5.68	T:C,T:C,T:C
AT2G46540	AT2G46540	-	AT2G46540.1	302.575916	6	2_19110579,2_19110503,2_19110692,2_19110567,2_19110696,2_19110569	3.07e-63,5.39e-09,5.25e-07,5.51e-06,0.00019,0.000441	0.133,0.113,0.0054,0.0166,0.00239,0.0101	17,13.9,3.41,13.9,13,13.1	T:C,T:C,T:C,T:C,T:C,T:C
AT5G20720	CPN21	+	AT5G20720.1,AT5G20720.2,AT5G20720.3,AT5G20720.4	380.457358,7.5474012,4.5723278,1.0487482	9	5_7015059,5_7016311,5_7015015,5_7015613,5_7015600,5_7015891,5_7015060,5_7016189,5_7015888	4.1e-63,1.79e-48,1.41e-06,2.26e-05,8.19e-05,0.000358,0.00115,0.00332,0.00467	0.0575,0.102,0.0107,0.00232,0.00409,0.00315,0.00161,0.00207,0.00231	2.74,2.49,2.99,12.5,2.77,3.44,11.9,3.88,3.07	A:G,A:G,A:G,A:G,A:G,A:G,A:G,A:G,A:G
AT1G49600	RBP47A	-	AT1G49600.1,AT1G49600.3,AT1G49600.2	109.5523306,0.5457836,0.1241622	13	1_18357112,1_18357211,1_18357150,1_18359116,1_18357170,1_18357172,1_18356931,1_18357084,1_18358848,1_18358758,1_18357090,1_18357041,1_18358923	5.29e-63,9.28e-48,1.59e-34,8.97e-15,1.64e-12,4.58e-12,1.66e-10,3.56e-08,0.000121,0.000303,0.000598,0.00082,0.00395	0.114,0.0925,0.0699,0.0459,0.0189,0.0205,0.1,0.0158,0.00702,0.00722,0.00813,0.00947,0.00678	7.97,4.54,6.15,3.02,14,14.7,13.7,13.8,12.6,12.6,13.4,13.1,3.84	T:C,T:C,T:C,T:C,T:C,T:C,T:C,T:C,T:C,T:C,T:C,T:C,T:C
AT3G15000	MORF8	+	AT3G15000.1	204.901402	9	3_5052177,3_5052030,3_5052321,3_5052205,3_5051732,3_5051769,3_5052078,3_5052044,3_5052244	6.26e-63,1.68e-30,1.07e-12,2.08e-12,1.25e-10,4.92e-06,7.4e-06,0.0016,0.00445	0.0947,0.0318,0.054,0.0234,0.0819,0.00823,0.00575,0.00334,0.00682	5.95,6.89,5.65,5.61,1.76,3.08,4.62,3.97,3.79	A:G,A:G,A:G,A:G,A:G,A:G,A:G,A:G,A:G
AT3G12800	SDRB	-	AT3G12800.1	165.8936404	8	3_4063567,3_4063470,3_4063586,3_4063778,3_4063541,3_4064336,3_4063724,3_4063904	6.55e-63,1.28e-33,1.55e-10,1.12e-08,3.7e-07,2.27e-05,0.005,0.0077	0.105,0.0748,0.0186,0.0117,0.0139,0.00548,0.00322,0.00644	8.03,7,4.05,3.82,3.59,13.7,3.78,2.3	T:C,T:C,T:C,T:C,T:C,T:C,T:C,T:C
AT4G31750	WIN2	-	AT4G31750.2,AT4G31750.3,AT4G31750.1	13.3074138,13.1472702,1.6317088	2	4_15364782,4_15364853	7.12e-63,1.5e-20	0.247,0.0592	6.06,16.4	T:C,T:C
AT2G30970	ASP1	+	AT2G30970.1,AT2G30970.2	64.431425,103.6229142	13	2_13181460,2_13181660,2_13179476,2_13178982,2_13181075,2_13180979,2_13179132,2_13180345,2_13180172,2_13180258,2_13181395,2_13181262,2_13181668	7.66e-63,1.46e-14,7.07e-14,1.17e-12,4.65e-10,2.08e-08,4.59e-08,1.01e-07,3.27e-07,0.000226,0.000297,0.000458,0.000971	0.0705,0.0189,0.0124,0.0806,0.0114,0.00832,0.0116,0.0153,0.0115,0.0133,0.00378,0.00573,0.0063	5.98,4.95,4.89,3.01,4.5,5.15,3.18,5.07,3.1,2.79,13.7,3.42,2.89	A:G,A:G,A:G,A:G,A:G,A:G,A:G,A:G,A:G,A:G,A:G,A:G,A:G
AT1G14610	VALRS	-	AT1G14610.1	48.2399364	4	1_5008418,1_5008468,1_5010739,1_5009085	8.05e-63,4.72e-20,5.26e-08,0.0013	0.519,0.0763,0.0252,0.00731	8.19,14.7,5.09,13.2	T:C,T:C,T:C,T:C
AT1G18540	RPL6A	-	AT1G18540.1	422.6882462	2	1_6377449,1_6377566	8.34e-63,2.3e-17	0.12,0.00776	2.9,6.14	T:C,T:C
AT5G27380	GSH2	-	AT5G27380.1	61.0850806	11	5_9668464,5_9668470,5_9668440,5_9669948,5_9668121,5_9669315,5_9668736,5_9668085,5_9668238,5_9668969,5_9668463	1.1e-62,4.03e-41,1.25e-12,3.1e-11,3.57e-11,1.14e-10,1.97e-09,3.33e-07,3.15e-06,0.00216,0.00547	0.117,0.142,0.0216,0.034,0.0426,0.0374,0.0337,0.0424,0.0231,0.00822,0.00577	6.42,3.78,14.8,5.56,13.8,5.4,3.83,13.8,3.91,2.81,3.8	T:C,T:C,T:C,T:C,T:C,T:C,T:C,T:C,T:C,T:C,T:C
AT3G52580	RPS14C	+	AT3G52580.1	244.4857448	8	3_19504792,3_19504321,3_19504279,3_19504705,3_19504428,3_19503669,3_19504509,3_19504252	3.4e-62,1.9e-30,1.63e-10,1.59e-08,7.7e-07,2.55e-05,0.000379,0.00149	0.136,0.0618,0.668,0.0213,0.00498,0.00448,0.00264,0.00176	17.1,2.44,1.32,2.69,4.02,3.72,13.2,14	A:G,A:G,A:G,A:G,A:G,A:G,A:G,A:G
AT5G62530	ALDH12A1	-	AT5G62530.1	112.0145972	14	5_25099681,5_25099607,5_25100017,5_25101351,5_25099573,5_25099675,5_25099598,5_25099574,5_25101350,5_25099769,5_25100479,5_25100903,5_25100506,5_25099766	3.87e-62,8.22e-16,8.77e-11,1.12e-10,2.61e-08,8.98e-07,4.73e-06,1.27e-05,1.89e-05,0.000497,0.000993,0.00155,0.00391,0.00684	0.0706,0.0256,0.0134,0.0125,0.0314,0.00691,0.0115,0.0171,0.0125,0.00318,0.00554,0.0037,0.00512,0.0031	6.97,14.5,16,15.5,14.8,4.84,13.9,13.9,3.31,13.5,12.3,13.1,3.89,3.74	T:C,T:C,T:C,T:C,T:C,T:C,T:C,T:C,T:C,T:C,T:C,T:C,T:C,T:C
AT2G01970	TMN3	-	AT2G01970.1	85.8921858	6	2_452114,2_452118,2_452111,2_452117,2_453168,2_452855	7.17e-62,1.28e-45,6.84e-16,1.88e-08,4.07e-08,6.14e-07	0.162,0.128,0.0369,0.0234,0.0298,0.0179	7,5.58,15.7,14.4,3.04,3.26	T:C,T:C,T:C,T:C,T:C,T:C
AT4G31990	ASP5	-	AT4G31990.2,AT4G31990.1,AT4G31990.4,AT4G31990.3	159.0994216,20.1110812,0.0259874,5.0470008	7	4_15471090,4_15470974,4_15470954,4_15472534,4_15471180,4_15472891,4_15471343	7.4e-62,1.73e-17,6.03e-11,0.001,0.00137,0.00161,0.00271	0.403,0.0306,0.019,0.00994,0.0026,0.0107,0.0019	2.77,15.4,14.1,2.61,4.04,2.4,3.93	T:C,T:C,T:C,T:C,T:C,T:C,T:C
AT4G35230	BSK1	-	AT4G35230.1	25.9402514	1	4_16755490	1.42e-61	0.443	2.52	T:C
AT2G17800	ARAC1	+	AT2G17800.1,AT2G17800.2	31.3641242,3.2963384	4	2_7741705,2_7742018,2_7740691,2_7740843	1.89e-61,6.98e-05,0.00352,0.0073	0.211,0.0741,0.0153,0.0133	4.59,4.39,12.2,3	A:G,A:G,A:G,A:G
AT3G61110	RPS27B	+	AT3G61110.1	508.7256928	3	3_22612550,3_22611708,3_22612549	1.89e-61,1.83e-36,6.97e-06	0.0337,0.0275,0.00187	3.11,3.06,14.1	A:G,A:G,A:G
AT5G08060	AT5G08060	+	AT5G08060.1	225.2986416	18	5_2582194,5_2582216,5_2582473,5_2580859,5_2582514,5_2582193,5_2580883,5_2580718,5_2580826,5_2580810,5_2582511,5_2582505,5_2582520,5_2580889,5_2580919,5_2580666,5_2582498,5_2582428	1.96e-61,2.68e-41,1.18e-20,1.81e-15,2.9e-06,4.64e-06,5.74e-06,7.52e-06,1.7e-05,2.86e-05,6.95e-05,9.2e-05,0.000345,0.000489,0.000715,0.00116,0.00119,0.00143	0.0385,0.0305,0.348,0.0106,0.167,0.00391,0.00311,0.00449,0.00254,0.00193,0.118,0.109,0.16,0.00203,0.00225,0.00187,0.0797,0.0485	17.1,7.28,6.46,3.57,13.1,14.2,4.68,2.44,15,13.6,12.5,12.3,4.2,14.2,4.14,3.81,13.3,12.5	A:G,A:G,A:G,A:G,A:G,A:G,A:G,A:G,A:G,A:G,A:G,A:G,A:G,A:G,A:G,A:G,A:G,A:G
AT1G69620	RPL34B	+	AT1G69620.1	902.1235812	14	1_26190107,1_26190809,1_26191077,1_26191131,1_26191085,1_26190851,1_26191145,1_26191102,1_26189952,1_26191185,1_26190899,1_26190109,1_26191122,1_26189919	2.2e-61,4.15e-46,1.02e-16,1.93e-13,3.05e-10,1.51e-06,1.64e-06,7.64e-06,2.66e-05,0.000365,0.000657,0.00159,0.00326,0.00487	0.013,0.0424,0.00802,0.0117,0.00402,0.00194,0.00458,0.00278,0.00122,0.00412,0.0021,0.000853,0.00259,0.00201	5.65,2.94,4.29,4.3,14.7,3.53,13.5,15.2,13.5,4.23,2.73,3.26,3.15,2.23	A:G,A:G,A:G,A:G,A:G,A:G,A:G,A:G,A:G,A:G,A:G,A:G,A:G,A:G
AT4G09830	AT4G09830	+	AT4G09830.1	140.0906386	12	4_6188910,4_6190373,4_6190391,4_6190372,4_6190413,4_6190152,4_6190419,4_6190349,4_6190422,4_6190401,4_6190517,4_6190594	9.86e-61,2.26e-26,1.15e-25,4.38e-18,1e-13,9.62e-09,1.03e-06,3.02e-05,4.18e-05,6.13e-05,0.000271,0.000372	0.0755,0.0385,0.167,0.0235,0.0192,0.00709,0.00917,0.00702,0.0123,0.00789,0.00857,0.0118	6.01,17.2,2.72,14.5,14.7,14.1,13.1,4.58,3.01,4.51,13,13.5	A:G,A:G,A:G,A:G,A:G,A:G,A:G,A:G,A:G,A:G,A:G,A:G
AT1G22520	AT1G22520	-	AT1G22520.1,AT1G22520.2	80.4405272,0.1876056	4	1_7953853,1_7954235,1_7954264,1_7953829	1.17e-60,6.51e-39,1.7e-08,0.000987	0.0859,0.162,0.0225,0.00512	6.9,2.7,3.46,12.2	T:C,T:C,T:C,T:C
AT5G44720	AT5G44720	+	AT5G44720.1,AT5G44720.2	59.2669876,15.7444344	4	5_18045042,5_18044759,5_18045266,5_18044035	1.18e-60,2.46e-22,2.42e-08,0.00838	0.209,0.096,0.0539,0.00678	5.19,4.14,14.1,2.96	A:G,A:G,A:G,A:G
AT5G66680	OST48	-	AT5G66680.1	150.229834	12	5_26618192,5_26620390,5_26619190,5_26619477,5_26618491,5_26619426,5_26619882,5_26617805,5_26618244,5_26618187,5_26618229,5_26619482	1.75e-60,4.24e-11,8.12e-10,1.08e-09,4.44e-09,7.29e-09,1.04e-07,8.89e-07,9.36e-07,2.27e-06,4.15e-06,3.28e-05	0.0623,0.0295,0.0336,0.00812,0.00831,0.0175,0.00661,0.00991,0.004,0.00389,0.00417,0.00549	3.85,2.38,2.61,15.3,14.3,2.91,4.14,13.7,15.7,13.8,14.3,3.69	T:C,T:C,T:C,T:C,T:C,T:C,T:C,T:C,T:C,T:C,T:C,T:C
AT5G26667	UMK3	+	AT5G26667.2,AT5G26667.4,AT5G26667.3	188.0695102,0.0643456,0.0561568	3	5_9278113,5_9278359,5_9278108	2.61e-60,2.93e-06,4.09e-06	0.355,0.0064,0.00609	3.42,13.9,14.4	A:G,A:G,A:G
AT5G27395	AT5G27395	-	AT5G27395.1,AT5G27395.2	19.114412,7.5698888	2	5_9671750,5_9671578	3.81e-60,1e-04	0.398,0.129	6.95,12.4	T:C,T:C
AT5G17770	CBR1	-	AT5G17770.1	244.2218596	20	5_5865390,5_5865428,5_5865391,5_5865755,5_5865440,5_5864571,5_5866088,5_5864604,5_5864843,5_5864394,5_5864839,5_5866130,5_5865649,5_5864327,5_5864383,5_5864872,5_5864550,5_5864913,5_5864414,5_5864884	4.55e-60,6.82e-26,7.3e-26,3.06e-14,5.23e-14,3.52e-13,2.63e-09,9.35e-09,1.44e-07,2.3e-07,1.48e-05,2.54e-05,3.3e-05,0.000147,0.000171,0.000234,0.000247,0.000914,0.00245,0.00281	0.0372,0.0958,0.0149,0.00967,0.115,0.00765,0.00678,0.00775,0.00383,0.0219,0.00327,0.0517,0.0033,0.0381,0.0133,0.00278,0.00327,0.00203,0.00981,0.00298	4.85,2.39,4.81,4.44,1.7,14.1,3.32,5.19,15.6,4.97,4.58,1.15,4.47,12.2,13.5,4.27,4.24,13.3,3.95,2.76	T:C,T:C,T:C,T:C,T:C,T:C,T:C,T:C,T:C,T:C,T:C,T:C,T:C,T:C,T:C,T:C,T:C,T:C,T:C,T:C
AT5G27700	RPS21C	-	AT5G27700.1	603.23129	16	5_9807569,5_9808073,5_9807490,5_9807473,5_9807880,5_9808006,5_9807550,5_9808041,5_9807824,5_9807807,5_9807563,5_9807798,5_9808043,5_9808063,5_9807566,5_9808044	9.23e-60,7.22e-53,2.73e-48,1.44e-34,2.33e-21,5.51e-16,1.57e-14,1.91e-11,1.75e-10,9.99e-09,3.65e-08,2.35e-07,3.3e-07,0.000275,0.000396,0.000417	0.0271,0.0351,0.0329,0.0259,0.0536,0.00472,0.0102,0.0101,0.00357,0.00435,0.00518,0.00214,0.00392,0.00227,0.0021,0.00547	5.42,4.06,6.58,16.6,2.23,5.98,5.84,2.78,4.52,3.64,2.84,14.3,3.3,14.8,3.28,2.41	T:C,T:C,T:C,T:C,T:C,T:C,T:C,T:C,T:C,T:C,T:C,T:C,T:C,T:C,T:C,T:C
AT5G26830	THRRS	+	AT5G26830.1	62.451219	4	5_9440831,5_9438735,5_9439990,5_9440674	9.74e-60,8.06e-12,7.7e-06,4.7e-05	0.127,0.0413,0.0109,0.0117	4.44,3.38,4.61,3.6	A:G,A:G,A:G,A:G
AT5G64440	FAAH	+	AT5G64440.1	36.3925836	5	5_25770278,5_25767853,5_25770325,5_25770295,5_25770066	1.14e-59,2.81e-11,2.83e-09,0.000106,0.000179	0.331,0.0407,0.0767,0.0265,0.0177	5.97,15.1,14.7,13.6,12.5	A:G,A:G,A:G,A:G,A:G
AT1G70490	ARF2-A	-	AT1G70490.1,AT1G70490.2,AT1G70490.3,AT1G70490.7,AT1G70490.5,AT1G70490.4,AT1G70490.6	224.6676006,57.6602208,3.4487258,0.626331,0.3958212,0.2443168,0	2	1_26564276,1_26564091	1.15e-59,0.00857	0.0489,0.00472	16.9,13.4	T:C,T:C
AT3G08580	AAC1	-	AT3G08580.2,AT3G08580.1	1783.7837188,236.8554382	34	3_2605803,3_2606269,3_2606602,3_2605915,3_2605892,3_2606699,3_2606295,3_2605912,3_2605842,3_2605612,3_2606282,3_2606844,3_2606239,3_2606907,3_2605632,3_2605884,3_2606903,3_2605830,3_2606807,3_2605755,3_2606747,3_2606421,3_2605662,3_2605707,3_2605881,3_2605732,3_2605725,3_2606815,3_2605728,3_2605818,3_2605838,3_2606591,3_2605595,3_2606304	1.2e-59,1.17e-51,7.7e-41,4.01e-31,6.99e-30,1.61e-25,1.12e-21,1.95e-20,4.48e-15,9.58e-15,1.98e-14,3.02e-09,1.01e-07,1.56e-06,1.84e-06,1.95e-06,2.24e-06,3.17e-06,2.07e-05,4.48e-05,9.49e-05,0.000112,0.000167,0.000401,0.000406,0.000452,0.000788,0.000878,0.00105,0.00167,0.00174,0.00257,0.00268,0.00541	0.202,0.0357,0.00619,0.00475,0.00453,0.00446,0.00412,0.00299,0.00298,0.00455,0.0032,0.00206,0.00154,0.00194,0.00173,0.00133,0.00111,0.00135,0.00109,0.000886,0.00075,0.0011,0.00128,0.00127,0.000536,0.000825,0.00128,0.00112,0.00062,0.0012,0.00139,0.000531,0.00116,0.000421	3.5,2.32,4.19,4.11,4.34,3.88,3.41,4.29,4.22,4.99,2.9,3.12,2.63,2.2,14.4,2.69,3.51,3.16,3.06,13.5,4.42,2.19,3.55,2.76,4.23,4.03,3.19,2.15,12.6,2.14,2.57,3.08,3.94,3.84	T:C,T:C,T:C,T:C,T:C,T:C,T:C,T:C,T:C,T:C,T:C,T:C,T:C,T:C,T:C,T:C,T:C,T:C,T:C,T:C,T:C,T:C,T:C,T:C,T:C,T:C,T:C,T:C,T:C,T:C,T:C,T:C,T:C,T:C
AT4G35890	LARP1C	+	AT4G35890.1,AT4G35890.2	61.337706,1.1413612	7	4_17000437,4_17000324,4_16998617,4_16998548,4_16997875,4_17000508,4_16999050	1.28e-59,1.29e-40,2.44e-18,2.3e-13,2.1e-05,0.000403,0.00229	0.228,0.251,0.122,0.0724,0.0165,0.0192,0.00796	5.95,3.05,2.43,2.83,2.33,12.6,3.91	A:G,A:G,A:G,A:G,A:G,A:G,A:G
AT1G47530	AT1G47530	+	AT1G47530.1,AT1G47530.2	119.0682478,0.2795646	6	1_17454146,1_17452737,1_17453609,1_17454116,1_17454117,1_17453182	1.34e-59,1.33e-10,1.52e-08,7.32e-08,0.00182,0.00196	0.208,0.017,0.0088,0.0178,0.00638,0.00791	3.47,3.46,14.3,13.8,12.4,2.16	A:G,A:G,A:G,A:G,A:G,A:G
AT3G56190	ASNAP2	-	AT3G56190.1,AT3G56190.2	136.6957778,0.047864	7	3_20846106,3_20846303,3_20846481,3_20848482,3_20848429,3_20848226,3_20846468	1.36e-59,3.49e-32,3.95e-14,4.92e-05,7.74e-05,0.000504,0.00513	0.0907,0.0976,0.021,0.0282,0.0147,0.00329,0.00461	6.91,2.17,5.84,4.48,3.19,13.5,3.82	T:C,T:C,T:C,T:C,T:C,T:C,T:C
AT5G12470	AT5G12470	-	AT5G12470.1	133.9654778	21	5_4044946,5_4045113,5_4045432,5_4044937,5_4045596,5_4045367,5_4045754,5_4045089,5_4046508,5_4045118,5_4046521,5_4044934,5_4047197,5_4047031,5_4046810,5_4046857,5_4046816,5_4044938,5_4044967,5_4047258,5_4045153	1.77e-59,2.26e-28,7.41e-21,2.97e-20,2.88e-17,4.2e-16,5.67e-13,1.03e-07,1.34e-07,4.46e-07,5.3e-07,1.95e-06,1.23e-05,0.000159,0.00026,0.000328,0.000666,0.000772,0.00163,0.00191,0.00443	0.113,0.0594,0.0337,0.0389,0.0319,0.027,0.0238,0.0171,0.00701,0.0117,0.00924,0.0165,0.0109,0.0188,0.00485,0.00391,0.00394,0.00666,0.00575,0.00506,0.00613	6.28,5.26,14.8,6.28,6.08,5.96,4.78,13.8,4.27,13.3,2.94,14.4,3.3,13.2,3.48,4.33,3.32,13.5,12.3,3.92,12.9	T:C,T:C,T:C,T:C,T:C,T:C,T:C,T:C,T:C,T:C,T:C,T:C,T:C,T:C,T:C,T:C,T:C,T:C,T:C,T:C,T:C
AT4G35850	AT4G35850	+	AT4G35850.1	76.2224436	9	4_16986673,4_16986705,4_16986796,4_16986733,4_16986794,4_16986241,4_16986817,4_16986062,4_16986686	1.85e-59,9.98e-36,2.07e-18,5.38e-16,2.51e-09,1.72e-05,0.000166,0.00292,0.00334	0.158,0.167,0.192,0.0665,0.0968,0.0143,0.0829,0.0099,0.0124	16.4,7.19,14.8,14.5,13.6,4.59,13.3,3.91,14	A:G,A:G,A:G,A:G,A:G,A:G,A:G,A:G,A:G
AT3G46560	TIM9	+	AT3G46560.1	220.652368	5	3_17139181,3_17139385,3_17139352,3_17139295,3_17139242	1.96e-59,6.33e-11,4.54e-07,0.000628,0.00226	0.0599,0.0245,0.00782,0.00276,0.00742	4.23,14.4,14.8,13.3,1.62	A:G,A:G,A:G,A:G,A:G
AT5G55140	AT5G55140	+	AT5G55140.1	62.0796694	3	5_22381703,5_22381906,5_22381700	3.69e-59,7.25e-15,1.32e-05	0.145,0.34,0.012	5.17,3.02,13.4	A:G,A:G,A:G
AT2G27730	AT2G27730	-	AT2G27730.1,AT2G27730.4,AT2G27730.3,AT2G27730.2	392.5307832,5.1066778,1.2380084,0.245335	13	2_11820121,2_11820870,2_11821799,2_11820057,2_11819965,2_11820374,2_11820006,2_11819949,2_11820020,2_11820092,2_11820099,2_11820402,2_11820229	5.25e-59,1.24e-52,1.6e-45,1.75e-11,3.12e-07,8.28e-07,1.45e-05,0.000144,0.000248,0.00217,0.00275,0.00571,0.00598	0.0347,0.034,0.0421,0.00564,0.00428,0.00222,0.00263,0.00379,0.00501,0.00134,0.00153,0.00161,0.0015	4.07,4.68,3.88,4.15,13.9,14.8,13.6,13.7,3.8,3.93,3.16,3.02,3.01	T:C,T:C,T:C,T:C,T:C,T:C,T:C,T:C,T:C,T:C,T:C,T:C,T:C
AT1G05205	AT1G05205	-	AT1G05205.1	174.7745758	3	1_1509353,1_1509387,1_1509736	5.74e-59,5.02e-27,0.000668	0.0681,0.0442,0.00568	5.86,6.8,2.55	T:C,T:C,T:C
AT3G63490	RPL1	+	AT3G63490.1,AT3G63490.2	42.5750598,0.0626854	5	3_23446077,3_23446079,3_23446170,3_23446109,3_23446084	7.88e-59,3.56e-08,4.03e-05,0.000817,0.00114	0.252,0.0357,0.049,0.0222,0.0181	16.8,13.6,12.6,12.9,12.6	A:G,A:G,A:G,A:G,A:G
AT1G56330	SAR1B	-	AT1G56330.1	318.4177544	13	1_21086869,1_21086666,1_21088146,1_21086643,1_21086763,1_21086784,1_21086913,1_21086667,1_21086639,1_21086764,1_21086973,1_21086964,1_21086978	1.02e-58,3.91e-11,2.28e-09,3.24e-08,4.66e-07,9.34e-06,7.33e-05,0.000175,0.000189,0.000378,0.00105,0.00113,0.00221	0.0988,0.014,0.00646,0.0128,0.00549,0.00392,0.00371,0.00486,0.0078,0.00396,0.00197,0.00194,0.00506	3.71,5.47,5.22,15.8,13.7,14.2,3.6,13.5,12.7,4.19,12.8,12.8,2.5	T:C,T:C,T:C,T:C,T:C,T:C,T:C,T:C,T:C,T:C,T:C,T:C,T:C
AT3G04120	GAPC1	+	AT3G04120.1	1885.0493106	9	3_1083160,3_1082997,3_1082199,3_1082662,3_1081815,3_1083167,3_1082693,3_1082587,3_1082256	1.37e-58,9.2e-43,1.55e-07,3.8e-07,9.52e-06,1.18e-05,1.19e-05,0.000218,0.00468	0.016,0.00765,0.00107,0.00268,0.00182,0.00149,0.00152,0.00292,0.00158	4.76,3.28,2.96,1.89,2.17,15.2,2.07,1.04,1.53	A:G,A:G,A:G,A:G,A:G,A:G,A:G,A:G,A:G
AT1G51200	SAP2	+	AT1G51200.1,AT1G51200.2,AT1G51200.4,AT1G51200.3	262.8727858,10.6175876,5.722995,1.054684	32	1_18986195,1_18986001,1_18986241,1_18985942,1_18986187,1_18985861,1_18985829,1_18986224,1_18986154,1_18985703,1_18984738,1_18986323,1_18985851,1_18985805,1_18985780,1_18985877,1_18986324,1_18985768,1_18985821,1_18985717,1_18986340,1_18986156,1_18984521,1_18986322,1_18986108,1_18985915,1_18986174,1_18986400,1_18985986,1_18985728,1_18986083,1_18986010	2.34e-58,1.2e-48,2.15e-34,2.32e-34,8.87e-32,7.56e-31,4.45e-26,1.74e-25,4.81e-23,5.51e-21,3.86e-16,9.99e-16,5.42e-11,8.97e-11,1.41e-09,1.68e-08,4.24e-08,1.43e-07,3.49e-07,5.76e-07,2.31e-06,6.18e-06,8.76e-06,0.000339,0.000339,0.000484,0.000689,0.000747,0.0011,0.00174,0.00332,0.00532	0.0449,0.0304,0.0229,0.0207,0.0286,0.047,0.0224,0.0209,0.321,0.0135,0.0149,0.0151,0.0119,0.00662,0.00904,0.00413,0.00646,0.00663,0.00501,0.00699,0.00609,0.00411,0.00601,0.00355,0.00288,0.00317,0.00254,0.00454,0.00278,0.00214,0.00309,0.00241	5.37,5.68,5.22,5.61,3.88,2.38,3.96,4.31,2.45,4.92,5.18,3.98,2.6,4.16,3.43,5.2,5.06,4.34,3.69,3.59,4.78,4.7,13.9,4.26,4.32,2.77,13.2,12,3.34,4.04,2.52,12.5	A:G,A:G,A:G,A:G,A:G,A:G,A:G,A:G,A:G,A:G,A:G,A:G,A:G,A:G,A:G,A:G,A:G,A:G,A:G,A:G,A:G,A:G,A:G,A:G,A:G,A:G,A:G,A:G,A:G,A:G,A:G,A:G
AT2G16940	AT2G16940	-	AT2G16940.1,AT2G16940.4,AT2G16940.3,AT2G16940.5,AT2G16940.2	29.189524,1.910195,0.086202,0	6	2_7343088,2_7343029,2_7345036,2_7343237,2_7344126,2_7345056	2.76e-58,5.95e-08,1.05e-07,2.04e-05,0.000268,0.00133	0.474,0.0493,0.0931,0.0401,0.0288,0.0193	4.43,14,2.76,13.7,2.73,13.2	T:C,T:C,T:C,T:C,T:C,T:C
AT3G16950	LPD1	-	AT3G16950.1,AT3G16950.2	43.6512196,3.4867844	10	3_5786674,3_5786681,3_5786636,3_5786675,3_5786714,3_5787855,3_5786680,3_5786552,3_5786598,3_5786639	3.19e-58,1.5e-41,4.36e-39,1.49e-20,3.45e-07,3.73e-07,2.36e-05,8.71e-05,0.000152,0.00231	0.21,0.144,0.161,0.0749,0.0236,0.0156,0.0167,0.0234,0.0196,0.0158	6.28,6.33,6.29,6.31,14.9,13.8,14.4,12.9,14.6,3.91	T:C,T:C,T:C,T:C,T:C,T:C,T:C,T:C,T:C,T:C
AT1G67430	RPL17B	+	AT1G67430.1,AT1G67430.2	1075.8056782,0.1902414	18	1_25263626,1_25262967,1_25263618,1_25262481,1_25262349,1_25262961,1_25263641,1_25262960,1_25263474,1_25263692,1_25263048,1_25263452,1_25263604,1_25263005,1_25263049,1_25263053,1_25262979,1_25263310	4.53e-58,7.86e-32,9.28e-31,4.7e-24,5.2e-24,1.73e-21,9.72e-13,7.44e-11,1.78e-08,2.04e-07,2.42e-06,0.000172,0.000287,0.000411,0.000519,0.000658,0.00215,0.00497	0.0248,0.00754,0.0166,0.00914,0.164,0.0123,0.00699,0.00284,0.0049,0.00745,0.00191,0.00207,0.00138,0.00249,0.00105,0.00127,0.00101,0.00117	7.81,4.22,3.92,4.21,1.85,2.24,4.77,2.93,1.83,14.1,3.29,2.64,14.1,2.26,3.38,2.68,2.55,2.42	A:G,A:G,A:G,A:G,A:G,A:G,A:G,A:G,A:G,A:G,A:G,A:G,A:G,A:G,A:G,A:G,A:G,A:G
AT1G11930	AT1G11930	+	AT1G11930.2,AT1G11930.1	36.2022788,0.86857	6	1_4030345,1_4030382,1_4029188,1_4030398,1_4030383,1_4030348	4.71e-58,1.08e-31,3.14e-21,1.52e-10,5.86e-10,0.000968	0.419,0.662,0.242,0.124,0.12,0.0323	5.34,2.28,2.17,14,14,13.3	A:G,A:G,A:G,A:G,A:G,A:G
AT4G28470	RPN1B	-	AT4G28470.1	35.5634328	12	4_14067377,4_14067036,4_14067371,4_14067055,4_14068968,4_14067089,4_14067065,4_14067007,4_14067557,4_14067307,4_14068970,4_14068263	5.75e-58,4.2e-53,9.83e-26,5.57e-25,1.08e-15,6.54e-13,2.42e-10,0.000222,0.00112,0.0029,0.00354,0.00381	0.298,0.248,0.135,0.0964,0.0832,0.0571,0.0238,0.0215,0.0161,0.00685,0.0138,0.0307	3.71,4.41,4.48,5.16,3.9,16.1,14.4,4.26,12.3,13.1,3.86,1.74	T:C,T:C,T:C,T:C,T:C,T:C,T:C,T:C,T:C,T:C,T:C,T:C
AT5G03460	AT5G03460	+	AT5G03460.1	230.992054	8	5_865456,5_865093,5_865159,5_865572,5_864512,5_865586,5_865127,5_865569	7.8e-58,3.49e-14,1.78e-08,4.15e-07,7.48e-07,4.73e-05,8.24e-05,0.00828	0.0427,0.00875,0.00474,0.0119,0.00592,0.0138,0.00467,0.00674	5.92,5.84,13.5,13.4,4.91,13.7,3.2,3.02	A:G,A:G,A:G,A:G,A:G,A:G,A:G,A:G
AT4G18360	GLO5	-	AT4G18360.1,AT4G18360.4,AT4G18360.3,AT4G18360.2	69.1312488,3.0930758,1.5797974,0.8024698	2	4_10146698,4_10146663	1.17e-57,0.000891	0.152,0.00376	4.07,13	T:C,T:C
AT4G12590	AT4G12590	-	AT4G12590.1	110.9847962	5	4_7451292,4_7451295,4_7452279,4_7452345,4_7451171	1.31e-57,4.21e-34,6.91e-11,0.00322,0.00795	0.126,0.0775,0.0213,0.00489,0.0157	7.88,7.1,4.16,3.81,3.05	T:C,T:C,T:C,T:C,T:C
AT2G40620	AT2G40620	-	AT2G40620.1	27.0913984	2	2_16954956,2_16954821	1.31e-57,4.23e-14	0.341,0.0717	3.96,14.7	T:C,T:C
AT2G27020	PAG1	-	AT2G27020.1,AT2G27020.2	240.5539398,0.0599804	6	2_11528492,2_11528563,2_11528547,2_11528671,2_11529974,2_11528546	1.36e-57,5.56e-23,5.95e-23,6.1e-09,8.97e-06,0.000744	0.0646,0.0152,0.0167,0.00561,0.00488,0.0024	17.7,15.6,15.8,14.6,3.8,12.4	T:C,T:C,T:C,T:C,T:C,T:C
[truncated: 4,623 more rows]

## Sheet: HITS_ECT2-HT_aerial
ID	GENE	TRANSCRIPTS	NAME	STRAND	REF	TARG	PROP	COUNT	log2FC	p-adj
[truncated: 16,176 more rows]

[truncated: 1 more sheets: GENES_ECT2-HT_aerial]
