# Supplementary material for: Principles of mRNA targeting via the Arabidopsis m6A-binding protein ECT2
Source: eLife. 2021 Sep 30;10:e72375. doi: 10.7554/eLife.72375 (PMC8796052; doi:10.7554/eLife.72375)
Supplement: Supplementary file 2. [file elife-72375-supp2.xlsx]

## Sheet: Info
Supplementary File 2
ECT2-mCherry iCLIP data (from whole 12-day-old seedlings grown on vertical plates in long days)
Sheet type	Description
PEAKS	Called peaks (by PureCLIP) from the four ECT2-mCherry iCLIP libraries (110 and 55 kDa bands for WT, and 110 and 55 kDa bands for the m6A-bidning deficient ECT2-W464A control)
GENES	Genes containing the called peaks described above
PEAKS
Column headers	Description
ID	Chromosome number and coordinate of each peak
STRAND	DNA strand (unambiguos)
REF	Nucleotide corresponding to the peak location according to TAIR10
SCORE	PureCLIP score
BINDING SITE	Yes/Not according to whether the peak was selected as the dominant crosslink site (= binding site) among adjacent peaks
GENE ID	AGI
GENE NAME	Gene name
TRANSCRIPTS	Possible transcripts (Araport11) containing the peak, separated by commas and listed in order of expression
LOCATION	Location of the peak in the gene body in the different possible transcripts (in the same order as in the TRANSCRIPTS column and separated by commas )
LOCATION_PROP	A number between 0 and 1 representing how far through the gene body location (5'UTR, CDS or 3'UTR) the peak position is. E.g. Location_prop = 0.5 if it is exactly in the middle of its annotated gene body location.
TRANSCRIPTS TPM (ECT2 HT CTLs)	Expression (transcripts per million) of the annotated transcripts (in the same order as in the TRANSCRIPTS column and separated by commas) according to mRNA-Seq of seedlings of similar age (10-day-old) grown in identical conditions (average of roots+areial in the control samples of the ECT2-HT datasets). These values mean to serve as a reference for high or low expression.
GENES
Column headers	Description
GENE ID	AGI
GENE NAME	Gene name
PEAKS	Number of peaks in each gene
PEAKS IDs	Chromosome number and coordinate of all peaks found in each gene, listed in the same order as in the PEAKS column and separated by commas
STRAND	DNA strand (unambiguos)
TRANSCRIPTS	Possible transcripts (Araport11) containing the peaks, separated by commas
TRANSCRIPTS TPM (ECT2 HT CTLs)	Expression (transcripts per million) of the annotated transcripts (in the same order as in the TRANSCRIPTS column and separated by commas) according to mRNA-Seq of seedlings of similar age (10-day-old) grown in identical conditions (average of roots+areial in the control samples of the ECT2-HT datasets). These values mean to serve as a reference for high or low expression.

## Sheet: PEAKS 110kDa
ID	STRAND	REF	SCORE	BINDING SITE	GENE ID	GENE NAME	TRANSCRIPTS	LOCATION	LOCATION_PROP	TRANSCRIPTS TPM (ECT2 HT CTLs)
1_198524	+	T	0.786346	yes	AT1G01540	AT1G01540	AT1G01540.2,AT1G01540.1	3UTR,3UTR	0.3474,0.6984	30.8101106,2.8294822
1_201665	+	T	5.76863	yes	AT1G01550	BPS1	AT1G01550.1,AT1G01550.2	3UTR,3UTR	0.4472,0.4472	77.2432485,11.921764
1_230651	+	C	2.09523	yes	AT1G01630	AT1G01630	AT1G01630.1	CDS	0.7931	63.0116791
1_230705	+	T	0.793252	yes	AT1G01630	AT1G01630	AT1G01630.1	3UTR	0.0957	63.0116791
1_230715	+	T	1.8562	yes	AT1G01630	AT1G01630	AT1G01630.1	3UTR	0.1287	63.0116791
1_230784	+	T	0.346349	yes	AT1G01630	AT1G01630	AT1G01630.1	3UTR	0.3564	63.0116791
1_294947	+	T	2.58176	yes	AT1G01800	AT1G01800	AT1G01800.1,AT1G01800.2	3UTR,3UTR	0.2944,0.3841	67.9363543,0.0119928
1_294956	+	A	2.76258	yes	AT1G01800	AT1G01800	AT1G01800.1,AT1G01800.2	3UTR,3UTR	0.3401,0.4437	67.9363543,0.0119928
1_294957	+	A	0.266378	no	AT1G01800	AT1G01800	AT1G01800.1,AT1G01800.2	3UTR,3UTR	0.3452,0.4503	67.9363543,0.0119928
1_294958	+	T	0.669281	no	AT1G01800	AT1G01800	AT1G01800.1,AT1G01800.2	3UTR,3UTR	0.3503,0.457	67.9363543,0.0119928
1_294972	+	A	0.220981	yes	AT1G01800	AT1G01800	AT1G01800.1,AT1G01800.2	3UTR,3UTR	0.4213,0.5497	67.9363543,0.0119928
1_294975	+	T	2.67382	no	AT1G01800	AT1G01800	AT1G01800.1,AT1G01800.2	3UTR,3UTR	0.4365,0.5695	67.9363543,0.0119928
1_294976	+	A	2.53559	no	AT1G01800	AT1G01800	AT1G01800.1,AT1G01800.2	3UTR,3UTR	0.4416,0.5762	67.9363543,0.0119928
1_294977	+	T	17.8528	yes	AT1G01800	AT1G01800	AT1G01800.1,AT1G01800.2	3UTR,3UTR	0.4467,0.5828	67.9363543,0.0119928
1_294978	+	A	2.3004	no	AT1G01800	AT1G01800	AT1G01800.1,AT1G01800.2	3UTR,3UTR	0.4518,0.5894	67.9363543,0.0119928
1_386704	+	A	0.782612	yes	AT1G02080	AT1G02080	AT1G02080.2,AT1G02080.3,AT1G02080.1	3UTR,3UTR,3UTR	0.0913,0.128,0.128	8.2344902,2.3440901,0.7845952
1_399851	+	A	0.612865	yes	AT1G02120	VAD1	AT1G02120.1,AT1G02120.2,AT1G02120.3	3UTR,3UTR,3UTR	0.4643,0.7099,0.7099	29.6298626,1.1413534,1.1040455
1_458029	+	C	0.859628	yes	AT1G02305	AT1G02305	AT1G02305.1	3UTR	0.2857	90.0013324
1_458030	+	C	0.859628	no	AT1G02305	AT1G02305	AT1G02305.1	3UTR	0.291	90.0013324
1_458037	+	A	0.18726	no	AT1G02305	AT1G02305	AT1G02305.1	3UTR	0.328	90.0013324
1_458038	+	T	4.75241	yes	AT1G02305	AT1G02305	AT1G02305.1	3UTR	0.3333	90.0013324
1_458093	+	T	0.491342	yes	AT1G02305	AT1G02305	AT1G02305.1	3UTR	0.6243	90.0013324
1_520221	+	T	2.20976	yes	AT1G02500	SAM1	AT1G02500.1,AT1G02500.2	3UTR,3UTR	0.0072,0.0092	347.6712191,126.4382399
1_520302	+	G	0.0152032	yes	AT1G02500	SAM1	AT1G02500.1,AT1G02500.2	3UTR,3UTR	0.3007,0.3807	347.6712191,126.4382399
1_520303	+	T	0.0152032	no	AT1G02500	SAM1	AT1G02500.1,AT1G02500.2	3UTR,3UTR	0.3043,0.3853	347.6712191,126.4382399
1_520310	+	A	1.98242	yes	AT1G02500	SAM1	AT1G02500.1,AT1G02500.2	3UTR,3UTR	0.3297,0.4174	347.6712191,126.4382399
1_520312	+	C	3.73121	yes	AT1G02500	SAM1	AT1G02500.1,AT1G02500.2	3UTR,3UTR	0.337,0.4266	347.6712191,126.4382399
1_520316	+	G	1.95085	yes	AT1G02500	SAM1	AT1G02500.1,AT1G02500.2	3UTR,3UTR	0.3514,0.445	347.6712191,126.4382399
1_520317	+	T	1.08921	no	AT1G02500	SAM1	AT1G02500.1,AT1G02500.2	3UTR,3UTR	0.3551,0.4495	347.6712191,126.4382399
1_539888	+	T	2.64067	yes	AT1G02560	CLPP5	AT1G02560.1	3UTR	0.2555	167.1861834
1_539920	+	T	2.3579	yes	AT1G02560	CLPP5	AT1G02560.1	3UTR	0.3551	167.1861834
1_539930	+	T	0.993043	yes	AT1G02560	CLPP5	AT1G02560.1	3UTR	0.3863	167.1861834
1_539936	+	A	1.24421	no	AT1G02560	CLPP5	AT1G02560.1	3UTR	0.405	167.1861834
1_539937	+	T	1.3554	yes	AT1G02560	CLPP5	AT1G02560.1	3UTR	0.4081	167.1861834
1_758518	+	T	0.717202	yes	AT1G03150	AT1G03150	AT1G03150.1	3UTR	0.322	26.0853691
1_758529	+	T	0.112485	no	AT1G03150	AT1G03150	AT1G03150.1	3UTR	0.3686	26.0853691
1_758530	+	G	1.62487	yes	AT1G03150	AT1G03150	AT1G03150.1	3UTR	0.3729	26.0853691
1_899579	+	A	0.613021	yes	AT1G03600	PSB27-1	AT1G03600.1	3UTR	0.3909	243.9835804
1_899633	+	A	0.756735	yes	AT1G03600	PSB27-1	AT1G03600.1	3UTR	0.5439	243.9835804
1_909222	+	A	2.26883	yes	AT1G03630	PORC	AT1G03630.1,AT1G03630.2	CDS,CDS	0.8516,0.8516	61.1067223,21.439434
1_993048	+	T	1.47167	yes	AT1G03900	ATNAP4	AT1G03900.1	3UTR	0.7143	143.4596462
1_1056615	+	T	5.97015	yes	AT1G04080	PRP39	AT1G04080.1,AT1G04080.3,AT1G04080.2,AT1G04080.5,AT1G04080.4	3UTR,3UTR,3UTR,3UTR,3UTR	0.2388,0.2319,0.32,0.32,0.2991	33.6011342,2.0560781,1.1959138,0.0752766,0.0439954
1_1099813	+	C	0.532329	yes	AT1G04170	EIF2 GAMMA	AT1G04170.1,AT1G04170.2	3UTR,3UTR	0.5556,0.5556	97.4894415,0.1479933
1_1138408	+	C	0.198187	no	AT1G04250	IAA17	AT1G04250.1	3UTR	0.2081	74.9965901
1_1138409	+	T	3.84217	yes	AT1G04250	IAA17	AT1G04250.1	3UTR	0.2112	74.9965901
1_1138410	+	T	3.80325	no	AT1G04250	IAA17	AT1G04250.1	3UTR	0.2143	74.9965901
1_1138411	+	T	0.123089	no	AT1G04250	IAA17	AT1G04250.1	3UTR	0.2174	74.9965901
1_1138505	+	G	0.0549595	yes	AT1G04250	IAA17	AT1G04250.1	3UTR	0.5093	74.9965901
1_1138518	+	A	0.0723088	yes	AT1G04250	IAA17	AT1G04250.1	3UTR	0.5497	74.9965901
1_1138526	+	T	0.167912	yes	AT1G04250	IAA17	AT1G04250.1	3UTR	0.5745	74.9965901
1_1138547	+	A	0.158676	yes	AT1G04250	IAA17	AT1G04250.1	3UTR	0.6398	74.9965901
1_1138560	+	A	0.916691	no	AT1G04250	IAA17	AT1G04250.1	3UTR	0.6801	74.9965901
1_1138561	+	T	1.63522	yes	AT1G04250	IAA17	AT1G04250.1	3UTR	0.6832	74.9965901
1_1138563	+	T	0.758867	yes	AT1G04250	IAA17	AT1G04250.1	3UTR	0.6894	74.9965901
1_1193854	+	T	1.1981	yes	AT1G04420	AT1G04420	AT1G04420.1	3UTR	0.837	53.6594312
1_1193855	+	T	1.1981	no	AT1G04420	AT1G04420	AT1G04420.1	3UTR	0.8424	53.6594312
1_1201387	+	T	1.01165	yes	AT1G04430	AT1G04430	AT1G04430.1,AT1G04430.2,AT1G04430.3	3UTR,3UTR,3UTR	0.3069,0.4404,0.4404	59.6417389,6.5537327,0.3350352
1_1201402	+	T	0.716271	yes	AT1G04430	AT1G04430	AT1G04430.1,AT1G04430.2,AT1G04430.3	3UTR,3UTR,3UTR	0.361,0.5181,0.5181	59.6417389,6.5537327,0.3350352
1_1217279	+	G	1.95887	yes	AT1G04480	RPL23C	AT1G04480.1	3UTR	0.0986	726.3825103
1_1217280	+	T	0.298421	no	AT1G04480	RPL23C	AT1G04480.1	3UTR	0.1033	726.3825103
1_1217281	+	A	0.176033	no	AT1G04480	RPL23C	AT1G04480.1	3UTR	0.108	726.3825103
1_1217331	+	T	5.97695	no	AT1G04480	RPL23C	AT1G04480.1	3UTR	0.3427	726.3825103
1_1217332	+	T	1.62909	no	AT1G04480	RPL23C	AT1G04480.1	3UTR	0.3474	726.3825103
1_1217333	+	T	3.68504	no	AT1G04480	RPL23C	AT1G04480.1	3UTR	0.3521	726.3825103
1_1217334	+	T	8.05825	no	AT1G04480	RPL23C	AT1G04480.1	3UTR	0.3568	726.3825103
1_1217335	+	T	11.3286	no	AT1G04480	RPL23C	AT1G04480.1	3UTR	0.3615	726.3825103
1_1217336	+	A	3.46069	no	AT1G04480	RPL23C	AT1G04480.1	3UTR	0.3662	726.3825103
1_1217337	+	T	11.331	yes	AT1G04480	RPL23C	AT1G04480.1	3UTR	0.3709	726.3825103
1_1217338	+	T	6.77948	no	AT1G04480	RPL23C	AT1G04480.1	3UTR	0.3756	726.3825103
1_1217339	+	T	6.2329	no	AT1G04480	RPL23C	AT1G04480.1	3UTR	0.3803	726.3825103
1_1217340	+	T	0.435053	no	AT1G04480	RPL23C	AT1G04480.1	3UTR	0.385	726.3825103
1_1217343	+	G	5.80681	yes	AT1G04480	RPL23C	AT1G04480.1	3UTR	0.3991	726.3825103
1_1217346	+	A	0.964361	yes	AT1G04480	RPL23C	AT1G04480.1	3UTR	0.4131	726.3825103
1_1217362	+	T	4.0223	yes	AT1G04480	RPL23C	AT1G04480.1	3UTR	0.4883	726.3825103
1_1217363	+	C	1.459	no	AT1G04480	RPL23C	AT1G04480.1	3UTR	0.493	726.3825103
1_1217364	+	A	0.171127	no	AT1G04480	RPL23C	AT1G04480.1	3UTR	0.4977	726.3825103
1_1217368	+	G	0.878229	yes	AT1G04480	RPL23C	AT1G04480.1	3UTR	0.5164	726.3825103
1_1230678	+	C	0.556093	no	AT1G04510	PRP19A	AT1G04510.1,AT1G04510.2	3UTR,3UTR	0.2401,0.3632	44.6306774,0.405891
1_1230679	+	T	0.707582	yes	AT1G04510	PRP19A	AT1G04510.1,AT1G04510.2	3UTR,3UTR	0.2429,0.3675	44.6306774,0.405891
1_1230703	+	C	0.977948	yes	AT1G04510	PRP19A	AT1G04510.1,AT1G04510.2	3UTR,3UTR	0.3107,0.4701	44.6306774,0.405891
1_1400712	+	A	4.5566	yes	AT1G04940	TIC20-I	AT1G04940.1	3UTR	0.446	71.0617439
1_1400713	+	T	2.07192	no	AT1G04940	TIC20-I	AT1G04940.1	3UTR	0.4507	71.0617439
1_1950580	+	T	0.0575538	no	AT1G06390	ASK9	AT1G06390.1	3UTR	0.375	28.4225426
1_1950581	+	T	2.09673	no	AT1G06390	ASK9	AT1G06390.1	3UTR	0.3773	28.4225426
1_1950582	+	T	2.66928	yes	AT1G06390	ASK9	AT1G06390.1	3UTR	0.3796	28.4225426
1_1950647	+	G	2.65999	yes	AT1G06390	ASK9	AT1G06390.1,AT1G06390.2	3UTR,3UTR	0.5301,0.1744	28.4225426,8.4338685
1_1958602	+	T	0.60173	yes	AT1G06410	TPS7	AT1G06410.1,AT1G06410.3,AT1G06410.2	3UTR,3UTR,3UTR	0.5907,0.5472,0.7442	35.0976667,3.533673,0.94564
1_1958605	+	G	0.264172	yes	AT1G06410	TPS7	AT1G06410.1,AT1G06410.3,AT1G06410.2	3UTR,3UTR,3UTR	0.5963,0.5523,0.7492	35.0976667,3.533673,0.94564
1_1958650	+	T	4.93338	no	AT1G06410	TPS7	AT1G06410.1,AT1G06410.3,AT1G06410.2	3UTR,3UTR,3UTR	0.6796,0.6295,0.8239	35.0976667,3.533673,0.94564
1_1958651	+	T	5.32779	yes	AT1G06410	TPS7	AT1G06410.1,AT1G06410.3,AT1G06410.2	3UTR,3UTR,3UTR	0.6815,0.6312,0.8256	35.0976667,3.533673,0.94564
1_2049226	+	T	4.40746	yes	AT1G06680	PSBP1	AT1G06680.1,AT1G06680.2	3UTR,3UTR	0.1548,0.1789	1799.1275004,0.3214846
1_2049264	+	C	2.05333	no	AT1G06680	PSBP1	AT1G06680.1,AT1G06680.2	3UTR,3UTR	0.3056,0.3532	1799.1275004,0.3214846
1_2049265	+	T	4.31437	yes	AT1G06680	PSBP1	AT1G06680.1,AT1G06680.2	3UTR,3UTR	0.3095,0.3578	1799.1275004,0.3214846
1_2049272	+	A	0.082827	no	AT1G06680	PSBP1	AT1G06680.1,AT1G06680.2	3UTR,3UTR	0.3373,0.3899	1799.1275004,0.3214846
1_2049273	+	A	2.64253	no	AT1G06680	PSBP1	AT1G06680.1,AT1G06680.2	3UTR,3UTR	0.3413,0.3945	1799.1275004,0.3214846
1_2049274	+	C	11.1967	yes	AT1G06680	PSBP1	AT1G06680.1,AT1G06680.2	3UTR,3UTR	0.3452,0.3991	1799.1275004,0.3214846
1_2049275	+	T	1.92838	no	AT1G06680	PSBP1	AT1G06680.1,AT1G06680.2	3UTR,3UTR	0.3492,0.4037	1799.1275004,0.3214846
1_2049289	+	T	9.05049	yes	AT1G06680	PSBP1	AT1G06680.1,AT1G06680.2	3UTR,3UTR	0.4048,0.4679	1799.1275004,0.3214846
1_2049293	+	T	2.25906	no	AT1G06680	PSBP1	AT1G06680.1,AT1G06680.2	3UTR,3UTR	0.4206,0.4862	1799.1275004,0.3214846
1_2049294	+	T	7.27449	no	AT1G06680	PSBP1	AT1G06680.1,AT1G06680.2	3UTR,3UTR	0.4246,0.4908	1799.1275004,0.3214846
1_2049295	+	T	11.9789	yes	AT1G06680	PSBP1	AT1G06680.1,AT1G06680.2	3UTR,3UTR	0.4286,0.4954	1799.1275004,0.3214846
1_2049311	+	T	6.42667	yes	AT1G06680	PSBP1	AT1G06680.1,AT1G06680.2	3UTR,3UTR	0.4921,0.5688	1799.1275004,0.3214846
1_2049312	+	A	3.07681	no	AT1G06680	PSBP1	AT1G06680.1,AT1G06680.2	3UTR,3UTR	0.496,0.5734	1799.1275004,0.3214846
1_2049313	+	C	3.29591	no	AT1G06680	PSBP1	AT1G06680.1,AT1G06680.2	3UTR,3UTR	0.5,0.578	1799.1275004,0.3214846
1_2049314	+	C	1.64667	no	AT1G06680	PSBP1	AT1G06680.1,AT1G06680.2	3UTR,3UTR	0.504,0.5826	1799.1275004,0.3214846
1_2049315	+	T	5.93129	no	AT1G06680	PSBP1	AT1G06680.1,AT1G06680.2	3UTR,3UTR	0.5079,0.5872	1799.1275004,0.3214846
1_2049320	+	T	1.82595	no	AT1G06680	PSBP1	AT1G06680.1,AT1G06680.2	3UTR,3UTR	0.5278,0.6101	1799.1275004,0.3214846
1_2049321	+	A	2.23193	no	AT1G06680	PSBP1	AT1G06680.1,AT1G06680.2	3UTR,3UTR	0.5317,0.6147	1799.1275004,0.3214846
1_2049322	+	A	2.99663	yes	AT1G06680	PSBP1	AT1G06680.1,AT1G06680.2	3UTR,3UTR	0.5357,0.6193	1799.1275004,0.3214846
1_2049339	+	G	2.75339	yes	AT1G06680	PSBP1	AT1G06680.1,AT1G06680.2	3UTR,3UTR	0.6032,0.6972	1799.1275004,0.3214846
1_2155052	+	T	2.21171	yes	AT1G07010	AT1G07010	AT1G07010.1,AT1G07010.2,AT1G07010.3	3UTR,3UTR,3UTR	0.2767,0.2767,0.3086	17.3127712,0.1463168,0.0474154
1_2155113	+	G	0.924298	yes	AT1G07010	AT1G07010	AT1G07010.1,AT1G07010.2,AT1G07010.3	3UTR,3UTR,3UTR	0.48,0.48,0.5353	17.3127712,0.1463168,0.0474154
1_2171967	+	T	0.547104	yes	AT1G07080	AT1G07080	AT1G07080.1	3UTR	0.3163	86.5417592
1_2171984	+	G	0.393872	yes	AT1G07080	AT1G07080	AT1G07080.1	3UTR	0.3675	86.5417592
1_2171995	+	A	2.10153	yes	AT1G07080	AT1G07080	AT1G07080.1	3UTR	0.4006	86.5417592
1_2250312	+	A	2.07342	yes	AT1G07320	RPL4	AT1G07320.1,AT1G07320.2,AT1G07320.4	3UTR,3UTR,3UTR	0.3599,0.362,0.4353	325.4883054,18.5438913,0.0224357
1_2250338	+	T	5.60367	yes	AT1G07320	RPL4	AT1G07320.1,AT1G07320.2,AT1G07320.4	3UTR,3UTR,3UTR	0.4366,0.4392,0.5174	325.4883054,18.5438913,0.0224357
1_2250377	+	T	7.15138	yes	AT1G07320	RPL4	AT1G07320.1,AT1G07320.2,AT1G07320.4	3UTR,3UTR,3UTR	0.5516,0.5549,0.6404	325.4883054,18.5438913,0.0224357
1_2250378	+	G	1.82382	no	AT1G07320	RPL4	AT1G07320.1,AT1G07320.2,AT1G07320.4	3UTR,3UTR,3UTR	0.5546,0.5579,0.6435	325.4883054,18.5438913,0.0224357
1_2381170	+	A	0.337043	yes	AT1G07700	AT1G07700	AT1G07700.1,AT1G07700.2,AT1G07700.4,AT1G07700.3	3UTR,3UTR,3UTR,3UTR	0.1603,0.1603,0.1673,0.1795	24.8142986,16.9257848,0.4975003,0.0875061
1_2381188	+	A	0.279408	yes	AT1G07700	AT1G07700	AT1G07700.1,AT1G07700.2,AT1G07700.4,AT1G07700.3	3UTR,3UTR,3UTR,3UTR	0.229,0.229,0.239,0.2564	24.8142986,16.9257848,0.4975003,0.0875061
1_2381196	+	T	0.400433	yes	AT1G07700	AT1G07700	AT1G07700.1,AT1G07700.2,AT1G07700.4,AT1G07700.3	3UTR,3UTR,3UTR,3UTR	0.2595,0.2595,0.2709,0.2906	24.8142986,16.9257848,0.4975003,0.0875061
1_2381197	+	G	0.341935	no	AT1G07700	AT1G07700	AT1G07700.1,AT1G07700.2,AT1G07700.4,AT1G07700.3	3UTR,3UTR,3UTR,3UTR	0.2634,0.2634,0.2749,0.2949	24.8142986,16.9257848,0.4975003,0.0875061
1_2381320	+	A	0.420714	yes	AT1G07700	AT1G07700	AT1G07700.1,AT1G07700.2,AT1G07700.4,AT1G07700.3	3UTR,3UTR,3UTR,3UTR	0.7328,0.7328,0.7649,0.8205	24.8142986,16.9257848,0.4975003,0.0875061
1_2439443	+	G	0.493587	yes	AT1G07890	APX1	AT1G07890.1,AT1G07890.3,AT1G07890.2,AT1G07890.8,AT1G07890.6,AT1G07890.4,AT1G07890.7,AT1G07890.5	3UTR,3UTR,3UTR,3UTR,3UTR,3UTR,3UTR,3UTR	0.0306,0.0306,0.0306,0.0306,0.2952,0.0306,0.0306,0.0306	747.1104397,383.0246865,10.7777044,4.6038456,4.5600895,3.9813015,1.8562729,0.7663604
1_2439459	+	T	1.47063	yes	AT1G07890	APX1	AT1G07890.1,AT1G07890.3,AT1G07890.2,AT1G07890.8,AT1G07890.6,AT1G07890.4,AT1G07890.7,AT1G07890.5	3UTR,3UTR,3UTR,3UTR,3UTR,3UTR,3UTR,3UTR	0.1004,0.1004,0.1004,0.1004,0.346,0.1004,0.1004,0.1004	747.1104397,383.0246865,10.7777044,4.6038456,4.5600895,3.9813015,1.8562729,0.7663604
1_2439562	+	T	3.87737	yes	AT1G07890	APX1	AT1G07890.1,AT1G07890.3,AT1G07890.2,AT1G07890.8,AT1G07890.6,AT1G07890.4,AT1G07890.7,AT1G07890.5	3UTR,3UTR,3UTR,3UTR,3UTR,3UTR,3UTR,3UTR	0.5502,0.5502,0.5502,0.5502,0.673,0.5502,0.5502,0.5502	747.1104397,383.0246865,10.7777044,4.6038456,4.5600895,3.9813015,1.8562729,0.7663604
1_2439571	+	G	1.60453	no	AT1G07890	APX1	AT1G07890.1,AT1G07890.3,AT1G07890.2,AT1G07890.8,AT1G07890.6,AT1G07890.4,AT1G07890.7,AT1G07890.5	3UTR,3UTR,3UTR,3UTR,3UTR,3UTR,3UTR,3UTR	0.5895,0.5895,0.5895,0.5895,0.7016,0.5895,0.5895,0.5895	747.1104397,383.0246865,10.7777044,4.6038456,4.5600895,3.9813015,1.8562729,0.7663604
1_2439572	+	T	2.15867	no	AT1G07890	APX1	AT1G07890.1,AT1G07890.3,AT1G07890.2,AT1G07890.8,AT1G07890.6,AT1G07890.4,AT1G07890.7,AT1G07890.5	3UTR,3UTR,3UTR,3UTR,3UTR,3UTR,3UTR,3UTR	0.5939,0.5939,0.5939,0.5939,0.7048,0.5939,0.5939,0.5939	747.1104397,383.0246865,10.7777044,4.6038456,4.5600895,3.9813015,1.8562729,0.7663604
1_2439573	+	T	4.74925	yes	AT1G07890	APX1	AT1G07890.1,AT1G07890.3,AT1G07890.2,AT1G07890.8,AT1G07890.6,AT1G07890.4,AT1G07890.7,AT1G07890.5	3UTR,3UTR,3UTR,3UTR,3UTR,3UTR,3UTR,3UTR	0.5983,0.5983,0.5983,0.5983,0.7079,0.5983,0.5983,0.5983	747.1104397,383.0246865,10.7777044,4.6038456,4.5600895,3.9813015,1.8562729,0.7663604
1_2439574	+	T	2.61598	no	AT1G07890	APX1	AT1G07890.1,AT1G07890.3,AT1G07890.2,AT1G07890.8,AT1G07890.6,AT1G07890.4,AT1G07890.7,AT1G07890.5	3UTR,3UTR,3UTR,3UTR,3UTR,3UTR,3UTR,3UTR	0.6026,0.6026,0.6026,0.6026,0.7111,0.6026,0.6026,0.6026	747.1104397,383.0246865,10.7777044,4.6038456,4.5600895,3.9813015,1.8562729,0.7663604
1_2439575	+	T	2.45298	no	AT1G07890	APX1	AT1G07890.1,AT1G07890.3,AT1G07890.2,AT1G07890.8,AT1G07890.6,AT1G07890.4,AT1G07890.7,AT1G07890.5	3UTR,3UTR,3UTR,3UTR,3UTR,3UTR,3UTR,3UTR	0.607,0.607,0.607,0.607,0.7143,0.607,0.607,0.607	747.1104397,383.0246865,10.7777044,4.6038456,4.5600895,3.9813015,1.8562729,0.7663604
1_2439576	+	T	3.05898	no	AT1G07890	APX1	AT1G07890.1,AT1G07890.3,AT1G07890.2,AT1G07890.8,AT1G07890.6,AT1G07890.4,AT1G07890.7,AT1G07890.5	3UTR,3UTR,3UTR,3UTR,3UTR,3UTR,3UTR,3UTR	0.6114,0.6114,0.6114,0.6114,0.7175,0.6114,0.6114,0.6114	747.1104397,383.0246865,10.7777044,4.6038456,4.5600895,3.9813015,1.8562729,0.7663604
1_2439594	+	T	1.59822	no	AT1G07890	APX1	AT1G07890.1,AT1G07890.3,AT1G07890.2,AT1G07890.8,AT1G07890.6,AT1G07890.4,AT1G07890.7,AT1G07890.5	3UTR,3UTR,3UTR,3UTR,3UTR,3UTR,3UTR,3UTR	0.69,0.69,0.69,0.69,0.7746,0.69,0.69,0.69	747.1104397,383.0246865,10.7777044,4.6038456,4.5600895,3.9813015,1.8562729,0.7663604
1_2439595	+	G	2.46368	yes	AT1G07890	APX1	AT1G07890.1,AT1G07890.3,AT1G07890.2,AT1G07890.8,AT1G07890.6,AT1G07890.4,AT1G07890.7,AT1G07890.5	3UTR,3UTR,3UTR,3UTR,3UTR,3UTR,3UTR,3UTR	0.6943,0.6943,0.6943,0.6943,0.7778,0.6943,0.6943,0.6943	747.1104397,383.0246865,10.7777044,4.6038456,4.5600895,3.9813015,1.8562729,0.7663604
1_2439598	+	C	0.635431	yes	AT1G07890	APX1	AT1G07890.1,AT1G07890.3,AT1G07890.2,AT1G07890.8,AT1G07890.6,AT1G07890.4,AT1G07890.7,AT1G07890.5	3UTR,3UTR,3UTR,3UTR,3UTR,3UTR,3UTR,3UTR	0.7074,0.7074,0.7074,0.7074,0.7873,0.7074,0.7074,0.7074	747.1104397,383.0246865,10.7777044,4.6038456,4.5600895,3.9813015,1.8562729,0.7663604
1_2439610	+	G	0.739183	no	AT1G07890	APX1	AT1G07890.1,AT1G07890.3,AT1G07890.2,AT1G07890.8,AT1G07890.6,AT1G07890.4,AT1G07890.7,AT1G07890.5	3UTR,3UTR,3UTR,3UTR,3UTR,3UTR,3UTR,3UTR	0.7598,0.7598,0.7598,0.7598,0.8254,0.7598,0.7598,0.7598	747.1104397,383.0246865,10.7777044,4.6038456,4.5600895,3.9813015,1.8562729,0.7663604
1_2439611	+	C	0.655935	no	AT1G07890	APX1	AT1G07890.1,AT1G07890.3,AT1G07890.2,AT1G07890.8,AT1G07890.6,AT1G07890.4,AT1G07890.7,AT1G07890.5	3UTR,3UTR,3UTR,3UTR,3UTR,3UTR,3UTR,3UTR	0.7642,0.7642,0.7642,0.7642,0.8286,0.7642,0.7642,0.7642	747.1104397,383.0246865,10.7777044,4.6038456,4.5600895,3.9813015,1.8562729,0.7663604
1_2439612	+	T	9.35361	yes	AT1G07890	APX1	AT1G07890.1,AT1G07890.3,AT1G07890.2,AT1G07890.8,AT1G07890.6,AT1G07890.4,AT1G07890.7,AT1G07890.5	3UTR,3UTR,3UTR,3UTR,3UTR,3UTR,3UTR,3UTR	0.7686,0.7686,0.7686,0.7686,0.8317,0.7686,0.7686,0.7686	747.1104397,383.0246865,10.7777044,4.6038456,4.5600895,3.9813015,1.8562729,0.7663604
1_2439613	+	T	3.55228	no	AT1G07890	APX1	AT1G07890.1,AT1G07890.3,AT1G07890.2,AT1G07890.8,AT1G07890.6,AT1G07890.4,AT1G07890.7,AT1G07890.5	3UTR,3UTR,3UTR,3UTR,3UTR,3UTR,3UTR,3UTR	0.7729,0.7729,0.7729,0.7729,0.8349,0.7729,0.7729,0.7729	747.1104397,383.0246865,10.7777044,4.6038456,4.5600895,3.9813015,1.8562729,0.7663604
1_2439614	+	T	7.11598	no	AT1G07890	APX1	AT1G07890.1,AT1G07890.3,AT1G07890.2,AT1G07890.8,AT1G07890.6,AT1G07890.4,AT1G07890.7,AT1G07890.5	3UTR,3UTR,3UTR,3UTR,3UTR,3UTR,3UTR,3UTR	0.7773,0.7773,0.7773,0.7773,0.8381,0.7773,0.7773,0.7773	747.1104397,383.0246865,10.7777044,4.6038456,4.5600895,3.9813015,1.8562729,0.7663604
1_2439615	+	T	2.40062	no	AT1G07890	APX1	AT1G07890.1,AT1G07890.3,AT1G07890.2,AT1G07890.8,AT1G07890.6,AT1G07890.4,AT1G07890.7,AT1G07890.5	3UTR,3UTR,3UTR,3UTR,3UTR,3UTR,3UTR,3UTR	0.7817,0.7817,0.7817,0.7817,0.8413,0.7817,0.7817,0.7817	747.1104397,383.0246865,10.7777044,4.6038456,4.5600895,3.9813015,1.8562729,0.7663604
1_2439620	+	C	1.8312	yes	AT1G07890	APX1	AT1G07890.1,AT1G07890.3,AT1G07890.2,AT1G07890.8,AT1G07890.6,AT1G07890.4,AT1G07890.7,AT1G07890.5	3UTR,3UTR,3UTR,3UTR,3UTR,3UTR,3UTR,3UTR	0.8035,0.8035,0.8035,0.8035,0.8571,0.8035,0.8035,0.8035	747.1104397,383.0246865,10.7777044,4.6038456,4.5600895,3.9813015,1.8562729,0.7663604
1_2439621	+	T	0.442972	no	AT1G07890	APX1	AT1G07890.1,AT1G07890.3,AT1G07890.2,AT1G07890.8,AT1G07890.6,AT1G07890.4,AT1G07890.7,AT1G07890.5	3UTR,3UTR,3UTR,3UTR,3UTR,3UTR,3UTR,3UTR	0.8079,0.8079,0.8079,0.8079,0.8603,0.8079,0.8079,0.8079	747.1104397,383.0246865,10.7777044,4.6038456,4.5600895,3.9813015,1.8562729,0.7663604
1_2439622	+	T	0.664215	no	AT1G07890	APX1	AT1G07890.1,AT1G07890.3,AT1G07890.2,AT1G07890.8,AT1G07890.6,AT1G07890.4,AT1G07890.7,AT1G07890.5	3UTR,3UTR,3UTR,3UTR,3UTR,3UTR,3UTR,3UTR	0.8122,0.8122,0.8122,0.8122,0.8635,0.8122,0.8122,0.8122	747.1104397,383.0246865,10.7777044,4.6038456,4.5600895,3.9813015,1.8562729,0.7663604
1_2457071	+	A	8.5146	yes	AT1G07920	A3	AT1G07920.1	3UTR	0.2163	728.0196941
1_2457202	+	T	8.24968	yes	AT1G07920	A3	AT1G07920.1	3UTR	0.627	728.0196941
1_2457203	+	C	2.50796	no	AT1G07920	A3	AT1G07920.1	3UTR	0.6301	728.0196941
1_2457205	+	T	2.82869	yes	AT1G07920	A3	AT1G07920.1	3UTR	0.6364	728.0196941
1_2457215	+	T	2.16585	no	AT1G07920	A3	AT1G07920.1	3UTR	0.6677	728.0196941
1_2457216	+	T	2.72518	yes	AT1G07920	A3	AT1G07920.1	3UTR	0.6708	728.0196941
1_2457217	+	T	0.67559	no	AT1G07920	A3	AT1G07920.1	3UTR	0.674	728.0196941
1_2457224	+	T	4.87342	yes	AT1G07920	A3	AT1G07920.1	3UTR	0.6959	728.0196941
1_2457225	+	T	1.62585	no	AT1G07920	A3	AT1G07920.1	3UTR	0.6991	728.0196941
1_2457227	+	T	1.54914	no	AT1G07920	A3	AT1G07920.1	3UTR	0.7053	728.0196941
1_2457228	+	G	3.58533	yes	AT1G07920	A3	AT1G07920.1	3UTR	0.7085	728.0196941
1_2457229	+	T	0.29592	no	AT1G07920	A3	AT1G07920.1	3UTR	0.7116	728.0196941
1_2457235	+	G	0.966467	no	AT1G07920	A3	AT1G07920.1	3UTR	0.7304	728.0196941
1_2457236	+	A	4.44874	yes	AT1G07920	A3	AT1G07920.1	3UTR	0.7335	728.0196941
1_2460533	+	G	1.47405	yes	AT1G07930	A3	AT1G07930.1,AT1G07930.2	3UTR,3UTR	0.2067,0.2236	600.9220645,0.3761779
1_2460641	+	T	10.1208	yes	AT1G07930	A3	AT1G07930.1,AT1G07930.2	3UTR,3UTR	0.5084,0.5498	600.9220645,0.3761779
1_2460642	+	A	3.42836	no	AT1G07930	A3	AT1G07930.1,AT1G07930.2	3UTR,3UTR	0.5112,0.5529	600.9220645,0.3761779
1_2460643	+	T	4.18678	no	AT1G07930	A3	AT1G07930.1,AT1G07930.2	3UTR,3UTR	0.514,0.5559	600.9220645,0.3761779
1_2460644	+	C	0.219862	no	AT1G07930	A3	AT1G07930.1,AT1G07930.2	3UTR,3UTR	0.5168,0.5589	600.9220645,0.3761779
1_2460645	+	A	5.63424	no	AT1G07930	A3	AT1G07930.1,AT1G07930.2	3UTR,3UTR	0.5196,0.5619	600.9220645,0.3761779
1_2460646	+	A	0.23696	no	AT1G07930	A3	AT1G07930.1,AT1G07930.2	3UTR,3UTR	0.5223,0.565	600.9220645,0.3761779
1_2460647	+	T	5.00834	no	AT1G07930	A3	AT1G07930.1,AT1G07930.2	3UTR,3UTR	0.5251,0.568	600.9220645,0.3761779
1_2460648	+	T	1.90878	no	AT1G07930	A3	AT1G07930.1,AT1G07930.2	3UTR,3UTR	0.5279,0.571	600.9220645,0.3761779
1_2460649	+	T	6.5576	no	AT1G07930	A3	AT1G07930.1,AT1G07930.2	3UTR,3UTR	0.5307,0.574	600.9220645,0.3761779
1_2460655	+	C	1.96433	no	AT1G07930	A3	AT1G07930.1,AT1G07930.2	3UTR,3UTR	0.5475,0.5921	600.9220645,0.3761779
1_2460656	+	T	2.82466	yes	AT1G07930	A3	AT1G07930.1,AT1G07930.2	3UTR,3UTR	0.5503,0.5952	600.9220645,0.3761779
1_2460658	+	T	2.48072	yes	AT1G07930	A3	AT1G07930.1,AT1G07930.2	3UTR,3UTR	0.5559,0.6012	600.9220645,0.3761779
1_2460666	+	T	3.1324	yes	AT1G07930	A3	AT1G07930.1,AT1G07930.2	3UTR,3UTR	0.5782,0.6254	600.9220645,0.3761779
1_2460667	+	T	2.0175	no	AT1G07930	A3	AT1G07930.1,AT1G07930.2	3UTR,3UTR	0.581,0.6284	600.9220645,0.3761779
1_2460674	+	T	1.34262	yes	AT1G07930	A3	AT1G07930.1,AT1G07930.2	3UTR,3UTR	0.6006,0.6495	600.9220645,0.3761779
1_2460675	+	A	1.31624	no	AT1G07930	A3	AT1G07930.1,AT1G07930.2	3UTR,3UTR	0.6034,0.6526	600.9220645,0.3761779
1_2537769	+	A	6.20586	yes	AT1G08110	AT1G08110	AT1G08110.3,AT1G08110.1,AT1G08110.4,AT1G08110.2	3UTR,3UTR,3UTR,3UTR	0.46,0.4615,0.4585,0.4615	59.4996626,26.4963936,22.4687494,0.6983862
1_2537779	+	T	0.691456	no	AT1G08110	AT1G08110	AT1G08110.3,AT1G08110.1,AT1G08110.4,AT1G08110.2	3UTR,3UTR,3UTR,3UTR	0.4933,0.495,0.4917,0.495	59.4996626,26.4963936,22.4687494,0.6983862
1_2537780	+	T	3.22265	yes	AT1G08110	AT1G08110	AT1G08110.3,AT1G08110.1,AT1G08110.4,AT1G08110.2	3UTR,3UTR,3UTR,3UTR	0.4967,0.4983,0.495,0.4983	59.4996626,26.4963936,22.4687494,0.6983862
1_2537781	+	T	0.765879	no	AT1G08110	AT1G08110	AT1G08110.3,AT1G08110.1,AT1G08110.4,AT1G08110.2	3UTR,3UTR,3UTR,3UTR	0.5,0.5017,0.4983,0.5017	59.4996626,26.4963936,22.4687494,0.6983862
1_2537786	+	G	2.6876	yes	AT1G08110	AT1G08110	AT1G08110.3,AT1G08110.1,AT1G08110.4,AT1G08110.2	3UTR,3UTR,3UTR,3UTR	0.5167,0.5184,0.515,0.5184	59.4996626,26.4963936,22.4687494,0.6983862
1_2537821	+	T	0.728105	no	AT1G08110	AT1G08110	AT1G08110.3,AT1G08110.1,AT1G08110.4,AT1G08110.2	3UTR,3UTR,3UTR,3UTR	0.6333,0.6355,0.6312,0.6355	59.4996626,26.4963936,22.4687494,0.6983862
1_2537822	+	T	8.72636	yes	AT1G08110	AT1G08110	AT1G08110.3,AT1G08110.1,AT1G08110.4,AT1G08110.2	3UTR,3UTR,3UTR,3UTR	0.6367,0.6388,0.6346,0.6388	59.4996626,26.4963936,22.4687494,0.6983862
1_2537825	+	C	18.1823	yes	AT1G08110	AT1G08110	AT1G08110.3,AT1G08110.1,AT1G08110.4,AT1G08110.2	3UTR,3UTR,3UTR,3UTR	0.6467,0.6488,0.6445,0.6488	59.4996626,26.4963936,22.4687494,0.6983862
1_2537902	+	T	0.422523	yes	AT1G08110	AT1G08110	AT1G08110.3,AT1G08110.1,AT1G08110.4,AT1G08110.2	3UTR,3UTR,3UTR,3UTR	0.9033,0.9064,0.9003,0.9064	59.4996626,26.4963936,22.4687494,0.6983862
1_2637766	+	T	1.98571	no	AT1G08360	RPL10AA	AT1G08360.1	3UTR	0.2298	428.8355285
1_2637767	+	G	7.12411	yes	AT1G08360	RPL10AA	AT1G08360.1	3UTR	0.233	428.8355285
1_2637768	+	T	6.95017	no	AT1G08360	RPL10AA	AT1G08360.1	3UTR	0.2362	428.8355285
1_2637771	+	A	0.638999	no	AT1G08360	RPL10AA	AT1G08360.1	3UTR	0.246	428.8355285
1_2637772	+	A	0.654333	yes	AT1G08360	RPL10AA	AT1G08360.1	3UTR	0.2492	428.8355285
1_2637777	+	G	4.17848	yes	AT1G08360	RPL10AA	AT1G08360.1	3UTR	0.2654	428.8355285
1_2637778	+	T	1.8253	no	AT1G08360	RPL10AA	AT1G08360.1	3UTR	0.2686	428.8355285
1_2637804	+	T	10.6563	yes	AT1G08360	RPL10AA	AT1G08360.1	3UTR	0.3528	428.8355285
1_2637805	+	T	8.7445	no	AT1G08360	RPL10AA	AT1G08360.1	3UTR	0.356	428.8355285
1_2637809	+	T	0.348751	no	AT1G08360	RPL10AA	AT1G08360.1	3UTR	0.3689	428.8355285
1_2637810	+	T	3.20884	yes	AT1G08360	RPL10AA	AT1G08360.1	3UTR	0.3722	428.8355285
1_2637825	+	T	4.35108	yes	AT1G08360	RPL10AA	AT1G08360.1	3UTR	0.4207	428.8355285
1_2637848	+	G	2.50984	yes	AT1G08360	RPL10AA	AT1G08360.1	3UTR	0.4951	428.8355285
1_2637849	+	T	0.828287	no	AT1G08360	RPL10AA	AT1G08360.1	3UTR	0.4984	428.8355285
1_2685476	+	C	0.124206	yes	AT1G08480	SDH6	AT1G08480.1	3UTR	0.2614	156.7734106
1_2685527	+	G	3.2295	yes	AT1G08480	SDH6	AT1G08480.1	3UTR	0.4281	156.7734106
1_2685543	+	T	8.7829	yes	AT1G08480	SDH6	AT1G08480.1	3UTR	0.4804	156.7734106
1_2700820	+	C	3.93945	yes	AT1G08520	CHLD	AT1G08520.1	3UTR	0	83.7647587
1_2700865	+	C	2.34502	yes	AT1G08520	CHLD	AT1G08520.1	3UTR	0.2228	83.7647587
1_2829187	+	T	1.30109	yes	AT1G08830	CSD1	AT1G08830.1,AT1G08830.2	3UTR,3UTR	0.5096,0.5096	157.316461,0.0793688
1_2829224	+	T	0.150695	no	AT1G08830	CSD1	AT1G08830.1,AT1G08830.2	3UTR,3UTR	0.6513,0.6513	157.316461,0.0793688
1_2829225	+	T	1.67051	yes	AT1G08830	CSD1	AT1G08830.1,AT1G08830.2	3UTR,3UTR	0.6552,0.6552	157.316461,0.0793688
1_2949037	+	T	0.724039	no	AT1G09150	AT1G09150	AT1G09150.1	3UTR	0.512	42.7824425
1_2949038	+	T	1.29179	no	AT1G09150	AT1G09150	AT1G09150.1	3UTR	0.516	42.7824425
1_2949039	+	A	6.21475	no	AT1G09150	AT1G09150	AT1G09150.1	3UTR	0.52	42.7824425
1_2949040	+	T	7.70857	yes	AT1G09150	AT1G09150	AT1G09150.1	3UTR	0.524	42.7824425
1_2949041	+	T	4.5697	no	AT1G09150	AT1G09150	AT1G09150.1	3UTR	0.528	42.7824425
1_2949042	+	T	7.33802	no	AT1G09150	AT1G09150	AT1G09150.1	3UTR	0.532	42.7824425
1_2949043	+	T	3.70625	no	AT1G09150	AT1G09150	AT1G09150.1	3UTR	0.536	42.7824425
1_2949076	+	G	2.72349	no	AT1G09150	AT1G09150	AT1G09150.1	3UTR	0.668	42.7824425
1_2949077	+	T	2.82216	yes	AT1G09150	AT1G09150	AT1G09150.1	3UTR	0.672	42.7824425
1_3018108	+	T	2.61425	yes	AT1G09340	CSP41B	AT1G09340.1,AT1G09340.2	3UTR,3UTR	0.1423,0.2384	341.2415075,1.2466962
1_3018116	+	T	6.76088	no	AT1G09340	CSP41B	AT1G09340.1,AT1G09340.2	3UTR,3UTR	0.1581,0.2649	341.2415075,1.2466962
1_3018117	+	C	6.32315	no	AT1G09340	CSP41B	AT1G09340.1,AT1G09340.2	3UTR,3UTR	0.1601,0.2682	341.2415075,1.2466962
1_3018118	+	T	6.3583	no	AT1G09340	CSP41B	AT1G09340.1,AT1G09340.2	3UTR,3UTR	0.1621,0.2715	341.2415075,1.2466962
1_3018119	+	C	8.19924	yes	AT1G09340	CSP41B	AT1G09340.1,AT1G09340.2	3UTR,3UTR	0.164,0.2748	341.2415075,1.2466962
1_3018120	+	A	1.60594	no	AT1G09340	CSP41B	AT1G09340.1,AT1G09340.2	3UTR,3UTR	0.166,0.2781	341.2415075,1.2466962
1_3018122	+	G	2.46973	yes	AT1G09340	CSP41B	AT1G09340.1,AT1G09340.2	3UTR,3UTR	0.17,0.2848	341.2415075,1.2466962
1_3018126	+	G	2.53696	yes	AT1G09340	CSP41B	AT1G09340.1,AT1G09340.2	3UTR,3UTR	0.1779,0.298	341.2415075,1.2466962
1_3018127	+	T	1.46173	no	AT1G09340	CSP41B	AT1G09340.1,AT1G09340.2	3UTR,3UTR	0.1798,0.3013	341.2415075,1.2466962
1_3018139	+	T	4.96972	no	AT1G09340	CSP41B	AT1G09340.1,AT1G09340.2	3UTR,3UTR	0.2036,0.3411	341.2415075,1.2466962
1_3018140	+	T	5.12237	yes	AT1G09340	CSP41B	AT1G09340.1,AT1G09340.2	3UTR,3UTR	0.2055,0.3444	341.2415075,1.2466962
1_3018154	+	C	3.26446	yes	AT1G09340	CSP41B	AT1G09340.1,AT1G09340.2	3UTR,3UTR	0.2332,0.3907	341.2415075,1.2466962
1_3018155	+	T	3.13654	no	AT1G09340	CSP41B	AT1G09340.1,AT1G09340.2	3UTR,3UTR	0.2352,0.394	341.2415075,1.2466962
1_3045112	+	A	0.468407	yes	AT1G09430	ACLA-3	AT1G09430.1	3UTR	0.2367	66.1458857
1_3045138	+	T	3.03738	yes	AT1G09430	ACLA-3	AT1G09430.1	3UTR	0.2829	66.1458857
1_3045151	+	C	1.70773	yes	AT1G09430	ACLA-3	AT1G09430.1	3UTR	0.306	66.1458857
1_3045189	+	T	0.813235	no	AT1G09430	ACLA-3	AT1G09430.1	3UTR	0.3737	66.1458857
1_3045190	+	C	2.2092	no	AT1G09430	ACLA-3	AT1G09430.1	3UTR	0.3754	66.1458857
1_3045191	+	C	0.75277	no	AT1G09430	ACLA-3	AT1G09430.1	3UTR	0.3772	66.1458857
1_3045192	+	T	0.524378	no	AT1G09430	ACLA-3	AT1G09430.1	3UTR	0.379	66.1458857
1_3045193	+	T	0.943628	no	AT1G09430	ACLA-3	AT1G09430.1	3UTR	0.3808	66.1458857
1_3045194	+	A	5.61937	no	AT1G09430	ACLA-3	AT1G09430.1	3UTR	0.3826	66.1458857
1_3045195	+	T	5.8536	no	AT1G09430	ACLA-3	AT1G09430.1	3UTR	0.3843	66.1458857
1_3045196	+	T	7.29769	no	AT1G09430	ACLA-3	AT1G09430.1	3UTR	0.3861	66.1458857
1_3045197	+	T	4.25263	no	AT1G09430	ACLA-3	AT1G09430.1	3UTR	0.3879	66.1458857
1_3045198	+	T	7.31126	yes	AT1G09430	ACLA-3	AT1G09430.1	3UTR	0.3897	66.1458857
1_3045199	+	G	1.27072	no	AT1G09430	ACLA-3	AT1G09430.1	3UTR	0.3915	66.1458857
1_3107636	+	T	5.13542	no	AT1G09590	RPL21A	AT1G09590.1	3UTR	0.1495	819.9980541
1_3107637	+	C	4.87211	no	AT1G09590	RPL21A	AT1G09590.1	3UTR	0.1546	819.9980541
1_3107638	+	A	13.1978	no	AT1G09590	RPL21A	AT1G09590.1	3UTR	0.1598	819.9980541
1_3107639	+	T	8.05732	no	AT1G09590	RPL21A	AT1G09590.1	3UTR	0.1649	819.9980541
1_3107640	+	T	0.958812	no	AT1G09590	RPL21A	AT1G09590.1	3UTR	0.1701	819.9980541
1_3107641	+	T	1.60652	no	AT1G09590	RPL21A	AT1G09590.1	3UTR	0.1753	819.9980541
1_3107642	+	G	3.50804	no	AT1G09590	RPL21A	AT1G09590.1	3UTR	0.1804	819.9980541
1_3107643	+	T	21.2498	yes	AT1G09590	RPL21A	AT1G09590.1	3UTR	0.1856	819.9980541
1_3107644	+	T	15.2627	no	AT1G09590	RPL21A	AT1G09590.1	3UTR	0.1907	819.9980541
1_3107647	+	G	5.44974	yes	AT1G09590	RPL21A	AT1G09590.1	3UTR	0.2062	819.9980541
1_3107722	+	T	1.76261	no	AT1G09590	RPL21A	AT1G09590.1	3UTR	0.5928	819.9980541
1_3107723	+	A	2.31346	no	AT1G09590	RPL21A	AT1G09590.1	3UTR	0.5979	819.9980541
1_3107724	+	T	3.32906	yes	AT1G09590	RPL21A	AT1G09590.1	3UTR	0.6031	819.9980541
1_3107725	+	T	2.02959	no	AT1G09590	RPL21A	AT1G09590.1	3UTR	0.6082	819.9980541
1_3107730	+	T	4.37396	yes	AT1G09590	RPL21A	AT1G09590.1	3UTR	0.634	819.9980541
1_3122189	+	T	1.87028	yes	AT1G09640	AT1G09640	AT1G09640.1,AT1G09640.2	3UTR,3UTR	0.0925,0.2105	200.9245989,0.0544001
1_3122305	+	T	7.84807	yes	AT1G09640	AT1G09640	AT1G09640.1,AT1G09640.2	3UTR,3UTR	0.3907,0.8889	200.9245989,0.0544001
1_3122310	+	T	1.11293	yes	AT1G09640	AT1G09640	AT1G09640.1,AT1G09640.2	3UTR,3UTR	0.4036,0.9181	200.9245989,0.0544001
1_3122323	+	T	1.8895	yes	AT1G09640	AT1G09640	AT1G09640.1,AT1G09640.2	3UTR,3UTR	0.437,0.9942	200.9245989,0.0544001
1_3122324	+	T	1.69728	no	AT1G09640	AT1G09640	AT1G09640.1,AT1G09640.2	3UTR,3UTR	0.4396,1	200.9245989,0.0544001
1_3122348	+	C	1.05901	yes	AT1G09640	AT1G09640	AT1G09640.1	3UTR	0.5013	200.9245989
1_3122359	+	T	6.20707	yes	AT1G09640	AT1G09640	AT1G09640.1	3UTR	0.5296	200.9245989
1_3156207	+	G	0.545886	yes	AT1G09740	AT1G09740	AT1G09740.2,AT1G09740.1	3UTR,3UTR	0.663,0.5199	220.2819571,4.7337361
1_3156236	+	A	2.27911	yes	AT1G09740	AT1G09740	AT1G09740.2,AT1G09740.1	3UTR,3UTR	0.7681,0.6023	220.2819571,4.7337361
1_3538131	+	G	1.15997	yes	AT1G10670	ACLA-1	AT1G10670.1,AT1G10670.2,AT1G10670.4,AT1G10670.3	3UTR,3UTR,3UTR,3UTR	0.1749,0.1758,0.1524,0.1758	205.6371336,19.168284,2.9814465,0.0420684
1_3538161	+	G	0.6847	no	AT1G10670	ACLA-1	AT1G10670.1,AT1G10670.2,AT1G10670.4,AT1G10670.3	3UTR,3UTR,3UTR,3UTR	0.3388,0.3407,0.2952,0.3407	205.6371336,19.168284,2.9814465,0.0420684
1_3538162	+	T	5.61363	yes	AT1G10670	ACLA-1	AT1G10670.1,AT1G10670.2,AT1G10670.4,AT1G10670.3	3UTR,3UTR,3UTR,3UTR	0.3443,0.3462,0.3,0.3462	205.6371336,19.168284,2.9814465,0.0420684
1_3538168	+	T	0.282884	yes	AT1G10670	ACLA-1	AT1G10670.1,AT1G10670.2,AT1G10670.4,AT1G10670.3	3UTR,3UTR,3UTR,3UTR	0.377,0.3791,0.3286,0.3791	205.6371336,19.168284,2.9814465,0.0420684
1_3538196	+	T	1.15426	yes	AT1G10670	ACLA-1	AT1G10670.1,AT1G10670.2,AT1G10670.4,AT1G10670.3	3UTR,3UTR,3UTR,3UTR	0.5301,0.533,0.4619,0.533	205.6371336,19.168284,2.9814465,0.0420684
1_3538213	+	G	6.96135	yes	AT1G10670	ACLA-1	AT1G10670.1,AT1G10670.2,AT1G10670.4,AT1G10670.3	3UTR,3UTR,3UTR,3UTR	0.623,0.6264,0.5429,0.6264	205.6371336,19.168284,2.9814465,0.0420684
1_3538221	+	C	0.956786	yes	AT1G10670	ACLA-1	AT1G10670.1,AT1G10670.2,AT1G10670.4,AT1G10670.3	3UTR,3UTR,3UTR,3UTR	0.6667,0.6703,0.581,0.6703	205.6371336,19.168284,2.9814465,0.0420684
1_3538238	+	T	5.98189	yes	AT1G10670	ACLA-1	AT1G10670.1,AT1G10670.2,AT1G10670.4,AT1G10670.3	3UTR,3UTR,3UTR,3UTR	0.7596,0.7637,0.6619,0.7637	205.6371336,19.168284,2.9814465,0.0420684
1_3538239	+	T	3.89769	no	AT1G10670	ACLA-1	AT1G10670.1,AT1G10670.2,AT1G10670.4,AT1G10670.3	3UTR,3UTR,3UTR,3UTR	0.765,0.7692,0.6667,0.7692	205.6371336,19.168284,2.9814465,0.0420684
1_3538240	+	C	1.27725	no	AT1G10670	ACLA-1	AT1G10670.1,AT1G10670.2,AT1G10670.4,AT1G10670.3	3UTR,3UTR,3UTR,3UTR	0.7705,0.7747,0.6714,0.7747	205.6371336,19.168284,2.9814465,0.0420684
1_3538241	+	T	1.44785	no	AT1G10670	ACLA-1	AT1G10670.1,AT1G10670.2,AT1G10670.4,AT1G10670.3	3UTR,3UTR,3UTR,3UTR	0.776,0.7802,0.6762,0.7802	205.6371336,19.168284,2.9814465,0.0420684
1_3538244	+	A	0.690699	no	AT1G10670	ACLA-1	AT1G10670.1,AT1G10670.2,AT1G10670.4,AT1G10670.3	3UTR,3UTR,3UTR,3UTR	0.7923,0.7967,0.6905,0.7967	205.6371336,19.168284,2.9814465,0.0420684
1_3538245	+	G	2.63258	yes	AT1G10670	ACLA-1	AT1G10670.1,AT1G10670.2,AT1G10670.4,AT1G10670.3	3UTR,3UTR,3UTR,3UTR	0.7978,0.8022,0.6952,0.8022	205.6371336,19.168284,2.9814465,0.0420684
1_3663763	+	T	0.341753	yes	AT1G10950	TMN1	AT1G10950.1	3UTR	0.2184	87.3620266
1_3663793	+	T	0.431665	no	AT1G10950	TMN1	AT1G10950.1	3UTR	0.2652	87.3620266
1_3663794	+	C	0.916254	no	AT1G10950	TMN1	AT1G10950.1	3UTR	0.2668	87.3620266
1_3663795	+	T	4.32227	yes	AT1G10950	TMN1	AT1G10950.1	3UTR	0.2683	87.3620266
1_3663805	+	A	0.276581	yes	AT1G10950	TMN1	AT1G10950.1	3UTR	0.2839	87.3620266
1_3663858	+	T	1.02423	yes	AT1G10950	TMN1	AT1G10950.1	3UTR	0.3666	87.3620266
1_3848987	+	A	2.17687	yes	AT1G11430	MORF9	AT1G11430.1	3UTR	0.1684	186.8031543
1_3849020	+	T	0.0130415	no	AT1G11430	MORF9	AT1G11430.1	3UTR	0.2842	186.8031543
1_3849021	+	A	4.47173	yes	AT1G11430	MORF9	AT1G11430.1	3UTR	0.2877	186.8031543
1_3849047	+	C	0.480674	yes	AT1G11430	MORF9	AT1G11430.1	3UTR	0.3789	186.8031543
1_3863848	+	T	2.03087	yes	AT1G11475	NRPB10	AT1G11475.1	3UTR	0.1567	73.5323841
1_3863946	+	T	0.530543	yes	AT1G11475	NRPB10	AT1G11475.1	3UTR	0.5224	73.5323841
1_3917994	+	G	2.71356	yes	AT1G11650	RBP45B	AT1G11650.2,AT1G11650.1	3UTR,3UTR	0.1728,0.5845	227.0660382,0.0419436
1_3917995	+	T	2.4407	no	AT1G11650	RBP45B	AT1G11650.2,AT1G11650.1	3UTR,3UTR	0.1761,0.5868	227.0660382,0.0419436
1_3918007	+	T	5.81969	yes	AT1G11650	RBP45B	AT1G11650.2,AT1G11650.1	3UTR,3UTR	0.2159,0.6142	227.0660382,0.0419436
1_3997664	+	T	2.04326	yes	AT1G11840	ATGLX1	AT1G11840.4,AT1G11840.2,AT1G11840.3,AT1G11840.1,AT1G11840.6,AT1G11840.5	3UTR,3UTR,3UTR,3UTR,3UTR,3UTR	0.4341,0.3251,0.4341,0.3251,0.3737,0.4973	238.9032348,208.7231308,110.8325744,55.7554018,5.2428833,0.4957369
1_3997679	+	G	4.15252	yes	AT1G11840	ATGLX1	AT1G11840.4,AT1G11840.2,AT1G11840.3,AT1G11840.1,AT1G11840.6,AT1G11840.5	3UTR,3UTR,3UTR,3UTR,3UTR,3UTR	0.479,0.3587,0.479,0.3587,0.4124,0.5372	238.9032348,208.7231308,110.8325744,55.7554018,5.2428833,0.4957369
1_3997680	+	T	0.466158	no	AT1G11840	ATGLX1	AT1G11840.4,AT1G11840.2,AT1G11840.3,AT1G11840.1,AT1G11840.6,AT1G11840.5	3UTR,3UTR,3UTR,3UTR,3UTR,3UTR	0.482,0.361,0.482,0.361,0.4149,0.5399	238.9032348,208.7231308,110.8325744,55.7554018,5.2428833,0.4957369
1_3997681	+	T	2.53642	no	AT1G11840	ATGLX1	AT1G11840.4,AT1G11840.2,AT1G11840.3,AT1G11840.1,AT1G11840.6,AT1G11840.5	3UTR,3UTR,3UTR,3UTR,3UTR,3UTR	0.485,0.3632,0.485,0.3632,0.4175,0.5426	238.9032348,208.7231308,110.8325744,55.7554018,5.2428833,0.4957369
1_3997686	+	C	0.463619	yes	AT1G11840	ATGLX1	AT1G11840.4,AT1G11840.2,AT1G11840.3,AT1G11840.1,AT1G11840.6,AT1G11840.5	3UTR,3UTR,3UTR,3UTR,3UTR,3UTR	0.5,0.3744,0.5,0.3744,0.4304,0.5559	238.9032348,208.7231308,110.8325744,55.7554018,5.2428833,0.4957369
1_3997742	+	T	1.39448	yes	AT1G11840	ATGLX1	AT1G11840.4,AT1G11840.2,AT1G11840.3,AT1G11840.1,AT1G11840.6,AT1G11840.5	3UTR,3UTR,3UTR,3UTR,3UTR,3UTR	0.6677,0.5,0.6677,0.5,0.5747,0.7048	238.9032348,208.7231308,110.8325744,55.7554018,5.2428833,0.4957369
1_3997743	+	T	0.712785	no	AT1G11840	ATGLX1	AT1G11840.4,AT1G11840.2,AT1G11840.3,AT1G11840.1,AT1G11840.6,AT1G11840.5	3UTR,3UTR,3UTR,3UTR,3UTR,3UTR	0.6707,0.5022,0.6707,0.5022,0.5773,0.7074	238.9032348,208.7231308,110.8325744,55.7554018,5.2428833,0.4957369
1_4003245	+	A	1.8264	yes	AT1G11860	GDCST	AT1G11860.2,AT1G11860.1,AT1G11860.3	CDS,CDS,CDS	1,1,1	299.3484242,224.8170494,0.4536456
1_4003287	+	T	2.50512	yes	AT1G11860	GDCST	AT1G11860.2,AT1G11860.1,AT1G11860.3	3UTR,3UTR,3UTR	0.2092,0.0817,0.3761	299.3484242,224.8170494,0.4536456
1_4003326	+	G	1.15239	no	AT1G11860	GDCST	AT1G11860.2,AT1G11860.1,AT1G11860.3	3UTR,3UTR,3UTR	0.4082,0.1594,0.7339	299.3484242,224.8170494,0.4536456
1_4003327	+	A	2.67834	no	AT1G11860	GDCST	AT1G11860.2,AT1G11860.1,AT1G11860.3	3UTR,3UTR,3UTR	0.4133,0.1614,0.7431	299.3484242,224.8170494,0.4536456
1_4003328	+	A	5.25047	yes	AT1G11860	GDCST	AT1G11860.2,AT1G11860.1,AT1G11860.3	3UTR,3UTR,3UTR	0.4184,0.1633,0.7523	299.3484242,224.8170494,0.4536456
1_4003329	+	A	1.38803	no	AT1G11860	GDCST	AT1G11860.2,AT1G11860.1,AT1G11860.3	3UTR,3UTR,3UTR	0.4235,0.1653,0.7615	299.3484242,224.8170494,0.4536456
1_4003330	+	A	1.09352	no	AT1G11860	GDCST	AT1G11860.2,AT1G11860.1,AT1G11860.3	3UTR,3UTR,3UTR	0.4286,0.1673,0.7706	299.3484242,224.8170494,0.4536456
1_4012941	+	A	0.59659	yes	AT1G11890	SEC22	AT1G11890.1	3UTR	0.3918	44.5760438
1_4013001	+	T	7.02463	yes	AT1G11890	SEC22	AT1G11890.1	3UTR	0.6157	44.5760438
1_4013002	+	A	1.73796	no	AT1G11890	SEC22	AT1G11890.1	3UTR	0.6194	44.5760438
1_4150718	+	T	0.0867015	yes	AT1G12230	AT1G12230	AT1G12230.1,AT1G12230.2	3UTR,3UTR	0.0285,0.0259	92.9408911,0.5151505
1_4150745	+	C	1.59704	yes	AT1G12230	AT1G12230	AT1G12230.1,AT1G12230.2	3UTR,3UTR	0.1139,0.1037	92.9408911,0.5151505
1_4150790	+	T	5.22827	yes	AT1G12230	AT1G12230	AT1G12230.1,AT1G12230.2	3UTR,3UTR	0.2563,0.2334	92.9408911,0.5151505
1_4150942	+	G	0.358819	yes	AT1G12230	AT1G12230	AT1G12230.1,AT1G12230.2	3UTR,3UTR	0.7373,0.6715	92.9408911,0.5151505
1_4174678	+	C	0.949888	yes	AT1G12270	HOP1	AT1G12270.1	3UTR	0.6623	43.0673056
1_4206248	+	T	5.66806	yes	AT1G12360	KEU	AT1G12360.1	3UTR	0.3021	22.1140968
1_4206262	+	T	6.12308	yes	AT1G12360	KEU	AT1G12360.1	3UTR	0.3431	22.1140968
1_4206263	+	T	2.81267	no	AT1G12360	KEU	AT1G12360.1	3UTR	0.346	22.1140968
1_4206264	+	G	2.97445	no	AT1G12360	KEU	AT1G12360.1	3UTR	0.349	22.1140968
1_4224997	+	T	6.18576	yes	AT1G12410	CLPR2	AT1G12410.1	3UTR	0.1405	162.3562431
1_4224998	+	A	0.267485	no	AT1G12410	CLPR2	AT1G12410.1	3UTR	0.1438	162.3562431
1_4224999	+	T	0.419999	no	AT1G12410	CLPR2	AT1G12410.1	3UTR	0.1472	162.3562431
1_4225038	+	T	2.05929	yes	AT1G12410	CLPR2	AT1G12410.1	3UTR	0.2776	162.3562431
1_4257308	+	A	2.08139	no	AT1G12470	AT1G12470	AT1G12470.1	3UTR	0.5579	14.9083775
1_4257309	+	C	4.35297	yes	AT1G12470	AT1G12470	AT1G12470.1	3UTR	0.5632	14.9083775
1_4257312	+	G	2.37817	yes	AT1G12470	AT1G12470	AT1G12470.1	3UTR	0.5789	14.9083775
1_4350595	+	T	2.35086	yes	AT1G12760	AT1G12760	AT1G12760.1,AT1G12760.2	3UTR,3UTR	0.1708,0.2316	46.517146,0
1_4378252	+	C	1.61264	yes	AT1G12840	VHA-C	AT1G12840.1	3UTR	0.1058	84.2149491
1_4378306	+	T	3.12731	yes	AT1G12840	VHA-C	AT1G12840.1	3UTR	0.2901	84.2149491
1_4378366	+	G	0.660685	yes	AT1G12840	VHA-C	AT1G12840.1	3UTR	0.4949	84.2149491
1_4378371	+	T	2.33796	no	AT1G12840	VHA-C	AT1G12840.1	3UTR	0.5119	84.2149491
1_4378372	+	T	7.50366	no	AT1G12840	VHA-C	AT1G12840.1	3UTR	0.5154	84.2149491
1_4378373	+	T	8.53382	no	AT1G12840	VHA-C	AT1G12840.1	3UTR	0.5188	84.2149491
1_4378374	+	A	6.86269	no	AT1G12840	VHA-C	AT1G12840.1	3UTR	0.5222	84.2149491
1_4378375	+	T	6.88345	no	AT1G12840	VHA-C	AT1G12840.1	3UTR	0.5256	84.2149491
1_4378376	+	T	10.4885	yes	AT1G12840	VHA-C	AT1G12840.1	3UTR	0.529	84.2149491
1_4378443	+	G	1.12646	yes	AT1G12840	VHA-C	AT1G12840.1	3UTR	0.7577	84.2149491
1_4454713	+	T	0.244392	yes	AT1G13060	PBE1	AT1G13060.1,AT1G13060.3,AT1G13060.2	3UTR,3UTR,3UTR	0.2076,0.2311,0.2311	152.8008903,0.0158987,0.0084687
1_4454725	+	A	1.87259	yes	AT1G13060	PBE1	AT1G13060.1,AT1G13060.3,AT1G13060.2	3UTR,3UTR,3UTR	0.2585,0.2877,0.2877	152.8008903,0.0158987,0.0084687
1_4454742	+	G	1.83822	yes	AT1G13060	PBE1	AT1G13060.1,AT1G13060.3,AT1G13060.2	3UTR,3UTR,3UTR	0.3305,0.3679,0.3679	152.8008903,0.0158987,0.0084687
1_4454761	+	A	3.00435	yes	AT1G13060	PBE1	AT1G13060.1,AT1G13060.3,AT1G13060.2	3UTR,3UTR,3UTR	0.411,0.4575,0.4575	152.8008903,0.0158987,0.0084687
1_4454773	+	T	0.758093	yes	AT1G13060	PBE1	AT1G13060.1,AT1G13060.3,AT1G13060.2	3UTR,3UTR,3UTR	0.4619,0.5142,0.5142	152.8008903,0.0158987,0.0084687
1_4454791	+	T	1.29567	yes	AT1G13060	PBE1	AT1G13060.1,AT1G13060.3,AT1G13060.2	3UTR,3UTR,3UTR	0.5381,0.5991,0.5991	152.8008903,0.0158987,0.0084687
1_4840704	+	A	1.58683	yes	AT1G14150	PNSL2	AT1G14150.1	3UTR	0.3737	44.7943642
1_4840705	+	A	0.0936494	no	AT1G14150	PNSL2	AT1G14150.1	3UTR	0.3789	44.7943642
1_4889501	+	T	17.4953	yes	AT1G14320	RPL10A	AT1G14320.1,AT1G14320.2	3UTR,3UTR	0.3119,0.3651	1434.2875469,1.05548
1_4889504	+	A	9.76309	no	AT1G14320	RPL10A	AT1G14320.1,AT1G14320.2	3UTR,3UTR	0.322,0.377	1434.2875469,1.05548
1_4889505	+	G	0.101639	no	AT1G14320	RPL10A	AT1G14320.1,AT1G14320.2	3UTR,3UTR	0.3254,0.381	1434.2875469,1.05548
1_4889506	+	T	9.41571	no	AT1G14320	RPL10A	AT1G14320.1,AT1G14320.2	3UTR,3UTR	0.3288,0.3849	1434.2875469,1.05548
1_4889507	+	T	6.67859	no	AT1G14320	RPL10A	AT1G14320.1,AT1G14320.2	3UTR,3UTR	0.3322,0.3889	1434.2875469,1.05548
1_4889508	+	T	5.0972	no	AT1G14320	RPL10A	AT1G14320.1,AT1G14320.2	3UTR,3UTR	0.3356,0.3929	1434.2875469,1.05548
1_4889509	+	T	16.325	yes	AT1G14320	RPL10A	AT1G14320.1,AT1G14320.2	3UTR,3UTR	0.339,0.3968	1434.2875469,1.05548
1_4889510	+	T	3.66445	no	AT1G14320	RPL10A	AT1G14320.1,AT1G14320.2	3UTR,3UTR	0.3424,0.4008	1434.2875469,1.05548
1_4889511	+	A	1.61908	no	AT1G14320	RPL10A	AT1G14320.1,AT1G14320.2	3UTR,3UTR	0.3458,0.4048	1434.2875469,1.05548
1_4889512	+	G	8.86932	no	AT1G14320	RPL10A	AT1G14320.1,AT1G14320.2	3UTR,3UTR	0.3492,0.4087	1434.2875469,1.05548
1_4889537	+	C	6.59141	no	AT1G14320	RPL10A	AT1G14320.1,AT1G14320.2	3UTR,3UTR	0.4339,0.5079	1434.2875469,1.05548
1_4889538	+	T	3.4238	no	AT1G14320	RPL10A	AT1G14320.1,AT1G14320.2	3UTR,3UTR	0.4373,0.5119	1434.2875469,1.05548
1_4889539	+	T	16.773	yes	AT1G14320	RPL10A	AT1G14320.1,AT1G14320.2	3UTR,3UTR	0.4407,0.5159	1434.2875469,1.05548
1_4889540	+	T	2.00715	no	AT1G14320	RPL10A	AT1G14320.1,AT1G14320.2	3UTR,3UTR	0.4441,0.5198	1434.2875469,1.05548
1_4889553	+	T	0.516577	no	AT1G14320	RPL10A	AT1G14320.1,AT1G14320.2	3UTR,3UTR	0.4881,0.5714	1434.2875469,1.05548
1_4889554	+	G	9.67173	no	AT1G14320	RPL10A	AT1G14320.1,AT1G14320.2	3UTR,3UTR	0.4915,0.5754	1434.2875469,1.05548
1_4889555	+	T	5.27657	no	AT1G14320	RPL10A	AT1G14320.1,AT1G14320.2	3UTR,3UTR	0.4949,0.5794	1434.2875469,1.05548
1_4889556	+	T	24.9692	yes	AT1G14320	RPL10A	AT1G14320.1,AT1G14320.2	3UTR,3UTR	0.4983,0.5833	1434.2875469,1.05548
1_4889557	+	T	0.763839	no	AT1G14320	RPL10A	AT1G14320.1,AT1G14320.2	3UTR,3UTR	0.5017,0.5873	1434.2875469,1.05548
1_5203958	+	T	4.73269	yes	AT1G15120	AT1G15120	AT1G15120.1,AT1G15120.2	3UTR,3UTR	0.1007,0.0289	159.6567849,0.0458139
1_5203960	+	T	11.6574	yes	AT1G15120	AT1G15120	AT1G15120.1,AT1G15120.2	3UTR,3UTR	0.104,0.0372	159.6567849,0.0458139
1_5203982	+	T	10.5206	no	AT1G15120	AT1G15120	AT1G15120.1,AT1G15120.2	3UTR,3UTR	0.1409,0.1281	159.6567849,0.0458139
1_5203983	+	T	15.241	no	AT1G15120	AT1G15120	AT1G15120.1,AT1G15120.2	3UTR,3UTR	0.1426,0.1322	159.6567849,0.0458139
1_5203984	+	T	30.332	no	AT1G15120	AT1G15120	AT1G15120.1,AT1G15120.2	3UTR,3UTR	0.1443,0.1364	159.6567849,0.0458139
1_5203985	+	T	8.48134	no	AT1G15120	AT1G15120	AT1G15120.1,AT1G15120.2	3UTR,3UTR	0.146,0.1405	159.6567849,0.0458139
1_5203986	+	T	16.8746	no	AT1G15120	AT1G15120	AT1G15120.1,AT1G15120.2	3UTR,3UTR	0.1477,0.1446	159.6567849,0.0458139
1_5203987	+	T	37.2644	yes	AT1G15120	AT1G15120	AT1G15120.1,AT1G15120.2	3UTR,3UTR	0.1493,0.1488	159.6567849,0.0458139
1_5203989	+	T	8.93648	yes	AT1G15120	AT1G15120	AT1G15120.1,AT1G15120.2	3UTR,3UTR	0.1527,0.157	159.6567849,0.0458139
1_5204029	+	T	7.49059	yes	AT1G15120	AT1G15120	AT1G15120.1,AT1G15120.2	3UTR,3UTR	0.2198,0.3223	159.6567849,0.0458139
1_5204033	+	T	9.10708	yes	AT1G15120	AT1G15120	AT1G15120.1,AT1G15120.2	3UTR,3UTR	0.2265,0.3388	159.6567849,0.0458139
1_5204042	+	A	5.83132	yes	AT1G15120	AT1G15120	AT1G15120.1,AT1G15120.2	3UTR,3UTR	0.2416,0.376	159.6567849,0.0458139
1_5204044	+	G	5.5011	yes	AT1G15120	AT1G15120	AT1G15120.1,AT1G15120.2	3UTR,3UTR	0.245,0.3843	159.6567849,0.0458139
1_5204045	+	T	4.98883	no	AT1G15120	AT1G15120	AT1G15120.1,AT1G15120.2	3UTR,3UTR	0.2466,0.3884	159.6567849,0.0458139
1_5204046	+	T	3.88234	no	AT1G15120	AT1G15120	AT1G15120.1,AT1G15120.2	3UTR,3UTR	0.2483,0.3926	159.6567849,0.0458139
1_5204059	+	A	8.09167	no	AT1G15120	AT1G15120	AT1G15120.1,AT1G15120.2	3UTR,3UTR	0.2701,0.4463	159.6567849,0.0458139
1_5204060	+	T	11.3506	yes	AT1G15120	AT1G15120	AT1G15120.1,AT1G15120.2	3UTR,3UTR	0.2718,0.4504	159.6567849,0.0458139
1_5204061	+	T	2.15394	no	AT1G15120	AT1G15120	AT1G15120.1,AT1G15120.2	3UTR,3UTR	0.2735,0.4545	159.6567849,0.0458139
1_5204062	+	T	2.9771	no	AT1G15120	AT1G15120	AT1G15120.1,AT1G15120.2	3UTR,3UTR	0.2752,0.4587	159.6567849,0.0458139
1_5204063	+	T	3.63468	no	AT1G15120	AT1G15120	AT1G15120.1,AT1G15120.2	3UTR,3UTR	0.2768,0.4628	159.6567849,0.0458139
1_5204064	+	T	6.99913	no	AT1G15120	AT1G15120	AT1G15120.1,AT1G15120.2	3UTR,3UTR	0.2785,0.4669	159.6567849,0.0458139
1_5204065	+	T	4.52978	no	AT1G15120	AT1G15120	AT1G15120.1,AT1G15120.2	3UTR,3UTR	0.2802,0.4711	159.6567849,0.0458139
1_5328802	+	T	2.19229	yes	AT1G15500	AATP2	AT1G15500.1	3UTR	0.6075	168.7266016
1_5328808	+	T	0.322709	yes	AT1G15500	AATP2	AT1G15500.1	3UTR	0.6398	168.7266016
1_5328821	+	C	0.863594	yes	AT1G15500	AATP2	AT1G15500.1	3UTR	0.7097	168.7266016
1_5328831	+	C	0.182325	yes	AT1G15500	AATP2	AT1G15500.1	3UTR	0.7634	168.7266016
1_5402272	+	T	3.06981	yes	AT1G15690	AVP1	AT1G15690.1,AT1G15690.2	3UTR,3UTR	0.2583,0.1572	427.7635468,1.7364132
1_5402279	+	G	0.333376	no	AT1G15690	AVP1	AT1G15690.1,AT1G15690.2	3UTR,3UTR	0.2793,0.17	427.7635468,1.7364132
1_5402280	+	T	1.0247	yes	AT1G15690	AVP1	AT1G15690.1,AT1G15690.2	3UTR,3UTR	0.2823,0.1718	427.7635468,1.7364132
1_5402302	+	C	2.26714	yes	AT1G15690	AVP1	AT1G15690.1,AT1G15690.2	3UTR,3UTR	0.3483,0.2121	427.7635468,1.7364132
1_5402303	+	C	2.17119	no	AT1G15690	AVP1	AT1G15690.1,AT1G15690.2	3UTR,3UTR	0.3514,0.2139	427.7635468,1.7364132
1_5402306	+	T	1.41432	yes	AT1G15690	AVP1	AT1G15690.1,AT1G15690.2	3UTR,3UTR	0.3604,0.2194	427.7635468,1.7364132
1_5402309	+	T	1.37513	yes	AT1G15690	AVP1	AT1G15690.1,AT1G15690.2	3UTR,3UTR	0.3694,0.2249	427.7635468,1.7364132
1_5402325	+	T	5.84602	yes	AT1G15690	AVP1	AT1G15690.1,AT1G15690.2	3UTR,3UTR	0.4174,0.2541	427.7635468,1.7364132
1_5402326	+	T	4.58519	no	AT1G15690	AVP1	AT1G15690.1,AT1G15690.2	3UTR,3UTR	0.4204,0.2559	427.7635468,1.7364132
1_5402382	+	T	0.841662	yes	AT1G15690	AVP1	AT1G15690.1,AT1G15690.2	3UTR,3UTR	0.5886,0.3583	427.7635468,1.7364132
1_5402383	+	T	0.205229	no	AT1G15690	AVP1	AT1G15690.1,AT1G15690.2	3UTR,3UTR	0.5916,0.3601	427.7635468,1.7364132
1_5414850	+	A	0.624539	yes	AT1G15740	AT1G15740	AT1G15740.1	3UTR	0.8155	28.4880914
1_5471647	+	A	2.9273	yes	AT1G15930	RPS12A	AT1G15930.1	5UTR	0.7849	14.4120451
1_5471665	+	T	0.398478	yes	AT1G15930	RPS12A	AT1G15930.2,AT1G15930.1	5UTR,5UTR	0.3208,0.8566	521.0835569,14.4120451
1_5471675	+	G	4.53074	yes	AT1G15930	RPS12A	AT1G15930.2,AT1G15930.1	5UTR,5UTR	0.5094,0.8964	521.0835569,14.4120451
1_5472769	+	T	0.252325	yes	AT1G15930	RPS12A	AT1G15930.2,AT1G15930.1	3UTR,3UTR	0.0882,0.0993	521.0835569,14.4120451
1_5472797	+	T	7.6893	yes	AT1G15930	RPS12A	AT1G15930.2,AT1G15930.1	3UTR,3UTR	0.1797,0.2022	521.0835569,14.4120451
1_5472848	+	A	1.68224	yes	AT1G15930	RPS12A	AT1G15930.2,AT1G15930.1	3UTR,3UTR	0.3464,0.3897	521.0835569,14.4120451
1_5472853	+	T	3.32939	yes	AT1G15930	RPS12A	AT1G15930.2,AT1G15930.1	3UTR,3UTR	0.3627,0.4081	521.0835569,14.4120451
1_5472856	+	G	3.07369	no	AT1G15930	RPS12A	AT1G15930.2,AT1G15930.1	3UTR,3UTR	0.3725,0.4191	521.0835569,14.4120451
1_5472857	+	G	10.8283	yes	AT1G15930	RPS12A	AT1G15930.2,AT1G15930.1	3UTR,3UTR	0.3758,0.4228	521.0835569,14.4120451
1_5472869	+	G	0.270365	no	AT1G15930	RPS12A	AT1G15930.2,AT1G15930.1	3UTR,3UTR	0.415,0.4669	521.0835569,14.4120451
1_5472870	+	T	7.13937	yes	AT1G15930	RPS12A	AT1G15930.2,AT1G15930.1	3UTR,3UTR	0.4183,0.4706	521.0835569,14.4120451
1_5472871	+	T	5.34252	no	AT1G15930	RPS12A	AT1G15930.2,AT1G15930.1	3UTR,3UTR	0.4216,0.4743	521.0835569,14.4120451
1_5472878	+	T	23.3338	yes	AT1G15930	RPS12A	AT1G15930.2,AT1G15930.1	3UTR,3UTR	0.4444,0.5	521.0835569,14.4120451
1_5472879	+	T	16.3672	no	AT1G15930	RPS12A	AT1G15930.2,AT1G15930.1	3UTR,3UTR	0.4477,0.5037	521.0835569,14.4120451
1_5472880	+	A	9.66878	no	AT1G15930	RPS12A	AT1G15930.2,AT1G15930.1	3UTR,3UTR	0.451,0.5074	521.0835569,14.4120451
1_5472881	+	T	9.12827	no	AT1G15930	RPS12A	AT1G15930.2,AT1G15930.1	3UTR,3UTR	0.4542,0.511	521.0835569,14.4120451
1_5472882	+	C	3.36345	no	AT1G15930	RPS12A	AT1G15930.2,AT1G15930.1	3UTR,3UTR	0.4575,0.5147	521.0835569,14.4120451
1_5472888	+	T	12.2826	no	AT1G15930	RPS12A	AT1G15930.2,AT1G15930.1	3UTR,3UTR	0.4771,0.5368	521.0835569,14.4120451
1_5472889	+	T	6.43601	no	AT1G15930	RPS12A	AT1G15930.2,AT1G15930.1	3UTR,3UTR	0.4804,0.5404	521.0835569,14.4120451
1_5472890	+	T	12.5998	yes	AT1G15930	RPS12A	AT1G15930.2,AT1G15930.1	3UTR,3UTR	0.4837,0.5441	521.0835569,14.4120451
1_5472891	+	A	3.3649	no	AT1G15930	RPS12A	AT1G15930.2,AT1G15930.1	3UTR,3UTR	0.4869,0.5478	521.0835569,14.4120451
1_5472895	+	T	13.784	yes	AT1G15930	RPS12A	AT1G15930.2,AT1G15930.1	3UTR,3UTR	0.5,0.5625	521.0835569,14.4120451
1_5481980	+	G	0.428331	yes	AT1G15950	CCR1	AT1G15950.1,AT1G15950.2	3UTR,3UTR	0.2424,0.1395	117.0316056,0.0060233
1_5482027	+	T	0.0258036	yes	AT1G15950	CCR1	AT1G15950.1,AT1G15950.2	3UTR,3UTR	0.4205,0.3581	117.0316056,0.0060233
1_5482038	+	T	1.67463	yes	AT1G15950	CCR1	AT1G15950.1,AT1G15950.2	3UTR,3UTR	0.4621,0.4093	117.0316056,0.0060233
1_5482040	+	C	1.67463	yes	AT1G15950	CCR1	AT1G15950.1,AT1G15950.2	3UTR,3UTR	0.4697,0.4186	117.0316056,0.0060233
1_5482132	+	C	2.22433	yes	AT1G15950	CCR1	AT1G15950.1,AT1G15950.2	3UTR,3UTR	0.8182,0.8465	117.0316056,0.0060233
1_5515848	+	T	2.40949	yes	AT1G16080	AT1G16080	AT1G16080.1	3UTR	0.3245	71.2493707
1_5515858	+	A	0.729997	yes	AT1G16080	AT1G16080	AT1G16080.1	3UTR	0.3623	71.2493707
1_5542752	+	A	0.227261	no	AT1G16180	AT1G16180	AT1G16180.2,AT1G16180.1	3UTR,3UTR	0.3506,0.3506	81.353615,50.016653
1_5542753	+	G	1.763	yes	AT1G16180	AT1G16180	AT1G16180.2,AT1G16180.1	3UTR,3UTR	0.355,0.355	81.353615,50.016653
1_5542755	+	A	4.2348	yes	AT1G16180	AT1G16180	AT1G16180.2,AT1G16180.1	3UTR,3UTR	0.3636,0.3636	81.353615,50.016653
1_5542764	+	G	2.44625	no	AT1G16180	AT1G16180	AT1G16180.2,AT1G16180.1	3UTR,3UTR	0.4026,0.4026	81.353615,50.016653
1_5542765	+	C	1.14272	no	AT1G16180	AT1G16180	AT1G16180.2,AT1G16180.1	3UTR,3UTR	0.4069,0.4069	81.353615,50.016653
1_5542766	+	T	1.83243	no	AT1G16180	AT1G16180	AT1G16180.2,AT1G16180.1	3UTR,3UTR	0.4113,0.4113	81.353615,50.016653
1_5542767	+	T	2.58148	no	AT1G16180	AT1G16180	AT1G16180.2,AT1G16180.1	3UTR,3UTR	0.4156,0.4156	81.353615,50.016653
1_5542768	+	A	6.89344	yes	AT1G16180	AT1G16180	AT1G16180.2,AT1G16180.1	3UTR,3UTR	0.4199,0.4199	81.353615,50.016653
1_5542769	+	A	2.55206	no	AT1G16180	AT1G16180	AT1G16180.2,AT1G16180.1	3UTR,3UTR	0.4242,0.4242	81.353615,50.016653
1_5542794	+	T	1.28356	yes	AT1G16180	AT1G16180	AT1G16180.2,AT1G16180.1	3UTR,3UTR	0.5325,0.5325	81.353615,50.016653
1_5542801	+	T	0.427166	yes	AT1G16180	AT1G16180	AT1G16180.2,AT1G16180.1	3UTR,3UTR	0.5628,0.5628	81.353615,50.016653
1_5711726	+	T	0.116873	yes	AT1G16700	AT1G16700	AT1G16700.1	3UTR	0.0891	123.6917978
1_5711739	+	T	2.55748	yes	AT1G16700	AT1G16700	AT1G16700.1	3UTR	0.1264	123.6917978
1_5711784	+	G	0.05945	yes	AT1G16700	AT1G16700	AT1G16700.1	3UTR	0.2557	123.6917978
1_5711785	+	T	0.05945	no	AT1G16700	AT1G16700	AT1G16700.1	3UTR	0.2586	123.6917978
1_5711799	+	A	0.937584	yes	AT1G16700	AT1G16700	AT1G16700.1	3UTR	0.2989	123.6917978
1_5711801	+	T	0.764864	no	AT1G16700	AT1G16700	AT1G16700.1	3UTR	0.3046	123.6917978
1_5711802	+	T	6.29051	yes	AT1G16700	AT1G16700	AT1G16700.1	3UTR	0.3075	123.6917978
1_5711864	+	G	0.336692	yes	AT1G16700	AT1G16700	AT1G16700.1	3UTR	0.4856	123.6917978
1_5726319	+	T	1.28434	no	AT1G16720	HCF173	AT1G16720.1	3UTR	0.3057	50.4514355
1_5726320	+	A	1.00745	no	AT1G16720	HCF173	AT1G16720.1	3UTR	0.31	50.4514355
1_5726321	+	C	1.97831	no	AT1G16720	HCF173	AT1G16720.1	3UTR	0.3144	50.4514355
1_5726322	+	A	0.348546	no	AT1G16720	HCF173	AT1G16720.1	3UTR	0.3188	50.4514355
1_5726323	+	T	4.04283	yes	AT1G16720	HCF173	AT1G16720.1	3UTR	0.3231	50.4514355
1_5726327	+	T	3.01223	no	AT1G16720	HCF173	AT1G16720.1	3UTR	0.3406	50.4514355
1_5726328	+	A	1.75577	no	AT1G16720	HCF173	AT1G16720.1	3UTR	0.345	50.4514355
1_5726329	+	C	2.76001	no	AT1G16720	HCF173	AT1G16720.1	3UTR	0.3493	50.4514355
1_5726330	+	A	5.15739	yes	AT1G16720	HCF173	AT1G16720.1	3UTR	0.3537	50.4514355
1_5726366	+	C	0.479675	no	AT1G16720	HCF173	AT1G16720.1	3UTR	0.5109	50.4514355
1_5726367	+	T	1.44603	no	AT1G16720	HCF173	AT1G16720.1	3UTR	0.5153	50.4514355
1_5726368	+	T	1.68447	yes	AT1G16720	HCF173	AT1G16720.1	3UTR	0.5197	50.4514355
1_5756771	+	G	0.468041	no	AT1G16810	AT1G16810	AT1G16810.2,AT1G16810.1	3UTR,3UTR	0.38,0.38	78.0969289,0.6155042
1_5756772	+	T	0.518353	no	AT1G16810	AT1G16810	AT1G16810.2,AT1G16810.1	3UTR,3UTR	0.385,0.385	78.0969289,0.6155042
1_5756773	+	T	0.573304	yes	AT1G16810	AT1G16810	AT1G16810.2,AT1G16810.1	3UTR,3UTR	0.39,0.39	78.0969289,0.6155042
1_5776184	+	T	3.00076	no	AT1G16880	ACR11	AT1G16880.1	3UTR	0.3187	145.5493712
1_5776185	+	T	8.66606	no	AT1G16880	ACR11	AT1G16880.1	3UTR	0.3242	145.5493712
1_5776186	+	T	16.0634	no	AT1G16880	ACR11	AT1G16880.1	3UTR	0.3297	145.5493712
1_5776187	+	T	17.191	yes	AT1G16880	ACR11	AT1G16880.1	3UTR	0.3352	145.5493712
1_5776188	+	T	3.32999	no	AT1G16880	ACR11	AT1G16880.1	3UTR	0.3407	145.5493712
1_5776192	+	T	4.45526	no	AT1G16880	ACR11	AT1G16880.1	3UTR	0.3626	145.5493712
1_5776193	+	T	5.59636	yes	AT1G16880	ACR11	AT1G16880.1	3UTR	0.3681	145.5493712
1_5776194	+	T	1.12704	no	AT1G16880	ACR11	AT1G16880.1	3UTR	0.3736	145.5493712
1_5776206	+	A	0.307682	no	AT1G16880	ACR11	AT1G16880.1	3UTR	0.4396	145.5493712
1_5776207	+	A	0.942757	yes	AT1G16880	ACR11	AT1G16880.1	3UTR	0.4451	145.5493712
1_5776222	+	T	2.46917	no	AT1G16880	ACR11	AT1G16880.1	3UTR	0.5275	145.5493712
1_5776223	+	A	0.50959	no	AT1G16880	ACR11	AT1G16880.1	3UTR	0.533	145.5493712
1_5776224	+	C	2.79124	yes	AT1G16880	ACR11	AT1G16880.1	3UTR	0.5385	145.5493712
1_5776228	+	T	6.13572	no	AT1G16880	ACR11	AT1G16880.1	3UTR	0.5604	145.5493712
1_5776229	+	G	6.15442	yes	AT1G16880	ACR11	AT1G16880.1	3UTR	0.5659	145.5493712
1_5776259	+	A	4.84656	yes	AT1G16880	ACR11	AT1G16880.1	3UTR	0.7308	145.5493712
1_5776260	+	T	1.40812	no	AT1G16880	ACR11	AT1G16880.1	3UTR	0.7363	145.5493712
1_5776266	+	T	0.150995	yes	AT1G16880	ACR11	AT1G16880.1	3UTR	0.7692	145.5493712
1_5831285	+	T	0.521911	yes	AT1G17050	SPS2	AT1G17050.1	3UTR	0.4132	24.138647
1_5831306	+	A	2.34348	yes	AT1G17050	SPS2	AT1G17050.1	3UTR	0.5389	24.138647
1_5856524	+	T	1.79189	no	AT1G17130	AT1G17130	AT1G17130.1,AT1G17130.2	3UTR,3UTR	0.2277,0.2277	21.7344364,4.6988462
1_5856525	+	T	2.67565	yes	AT1G17130	AT1G17130	AT1G17130.1,AT1G17130.2	3UTR,3UTR	0.2321,0.2321	21.7344364,4.6988462
1_5856550	+	A	0.72881	yes	AT1G17130	AT1G17130	AT1G17130.1,AT1G17130.2	3UTR,3UTR	0.3438,0.3438	21.7344364,4.6988462
1_5879922	+	T	1.21382	yes	AT1G17200	AT1G17200	AT1G17200.1,AT1G17200.2	3UTR,3UTR	0.2488,0.2959	89.0049573,0.0929504
1_5879934	+	T	0.72993	yes	AT1G17200	AT1G17200	AT1G17200.1,AT1G17200.2	3UTR,3UTR	0.3085,0.3669	89.0049573,0.0929504
1_5890336	+	A	1.38706	no	AT1G17220	FUG1	AT1G17220.1	3UTR	0.509	58.1094152
1_5890337	+	A	2.74041	no	AT1G17220	FUG1	AT1G17220.1	3UTR	0.512	58.1094152
1_5890338	+	A	2.80109	yes	AT1G17220	FUG1	AT1G17220.1	3UTR	0.515	58.1094152
1_5890339	+	A	1.53617	no	AT1G17220	FUG1	AT1G17220.1	3UTR	0.518	58.1094152
1_5890343	+	T	0.0203875	no	AT1G17220	FUG1	AT1G17220.1	3UTR	0.5299	58.1094152
1_5890344	+	G	2.77284	yes	AT1G17220	FUG1	AT1G17220.1	3UTR	0.5329	58.1094152
1_5890349	+	A	0.235662	yes	AT1G17220	FUG1	AT1G17220.1	3UTR	0.5479	58.1094152
1_5926133	+	A	0.380107	yes	AT1G17290	ALAAT1	AT1G17290.1	3UTR	0.1275	78.4993295
1_5926163	+	T	0.0410967	yes	AT1G17290	ALAAT1	AT1G17290.1	3UTR	0.2255	78.4993295
1_5926248	+	C	3.44438	no	AT1G17290	ALAAT1	AT1G17290.1	3UTR	0.5033	78.4993295
1_5926249	+	T	7.23061	no	AT1G17290	ALAAT1	AT1G17290.1	3UTR	0.5065	78.4993295
1_5926250	+	T	7.78173	yes	AT1G17290	ALAAT1	AT1G17290.1	3UTR	0.5098	78.4993295
1_5926251	+	T	1.44542	no	AT1G17290	ALAAT1	AT1G17290.1	3UTR	0.5131	78.4993295
1_6006279	+	G	1.13977	yes	AT1G17470	DRG1	AT1G17470.1,AT1G17470.2	3UTR,3UTR	0.4843,0.494	68.4065149,1.9713679
1_6006293	+	T	0.770145	no	AT1G17470	DRG1	AT1G17470.1,AT1G17470.2	3UTR,3UTR	0.5394,0.5502	68.4065149,1.9713679
1_6006294	+	T	4.36417	no	AT1G17470	DRG1	AT1G17470.1,AT1G17470.2	3UTR,3UTR	0.5433,0.5542	68.4065149,1.9713679
1_6006295	+	A	1.04462	no	AT1G17470	DRG1	AT1G17470.1,AT1G17470.2	3UTR,3UTR	0.5472,0.5582	68.4065149,1.9713679
1_6006296	+	C	0.0153342	no	AT1G17470	DRG1	AT1G17470.1,AT1G17470.2	3UTR,3UTR	0.5512,0.5622	68.4065149,1.9713679
1_6006297	+	T	0.648015	no	AT1G17470	DRG1	AT1G17470.1,AT1G17470.2	3UTR,3UTR	0.5551,0.5663	68.4065149,1.9713679
1_6006298	+	T	1.45583	no	AT1G17470	DRG1	AT1G17470.1,AT1G17470.2	3UTR,3UTR	0.5591,0.5703	68.4065149,1.9713679
1_6006299	+	T	5.9292	yes	AT1G17470	DRG1	AT1G17470.1,AT1G17470.2	3UTR,3UTR	0.563,0.5743	68.4065149,1.9713679
1_6006300	+	T	0.115054	no	AT1G17470	DRG1	AT1G17470.1,AT1G17470.2	3UTR,3UTR	0.5669,0.5783	68.4065149,1.9713679
1_6038791	+	A	0.672366	no	AT1G17570	AT1G17570	AT1G17570.1	CDS	0.4198	NA
1_6038792	+	A	5.0615	yes	AT1G17570	AT1G17570	AT1G17570.1	CDS	0.4321	NA
1_6038804	+	T	0.691449	yes	AT1G17570	AT1G17570	AT1G17570.1	CDS	0.5802	NA
1_6038822	+	A	25.4393	yes	AT1G17570	AT1G17570	AT1G17570.1	CDS	0.8025	NA
1_6223963	+	T	10.2622	yes	AT1G18080	RACK1A	AT1G18080.1	3UTR	0.1794	694.7863631
1_6223967	+	T	0.771125	yes	AT1G18080	RACK1A	AT1G18080.1	3UTR	0.1912	694.7863631
1_6223969	+	T	4.71722	yes	AT1G18080	RACK1A	AT1G18080.1	3UTR	0.1971	694.7863631
1_6223970	+	T	3.81903	no	AT1G18080	RACK1A	AT1G18080.1	3UTR	0.2	694.7863631
1_6223971	+	T	4.16915	no	AT1G18080	RACK1A	AT1G18080.1	3UTR	0.2029	694.7863631
1_6223982	+	C	8.39174	yes	AT1G18080	RACK1A	AT1G18080.1	3UTR	0.2353	694.7863631
1_6223998	+	G	0.135811	yes	AT1G18080	RACK1A	AT1G18080.1	3UTR	0.2824	694.7863631
1_6425733	+	T	0.53233	yes	AT1G18660	AT1G18660	AT1G18660.1,AT1G18660.3,AT1G18660.2,AT1G18660.4	3UTR,3UTR,3UTR,3UTR	0.503,0.5235,0.503,0.6231	11.4431538,4.5230167,3.007117,0.0719379
1_6425751	+	T	2.2615	yes	AT1G18660	AT1G18660	AT1G18660.1,AT1G18660.3,AT1G18660.2,AT1G18660.4	3UTR,3UTR,3UTR,3UTR	0.5572,0.5799,0.5572,0.6692	11.4431538,4.5230167,3.007117,0.0719379
1_6425752	+	T	1.40228	no	AT1G18660	AT1G18660	AT1G18660.1,AT1G18660.3,AT1G18660.2,AT1G18660.4	3UTR,3UTR,3UTR,3UTR	0.5602,0.5831,0.5602,0.6718	11.4431538,4.5230167,3.007117,0.0719379
1_6425753	+	A	0.847572	no	AT1G18660	AT1G18660	AT1G18660.1,AT1G18660.3,AT1G18660.2,AT1G18660.4	3UTR,3UTR,3UTR,3UTR	0.5633,0.5862,0.5633,0.6744	11.4431538,4.5230167,3.007117,0.0719379
1_6425754	+	A	0.286134	no	AT1G18660	AT1G18660	AT1G18660.1,AT1G18660.3,AT1G18660.2,AT1G18660.4	3UTR,3UTR,3UTR,3UTR	0.5663,0.5893,0.5663,0.6769	11.4431538,4.5230167,3.007117,0.0719379
1_6425812	+	A	2.25238	yes	AT1G18660	AT1G18660	AT1G18660.1,AT1G18660.3,AT1G18660.2,AT1G18660.4	3UTR,3UTR,3UTR,3UTR	0.741,0.7712,0.741,0.8256	11.4431538,4.5230167,3.007117,0.0719379
1_6462164	+	C	3.49098	yes	AT1G18730	PNSB4	AT1G18730.1,AT1G18730.3,AT1G18730.4,AT1G18730.2,AT1G18730.5	3UTR,3UTR,3UTR,3UTR,3UTR	0.2373,0.4828,0.7391,0.7391,0.2902	22.3638359,20.1877781,0.4641407,0.1634676,0.082631
1_6462180	+	T	1.05729	no	AT1G18730	PNSB4	AT1G18730.1,AT1G18730.3,AT1G18730.4,AT1G18730.2,AT1G18730.5	3UTR,3UTR,3UTR,3UTR,3UTR	0.3051,0.6207,0.8087,0.8087,0.3731	22.3638359,20.1877781,0.4641407,0.1634676,0.082631
1_6462181	+	A	1.86811	yes	AT1G18730	PNSB4	AT1G18730.1,AT1G18730.3,AT1G18730.4,AT1G18730.2,AT1G18730.5	3UTR,3UTR,3UTR,3UTR,3UTR	0.3093,0.6293,0.813,0.813,0.3782	22.3638359,20.1877781,0.4641407,0.1634676,0.082631
1_6488719	+	A	17.8363	yes	AT1G18820	AT1G18820	AT1G18820.1	CDS	0.8	NA
1_6913287	+	T	1.40978	yes	AT1G19910	VHA-C2	AT1G19910.1,AT1G19910.2	5UTR,5UTR	0.9079,0.8657	479.1335565,0.5774646
1_6913296	+	G	2.59806	yes	AT1G19910	VHA-C2	AT1G19910.1,AT1G19910.2	5UTR,5UTR	0.9365,0.9074	479.1335565,0.5774646
1_6913716	+	G	0.53233	yes	AT1G19910	VHA-C2	AT1G19910.1,AT1G19910.2	CDS,CDS	0.7544,0.7439	479.1335565,0.5774646
1_6914389	+	T	6.66614	yes	AT1G19910	VHA-C2	AT1G19910.1,AT1G19910.2	3UTR,3UTR	0.2435,0.4482	479.1335565,0.5774646
1_6914404	+	T	7.42846	no	AT1G19910	VHA-C2	AT1G19910.1,AT1G19910.2	3UTR,3UTR	0.2989,0.482	479.1335565,0.5774646
1_6914405	+	T	10.4749	no	AT1G19910	VHA-C2	AT1G19910.1,AT1G19910.2	3UTR,3UTR	0.3026,0.4842	479.1335565,0.5774646
1_6914406	+	T	12.0508	yes	AT1G19910	VHA-C2	AT1G19910.1,AT1G19910.2	3UTR,3UTR	0.3063,0.4865	479.1335565,0.5774646
1_6914407	+	T	5.64121	no	AT1G19910	VHA-C2	AT1G19910.1,AT1G19910.2	3UTR,3UTR	0.31,0.4887	479.1335565,0.5774646
1_6914411	+	G	7.44022	yes	AT1G19910	VHA-C2	AT1G19910.1,AT1G19910.2	3UTR,3UTR	0.3247,0.4977	479.1335565,0.5774646
1_6914475	+	T	0.809833	no	AT1G19910	VHA-C2	AT1G19910.1,AT1G19910.2	3UTR,3UTR	0.5609,0.6419	479.1335565,0.5774646
1_6914476	+	T	1.39552	no	AT1G19910	VHA-C2	AT1G19910.1,AT1G19910.2	3UTR,3UTR	0.5646,0.6441	479.1335565,0.5774646
1_6914477	+	T	6.08883	yes	AT1G19910	VHA-C2	AT1G19910.1,AT1G19910.2	3UTR,3UTR	0.5683,0.6464	479.1335565,0.5774646
1_6914478	+	C	4.07889	no	AT1G19910	VHA-C2	AT1G19910.1,AT1G19910.2	3UTR,3UTR	0.572,0.6486	479.1335565,0.5774646
1_6914479	+	T	0.394407	no	AT1G19910	VHA-C2	AT1G19910.1,AT1G19910.2	3UTR,3UTR	0.5756,0.6509	479.1335565,0.5774646
1_6914482	+	T	12.089	yes	AT1G19910	VHA-C2	AT1G19910.1,AT1G19910.2	3UTR,3UTR	0.5867,0.6577	479.1335565,0.5774646
1_6914483	+	T	7.38385	no	AT1G19910	VHA-C2	AT1G19910.1,AT1G19910.2	3UTR,3UTR	0.5904,0.6599	479.1335565,0.5774646
1_6914484	+	C	0.0426578	no	AT1G19910	VHA-C2	AT1G19910.1,AT1G19910.2	3UTR,3UTR	0.5941,0.6622	479.1335565,0.5774646
1_6914486	+	T	8.47167	no	AT1G19910	VHA-C2	AT1G19910.1,AT1G19910.2	3UTR,3UTR	0.6015,0.6667	479.1335565,0.5774646
1_6914487	+	T	23.3407	yes	AT1G19910	VHA-C2	AT1G19910.1,AT1G19910.2	3UTR,3UTR	0.6052,0.6689	479.1335565,0.5774646
1_6914488	+	T	8.52285	no	AT1G19910	VHA-C2	AT1G19910.1,AT1G19910.2	3UTR,3UTR	0.6089,0.6712	479.1335565,0.5774646
1_6914491	+	A	1.84966	no	AT1G19910	VHA-C2	AT1G19910.1,AT1G19910.2	3UTR,3UTR	0.6199,0.6779	479.1335565,0.5774646
1_6914492	+	C	5.74041	yes	AT1G19910	VHA-C2	AT1G19910.1,AT1G19910.2	3UTR,3UTR	0.6236,0.6802	479.1335565,0.5774646
1_6914495	+	T	0.679719	no	AT1G19910	VHA-C2	AT1G19910.1,AT1G19910.2	3UTR,3UTR	0.6347,0.6869	479.1335565,0.5774646
1_6914496	+	A	9.74023	no	AT1G19910	VHA-C2	AT1G19910.1,AT1G19910.2	3UTR,3UTR	0.6384,0.6892	479.1335565,0.5774646
1_6914497	+	T	21.9668	yes	AT1G19910	VHA-C2	AT1G19910.1,AT1G19910.2	3UTR,3UTR	0.6421,0.6914	479.1335565,0.5774646
1_6914498	+	A	15.1866	no	AT1G19910	VHA-C2	AT1G19910.1,AT1G19910.2	3UTR,3UTR	0.6458,0.6937	479.1335565,0.5774646
1_6914499	+	T	5.49163	no	AT1G19910	VHA-C2	AT1G19910.1,AT1G19910.2	3UTR,3UTR	0.6494,0.6959	479.1335565,0.5774646
1_6914511	+	A	0.853497	no	AT1G19910	VHA-C2	AT1G19910.1,AT1G19910.2	3UTR,3UTR	0.6937,0.723	479.1335565,0.5774646
1_6914512	+	A	4.39657	yes	AT1G19910	VHA-C2	AT1G19910.1,AT1G19910.2	3UTR,3UTR	0.6974,0.7252	479.1335565,0.5774646
1_6914516	+	G	1.3524	yes	AT1G19910	VHA-C2	AT1G19910.1,AT1G19910.2	3UTR,3UTR	0.7122,0.7342	479.1335565,0.5774646
1_6944918	+	A	0.0902966	yes	AT1G20020	LFNR2	AT1G20020.1,AT1G20020.2,AT1G20020.3	3UTR,3UTR,3UTR	0.2207,0.2768,0.3333	242.9697949,6.8218692,0.0170166
1_6944942	+	T	1.10308	no	AT1G20020	LFNR2	AT1G20020.1,AT1G20020.2,AT1G20020.3	3UTR,3UTR,3UTR	0.3288,0.4124,0.4966	242.9697949,6.8218692,0.0170166
1_6944943	+	T	2.91692	yes	AT1G20020	LFNR2	AT1G20020.1,AT1G20020.2,AT1G20020.3	3UTR,3UTR,3UTR	0.3333,0.4181,0.5034	242.9697949,6.8218692,0.0170166
1_6944947	+	A	0.0322972	yes	AT1G20020	LFNR2	AT1G20020.1,AT1G20020.2,AT1G20020.3	3UTR,3UTR,3UTR	0.3514,0.4407,0.5306	242.9697949,6.8218692,0.0170166
1_6944952	+	A	4.6045	no	AT1G20020	LFNR2	AT1G20020.1,AT1G20020.2,AT1G20020.3	3UTR,3UTR,3UTR	0.3739,0.4689,0.5646	242.9697949,6.8218692,0.0170166
1_6944953	+	A	5.99605	yes	AT1G20020	LFNR2	AT1G20020.1,AT1G20020.2,AT1G20020.3	3UTR,3UTR,3UTR	0.3784,0.4746,0.5714	242.9697949,6.8218692,0.0170166
1_6944954	+	G	1.51064	no	AT1G20020	LFNR2	AT1G20020.1,AT1G20020.2,AT1G20020.3	3UTR,3UTR,3UTR	0.3829,0.4802,0.5782	242.9697949,6.8218692,0.0170166
1_6944955	+	T	1.26052	no	AT1G20020	LFNR2	AT1G20020.1,AT1G20020.2,AT1G20020.3	3UTR,3UTR,3UTR	0.3874,0.4859,0.585	242.9697949,6.8218692,0.0170166
1_6944957	+	T	0.82431	yes	AT1G20020	LFNR2	AT1G20020.1,AT1G20020.2,AT1G20020.3	3UTR,3UTR,3UTR	0.3964,0.4972,0.5986	242.9697949,6.8218692,0.0170166
1_6944959	+	T	4.62662	no	AT1G20020	LFNR2	AT1G20020.1,AT1G20020.2,AT1G20020.3	3UTR,3UTR,3UTR	0.4054,0.5085,0.6122	242.9697949,6.8218692,0.0170166
1_6944960	+	T	6.16013	yes	AT1G20020	LFNR2	AT1G20020.1,AT1G20020.2,AT1G20020.3	3UTR,3UTR,3UTR	0.4099,0.5141,0.619	242.9697949,6.8218692,0.0170166
1_6944965	+	A	0.110486	yes	AT1G20020	LFNR2	AT1G20020.1,AT1G20020.2,AT1G20020.3	3UTR,3UTR,3UTR	0.4324,0.5424,0.6531	242.9697949,6.8218692,0.0170166
1_6944987	+	C	3.32327	yes	AT1G20020	LFNR2	AT1G20020.1,AT1G20020.2,AT1G20020.3	3UTR,3UTR,3UTR	0.5315,0.6667,0.8027	242.9697949,6.8218692,0.0170166
1_6968843	+	A	0.586235	yes	AT1G20090	ARAC4	AT1G20090.1	3UTR	0.5901	64.8771556
1_6974647	+	T	2.21875	yes	AT1G20110	AT1G20110	AT1G20110.1	3UTR	0.1234	47.7456078
1_6974710	+	T	4.16258	yes	AT1G20110	AT1G20110	AT1G20110.1	3UTR	0.2377	47.7456078
1_6974755	+	T	0.586234	yes	AT1G20110	AT1G20110	AT1G20110.1	3UTR	0.3194	47.7456078
1_7020329	+	T	0.543594	no	AT1G20260	VHA-B3	AT1G20260.1	3UTR	0.0952	141.2514846
1_7020330	+	A	2.14816	yes	AT1G20260	VHA-B3	AT1G20260.1	3UTR	0.0977	141.2514846
1_7020429	+	C	2.37133	no	AT1G20260	VHA-B3	AT1G20260.1	3UTR	0.3459	141.2514846
1_7020430	+	A	3.12164	yes	AT1G20260	VHA-B3	AT1G20260.1	3UTR	0.3484	141.2514846
1_7020431	+	T	0.973479	no	AT1G20260	VHA-B3	AT1G20260.1	3UTR	0.3509	141.2514846
1_7020460	+	C	3.08004	yes	AT1G20260	VHA-B3	AT1G20260.1	3UTR	0.4236	141.2514846
1_7020474	+	T	1.24829	no	AT1G20260	VHA-B3	AT1G20260.1	3UTR	0.4586	141.2514846
1_7020475	+	A	2.60345	no	AT1G20260	VHA-B3	AT1G20260.1	3UTR	0.4612	141.2514846
1_7020476	+	T	5.03577	no	AT1G20260	VHA-B3	AT1G20260.1	3UTR	0.4637	141.2514846
1_7020477	+	T	11.0681	yes	AT1G20260	VHA-B3	AT1G20260.1	3UTR	0.4662	141.2514846
1_7020487	+	C	1.20796	no	AT1G20260	VHA-B3	AT1G20260.1	3UTR	0.4912	141.2514846
1_7020488	+	T	6.17441	yes	AT1G20260	VHA-B3	AT1G20260.1	3UTR	0.4937	141.2514846
1_7146327	+	G	0.306443	yes	AT1G20620	CAT3	AT1G20620.1,AT1G20620.6,AT1G20620.2,AT1G20620.5,AT1G20620.4,AT1G20620.7	3UTR,3UTR,3UTR,3UTR,3UTR,3UTR	0.3844,0.3844,0.4754,0.47,0.3844,0.4754	582.0838618,1.4757001,0.5288053,0.4636155,0.4032816,0.1685886
1_7146328	+	T	0.306443	no	AT1G20620	CAT3	AT1G20620.1,AT1G20620.6,AT1G20620.2,AT1G20620.5,AT1G20620.4,AT1G20620.7	3UTR,3UTR,3UTR,3UTR,3UTR,3UTR	0.3873,0.3873,0.4778,0.4735,0.3873,0.4778	582.0838618,1.4757001,0.5288053,0.4636155,0.4032816,0.1685886
1_7146356	+	T	3.85642	yes	AT1G20620	CAT3	AT1G20620.1,AT1G20620.6,AT1G20620.2,AT1G20620.5,AT1G20620.4,AT1G20620.7	3UTR,3UTR,3UTR,3UTR,3UTR,3UTR	0.4682,0.4682,0.5468,0.5724,0.4682,0.5468	582.0838618,1.4757001,0.5288053,0.4636155,0.4032816,0.1685886
1_7178601	+	T	0.773979	yes	AT1G20693	HMGB2	AT1G20693.1,AT1G20693.2,AT1G20693.3	3UTR,3UTR,3UTR	0.2776,0.3404,0.3404	290.6840528,0.0975804,0.0444572
1_7178661	+	G	2.25239	yes	AT1G20693	HMGB2	AT1G20693.1,AT1G20693.2,AT1G20693.3	3UTR,3UTR,3UTR	0.4251,0.5211,0.5211	290.6840528,0.0975804,0.0444572
1_7178700	+	T	2.02945	no	AT1G20693	HMGB2	AT1G20693.1,AT1G20693.2,AT1G20693.3	3UTR,3UTR,3UTR	0.5209,0.6386,0.6386	290.6840528,0.0975804,0.0444572
1_7178701	+	T	5.85786	yes	AT1G20693	HMGB2	AT1G20693.1,AT1G20693.2,AT1G20693.3	3UTR,3UTR,3UTR	0.5233,0.6416,0.6416	290.6840528,0.0975804,0.0444572
1_7181275	+	T	0.125013	no	AT1G20696	HMGB3	AT1G20696.1,AT1G20696.5,AT1G20696.4,AT1G20696.3,AT1G20696.2	3UTR,3UTR,3UTR,3UTR,3UTR	0.2513,0.2885,0.2506,0.2857,0.2656	162.4500523,0.8051622,0.2230733,0.0138743,0
1_7181276	+	T	1.67489	yes	AT1G20696	HMGB3	AT1G20696.1,AT1G20696.5,AT1G20696.4,AT1G20696.3,AT1G20696.2	3UTR,3UTR,3UTR,3UTR,3UTR	0.2538,0.291,0.2531,0.2885,0.2689	162.4500523,0.8051622,0.2230733,0.0138743,0
1_7181277	+	T	1.37933	no	AT1G20696	HMGB3	AT1G20696.1,AT1G20696.5,AT1G20696.4,AT1G20696.3,AT1G20696.2	3UTR,3UTR,3UTR,3UTR,3UTR	0.2563,0.2934,0.2556,0.2912,0.2721	162.4500523,0.8051622,0.2230733,0.0138743,0
1_7181310	+	T	2.55878	yes	AT1G20696	HMGB3	AT1G20696.1,AT1G20696.5,AT1G20696.4,AT1G20696.3,AT1G20696.2	3UTR,3UTR,3UTR,3UTR,3UTR	0.3392,0.3741,0.3383,0.3819,0.3803	162.4500523,0.8051622,0.2230733,0.0138743,0
1_7181380	+	T	2.97239	yes	AT1G20696	HMGB3	AT1G20696.1,AT1G20696.5,AT1G20696.4,AT1G20696.3,AT1G20696.2	3UTR,3UTR,3UTR,3UTR,3UTR	0.5151,0.5452,0.5138,0.5742,0.6098	162.4500523,0.8051622,0.2230733,0.0138743,0
1_7181381	+	T	0.160642	no	AT1G20696	HMGB3	AT1G20696.1,AT1G20696.5,AT1G20696.4,AT1G20696.3,AT1G20696.2	3UTR,3UTR,3UTR,3UTR,3UTR	0.5176,0.5477,0.5163,0.5769,0.6131	162.4500523,0.8051622,0.2230733,0.0138743,0
1_7233491	+	C	0.975699	yes	AT1G20810	FKBP18	AT1G20810.1,AT1G20810.2	3UTR,3UTR	0.4256,0.7349	16.7042535,1.4904973
1_7375702	+	G	1.98787	yes	AT1G21065	AT1G21065	AT1G21065.1	3UTR	0.3958	64.7330379
1_7375717	+	T	0.463988	yes	AT1G21065	AT1G21065	AT1G21065.1	3UTR	0.5	64.7330379
1_7375723	+	T	11.281	yes	AT1G21065	AT1G21065	AT1G21065.1	3UTR	0.5417	64.7330379
1_7375724	+	T	3.40745	no	AT1G21065	AT1G21065	AT1G21065.1	3UTR	0.5486	64.7330379
1_7375750	+	T	0.513952	yes	AT1G21065	AT1G21065	AT1G21065.1	3UTR	0.7292	64.7330379
1_7375763	+	G	0.379741	yes	AT1G21065	AT1G21065	AT1G21065.1	3UTR	0.8194	64.7330379
1_7588042	+	T	0.505058	yes	AT1G21630	AT1G21630	AT1G21630.1,AT1G21630.3,AT1G21630.2,AT1G21630.4	3UTR,3UTR,3UTR,3UTR	0.6882,0.9007,0.698,0.9176	26.9204442,0.0292646,0.0145687,0
1_7592778	+	T	2.37099	yes	AT1G21640	NADK2	AT1G21640.1,AT1G21640.2	3UTR,3UTR	0.4909,0.6708	19.3062574,0.0562621
1_7608935	+	T	1.81347	yes	AT1G21660	AT1G21660	AT1G21660.1	3UTR	0.2558	30.5017847
1_7628127	+	T	0.625977	yes	AT1G21720	PBC1	AT1G21720.1	3UTR	0.2557	91.3207556
1_7628169	+	T	2.46392	yes	AT1G21720	PBC1	AT1G21720.1	3UTR	0.4475	91.3207556
1_7628170	+	T	1.62022	no	AT1G21720	PBC1	AT1G21720.1	3UTR	0.4521	91.3207556
1_7714334	+	A	0.0106807	no	AT1G21930	AT1G21930	AT1G21930.1	3UTR	0.2188	37.1312328
1_7714335	+	T	1.50501	yes	AT1G21930	AT1G21930	AT1G21930.1	3UTR	0.225	37.1312328
1_7714374	+	G	2.33195	yes	AT1G21930	AT1G21930	AT1G21930.1	3UTR	0.4688	37.1312328
1_7914785	+	G	0.813885	no	AT1G22410	AT1G22410	AT1G22410.1	3UTR	0.1609	222.293504
1_7914786	+	T	1.51027	yes	AT1G22410	AT1G22410	AT1G22410.1	3UTR	0.1648	222.293504
1_7914794	+	T	1.75049	yes	AT1G22410	AT1G22410	AT1G22410.1	3UTR	0.1954	222.293504
1_7914812	+	A	0.412606	no	AT1G22410	AT1G22410	AT1G22410.1	3UTR	0.2644	222.293504
1_7914813	+	T	0.785528	no	AT1G22410	AT1G22410	AT1G22410.1	3UTR	0.2682	222.293504
1_7914814	+	T	2.21875	no	AT1G22410	AT1G22410	AT1G22410.1	3UTR	0.272	222.293504
1_7914815	+	T	3.00999	no	AT1G22410	AT1G22410	AT1G22410.1	3UTR	0.2759	222.293504
1_7914816	+	A	3.04044	yes	AT1G22410	AT1G22410	AT1G22410.1	3UTR	0.2797	222.293504
1_7926927	+	A	0.761956	yes	AT1G22450	COX6B-1	AT1G22450.1	3UTR	0.0188	140.4293612
1_7926990	+	T	2.13069	no	AT1G22450	COX6B-1	AT1G22450.1	3UTR	0.1667	140.4293612
1_7926991	+	T	0.17692	no	AT1G22450	COX6B-1	AT1G22450.1	3UTR	0.169	140.4293612
1_7926992	+	T	1.69983	no	AT1G22450	COX6B-1	AT1G22450.1	3UTR	0.1714	140.4293612
1_7926993	+	T	3.06258	yes	AT1G22450	COX6B-1	AT1G22450.1	3UTR	0.1737	140.4293612
1_8052811	+	A	3.70817	yes	AT1G22750	AT1G22750	AT1G22750.4,AT1G22750.2,AT1G22750.3,AT1G22750.1	3UTR,3UTR,3UTR,3UTR	0.4615,0.6007,0.6737,0.6316	21.6324469,14.5983829,11.926616,8.1514397
1_8052815	+	T	1.58248	yes	AT1G22750	AT1G22750	AT1G22750.4,AT1G22750.2,AT1G22750.3,AT1G22750.1	3UTR,3UTR,3UTR,3UTR	0.4808,0.6141,0.6877,0.6447	21.6324469,14.5983829,11.926616,8.1514397
1_8052839	+	T	0.531023	no	AT1G22750	AT1G22750	AT1G22750.4,AT1G22750.2,AT1G22750.3,AT1G22750.1	3UTR,3UTR,3UTR,3UTR	0.5962,0.6946,0.7719,0.7237	21.6324469,14.5983829,11.926616,8.1514397
1_8052840	+	T	1.20113	yes	AT1G22750	AT1G22750	AT1G22750.4,AT1G22750.2,AT1G22750.3,AT1G22750.1	3UTR,3UTR,3UTR,3UTR	0.601,0.698,0.7754,0.727	21.6324469,14.5983829,11.926616,8.1514397
1_8052854	+	T	3.50692	no	AT1G22750	AT1G22750	AT1G22750.4,AT1G22750.2,AT1G22750.3,AT1G22750.1	3UTR,3UTR,3UTR,3UTR	0.6683,0.745,0.8246,0.773	21.6324469,14.5983829,11.926616,8.1514397
1_8052855	+	T	4.27209	yes	AT1G22750	AT1G22750	AT1G22750.4,AT1G22750.2,AT1G22750.3,AT1G22750.1	3UTR,3UTR,3UTR,3UTR	0.6731,0.7483,0.8281,0.7763	21.6324469,14.5983829,11.926616,8.1514397
1_8069207	+	T	0.790185	yes	AT1G22780	RPS18A	AT1G22780.1	3UTR	0.224	540.127389
1_8069215	+	T	5.25914	yes	AT1G22780	RPS18A	AT1G22780.1	3UTR	0.2656	540.127389
1_8069234	+	T	4.78784	no	AT1G22780	RPS18A	AT1G22780.1	3UTR	0.3646	540.127389
1_8069235	+	T	16.337	yes	AT1G22780	RPS18A	AT1G22780.1	3UTR	0.3698	540.127389
1_8069247	+	G	1.4956	no	AT1G22780	RPS18A	AT1G22780.1	3UTR	0.4323	540.127389
1_8069248	+	T	6.23899	no	AT1G22780	RPS18A	AT1G22780.1	3UTR	0.4375	540.127389
1_8069249	+	T	7.79562	no	AT1G22780	RPS18A	AT1G22780.1	3UTR	0.4427	540.127389
1_8069250	+	T	9.10131	yes	AT1G22780	RPS18A	AT1G22780.1	3UTR	0.4479	540.127389
1_8069251	+	C	0.682356	no	AT1G22780	RPS18A	AT1G22780.1	3UTR	0.4531	540.127389
1_8069252	+	A	1.76106	no	AT1G22780	RPS18A	AT1G22780.1	3UTR	0.4583	540.127389
1_8069257	+	A	0.0950871	yes	AT1G22780	RPS18A	AT1G22780.1	3UTR	0.4844	540.127389
1_8069267	+	T	0.00637253	yes	AT1G22780	RPS18A	AT1G22780.1	3UTR	0.5365	540.127389
1_8069273	+	T	3.57526	no	AT1G22780	RPS18A	AT1G22780.1	3UTR	0.5677	540.127389
1_8069274	+	T	1.14427	no	AT1G22780	RPS18A	AT1G22780.1	3UTR	0.5729	540.127389
1_8069275	+	A	5.9999	yes	AT1G22780	RPS18A	AT1G22780.1	3UTR	0.5781	540.127389
1_8069276	+	C	4.82923	no	AT1G22780	RPS18A	AT1G22780.1	3UTR	0.5833	540.127389
1_8069290	+	A	0.228176	yes	AT1G22780	RPS18A	AT1G22780.1	3UTR	0.6562	540.127389
1_8080352	+	T	1.47491	yes	AT1G22840	CYTC-1	AT1G22840.1,AT1G22840.2	3UTR,3UTR	0.2265,0.3211	564.5803023,0.0097595
1_8080387	+	T	2.00113	no	AT1G22840	CYTC-1	AT1G22840.1,AT1G22840.2	3UTR,3UTR	0.3484,0.4281	564.5803023,0.0097595
1_8080388	+	T	2.40384	yes	AT1G22840	CYTC-1	AT1G22840.1,AT1G22840.2	3UTR,3UTR	0.3519,0.4312	564.5803023,0.0097595
1_8080389	+	A	0.115017	no	AT1G22840	CYTC-1	AT1G22840.1,AT1G22840.2	3UTR,3UTR	0.3554,0.4343	564.5803023,0.0097595
1_8080398	+	T	4.45766	yes	AT1G22840	CYTC-1	AT1G22840.1,AT1G22840.2	3UTR,3UTR	0.3868,0.4618	564.5803023,0.0097595
1_8080402	+	T	2.87453	yes	AT1G22840	CYTC-1	AT1G22840.1,AT1G22840.2	3UTR,3UTR	0.4007,0.474	564.5803023,0.0097595
1_8080443	+	T	1.17858	no	AT1G22840	CYTC-1	AT1G22840.1,AT1G22840.2	3UTR,3UTR	0.5436,0.5994	564.5803023,0.0097595
1_8080444	+	T	10.8853	yes	AT1G22840	CYTC-1	AT1G22840.1,AT1G22840.2	3UTR,3UTR	0.547,0.6024	564.5803023,0.0097595
1_8080445	+	T	9.23787	no	AT1G22840	CYTC-1	AT1G22840.1,AT1G22840.2	3UTR,3UTR	0.5505,0.6055	564.5803023,0.0097595
1_8080446	+	A	1.19625	no	AT1G22840	CYTC-1	AT1G22840.1,AT1G22840.2	3UTR,3UTR	0.554,0.6086	564.5803023,0.0097595
1_8080452	+	T	0.409229	yes	AT1G22840	CYTC-1	AT1G22840.1,AT1G22840.2	3UTR,3UTR	0.5749,0.6269	564.5803023,0.0097595
1_8224245	+	T	1.47435	no	AT1G23190	PGM3	AT1G23190.1	3UTR	0.1611	90.8668386
1_8224246	+	T	5.55952	yes	AT1G23190	PGM3	AT1G23190.1	3UTR	0.1639	90.8668386
1_8224247	+	A	3.00583	no	AT1G23190	PGM3	AT1G23190.1	3UTR	0.1667	90.8668386
1_8224253	+	T	1.71501	yes	AT1G23190	PGM3	AT1G23190.1	3UTR	0.1833	90.8668386
1_8263482	+	T	1.90397	no	AT1G23290	RPL27AB	AT1G23290.1	3UTR	0.1168	786.9921007
1_8263483	+	C	7.61666	yes	AT1G23290	RPL27AB	AT1G23290.1	3UTR	0.1203	786.9921007
1_8263485	+	T	2.10232	no	AT1G23290	RPL27AB	AT1G23290.1	3UTR	0.1271	786.9921007
1_8263486	+	G	3.57895	no	AT1G23290	RPL27AB	AT1G23290.1	3UTR	0.1306	786.9921007
1_8263487	+	T	4.42494	no	AT1G23290	RPL27AB	AT1G23290.1	3UTR	0.134	786.9921007
1_8263488	+	T	16.0141	yes	AT1G23290	RPL27AB	AT1G23290.1	3UTR	0.1375	786.9921007
1_8263489	+	A	3.92858	no	AT1G23290	RPL27AB	AT1G23290.1	3UTR	0.1409	786.9921007
1_8263490	+	T	2.45829	no	AT1G23290	RPL27AB	AT1G23290.1	3UTR	0.1443	786.9921007
1_8263491	+	T	2.67272	no	AT1G23290	RPL27AB	AT1G23290.1	3UTR	0.1478	786.9921007
1_8263497	+	C	0.938871	yes	AT1G23290	RPL27AB	AT1G23290.1	3UTR	0.1684	786.9921007
1_8263502	+	T	0.299207	yes	AT1G23290	RPL27AB	AT1G23290.1	3UTR	0.1856	786.9921007
1_8263504	+	G	0.456528	yes	AT1G23290	RPL27AB	AT1G23290.1	3UTR	0.1924	786.9921007
1_8263509	+	A	1.33336	no	AT1G23290	RPL27AB	AT1G23290.1	3UTR	0.2096	786.9921007
1_8263510	+	T	2.35312	yes	AT1G23290	RPL27AB	AT1G23290.1	3UTR	0.2131	786.9921007
1_8263511	+	T	1.86425	no	AT1G23290	RPL27AB	AT1G23290.1	3UTR	0.2165	786.9921007
1_8263517	+	A	3.83168	yes	AT1G23290	RPL27AB	AT1G23290.1	3UTR	0.2371	786.9921007
1_8263525	+	T	0.0985714	no	AT1G23290	RPL27AB	AT1G23290.1	3UTR	0.2646	786.9921007
1_8263526	+	C	3.6496	no	AT1G23290	RPL27AB	AT1G23290.1	3UTR	0.268	786.9921007
1_8263527	+	T	3.09054	no	AT1G23290	RPL27AB	AT1G23290.1	3UTR	0.2715	786.9921007
1_8263528	+	T	1.3763	no	AT1G23290	RPL27AB	AT1G23290.1	3UTR	0.2749	786.9921007
1_8263529	+	T	10.4069	yes	AT1G23290	RPL27AB	AT1G23290.1	3UTR	0.2784	786.9921007
1_8263530	+	T	2.02213	no	AT1G23290	RPL27AB	AT1G23290.1	3UTR	0.2818	786.9921007
1_8338477	+	T	1.24291	no	AT1G23490	ARF2-A	AT1G23490.1	3UTR	0.2274	225.6848424
1_8338478	+	T	4.2794	no	AT1G23490	ARF2-A	AT1G23490.1	3UTR	0.2296	225.6848424
1_8338479	+	T	6.02418	yes	AT1G23490	ARF2-A	AT1G23490.1	3UTR	0.2318	225.6848424
1_8338501	+	T	6.73634	yes	AT1G23490	ARF2-A	AT1G23490.1	3UTR	0.2804	225.6848424
1_8338502	+	T	2.32524	no	AT1G23490	ARF2-A	AT1G23490.1	3UTR	0.2826	225.6848424
1_8338503	+	T	0.804006	no	AT1G23490	ARF2-A	AT1G23490.1	3UTR	0.2848	225.6848424
1_8338507	+	G	4.3587	no	AT1G23490	ARF2-A	AT1G23490.1	3UTR	0.2936	225.6848424
1_8338508	+	A	0.781196	no	AT1G23490	ARF2-A	AT1G23490.1	3UTR	0.2958	225.6848424
1_8338509	+	T	7.41433	yes	AT1G23490	ARF2-A	AT1G23490.1	3UTR	0.298	225.6848424
1_8338512	+	T	11.4779	yes	AT1G23490	ARF2-A	AT1G23490.1	3UTR	0.3046	225.6848424
1_8338538	+	T	0.898457	no	AT1G23490	ARF2-A	AT1G23490.1	3UTR	0.362	225.6848424
1_8338539	+	T	2.13245	no	AT1G23490	ARF2-A	AT1G23490.1	3UTR	0.3642	225.6848424
1_8338540	+	T	0.470221	no	AT1G23490	ARF2-A	AT1G23490.1	3UTR	0.3664	225.6848424
1_8338541	+	T	2.52123	yes	AT1G23490	ARF2-A	AT1G23490.1	3UTR	0.3687	225.6848424
1_8338546	+	A	3.18038	yes	AT1G23490	ARF2-A	AT1G23490.1	3UTR	0.3797	225.6848424
1_8338549	+	T	1.52002	yes	AT1G23490	ARF2-A	AT1G23490.1	3UTR	0.3863	225.6848424
1_8508562	+	T	2.54723	yes	AT1G24050	AT1G24050	AT1G24050.1	3UTR	0.2601	114.1180941
1_8508569	+	T	0.711117	yes	AT1G24050	AT1G24050	AT1G24050.1	3UTR	0.2751	114.1180941
1_8508617	+	A	0.626726	yes	AT1G24050	AT1G24050	AT1G24050.1	3UTR	0.3774	114.1180941
1_8508637	+	A	1.19332	yes	AT1G24050	AT1G24050	AT1G24050.1	3UTR	0.42	114.1180941
1_8508660	+	T	4.60623	yes	AT1G24050	AT1G24050	AT1G24050.1	3UTR	0.4691	114.1180941
1_8508714	+	T	7.43967	yes	AT1G24050	AT1G24050	AT1G24050.1	3UTR	0.5842	114.1180941
1_8508715	+	A	3.89468	no	AT1G24050	AT1G24050	AT1G24050.1	3UTR	0.5864	114.1180941
1_8508716	+	T	5.28856	no	AT1G24050	AT1G24050	AT1G24050.1	3UTR	0.5885	114.1180941
1_8508717	+	T	6.34746	no	AT1G24050	AT1G24050	AT1G24050.1	3UTR	0.5906	114.1180941
1_8508718	+	T	2.62216	no	AT1G24050	AT1G24050	AT1G24050.1	3UTR	0.5928	114.1180941
1_8508741	+	T	0.107103	yes	AT1G24050	AT1G24050	AT1G24050.1	3UTR	0.6418	114.1180941
1_8508744	+	G	6.91756	yes	AT1G24050	AT1G24050	AT1G24050.1	3UTR	0.6482	114.1180941
1_8643391	+	G	1.81143	yes	AT1G24360	AT1G24360	AT1G24360.1	3UTR	0.4886	160.4224196
1_8643404	+	C	0.992344	yes	AT1G24360	AT1G24360	AT1G24360.1	3UTR	0.5479	160.4224196
1_8643433	+	T	0.457393	yes	AT1G24360	AT1G24360	AT1G24360.1	3UTR	0.6804	160.4224196
1_8866720	+	G	0.0827747	no	AT1G25280	TULP10	AT1G25280.1,AT1G25280.2	3UTR,3UTR	0.3895,0.5663	23.85961,0.1045411
1_8866721	+	C	1.6701	no	AT1G25280	TULP10	AT1G25280.1,AT1G25280.2	3UTR,3UTR	0.393,0.5714	23.85961,0.1045411
1_8866722	+	T	1.22638	no	AT1G25280	TULP10	AT1G25280.1,AT1G25280.2	3UTR,3UTR	0.3965,0.5765	23.85961,0.1045411
1_8866723	+	G	0.693492	no	AT1G25280	TULP10	AT1G25280.1,AT1G25280.2	3UTR,3UTR	0.4,0.5816	23.85961,0.1045411
1_8866724	+	T	1.92888	yes	AT1G25280	TULP10	AT1G25280.1,AT1G25280.2	3UTR,3UTR	0.4035,0.5867	23.85961,0.1045411
1_8866727	+	T	0.678488	yes	AT1G25280	TULP10	AT1G25280.1,AT1G25280.2	3UTR,3UTR	0.414,0.602	23.85961,0.1045411
1_8964331	+	T	0.611617	yes	AT1G25520	AT1G25520	AT1G25520.1	3UTR	0.1649	35.2574432
1_9172787	+	G	1.14818	yes	AT1G26550	AT1G26550	AT1G26550.1	3UTR	0.2215	309.297668
1_9172789	+	T	5.18213	yes	AT1G26550	AT1G26550	AT1G26550.1	3UTR	0.2278	309.297668
1_9172790	+	T	0.633437	no	AT1G26550	AT1G26550	AT1G26550.1	3UTR	0.231	309.297668
1_9172823	+	T	0.748722	yes	AT1G26550	AT1G26550	AT1G26550.1	3UTR	0.3354	309.297668
1_9172852	+	T	0.688411	no	AT1G26550	AT1G26550	AT1G26550.1	3UTR	0.4272	309.297668
1_9172853	+	A	0.95484	yes	AT1G26550	AT1G26550	AT1G26550.1	3UTR	0.4304	309.297668
1_9172868	+	T	3.69645	yes	AT1G26550	AT1G26550	AT1G26550.1	3UTR	0.4778	309.297668
1_9172869	+	T	0.631129	no	AT1G26550	AT1G26550	AT1G26550.1	3UTR	0.481	309.297668
1_9172899	+	T	5.09382	yes	AT1G26550	AT1G26550	AT1G26550.1	3UTR	0.5759	309.297668
1_9205900	+	T	3.13291	no	AT1G26630	ELF5A-2	AT1G26630.1,AT1G26630.2	5UTR,5UTR	0.5988,0.4885	1184.9323022,2.1091548
1_9205901	+	T	4.16472	no	AT1G26630	ELF5A-2	AT1G26630.1,AT1G26630.2	5UTR,5UTR	0.6048,0.4962	1184.9323022,2.1091548
1_9205902	+	T	7.52453	yes	AT1G26630	ELF5A-2	AT1G26630.1,AT1G26630.2	5UTR,5UTR	0.6108,0.5038	1184.9323022,2.1091548
1_9205903	+	T	4.18725	no	AT1G26630	ELF5A-2	AT1G26630.1,AT1G26630.2	5UTR,5UTR	0.6168,0.5115	1184.9323022,2.1091548
1_9205904	+	T	0.468862	no	AT1G26630	ELF5A-2	AT1G26630.1,AT1G26630.2	5UTR,5UTR	0.6228,0.5191	1184.9323022,2.1091548
1_9205905	+	T	0.986207	no	AT1G26630	ELF5A-2	AT1G26630.1,AT1G26630.2	5UTR,5UTR	0.6287,0.5267	1184.9323022,2.1091548
1_9205906	+	T	2.20516	no	AT1G26630	ELF5A-2	AT1G26630.1,AT1G26630.2	5UTR,5UTR	0.6347,0.5344	1184.9323022,2.1091548
1_9205963	+	A	5.18549	yes	AT1G26630	ELF5A-2	AT1G26630.1,AT1G26630.2	5UTR,5UTR	0.976,0.9695	1184.9323022,2.1091548
1_9207169	+	T	0.767694	yes	AT1G26630	ELF5A-2	AT1G26630.1,AT1G26630.2	3UTR,3UTR	0.2201,0.4201	1184.9323022,2.1091548
1_9207200	+	G	2.56466	yes	AT1G26630	ELF5A-2	AT1G26630.1,AT1G26630.2	3UTR,3UTR	0.3176,0.5041	1184.9323022,2.1091548
1_9207202	+	T	10.6808	no	AT1G26630	ELF5A-2	AT1G26630.1,AT1G26630.2	3UTR,3UTR	0.3239,0.5095	1184.9323022,2.1091548
1_9207203	+	T	12.2061	yes	AT1G26630	ELF5A-2	AT1G26630.1,AT1G26630.2	3UTR,3UTR	0.327,0.5122	1184.9323022,2.1091548
1_9207207	+	G	12.1365	no	AT1G26630	ELF5A-2	AT1G26630.1,AT1G26630.2	3UTR,3UTR	0.3396,0.523	1184.9323022,2.1091548
1_9207208	+	T	22.2137	yes	AT1G26630	ELF5A-2	AT1G26630.1,AT1G26630.2	3UTR,3UTR	0.3428,0.5257	1184.9323022,2.1091548
1_9207222	+	T	7.43881	yes	AT1G26630	ELF5A-2	AT1G26630.1,AT1G26630.2	3UTR,3UTR	0.3868,0.5637	1184.9323022,2.1091548
1_9207250	+	G	18.1473	yes	AT1G26630	ELF5A-2	AT1G26630.1,AT1G26630.2	3UTR,3UTR	0.4748,0.6396	1184.9323022,2.1091548
1_9207251	+	T	10.1911	no	AT1G26630	ELF5A-2	AT1G26630.1,AT1G26630.2	3UTR,3UTR	0.478,0.6423	1184.9323022,2.1091548
1_9207265	+	T	0.826545	yes	AT1G26630	ELF5A-2	AT1G26630.1,AT1G26630.2	3UTR,3UTR	0.522,0.6802	1184.9323022,2.1091548
1_9207273	+	T	18.0674	yes	AT1G26630	ELF5A-2	AT1G26630.1,AT1G26630.2	3UTR,3UTR	0.5472,0.7019	1184.9323022,2.1091548
1_9207274	+	T	1.97588	no	AT1G26630	ELF5A-2	AT1G26630.1,AT1G26630.2	3UTR,3UTR	0.5503,0.7046	1184.9323022,2.1091548
1_9207275	+	C	0.433656	no	AT1G26630	ELF5A-2	AT1G26630.1,AT1G26630.2	3UTR,3UTR	0.5535,0.7073	1184.9323022,2.1091548
1_9207276	+	T	17.2874	no	AT1G26630	ELF5A-2	AT1G26630.1,AT1G26630.2	3UTR,3UTR	0.5566,0.71	1184.9323022,2.1091548
1_9217895	+	T	6.46533	yes	AT1G26670	VTI12	AT1G26670.1	3UTR	0.4676	50.0503666
1_9217896	+	T	1.14067	no	AT1G26670	VTI12	AT1G26670.1	3UTR	0.4722	50.0503666
1_9217897	+	G	0.853307	no	AT1G26670	VTI12	AT1G26670.1	3UTR	0.4769	50.0503666
1_9217898	+	T	1.37856	no	AT1G26670	VTI12	AT1G26670.1	3UTR	0.4815	50.0503666
1_9217901	+	T	1.82562	yes	AT1G26670	VTI12	AT1G26670.1	3UTR	0.4954	50.0503666
1_9217902	+	G	1.65513	no	AT1G26670	VTI12	AT1G26670.1	3UTR	0.5	50.0503666
1_9217903	+	A	0.660161	no	AT1G26670	VTI12	AT1G26670.1	3UTR	0.5046	50.0503666
1_9376612	+	G	3.52042	no	AT1G27000	AT1G27000	AT1G27000.1	3UTR	0.4667	104.3550924
1_9376613	+	T	2.99846	no	AT1G27000	AT1G27000	AT1G27000.1	3UTR	0.4691	104.3550924
1_9376614	+	T	0.373533	no	AT1G27000	AT1G27000	AT1G27000.1	3UTR	0.4716	104.3550924
1_9376615	+	T	18.3287	yes	AT1G27000	AT1G27000	AT1G27000.1	3UTR	0.4741	104.3550924
1_9376616	+	A	6.09842	no	AT1G27000	AT1G27000	AT1G27000.1	3UTR	0.4765	104.3550924
1_9376627	+	T	3.0449	yes	AT1G27000	AT1G27000	AT1G27000.1	3UTR	0.5037	104.3550924
1_9376644	+	C	3.20342	yes	AT1G27000	AT1G27000	AT1G27000.1	3UTR	0.5457	104.3550924
1_9494001	+	G	0.66584	yes	AT1G27330	AT1G27330	AT1G27330.1	3UTR	0.2112	95.1279657
1_9494008	+	T	1.77698	no	AT1G27330	AT1G27330	AT1G27330.1	3UTR	0.2257	95.1279657
1_9494009	+	T	3.89847	yes	AT1G27330	AT1G27330	AT1G27330.1	3UTR	0.2277	95.1279657
1_9516743	+	T	8.30798	yes	AT1G27400	RPL17A	AT1G27400.1	3UTR	0.0494	366.8064797
1_9516770	+	A	2.28846	yes	AT1G27400	RPL17A	AT1G27400.1	3UTR	0.1279	366.8064797
1_9516775	+	T	0.0564684	yes	AT1G27400	RPL17A	AT1G27400.1	3UTR	0.1424	366.8064797
1_9516783	+	G	1.40642	yes	AT1G27400	RPL17A	AT1G27400.1	3UTR	0.1657	366.8064797
1_9516789	+	C	1.50832	yes	AT1G27400	RPL17A	AT1G27400.1	3UTR	0.1831	366.8064797
1_9516793	+	A	3.76224	yes	AT1G27400	RPL17A	AT1G27400.1	3UTR	0.1948	366.8064797
1_9516794	+	T	2.65137	no	AT1G27400	RPL17A	AT1G27400.1	3UTR	0.1977	366.8064797
1_9533857	+	A	2.08848	no	AT1G27450	APT1	AT1G27450.4,AT1G27450.1,AT1G27450.2,AT1G27450.3	3UTR,3UTR,3UTR,3UTR	0.1601,0.1471,0.1601,0.2103	355.3565652,24.4484943,1.9985924,0.9438364
1_9533858	+	T	2.85727	no	AT1G27450	APT1	AT1G27450.4,AT1G27450.1,AT1G27450.2,AT1G27450.3	3UTR,3UTR,3UTR,3UTR	0.1634,0.1502,0.1634,0.2146	355.3565652,24.4484943,1.9985924,0.9438364
1_9533859	+	G	5.389	yes	AT1G27450	APT1	AT1G27450.4,AT1G27450.1,AT1G27450.2,AT1G27450.3	3UTR,3UTR,3UTR,3UTR	0.1667,0.1532,0.1667,0.2189	355.3565652,24.4484943,1.9985924,0.9438364
1_9533872	+	T	1.72225	yes	AT1G27450	APT1	AT1G27450.4,AT1G27450.1,AT1G27450.2,AT1G27450.3	3UTR,3UTR,3UTR,3UTR	0.2092,0.1922,0.2092,0.2747	355.3565652,24.4484943,1.9985924,0.9438364
1_9533873	+	T	1.71138	no	AT1G27450	APT1	AT1G27450.4,AT1G27450.1,AT1G27450.2,AT1G27450.3	3UTR,3UTR,3UTR,3UTR	0.2124,0.1952,0.2124,0.279	355.3565652,24.4484943,1.9985924,0.9438364
1_9533956	+	T	2.73923	yes	AT1G27450	APT1	AT1G27450.4,AT1G27450.1,AT1G27450.2,AT1G27450.3	3UTR,3UTR,3UTR,3UTR	0.4837,0.4444,0.4837,0.6352	355.3565652,24.4484943,1.9985924,0.9438364
1_9533965	+	C	1.51334	yes	AT1G27450	APT1	AT1G27450.4,AT1G27450.1,AT1G27450.2,AT1G27450.3	3UTR,3UTR,3UTR,3UTR	0.5131,0.4715,0.5131,0.6738	355.3565652,24.4484943,1.9985924,0.9438364
1_9534037	+	T	0.422523	yes	AT1G27450	APT1	AT1G27450.4,AT1G27450.1,AT1G27450.2,AT1G27450.3	3UTR,3UTR,3UTR,3UTR	0.7484,0.6877,0.7484,0.9828	355.3565652,24.4484943,1.9985924,0.9438364
1_9640059	+	T	0.639278	yes	AT1G27695	AT1G27695	AT1G27695.1,AT1G27695.2	3UTR,3UTR	0.2786,0.3784	12.7383595,0.1575299
1_9640063	+	T	0.221106	no	AT1G27695	AT1G27695	AT1G27695.1,AT1G27695.2	3UTR,3UTR	0.2985,0.4054	12.7383595,0.1575299
1_9640064	+	A	2.45926	yes	AT1G27695	AT1G27695	AT1G27695.1,AT1G27695.2	3UTR,3UTR	0.3035,0.4122	12.7383595,0.1575299
1_9640065	+	T	0.431623	no	AT1G27695	AT1G27695	AT1G27695.1,AT1G27695.2	3UTR,3UTR	0.3085,0.4189	12.7383595,0.1575299
1_9640069	+	T	1.01425	no	AT1G27695	AT1G27695	AT1G27695.1,AT1G27695.2	3UTR,3UTR	0.3284,0.4459	12.7383595,0.1575299
1_9640070	+	C	1.10499	yes	AT1G27695	AT1G27695	AT1G27695.1,AT1G27695.2	3UTR,3UTR	0.3333,0.4527	12.7383595,0.1575299
1_9742065	+	C	1.34423	yes	AT1G27950	LTPG1	AT1G27950.1	3UTR	0.4371	199.1303235
1_9742079	+	T	1.79387	no	AT1G27950	LTPG1	AT1G27950.1	3UTR	0.521	199.1303235
1_9742080	+	T	3.70468	no	AT1G27950	LTPG1	AT1G27950.1	3UTR	0.5269	199.1303235
1_9742081	+	G	6.75653	yes	AT1G27950	LTPG1	AT1G27950.1	3UTR	0.5329	199.1303235
1_9747764	+	T	5.7329	yes	AT1G27970	NTF2	AT1G27970.1,AT1G27970.2	CDS,CDS	0.6892,0.8793	114.1364755,4.7674796
1_9747878	+	G	1.79686	no	AT1G27970	NTF2	AT1G27970.1	3UTR	0.2459	114.1364755
1_9747879	+	T	3.96206	yes	AT1G27970	NTF2	AT1G27970.1	3UTR	0.2486	114.1364755
1_9747891	+	G	2.12136	yes	AT1G27970	NTF2	AT1G27970.1	3UTR	0.2814	114.1364755
1_9747895	+	T	5.62788	yes	AT1G27970	NTF2	AT1G27970.1	3UTR	0.2923	114.1364755
1_9747952	+	T	0.468095	yes	AT1G27970	NTF2	AT1G27970.1	3UTR	0.4481	114.1364755
1_9747957	+	T	1.64209	yes	AT1G27970	NTF2	AT1G27970.1	3UTR	0.4617	114.1364755
1_9747959	+	T	1.80202	no	AT1G27970	NTF2	AT1G27970.1	3UTR	0.4672	114.1364755
1_9747960	+	C	2.30931	no	AT1G27970	NTF2	AT1G27970.1	3UTR	0.4699	114.1364755
1_9747961	+	A	1.15199	no	AT1G27970	NTF2	AT1G27970.1	3UTR	0.4727	114.1364755
1_9747962	+	T	3.4729	yes	AT1G27970	NTF2	AT1G27970.1	3UTR	0.4754	114.1364755
1_9747967	+	A	1.58109	yes	AT1G27970	NTF2	AT1G27970.1	3UTR	0.4891	114.1364755
1_9747970	+	T	2.56754	yes	AT1G27970	NTF2	AT1G27970.1	3UTR	0.4973	114.1364755
1_9747971	+	A	1.69512	no	AT1G27970	NTF2	AT1G27970.1	3UTR	0.5	114.1364755
1_9747972	+	T	1.24752	no	AT1G27970	NTF2	AT1G27970.1	3UTR	0.5027	114.1364755
1_9747977	+	T	3.6829	no	AT1G27970	NTF2	AT1G27970.1	3UTR	0.5164	114.1364755
1_9747978	+	T	8.55102	yes	AT1G27970	NTF2	AT1G27970.1	3UTR	0.5191	114.1364755
1_9875445	+	T	1.46462	yes	AT1G28250	AT1G28250	AT1G28250.1	3UTR	0.6675	30.6159505
1_10151190	+	T	8.63796	yes	AT1G29070	RPL34	AT1G29070.1	3UTR	0.1355	413.0095957
1_10151191	+	T	1.29344	no	AT1G29070	RPL34	AT1G29070.1	3UTR	0.1394	413.0095957
1_10151192	+	T	2.21973	no	AT1G29070	RPL34	AT1G29070.1	3UTR	0.1434	413.0095957
1_10151199	+	C	18.6115	yes	AT1G29070	RPL34	AT1G29070.1	3UTR	0.1713	413.0095957
1_10151200	+	T	6.24598	no	AT1G29070	RPL34	AT1G29070.1	3UTR	0.1753	413.0095957
1_10151201	+	T	0.728901	no	AT1G29070	RPL34	AT1G29070.1	3UTR	0.1793	413.0095957
1_10151203	+	T	3.72322	no	AT1G29070	RPL34	AT1G29070.1	3UTR	0.1873	413.0095957
1_10151204	+	T	4.5385	no	AT1G29070	RPL34	AT1G29070.1	3UTR	0.1912	413.0095957
1_10151205	+	T	9.73732	no	AT1G29070	RPL34	AT1G29070.1	3UTR	0.1952	413.0095957
1_10151206	+	T	11.4856	yes	AT1G29070	RPL34	AT1G29070.1	3UTR	0.1992	413.0095957
1_10151207	+	C	5.16594	no	AT1G29070	RPL34	AT1G29070.1	3UTR	0.2032	413.0095957
1_10151249	+	T	2.83686	yes	AT1G29070	RPL34	AT1G29070.1	3UTR	0.3705	413.0095957
1_10151258	+	T	2.47489	yes	AT1G29070	RPL34	AT1G29070.1	3UTR	0.4064	413.0095957
1_10151260	+	A	0.953534	yes	AT1G29070	RPL34	AT1G29070.1	3UTR	0.4143	413.0095957
1_10151320	+	T	4.65437	no	AT1G29070	RPL34	AT1G29070.1	3UTR	0.6534	413.0095957
1_10151321	+	A	6.18836	yes	AT1G29070	RPL34	AT1G29070.1	3UTR	0.6574	413.0095957
1_10182558	+	A	1.55415	yes	AT1G29150	RPN6	AT1G29150.1,AT1G29150.2	3UTR,3UTR	0.2014,0.1883	93.3863775,0.0881403
1_10182591	+	C	1.784	no	AT1G29150	RPN6	AT1G29150.1,AT1G29150.2	3UTR,3UTR	0.316,0.2955	93.3863775,0.0881403
1_10182592	+	A	2.39942	yes	AT1G29150	RPN6	AT1G29150.1,AT1G29150.2	3UTR,3UTR	0.3194,0.2987	93.3863775,0.0881403
1_10182619	+	G	0.577206	yes	AT1G29150	RPN6	AT1G29150.1,AT1G29150.2	3UTR,3UTR	0.4132,0.3864	93.3863775,0.0881403
1_10449649	+	G	0.0982738	yes	AT1G29850	AT1G29850	AT1G29850.1,AT1G29850.2,AT1G29850.3	3UTR,3UTR,CDS	0.0533,0.0571,0.5484	28.8660885,23.6292536,0.1793296
1_10449733	+	T	2.76356	no	AT1G29850	AT1G29850	AT1G29850.1,AT1G29850.2,AT1G29850.3	3UTR,3UTR,3UTR	0.3018,0.3238,0.1614	28.8660885,23.6292536,0.1793296
1_10449734	+	T	3.4267	no	AT1G29850	AT1G29850	AT1G29850.1,AT1G29850.2,AT1G29850.3	3UTR,3UTR,3UTR	0.3047,0.327,0.1654	28.8660885,23.6292536,0.1793296
1_10449735	+	T	6.9561	no	AT1G29850	AT1G29850	AT1G29850.1,AT1G29850.2,AT1G29850.3	3UTR,3UTR,3UTR	0.3077,0.3302,0.1693	28.8660885,23.6292536,0.1793296
1_10449736	+	A	9.12032	yes	AT1G29850	AT1G29850	AT1G29850.1,AT1G29850.2,AT1G29850.3	3UTR,3UTR,3UTR	0.3107,0.3333,0.1732	28.8660885,23.6292536,0.1793296
1_10449737	+	T	7.71357	no	AT1G29850	AT1G29850	AT1G29850.1,AT1G29850.2,AT1G29850.3	3UTR,3UTR,3UTR	0.3136,0.3365,0.1772	28.8660885,23.6292536,0.1793296
1_10449746	+	A	1.0103	no	AT1G29850	AT1G29850	AT1G29850.1,AT1G29850.2,AT1G29850.3	3UTR,3UTR,3UTR	0.3402,0.3651,0.2126	28.8660885,23.6292536,0.1793296
1_10449747	+	A	0.51921	no	AT1G29850	AT1G29850	AT1G29850.1,AT1G29850.2,AT1G29850.3	3UTR,3UTR,3UTR	0.3432,0.3683,0.2165	28.8660885,23.6292536,0.1793296
1_10449748	+	T	0.815832	no	AT1G29850	AT1G29850	AT1G29850.1,AT1G29850.2,AT1G29850.3	3UTR,3UTR,3UTR	0.3462,0.3714,0.2205	28.8660885,23.6292536,0.1793296
1_10449749	+	C	3.80199	no	AT1G29850	AT1G29850	AT1G29850.1,AT1G29850.2,AT1G29850.3	3UTR,3UTR,3UTR	0.3491,0.3746,0.2244	28.8660885,23.6292536,0.1793296
1_10449750	+	T	13.0108	yes	AT1G29850	AT1G29850	AT1G29850.1,AT1G29850.2,AT1G29850.3	3UTR,3UTR,3UTR	0.3521,0.3778,0.2283	28.8660885,23.6292536,0.1793296
1_10449751	+	T	2.81979	no	AT1G29850	AT1G29850	AT1G29850.1,AT1G29850.2,AT1G29850.3	3UTR,3UTR,3UTR	0.355,0.381,0.2323	28.8660885,23.6292536,0.1793296
1_10449755	+	T	5.15893	yes	AT1G29850	AT1G29850	AT1G29850.1,AT1G29850.2,AT1G29850.3	3UTR,3UTR,3UTR	0.3669,0.3937,0.248	28.8660885,23.6292536,0.1793296
1_10478896	+	C	2.87204	no	AT1G29930	LHCB1.3	AT1G29930.1	3UTR	0.0879	15488.014423
1_10478897	+	T	5.03796	yes	AT1G29930	LHCB1.3	AT1G29930.1	3UTR	0.0921	15488.014423
1_10478898	+	T	0.910195	no	AT1G29930	LHCB1.3	AT1G29930.1	3UTR	0.0962	15488.014423
1_10478899	+	C	0.369741	no	AT1G29930	LHCB1.3	AT1G29930.1	3UTR	0.1004	15488.014423
1_10478901	+	G	3.78878	yes	AT1G29930	LHCB1.3	AT1G29930.1	3UTR	0.1088	15488.014423
1_10478903	+	C	0.40741	yes	AT1G29930	LHCB1.3	AT1G29930.1	3UTR	0.1172	15488.014423
1_10478905	+	T	2.56693	yes	AT1G29930	LHCB1.3	AT1G29930.1	3UTR	0.1255	15488.014423
1_10478910	+	T	1.95809	yes	AT1G29930	LHCB1.3	AT1G29930.1	3UTR	0.1464	15488.014423
1_10478960	+	G	4.87745	yes	AT1G29930	LHCB1.3	AT1G29930.1	3UTR	0.3556	15488.014423
1_10478973	+	T	9.55831	yes	AT1G29930	LHCB1.3	AT1G29930.1	3UTR	0.41	15488.014423
1_10478974	+	T	4.70949	no	AT1G29930	LHCB1.3	AT1G29930.1	3UTR	0.4142	15488.014423
1_10508922	+	A	0.504988	yes	AT1G29990	PFD6	AT1G29990.1	3UTR	0.304	67.3903268
1_10508963	+	T	2.10153	yes	AT1G29990	PFD6	AT1G29990.1	3UTR	0.4286	67.3903268
1_10508997	+	A	0.975433	yes	AT1G29990	PFD6	AT1G29990.1	3UTR	0.5319	67.3903268
1_10640584	+	T	4.89544	yes	AT1G30230	AT1G30230	AT1G30230.1,AT1G30230.2	3UTR,CDS	0.16,0.7976	456.4099494,0.4946014
1_10640589	+	A	2.38962	yes	AT1G30230	AT1G30230	AT1G30230.1,AT1G30230.2	3UTR,CDS	0.1718,0.8571	456.4099494,0.4946014
1_10640590	+	A	2.18595	no	AT1G30230	AT1G30230	AT1G30230.1,AT1G30230.2	3UTR,CDS	0.1741,0.869	456.4099494,0.4946014
1_10640592	+	T	0.880275	no	AT1G30230	AT1G30230	AT1G30230.1,AT1G30230.2	3UTR,CDS	0.1788,0.8929	456.4099494,0.4946014
1_10640593	+	T	2.54779	yes	AT1G30230	AT1G30230	AT1G30230.1,AT1G30230.2	3UTR,CDS	0.1812,0.9048	456.4099494,0.4946014
1_10640608	+	T	13.0905	yes	AT1G30230	AT1G30230	AT1G30230.1,AT1G30230.2	3UTR,3UTR	0.2165,0.0333	456.4099494,0.4946014
1_10640609	+	T	9.26615	no	AT1G30230	AT1G30230	AT1G30230.1,AT1G30230.2	3UTR,3UTR	0.2188,0.0389	456.4099494,0.4946014
1_10640612	+	G	2.87274	yes	AT1G30230	AT1G30230	AT1G30230.1,AT1G30230.2	3UTR,3UTR	0.2259,0.0556	456.4099494,0.4946014
1_10640618	+	G	7.58517	yes	AT1G30230	AT1G30230	AT1G30230.1,AT1G30230.2	3UTR,3UTR	0.24,0.0889	456.4099494,0.4946014
1_10640619	+	T	0.896612	no	AT1G30230	AT1G30230	AT1G30230.1,AT1G30230.2	3UTR,3UTR	0.2424,0.0944	456.4099494,0.4946014
1_10640626	+	C	1.07311	yes	AT1G30230	AT1G30230	AT1G30230.1,AT1G30230.2	3UTR,3UTR	0.2588,0.1333	456.4099494,0.4946014
1_10640639	+	T	3.2699	no	AT1G30230	AT1G30230	AT1G30230.1,AT1G30230.2	3UTR,3UTR	0.2894,0.2056	456.4099494,0.4946014
1_10640640	+	C	2.0741	no	AT1G30230	AT1G30230	AT1G30230.1,AT1G30230.2	3UTR,3UTR	0.2918,0.2111	456.4099494,0.4946014
1_10640641	+	C	0.914636	no	AT1G30230	AT1G30230	AT1G30230.1,AT1G30230.2	3UTR,3UTR	0.2941,0.2167	456.4099494,0.4946014
1_10640642	+	A	1.05529	no	AT1G30230	AT1G30230	AT1G30230.1,AT1G30230.2	3UTR,3UTR	0.2965,0.2222	456.4099494,0.4946014
1_10640643	+	T	4.43816	yes	AT1G30230	AT1G30230	AT1G30230.1,AT1G30230.2	3UTR,3UTR	0.2988,0.2278	456.4099494,0.4946014
1_10640645	+	T	8.55212	yes	AT1G30230	AT1G30230	AT1G30230.1,AT1G30230.2	3UTR,3UTR	0.3035,0.2389	456.4099494,0.4946014
1_10640647	+	G	3.00057	no	AT1G30230	AT1G30230	AT1G30230.1,AT1G30230.2	3UTR,3UTR	0.3082,0.25	456.4099494,0.4946014
1_10640648	+	A	15.1927	no	AT1G30230	AT1G30230	AT1G30230.1,AT1G30230.2	3UTR,3UTR	0.3106,0.2556	456.4099494,0.4946014
1_10640649	+	T	8.82463	no	AT1G30230	AT1G30230	AT1G30230.1,AT1G30230.2	3UTR,3UTR	0.3129,0.2611	456.4099494,0.4946014
1_10640650	+	A	0.802171	no	AT1G30230	AT1G30230	AT1G30230.1,AT1G30230.2	3UTR,3UTR	0.3153,0.2667	456.4099494,0.4946014
1_10640651	+	T	8.86511	no	AT1G30230	AT1G30230	AT1G30230.1,AT1G30230.2	3UTR,3UTR	0.3176,0.2722	456.4099494,0.4946014
1_10640652	+	T	17.8849	yes	AT1G30230	AT1G30230	AT1G30230.1,AT1G30230.2	3UTR,3UTR	0.32,0.2778	456.4099494,0.4946014
1_10640657	+	G	1.44873	yes	AT1G30230	AT1G30230	AT1G30230.1,AT1G30230.2	3UTR,3UTR	0.3318,0.3056	456.4099494,0.4946014
1_10723029	+	T	1.05753	yes	AT1G30380	PSAK	AT1G30380.1	3UTR	0.0644	2005.2918203
1_10723045	+	A	2.65365	yes	AT1G30380	PSAK	AT1G30380.1	3UTR	0.133	2005.2918203
1_10723055	+	T	5.5708	no	AT1G30380	PSAK	AT1G30380.1	3UTR	0.176	2005.2918203
1_10723056	+	T	10.2107	no	AT1G30380	PSAK	AT1G30380.1	3UTR	0.1803	2005.2918203
1_10723057	+	T	6.92952	no	AT1G30380	PSAK	AT1G30380.1	3UTR	0.1845	2005.2918203
1_10723058	+	T	23.2129	yes	AT1G30380	PSAK	AT1G30380.1	3UTR	0.1888	2005.2918203
1_10723059	+	T	3.49126	no	AT1G30380	PSAK	AT1G30380.1	3UTR	0.1931	2005.2918203
1_10723060	+	A	5.08807	no	AT1G30380	PSAK	AT1G30380.1	3UTR	0.1974	2005.2918203
1_10723066	+	A	5.7723	no	AT1G30380	PSAK	AT1G30380.1	3UTR	0.2232	2005.2918203
1_10723067	+	T	8.50102	yes	AT1G30380	PSAK	AT1G30380.1	3UTR	0.2275	2005.2918203
1_10723068	+	A	5.76217	no	AT1G30380	PSAK	AT1G30380.1	3UTR	0.2318	2005.2918203
1_10723072	+	T	0.188859	yes	AT1G30380	PSAK	AT1G30380.1	3UTR	0.2489	2005.2918203
1_10723074	+	A	0.17361	yes	AT1G30380	PSAK	AT1G30380.1	3UTR	0.2575	2005.2918203
1_10723081	+	T	2.26189	no	AT1G30380	PSAK	AT1G30380.1	3UTR	0.2876	2005.2918203
1_10723082	+	G	20.6086	yes	AT1G30380	PSAK	AT1G30380.1	3UTR	0.2918	2005.2918203
1_10723083	+	A	0.602939	no	AT1G30380	PSAK	AT1G30380.1	3UTR	0.2961	2005.2918203
1_10723090	+	T	0.694282	no	AT1G30380	PSAK	AT1G30380.1	3UTR	0.3262	2005.2918203
1_10723091	+	C	5.42064	yes	AT1G30380	PSAK	AT1G30380.1	3UTR	0.3305	2005.2918203
1_10723101	+	T	1.50794	yes	AT1G30380	PSAK	AT1G30380.1	3UTR	0.3734	2005.2918203
1_10737736	+	T	2.25967	yes	AT1G30400	ABCC1	AT1G30400.1,AT1G30400.2	3UTR,3UTR	0.0964,0.1064	53.6960514,2.6026722
1_10737747	+	T	1.09275	yes	AT1G30400	ABCC1	AT1G30400.1,AT1G30400.2	3UTR,3UTR	0.1244,0.1373	53.6960514,2.6026722
1_10737758	+	T	0.379741	yes	AT1G30400	ABCC1	AT1G30400.1,AT1G30400.2	3UTR,3UTR	0.1523,0.1681	53.6960514,2.6026722
1_10737774	+	T	0.0991416	no	AT1G30400	ABCC1	AT1G30400.1,AT1G30400.2	3UTR,3UTR	0.1929,0.2129	53.6960514,2.6026722
1_10737775	+	A	1.94582	yes	AT1G30400	ABCC1	AT1G30400.1,AT1G30400.2	3UTR,3UTR	0.1954,0.2157	53.6960514,2.6026722
1_11134330	+	C	3.84369	no	AT1G31170	SRX	AT1G31170.2,AT1G31170.1,AT1G31170.3	3UTR,3UTR,3UTR	0.4259,0.1052,0.2347	24.2924858,2.3523824,0.7127502
1_11134331	+	T	6.5844	yes	AT1G31170	SRX	AT1G31170.2,AT1G31170.1,AT1G31170.3	3UTR,3UTR,3UTR	0.4444,0.1062,0.2449	24.2924858,2.3523824,0.7127502
1_11134364	+	C	3.90497	yes	AT1G31170	SRX	AT1G31170.1,AT1G31170.5,AT1G31170.3,AT1G31170.4	3UTR,CDS,3UTR,CDS	0.1406,0.4583,0.5816,0.55	2.3523824,1.3428961,0.7127502,0
1_11196084	+	A	0.678487	yes	AT1G31300	AT1G31300	AT1G31300.1,AT1G31300.2,AT1G31300.3	3UTR,3UTR,3UTR	0.2902,0.2902,0.3596	14.4105212,5.365774,0.5022587
1_11253819	+	T	3.06427	yes	AT1G31420	FEI1	AT1G31420.2,AT1G31420.1,AT1G31420.3	3UTR,3UTR,3UTR	0.7588,0.8343,0.7588	24.5427184,24.0236776,0.5479243
1_11253820	+	G	0.541418	no	AT1G31420	FEI1	AT1G31420.2,AT1G31420.1,AT1G31420.3	3UTR,3UTR,3UTR	0.7613,0.837,0.7613	24.5427184,24.0236776,0.5479243
1_11253821	+	T	0.95532	no	AT1G31420	FEI1	AT1G31420.2,AT1G31420.1,AT1G31420.3	3UTR,3UTR,3UTR	0.7638,0.8398,0.7638	24.5427184,24.0236776,0.5479243
1_11461767	+	A	2.01659	yes	AT1G31910	AT1G31910	AT1G31910.2,AT1G31910.1	3UTR,3UTR	0.8676,0.0521	70.3323409,15.1572089
1_11461776	+	A	7.64998	yes	AT1G31910	AT1G31910	AT1G31910.2,AT1G31910.1	3UTR,3UTR	0.8881,0.0561	70.3323409,15.1572089
1_11461779	+	C	2.09508	yes	AT1G31910	AT1G31910	AT1G31910.2,AT1G31910.1	3UTR,3UTR	0.895,0.0574	70.3323409,15.1572089
1_11461780	+	T	0.52991	no	AT1G31910	AT1G31910	AT1G31910.2,AT1G31910.1	3UTR,3UTR	0.8973,0.0579	70.3323409,15.1572089
1_11482776	+	T	0.871167	yes	AT1G31970	RH5	AT1G31970.1	3UTR	0.3736	50.8147516
1_11531084	+	G	4.7977	yes	AT1G32050	SCAMP4	AT1G32050.1	3UTR	0.2907	119.8424735
1_11531165	+	T	2.90694	yes	AT1G32050	SCAMP4	AT1G32050.1	3UTR	0.5067	119.8424735
1_11531211	+	T	1.69096	no	AT1G32050	SCAMP4	AT1G32050.1	3UTR	0.6293	119.8424735
1_11531212	+	T	1.41832	no	AT1G32050	SCAMP4	AT1G32050.1	3UTR	0.632	119.8424735
1_11531213	+	T	0.353571	no	AT1G32050	SCAMP4	AT1G32050.1	3UTR	0.6347	119.8424735
1_11531214	+	T	0.15771	no	AT1G32050	SCAMP4	AT1G32050.1	3UTR	0.6373	119.8424735
1_11531215	+	T	0.545299	no	AT1G32050	SCAMP4	AT1G32050.1	3UTR	0.64	119.8424735
1_11531216	+	T	2.39804	yes	AT1G32050	SCAMP4	AT1G32050.1	3UTR	0.6427	119.8424735
1_11534484	+	T	0.409338	yes	AT1G32060	PRK	AT1G32060.1	3UTR	0.3319	309.6288442
1_11534495	+	T	1.53126	no	AT1G32060	PRK	AT1G32060.1	3UTR	0.3793	309.6288442
1_11534496	+	T	4.73446	yes	AT1G32060	PRK	AT1G32060.1	3UTR	0.3836	309.6288442
1_11534559	+	A	1.5639	yes	AT1G32060	PRK	AT1G32060.1	3UTR	0.6552	309.6288442
1_11534560	+	G	0.648303	no	AT1G32060	PRK	AT1G32060.1	3UTR	0.6595	309.6288442
1_11616110	+	T	3.83667	yes	AT1G32230	RCD1	AT1G32230.1,AT1G32230.2,AT1G32230.3,AT1G32230.5,AT1G32230.6,AT1G32230.4	3UTR,3UTR,3UTR,3UTR,3UTR,3UTR	0.6656,0.6656,0.7697,0.6656,0.1411,0.6656	38.6098196,28.8344206,1.194696,0.6480859,0.1517394,0.0952584
1_11616112	+	T	0.129237	no	AT1G32230	RCD1	AT1G32230.1,AT1G32230.2,AT1G32230.3,AT1G32230.5,AT1G32230.6,AT1G32230.4	3UTR,3UTR,3UTR,3UTR,3UTR,3UTR	0.6718,0.6718,0.774,0.6718,0.1424,0.6718	38.6098196,28.8344206,1.194696,0.6480859,0.1517394,0.0952584
1_11616113	+	T	2.93233	yes	AT1G32230	RCD1	AT1G32230.1,AT1G32230.2,AT1G32230.3,AT1G32230.5,AT1G32230.6,AT1G32230.4	3UTR,3UTR,3UTR,3UTR,3UTR,3UTR	0.6749,0.6749,0.7761,0.6749,0.143,0.6749	38.6098196,28.8344206,1.194696,0.6480859,0.1517394,0.0952584
1_11616149	+	G	0.567585	yes	AT1G32230	RCD1	AT1G32230.1,AT1G32230.2,AT1G32230.3,AT1G32230.5,AT1G32230.6,AT1G32230.4	3UTR,3UTR,3UTR,3UTR,3UTR,3UTR	0.7864,0.7864,0.8529,0.7864,0.1667,0.7864	38.6098196,28.8344206,1.194696,0.6480859,0.1517394,0.0952584
1_11654636	+	C	0.639277	yes	AT1G32310	AT1G32310	AT1G32310.1	3UTR	0.3299	20.5377883
1_11715014	+	C	0.791491	yes	AT1G32440	PKP3	AT1G32440.1	3UTR	0.2525	27.9857872
1_11715033	+	A	0.753988	no	AT1G32440	PKP3	AT1G32440.1	3UTR	0.3485	27.9857872
1_11715034	+	T	1.97793	no	AT1G32440	PKP3	AT1G32440.1	3UTR	0.3535	27.9857872
1_11715035	+	A	1.35918	no	AT1G32440	PKP3	AT1G32440.1	3UTR	0.3586	27.9857872
1_11715036	+	T	0.860069	no	AT1G32440	PKP3	AT1G32440.1	3UTR	0.3636	27.9857872
1_11715037	+	T	3.08261	no	AT1G32440	PKP3	AT1G32440.1	3UTR	0.3687	27.9857872
1_11715038	+	T	4.5105	no	AT1G32440	PKP3	AT1G32440.1	3UTR	0.3737	27.9857872
1_11715039	+	T	10.4988	yes	AT1G32440	PKP3	AT1G32440.1	3UTR	0.3788	27.9857872
1_11715040	+	T	2.22548	no	AT1G32440	PKP3	AT1G32440.1	3UTR	0.3838	27.9857872
1_11739216	+	T	3.09154	yes	AT1G32460	AT1G32460	AT1G32460.1	3UTR	0.4149	146.6610871
1_11739217	+	A	0.38138	no	AT1G32460	AT1G32460	AT1G32460.1	3UTR	0.4202	146.6610871
1_11739220	+	T	1.3217	yes	AT1G32460	AT1G32460	AT1G32460.1	3UTR	0.4362	146.6610871
1_11739227	+	G	0.42753	no	AT1G32460	AT1G32460	AT1G32460.1	3UTR	0.4734	146.6610871
1_11739228	+	T	0.292314	no	AT1G32460	AT1G32460	AT1G32460.1	3UTR	0.4787	146.6610871
1_11739229	+	T	2.732	no	AT1G32460	AT1G32460	AT1G32460.1	3UTR	0.484	146.6610871
1_11739230	+	T	4.53844	yes	AT1G32460	AT1G32460	AT1G32460.1	3UTR	0.4894	146.6610871
1_11957180	+	T	1.53894	no	AT1G32990	RPL11	AT1G32990.1	3UTR	0.1527	252.3838975
1_11957181	+	T	3.54566	yes	AT1G32990	RPL11	AT1G32990.1	3UTR	0.1565	252.3838975
1_11957190	+	A	0.404933	yes	AT1G32990	RPL11	AT1G32990.1	3UTR	0.1908	252.3838975
1_11957194	+	T	1.63832	no	AT1G32990	RPL11	AT1G32990.1	3UTR	0.2061	252.3838975
1_11957195	+	T	0.788595	no	AT1G32990	RPL11	AT1G32990.1	3UTR	0.2099	252.3838975
1_11957196	+	C	3.72435	yes	AT1G32990	RPL11	AT1G32990.1	3UTR	0.2137	252.3838975
1_11957197	+	C	0.0888635	no	AT1G32990	RPL11	AT1G32990.1	3UTR	0.2176	252.3838975
1_11957200	+	C	3.58007	yes	AT1G32990	RPL11	AT1G32990.1	3UTR	0.229	252.3838975
1_11957273	+	T	2.10077	yes	AT1G32990	RPL11	AT1G32990.1	3UTR	0.5076	252.3838975
1_11967747	+	C	0.691445	yes	AT1G33040	NACA5	AT1G33040.1	3UTR	0.3425	122.074053
1_11967787	+	C	0.678488	yes	AT1G33040	NACA5	AT1G33040.1	3UTR	0.6164	122.074053
1_12012276	+	T	1.1311	no	AT1G33120	RPL9B	AT1G33120.1	3UTR	0.161	597.5608823
1_12012277	+	T	2.97395	yes	AT1G33120	RPL9B	AT1G33120.1	3UTR	0.1641	597.5608823
1_12012295	+	C	0.199939	yes	AT1G33120	RPL9B	AT1G33120.1	3UTR	0.2198	597.5608823
1_12012297	+	A	3.29937	yes	AT1G33120	RPL9B	AT1G33120.1	3UTR	0.226	597.5608823
1_12012304	+	A	1.65247	yes	AT1G33120	RPL9B	AT1G33120.1	3UTR	0.2477	597.5608823
1_12012307	+	T	1.65211	yes	AT1G33120	RPL9B	AT1G33120.1	3UTR	0.257	597.5608823
1_12012319	+	T	0.27497	yes	AT1G33120	RPL9B	AT1G33120.1	3UTR	0.2941	597.5608823
1_12012336	+	T	8.42727	no	AT1G33120	RPL9B	AT1G33120.1	3UTR	0.3467	597.5608823
1_12012337	+	T	14.8911	yes	AT1G33120	RPL9B	AT1G33120.1	3UTR	0.3498	597.5608823
1_12012345	+	T	8.3408	yes	AT1G33120	RPL9B	AT1G33120.1	3UTR	0.3746	597.5608823
1_12012357	+	T	1.83962	yes	AT1G33120	RPL9B	AT1G33120.1	3UTR	0.4118	597.5608823
1_12024552	+	T	0.813641	yes	AT1G33140	RPL9B	AT1G33140.1	3UTR	0.175	1001.4459038
1_12024557	+	T	13.3965	yes	AT1G33140	RPL9B	AT1G33140.1	3UTR	0.1929	1001.4459038
1_12024558	+	T	3.70634	no	AT1G33140	RPL9B	AT1G33140.1	3UTR	0.1964	1001.4459038
1_12024568	+	A	0.47428	yes	AT1G33140	RPL9B	AT1G33140.1	3UTR	0.2321	1001.4459038
1_12024571	+	C	0.648375	yes	AT1G33140	RPL9B	AT1G33140.1	3UTR	0.2429	1001.4459038
1_12024610	+	T	1.92879	yes	AT1G33140	RPL9B	AT1G33140.1	3UTR	0.3821	1001.4459038
1_12024626	+	T	17.0213	yes	AT1G33140	RPL9B	AT1G33140.1	3UTR	0.4393	1001.4459038
1_12024627	+	T	5.65327	no	AT1G33140	RPL9B	AT1G33140.1	3UTR	0.4429	1001.4459038
1_12024628	+	A	2.53689	no	AT1G33140	RPL9B	AT1G33140.1	3UTR	0.4464	1001.4459038
1_12024629	+	T	2.48249	no	AT1G33140	RPL9B	AT1G33140.1	3UTR	0.45	1001.4459038
1_12024630	+	T	4.00128	no	AT1G33140	RPL9B	AT1G33140.1	3UTR	0.4536	1001.4459038
1_12024631	+	T	6.30378	no	AT1G33140	RPL9B	AT1G33140.1	3UTR	0.4571	1001.4459038
1_12024632	+	A	14.0785	no	AT1G33140	RPL9B	AT1G33140.1	3UTR	0.4607	1001.4459038
1_12024633	+	C	2.61345	no	AT1G33140	RPL9B	AT1G33140.1	3UTR	0.4643	1001.4459038
1_12024634	+	T	0.0983652	no	AT1G33140	RPL9B	AT1G33140.1	3UTR	0.4679	1001.4459038
1_12024645	+	T	8.94836	yes	AT1G33140	RPL9B	AT1G33140.1	3UTR	0.5071	1001.4459038
1_12024646	+	T	7.1291	no	AT1G33140	RPL9B	AT1G33140.1	3UTR	0.5107	1001.4459038
1_12266730	+	T	0.868651	no	AT1G33810	AT1G33810	AT1G33810.1	3UTR	0.2803	121.0849206
1_12266731	+	T	1.22396	no	AT1G33810	AT1G33810	AT1G33810.1	3UTR	0.2841	121.0849206
1_12266732	+	T	0.231533	no	AT1G33810	AT1G33810	AT1G33810.1	3UTR	0.2879	121.0849206
1_12266733	+	G	1.36486	yes	AT1G33810	AT1G33810	AT1G33810.1	3UTR	0.2917	121.0849206
1_12266742	+	T	0.856692	no	AT1G33810	AT1G33810	AT1G33810.1	3UTR	0.3258	121.0849206
1_12266743	+	T	1.41501	no	AT1G33810	AT1G33810	AT1G33810.1	3UTR	0.3295	121.0849206
1_12266744	+	C	0.645348	no	AT1G33810	AT1G33810	AT1G33810.1	3UTR	0.3333	121.0849206
1_12266745	+	C	3.55081	yes	AT1G33810	AT1G33810	AT1G33810.1	3UTR	0.3371	121.0849206
1_12266746	+	T	0.014472	no	AT1G33810	AT1G33810	AT1G33810.1	3UTR	0.3409	121.0849206
1_12266750	+	T	5.20041	yes	AT1G33810	AT1G33810	AT1G33810.1	3UTR	0.3561	121.0849206
1_12357963	+	T	1.67875	no	AT1G33990	MES14	AT1G33990.1	3UTR	0.5	52.9749921
1_12357964	+	G	2.34529	yes	AT1G33990	MES14	AT1G33990.1	3UTR	0.5074	52.9749921
1_12357965	+	T	1.39635	no	AT1G33990	MES14	AT1G33990.1	3UTR	0.5147	52.9749921
1_12357971	+	A	0.603052	yes	AT1G33990	MES14	AT1G33990.1	3UTR	0.5588	52.9749921
1_12868590	+	C	1.36182	no	AT1G35160	GRF4	AT1G35160.1,AT1G35160.2	3UTR,3UTR	0.2022,0.2	164.2329671,0.2195642
1_12868591	+	T	2.54219	yes	AT1G35160	GRF4	AT1G35160.1,AT1G35160.2	3UTR,3UTR	0.2049,0.2027	164.2329671,0.2195642
1_12868597	+	T	0.520125	yes	AT1G35160	GRF4	AT1G35160.1,AT1G35160.2	3UTR,3UTR	0.221,0.2187	164.2329671,0.2195642
1_12868712	+	T	3.37031	no	AT1G35160	GRF4	AT1G35160.1,AT1G35160.2	3UTR,3UTR	0.531,0.5253	164.2329671,0.2195642
1_12868713	+	T	4.87049	yes	AT1G35160	GRF4	AT1G35160.1,AT1G35160.2	3UTR,3UTR	0.5337,0.528	164.2329671,0.2195642
1_13041939	+	T	8.98864	yes	AT1G35460	BHLH80	AT1G35460.1,AT1G35460.2	3UTR,3UTR	0.1235,0.2787	10.9851832,0.0892328
1_13041940	+	A	1.60418	no	AT1G35460	BHLH80	AT1G35460.1,AT1G35460.2	3UTR,3UTR	0.1275,0.282	10.9851832,0.0892328
1_13041941	+	T	0.385645	no	AT1G35460	BHLH80	AT1G35460.1,AT1G35460.2	3UTR,3UTR	0.1315,0.2852	10.9851832,0.0892328
1_13041956	+	A	0.129072	no	AT1G35460	BHLH80	AT1G35460.1,AT1G35460.2	3UTR,3UTR	0.1912,0.3344	10.9851832,0.0892328
1_13041957	+	A	1.64463	yes	AT1G35460	BHLH80	AT1G35460.1,AT1G35460.2	3UTR,3UTR	0.1952,0.3377	10.9851832,0.0892328
1_13210273	+	T	2.27706	no	AT1G35680	RPL21	AT1G35680.1	3UTR	0.1436	365.3100507
1_13210274	+	T	4.06656	yes	AT1G35680	RPL21	AT1G35680.1	3UTR	0.1492	365.3100507
1_13210316	+	T	4.01238	no	AT1G35680	RPL21	AT1G35680.1	3UTR	0.3812	365.3100507
1_13210317	+	T	2.58973	no	AT1G35680	RPL21	AT1G35680.1	3UTR	0.3867	365.3100507
1_13210318	+	C	4.05804	yes	AT1G35680	RPL21	AT1G35680.1	3UTR	0.3923	365.3100507
1_13210321	+	T	0.837833	yes	AT1G35680	RPL21	AT1G35680.1	3UTR	0.4088	365.3100507
1_13210334	+	C	0.203538	yes	AT1G35680	RPL21	AT1G35680.1	3UTR	0.4807	365.3100507
1_13210337	+	T	1.5146	no	AT1G35680	RPL21	AT1G35680.1	3UTR	0.4972	365.3100507
1_13210338	+	T	9.72195	yes	AT1G35680	RPL21	AT1G35680.1	3UTR	0.5028	365.3100507
1_13210339	+	T	6.24904	no	AT1G35680	RPL21	AT1G35680.1	3UTR	0.5083	365.3100507
1_13210340	+	A	1.24294	no	AT1G35680	RPL21	AT1G35680.1	3UTR	0.5138	365.3100507
1_13210341	+	T	4.58345	no	AT1G35680	RPL21	AT1G35680.1	3UTR	0.5193	365.3100507
1_13210342	+	T	7.81669	no	AT1G35680	RPL21	AT1G35680.1	3UTR	0.5249	365.3100507
1_13210343	+	A	7.44171	no	AT1G35680	RPL21	AT1G35680.1	3UTR	0.5304	365.3100507
1_13210344	+	A	3.2778	no	AT1G35680	RPL21	AT1G35680.1	3UTR	0.5359	365.3100507
1_13210361	+	T	3.73001	yes	AT1G35680	RPL21	AT1G35680.1	3UTR	0.6298	365.3100507
1_13453157	+	T	3.87781	yes	AT1G36050	AT1G36050	AT1G36050.2	3UTR	0.263	34.4428058
1_13453180	+	T	0.545887	yes	AT1G36050	AT1G36050	AT1G36050.2	3UTR	0.3229	34.4428058
1_13543897	+	T	0.205104	no	AT1G36160	ACC1	AT1G36160.2,AT1G36160.1	3UTR,3UTR	0.5104,0.5256	36.3957966,0.6687106
1_13543898	+	T	1.59141	yes	AT1G36160	ACC1	AT1G36160.2,AT1G36160.1	3UTR,3UTR	0.5145,0.5299	36.3957966,0.6687106
1_13543903	+	T	2.76407	yes	AT1G36160	ACC1	AT1G36160.2,AT1G36160.1	3UTR,3UTR	0.5353,0.5513	36.3957966,0.6687106
1_13673988	+	T	0.918518	yes	AT1G36320	AT1G36320	AT1G36320.1	3UTR	0.1811	40.2029807
1_14026810	+	C	1.97786	yes	AT1G36980	AT1G36980	AT1G36980.2,AT1G36980.1	3UTR,3UTR	0.2628,0.3677	147.8105185,0.4907771
1_14026877	+	G	1.39945	no	AT1G36980	AT1G36980	AT1G36980.2,AT1G36980.1	3UTR,3UTR	0.4776,0.6682	147.8105185,0.4907771
1_14026878	+	T	0.295332	no	AT1G36980	AT1G36980	AT1G36980.2,AT1G36980.1	3UTR,3UTR	0.4808,0.6726	147.8105185,0.4907771
1_14026879	+	T	3.17039	no	AT1G36980	AT1G36980	AT1G36980.2,AT1G36980.1	3UTR,3UTR	0.484,0.6771	147.8105185,0.4907771
1_14026880	+	A	0.467997	no	AT1G36980	AT1G36980	AT1G36980.2,AT1G36980.1	3UTR,3UTR	0.4872,0.6816	147.8105185,0.4907771
1_14026881	+	A	1.93828	no	AT1G36980	AT1G36980	AT1G36980.2,AT1G36980.1	3UTR,3UTR	0.4904,0.6861	147.8105185,0.4907771
1_14026882	+	A	0.543334	no	AT1G36980	AT1G36980	AT1G36980.2,AT1G36980.1	3UTR,3UTR	0.4936,0.6906	147.8105185,0.4907771
1_14026883	+	A	4.6781	yes	AT1G36980	AT1G36980	AT1G36980.2,AT1G36980.1	3UTR,3UTR	0.4968,0.6951	147.8105185,0.4907771
1_14026884	+	C	2.75346	no	AT1G36980	AT1G36980	AT1G36980.2,AT1G36980.1	3UTR,3UTR	0.5,0.6996	147.8105185,0.4907771
1_14026890	+	G	0.427387	no	AT1G36980	AT1G36980	AT1G36980.2,AT1G36980.1	3UTR,3UTR	0.5192,0.7265	147.8105185,0.4907771
1_14026891	+	T	1.08041	yes	AT1G36980	AT1G36980	AT1G36980.2,AT1G36980.1	3UTR,3UTR	0.5224,0.7309	147.8105185,0.4907771
1_14026898	+	T	2.96878	no	AT1G36980	AT1G36980	AT1G36980.2,AT1G36980.1	3UTR,3UTR	0.5449,0.7623	147.8105185,0.4907771
1_14026899	+	A	5.24485	yes	AT1G36980	AT1G36980	AT1G36980.2,AT1G36980.1	3UTR,3UTR	0.5481,0.7668	147.8105185,0.4907771
1_14026900	+	T	1.22193	no	AT1G36980	AT1G36980	AT1G36980.2,AT1G36980.1	3UTR,3UTR	0.5513,0.7713	147.8105185,0.4907771
1_14026902	+	G	1.48658	yes	AT1G36980	AT1G36980	AT1G36980.2,AT1G36980.1	3UTR,3UTR	0.5577,0.7803	147.8105185,0.4907771
1_16127159	+	T	0.441884	no	AT1G42960	AT1G42960	AT1G42960.1	3UTR	0.3594	226.3066718
1_16127160	+	A	0.838732	yes	AT1G42960	AT1G42960	AT1G42960.1	3UTR	0.3641	226.3066718
1_16127173	+	T	4.08753	no	AT1G42960	AT1G42960	AT1G42960.1	3UTR	0.424	226.3066718
1_16127174	+	T	11.9363	no	AT1G42960	AT1G42960	AT1G42960.1	3UTR	0.4286	226.3066718
1_16127175	+	T	15.2952	yes	AT1G42960	AT1G42960	AT1G42960.1	3UTR	0.4332	226.3066718
1_16127176	+	T	4.08763	no	AT1G42960	AT1G42960	AT1G42960.1	3UTR	0.4378	226.3066718
1_16127178	+	G	9.38873	yes	AT1G42960	AT1G42960	AT1G42960.1	3UTR	0.447	226.3066718
1_16127184	+	T	1.17635	no	AT1G42960	AT1G42960	AT1G42960.1	3UTR	0.4747	226.3066718
1_16127185	+	A	0.667648	no	AT1G42960	AT1G42960	AT1G42960.1	3UTR	0.4793	226.3066718
1_16127186	+	T	1.30152	yes	AT1G42960	AT1G42960	AT1G42960.1	3UTR	0.4839	226.3066718
1_16127188	+	T	0.412856	yes	AT1G42960	AT1G42960	AT1G42960.1	3UTR	0.4931	226.3066718
1_16129607	+	T	0.98581	no	AT1G42970	GAPB	AT1G42970.1	3UTR	0.071	631.8541631
1_16129608	+	A	3.10109	no	AT1G42970	GAPB	AT1G42970.1	3UTR	0.0742	631.8541631
1_16129609	+	T	4.42845	no	AT1G42970	GAPB	AT1G42970.1	3UTR	0.0774	631.8541631
1_16129610	+	T	6.7434	yes	AT1G42970	GAPB	AT1G42970.1	3UTR	0.0806	631.8541631
1_16129634	+	T	9.1383	yes	AT1G42970	GAPB	AT1G42970.1	3UTR	0.1581	631.8541631
1_16129635	+	C	3.14917	no	AT1G42970	GAPB	AT1G42970.1	3UTR	0.1613	631.8541631
1_16129641	+	T	1.65085	yes	AT1G42970	GAPB	AT1G42970.1	3UTR	0.1806	631.8541631
1_16129650	+	C	1.20102	no	AT1G42970	GAPB	AT1G42970.1	3UTR	0.2097	631.8541631
1_16129651	+	G	11.4682	yes	AT1G42970	GAPB	AT1G42970.1	3UTR	0.2129	631.8541631
1_16129653	+	A	1.80536	yes	AT1G42970	GAPB	AT1G42970.1	3UTR	0.2194	631.8541631
1_16129656	+	C	1.11256	no	AT1G42970	GAPB	AT1G42970.1	3UTR	0.229	631.8541631
1_16129657	+	G	4.14928	no	AT1G42970	GAPB	AT1G42970.1	3UTR	0.2323	631.8541631
1_16129658	+	T	10.9549	yes	AT1G42970	GAPB	AT1G42970.1	3UTR	0.2355	631.8541631
1_16129670	+	T	1.45406	yes	AT1G42970	GAPB	AT1G42970.1	3UTR	0.2742	631.8541631
1_16129701	+	G	2.12827	yes	AT1G42970	GAPB	AT1G42970.1	3UTR	0.3742	631.8541631
1_16268674	+	T	9.08583	yes	AT1G43170	ARP1	AT1G43170.8,AT1G43170.2,AT1G43170.3,AT1G43170.7,AT1G43170.1,AT1G43170.9,AT1G43170.5,AT1G43170.4,AT1G43170.6	3UTR,3UTR,3UTR,3UTR,3UTR,3UTR,3UTR,3UTR,3UTR	0.875,0.1765,0.1765,0.875,0.1342,0.875,0.875,0.1765,0.875	585.5392801,437.5628905,5.1698904,4.9720091,4.5121275,2.9115529,0.2430071,0.0824821,0.0662581
1_16268675	+	T	3.35986	no	AT1G43170	ARP1	AT1G43170.8,AT1G43170.2,AT1G43170.3,AT1G43170.7,AT1G43170.1,AT1G43170.9,AT1G43170.5,AT1G43170.4,AT1G43170.6	3UTR,3UTR,3UTR,3UTR,3UTR,3UTR,3UTR,3UTR,3UTR	0.8958,0.1807,0.1807,0.8958,0.1374,0.8958,0.8958,0.1807,0.8958	585.5392801,437.5628905,5.1698904,4.9720091,4.5121275,2.9115529,0.2430071,0.0824821,0.0662581
1_16268680	+	G	1.77514	yes	AT1G43170	ARP1	AT1G43170.8,AT1G43170.2,AT1G43170.3,AT1G43170.7,AT1G43170.1,AT1G43170.9,AT1G43170.5,AT1G43170.4,AT1G43170.6	3UTR,3UTR,3UTR,3UTR,3UTR,3UTR,3UTR,3UTR,3UTR	1,0.2017,0.2017,1,0.1534,1,1,0.2017,1	585.5392801,437.5628905,5.1698904,4.9720091,4.5121275,2.9115529,0.2430071,0.0824821,0.0662581
1_16268684	+	C	2.99048	yes	AT1G43170	ARP1	AT1G43170.2,AT1G43170.3,AT1G43170.1,AT1G43170.4	3UTR,3UTR,3UTR,3UTR	0.2185,0.2185,0.1661,0.2185	437.5628905,5.1698904,4.5121275,0.0824821
1_16268692	+	C	16.3156	yes	AT1G43170	ARP1	AT1G43170.2,AT1G43170.3,AT1G43170.1,AT1G43170.4	3UTR,3UTR,3UTR,3UTR	0.2521,0.2521,0.1917,0.2521	437.5628905,5.1698904,4.5121275,0.0824821
1_16268708	+	T	8.12125	yes	AT1G43170	ARP1	AT1G43170.2,AT1G43170.3,AT1G43170.1,AT1G43170.4	3UTR,3UTR,3UTR,3UTR	0.3193,0.3193,0.2428,0.3193	437.5628905,5.1698904,4.5121275,0.0824821
1_16268720	+	T	12.8001	yes	AT1G43170	ARP1	AT1G43170.2,AT1G43170.3,AT1G43170.1,AT1G43170.4	3UTR,3UTR,3UTR,3UTR	0.3697,0.3697,0.2812,0.3697	437.5628905,5.1698904,4.5121275,0.0824821
1_16268755	+	T	9.46632	no	AT1G43170	ARP1	AT1G43170.8,AT1G43170.2,AT1G43170.3,AT1G43170.7,AT1G43170.1,AT1G43170.9,AT1G43170.5,AT1G43170.4,AT1G43170.6	3UTR,3UTR,3UTR,3UTR,3UTR,3UTR,3UTR,3UTR,3UTR	0.0833,0.5168,0.5168,0.0833,0.393,0.0833,0.0833,0.5168,0.0833	585.5392801,437.5628905,5.1698904,4.9720091,4.5121275,2.9115529,0.2430071,0.0824821,0.0662581
1_16268756	+	T	17.8826	yes	AT1G43170	ARP1	AT1G43170.8,AT1G43170.2,AT1G43170.3,AT1G43170.7,AT1G43170.1,AT1G43170.9,AT1G43170.5,AT1G43170.4,AT1G43170.6	3UTR,3UTR,3UTR,3UTR,3UTR,3UTR,3UTR,3UTR,3UTR	0.0917,0.521,0.521,0.0917,0.3962,0.0917,0.0917,0.521,0.0917	585.5392801,437.5628905,5.1698904,4.9720091,4.5121275,2.9115529,0.2430071,0.0824821,0.0662581
1_16268767	+	A	4.88167	yes	AT1G43170	ARP1	AT1G43170.8,AT1G43170.2,AT1G43170.3,AT1G43170.7,AT1G43170.1,AT1G43170.9,AT1G43170.5,AT1G43170.4,AT1G43170.6	3UTR,3UTR,3UTR,3UTR,3UTR,3UTR,3UTR,3UTR,3UTR	0.1833,0.5672,0.5672,0.1833,0.4313,0.1833,0.1833,0.5672,0.1833	585.5392801,437.5628905,5.1698904,4.9720091,4.5121275,2.9115529,0.2430071,0.0824821,0.0662581
1_16268813	+	T	3.25342	yes	AT1G43170	ARP1	AT1G43170.8,AT1G43170.2,AT1G43170.3,AT1G43170.7,AT1G43170.1,AT1G43170.9,AT1G43170.5,AT1G43170.4,AT1G43170.6	3UTR,3UTR,3UTR,3UTR,3UTR,3UTR,3UTR,3UTR,3UTR	0.5667,0.7605,0.7605,0.5667,0.5783,0.5667,0.5667,0.7605,0.5667	585.5392801,437.5628905,5.1698904,4.9720091,4.5121275,2.9115529,0.2430071,0.0824821,0.0662581
1_16268815	+	T	1.43477	yes	AT1G43170	ARP1	AT1G43170.8,AT1G43170.2,AT1G43170.3,AT1G43170.7,AT1G43170.1,AT1G43170.9,AT1G43170.5,AT1G43170.4,AT1G43170.6	3UTR,3UTR,3UTR,3UTR,3UTR,3UTR,3UTR,3UTR,3UTR	0.5833,0.7689,0.7689,0.5833,0.5847,0.5833,0.5833,0.7689,0.5833	585.5392801,437.5628905,5.1698904,4.9720091,4.5121275,2.9115529,0.2430071,0.0824821,0.0662581
1_16470394	+	T	0.0833167	no	AT1G43670	AT1G43670	AT1G43670.1	3UTR	0.3026	56.7557185
1_16470395	+	C	3.22276	no	AT1G43670	AT1G43670	AT1G43670.1	3UTR	0.3092	56.7557185
1_16470396	+	T	2.62614	no	AT1G43670	AT1G43670	AT1G43670.1	3UTR	0.3158	56.7557185
1_16470397	+	A	10.0558	yes	AT1G43670	AT1G43670	AT1G43670.1	3UTR	0.3224	56.7557185
1_16470398	+	T	0.701398	no	AT1G43670	AT1G43670	AT1G43670.1	3UTR	0.3289	56.7557185
1_16470402	+	C	1.76625	yes	AT1G43670	AT1G43670	AT1G43670.1	3UTR	0.3553	56.7557185
1_16470409	+	T	1.62011	yes	AT1G43670	AT1G43670	AT1G43670.1	3UTR	0.4013	56.7557185
1_16470410	+	T	0.91008	no	AT1G43670	AT1G43670	AT1G43670.1	3UTR	0.4079	56.7557185
1_16470442	+	A	2.47543	yes	AT1G43670	AT1G43670	AT1G43670.1	3UTR	0.6184	56.7557185
1_16648419	+	A	0.504428	yes	AT1G43890	RABC1	AT1G43890.2,AT1G43890.1,AT1G43890.3	3UTR,3UTR,3UTR	0.1797,0.0947,0.1041	103.1654589,25.3951206,2.2183135
1_16648463	+	T	2.1155	yes	AT1G43890	RABC1	AT1G43890.2,AT1G43890.1,AT1G43890.3	3UTR,3UTR,3UTR	0.5234,0.2757,0.3032	103.1654589,25.3951206,2.2183135
1_16648568	+	T	1.32026	yes	AT1G43890	RABC1	AT1G43890.1,AT1G43890.3	3UTR,3UTR	0.7078,0.7783	25.3951206,2.2183135
1_16873211	+	T	11.9472	no	AT1G44575	PSBS	AT1G44575.1,AT1G44575.2,AT1G44575.3	3UTR,3UTR,3UTR	0.0699,0.7986,0.069	919.0436225,1.239784,0.1946258
1_16873212	+	T	19.383	yes	AT1G44575	PSBS	AT1G44575.1,AT1G44575.2,AT1G44575.3	3UTR,3UTR,3UTR	0.0742,0.7998,0.0733	919.0436225,1.239784,0.1946258
1_16873213	+	T	0.186159	no	AT1G44575	PSBS	AT1G44575.1,AT1G44575.2,AT1G44575.3	3UTR,3UTR,3UTR	0.0786,0.801,0.0776	919.0436225,1.239784,0.1946258
1_16873217	+	A	3.71219	yes	AT1G44575	PSBS	AT1G44575.1,AT1G44575.2,AT1G44575.3	3UTR,3UTR,3UTR	0.0961,0.8058,0.0948	919.0436225,1.239784,0.1946258
1_16873225	+	T	6.93214	yes	AT1G44575	PSBS	AT1G44575.1,AT1G44575.2,AT1G44575.3	3UTR,3UTR,3UTR	0.131,0.8154,0.1293	919.0436225,1.239784,0.1946258
1_16873227	+	T	1.61992	no	AT1G44575	PSBS	AT1G44575.1,AT1G44575.2,AT1G44575.3	3UTR,3UTR,3UTR	0.1397,0.8179,0.1379	919.0436225,1.239784,0.1946258
1_16873228	+	G	6.78675	yes	AT1G44575	PSBS	AT1G44575.1,AT1G44575.2,AT1G44575.3	3UTR,3UTR,3UTR	0.1441,0.8191,0.1422	919.0436225,1.239784,0.1946258
1_16873236	+	C	3.13972	no	AT1G44575	PSBS	AT1G44575.1,AT1G44575.2,AT1G44575.3	3UTR,3UTR,3UTR	0.179,0.8287,0.1767	919.0436225,1.239784,0.1946258
1_16873237	+	T	5.67092	no	AT1G44575	PSBS	AT1G44575.1,AT1G44575.2,AT1G44575.3	3UTR,3UTR,3UTR	0.1834,0.8299,0.181	919.0436225,1.239784,0.1946258
1_16873238	+	T	20.5991	yes	AT1G44575	PSBS	AT1G44575.1,AT1G44575.2,AT1G44575.3	3UTR,3UTR,3UTR	0.1878,0.8311,0.1853	919.0436225,1.239784,0.1946258
1_16873239	+	C	2.93056	no	AT1G44575	PSBS	AT1G44575.1,AT1G44575.2,AT1G44575.3	3UTR,3UTR,3UTR	0.1921,0.8323,0.1897	919.0436225,1.239784,0.1946258
1_16873240	+	A	8.74096	no	AT1G44575	PSBS	AT1G44575.1,AT1G44575.2,AT1G44575.3	3UTR,3UTR,3UTR	0.1965,0.8335,0.194	919.0436225,1.239784,0.1946258
1_16873241	+	T	4.86024	no	AT1G44575	PSBS	AT1G44575.1,AT1G44575.2,AT1G44575.3	3UTR,3UTR,3UTR	0.2009,0.8347,0.1983	919.0436225,1.239784,0.1946258
1_16873261	+	G	1.74538	yes	AT1G44575	PSBS	AT1G44575.1,AT1G44575.2,AT1G44575.3	3UTR,3UTR,3UTR	0.2882,0.8589,0.2845	919.0436225,1.239784,0.1946258
1_16873267	+	T	3.10121	no	AT1G44575	PSBS	AT1G44575.1,AT1G44575.2,AT1G44575.3	3UTR,3UTR,3UTR	0.3144,0.8661,0.3103	919.0436225,1.239784,0.1946258
1_16873268	+	T	4.36701	yes	AT1G44575	PSBS	AT1G44575.1,AT1G44575.2,AT1G44575.3	3UTR,3UTR,3UTR	0.3188,0.8673,0.3147	919.0436225,1.239784,0.1946258
1_16873270	+	A	1.90011	yes	AT1G44575	PSBS	AT1G44575.1,AT1G44575.2,AT1G44575.3	3UTR,3UTR,3UTR	0.3275,0.8697,0.3233	919.0436225,1.239784,0.1946258
1_16873277	+	G	10.447	yes	AT1G44575	PSBS	AT1G44575.1,AT1G44575.2,AT1G44575.3	3UTR,3UTR,3UTR	0.3581,0.8782,0.3534	919.0436225,1.239784,0.1946258
1_16873280	+	A	0.326752	no	AT1G44575	PSBS	AT1G44575.1,AT1G44575.2,AT1G44575.3	3UTR,3UTR,3UTR	0.3712,0.8818,0.3664	919.0436225,1.239784,0.1946258
1_16873281	+	T	4.81453	yes	AT1G44575	PSBS	AT1G44575.1,AT1G44575.2,AT1G44575.3	3UTR,3UTR,3UTR	0.3755,0.883,0.3707	919.0436225,1.239784,0.1946258
1_16873284	+	T	7.6988	yes	AT1G44575	PSBS	AT1G44575.1,AT1G44575.2,AT1G44575.3	3UTR,3UTR,3UTR	0.3886,0.8866,0.3836	919.0436225,1.239784,0.1946258
1_16873285	+	T	2.42431	no	AT1G44575	PSBS	AT1G44575.1,AT1G44575.2,AT1G44575.3	3UTR,3UTR,3UTR	0.393,0.8878,0.3879	919.0436225,1.239784,0.1946258
1_16873287	+	T	2.70049	yes	AT1G44575	PSBS	AT1G44575.1,AT1G44575.2,AT1G44575.3	3UTR,3UTR,3UTR	0.4017,0.8902,0.3966	919.0436225,1.239784,0.1946258
1_17180490	+	C	0.0600543	yes	AT1G45474	LHCA5	AT1G45474.1	3UTR	0.5556	44.9629559
1_17180714	+	T	1.54841	no	AT1G45474	LHCA5	AT1G45474.2	3UTR	0.1238	58.1826317
1_17180715	+	T	2.37617	yes	AT1G45474	LHCA5	AT1G45474.2	3UTR	0.1333	58.1826317
1_17180752	+	T	0.052708	yes	AT1G45474	LHCA5	AT1G45474.2	3UTR	0.4857	58.1826317
1_17180775	+	T	0.911373	yes	AT1G45474	LHCA5	AT1G45474.2	3UTR	0.7048	58.1826317
1_17180776	+	T	0.822724	no	AT1G45474	LHCA5	AT1G45474.2	3UTR	0.7143	58.1826317
1_17180778	+	T	2.21188	yes	AT1G45474	LHCA5	AT1G45474.2	3UTR	0.7333	58.1826317
1_17193127	+	G	0.872137	yes	AT1G45688	AT1G45688	AT1G45688.1,AT1G45688.2	3UTR,3UTR	0.5779,0.9553	91.8574556,1.3817764
1_17427325	+	A	1.00527	yes	AT1G47490	RBP47C	AT1G47490.1,AT1G47490.2	3UTR,3UTR	0.4863,0.6652	44.4263272,3.3996772
1_17454299	+	C	2.27433	yes	AT1G47530	AT1G47530	AT1G47530.1,AT1G47530.2	3UTR,3UTR	0.5371,0.6065	104.7411499,0.2097098
1_17808707	+	T	2.59795	yes	AT1G48230	AT1G48230	AT1G48230.1,AT1G48230.2	3UTR,3UTR	0.2629,0.3643	35.9573899,0.6926859
1_17868220	+	G	2.64411	no	AT1G48350	RPL18	AT1G48350.1	3UTR	0.0185	498.5348337
1_17868221	+	T	13.2591	yes	AT1G48350	RPL18	AT1G48350.1	3UTR	0.0231	498.5348337
1_17868222	+	T	7.68273	no	AT1G48350	RPL18	AT1G48350.1	3UTR	0.0278	498.5348337
1_17868224	+	T	1.19332	yes	AT1G48350	RPL18	AT1G48350.1	3UTR	0.037	498.5348337
1_17868235	+	T	7.98116	no	AT1G48350	RPL18	AT1G48350.1	3UTR	0.088	498.5348337
1_17868236	+	T	7.3776	no	AT1G48350	RPL18	AT1G48350.1	3UTR	0.0926	498.5348337
1_17868237	+	C	9.0102	yes	AT1G48350	RPL18	AT1G48350.1	3UTR	0.0972	498.5348337
1_17868238	+	T	6.17801	no	AT1G48350	RPL18	AT1G48350.1	3UTR	0.1019	498.5348337
1_17868255	+	T	0.881117	no	AT1G48350	RPL18	AT1G48350.1	3UTR	0.1806	498.5348337
1_17868256	+	G	5.1711	yes	AT1G48350	RPL18	AT1G48350.1	3UTR	0.1852	498.5348337
1_17868257	+	T	0.976199	no	AT1G48350	RPL18	AT1G48350.1	3UTR	0.1898	498.5348337
1_17908388	+	T	7.34344	yes	AT1G48440	AT1G48440	AT1G48440.1	3UTR	0.2913	156.4663817
1_17908398	+	T	1.1893	yes	AT1G48440	AT1G48440	AT1G48440.1	3UTR	0.3398	156.4663817
1_17908405	+	C	0.518282	yes	AT1G48440	AT1G48440	AT1G48440.1	3UTR	0.3738	156.4663817
1_17908409	+	T	1.57735	yes	AT1G48440	AT1G48440	AT1G48440.1	3UTR	0.3932	156.4663817
1_17908410	+	A	1.37343	no	AT1G48440	AT1G48440	AT1G48440.1	3UTR	0.3981	156.4663817
1_17908441	+	G	0.791516	yes	AT1G48440	AT1G48440	AT1G48440.1	3UTR	0.5485	156.4663817
1_17908452	+	T	1.03381	yes	AT1G48440	AT1G48440	AT1G48440.1	3UTR	0.6019	156.4663817
1_17908462	+	T	0.0362401	yes	AT1G48440	AT1G48440	AT1G48440.1	3UTR	0.6505	156.4663817
1_17908493	+	A	4.28153	yes	AT1G48440	AT1G48440	AT1G48440.1	3UTR	0.801	156.4663817
1_17969090	+	A	0.264875	yes	AT1G48600	NMT2	AT1G48600.1,AT1G48600.2	3UTR,3UTR	0.0435,0.0435	167.3813871,2.0734177
1_17969158	+	T	2.33934	yes	AT1G48600	NMT2	AT1G48600.1,AT1G48600.2	3UTR,3UTR	0.2899,0.2899	167.3813871,2.0734177
1_17969168	+	G	1.6592	yes	AT1G48600	NMT2	AT1G48600.1,AT1G48600.2	3UTR,3UTR	0.3261,0.3261	167.3813871,2.0734177
1_17969183	+	A	0.515241	yes	AT1G48600	NMT2	AT1G48600.1,AT1G48600.2	3UTR,3UTR	0.3804,0.3804	167.3813871,2.0734177
1_17969203	+	T	10.1031	yes	AT1G48600	NMT2	AT1G48600.1,AT1G48600.2	3UTR,3UTR	0.4529,0.4529	167.3813871,2.0734177
1_17969212	+	T	0.0563445	yes	AT1G48600	NMT2	AT1G48600.1,AT1G48600.2	3UTR,3UTR	0.4855,0.4855	167.3813871,2.0734177
1_17969221	+	C	0.0867016	yes	AT1G48600	NMT2	AT1G48600.1,AT1G48600.2	3UTR,3UTR	0.5181,0.5181	167.3813871,2.0734177
1_18101498	+	T	0.727085	yes	AT1G48920	NUCL1	AT1G48920.1	3UTR	0.2427	333.8165129
1_18101529	+	T	4.29454	yes	AT1G48920	NUCL1	AT1G48920.1	3UTR	0.343	333.8165129
1_18101563	+	T	2.25238	yes	AT1G48920	NUCL1	AT1G48920.1	3UTR	0.4531	333.8165129
1_18218018	+	T	0.0996145	no	AT1G49240	ACT8	AT1G49240.1	3UTR	0.179	364.472392
1_18218019	+	T	2.5294	no	AT1G49240	ACT8	AT1G49240.1	3UTR	0.1816	364.472392
1_18218020	+	T	4.31957	yes	AT1G49240	ACT8	AT1G49240.1	3UTR	0.1841	364.472392
1_18218032	+	A	11.8162	yes	AT1G49240	ACT8	AT1G49240.1	3UTR	0.2148	364.472392
1_18218033	+	T	1.64791	no	AT1G49240	ACT8	AT1G49240.1	3UTR	0.2174	364.472392
1_18218054	+	T	0.216556	no	AT1G49240	ACT8	AT1G49240.1	3UTR	0.2711	364.472392
1_18218055	+	T	0.864861	yes	AT1G49240	ACT8	AT1G49240.1	3UTR	0.2737	364.472392
1_18218098	+	T	2.28871	yes	AT1G49240	ACT8	AT1G49240.1	3UTR	0.3836	364.472392
1_18218099	+	T	1.47032	no	AT1G49240	ACT8	AT1G49240.1	3UTR	0.3862	364.472392
1_18218111	+	C	0.362784	yes	AT1G49240	ACT8	AT1G49240.1	3UTR	0.4169	364.472392
1_18218177	+	G	2.65423	yes	AT1G49240	ACT8	AT1G49240.1	3UTR	0.5857	364.472392
1_18218181	+	G	1.28464	yes	AT1G49240	ACT8	AT1G49240.1	3UTR	0.5959	364.472392
1_18218183	+	T	3.04002	yes	AT1G49240	ACT8	AT1G49240.1	3UTR	0.601	364.472392
1_18218185	+	G	5.63619	no	AT1G49240	ACT8	AT1G49240.1	3UTR	0.6061	364.472392
1_18218186	+	T	15.2339	no	AT1G49240	ACT8	AT1G49240.1	3UTR	0.6087	364.472392
1_18218187	+	T	20.6529	yes	AT1G49240	ACT8	AT1G49240.1	3UTR	0.6113	364.472392
1_18218189	+	G	5.57734	no	AT1G49240	ACT8	AT1G49240.1	3UTR	0.6164	364.472392
1_18218190	+	T	10.1953	yes	AT1G49240	ACT8	AT1G49240.1	3UTR	0.6189	364.472392
1_18218191	+	A	5.57938	no	AT1G49240	ACT8	AT1G49240.1	3UTR	0.6215	364.472392
1_18218194	+	C	0.667729	yes	AT1G49240	ACT8	AT1G49240.1	3UTR	0.6292	364.472392
1_18218195	+	T	0.372418	no	AT1G49240	ACT8	AT1G49240.1	3UTR	0.6317	364.472392
1_18218197	+	T	19.2748	yes	AT1G49240	ACT8	AT1G49240.1	3UTR	0.6368	364.472392
1_18218198	+	T	4.05483	no	AT1G49240	ACT8	AT1G49240.1	3UTR	0.6394	364.472392
1_18237067	+	A	1.58104	no	AT1G49300	RABG3E	AT1G49300.1	3UTR	0.196	61.2349629
1_18237068	+	A	5.80944	yes	AT1G49300	RABG3E	AT1G49300.1	3UTR	0.198	61.2349629
1_18237069	+	T	3.24585	no	AT1G49300	RABG3E	AT1G49300.1	3UTR	0.2	61.2349629
1_18237171	+	T	0.731581	yes	AT1G49300	RABG3E	AT1G49300.1	3UTR	0.404	61.2349629
1_18419924	+	C	1.35576	yes	AT1G49760	PAB8	AT1G49760.1	3UTR	0.4762	126.3604979
1_18519803	+	T	0.00193699	no	AT1G50010	TUBA4	AT1G50010.1	3UTR	0.2704	434.1325918
1_18519804	+	A	1.49483	yes	AT1G50010	TUBA4	AT1G50010.1	3UTR	0.2741	434.1325918
1_18872798	+	A	0.704354	yes	AT1G50920	AT1G50920	AT1G50920.1	3UTR	0.3993	83.9360038
1_18872811	+	T	0.704354	yes	AT1G50920	AT1G50920	AT1G50920.1	3UTR	0.4452	83.9360038
1_18872826	+	T	1.19542	yes	AT1G50920	AT1G50920	AT1G50920.1	3UTR	0.4982	83.9360038
1_18929573	+	T	0.773943	yes	AT1G51070	BHLH115	AT1G51070.1,AT1G51070.2	3UTR,3UTR	0.2379,0.3554	156.1292096,0.1057927
1_18929585	+	G	4.11158	yes	AT1G51070	BHLH115	AT1G51070.1,AT1G51070.2	3UTR,3UTR	0.2863,0.4277	156.1292096,0.1057927
1_18951708	+	T	2.23894	yes	AT1G51160	AT1G51160	AT1G51160.1,AT1G51160.2,AT1G51160.3	3UTR,3UTR,3UTR	0.482,0.4455,0.4727	31.6979881,19.4591974,3.8650526
1_18951737	+	A	2.50302	yes	AT1G51160	AT1G51160	AT1G51160.1,AT1G51160.2,AT1G51160.3	3UTR,3UTR,3UTR	0.577,0.5333,0.5659	31.6979881,19.4591974,3.8650526
1_18986336	+	T	4.8813	yes	AT1G51200	SAP2	AT1G51200.1,AT1G51200.2,AT1G51200.4,AT1G51200.3	3UTR,3UTR,3UTR,3UTR	0.2938,0.2938,0.2812,0.2812	193.6171547,8.2480623,4.8391573,0.8091455
1_18986337	+	T	0.930608	no	AT1G51200	SAP2	AT1G51200.1,AT1G51200.2,AT1G51200.4,AT1G51200.3	3UTR,3UTR,3UTR,3UTR	0.2962,0.2962,0.2834,0.2834	193.6171547,8.2480623,4.8391573,0.8091455
1_18986338	+	T	1.77137	no	AT1G51200	SAP2	AT1G51200.1,AT1G51200.2,AT1G51200.4,AT1G51200.3	3UTR,3UTR,3UTR,3UTR	0.2986,0.2986,0.2857,0.2857	193.6171547,8.2480623,4.8391573,0.8091455
1_18986364	+	G	1.06421	yes	AT1G51200	SAP2	AT1G51200.1,AT1G51200.2,AT1G51200.4,AT1G51200.3	3UTR,3UTR,3UTR,3UTR	0.3602,0.3602,0.3447,0.3447	193.6171547,8.2480623,4.8391573,0.8091455
1_18986365	+	G	0.405665	no	AT1G51200	SAP2	AT1G51200.1,AT1G51200.2,AT1G51200.4,AT1G51200.3	3UTR,3UTR,3UTR,3UTR	0.3626,0.3626,0.3469,0.3469	193.6171547,8.2480623,4.8391573,0.8091455
1_18986372	+	C	8.58906	no	AT1G51200	SAP2	AT1G51200.1,AT1G51200.2,AT1G51200.4,AT1G51200.3	3UTR,3UTR,3UTR,3UTR	0.3791,0.3791,0.3628,0.3628	193.6171547,8.2480623,4.8391573,0.8091455
1_18986373	+	T	2.48059	no	AT1G51200	SAP2	AT1G51200.1,AT1G51200.2,AT1G51200.4,AT1G51200.3	3UTR,3UTR,3UTR,3UTR	0.3815,0.3815,0.3651,0.3651	193.6171547,8.2480623,4.8391573,0.8091455
1_18986374	+	A	9.84536	yes	AT1G51200	SAP2	AT1G51200.1,AT1G51200.2,AT1G51200.4,AT1G51200.3	3UTR,3UTR,3UTR,3UTR	0.3839,0.3839,0.3673,0.3673	193.6171547,8.2480623,4.8391573,0.8091455
1_18986375	+	T	6.36402	no	AT1G51200	SAP2	AT1G51200.1,AT1G51200.2,AT1G51200.4,AT1G51200.3	3UTR,3UTR,3UTR,3UTR	0.3863,0.3863,0.3696,0.3696	193.6171547,8.2480623,4.8391573,0.8091455
1_18986377	+	A	10.6939	yes	AT1G51200	SAP2	AT1G51200.1,AT1G51200.2,AT1G51200.4,AT1G51200.3	3UTR,3UTR,3UTR,3UTR	0.391,0.391,0.3741,0.3741	193.6171547,8.2480623,4.8391573,0.8091455
1_18986378	+	T	3.02908	no	AT1G51200	SAP2	AT1G51200.1,AT1G51200.2,AT1G51200.4,AT1G51200.3	3UTR,3UTR,3UTR,3UTR	0.3934,0.3934,0.3764,0.3764	193.6171547,8.2480623,4.8391573,0.8091455
1_18986383	+	G	2.6217	no	AT1G51200	SAP2	AT1G51200.1,AT1G51200.2,AT1G51200.4,AT1G51200.3	3UTR,3UTR,3UTR,3UTR	0.4052,0.4052,0.3878,0.3878	193.6171547,8.2480623,4.8391573,0.8091455
1_18986384	+	T	11.5189	no	AT1G51200	SAP2	AT1G51200.1,AT1G51200.2,AT1G51200.4,AT1G51200.3	3UTR,3UTR,3UTR,3UTR	0.4076,0.4076,0.39,0.39	193.6171547,8.2480623,4.8391573,0.8091455
1_18986385	+	T	12.7503	yes	AT1G51200	SAP2	AT1G51200.1,AT1G51200.2,AT1G51200.4,AT1G51200.3	3UTR,3UTR,3UTR,3UTR	0.41,0.41,0.3923,0.3923	193.6171547,8.2480623,4.8391573,0.8091455
1_18986471	+	T	1.56634	yes	AT1G51200	SAP2	AT1G51200.1,AT1G51200.2,AT1G51200.4,AT1G51200.3	3UTR,3UTR,3UTR,3UTR	0.6137,0.6137,0.5873,0.5873	193.6171547,8.2480623,4.8391573,0.8091455
1_18986485	+	T	6.68551	yes	AT1G51200	SAP2	AT1G51200.1,AT1G51200.2,AT1G51200.4,AT1G51200.3	3UTR,3UTR,3UTR,3UTR	0.6469,0.6469,0.619,0.619	193.6171547,8.2480623,4.8391573,0.8091455
1_18986486	+	A	1.62459	no	AT1G51200	SAP2	AT1G51200.1,AT1G51200.2,AT1G51200.4,AT1G51200.3	3UTR,3UTR,3UTR,3UTR	0.6493,0.6493,0.6213,0.6213	193.6171547,8.2480623,4.8391573,0.8091455
1_18986498	+	T	2.30469	yes	AT1G51200	SAP2	AT1G51200.1,AT1G51200.2,AT1G51200.4,AT1G51200.3	3UTR,3UTR,3UTR,3UTR	0.6777,0.6777,0.6485,0.6485	193.6171547,8.2480623,4.8391573,0.8091455
1_18986506	+	T	0.566989	yes	AT1G51200	SAP2	AT1G51200.1,AT1G51200.2,AT1G51200.4,AT1G51200.3	3UTR,3UTR,3UTR,3UTR	0.6967,0.6967,0.6667,0.6667	193.6171547,8.2480623,4.8391573,0.8091455
1_18986518	+	A	10.7547	no	AT1G51200	SAP2	AT1G51200.1,AT1G51200.2,AT1G51200.4,AT1G51200.3	3UTR,3UTR,3UTR,3UTR	0.7251,0.7251,0.6939,0.6939	193.6171547,8.2480623,4.8391573,0.8091455
1_18986519	+	T	7.07391	no	AT1G51200	SAP2	AT1G51200.1,AT1G51200.2,AT1G51200.4,AT1G51200.3	3UTR,3UTR,3UTR,3UTR	0.7275,0.7275,0.6961,0.6961	193.6171547,8.2480623,4.8391573,0.8091455
1_18986520	+	T	13.3705	yes	AT1G51200	SAP2	AT1G51200.1,AT1G51200.2,AT1G51200.4,AT1G51200.3	3UTR,3UTR,3UTR,3UTR	0.7299,0.7299,0.6984,0.6984	193.6171547,8.2480623,4.8391573,0.8091455
1_18986521	+	T	0.688353	no	AT1G51200	SAP2	AT1G51200.1,AT1G51200.2,AT1G51200.4,AT1G51200.3	3UTR,3UTR,3UTR,3UTR	0.7322,0.7322,0.7007,0.7007	193.6171547,8.2480623,4.8391573,0.8091455
1_18986522	+	A	0.595751	no	AT1G51200	SAP2	AT1G51200.1,AT1G51200.2,AT1G51200.4,AT1G51200.3	3UTR,3UTR,3UTR,3UTR	0.7346,0.7346,0.7029,0.7029	193.6171547,8.2480623,4.8391573,0.8091455
1_18986523	+	A	2.14305	no	AT1G51200	SAP2	AT1G51200.1,AT1G51200.2,AT1G51200.4,AT1G51200.3	3UTR,3UTR,3UTR,3UTR	0.737,0.737,0.7052,0.7052	193.6171547,8.2480623,4.8391573,0.8091455
1_19153707	+	T	5.74944	no	AT1G51650	AT1G51650	AT1G51650.1	3UTR	0.1589	639.4716155
1_19153708	+	T	7.03064	no	AT1G51650	AT1G51650	AT1G51650.1	3UTR	0.1614	639.4716155
1_19153709	+	T	26.0443	yes	AT1G51650	AT1G51650	AT1G51650.1	3UTR	0.1638	639.4716155
1_19153713	+	G	0.471665	no	AT1G51650	AT1G51650	AT1G51650.1	3UTR	0.1736	639.4716155
1_19153714	+	T	6.28896	yes	AT1G51650	AT1G51650	AT1G51650.1	3UTR	0.176	639.4716155
1_19153715	+	C	5.59773	no	AT1G51650	AT1G51650	AT1G51650.1	3UTR	0.1785	639.4716155
1_19153717	+	A	13.2126	yes	AT1G51650	AT1G51650	AT1G51650.1	3UTR	0.1834	639.4716155
1_19153718	+	C	0.0625693	no	AT1G51650	AT1G51650	AT1G51650.1	3UTR	0.1858	639.4716155
1_19153719	+	A	11.2967	no	AT1G51650	AT1G51650	AT1G51650.1	3UTR	0.1883	639.4716155
1_19153735	+	A	1.83277	yes	AT1G51650	AT1G51650	AT1G51650.1	3UTR	0.2274	639.4716155
1_19153790	+	T	0.0908818	yes	AT1G51650	AT1G51650	AT1G51650.1	3UTR	0.3619	639.4716155
1_19153798	+	T	5.31083	yes	AT1G51650	AT1G51650	AT1G51650.1	3UTR	0.3814	639.4716155
1_19153800	+	T	0.284846	yes	AT1G51650	AT1G51650	AT1G51650.1	3UTR	0.3863	639.4716155
1_19153810	+	C	0.354902	no	AT1G51650	AT1G51650	AT1G51650.1	3UTR	0.4108	639.4716155
1_19153811	+	T	8.29651	yes	AT1G51650	AT1G51650	AT1G51650.1	3UTR	0.4132	639.4716155
1_19153813	+	T	7.27512	no	AT1G51650	AT1G51650	AT1G51650.1	3UTR	0.4181	639.4716155
1_19153814	+	T	7.31332	yes	AT1G51650	AT1G51650	AT1G51650.1	3UTR	0.4205	639.4716155
1_19153816	+	G	7.64654	yes	AT1G51650	AT1G51650	AT1G51650.1	3UTR	0.4254	639.4716155
1_19153824	+	A	1.96273	no	AT1G51650	AT1G51650	AT1G51650.1	3UTR	0.445	639.4716155
1_19153825	+	C	0.218619	no	AT1G51650	AT1G51650	AT1G51650.1	3UTR	0.4474	639.4716155
1_19153826	+	A	3.83762	yes	AT1G51650	AT1G51650	AT1G51650.1	3UTR	0.4499	639.4716155
1_19153827	+	A	2.11861	no	AT1G51650	AT1G51650	AT1G51650.1	3UTR	0.4523	639.4716155
1_19153828	+	T	0.948531	no	AT1G51650	AT1G51650	AT1G51650.1	3UTR	0.4548	639.4716155
1_19153840	+	T	0.447653	yes	AT1G51650	AT1G51650	AT1G51650.1	3UTR	0.4841	639.4716155
1_19170312	+	T	1.2057	yes	AT1G51690	PP2AB1	AT1G51690.2,AT1G51690.5,AT1G51690.1,AT1G51690.4,AT1G51690.3	3UTR,3UTR,3UTR,3UTR,3UTR	0.7155,0.711,0.711,0.711,0.711	24.7139407,6.6381769,0.1429221,0.0030141,0
1_19455554	+	T	3.51868	no	AT1G52230	PSAH2	AT1G52230.1	3UTR	0.283	1277.8858987
1_19455555	+	T	7.8187	no	AT1G52230	PSAH2	AT1G52230.1	3UTR	0.2893	1277.8858987
1_19455556	+	C	10.4015	yes	AT1G52230	PSAH2	AT1G52230.1	3UTR	0.2956	1277.8858987
1_19455566	+	T	2.73699	yes	AT1G52230	PSAH2	AT1G52230.1	3UTR	0.3585	1277.8858987
1_19455574	+	T	0.393933	yes	AT1G52230	PSAH2	AT1G52230.1	3UTR	0.4088	1277.8858987
1_19455576	+	T	5.43226	yes	AT1G52230	PSAH2	AT1G52230.1	3UTR	0.4214	1277.8858987
1_19455592	+	G	1.25912	yes	AT1G52230	PSAH2	AT1G52230.1	3UTR	0.522	1277.8858987
1_19455593	+	T	1.01147	no	AT1G52230	PSAH2	AT1G52230.1	3UTR	0.5283	1277.8858987
1_19455602	+	T	13.8828	yes	AT1G52230	PSAH2	AT1G52230.1	3UTR	0.5849	1277.8858987
1_19455604	+	G	0.115198	no	AT1G52230	PSAH2	AT1G52230.1	3UTR	0.5975	1277.8858987
1_19455605	+	T	2.91675	yes	AT1G52230	PSAH2	AT1G52230.1	3UTR	0.6038	1277.8858987
1_19497561	+	T	0.665472	yes	AT1G52347	AT1G52347	AT1G52347.1,AT1G52347.2	CDS,CDS	0.6518,0.8698	NA,NA
1_19592576	+	T	2.31882	yes	AT1G52600	AT1G52600	AT1G52600.1	3UTR	0.3648	46.3765232
1_19592620	+	T	0.360619	yes	AT1G52600	AT1G52600	AT1G52600.1	3UTR	0.5451	46.3765232
1_19592621	+	T	0.0692798	no	AT1G52600	AT1G52600	AT1G52600.1	3UTR	0.5492	46.3765232
1_19646332	+	T	3.58933	no	AT1G52740	HTA9	AT1G52740.1	3UTR	0.4183	283.9669499
1_19646333	+	T	4.20684	no	AT1G52740	HTA9	AT1G52740.1	3UTR	0.4221	283.9669499
1_19646334	+	G	0.870476	no	AT1G52740	HTA9	AT1G52740.1	3UTR	0.4259	283.9669499
1_19646335	+	T	1.59174	no	AT1G52740	HTA9	AT1G52740.1	3UTR	0.4297	283.9669499
1_19646336	+	T	6.21512	yes	AT1G52740	HTA9	AT1G52740.1	3UTR	0.4335	283.9669499
1_19646337	+	C	3.48843	no	AT1G52740	HTA9	AT1G52740.1	3UTR	0.4373	283.9669499
1_19646338	+	G	1.71557	no	AT1G52740	HTA9	AT1G52740.1	3UTR	0.4411	283.9669499
1_19646339	+	T	1.2402	no	AT1G52740	HTA9	AT1G52740.1	3UTR	0.4449	283.9669499
1_19646355	+	T	4.14847	yes	AT1G52740	HTA9	AT1G52740.1	3UTR	0.5057	283.9669499
1_19646357	+	T	1.69138	no	AT1G52740	HTA9	AT1G52740.1	3UTR	0.5133	283.9669499
1_19646358	+	G	2.09011	no	AT1G52740	HTA9	AT1G52740.1	3UTR	0.5171	283.9669499
1_19646359	+	T	5.59859	yes	AT1G52740	HTA9	AT1G52740.1	3UTR	0.5209	283.9669499
1_19646360	+	T	1.73485	no	AT1G52740	HTA9	AT1G52740.1	3UTR	0.5247	283.9669499
1_19646386	+	T	1.93444	no	AT1G52740	HTA9	AT1G52740.1	3UTR	0.6236	283.9669499
1_19646387	+	T	6.81484	yes	AT1G52740	HTA9	AT1G52740.1	3UTR	0.6274	283.9669499
1_19646388	+	T	4.22364	no	AT1G52740	HTA9	AT1G52740.1	3UTR	0.6312	283.9669499
1_19646390	+	A	4.55456	yes	AT1G52740	HTA9	AT1G52740.1	3UTR	0.6388	283.9669499
1_19646395	+	G	7.47433	yes	AT1G52740	HTA9	AT1G52740.1	3UTR	0.6578	283.9669499
1_19646396	+	T	1.98484	no	AT1G52740	HTA9	AT1G52740.1	3UTR	0.6616	283.9669499
1_19646408	+	T	0.800104	yes	AT1G52740	HTA9	AT1G52740.1	3UTR	0.7072	283.9669499
1_19687788	+	T	3.97326	yes	AT1G52870	AT1G52870	AT1G52870.2,AT1G52870.1	3UTR,3UTR	0.3123,0.6053	21.3191405,0.9776152
1_19687805	+	T	7.59909	yes	AT1G52870	AT1G52870	AT1G52870.2,AT1G52870.1	3UTR,3UTR	0.361,0.6947	21.3191405,0.9776152
1_19687818	+	A	0.0292554	yes	AT1G52870	AT1G52870	AT1G52870.2,AT1G52870.1	3UTR,3UTR	0.3983,0.7632	21.3191405,0.9776152
1_19687820	+	A	3.97246	no	AT1G52870	AT1G52870	AT1G52870.2,AT1G52870.1	3UTR,3UTR	0.404,0.7737	21.3191405,0.9776152
1_19687821	+	A	6.39556	yes	AT1G52870	AT1G52870	AT1G52870.2,AT1G52870.1	3UTR,3UTR	0.4069,0.7789	21.3191405,0.9776152
1_19687832	+	C	0.47485	yes	AT1G52870	AT1G52870	AT1G52870.2,AT1G52870.1	3UTR,3UTR	0.4384,0.8368	21.3191405,0.9776152
1_19740257	+	A	0.72364	no	AT1G52980	NUG2	AT1G52980.1	3UTR	0.3767	55.2112878
1_19740258	+	A	0.6033	no	AT1G52980	NUG2	AT1G52980.1	3UTR	0.3836	55.2112878
1_19740259	+	T	3.38171	yes	AT1G52980	NUG2	AT1G52980.1	3UTR	0.3904	55.2112878
1_19740266	+	A	0.934223	yes	AT1G52980	NUG2	AT1G52980.1	3UTR	0.4384	55.2112878
1_19847589	+	T	3.13835	yes	AT1G53210	AT1G53210	AT1G53210.1	3UTR	0.1708	126.2902541
1_19847590	+	T	1.25037	no	AT1G53210	AT1G53210	AT1G53210.1	3UTR	0.1739	126.2902541
1_19847625	+	T	3.88468	yes	AT1G53210	AT1G53210	AT1G53210.1	3UTR	0.2826	126.2902541
1_19847646	+	T	0.824895	no	AT1G53210	AT1G53210	AT1G53210.1	3UTR	0.3478	126.2902541
1_19847647	+	T	1.45658	yes	AT1G53210	AT1G53210	AT1G53210.1	3UTR	0.3509	126.2902541
1_19847676	+	T	0.0113417	no	AT1G53210	AT1G53210	AT1G53210.1	3UTR	0.441	126.2902541
1_19847677	+	T	8.82336	yes	AT1G53210	AT1G53210	AT1G53210.1	3UTR	0.4441	126.2902541
1_19847678	+	A	6.73642	no	AT1G53210	AT1G53210	AT1G53210.1	3UTR	0.4472	126.2902541
1_20038147	+	T	0.645782	yes	AT1G53670	MSRB1	AT1G53670.1,AT1G53670.2	3UTR,3UTR	0.3871,0.5	63.3409711,0.0235844
1_20038156	+	G	0.629418	yes	AT1G53670	MSRB1	AT1G53670.1,AT1G53670.2	3UTR,3UTR	0.4355,0.5625	63.3409711,0.0235844
1_20038160	+	G	0.66584	yes	AT1G53670	MSRB1	AT1G53670.1,AT1G53670.2	3UTR,3UTR	0.457,0.5903	63.3409711,0.0235844
1_20038164	+	G	0.189841	no	AT1G53670	MSRB1	AT1G53670.1,AT1G53670.2	3UTR,3UTR	0.4785,0.6181	63.3409711,0.0235844
1_20038165	+	T	7.89475	yes	AT1G53670	MSRB1	AT1G53670.1,AT1G53670.2	3UTR,3UTR	0.4839,0.625	63.3409711,0.0235844
1_20169510	+	T	7.12614	yes	AT1G54030	MVP1	AT1G54030.1,AT1G54030.2	3UTR,3UTR	0.1594,0.7046	102.4402815,3.0219972
1_20169524	+	A	0.393872	yes	AT1G54030	MVP1	AT1G54030.1,AT1G54030.2	3UTR,3UTR	0.2271,0.7284	102.4402815,3.0219972
1_20169564	+	T	2.10153	yes	AT1G54030	MVP1	AT1G54030.1,AT1G54030.2	3UTR,3UTR	0.4203,0.7963	102.4402815,3.0219972
1_20169574	+	T	2.12943	yes	AT1G54030	MVP1	AT1G54030.1,AT1G54030.2	3UTR,3UTR	0.4686,0.8132	102.4402815,3.0219972
1_20242477	+	G	0.81374	no	AT1G54210	ATG12A	AT1G54210.1,AT1G54210.2	3UTR,3UTR	0.5367,0.5793	7.8336188,0.2338171
1_20242478	+	T	0.833795	yes	AT1G54210	ATG12A	AT1G54210.1,AT1G54210.2	3UTR,3UTR	0.5395,0.5823	7.8336188,0.2338171
1_20262074	+	T	0.585282	yes	AT1G54270	TIF4A-2	AT1G54270.1,AT1G54270.2	3UTR,3UTR	0.2227,0.3056	126.2707665,0.0421647
1_20262117	+	T	0.586235	yes	AT1G54270	TIF4A-2	AT1G54270.1,AT1G54270.2	3UTR,3UTR	0.3968,0.5444	126.2707665,0.0421647
1_20356832	+	T	1.79043	no	AT1G54490	XRN4	AT1G54490.1,AT1G54490.2	3UTR,3UTR	0.683,0.683	21.0902,0.0673818
1_20356833	+	T	2.67289	yes	AT1G54490	XRN4	AT1G54490.1,AT1G54490.2	3UTR,3UTR	0.6868,0.6868	21.0902,0.0673818
1_20365911	+	T	0.545886	yes	AT1G54520	AT1G54520	AT1G54520.1	3UTR	0.1452	43.1301872
1_20365959	+	T	3.54177	no	AT1G54520	AT1G54520	AT1G54520.1	3UTR	0.3387	43.1301872
1_20365960	+	T	4.97773	no	AT1G54520	AT1G54520	AT1G54520.1	3UTR	0.3427	43.1301872
1_20365961	+	G	1.87241	no	AT1G54520	AT1G54520	AT1G54520.1	3UTR	0.3468	43.1301872
1_20365962	+	T	1.13264	no	AT1G54520	AT1G54520	AT1G54520.1	3UTR	0.3508	43.1301872
1_20365963	+	T	4.85764	no	AT1G54520	AT1G54520	AT1G54520.1	3UTR	0.3548	43.1301872
1_20365964	+	T	5.47957	yes	AT1G54520	AT1G54520	AT1G54520.1	3UTR	0.3589	43.1301872
1_20390724	+	A	0.253624	yes	AT1G54580	ACP2	AT1G54580.1	CDS	0.6406	261.3172094
1_20390776	+	T	1.0919	no	AT1G54580	ACP2	AT1G54580.1	3UTR	0.0133	261.3172094
1_20390777	+	T	0.254344	no	AT1G54580	ACP2	AT1G54580.1	3UTR	0.016	261.3172094
1_20390778	+	T	3.52796	no	AT1G54580	ACP2	AT1G54580.1	3UTR	0.0186	261.3172094
1_20390779	+	A	4.17456	yes	AT1G54580	ACP2	AT1G54580.1	3UTR	0.0213	261.3172094
1_20390855	+	T	2.73856	yes	AT1G54580	ACP2	AT1G54580.1	3UTR	0.2234	261.3172094
1_20390919	+	T	1.63213	no	AT1G54580	ACP2	AT1G54580.1	3UTR	0.3936	261.3172094
1_20390920	+	T	1.39281	no	AT1G54580	ACP2	AT1G54580.1	3UTR	0.3963	261.3172094
1_20390921	+	C	2.86416	yes	AT1G54580	ACP2	AT1G54580.1	3UTR	0.3989	261.3172094
1_20440915	+	C	0.116873	yes	AT1G54780	TLP18.3	AT1G54780.1	CDS	0.8462	189.6993768
1_20441001	+	C	11.2862	yes	AT1G54780	TLP18.3	AT1G54780.1	3UTR	0.2293	189.6993768
1_20441002	+	T	1.3431	no	AT1G54780	TLP18.3	AT1G54780.1	3UTR	0.2341	189.6993768
1_20441019	+	A	0.317257	yes	AT1G54780	TLP18.3	AT1G54780.1	3UTR	0.3171	189.6993768
1_20441048	+	T	4.94048	yes	AT1G54780	TLP18.3	AT1G54780.1	3UTR	0.4585	189.6993768
1_20441050	+	A	2.86206	no	AT1G54780	TLP18.3	AT1G54780.1	3UTR	0.4683	189.6993768
1_20441051	+	T	0.92928	no	AT1G54780	TLP18.3	AT1G54780.1	3UTR	0.4732	189.6993768
1_20441052	+	T	7.56162	yes	AT1G54780	TLP18.3	AT1G54780.1	3UTR	0.478	189.6993768
1_20441053	+	T	1.36519	no	AT1G54780	TLP18.3	AT1G54780.1	3UTR	0.4829	189.6993768
1_20516348	+	T	1.19742	yes	AT1G55000	AT1G55000	AT1G55000.1,AT1G55000.3,AT1G55000.2	3UTR,3UTR,3UTR	0.4629,0.3725,0.3393	21.9204637,2.0655454,1.5372282
1_20516380	+	A	0.449881	yes	AT1G55000	AT1G55000	AT1G55000.1,AT1G55000.3,AT1G55000.2	3UTR,3UTR,3UTR	0.5448,0.5294,0.4821	21.9204637,2.0655454,1.5372282
1_20516408	+	T	0.743497	yes	AT1G55000	AT1G55000	AT1G55000.1,AT1G55000.3,AT1G55000.2	3UTR,3UTR,3UTR	0.6164,0.6667,0.6071	21.9204637,2.0655454,1.5372282
1_20579944	+	C	0.928795	yes	AT1G55160	AT1G55160	AT1G55160.1,AT1G55160.2,AT1G55160.3	3UTR,3UTR,3UTR	0.6796,0.6796,0.6796	20.3496699,10.2551241,0.0164402
1_20715412	+	C	0.652403	yes	AT1G55480	ZKT	AT1G55480.1	3UTR	0.2317	74.0445397
1_20876164	+	A	0.691447	yes	AT1G55840	AT1G55840	AT1G55840.1,AT1G55840.2	3UTR,3UTR	0.4434,0.5731	37.0247888,1.9783251
1_20876199	+	T	0.660962	yes	AT1G55840	AT1G55840	AT1G55840.1,AT1G55840.2	3UTR,3UTR	0.5505,0.7115	37.0247888,1.9783251
1_20963292	+	C	4.93833	no	AT1G56045	RPL41E	AT1G56045.1	3UTR	0.083	402.2166522
1_20963293	+	T	6.44526	yes	AT1G56045	RPL41E	AT1G56045.1	3UTR	0.0866	402.2166522
1_20963338	+	T	0.959359	yes	AT1G56045	RPL41E	AT1G56045.1	3UTR	0.2491	402.2166522
1_20963359	+	T	0.329793	yes	AT1G56045	RPL41E	AT1G56045.1	3UTR	0.3249	402.2166522
1_20963379	+	T	26.7962	yes	AT1G56045	RPL41E	AT1G56045.1	3UTR	0.3971	402.2166522
1_20963380	+	T	9.6156	no	AT1G56045	RPL41E	AT1G56045.1	3UTR	0.4007	402.2166522
1_20963381	+	T	8.02149	no	AT1G56045	RPL41E	AT1G56045.1	3UTR	0.4043	402.2166522
1_20963382	+	T	1.48968	no	AT1G56045	RPL41E	AT1G56045.1	3UTR	0.4079	402.2166522
1_20963384	+	A	8.45115	yes	AT1G56045	RPL41E	AT1G56045.1	3UTR	0.4152	402.2166522
1_20963400	+	T	1.9164	yes	AT1G56045	RPL41E	AT1G56045.1	3UTR	0.4729	402.2166522
1_20963412	+	T	17.3617	yes	AT1G56045	RPL41E	AT1G56045.1	3UTR	0.5162	402.2166522
1_20963414	+	T	10.7487	yes	AT1G56045	RPL41E	AT1G56045.1	3UTR	0.5235	402.2166522
1_20963420	+	T	0.156898	yes	AT1G56045	RPL41E	AT1G56045.1	3UTR	0.5451	402.2166522
1_20963423	+	T	25.9272	no	AT1G56045	RPL41E	AT1G56045.1	3UTR	0.556	402.2166522
1_20963424	+	A	12.2678	no	AT1G56045	RPL41E	AT1G56045.1	3UTR	0.5596	402.2166522
1_20963425	+	T	17.3491	no	AT1G56045	RPL41E	AT1G56045.1	3UTR	0.5632	402.2166522
1_20963426	+	C	15.7125	no	AT1G56045	RPL41E	AT1G56045.1	3UTR	0.5668	402.2166522
1_20963427	+	T	27.8379	yes	AT1G56045	RPL41E	AT1G56045.1	3UTR	0.5704	402.2166522
1_21030516	+	G	0.258757	yes	AT1G56190	AT1G56190	AT1G56190.1,AT1G56190.2	3UTR,3UTR	0.2664,0.3653	102.9592331,8.2285499
1_21030517	+	T	0.258757	no	AT1G56190	AT1G56190	AT1G56190.1,AT1G56190.2	3UTR,3UTR	0.2707,0.3713	102.9592331,8.2285499
1_21030529	+	T	0.250293	yes	AT1G56190	AT1G56190	AT1G56190.1,AT1G56190.2	3UTR,3UTR	0.3231,0.4431	102.9592331,8.2285499
1_21030542	+	C	5.1309	yes	AT1G56190	AT1G56190	AT1G56190.1,AT1G56190.2	3UTR,3UTR	0.3799,0.521	102.9592331,8.2285499
1_21030543	+	A	4.93817	no	AT1G56190	AT1G56190	AT1G56190.1,AT1G56190.2	3UTR,3UTR	0.3843,0.5269	102.9592331,8.2285499
1_21030567	+	T	0.400433	yes	AT1G56190	AT1G56190	AT1G56190.1,AT1G56190.2	3UTR,3UTR	0.4891,0.6707	102.9592331,8.2285499
1_21030568	+	T	0.341935	no	AT1G56190	AT1G56190	AT1G56190.1,AT1G56190.2	3UTR,3UTR	0.4934,0.6766	102.9592331,8.2285499
1_21030574	+	T	0.0114621	yes	AT1G56190	AT1G56190	AT1G56190.1,AT1G56190.2	3UTR,3UTR	0.5197,0.7126	102.9592331,8.2285499
1_21031910	+	T	2.47778	yes	AT1G56200	emb1303	AT1G56200.1,AT1G56200.2	3UTR,3UTR	0.0663,0.1204	248.7339224,0.2465322
1_21031911	+	T	1.3027	no	AT1G56200	emb1303	AT1G56200.1,AT1G56200.2	3UTR,3UTR	0.0692,0.1257	248.7339224,0.2465322
1_21031912	+	A	0.160651	no	AT1G56200	emb1303	AT1G56200.1,AT1G56200.2	3UTR,3UTR	0.072,0.1309	248.7339224,0.2465322
1_21031943	+	T	0.796531	no	AT1G56200	emb1303	AT1G56200.1,AT1G56200.2	3UTR,3UTR	0.1614,0.2932	248.7339224,0.2465322
1_21031944	+	T	1.73592	no	AT1G56200	emb1303	AT1G56200.1,AT1G56200.2	3UTR,3UTR	0.1643,0.2984	248.7339224,0.2465322
1_21031945	+	C	4.29519	yes	AT1G56200	emb1303	AT1G56200.1,AT1G56200.2	3UTR,3UTR	0.1671,0.3037	248.7339224,0.2465322
1_21031973	+	T	5.7616	yes	AT1G56200	emb1303	AT1G56200.1,AT1G56200.2	3UTR,3UTR	0.2478,0.4503	248.7339224,0.2465322
1_21031987	+	G	2.65687	yes	AT1G56200	emb1303	AT1G56200.1,AT1G56200.2	3UTR,3UTR	0.2882,0.5236	248.7339224,0.2465322
1_21031999	+	T	0.266909	yes	AT1G56200	emb1303	AT1G56200.1,AT1G56200.2	3UTR,3UTR	0.3228,0.5864	248.7339224,0.2465322
1_21032009	+	C	1.01114	yes	AT1G56200	emb1303	AT1G56200.1,AT1G56200.2	3UTR,3UTR	0.3516,0.6387	248.7339224,0.2465322
1_21144237	+	A	1.54365	yes	AT1G56450	PBG1	AT1G56450.1	3UTR	0.1845	107.5847812
1_21144278	+	T	2.46398	yes	AT1G56450	PBG1	AT1G56450.1	3UTR	0.3358	107.5847812
1_21144279	+	T	0.774188	no	AT1G56450	PBG1	AT1G56450.1	3UTR	0.3395	107.5847812
1_21144291	+	T	1.6538	yes	AT1G56450	PBG1	AT1G56450.1	3UTR	0.3838	107.5847812
1_21144292	+	G	1.6538	no	AT1G56450	PBG1	AT1G56450.1	3UTR	0.3875	107.5847812
1_21144298	+	T	0.522405	no	AT1G56450	PBG1	AT1G56450.1	3UTR	0.4096	107.5847812
1_21144299	+	T	1.90076	no	AT1G56450	PBG1	AT1G56450.1	3UTR	0.4133	107.5847812
1_21144300	+	C	3.98558	yes	AT1G56450	PBG1	AT1G56450.1	3UTR	0.417	107.5847812
1_21144301	+	T	3.45639	no	AT1G56450	PBG1	AT1G56450.1	3UTR	0.4207	107.5847812
1_21144302	+	T	0.7926	no	AT1G56450	PBG1	AT1G56450.1	3UTR	0.4244	107.5847812
1_21144335	+	T	0.758879	no	AT1G56450	PBG1	AT1G56450.1	3UTR	0.5461	107.5847812
1_21144336	+	T	2.17952	yes	AT1G56450	PBG1	AT1G56450.1	3UTR	0.5498	107.5847812
1_21144337	+	A	0.921853	no	AT1G56450	PBG1	AT1G56450.1	3UTR	0.5535	107.5847812
1_21257650	+	A	0.599577	yes	AT1G56700	AT1G56700	AT1G56700.1,AT1G56700.4,AT1G56700.2,AT1G56700.3	3UTR,3UTR,3UTR,3UTR	0.0271,0.0271,0.0271,0.0271	72.5369689,0.9421111,0.3434188,0.0622607
1_21257677	+	T	3.37185	yes	AT1G56700	AT1G56700	AT1G56700.1,AT1G56700.4,AT1G56700.2,AT1G56700.3	3UTR,3UTR,3UTR,3UTR	0.1084,0.1084,0.1084,0.1084	72.5369689,0.9421111,0.3434188,0.0622607
1_21257678	+	G	0.418003	no	AT1G56700	AT1G56700	AT1G56700.1,AT1G56700.4,AT1G56700.2,AT1G56700.3	3UTR,3UTR,3UTR,3UTR	0.1114,0.1114,0.1114,0.1114	72.5369689,0.9421111,0.3434188,0.0622607
1_21257679	+	C	0.533143	no	AT1G56700	AT1G56700	AT1G56700.1,AT1G56700.4,AT1G56700.2,AT1G56700.3	3UTR,3UTR,3UTR,3UTR	0.1145,0.1145,0.1145,0.1145	72.5369689,0.9421111,0.3434188,0.0622607
1_21257689	+	C	2.48705	yes	AT1G56700	AT1G56700	AT1G56700.1,AT1G56700.4,AT1G56700.2,AT1G56700.3	3UTR,3UTR,3UTR,3UTR	0.1446,0.1446,0.1446,0.1446	72.5369689,0.9421111,0.3434188,0.0622607
1_21356383	+	C	3.13419	yes	AT1G57660	RPL21F	AT1G57660.1	3UTR	0.0662	545.201397
1_21356427	+	T	4.6455	no	AT1G57660	RPL21F	AT1G57660.1	3UTR	0.2279	545.201397
1_21356428	+	T	5.16304	yes	AT1G57660	RPL21F	AT1G57660.1	3UTR	0.2316	545.201397
1_21356429	+	T	0.614976	no	AT1G57660	RPL21F	AT1G57660.1	3UTR	0.2353	545.201397
1_21356430	+	G	3.02205	no	AT1G57660	RPL21F	AT1G57660.1	3UTR	0.239	545.201397
1_21356431	+	T	2.60443	no	AT1G57660	RPL21F	AT1G57660.1	3UTR	0.2426	545.201397
1_21356432	+	A	1.86572	no	AT1G57660	RPL21F	AT1G57660.1	3UTR	0.2463	545.201397
1_21356433	+	T	3.63483	no	AT1G57660	RPL21F	AT1G57660.1	3UTR	0.25	545.201397
1_21356434	+	C	2.45094	no	AT1G57660	RPL21F	AT1G57660.1	3UTR	0.2537	545.201397
1_21356447	+	T	2.01804	no	AT1G57660	RPL21F	AT1G57660.1	3UTR	0.3015	545.201397
1_21356448	+	T	1.6924	no	AT1G57660	RPL21F	AT1G57660.1	3UTR	0.3051	545.201397
1_21356449	+	T	4.31005	no	AT1G57660	RPL21F	AT1G57660.1	3UTR	0.3088	545.201397
1_21356450	+	C	5.68491	yes	AT1G57660	RPL21F	AT1G57660.1	3UTR	0.3125	545.201397
1_21356451	+	T	1.55689	no	AT1G57660	RPL21F	AT1G57660.1	3UTR	0.3162	545.201397
1_21356452	+	A	1.67789	no	AT1G57660	RPL21F	AT1G57660.1	3UTR	0.3199	545.201397
1_21380189	+	T	8.06706	yes	AT1G57720	AT1G57720	AT1G57720.1,AT1G57720.2	3UTR,3UTR	0.2803,0.2772	165.6912051,92.3063062
1_21380198	+	G	2.09597	no	AT1G57720	AT1G57720	AT1G57720.1,AT1G57720.2	3UTR,3UTR	0.3144,0.3109	165.6912051,92.3063062
1_21380199	+	T	3.8506	yes	AT1G57720	AT1G57720	AT1G57720.1,AT1G57720.2	3UTR,3UTR	0.3182,0.3146	165.6912051,92.3063062
1_21380200	+	A	3.60941	no	AT1G57720	AT1G57720	AT1G57720.1,AT1G57720.2	3UTR,3UTR	0.322,0.3184	165.6912051,92.3063062
1_21380235	+	T	7.6113	yes	AT1G57720	AT1G57720	AT1G57720.1,AT1G57720.2	3UTR,3UTR	0.4545,0.4494	165.6912051,92.3063062
1_21380244	+	A	5.09668	no	AT1G57720	AT1G57720	AT1G57720.1,AT1G57720.2	3UTR,3UTR	0.4886,0.4831	165.6912051,92.3063062
1_21380245	+	A	3.53731	no	AT1G57720	AT1G57720	AT1G57720.1,AT1G57720.2	3UTR,3UTR	0.4924,0.4869	165.6912051,92.3063062
1_21380246	+	T	6.5285	no	AT1G57720	AT1G57720	AT1G57720.1,AT1G57720.2	3UTR,3UTR	0.4962,0.4906	165.6912051,92.3063062
1_21380247	+	A	12.3245	yes	AT1G57720	AT1G57720	AT1G57720.1,AT1G57720.2	3UTR,3UTR	0.5,0.4944	165.6912051,92.3063062
1_21380250	+	G	2.04054	no	AT1G57720	AT1G57720	AT1G57720.1,AT1G57720.2	3UTR,3UTR	0.5114,0.5056	165.6912051,92.3063062
1_21380251	+	T	3.4366	yes	AT1G57720	AT1G57720	AT1G57720.1,AT1G57720.2	3UTR,3UTR	0.5152,0.5094	165.6912051,92.3063062
1_21380253	+	C	1.38816	no	AT1G57720	AT1G57720	AT1G57720.1,AT1G57720.2	3UTR,3UTR	0.5227,0.5169	165.6912051,92.3063062
1_21380254	+	T	22.8055	yes	AT1G57720	AT1G57720	AT1G57720.1,AT1G57720.2	3UTR,3UTR	0.5265,0.5206	165.6912051,92.3063062
1_21380255	+	T	2.31304	no	AT1G57720	AT1G57720	AT1G57720.1,AT1G57720.2	3UTR,3UTR	0.5303,0.5243	165.6912051,92.3063062
1_21394905	+	C	2.56653	yes	AT1G57765	AT1G57765	AT1G57765.1,AT1G57765.2	3UTR,3UTR	0.722,0.7782	24.1081602,0
1_21900843	+	T	0.555452	yes	AT1G59610	DRP2B	AT1G59610.1	3UTR	0.2033	36.4707101
1_21900884	+	T	0.599576	yes	AT1G59610	DRP2B	AT1G59610.1	3UTR	0.3377	36.4707101
1_21900964	+	A	0.290202	yes	AT1G59610	DRP2B	AT1G59610.1	3UTR	0.6	36.4707101
1_22053779	+	T	5.58045	yes	AT1G59900	E1 ALPHA	AT1G59900.1	3UTR	0.5268	86.1757563
1_22053780	+	T	1.97536	no	AT1G59900	E1 ALPHA	AT1G59900.1	3UTR	0.5312	86.1757563
1_22053800	+	T	0.12622	yes	AT1G59900	E1 ALPHA	AT1G59900.1	3UTR	0.6205	86.1757563
1_22445117	+	T	0.0312274	yes	AT1G60950	FD2	AT1G60950.1	3UTR	0.3763	1087.6590991
1_22445133	+	T	0.020001	yes	AT1G60950	FD2	AT1G60950.1	3UTR	0.4337	1087.6590991
1_22544535	+	T	2.35492	yes	AT1G61150	AT1G61150	AT1G61150.6,AT1G61150.5,AT1G61150.1,AT1G61150.10,AT1G61150.4,AT1G61150.2,AT1G61150.3,AT1G61150.11,AT1G61150.9,AT1G61150.7,AT1G61150.8	3UTR,3UTR,3UTR,3UTR,3UTR,3UTR,3UTR,3UTR,3UTR,3UTR,3UTR	0.5457,0.6215,0.1372,0.4409,0.1372,0.4409,0.6215,0.4409,0.1372,0.6215,0.1482	14.4108836,14.2880876,5.364255,2.2484637,1.4947496,1.4107213,0.7389875,0.5960446,0.263825,0.1692431,0.0829392
1_22588710	+	T	0.17931	yes	AT1G61250	SCAMP3	AT1G61250.1	3UTR	0.1807	66.9748821
1_22588716	+	T	2.69032	no	AT1G61250	SCAMP3	AT1G61250.1	3UTR	0.2048	66.9748821
1_22588717	+	T	3.90161	yes	AT1G61250	SCAMP3	AT1G61250.1	3UTR	0.2088	66.9748821
1_22588799	+	T	1.59484	yes	AT1G61250	SCAMP3	AT1G61250.1,AT1G61250.2	3UTR,3UTR	0.5382,0.2946	66.9748821,0.0433372
1_22701194	+	T	6.65955	yes	AT1G61520	LHCA3	AT1G61520.1,AT1G61520.2	3UTR,3UTR	0.1679,0.1888	1702.6796165,8.4450401
1_22701195	+	A	4.68419	no	AT1G61520	LHCA3	AT1G61520.1,AT1G61520.2	3UTR,3UTR	0.1718,0.1931	1702.6796165,8.4450401
1_22701196	+	T	4.54941	no	AT1G61520	LHCA3	AT1G61520.1,AT1G61520.2	3UTR,3UTR	0.1756,0.1974	1702.6796165,8.4450401
1_22701197	+	T	4.62514	no	AT1G61520	LHCA3	AT1G61520.1,AT1G61520.2	3UTR,3UTR	0.1794,0.2017	1702.6796165,8.4450401
1_22701198	+	T	5.61206	no	AT1G61520	LHCA3	AT1G61520.1,AT1G61520.2	3UTR,3UTR	0.1832,0.206	1702.6796165,8.4450401
1_22701199	+	C	0.103704	no	AT1G61520	LHCA3	AT1G61520.1,AT1G61520.2	3UTR,3UTR	0.187,0.2103	1702.6796165,8.4450401
1_22701201	+	A	0.362051	yes	AT1G61520	LHCA3	AT1G61520.1,AT1G61520.2	3UTR,3UTR	0.1947,0.2189	1702.6796165,8.4450401
1_22701205	+	T	2.53972	yes	AT1G61520	LHCA3	AT1G61520.1,AT1G61520.2	3UTR,3UTR	0.2099,0.2361	1702.6796165,8.4450401
1_22701221	+	T	1.78365	yes	AT1G61520	LHCA3	AT1G61520.1,AT1G61520.2	3UTR,3UTR	0.271,0.3047	1702.6796165,8.4450401
1_22701227	+	T	2.57616	yes	AT1G61520	LHCA3	AT1G61520.1,AT1G61520.2	3UTR,3UTR	0.2939,0.3305	1702.6796165,8.4450401
1_22701228	+	A	2.56389	no	AT1G61520	LHCA3	AT1G61520.1,AT1G61520.2	3UTR,3UTR	0.2977,0.3348	1702.6796165,8.4450401
1_22701231	+	G	5.82927	yes	AT1G61520	LHCA3	AT1G61520.1,AT1G61520.2	3UTR,3UTR	0.3092,0.3476	1702.6796165,8.4450401
1_22701232	+	T	2.97436	no	AT1G61520	LHCA3	AT1G61520.1,AT1G61520.2	3UTR,3UTR	0.313,0.3519	1702.6796165,8.4450401
1_22701233	+	A	1.29266	no	AT1G61520	LHCA3	AT1G61520.1,AT1G61520.2	3UTR,3UTR	0.3168,0.3562	1702.6796165,8.4450401
1_22701238	+	C	0.37303	no	AT1G61520	LHCA3	AT1G61520.1,AT1G61520.2	3UTR,3UTR	0.3359,0.3777	1702.6796165,8.4450401
1_22701239	+	C	5.93316	yes	AT1G61520	LHCA3	AT1G61520.1,AT1G61520.2	3UTR,3UTR	0.3397,0.382	1702.6796165,8.4450401
1_22701256	+	T	0.890486	yes	AT1G61520	LHCA3	AT1G61520.1,AT1G61520.2	3UTR,3UTR	0.4046,0.4549	1702.6796165,8.4450401
1_22701260	+	T	11.3043	no	AT1G61520	LHCA3	AT1G61520.1,AT1G61520.2	3UTR,3UTR	0.4198,0.4721	1702.6796165,8.4450401
1_22701261	+	T	3.12468	no	AT1G61520	LHCA3	AT1G61520.1,AT1G61520.2	3UTR,3UTR	0.4237,0.4764	1702.6796165,8.4450401
1_22701262	+	G	35.9987	yes	AT1G61520	LHCA3	AT1G61520.1,AT1G61520.2	3UTR,3UTR	0.4275,0.4807	1702.6796165,8.4450401
1_22701263	+	T	5.4	no	AT1G61520	LHCA3	AT1G61520.1,AT1G61520.2	3UTR,3UTR	0.4313,0.485	1702.6796165,8.4450401
1_22701265	+	A	0.498088	no	AT1G61520	LHCA3	AT1G61520.1,AT1G61520.2	3UTR,3UTR	0.4389,0.4936	1702.6796165,8.4450401
1_22701266	+	G	2.86206	no	AT1G61520	LHCA3	AT1G61520.1,AT1G61520.2	3UTR,3UTR	0.4427,0.4979	1702.6796165,8.4450401
1_22701267	+	A	1.31666	no	AT1G61520	LHCA3	AT1G61520.1,AT1G61520.2	3UTR,3UTR	0.4466,0.5021	1702.6796165,8.4450401
1_22701268	+	A	7.66855	yes	AT1G61520	LHCA3	AT1G61520.1,AT1G61520.2	3UTR,3UTR	0.4504,0.5064	1702.6796165,8.4450401
1_22701269	+	A	3.3092	no	AT1G61520	LHCA3	AT1G61520.1,AT1G61520.2	3UTR,3UTR	0.4542,0.5107	1702.6796165,8.4450401
1_22701270	+	T	1.33243	no	AT1G61520	LHCA3	AT1G61520.1,AT1G61520.2	3UTR,3UTR	0.458,0.515	1702.6796165,8.4450401
1_22701271	+	G	3.61412	no	AT1G61520	LHCA3	AT1G61520.1,AT1G61520.2	3UTR,3UTR	0.4618,0.5193	1702.6796165,8.4450401
1_22739310	+	T	4.07622	yes	AT1G61620	AT1G61620	AT1G61620.1	3UTR	0.4292	34.4402422
1_22812421	+	G	0.505058	yes	AT1G61770	C50	AT1G61770.1	3UTR	0.1634	36.289233
1_22812431	+	T	4.11966	yes	AT1G61770	C50	AT1G61770.1	3UTR	0.1961	36.289233
1_22812432	+	T	2.06601	no	AT1G61770	C50	AT1G61770.1	3UTR	0.1993	36.289233
1_22812480	+	A	0.491342	yes	AT1G61770	C50	AT1G61770.1	3UTR	0.3562	36.289233
1_22812495	+	A	0.51872	yes	AT1G61770	C50	AT1G61770.1	3UTR	0.4052	36.289233
1_22815472	+	T	0.478791	yes	AT1G61790	OST3B	AT1G61790.1	3UTR	0.0565	19.1520108
1_22815473	+	T	0.417553	no	AT1G61790	OST3B	AT1G61790.1	3UTR	0.0579	19.1520108
1_22815546	+	T	0.161777	yes	AT1G61790	OST3B	AT1G61790.1	3UTR	0.1584	19.1520108
1_22815557	+	G	1.45576	no	AT1G61790	OST3B	AT1G61790.1	3UTR	0.1736	19.1520108
1_22815558	+	T	3.42366	yes	AT1G61790	OST3B	AT1G61790.1	3UTR	0.1749	19.1520108
1_22815578	+	G	0.839135	no	AT1G61790	OST3B	AT1G61790.1	3UTR	0.2025	19.1520108
1_22815579	+	T	1.28271	no	AT1G61790	OST3B	AT1G61790.1	3UTR	0.2039	19.1520108
1_22815580	+	T	2.51792	yes	AT1G61790	OST3B	AT1G61790.1	3UTR	0.2052	19.1520108
1_22934290	+	T	0.0856096	yes	AT1G62040	ATG8C	AT1G62040.1,AT1G62040.2	3UTR,3UTR	0.1935,0.501	27.8716118,0.2121074
1_22934303	+	T	0.902774	yes	AT1G62040	ATG8C	AT1G62040.1,AT1G62040.2	3UTR,3UTR	0.2634,0.526	27.8716118,0.2121074
1_22934310	+	C	0.665472	yes	AT1G62040	ATG8C	AT1G62040.1,AT1G62040.2	3UTR,3UTR	0.3011,0.5395	27.8716118,0.2121074
1_23233417	+	T	0.17764	no	AT1G62740	HOP2	AT1G62740.1	3UTR	0.2222	35.8438816
1_23233418	+	T	1.70291	yes	AT1G62740	HOP2	AT1G62740.1	3UTR	0.2284	35.8438816
1_23233425	+	T	2.37815	no	AT1G62740	HOP2	AT1G62740.1	3UTR	0.2716	35.8438816
1_23233426	+	T	4.3451	no	AT1G62740	HOP2	AT1G62740.1	3UTR	0.2778	35.8438816
1_23233427	+	A	8.6902	yes	AT1G62740	HOP2	AT1G62740.1	3UTR	0.284	35.8438816
1_23733713	+	T	0.601482	yes	AT1G63940	MDAR6	AT1G63940.1,AT1G63940.2,AT1G63940.3,AT1G63940.4	3UTR,3UTR,3UTR,3UTR	0.4208,0.4055,0.6247,0.4986	127.0958624,41.2198899,1.506355,0.9157358
1_23743121	+	T	1.92196	yes	AT1G63980	AT1G63980	AT1G63980.1,AT1G63980.2	3UTR,3UTR	0.2672,0.2672	36.8143381,1.6868695
1_23743150	+	C	1.64372	yes	AT1G63980	AT1G63980	AT1G63980.1,AT1G63980.2	3UTR,3UTR	0.3846,0.3846	36.8143381,1.6868695
1_23743197	+	T	0.600473	yes	AT1G63980	AT1G63980	AT1G63980.1,AT1G63980.2	3UTR,3UTR	0.5749,0.5749	36.8143381,1.6868695
1_23743215	+	G	0.434643	yes	AT1G63980	AT1G63980	AT1G63980.1,AT1G63980.2	3UTR,3UTR	0.6478,0.6478	36.8143381,1.6868695
1_23743221	+	A	1.62821	yes	AT1G63980	AT1G63980	AT1G63980.1,AT1G63980.2	3UTR,3UTR	0.6721,0.6721	36.8143381,1.6868695
1_23790698	+	A	0.218119	yes	AT1G64090	RTNLB3	AT1G64090.1,AT1G64090.2	3UTR,3UTR	0.0501,0.0543	112.808883,0.0051115
1_23790739	+	T	0.439278	no	AT1G64090	RTNLB3	AT1G64090.1,AT1G64090.2	3UTR,3UTR	0.1234,0.1337	112.808883,0.0051115
1_23790740	+	G	3.53482	no	AT1G64090	RTNLB3	AT1G64090.1,AT1G64090.2	3UTR,3UTR	0.1252,0.1357	112.808883,0.0051115
1_23790741	+	T	10.1715	yes	AT1G64090	RTNLB3	AT1G64090.1,AT1G64090.2	3UTR,3UTR	0.127,0.1376	112.808883,0.0051115
1_23790742	+	T	1.19012	no	AT1G64090	RTNLB3	AT1G64090.1,AT1G64090.2	3UTR,3UTR	0.1288,0.1395	112.808883,0.0051115
1_23790743	+	T	1.10766	no	AT1G64090	RTNLB3	AT1G64090.1,AT1G64090.2	3UTR,3UTR	0.1306,0.1415	112.808883,0.0051115
1_23790744	+	T	2.8943	no	AT1G64090	RTNLB3	AT1G64090.1,AT1G64090.2	3UTR,3UTR	0.1324,0.1434	112.808883,0.0051115
1_23790745	+	T	1.96744	no	AT1G64090	RTNLB3	AT1G64090.1,AT1G64090.2	3UTR,3UTR	0.1342,0.1453	112.808883,0.0051115
1_23790746	+	T	4.88469	no	AT1G64090	RTNLB3	AT1G64090.1,AT1G64090.2	3UTR,3UTR	0.136,0.1473	112.808883,0.0051115
1_23790748	+	G	1.17782	no	AT1G64090	RTNLB3	AT1G64090.1,AT1G64090.2	3UTR,3UTR	0.1395,0.1512	112.808883,0.0051115
1_23790749	+	G	9.16273	yes	AT1G64090	RTNLB3	AT1G64090.1,AT1G64090.2	3UTR,3UTR	0.1413,0.1531	112.808883,0.0051115
1_23790790	+	T	7.33894	yes	AT1G64090	RTNLB3	AT1G64090.1,AT1G64090.2	3UTR,3UTR	0.2147,0.2326	112.808883,0.0051115
1_23790791	+	A	0.908903	no	AT1G64090	RTNLB3	AT1G64090.1,AT1G64090.2	3UTR,3UTR	0.2165,0.2345	112.808883,0.0051115
1_23790794	+	G	2.29933	no	AT1G64090	RTNLB3	AT1G64090.1,AT1G64090.2	3UTR,3UTR	0.2218,0.2403	112.808883,0.0051115
1_23790795	+	A	3.1568	no	AT1G64090	RTNLB3	AT1G64090.1,AT1G64090.2	3UTR,3UTR	0.2236,0.2422	112.808883,0.0051115
1_23790796	+	T	10.1505	no	AT1G64090	RTNLB3	AT1G64090.1,AT1G64090.2	3UTR,3UTR	0.2254,0.2442	112.808883,0.0051115
1_23790797	+	T	10.396	yes	AT1G64090	RTNLB3	AT1G64090.1,AT1G64090.2	3UTR,3UTR	0.2272,0.2461	112.808883,0.0051115
1_23790798	+	T	0.722456	no	AT1G64090	RTNLB3	AT1G64090.1,AT1G64090.2	3UTR,3UTR	0.229,0.2481	112.808883,0.0051115
1_23790799	+	T	8.72775	no	AT1G64090	RTNLB3	AT1G64090.1,AT1G64090.2	3UTR,3UTR	0.2308,0.25	112.808883,0.0051115
1_23790800	+	A	7.78886	no	AT1G64090	RTNLB3	AT1G64090.1,AT1G64090.2	3UTR,3UTR	0.2326,0.2519	112.808883,0.0051115
1_23833568	+	C	7.08209	yes	AT1G64230	UBC28	AT1G64230.1,AT1G64230.2,AT1G64230.5,AT1G64230.3,AT1G64230.4	5UTR,5UTR,5UTR,5UTR,5UTR	0.4462,0,0.1417,0.1417,0.0463	314.9533871,2.0020331,0.7979778,0.1555146,0.0594046
1_23833569	+	T	0.0410965	no	AT1G64230	UBC28	AT1G64230.1,AT1G64230.2,AT1G64230.5,AT1G64230.3,AT1G64230.4	5UTR,5UTR,5UTR,5UTR,5UTR	0.4516,0.0097,0.15,0.15,0.0556	314.9533871,2.0020331,0.7979778,0.1555146,0.0594046
1_23833575	+	T	3.18008	yes	AT1G64230	UBC28	AT1G64230.1,AT1G64230.2,AT1G64230.5,AT1G64230.3,AT1G64230.4	5UTR,5UTR,5UTR,5UTR,5UTR	0.4839,0.068,0.2,0.2,0.1111	314.9533871,2.0020331,0.7979778,0.1555146,0.0594046
1_23833577	+	T	14.1877	no	AT1G64230	UBC28	AT1G64230.1,AT1G64230.2,AT1G64230.5,AT1G64230.3,AT1G64230.4	5UTR,5UTR,5UTR,5UTR,5UTR	0.4946,0.0874,0.2167,0.2167,0.1296	314.9533871,2.0020331,0.7979778,0.1555146,0.0594046
1_23833578	+	T	3.93634	no	AT1G64230	UBC28	AT1G64230.1,AT1G64230.2,AT1G64230.5,AT1G64230.3,AT1G64230.4	5UTR,5UTR,5UTR,5UTR,5UTR	0.5,0.0971,0.225,0.225,0.1389	314.9533871,2.0020331,0.7979778,0.1555146,0.0594046
1_23833579	+	C	3.93629	no	AT1G64230	UBC28	AT1G64230.1,AT1G64230.2,AT1G64230.5,AT1G64230.3,AT1G64230.4	5UTR,5UTR,5UTR,5UTR,5UTR	0.5054,0.1068,0.2333,0.2333,0.1481	314.9533871,2.0020331,0.7979778,0.1555146,0.0594046
1_23833580	+	G	12.2628	no	AT1G64230	UBC28	AT1G64230.1,AT1G64230.2,AT1G64230.5,AT1G64230.3,AT1G64230.4	5UTR,5UTR,5UTR,5UTR,5UTR	0.5108,0.1165,0.2417,0.2417,0.1574	314.9533871,2.0020331,0.7979778,0.1555146,0.0594046
1_23833581	+	T	24.3393	yes	AT1G64230	UBC28	AT1G64230.1,AT1G64230.2,AT1G64230.5,AT1G64230.3,AT1G64230.4	5UTR,5UTR,5UTR,5UTR,5UTR	0.5161,0.1262,0.25,0.25,0.1667	314.9533871,2.0020331,0.7979778,0.1555146,0.0594046
1_23833582	+	T	6.73997	no	AT1G64230	UBC28	AT1G64230.1,AT1G64230.2,AT1G64230.5,AT1G64230.3,AT1G64230.4	5UTR,5UTR,5UTR,5UTR,5UTR	0.5215,0.1359,0.2583,0.2583,0.1759	314.9533871,2.0020331,0.7979778,0.1555146,0.0594046
1_23833584	+	G	0.52234	no	AT1G64230	UBC28	AT1G64230.1,AT1G64230.2,AT1G64230.5,AT1G64230.3,AT1G64230.4	5UTR,5UTR,5UTR,5UTR,5UTR	0.5323,0.1553,0.275,0.275,0.1944	314.9533871,2.0020331,0.7979778,0.1555146,0.0594046
1_23833585	+	G	8.45426	yes	AT1G64230	UBC28	AT1G64230.1,AT1G64230.2,AT1G64230.5,AT1G64230.3,AT1G64230.4	5UTR,5UTR,5UTR,5UTR,5UTR	0.5376,0.165,0.2833,0.2833,0.2037	314.9533871,2.0020331,0.7979778,0.1555146,0.0594046
1_23833586	+	T	4.19528	no	AT1G64230	UBC28	AT1G64230.1,AT1G64230.2,AT1G64230.5,AT1G64230.3,AT1G64230.4	5UTR,5UTR,5UTR,5UTR,5UTR	0.543,0.1748,0.2917,0.2917,0.213	314.9533871,2.0020331,0.7979778,0.1555146,0.0594046
1_23833587	+	C	7.28227	no	AT1G64230	UBC28	AT1G64230.1,AT1G64230.2,AT1G64230.5,AT1G64230.3,AT1G64230.4	5UTR,5UTR,5UTR,5UTR,5UTR	0.5484,0.1845,0.3,0.3,0.2222	314.9533871,2.0020331,0.7979778,0.1555146,0.0594046
1_23833588	+	T	7.43997	no	AT1G64230	UBC28	AT1G64230.1,AT1G64230.2,AT1G64230.5,AT1G64230.3,AT1G64230.4	5UTR,5UTR,5UTR,5UTR,5UTR	0.5538,0.1942,0.3083,0.3083,0.2315	314.9533871,2.0020331,0.7979778,0.1555146,0.0594046
1_23833589	+	C	1.18846	no	AT1G64230	UBC28	AT1G64230.1,AT1G64230.2,AT1G64230.5,AT1G64230.3,AT1G64230.4	5UTR,5UTR,5UTR,5UTR,5UTR	0.5591,0.2039,0.3167,0.3167,0.2407	314.9533871,2.0020331,0.7979778,0.1555146,0.0594046
1_23835151	+	T	0.0600142	yes	AT1G64230	UBC28	AT1G64230.1,AT1G64230.2,AT1G64230.5,AT1G64230.3,AT1G64230.4	CDS,CDS,CDS,CDS,CDS	0.5175,0.5175,0.5175,0.5175,0.5175	314.9533871,2.0020331,0.7979778,0.1555146,0.0594046
1_23835153	+	C	1.53055	yes	AT1G64230	UBC28	AT1G64230.1,AT1G64230.2,AT1G64230.5,AT1G64230.3,AT1G64230.4	CDS,CDS,CDS,CDS,CDS	0.5315,0.5315,0.5315,0.5315,0.5315	314.9533871,2.0020331,0.7979778,0.1555146,0.0594046
1_23835257	+	A	30.3948	no	AT1G64230	UBC28	AT1G64230.1,AT1G64230.2,AT1G64230.5,AT1G64230.3,AT1G64230.4	3UTR,3UTR,3UTR,3UTR,3UTR	0.1132,0.1143,0.1143,0.1143,0.1143	314.9533871,2.0020331,0.7979778,0.1555146,0.0594046
1_23835258	+	A	5.02359	no	AT1G64230	UBC28	AT1G64230.1,AT1G64230.2,AT1G64230.5,AT1G64230.3,AT1G64230.4	3UTR,3UTR,3UTR,3UTR,3UTR	0.1164,0.1175,0.1175,0.1175,0.1175	314.9533871,2.0020331,0.7979778,0.1555146,0.0594046
1_23835259	+	T	31.722	yes	AT1G64230	UBC28	AT1G64230.1,AT1G64230.2,AT1G64230.5,AT1G64230.3,AT1G64230.4	3UTR,3UTR,3UTR,3UTR,3UTR	0.1195,0.1206,0.1206,0.1206,0.1206	314.9533871,2.0020331,0.7979778,0.1555146,0.0594046
1_23835260	+	A	11.6344	no	AT1G64230	UBC28	AT1G64230.1,AT1G64230.2,AT1G64230.5,AT1G64230.3,AT1G64230.4	3UTR,3UTR,3UTR,3UTR,3UTR	0.1226,0.1238,0.1238,0.1238,0.1238	314.9533871,2.0020331,0.7979778,0.1555146,0.0594046
1_23835261	+	G	10.1647	no	AT1G64230	UBC28	AT1G64230.1,AT1G64230.2,AT1G64230.5,AT1G64230.3,AT1G64230.4	3UTR,3UTR,3UTR,3UTR,3UTR	0.1258,0.127,0.127,0.127,0.127	314.9533871,2.0020331,0.7979778,0.1555146,0.0594046
1_23835332	+	T	14.066	yes	AT1G64230	UBC28	AT1G64230.1,AT1G64230.2,AT1G64230.5,AT1G64230.3,AT1G64230.4	3UTR,3UTR,3UTR,3UTR,3UTR	0.3491,0.3524,0.3524,0.3524,0.3524	314.9533871,2.0020331,0.7979778,0.1555146,0.0594046
1_23835333	+	T	3.32125	no	AT1G64230	UBC28	AT1G64230.1,AT1G64230.2,AT1G64230.5,AT1G64230.3,AT1G64230.4	3UTR,3UTR,3UTR,3UTR,3UTR	0.3522,0.3556,0.3556,0.3556,0.3556	314.9533871,2.0020331,0.7979778,0.1555146,0.0594046
1_23835336	+	T	16.3173	yes	AT1G64230	UBC28	AT1G64230.1,AT1G64230.2,AT1G64230.5,AT1G64230.3,AT1G64230.4	3UTR,3UTR,3UTR,3UTR,3UTR	0.3616,0.3651,0.3651,0.3651,0.3651	314.9533871,2.0020331,0.7979778,0.1555146,0.0594046
1_23835337	+	C	14.3587	no	AT1G64230	UBC28	AT1G64230.1,AT1G64230.2,AT1G64230.5,AT1G64230.3,AT1G64230.4	3UTR,3UTR,3UTR,3UTR,3UTR	0.3648,0.3683,0.3683,0.3683,0.3683	314.9533871,2.0020331,0.7979778,0.1555146,0.0594046
1_23835338	+	A	9.56984	no	AT1G64230	UBC28	AT1G64230.1,AT1G64230.2,AT1G64230.5,AT1G64230.3,AT1G64230.4	3UTR,3UTR,3UTR,3UTR,3UTR	0.3679,0.3714,0.3714,0.3714,0.3714	314.9533871,2.0020331,0.7979778,0.1555146,0.0594046
1_23835340	+	C	21.3456	yes	AT1G64230	UBC28	AT1G64230.1,AT1G64230.2,AT1G64230.5,AT1G64230.3,AT1G64230.4	3UTR,3UTR,3UTR,3UTR,3UTR	0.3742,0.3778,0.3778,0.3778,0.3778	314.9533871,2.0020331,0.7979778,0.1555146,0.0594046
1_23835341	+	T	9.04257	no	AT1G64230	UBC28	AT1G64230.1,AT1G64230.2,AT1G64230.5,AT1G64230.3,AT1G64230.4	3UTR,3UTR,3UTR,3UTR,3UTR	0.3774,0.381,0.381,0.381,0.381	314.9533871,2.0020331,0.7979778,0.1555146,0.0594046
1_23835342	+	C	0.893481	no	AT1G64230	UBC28	AT1G64230.1,AT1G64230.2,AT1G64230.5,AT1G64230.3,AT1G64230.4	3UTR,3UTR,3UTR,3UTR,3UTR	0.3805,0.3841,0.3841,0.3841,0.3841	314.9533871,2.0020331,0.7979778,0.1555146,0.0594046
1_23835343	+	T	4.05689	no	AT1G64230	UBC28	AT1G64230.1,AT1G64230.2,AT1G64230.5,AT1G64230.3,AT1G64230.4	3UTR,3UTR,3UTR,3UTR,3UTR	0.3836,0.3873,0.3873,0.3873,0.3873	314.9533871,2.0020331,0.7979778,0.1555146,0.0594046
1_23835344	+	T	14.0399	no	AT1G64230	UBC28	AT1G64230.1,AT1G64230.2,AT1G64230.5,AT1G64230.3,AT1G64230.4	3UTR,3UTR,3UTR,3UTR,3UTR	0.3868,0.3905,0.3905,0.3905,0.3905	314.9533871,2.0020331,0.7979778,0.1555146,0.0594046
1_23835345	+	T	6.00409	no	AT1G64230	UBC28	AT1G64230.1,AT1G64230.2,AT1G64230.5,AT1G64230.3,AT1G64230.4	3UTR,3UTR,3UTR,3UTR,3UTR	0.3899,0.3937,0.3937,0.3937,0.3937	314.9533871,2.0020331,0.7979778,0.1555146,0.0594046
1_23835346	+	G	6.78105	no	AT1G64230	UBC28	AT1G64230.1,AT1G64230.2,AT1G64230.5,AT1G64230.3,AT1G64230.4	3UTR,3UTR,3UTR,3UTR,3UTR	0.3931,0.3968,0.3968,0.3968,0.3968	314.9533871,2.0020331,0.7979778,0.1555146,0.0594046
1_23835347	+	T	2.65513	no	AT1G64230	UBC28	AT1G64230.1,AT1G64230.2,AT1G64230.5,AT1G64230.3,AT1G64230.4	3UTR,3UTR,3UTR,3UTR,3UTR	0.3962,0.4,0.4,0.4,0.4	314.9533871,2.0020331,0.7979778,0.1555146,0.0594046
1_23835348	+	T	5.90943	no	AT1G64230	UBC28	AT1G64230.1,AT1G64230.2,AT1G64230.5,AT1G64230.3,AT1G64230.4	3UTR,3UTR,3UTR,3UTR,3UTR	0.3994,0.4032,0.4032,0.4032,0.4032	314.9533871,2.0020331,0.7979778,0.1555146,0.0594046
1_23835355	+	C	2.90347	no	AT1G64230	UBC28	AT1G64230.1,AT1G64230.2,AT1G64230.5,AT1G64230.3,AT1G64230.4	3UTR,3UTR,3UTR,3UTR,3UTR	0.4214,0.4254,0.4254,0.4254,0.4254	314.9533871,2.0020331,0.7979778,0.1555146,0.0594046
1_23835356	+	T	0.948263	no	AT1G64230	UBC28	AT1G64230.1,AT1G64230.2,AT1G64230.5,AT1G64230.3,AT1G64230.4	3UTR,3UTR,3UTR,3UTR,3UTR	0.4245,0.4286,0.4286,0.4286,0.4286	314.9533871,2.0020331,0.7979778,0.1555146,0.0594046
1_23835357	+	C	4.29844	no	AT1G64230	UBC28	AT1G64230.1,AT1G64230.2,AT1G64230.5,AT1G64230.3,AT1G64230.4	3UTR,3UTR,3UTR,3UTR,3UTR	0.4277,0.4317,0.4317,0.4317,0.4317	314.9533871,2.0020331,0.7979778,0.1555146,0.0594046
1_23835358	+	T	9.34811	no	AT1G64230	UBC28	AT1G64230.1,AT1G64230.2,AT1G64230.5,AT1G64230.3,AT1G64230.4	3UTR,3UTR,3UTR,3UTR,3UTR	0.4308,0.4349,0.4349,0.4349,0.4349	314.9533871,2.0020331,0.7979778,0.1555146,0.0594046
1_23835359	+	T	53.288	yes	AT1G64230	UBC28	AT1G64230.1,AT1G64230.2,AT1G64230.5,AT1G64230.3,AT1G64230.4	3UTR,3UTR,3UTR,3UTR,3UTR	0.434,0.4381,0.4381,0.4381,0.4381	314.9533871,2.0020331,0.7979778,0.1555146,0.0594046
1_23835360	+	T	10.0326	no	AT1G64230	UBC28	AT1G64230.1,AT1G64230.2,AT1G64230.5,AT1G64230.3,AT1G64230.4	3UTR,3UTR,3UTR,3UTR,3UTR	0.4371,0.4413,0.4413,0.4413,0.4413	314.9533871,2.0020331,0.7979778,0.1555146,0.0594046
1_23958159	+	A	2.1188	yes	AT1G64520	RPN12A	AT1G64520.1	3UTR	0.1118	152.21821
1_23958162	+	T	1.64662	yes	AT1G64520	RPN12A	AT1G64520.1	3UTR	0.1206	152.21821
1_23958193	+	T	1.6424	yes	AT1G64520	RPN12A	AT1G64520.1	3UTR	0.2118	152.21821
1_23958228	+	T	2.92263	yes	AT1G64520	RPN12A	AT1G64520.1	3UTR	0.3147	152.21821
1_23958231	+	T	4.53948	yes	AT1G64520	RPN12A	AT1G64520.1	3UTR	0.3235	152.21821
1_23958232	+	C	0.98069	no	AT1G64520	RPN12A	AT1G64520.1	3UTR	0.3265	152.21821
1_23973499	+	A	0.807502	yes	AT1G64550	ABCF3	AT1G64550.1	3UTR	0.5287	48.1366649
1_24037154	+	A	1.16401	yes	AT1G64680	AT1G64680	AT1G64680.1,AT1G64680.2	3UTR,3UTR	0.2486,0.3634	49.9836425,1.5210959
1_24037195	+	T	2.18143	yes	AT1G64680	AT1G64680	AT1G64680.1,AT1G64680.2	3UTR,3UTR	0.3607,0.4691	49.9836425,1.5210959
1_24037211	+	T	0.220981	yes	AT1G64680	AT1G64680	AT1G64680.1,AT1G64680.2	3UTR,3UTR	0.4044,0.5103	49.9836425,1.5210959
1_24037220	+	T	3.75604	yes	AT1G64680	AT1G64680	AT1G64680.1,AT1G64680.2	3UTR,3UTR	0.429,0.5335	49.9836425,1.5210959
1_24059469	+	C	0.849048	yes	AT1G64770	PNSB2	AT1G64770.1,AT1G64770.3	3UTR,3UTR	0.2585,0.4065	53.1787925,0.0043136
1_24059470	+	C	0.849048	no	AT1G64770	PNSB2	AT1G64770.1,AT1G64770.3	3UTR,3UTR	0.2634,0.4129	53.1787925,0.0043136
1_24100761	+	T	0.235661	yes	AT1G64860	SIGA	AT1G64860.1,AT1G64860.2	3UTR,3UTR	0.0628,0.1066	24.8253645,1.0123679
1_24100843	+	T	0.514865	yes	AT1G64860	SIGA	AT1G64860.1,AT1G64860.2	3UTR,3UTR	0.4305,0.5228	24.8253645,1.0123679
1_24100850	+	T	4.07458	no	AT1G64860	SIGA	AT1G64860.1,AT1G64860.2	3UTR,3UTR	0.4619,0.5584	24.8253645,1.0123679
1_24100851	+	T	2.7281	no	AT1G64860	SIGA	AT1G64860.1,AT1G64860.2	3UTR,3UTR	0.4664,0.5635	24.8253645,1.0123679
1_24100852	+	T	5.92978	yes	AT1G64860	SIGA	AT1G64860.1,AT1G64860.2	3UTR,3UTR	0.4709,0.5685	24.8253645,1.0123679
1_24230743	+	T	2.57568	yes	AT1G65230	AT1G65230	AT1G65230.1	CDS	0.7921	32.0076312
1_24230804	+	C	0.612865	yes	AT1G65230	AT1G65230	AT1G65230.1	3UTR	0.2847	32.0076312
1_24240446	+	T	2.82278	yes	AT1G65260	VIPP1	AT1G65260.1,AT1G65260.2	3UTR,3UTR	0.0569,0.0569	75.9632695,0.1474823
1_24240461	+	A	1.08031	yes	AT1G65260	VIPP1	AT1G65260.1,AT1G65260.2	3UTR,3UTR	0.107,0.107	75.9632695,0.1474823
1_24240480	+	C	4.46227	yes	AT1G65260	VIPP1	AT1G65260.1,AT1G65260.2	3UTR,3UTR	0.1706,0.1706	75.9632695,0.1474823
1_24240524	+	T	2.8031	yes	AT1G65260	VIPP1	AT1G65260.1,AT1G65260.2	3UTR,3UTR	0.3177,0.3177	75.9632695,0.1474823
1_24240557	+	A	4.39409	yes	AT1G65260	VIPP1	AT1G65260.1,AT1G65260.2	3UTR,3UTR	0.4281,0.4281	75.9632695,0.1474823
1_24240566	+	T	0.534163	no	AT1G65260	VIPP1	AT1G65260.1,AT1G65260.2	3UTR,3UTR	0.4582,0.4582	75.9632695,0.1474823
1_24240567	+	T	2.20063	yes	AT1G65260	VIPP1	AT1G65260.1,AT1G65260.2	3UTR,3UTR	0.4615,0.4615	75.9632695,0.1474823
1_24240639	+	T	1.54996	yes	AT1G65260	VIPP1	AT1G65260.1,AT1G65260.2	3UTR,3UTR	0.7023,0.7023	75.9632695,0.1474823
1_24244874	+	T	0.110821	no	AT1G65270	AT1G65270	AT1G65270.1,AT1G65270.2,AT1G65270.3	3UTR,3UTR,3UTR	0.2832,0.6485,0.5327	46.6945423,21.0447143,8.3967344
1_24244875	+	T	0.476181	yes	AT1G65270	AT1G65270	AT1G65270.1,AT1G65270.2,AT1G65270.3	3UTR,3UTR,3UTR	0.2867,0.6503,0.535	46.6945423,21.0447143,8.3967344
1_24244942	+	T	0.691416	yes	AT1G65270	AT1G65270	AT1G65270.1,AT1G65270.2,AT1G65270.3	3UTR,3UTR,3UTR	0.5269,0.768,0.6916	46.6945423,21.0447143,8.3967344
1_24244948	+	G	0.701319	yes	AT1G65270	AT1G65270	AT1G65270.1,AT1G65270.2,AT1G65270.3	3UTR,3UTR,3UTR	0.5484,0.7786,0.7056	46.6945423,21.0447143,8.3967344
1_24486772	+	T	8.22071	yes	AT1G65820	AT1G65820	AT1G65820.1,AT1G65820.2,AT1G65820.3	3UTR,3UTR,3UTR	0.3284,0.4258,0.4258	340.7848995,0.0747763,0.0681246
1_24486773	+	T	0.385966	no	AT1G65820	AT1G65820	AT1G65820.1,AT1G65820.2,AT1G65820.3	3UTR,3UTR,3UTR	0.3321,0.4306,0.4306	340.7848995,0.0747763,0.0681246
1_24486788	+	T	0.331504	no	AT1G65820	AT1G65820	AT1G65820.1,AT1G65820.2,AT1G65820.3	3UTR,3UTR,3UTR	0.3875,0.5024,0.5024	340.7848995,0.0747763,0.0681246
1_24486789	+	T	12.2956	yes	AT1G65820	AT1G65820	AT1G65820.1,AT1G65820.2,AT1G65820.3	3UTR,3UTR,3UTR	0.3911,0.5072,0.5072	340.7848995,0.0747763,0.0681246
1_24486790	+	T	0.479251	no	AT1G65820	AT1G65820	AT1G65820.1,AT1G65820.2,AT1G65820.3	3UTR,3UTR,3UTR	0.3948,0.512,0.512	340.7848995,0.0747763,0.0681246
1_24486814	+	T	15.9483	yes	AT1G65820	AT1G65820	AT1G65820.1,AT1G65820.2,AT1G65820.3	3UTR,3UTR,3UTR	0.4834,0.6268,0.6268	340.7848995,0.0747763,0.0681246
1_24486818	+	T	0.608936	yes	AT1G65820	AT1G65820	AT1G65820.1,AT1G65820.2,AT1G65820.3	3UTR,3UTR,3UTR	0.4982,0.6459,0.6459	340.7848995,0.0747763,0.0681246
1_24486825	+	G	0.671825	yes	AT1G65820	AT1G65820	AT1G65820.1,AT1G65820.2,AT1G65820.3	3UTR,3UTR,3UTR	0.524,0.6794,0.6794	340.7848995,0.0747763,0.0681246
1_24486831	+	A	3.11559	no	AT1G65820	AT1G65820	AT1G65820.1,AT1G65820.2,AT1G65820.3	3UTR,3UTR,3UTR	0.5461,0.7081,0.7081	340.7848995,0.0747763,0.0681246
1_24486832	+	T	0.11482	no	AT1G65820	AT1G65820	AT1G65820.1,AT1G65820.2,AT1G65820.3	3UTR,3UTR,3UTR	0.5498,0.7129,0.7129	340.7848995,0.0747763,0.0681246
1_24486833	+	T	21.3231	yes	AT1G65820	AT1G65820	AT1G65820.1,AT1G65820.2,AT1G65820.3	3UTR,3UTR,3UTR	0.5535,0.7177,0.7177	340.7848995,0.0747763,0.0681246
1_24486834	+	T	13.6717	no	AT1G65820	AT1G65820	AT1G65820.1,AT1G65820.2,AT1G65820.3	3UTR,3UTR,3UTR	0.5572,0.7225,0.7225	340.7848995,0.0747763,0.0681246
1_24486835	+	C	8.63493	no	AT1G65820	AT1G65820	AT1G65820.1,AT1G65820.2,AT1G65820.3	3UTR,3UTR,3UTR	0.5609,0.7273,0.7273	340.7848995,0.0747763,0.0681246
1_24486836	+	A	9.3123	no	AT1G65820	AT1G65820	AT1G65820.1,AT1G65820.2,AT1G65820.3	3UTR,3UTR,3UTR	0.5646,0.7321,0.7321	340.7848995,0.0747763,0.0681246
1_24492820	+	C	2.38075	yes	AT1G65840	PAO4	AT1G65840.1	3UTR	0.2615	82.8307286
1_24492843	+	T	8.5242	yes	AT1G65840	PAO4	AT1G65840.1	3UTR	0.3276	82.8307286
1_24492844	+	T	3.84891	no	AT1G65840	PAO4	AT1G65840.1	3UTR	0.3305	82.8307286
1_24541977	+	G	0.327453	no	AT1G65930	CICDH	AT1G65930.1	3UTR	0.1353	356.0822223
1_24541978	+	A	9.53566	no	AT1G65930	CICDH	AT1G65930.1	3UTR	0.1365	356.0822223
1_24541979	+	T	11.8361	yes	AT1G65930	CICDH	AT1G65930.1	3UTR	0.1376	356.0822223
1_24541980	+	T	9.64813	no	AT1G65930	CICDH	AT1G65930.1	3UTR	0.1388	356.0822223
1_24541981	+	T	3.44038	no	AT1G65930	CICDH	AT1G65930.1	3UTR	0.14	356.0822223
1_24541982	+	G	11.5715	no	AT1G65930	CICDH	AT1G65930.1	3UTR	0.1412	356.0822223
1_24541983	+	T	1.74319	no	AT1G65930	CICDH	AT1G65930.1	3UTR	0.1424	356.0822223
1_24541984	+	T	5.6222	no	AT1G65930	CICDH	AT1G65930.1	3UTR	0.1435	356.0822223
1_24541998	+	T	0.16549	no	AT1G65930	CICDH	AT1G65930.1	3UTR	0.16	356.0822223
1_24541999	+	A	0.998804	no	AT1G65930	CICDH	AT1G65930.1	3UTR	0.1612	356.0822223
1_24542000	+	T	1.8982	no	AT1G65930	CICDH	AT1G65930.1	3UTR	0.1624	356.0822223
1_24542001	+	T	12.2388	yes	AT1G65930	CICDH	AT1G65930.1	3UTR	0.1635	356.0822223
1_24542002	+	T	8.83566	no	AT1G65930	CICDH	AT1G65930.1	3UTR	0.1647	356.0822223
1_24542009	+	T	4.30484	yes	AT1G65930	CICDH	AT1G65930.1	3UTR	0.1729	356.0822223
1_24542022	+	T	4.49075	yes	AT1G65930	CICDH	AT1G65930.1	3UTR	0.1882	356.0822223
1_24542029	+	T	0.337331	yes	AT1G65930	CICDH	AT1G65930.1	3UTR	0.1965	356.0822223
1_24557344	+	T	1.33721	yes	AT1G65960	GAD2	AT1G65960.2,AT1G65960.1	3UTR,3UTR	0.1891,0.5085	83.2768576,0.037614
1_24557347	+	T	3.89843	yes	AT1G65960	GAD2	AT1G65960.2,AT1G65960.1	3UTR,3UTR	0.1954,0.5254	83.2768576,0.037614
1_24557348	+	T	3.58515	no	AT1G65960	GAD2	AT1G65960.2,AT1G65960.1	3UTR,3UTR	0.1975,0.5311	83.2768576,0.037614
1_24557372	+	C	3.5674	no	AT1G65960	GAD2	AT1G65960.2,AT1G65960.1	3UTR,3UTR	0.2479,0.6667	83.2768576,0.037614
1_24557373	+	A	5.56671	yes	AT1G65960	GAD2	AT1G65960.2,AT1G65960.1	3UTR,3UTR	0.25,0.6723	83.2768576,0.037614
1_24557374	+	T	0.211303	no	AT1G65960	GAD2	AT1G65960.2,AT1G65960.1	3UTR,3UTR	0.2521,0.678	83.2768576,0.037614
1_24557384	+	T	0.527535	no	AT1G65960	GAD2	AT1G65960.2,AT1G65960.1	3UTR,3UTR	0.2731,0.7345	83.2768576,0.037614
1_24557385	+	T	1.46393	no	AT1G65960	GAD2	AT1G65960.2,AT1G65960.1	3UTR,3UTR	0.2752,0.7401	83.2768576,0.037614
1_24557386	+	G	4.58324	no	AT1G65960	GAD2	AT1G65960.2,AT1G65960.1	3UTR,3UTR	0.2773,0.7458	83.2768576,0.037614
1_24557387	+	T	3.21188	no	AT1G65960	GAD2	AT1G65960.2,AT1G65960.1	3UTR,3UTR	0.2794,0.7514	83.2768576,0.037614
1_24557388	+	T	5.32668	yes	AT1G65960	GAD2	AT1G65960.2,AT1G65960.1	3UTR,3UTR	0.2815,0.7571	83.2768576,0.037614
1_24557389	+	A	2.69046	no	AT1G65960	GAD2	AT1G65960.2,AT1G65960.1	3UTR,3UTR	0.2836,0.7627	83.2768576,0.037614
1_24557390	+	T	0.141174	no	AT1G65960	GAD2	AT1G65960.2,AT1G65960.1	3UTR,3UTR	0.2857,0.7684	83.2768576,0.037614
1_24557398	+	T	2.29924	yes	AT1G65960	GAD2	AT1G65960.2,AT1G65960.1	3UTR,3UTR	0.3025,0.8136	83.2768576,0.037614
1_24557414	+	T	4.40383	yes	AT1G65960	GAD2	AT1G65960.2,AT1G65960.1	3UTR,3UTR	0.3361,0.904	83.2768576,0.037614
1_24557415	+	A	2.08696	no	AT1G65960	GAD2	AT1G65960.2,AT1G65960.1	3UTR,3UTR	0.3382,0.9096	83.2768576,0.037614
1_24840511	+	T	1.07317	yes	AT1G66580	RPL10C	AT1G66580.1	3UTR	0.194	334.3787924
1_24840512	+	T	0.466754	no	AT1G66580	RPL10C	AT1G66580.1	3UTR	0.1967	334.3787924
1_24840523	+	T	1.84151	yes	AT1G66580	RPL10C	AT1G66580.1	3UTR	0.2268	334.3787924
1_24840538	+	C	3.59022	yes	AT1G66580	RPL10C	AT1G66580.1	3UTR	0.2678	334.3787924
1_24840541	+	G	4.84774	yes	AT1G66580	RPL10C	AT1G66580.1	3UTR	0.276	334.3787924
1_24840546	+	A	0.627434	yes	AT1G66580	RPL10C	AT1G66580.1	3UTR	0.2896	334.3787924
1_25236643	+	T	2.90539	no	AT1G67350	AT1G67350	AT1G67350.1,AT1G67350.2	3UTR,3UTR	0.1423,0.1423	215.2114123,27.6633207
1_25236644	+	T	1.74649	no	AT1G67350	AT1G67350	AT1G67350.1,AT1G67350.2	3UTR,3UTR	0.146,0.146	215.2114123,27.6633207
1_25236645	+	T	3.83116	yes	AT1G67350	AT1G67350	AT1G67350.1,AT1G67350.2	3UTR,3UTR	0.1496,0.1496	215.2114123,27.6633207
1_25236646	+	T	3.76383	no	AT1G67350	AT1G67350	AT1G67350.1,AT1G67350.2	3UTR,3UTR	0.1533,0.1533	215.2114123,27.6633207
1_25236652	+	T	3.08329	yes	AT1G67350	AT1G67350	AT1G67350.1,AT1G67350.2	3UTR,3UTR	0.1752,0.1752	215.2114123,27.6633207
1_25236653	+	A	2.16896	no	AT1G67350	AT1G67350	AT1G67350.1,AT1G67350.2	3UTR,3UTR	0.1788,0.1788	215.2114123,27.6633207
1_25236654	+	T	1.50108	no	AT1G67350	AT1G67350	AT1G67350.1,AT1G67350.2	3UTR,3UTR	0.1825,0.1825	215.2114123,27.6633207
1_25236655	+	T	0.701935	no	AT1G67350	AT1G67350	AT1G67350.1,AT1G67350.2	3UTR,3UTR	0.1861,0.1861	215.2114123,27.6633207
1_25236657	+	T	1.65767	yes	AT1G67350	AT1G67350	AT1G67350.1,AT1G67350.2	3UTR,3UTR	0.1934,0.1934	215.2114123,27.6633207
1_25236696	+	A	1.51999	yes	AT1G67350	AT1G67350	AT1G67350.1,AT1G67350.2	3UTR,3UTR	0.3358,0.3358	215.2114123,27.6633207
1_25236697	+	G	0.0526841	no	AT1G67350	AT1G67350	AT1G67350.1,AT1G67350.2	3UTR,3UTR	0.3394,0.3394	215.2114123,27.6633207
1_25236726	+	A	2.61928	yes	AT1G67350	AT1G67350	AT1G67350.1,AT1G67350.2	3UTR,3UTR	0.4453,0.4453	215.2114123,27.6633207
1_25236738	+	A	1.15721	no	AT1G67350	AT1G67350	AT1G67350.1,AT1G67350.2	3UTR,3UTR	0.4891,0.4891	215.2114123,27.6633207
1_25236739	+	A	1.16297	yes	AT1G67350	AT1G67350	AT1G67350.1,AT1G67350.2	3UTR,3UTR	0.4927,0.4927	215.2114123,27.6633207
1_25236745	+	T	5.99803	yes	AT1G67350	AT1G67350	AT1G67350.1,AT1G67350.2	3UTR,3UTR	0.5146,0.5146	215.2114123,27.6633207
1_25236749	+	G	2.55021	yes	AT1G67350	AT1G67350	AT1G67350.1,AT1G67350.2	3UTR,3UTR	0.5292,0.5292	215.2114123,27.6633207
1_25263685	+	T	31.209	yes	AT1G67430	RPL17B	AT1G67430.1,AT1G67430.2	3UTR,3UTR	0.2489,0.354	1040.3021773,0.1471768
1_25263686	+	T	12.4639	no	AT1G67430	RPL17B	AT1G67430.1,AT1G67430.2	3UTR,3UTR	0.2533,0.3602	1040.3021773,0.1471768
1_25263687	+	C	10.763	no	AT1G67430	RPL17B	AT1G67430.1,AT1G67430.2	3UTR,3UTR	0.2576,0.3665	1040.3021773,0.1471768
1_25263688	+	T	10.6941	no	AT1G67430	RPL17B	AT1G67430.1,AT1G67430.2	3UTR,3UTR	0.262,0.3727	1040.3021773,0.1471768
1_25263689	+	T	5.70291	no	AT1G67430	RPL17B	AT1G67430.1,AT1G67430.2	3UTR,3UTR	0.2664,0.3789	1040.3021773,0.1471768
1_25263690	+	T	10.8977	no	AT1G67430	RPL17B	AT1G67430.1,AT1G67430.2	3UTR,3UTR	0.2707,0.3851	1040.3021773,0.1471768
1_25263693	+	C	1.16876	yes	AT1G67430	RPL17B	AT1G67430.1,AT1G67430.2	3UTR,3UTR	0.2838,0.4037	1040.3021773,0.1471768
1_25263698	+	A	0.570212	yes	AT1G67430	RPL17B	AT1G67430.1,AT1G67430.2	3UTR,3UTR	0.3057,0.4348	1040.3021773,0.1471768
1_25263699	+	T	0.0244318	no	AT1G67430	RPL17B	AT1G67430.1,AT1G67430.2	3UTR,3UTR	0.31,0.441	1040.3021773,0.1471768
1_25263701	+	G	0.943201	no	AT1G67430	RPL17B	AT1G67430.1,AT1G67430.2	3UTR,3UTR	0.3188,0.4534	1040.3021773,0.1471768
1_25263702	+	T	15.4046	no	AT1G67430	RPL17B	AT1G67430.1,AT1G67430.2	3UTR,3UTR	0.3231,0.4596	1040.3021773,0.1471768
1_25263703	+	T	12.1112	no	AT1G67430	RPL17B	AT1G67430.1,AT1G67430.2	3UTR,3UTR	0.3275,0.4658	1040.3021773,0.1471768
1_25263704	+	T	1.08212	no	AT1G67430	RPL17B	AT1G67430.1,AT1G67430.2	3UTR,3UTR	0.3319,0.472	1040.3021773,0.1471768
1_25263705	+	T	1.08212	no	AT1G67430	RPL17B	AT1G67430.1,AT1G67430.2	3UTR,3UTR	0.3362,0.4783	1040.3021773,0.1471768
1_25263706	+	G	20.1836	yes	AT1G67430	RPL17B	AT1G67430.1,AT1G67430.2	3UTR,3UTR	0.3406,0.4845	1040.3021773,0.1471768
1_25263707	+	T	0.853138	no	AT1G67430	RPL17B	AT1G67430.1,AT1G67430.2	3UTR,3UTR	0.345,0.4907	1040.3021773,0.1471768
1_25263711	+	A	9.52148	yes	AT1G67430	RPL17B	AT1G67430.1,AT1G67430.2	3UTR,3UTR	0.3624,0.5155	1040.3021773,0.1471768
1_25263724	+	T	2.65606	no	AT1G67430	RPL17B	AT1G67430.1,AT1G67430.2	3UTR,3UTR	0.4192,0.5963	1040.3021773,0.1471768
1_25263725	+	T	8.22594	no	AT1G67430	RPL17B	AT1G67430.1,AT1G67430.2	3UTR,3UTR	0.4236,0.6025	1040.3021773,0.1471768
1_25263726	+	A	10.5813	yes	AT1G67430	RPL17B	AT1G67430.1,AT1G67430.2	3UTR,3UTR	0.4279,0.6087	1040.3021773,0.1471768
1_25263727	+	T	1.02554	no	AT1G67430	RPL17B	AT1G67430.1,AT1G67430.2	3UTR,3UTR	0.4323,0.6149	1040.3021773,0.1471768
1_25263732	+	G	0.217713	yes	AT1G67430	RPL17B	AT1G67430.1,AT1G67430.2	3UTR,3UTR	0.4541,0.646	1040.3021773,0.1471768
1_25263735	+	A	5.35653	no	AT1G67430	RPL17B	AT1G67430.1,AT1G67430.2	3UTR,3UTR	0.4672,0.6646	1040.3021773,0.1471768
1_25263736	+	T	2.60042	no	AT1G67430	RPL17B	AT1G67430.1,AT1G67430.2	3UTR,3UTR	0.4716,0.6708	1040.3021773,0.1471768
1_25263737	+	T	13.5085	no	AT1G67430	RPL17B	AT1G67430.1,AT1G67430.2	3UTR,3UTR	0.476,0.677	1040.3021773,0.1471768
1_25263738	+	T	25.2514	yes	AT1G67430	RPL17B	AT1G67430.1,AT1G67430.2	3UTR,3UTR	0.4803,0.6832	1040.3021773,0.1471768
1_25263742	+	T	3.41944	yes	AT1G67430	RPL17B	AT1G67430.1,AT1G67430.2	3UTR,3UTR	0.4978,0.7081	1040.3021773,0.1471768
1_25263752	+	T	0.27973	yes	AT1G67430	RPL17B	AT1G67430.1,AT1G67430.2	3UTR,3UTR	0.5415,0.7702	1040.3021773,0.1471768
1_25375922	+	C	0.839809	yes	AT1G67700	HHL1	AT1G67700.2,AT1G67700.1,AT1G67700.5,AT1G67700.4,AT1G67700.3	3UTR,3UTR,3UTR,3UTR,3UTR	0.4644,0.4797,0.4051,0.4199,0.5488	102.248076,96.8659101,0.7922736,0.6286494,0.6189854
1_25375967	+	A	5.11095	yes	AT1G67700	HHL1	AT1G67700.2,AT1G67700.1,AT1G67700.5,AT1G67700.4,AT1G67700.3	3UTR,3UTR,3UTR,3UTR,3UTR	0.6527,0.6626,0.5693,0.5801,0.7581	102.248076,96.8659101,0.7922736,0.6286494,0.6189854
1_25375974	+	T	0.493588	yes	AT1G67700	HHL1	AT1G67700.2,AT1G67700.1,AT1G67700.5,AT1G67700.4,AT1G67700.3	3UTR,3UTR,3UTR,3UTR,3UTR	0.682,0.6911,0.5949,0.605,0.7907	102.248076,96.8659101,0.7922736,0.6286494,0.6189854
1_25375982	+	T	2.38227	yes	AT1G67700	HHL1	AT1G67700.2,AT1G67700.1,AT1G67700.5,AT1G67700.4,AT1G67700.3	3UTR,3UTR,3UTR,3UTR,3UTR	0.7155,0.7236,0.6241,0.6335,0.8279	102.248076,96.8659101,0.7922736,0.6286494,0.6189854
1_25375990	+	A	0.689501	yes	AT1G67700	HHL1	AT1G67700.2,AT1G67700.1,AT1G67700.5,AT1G67700.4,AT1G67700.3	3UTR,3UTR,3UTR,3UTR,3UTR	0.749,0.7561,0.6533,0.6619,0.8651	102.248076,96.8659101,0.7922736,0.6286494,0.6189854
1_25393458	+	T	0.308325	yes	AT1G67730	KCR1	AT1G67730.1	3UTR	0.1759	67.8636307
1_25393480	+	T	2.12682	yes	AT1G67730	KCR1	AT1G67730.1	3UTR	0.218	67.8636307
1_25393485	+	A	0.258757	yes	AT1G67730	KCR1	AT1G67730.1	3UTR	0.2275	67.8636307
1_25393486	+	T	0.258757	no	AT1G67730	KCR1	AT1G67730.1	3UTR	0.2294	67.8636307
1_25393508	+	G	1.97344	yes	AT1G67730	KCR1	AT1G67730.1	3UTR	0.2715	67.8636307
1_25495718	+	G	0.518282	yes	AT1G68010	HPR	AT1G68010.1,AT1G68010.2	CDS,CDS	0.9091,0.9091	203.5896373,0.0164013
1_25495792	+	G	5.3874	no	AT1G68010	HPR	AT1G68010.1	3UTR	0.2139	203.5896373
1_25495793	+	T	6.68467	no	AT1G68010	HPR	AT1G68010.1	3UTR	0.2169	203.5896373
1_25495794	+	A	8.38152	no	AT1G68010	HPR	AT1G68010.1	3UTR	0.2199	203.5896373
1_25495795	+	T	6.46562	no	AT1G68010	HPR	AT1G68010.1	3UTR	0.2229	203.5896373
1_25495796	+	T	0.905258	no	AT1G68010	HPR	AT1G68010.1	3UTR	0.2259	203.5896373
1_25495797	+	G	1.3552	no	AT1G68010	HPR	AT1G68010.1	3UTR	0.2289	203.5896373
1_25495798	+	T	2.02653	no	AT1G68010	HPR	AT1G68010.1	3UTR	0.2319	203.5896373
1_25495799	+	A	15.9016	yes	AT1G68010	HPR	AT1G68010.1	3UTR	0.2349	203.5896373
1_25495800	+	T	1.94897	no	AT1G68010	HPR	AT1G68010.1	3UTR	0.238	203.5896373
1_25495837	+	T	2.21216	yes	AT1G68010	HPR	AT1G68010.1	3UTR	0.3494	203.5896373
1_25495844	+	G	2.80302	yes	AT1G68010	HPR	AT1G68010.1	3UTR	0.3705	203.5896373
1_25495845	+	T	0.0770745	no	AT1G68010	HPR	AT1G68010.1	3UTR	0.3735	203.5896373
1_25495846	+	T	0.213415	no	AT1G68010	HPR	AT1G68010.1	3UTR	0.3765	203.5896373
1_25495852	+	G	4.61917	yes	AT1G68010	HPR	AT1G68010.1	3UTR	0.3946	203.5896373
1_25495854	+	T	6.31905	yes	AT1G68010	HPR	AT1G68010.1	3UTR	0.4006	203.5896373
1_25495860	+	G	2.21047	no	AT1G68010	HPR	AT1G68010.1	3UTR	0.4187	203.5896373
1_25495861	+	T	1.30548	no	AT1G68010	HPR	AT1G68010.1	3UTR	0.4217	203.5896373
1_25495862	+	C	8.43971	no	AT1G68010	HPR	AT1G68010.1	3UTR	0.4247	203.5896373
1_25495863	+	T	12.089	yes	AT1G68010	HPR	AT1G68010.1	3UTR	0.4277	203.5896373
1_25786733	+	A	0.484887	yes	AT1G68680	AT1G68680	AT1G68680.1	3UTR	0.153	24.3525779
1_25786734	+	T	0.098003	no	AT1G68680	AT1G68680	AT1G68680.1	3UTR	0.1544	24.3525779
1_25786753	+	T	0.626099	yes	AT1G68680	AT1G68680	AT1G68680.1	3UTR	0.1808	24.3525779
1_26126411	+	A	4.45659	yes	AT1G69510	AT1G69510	AT1G69510.1,AT1G69510.3	5UTR,5UTR	0.6185,0.4359	102.4075204,97.1690589
1_26126412	+	G	1.8616	no	AT1G69510	AT1G69510	AT1G69510.1,AT1G69510.3	5UTR,5UTR	0.6243,0.4444	102.4075204,97.1690589
1_26126413	+	A	0.903309	no	AT1G69510	AT1G69510	AT1G69510.1,AT1G69510.3	5UTR,5UTR	0.6301,0.453	102.4075204,97.1690589
1_26126458	+	A	0.664091	yes	AT1G69510	AT1G69510	AT1G69510.1,AT1G69510.3,AT1G69510.2	5UTR,5UTR,5UTR	0.8902,0.8376,0.0093	102.4075204,97.1690589,0.1217645
1_26127839	+	T	1.91246	yes	AT1G69510	AT1G69510	AT1G69510.1,AT1G69510.3,AT1G69510.2	3UTR,3UTR,3UTR	0.3304,0.4809,0.5707	102.4075204,97.1690589,0.1217645
1_26127840	+	A	0.576303	no	AT1G69510	AT1G69510	AT1G69510.1,AT1G69510.3,AT1G69510.2	3UTR,3UTR,3UTR	0.3333,0.4851,0.5758	102.4075204,97.1690589,0.1217645
1_26127841	+	T	0.905101	no	AT1G69510	AT1G69510	AT1G69510.1,AT1G69510.3,AT1G69510.2	3UTR,3UTR,3UTR	0.3363,0.4894,0.5808	102.4075204,97.1690589,0.1217645
1_26127867	+	C	0.507686	no	AT1G69510	AT1G69510	AT1G69510.1,AT1G69510.3,AT1G69510.2	3UTR,3UTR,3UTR	0.4123,0.6,0.7121	102.4075204,97.1690589,0.1217645
1_26127868	+	A	1.65145	no	AT1G69510	AT1G69510	AT1G69510.1,AT1G69510.3,AT1G69510.2	3UTR,3UTR,3UTR	0.4152,0.6043,0.7172	102.4075204,97.1690589,0.1217645
1_26127869	+	C	6.05331	yes	AT1G69510	AT1G69510	AT1G69510.1,AT1G69510.3,AT1G69510.2	3UTR,3UTR,3UTR	0.4181,0.6085,0.7222	102.4075204,97.1690589,0.1217645
1_26127870	+	T	2.23478	no	AT1G69510	AT1G69510	AT1G69510.1,AT1G69510.3,AT1G69510.2	3UTR,3UTR,3UTR	0.4211,0.6128,0.7273	102.4075204,97.1690589,0.1217645
1_26127895	+	C	0.622025	no	AT1G69510	AT1G69510	AT1G69510.1,AT1G69510.3,AT1G69510.2	3UTR,3UTR,3UTR	0.4942,0.7191,0.8535	102.4075204,97.1690589,0.1217645
1_26127896	+	T	6.6503	no	AT1G69510	AT1G69510	AT1G69510.1,AT1G69510.3,AT1G69510.2	3UTR,3UTR,3UTR	0.4971,0.7234,0.8586	102.4075204,97.1690589,0.1217645
1_26127897	+	A	8.32757	yes	AT1G69510	AT1G69510	AT1G69510.1,AT1G69510.3,AT1G69510.2	3UTR,3UTR,3UTR	0.5,0.7277,0.8636	102.4075204,97.1690589,0.1217645
1_26127898	+	T	0.659219	no	AT1G69510	AT1G69510	AT1G69510.1,AT1G69510.3,AT1G69510.2	3UTR,3UTR,3UTR	0.5029,0.7319,0.8687	102.4075204,97.1690589,0.1217645
1_26189904	+	G	2.63084	yes	AT1G69620	RPL34B	AT1G69620.1	CDS	0.0513	843.4058327
1_26191100	+	T	4.06211	yes	AT1G69620	RPL34B	AT1G69620.1	3UTR	0.0559	843.4058327
1_26191104	+	T	6.87573	no	AT1G69620	RPL34B	AT1G69620.1	3UTR	0.0683	843.4058327
1_26191105	+	T	30.041	no	AT1G69620	RPL34B	AT1G69620.1	3UTR	0.0714	843.4058327
1_26191106	+	T	45.1578	yes	AT1G69620	RPL34B	AT1G69620.1	3UTR	0.0745	843.4058327
1_26191107	+	T	18.4894	no	AT1G69620	RPL34B	AT1G69620.1	3UTR	0.0776	843.4058327
1_26191112	+	C	0.132307	yes	AT1G69620	RPL34B	AT1G69620.1	3UTR	0.0932	843.4058327
1_26191119	+	C	6.66208	yes	AT1G69620	RPL34B	AT1G69620.1	3UTR	0.1149	843.4058327
1_26191124	+	G	4.61059	no	AT1G69620	RPL34B	AT1G69620.1	3UTR	0.1304	843.4058327
1_26191125	+	A	6.83045	yes	AT1G69620	RPL34B	AT1G69620.1	3UTR	0.1335	843.4058327
1_26191126	+	T	2.98881	no	AT1G69620	RPL34B	AT1G69620.1	3UTR	0.1366	843.4058327
1_26191128	+	G	1.65209	yes	AT1G69620	RPL34B	AT1G69620.1	3UTR	0.1429	843.4058327
1_26191134	+	G	3.06752	yes	AT1G69620	RPL34B	AT1G69620.1	3UTR	0.1615	843.4058327
1_26191148	+	C	14.7045	yes	AT1G69620	RPL34B	AT1G69620.1	3UTR	0.205	843.4058327
1_26191178	+	T	3.71529	yes	AT1G69620	RPL34B	AT1G69620.1	3UTR	0.2981	843.4058327
1_26191190	+	T	5.80126	yes	AT1G69620	RPL34B	AT1G69620.1	3UTR	0.3354	843.4058327
1_26191269	+	T	0.609011	yes	AT1G69620	RPL34B	AT1G69620.1	3UTR	0.5807	843.4058327
1_26234839	+	G	2.21643	yes	AT1G69740	HEMB1	AT1G69740.1,AT1G69740.3,AT1G69740.2	3UTR,3UTR,3UTR	0.502,0.3799,0.3799	108.7348517,8.5862552,5.0864089
1_26234845	+	T	1.531	yes	AT1G69740	HEMB1	AT1G69740.1,AT1G69740.3,AT1G69740.2	3UTR,3UTR,3UTR	0.5261,0.3982,0.3982	108.7348517,8.5862552,5.0864089
1_26234846	+	G	0.195176	no	AT1G69740	HEMB1	AT1G69740.1,AT1G69740.3,AT1G69740.2	3UTR,3UTR,3UTR	0.5301,0.4012,0.4012	108.7348517,8.5862552,5.0864089
1_26234848	+	A	0.471829	no	AT1G69740	HEMB1	AT1G69740.1,AT1G69740.3,AT1G69740.2	3UTR,3UTR,3UTR	0.5382,0.4073,0.4073	108.7348517,8.5862552,5.0864089
1_26234849	+	T	4.04968	no	AT1G69740	HEMB1	AT1G69740.1,AT1G69740.3,AT1G69740.2	3UTR,3UTR,3UTR	0.5422,0.4103,0.4103	108.7348517,8.5862552,5.0864089
1_26234850	+	T	12.7174	yes	AT1G69740	HEMB1	AT1G69740.1,AT1G69740.3,AT1G69740.2	3UTR,3UTR,3UTR	0.5462,0.4134,0.4134	108.7348517,8.5862552,5.0864089
1_26234851	+	A	1.45997	no	AT1G69740	HEMB1	AT1G69740.1,AT1G69740.3,AT1G69740.2	3UTR,3UTR,3UTR	0.5502,0.4164,0.4164	108.7348517,8.5862552,5.0864089
1_26615895	+	G	0.322709	yes	AT1G70580	GGAT2	AT1G70580.1,AT1G70580.3,AT1G70580.4,AT1G70580.2	3UTR,3UTR,3UTR,3UTR	0.2178,0.2197,0.2197,0.2197	13.8595228,11.3666244,1.6567904,0.8946966
1_26615932	+	T	6.04702	yes	AT1G70580	GGAT2	AT1G70580.1,AT1G70580.3,AT1G70580.4,AT1G70580.2	3UTR,3UTR,3UTR,3UTR	0.3822,0.3857,0.3857,0.3857	13.8595228,11.3666244,1.6567904,0.8946966
1_26615933	+	A	0.0728658	no	AT1G70580	GGAT2	AT1G70580.1,AT1G70580.3,AT1G70580.4,AT1G70580.2	3UTR,3UTR,3UTR,3UTR	0.3867,0.3901,0.3901,0.3901	13.8595228,11.3666244,1.6567904,0.8946966
1_26642081	+	A	3.73942	yes	AT1G70660	UEV1B	AT1G70660.1,AT1G70660.2	3UTR,3UTR	0.6583,0.6037	66.8923973,4.6335464
1_26642082	+	T	1.28381	no	AT1G70660	UEV1B	AT1G70660.1,AT1G70660.2	3UTR,3UTR	0.6633,0.6098	66.8923973,4.6335464
1_26642083	+	T	3.44659	no	AT1G70660	UEV1B	AT1G70660.1,AT1G70660.2	3UTR,3UTR	0.6683,0.6159	66.8923973,4.6335464
1_26642086	+	G	3.83977	yes	AT1G70660	UEV1B	AT1G70660.1,AT1G70660.2	3UTR,3UTR	0.6834,0.6341	66.8923973,4.6335464
1_26642090	+	T	0.0272247	no	AT1G70660	UEV1B	AT1G70660.1,AT1G70660.2	3UTR,3UTR	0.7035,0.6585	66.8923973,4.6335464
1_26642091	+	A	2.09257	no	AT1G70660	UEV1B	AT1G70660.1,AT1G70660.2	3UTR,3UTR	0.7085,0.6646	66.8923973,4.6335464
1_26642092	+	T	2.69611	yes	AT1G70660	UEV1B	AT1G70660.1,AT1G70660.2	3UTR,3UTR	0.7136,0.6707	66.8923973,4.6335464
1_26642104	+	T	2.03087	yes	AT1G70660	UEV1B	AT1G70660.1,AT1G70660.2	3UTR,3UTR	0.7739,0.7439	66.8923973,4.6335464
1_26688262	+	T	0.651472	no	AT1G70760	ndhL	AT1G70760.1	3UTR	0.3297	76.0436271
1_26688263	+	G	1.20354	yes	AT1G70760	ndhL	AT1G70760.1	3UTR	0.3352	76.0436271
1_26688293	+	T	2.10984	yes	AT1G70760	ndhL	AT1G70760.1	3UTR	0.5	76.0436271
1_26688296	+	G	1.49062	yes	AT1G70760	ndhL	AT1G70760.1	3UTR	0.5165	76.0436271
1_26688316	+	A	0.343898	yes	AT1G70760	ndhL	AT1G70760.1	3UTR	0.6264	76.0436271
1_26688329	+	A	2.39959	no	AT1G70760	ndhL	AT1G70760.1	3UTR	0.6978	76.0436271
1_26688330	+	C	2.40893	yes	AT1G70760	ndhL	AT1G70760.1	3UTR	0.7033	76.0436271
1_26851814	+	T	2.22543	yes	AT1G71220	UGGT	AT1G71220.1,AT1G71220.2,AT1G71220.3	3UTR,3UTR,3UTR	0.364,0.4415,0.3739	17.5328779,8.7739159,0.4057108
1_26851829	+	T	0.545887	yes	AT1G71220	UGGT	AT1G71220.1,AT1G71220.2,AT1G71220.3	3UTR,3UTR,3UTR	0.4298,0.5213,0.4414	17.5328779,8.7739159,0.4057108
1_26937376	+	G	0.141454	yes	AT1G71500	AT1G71500	AT1G71500.1	3UTR	0.16	183.3672891
1_26937412	+	T	1.68231	yes	AT1G71500	AT1G71500	AT1G71500.1	3UTR	0.2909	183.3672891
1_26937449	+	G	0.161366	no	AT1G71500	AT1G71500	AT1G71500.1	3UTR	0.4255	183.3672891
1_26937450	+	T	3.7331	no	AT1G71500	AT1G71500	AT1G71500.1	3UTR	0.4291	183.3672891
1_26937451	+	T	6.09632	yes	AT1G71500	AT1G71500	AT1G71500.1	3UTR	0.4327	183.3672891
1_26937457	+	C	1.73137	yes	AT1G71500	AT1G71500	AT1G71500.1	3UTR	0.4545	183.3672891
1_27150820	+	T	1.34164	yes	AT1G72150	PATL1	AT1G72150.1	3UTR	0.4897	133.3608942
1_27150821	+	T	1.24776	no	AT1G72150	PATL1	AT1G72150.1	3UTR	0.4927	133.3608942
1_27157623	+	G	0.678486	yes	AT1G72170	AT1G72170	AT1G72170.1	3UTR	0.363	73.5715297
1_27376201	+	T	1.95489	yes	AT1G72710	CKL2	AT1G72710.1	3UTR	0.0399	71.6025724
1_27376202	+	G	1.19245	no	AT1G72710	CKL2	AT1G72710.1	3UTR	0.0417	71.6025724
1_27376203	+	A	0.838026	no	AT1G72710	CKL2	AT1G72710.1	3UTR	0.0436	71.6025724
1_27376247	+	T	3.41544	yes	AT1G72710	CKL2	AT1G72710.1	3UTR	0.1234	71.6025724
1_27376277	+	G	2.1298	yes	AT1G72710	CKL2	AT1G72710.1	3UTR	0.1779	71.6025724
1_27376280	+	T	4.5095	no	AT1G72710	CKL2	AT1G72710.1	3UTR	0.1833	71.6025724
1_27376281	+	T	4.30208	no	AT1G72710	CKL2	AT1G72710.1	3UTR	0.1851	71.6025724
1_27376282	+	T	7.93871	yes	AT1G72710	CKL2	AT1G72710.1	3UTR	0.1869	71.6025724
1_27376464	+	T	3.40019	yes	AT1G72710	CKL2	AT1G72710.1	3UTR	0.5172	71.6025724
1_27376467	+	G	1.73589	yes	AT1G72710	CKL2	AT1G72710.1	3UTR	0.5227	71.6025724
1_27376496	+	T	0.365379	yes	AT1G72710	CKL2	AT1G72710.1	3UTR	0.5753	71.6025724
1_27481368	+	T	1.24596	yes	AT1G73060	LPA3	AT1G73060.1	3UTR	0.3609	45.0882895
1_27481404	+	T	2.89674	yes	AT1G73060	LPA3	AT1G73060.1	3UTR	0.4801	45.0882895
1_27481405	+	C	0.162642	no	AT1G73060	LPA3	AT1G73060.1	3UTR	0.4834	45.0882895
1_27481406	+	T	0.286816	no	AT1G73060	LPA3	AT1G73060.1	3UTR	0.4868	45.0882895
1_27611003	+	A	2.04092	yes	AT1G73430	AT1G73430	AT1G73430.1,AT1G73430.2	3UTR,3UTR	0.5966,0.6113	15.4293,1.0598493
1_27611004	+	T	0.456515	no	AT1G73430	AT1G73430	AT1G73430.1,AT1G73430.2	3UTR,3UTR	0.6,0.6148	15.4293,1.0598493
1_27611005	+	C	0.655276	no	AT1G73430	AT1G73430	AT1G73430.1,AT1G73430.2	3UTR,3UTR	0.6034,0.6184	15.4293,1.0598493
1_27613351	+	T	0.979957	no	AT1G73440	AT1G73440	AT1G73440.1	3UTR	1.8481	9.2729437
1_27613352	+	T	2.01647	no	AT1G73440	AT1G73440	AT1G73440.1	3UTR	1.8497	9.2729437
1_27613353	+	G	7.45448	no	AT1G73440	AT1G73440	AT1G73440.1	3UTR	1.8513	9.2729437
1_27613354	+	T	13.0906	yes	AT1G73440	AT1G73440	AT1G73440.1	3UTR	1.8528	9.2729437
1_27613355	+	T	3.9191	no	AT1G73440	AT1G73440	AT1G73440.1	3UTR	1.8544	9.2729437
1_27828796	+	C	5.2146	yes	AT1G73990	SPPA	AT1G73990.1,AT1G73990.2	CDS,3UTR	0.9528,0.4774	26.4562097,1.650486
1_27828827	+	C	2.3839	yes	AT1G73990	SPPA	AT1G73990.1,AT1G73990.2	3UTR,3UTR	0.0884,0.5441	26.4562097,1.650486
1_27828844	+	A	0.704353	yes	AT1G73990	SPPA	AT1G73990.1,AT1G73990.2	3UTR,3UTR	0.1674,0.5806	26.4562097,1.650486
1_27828864	+	T	0.716299	yes	AT1G73990	SPPA	AT1G73990.1,AT1G73990.2	3UTR,3UTR	0.2605,0.6237	26.4562097,1.650486
1_27845695	+	C	2.39934	yes	AT1G74040	IPMS2	AT1G74040.1,AT1G74040.2	3UTR,3UTR	0.5953,0.7672	12.8257366,0.4400682
1_27916916	+	T	1.11648	yes	AT1G74230	RBG5	AT1G74230.1	3UTR	0.2427	125.7800779
1_27916917	+	C	0.0968351	no	AT1G74230	RBG5	AT1G74230.1	3UTR	0.2469	125.7800779
1_27992903	+	T	4.75683	no	AT1G74470	CHLP	AT1G74470.1	3UTR	0.0952	465.3298591
1_27992904	+	A	5.74864	yes	AT1G74470	CHLP	AT1G74470.1	3UTR	0.0968	465.3298591
1_27992905	+	G	4.48279	no	AT1G74470	CHLP	AT1G74470.1	3UTR	0.0985	465.3298591
1_27992906	+	T	1.47765	no	AT1G74470	CHLP	AT1G74470.1	3UTR	0.1002	465.3298591
1_27992913	+	T	2.30153	yes	AT1G74470	CHLP	AT1G74470.1	3UTR	0.1119	465.3298591
1_27992924	+	G	1.58139	yes	AT1G74470	CHLP	AT1G74470.1	3UTR	0.1302	465.3298591
1_27992927	+	G	0.0340206	yes	AT1G74470	CHLP	AT1G74470.1	3UTR	0.1352	465.3298591
1_27992941	+	T	0.0549595	yes	AT1G74470	CHLP	AT1G74470.1	3UTR	0.1586	465.3298591
1_28101714	+	G	0.891639	yes	AT1G74790	HIPL1	AT1G74790.1	3UTR	0.1802	29.6882769
1_28101715	+	A	0.891639	no	AT1G74790	HIPL1	AT1G74790.1	3UTR	0.1847	29.6882769
1_28272708	+	T	0.870662	yes	AT1G75350	RPL31	AT1G75350.1	3UTR	0.0623	342.4810331
1_28272730	+	T	0.426826	no	AT1G75350	RPL31	AT1G75350.1	3UTR	0.1308	342.4810331
1_28272731	+	T	2.98022	yes	AT1G75350	RPL31	AT1G75350.1	3UTR	0.134	342.4810331
1_28272732	+	T	1.05356	no	AT1G75350	RPL31	AT1G75350.1	3UTR	0.1371	342.4810331
1_28272734	+	A	5.68577	yes	AT1G75350	RPL31	AT1G75350.1	3UTR	0.1433	342.4810331
1_28272735	+	A	3.89111	no	AT1G75350	RPL31	AT1G75350.1	3UTR	0.1464	342.4810331
1_28272740	+	A	1.20238	yes	AT1G75350	RPL31	AT1G75350.1	3UTR	0.162	342.4810331
1_28272746	+	G	4.22177	yes	AT1G75350	RPL31	AT1G75350.1	3UTR	0.1807	342.4810331
1_28272765	+	A	0.678353	yes	AT1G75350	RPL31	AT1G75350.1	3UTR	0.2399	342.4810331
1_28272771	+	G	7.67931	yes	AT1G75350	RPL31	AT1G75350.1	3UTR	0.2586	342.4810331
1_28272779	+	A	0.559761	no	AT1G75350	RPL31	AT1G75350.1	3UTR	0.2835	342.4810331
1_28272780	+	T	6.21866	yes	AT1G75350	RPL31	AT1G75350.1	3UTR	0.2866	342.4810331
1_28272781	+	T	0.948911	no	AT1G75350	RPL31	AT1G75350.1	3UTR	0.2897	342.4810331
1_28272782	+	T	1.14046	no	AT1G75350	RPL31	AT1G75350.1	3UTR	0.2928	342.4810331
1_28272785	+	T	1.28625	yes	AT1G75350	RPL31	AT1G75350.1	3UTR	0.3022	342.4810331
1_28402070	+	T	0.0672765	no	AT1G75630	VHA-C4	AT1G75630.1,AT1G75630.2	3UTR,3UTR	0.144,0.1149	151.4071212,0.0110706
1_28402071	+	A	1.9254	yes	AT1G75630	VHA-C4	AT1G75630.1,AT1G75630.2	3UTR,3UTR	0.1479,0.118	151.4071212,0.0110706
1_28402131	+	C	2.57654	yes	AT1G75630	VHA-C4	AT1G75630.1,AT1G75630.2	3UTR,3UTR	0.3813,0.3043	151.4071212,0.0110706
1_28402135	+	T	1.54103	no	AT1G75630	VHA-C4	AT1G75630.1,AT1G75630.2	3UTR,3UTR	0.3969,0.3168	151.4071212,0.0110706
1_28402136	+	A	1.75891	yes	AT1G75630	VHA-C4	AT1G75630.1,AT1G75630.2	3UTR,3UTR	0.4008,0.3199	151.4071212,0.0110706
1_28402138	+	T	17.7701	yes	AT1G75630	VHA-C4	AT1G75630.1,AT1G75630.2	3UTR,3UTR	0.4086,0.3261	151.4071212,0.0110706
1_28402139	+	A	6.34629	no	AT1G75630	VHA-C4	AT1G75630.1,AT1G75630.2	3UTR,3UTR	0.4125,0.3292	151.4071212,0.0110706
1_28402140	+	T	0.475933	no	AT1G75630	VHA-C4	AT1G75630.1,AT1G75630.2	3UTR,3UTR	0.4163,0.3323	151.4071212,0.0110706
1_28402148	+	A	2.34023	yes	AT1G75630	VHA-C4	AT1G75630.1,AT1G75630.2	3UTR,3UTR	0.4475,0.3571	151.4071212,0.0110706
1_28402167	+	A	0.58581	no	AT1G75630	VHA-C4	AT1G75630.1,AT1G75630.2	3UTR,3UTR	0.5214,0.4161	151.4071212,0.0110706
1_28402168	+	A	4.70703	no	AT1G75630	VHA-C4	AT1G75630.1,AT1G75630.2	3UTR,3UTR	0.5253,0.4193	151.4071212,0.0110706
1_28402169	+	T	5.13248	no	AT1G75630	VHA-C4	AT1G75630.1,AT1G75630.2	3UTR,3UTR	0.5292,0.4224	151.4071212,0.0110706
1_28402170	+	T	8.52546	yes	AT1G75630	VHA-C4	AT1G75630.1,AT1G75630.2	3UTR,3UTR	0.5331,0.4255	151.4071212,0.0110706
1_28402171	+	A	7.4928	no	AT1G75630	VHA-C4	AT1G75630.1,AT1G75630.2	3UTR,3UTR	0.537,0.4286	151.4071212,0.0110706
1_28415040	+	T	0.691447	yes	AT1G75660	XRN3	AT1G75660.1	3UTR	0.7329	33.8599701
1_28415062	+	C	4.06345	yes	AT1G75660	XRN3	AT1G75660.1	3UTR	0.8082	33.8599701
1_28517514	+	A	0.922437	yes	AT1G75950	SKP1A	AT1G75950.1	3UTR	0.1338	341.0296435
1_28517547	+	T	0.395401	no	AT1G75950	SKP1A	AT1G75950.1	3UTR	0.2086	341.0296435
1_28517548	+	T	6.91228	yes	AT1G75950	SKP1A	AT1G75950.1	3UTR	0.2109	341.0296435
1_28517549	+	T	2.34935	no	AT1G75950	SKP1A	AT1G75950.1	3UTR	0.2132	341.0296435
1_28517553	+	T	0.607502	yes	AT1G75950	SKP1A	AT1G75950.1	3UTR	0.2222	341.0296435
1_28517559	+	T	5.37956	no	AT1G75950	SKP1A	AT1G75950.1	3UTR	0.2358	341.0296435
1_28517560	+	C	8.64827	yes	AT1G75950	SKP1A	AT1G75950.1	3UTR	0.2381	341.0296435
1_28517590	+	T	2.25145	yes	AT1G75950	SKP1A	AT1G75950.1	3UTR	0.3061	341.0296435
1_28517598	+	T	1.07637	yes	AT1G75950	SKP1A	AT1G75950.1	3UTR	0.3243	341.0296435
1_28517599	+	A	0.423679	no	AT1G75950	SKP1A	AT1G75950.1	3UTR	0.3265	341.0296435
1_28517616	+	C	1.27755	yes	AT1G75950	SKP1A	AT1G75950.1	3UTR	0.3651	341.0296435
1_28517646	+	T	1.30466	no	AT1G75950	SKP1A	AT1G75950.1	3UTR	0.4331	341.0296435
1_28517647	+	T	1.21266	no	AT1G75950	SKP1A	AT1G75950.1	3UTR	0.4354	341.0296435
1_28517648	+	T	9.14816	yes	AT1G75950	SKP1A	AT1G75950.1	3UTR	0.4376	341.0296435
1_28536924	+	A	0.312474	yes	AT1G76030	VHA-B1	AT1G76030.1	3UTR	0.0253	116.4560331
1_28536942	+	G	0.0258033	yes	AT1G76030	VHA-B1	AT1G76030.1	3UTR	0.0903	116.4560331
1_28536995	+	T	0.611532	yes	AT1G76030	VHA-B1	AT1G76030.1	3UTR	0.2816	116.4560331
1_28537057	+	T	1.95938	yes	AT1G76030	VHA-B1	AT1G76030.1	3UTR	0.5054	116.4560331
1_28537058	+	T	1.52191	no	AT1G76030	VHA-B1	AT1G76030.1	3UTR	0.509	116.4560331
1_28537059	+	T	0.509499	no	AT1G76030	VHA-B1	AT1G76030.1	3UTR	0.5126	116.4560331
1_28537066	+	T	1.20995	yes	AT1G76030	VHA-B1	AT1G76030.1	3UTR	0.5379	116.4560331
1_28537071	+	C	3.15817	yes	AT1G76030	VHA-B1	AT1G76030.1	3UTR	0.556	116.4560331
1_28537138	+	G	0.0219352	yes	AT1G76030	VHA-B1	AT1G76030.1	3UTR	0.7978	116.4560331
1_28594549	+	C	0.950719	yes	AT1G76200	AT1G76200	AT1G76200.1	3UTR	0.2118	566.488241
1_28594552	+	A	5.31614	no	AT1G76200	AT1G76200	AT1G76200.1	3UTR	0.2235	566.488241
1_28594553	+	A	0.324414	no	AT1G76200	AT1G76200	AT1G76200.1	3UTR	0.2275	566.488241
1_28594554	+	T	13.1255	no	AT1G76200	AT1G76200	AT1G76200.1	3UTR	0.2314	566.488241
1_28594555	+	T	17.7458	yes	AT1G76200	AT1G76200	AT1G76200.1	3UTR	0.2353	566.488241
1_28594556	+	T	2.43901	no	AT1G76200	AT1G76200	AT1G76200.1	3UTR	0.2392	566.488241
1_28594562	+	T	2.01601	no	AT1G76200	AT1G76200	AT1G76200.1	3UTR	0.2627	566.488241
1_28594563	+	T	5.80358	yes	AT1G76200	AT1G76200	AT1G76200.1	3UTR	0.2667	566.488241
1_28594569	+	G	5.5102	yes	AT1G76200	AT1G76200	AT1G76200.1	3UTR	0.2902	566.488241
1_28594605	+	G	6.53811	no	AT1G76200	AT1G76200	AT1G76200.1	3UTR	0.4314	566.488241
1_28594606	+	T	11.2993	no	AT1G76200	AT1G76200	AT1G76200.1	3UTR	0.4353	566.488241
1_28594607	+	T	18.1505	yes	AT1G76200	AT1G76200	AT1G76200.1	3UTR	0.4392	566.488241
1_28594608	+	T	1.52618	no	AT1G76200	AT1G76200	AT1G76200.1	3UTR	0.4431	566.488241
1_28594621	+	T	7.02756	yes	AT1G76200	AT1G76200	AT1G76200.1	3UTR	0.4941	566.488241
1_28594642	+	T	1.21614	yes	AT1G76200	AT1G76200	AT1G76200.1	3UTR	0.5765	566.488241
1_28594644	+	T	0.0881999	yes	AT1G76200	AT1G76200	AT1G76200.1	3UTR	0.5843	566.488241
1_28594648	+	G	5.8136	yes	AT1G76200	AT1G76200	AT1G76200.1	3UTR	0.6	566.488241
1_28594687	+	T	1.29895	no	AT1G76200	AT1G76200	AT1G76200.1	3UTR	0.7529	566.488241
1_28594688	+	T	3.20783	yes	AT1G76200	AT1G76200	AT1G76200.1	3UTR	0.7569	566.488241
1_28698419	+	T	0.0891363	yes	AT1G76490	HMG1	AT1G76490.1	3UTR	0.3287	205.9716753
1_28698420	+	A	0.0891363	no	AT1G76490	HMG1	AT1G76490.1	3UTR	0.3302	205.9716753
1_28698423	+	A	0.17665	yes	AT1G76490	HMG1	AT1G76490.1	3UTR	0.3349	205.9716753
1_28698518	+	A	0.816797	yes	AT1G76490	HMG1	AT1G76490.1	3UTR	0.4822	205.9716753
1_28698563	+	T	2.00225	yes	AT1G76490	HMG1	AT1G76490.1	3UTR	0.5519	205.9716753
1_29120073	+	T	0.742736	yes	AT1G77490	APXT	AT1G77490.1	3UTR	0.0249	7.4513034
1_29207859	+	G	2.70462	yes	AT1G77710	AT1G77710	AT1G77710.1	CDS	0.561	168.2601925
1_29207863	+	G	0.97391	yes	AT1G77710	AT1G77710	AT1G77710.1	CDS	0.6098	168.2601925
1_29207904	+	A	3.73317	yes	AT1G77710	AT1G77710	AT1G77710.1	3UTR	0.0321	168.2601925
1_29207911	+	G	4.71894	yes	AT1G77710	AT1G77710	AT1G77710.1	3UTR	0.0602	168.2601925
1_29207912	+	A	3.29017	no	AT1G77710	AT1G77710	AT1G77710.1	3UTR	0.0643	168.2601925
1_29207947	+	T	1.81732	yes	AT1G77710	AT1G77710	AT1G77710.1	3UTR	0.2048	168.2601925
1_29207957	+	C	3.01202	no	AT1G77710	AT1G77710	AT1G77710.1	3UTR	0.245	168.2601925
1_29207958	+	T	3.98474	no	AT1G77710	AT1G77710	AT1G77710.1	3UTR	0.249	168.2601925
1_29207959	+	T	6.77797	yes	AT1G77710	AT1G77710	AT1G77710.1	3UTR	0.253	168.2601925
1_29207975	+	G	0.747457	yes	AT1G77710	AT1G77710	AT1G77710.1	3UTR	0.3173	168.2601925
1_29207978	+	T	1.84557	yes	AT1G77710	AT1G77710	AT1G77710.1	3UTR	0.3293	168.2601925
1_29207984	+	T	4.48297	no	AT1G77710	AT1G77710	AT1G77710.1	3UTR	0.3534	168.2601925
1_29207985	+	G	2.93941	no	AT1G77710	AT1G77710	AT1G77710.1	3UTR	0.3574	168.2601925
1_29207986	+	T	7.72394	yes	AT1G77710	AT1G77710	AT1G77710.1	3UTR	0.3614	168.2601925
1_29207989	+	T	0.48129	yes	AT1G77710	AT1G77710	AT1G77710.1	3UTR	0.3735	168.2601925
1_29302514	+	C	1.9674	no	AT1G77930	AT1G77930	AT1G77930.1,AT1G77930.3,AT1G77930.2	3UTR,3UTR,3UTR	0.1885,0.6221,0.8846	17.3694411,2.3675701,0.0601932
1_29302515	+	A	4.19879	yes	AT1G77930	AT1G77930	AT1G77930.1,AT1G77930.3,AT1G77930.2	3UTR,3UTR,3UTR	0.1926,0.624,0.9038	17.3694411,2.3675701,0.0601932
1_29302585	+	T	10.9326	yes	AT1G77930	AT1G77930	AT1G77930.1,AT1G77930.3	3UTR,3UTR	0.4795,0.7576	17.3694411,2.3675701
1_29346787	+	T	2.48072	yes	AT1G78040	AT1G78040	AT1G78040.2,AT1G78040.3,AT1G78040.1	CDS,CDS,CDS	0.8481,0.8481,0.8481	469.0525205,353.2313956,0.3594327
1_29346851	+	A	0.842423	yes	AT1G78040	AT1G78040	AT1G78040.2,AT1G78040.3,AT1G78040.1	3UTR,3UTR,3UTR	0.0467,0.0312,0.0292	469.0525205,353.2313956,0.3594327
1_29346923	+	T	3.2832	yes	AT1G78040	AT1G78040	AT1G78040.2,AT1G78040.3,AT1G78040.1	3UTR,3UTR,3UTR	0.3832,0.2562,0.2398	469.0525205,353.2313956,0.3594327
1_29346924	+	T	2.27528	no	AT1G78040	AT1G78040	AT1G78040.2,AT1G78040.3,AT1G78040.1	3UTR,3UTR,3UTR	0.3879,0.2594,0.2427	469.0525205,353.2313956,0.3594327
1_29346927	+	T	9.18428	no	AT1G78040	AT1G78040	AT1G78040.2,AT1G78040.3,AT1G78040.1	3UTR,3UTR,3UTR	0.4019,0.2688,0.2515	469.0525205,353.2313956,0.3594327
1_29346928	+	T	5.63616	no	AT1G78040	AT1G78040	AT1G78040.2,AT1G78040.3,AT1G78040.1	3UTR,3UTR,3UTR	0.4065,0.2719,0.2544	469.0525205,353.2313956,0.3594327
1_29346929	+	A	10.5894	no	AT1G78040	AT1G78040	AT1G78040.2,AT1G78040.3,AT1G78040.1	3UTR,3UTR,3UTR	0.4112,0.275,0.2573	469.0525205,353.2313956,0.3594327
1_29346930	+	T	7.30357	no	AT1G78040	AT1G78040	AT1G78040.2,AT1G78040.3,AT1G78040.1	3UTR,3UTR,3UTR	0.4159,0.2781,0.2602	469.0525205,353.2313956,0.3594327
1_29346931	+	T	7.30398	no	AT1G78040	AT1G78040	AT1G78040.2,AT1G78040.3,AT1G78040.1	3UTR,3UTR,3UTR	0.4206,0.2812,0.2632	469.0525205,353.2313956,0.3594327
1_29346932	+	T	12.0849	yes	AT1G78040	AT1G78040	AT1G78040.2,AT1G78040.3,AT1G78040.1	3UTR,3UTR,3UTR	0.4252,0.2844,0.2661	469.0525205,353.2313956,0.3594327
1_29346933	+	G	4.27921	no	AT1G78040	AT1G78040	AT1G78040.2,AT1G78040.3,AT1G78040.1	3UTR,3UTR,3UTR	0.4299,0.2875,0.269	469.0525205,353.2313956,0.3594327
1_29346937	+	T	3.80481	no	AT1G78040	AT1G78040	AT1G78040.2,AT1G78040.3,AT1G78040.1	3UTR,3UTR,3UTR	0.4486,0.3,0.2807	469.0525205,353.2313956,0.3594327
1_29346938	+	C	0.546158	no	AT1G78040	AT1G78040	AT1G78040.2,AT1G78040.3,AT1G78040.1	3UTR,3UTR,3UTR	0.4533,0.3031,0.2836	469.0525205,353.2313956,0.3594327
1_29346939	+	T	19.1501	yes	AT1G78040	AT1G78040	AT1G78040.2,AT1G78040.3,AT1G78040.1	3UTR,3UTR,3UTR	0.4579,0.3062,0.2865	469.0525205,353.2313956,0.3594327
1_29346940	+	T	2.27613	no	AT1G78040	AT1G78040	AT1G78040.2,AT1G78040.3,AT1G78040.1	3UTR,3UTR,3UTR	0.4626,0.3094,0.2895	469.0525205,353.2313956,0.3594327
1_29346941	+	T	7.6263	no	AT1G78040	AT1G78040	AT1G78040.2,AT1G78040.3,AT1G78040.1	3UTR,3UTR,3UTR	0.4673,0.3125,0.2924	469.0525205,353.2313956,0.3594327
1_29346942	+	A	4.19935	no	AT1G78040	AT1G78040	AT1G78040.2,AT1G78040.3,AT1G78040.1	3UTR,3UTR,3UTR	0.472,0.3156,0.2953	469.0525205,353.2313956,0.3594327
1_29346951	+	G	16.2741	yes	AT1G78040	AT1G78040	AT1G78040.2,AT1G78040.3,AT1G78040.1	3UTR,3UTR,3UTR	0.514,0.3438,0.3216	469.0525205,353.2313956,0.3594327
1_29346960	+	G	2.45583	yes	AT1G78040	AT1G78040	AT1G78040.2,AT1G78040.3,AT1G78040.1	3UTR,3UTR,3UTR	0.5561,0.3719,0.348	469.0525205,353.2313956,0.3594327
1_29346961	+	A	0.771725	no	AT1G78040	AT1G78040	AT1G78040.2,AT1G78040.3,AT1G78040.1	3UTR,3UTR,3UTR	0.5607,0.375,0.3509	469.0525205,353.2313956,0.3594327
1_29346995	+	A	1.67702	no	AT1G78040	AT1G78040	AT1G78040.2,AT1G78040.3,AT1G78040.1	3UTR,3UTR,3UTR	0.7196,0.4812,0.4503	469.0525205,353.2313956,0.3594327
1_29346996	+	T	5.24905	yes	AT1G78040	AT1G78040	AT1G78040.2,AT1G78040.3,AT1G78040.1	3UTR,3UTR,3UTR	0.7243,0.4844,0.4532	469.0525205,353.2313956,0.3594327
1_29346997	+	A	1.69097	no	AT1G78040	AT1G78040	AT1G78040.2,AT1G78040.3,AT1G78040.1	3UTR,3UTR,3UTR	0.729,0.4875,0.4561	469.0525205,353.2313956,0.3594327
1_29577472	+	C	2.34029	yes	AT1G78630	RPL13	AT1G78630.1	3UTR	0.1374	366.8207217
1_29577507	+	T	0.789884	yes	AT1G78630	RPL13	AT1G78630.1	3UTR	0.2114	366.8207217
1_29577517	+	T	2.62393	yes	AT1G78630	RPL13	AT1G78630.1	3UTR	0.2326	366.8207217
1_29577518	+	T	0.170285	no	AT1G78630	RPL13	AT1G78630.1	3UTR	0.2347	366.8207217
1_29588202	+	G	5.99686	yes	AT1G78660	GGH1	AT1G78660.3,AT1G78660.2,AT1G78660.1	3UTR,3UTR,3UTR	0.4565,0.31,0.31	54.2170651,23.8336729,7.6768545
1_29596121	+	A	4.02175	yes	AT1G78680	GGH2	AT1G78680.1,AT1G78680.2	3UTR,3UTR	0.3074,0.7379	46.3386081,1.0203407
1_29596122	+	A	1.82886	no	AT1G78680	GGH2	AT1G78680.1,AT1G78680.2	3UTR,3UTR	0.3111,0.7427	46.3386081,1.0203407
1_29596123	+	C	1.10192	no	AT1G78680	GGH2	AT1G78680.1,AT1G78680.2	3UTR,3UTR	0.3148,0.7476	46.3386081,1.0203407
1_29596124	+	T	3.86176	no	AT1G78680	GGH2	AT1G78680.1,AT1G78680.2	3UTR,3UTR	0.3185,0.7524	46.3386081,1.0203407
1_29596125	+	T	2.12594	no	AT1G78680	GGH2	AT1G78680.1,AT1G78680.2	3UTR,3UTR	0.3222,0.7573	46.3386081,1.0203407
1_29596126	+	T	1.61522	no	AT1G78680	GGH2	AT1G78680.1,AT1G78680.2	3UTR,3UTR	0.3259,0.7621	46.3386081,1.0203407
1_29652360	+	T	2.5044	yes	AT1G78870	UBC35	AT1G78870.2,AT1G78870.3,AT1G78870.4,AT1G78870.1	3UTR,3UTR,3UTR,3UTR	0.3833,0.4208,0.4021,0.4984	57.8301245,1.5258164,0.3419113,0.0567799
1_29664647	+	C	1.88477	yes	AT1G78900	VHA-A	AT1G78900.1,AT1G78900.2	3UTR,3UTR	0.1414,0.1864	242.2406478,89.8580494
1_29664648	+	A	1.88477	no	AT1G78900	VHA-A	AT1G78900.1,AT1G78900.2	3UTR,3UTR	0.1434,0.189	242.2406478,89.8580494
1_29664666	+	T	0.594293	yes	AT1G78900	VHA-A	AT1G78900.1,AT1G78900.2	3UTR,3UTR	0.1793,0.2362	242.2406478,89.8580494
1_29664728	+	G	5.15345	no	AT1G78900	VHA-A	AT1G78900.1,AT1G78900.2	3UTR,3UTR	0.3028,0.399	242.2406478,89.8580494
1_29664729	+	T	4.81411	no	AT1G78900	VHA-A	AT1G78900.1,AT1G78900.2	3UTR,3UTR	0.3048,0.4016	242.2406478,89.8580494
1_29664730	+	T	5.20588	yes	AT1G78900	VHA-A	AT1G78900.1,AT1G78900.2	3UTR,3UTR	0.3068,0.4042	242.2406478,89.8580494
1_29664731	+	T	1.88871	no	AT1G78900	VHA-A	AT1G78900.1,AT1G78900.2	3UTR,3UTR	0.3088,0.4068	242.2406478,89.8580494
1_29664809	+	T	8.45987	yes	AT1G78900	VHA-A	AT1G78900.1,AT1G78900.2	3UTR,3UTR	0.4641,0.6115	242.2406478,89.8580494
1_29664852	+	T	4.64325	yes	AT1G78900	VHA-A	AT1G78900.1,AT1G78900.2	3UTR,3UTR	0.5498,0.7244	242.2406478,89.8580494
1_29664853	+	T	3.24729	no	AT1G78900	VHA-A	AT1G78900.1,AT1G78900.2	3UTR,3UTR	0.5518,0.727	242.2406478,89.8580494
1_29664858	+	G	0.496658	yes	AT1G78900	VHA-A	AT1G78900.1,AT1G78900.2	3UTR,3UTR	0.5618,0.7402	242.2406478,89.8580494
1_29664859	+	T	0.424879	no	AT1G78900	VHA-A	AT1G78900.1,AT1G78900.2	3UTR,3UTR	0.5637,0.7428	242.2406478,89.8580494
1_29664867	+	C	0.374076	yes	AT1G78900	VHA-A	AT1G78900.1,AT1G78900.2	3UTR,3UTR	0.5797,0.7638	242.2406478,89.8580494
[truncated: 13,961 more rows]

## Sheet: GENES 110kD, ECT2-iCLIP TARGETS
GENE ID	GENE NAME	PEAKS	PEAKS IDs	STRAND	TRANSCRIPTS	TRANSCRIPTS TPM (ECT2 HT CTLs)
AT1G01540	AT1G01540	1	1_198524	+	AT1G01540.2,AT1G01540.1	30.8101106,2.8294822
AT1G01550	BPS1	1	1_201665	+	AT1G01550.1,AT1G01550.2	77.2432485,11.921764
AT1G01630	AT1G01630	4	1_230651,1_230705,1_230715,1_230784	+	AT1G01630.1	63.0116791
AT1G01800	AT1G01800	9	1_294947,1_294956,1_294957,1_294958,1_294972,1_294975,1_294976,1_294977,1_294978	+	AT1G01800.1,AT1G01800.2	67.9363543,0.0119928
AT1G02080	AT1G02080	1	1_386704	+	AT1G02080.2,AT1G02080.3,AT1G02080.1	8.2344902,2.3440901,0.7845952
AT1G02120	VAD1	1	1_399851	+	AT1G02120.1,AT1G02120.2,AT1G02120.3	29.6298626,1.1413534,1.1040455
AT1G02305	AT1G02305	5	1_458029,1_458030,1_458037,1_458038,1_458093	+	AT1G02305.1	90.0013324
AT1G02500	SAM1	7	1_520221,1_520302,1_520303,1_520310,1_520312,1_520316,1_520317	+	AT1G02500.1,AT1G02500.2	347.6712191,126.4382399
AT1G02560	CLPP5	5	1_539888,1_539920,1_539930,1_539936,1_539937	+	AT1G02560.1	167.1861834
AT1G03150	AT1G03150	3	1_758518,1_758529,1_758530	+	AT1G03150.1	26.0853691
AT1G03600	PSB27-1	2	1_899579,1_899633	+	AT1G03600.1	243.9835804
AT1G03630	PORC	1	1_909222	+	AT1G03630.1,AT1G03630.2	61.1067223,21.439434
AT1G03900	ATNAP4	1	1_993048	+	AT1G03900.1	143.4596462
AT1G04080	PRP39	1	1_1056615	+	AT1G04080.1,AT1G04080.3,AT1G04080.2,AT1G04080.5,AT1G04080.4	33.6011342,2.0560781,1.1959138,0.0752766,0.0439954
AT1G04170	EIF2 GAMMA	1	1_1099813	+	AT1G04170.1,AT1G04170.2	97.4894415,0.1479933
AT1G04250	IAA17	11	1_1138408,1_1138409,1_1138410,1_1138411,1_1138505,1_1138518,1_1138526,1_1138547,1_1138560,1_1138561,1_1138563	+	AT1G04250.1	74.9965901
AT1G04420	AT1G04420	2	1_1193854,1_1193855	+	AT1G04420.1	53.6594312
AT1G04430	AT1G04430	2	1_1201387,1_1201402	+	AT1G04430.1,AT1G04430.2,AT1G04430.3	59.6417389,6.5537327,0.3350352
AT1G04480	RPL23C	19	1_1217279,1_1217280,1_1217281,1_1217331,1_1217332,1_1217333,1_1217334,1_1217335,1_1217336,1_1217337,1_1217338,1_1217339,1_1217340,1_1217343,1_1217346,1_1217362,1_1217363,1_1217364,1_1217368	+	AT1G04480.1	726.3825103
AT1G04510	PRP19A	3	1_1230678,1_1230679,1_1230703	+	AT1G04510.1,AT1G04510.2	44.6306774,0.405891
AT1G04940	TIC20-I	2	1_1400712,1_1400713	+	AT1G04940.1	71.0617439
AT1G06390	ASK9	4	1_1950580,1_1950581,1_1950582,1_1950647	+	AT1G06390.1,AT1G06390.2	28.4225426,8.4338685
AT1G06410	TPS7	4	1_1958602,1_1958605,1_1958650,1_1958651	+	AT1G06410.1,AT1G06410.3,AT1G06410.2	35.0976667,3.533673,0.94564
AT1G06680	PSBP1	20	1_2049226,1_2049264,1_2049265,1_2049272,1_2049273,1_2049274,1_2049275,1_2049289,1_2049293,1_2049294,1_2049295,1_2049311,1_2049312,1_2049313,1_2049314,1_2049315,1_2049320,1_2049321,1_2049322,1_2049339	+	AT1G06680.1,AT1G06680.2	1799.1275004,0.3214846
AT1G07010	AT1G07010	2	1_2155052,1_2155113	+	AT1G07010.1,AT1G07010.2,AT1G07010.3	17.3127712,0.1463168,0.0474154
AT1G07080	AT1G07080	3	1_2171967,1_2171984,1_2171995	+	AT1G07080.1	86.5417592
AT1G07320	RPL4	4	1_2250312,1_2250338,1_2250377,1_2250378	+	AT1G07320.1,AT1G07320.2,AT1G07320.4	325.4883054,18.5438913,0.0224357
AT1G07700	AT1G07700	5	1_2381170,1_2381188,1_2381196,1_2381197,1_2381320	+	AT1G07700.1,AT1G07700.2,AT1G07700.4,AT1G07700.3	24.8142986,16.9257848,0.4975003,0.0875061
AT1G07890	APX1	21	1_2439443,1_2439459,1_2439562,1_2439571,1_2439572,1_2439573,1_2439574,1_2439575,1_2439576,1_2439594,1_2439595,1_2439598,1_2439610,1_2439611,1_2439612,1_2439613,1_2439614,1_2439615,1_2439620,1_2439621,1_2439622	+	AT1G07890.1,AT1G07890.3,AT1G07890.2,AT1G07890.8,AT1G07890.6,AT1G07890.4,AT1G07890.7,AT1G07890.5	747.1104397,383.0246865,10.7777044,4.6038456,4.5600895,3.9813015,1.8562729,0.7663604
AT1G07920	A3	14	1_2457071,1_2457202,1_2457203,1_2457205,1_2457215,1_2457216,1_2457217,1_2457224,1_2457225,1_2457227,1_2457228,1_2457229,1_2457235,1_2457236	+	AT1G07920.1	728.0196941
AT1G07930	A3	17	1_2460533,1_2460641,1_2460642,1_2460643,1_2460644,1_2460645,1_2460646,1_2460647,1_2460648,1_2460649,1_2460655,1_2460656,1_2460658,1_2460666,1_2460667,1_2460674,1_2460675	+	AT1G07930.1,AT1G07930.2	600.9220645,0.3761779
AT1G08110	AT1G08110	9	1_2537769,1_2537779,1_2537780,1_2537781,1_2537786,1_2537821,1_2537822,1_2537825,1_2537902	+	AT1G08110.3,AT1G08110.1,AT1G08110.4,AT1G08110.2	59.4996626,26.4963936,22.4687494,0.6983862
AT1G08360	RPL10AA	14	1_2637766,1_2637767,1_2637768,1_2637771,1_2637772,1_2637777,1_2637778,1_2637804,1_2637805,1_2637809,1_2637810,1_2637825,1_2637848,1_2637849	+	AT1G08360.1	428.8355285
AT1G08480	SDH6	3	1_2685476,1_2685527,1_2685543	+	AT1G08480.1	156.7734106
AT1G08520	CHLD	2	1_2700820,1_2700865	+	AT1G08520.1	83.7647587
AT1G08830	CSD1	3	1_2829187,1_2829224,1_2829225	+	AT1G08830.1,AT1G08830.2	157.316461,0.0793688
AT1G09150	AT1G09150	9	1_2949037,1_2949038,1_2949039,1_2949040,1_2949041,1_2949042,1_2949043,1_2949076,1_2949077	+	AT1G09150.1	42.7824425
AT1G09340	CSP41B	13	1_3018108,1_3018116,1_3018117,1_3018118,1_3018119,1_3018120,1_3018122,1_3018126,1_3018127,1_3018139,1_3018140,1_3018154,1_3018155	+	AT1G09340.1,AT1G09340.2	341.2415075,1.2466962
AT1G09430	ACLA-3	14	1_3045112,1_3045138,1_3045151,1_3045189,1_3045190,1_3045191,1_3045192,1_3045193,1_3045194,1_3045195,1_3045196,1_3045197,1_3045198,1_3045199	+	AT1G09430.1	66.1458857
AT1G09590	RPL21A	15	1_3107636,1_3107637,1_3107638,1_3107639,1_3107640,1_3107641,1_3107642,1_3107643,1_3107644,1_3107647,1_3107722,1_3107723,1_3107724,1_3107725,1_3107730	+	AT1G09590.1	819.9980541
AT1G09640	AT1G09640	7	1_3122189,1_3122305,1_3122310,1_3122323,1_3122324,1_3122348,1_3122359	+	AT1G09640.1,AT1G09640.2	200.9245989,0.0544001
AT1G09740	AT1G09740	2	1_3156207,1_3156236	+	AT1G09740.2,AT1G09740.1	220.2819571,4.7337361
AT1G10670	ACLA-1	13	1_3538131,1_3538161,1_3538162,1_3538168,1_3538196,1_3538213,1_3538221,1_3538238,1_3538239,1_3538240,1_3538241,1_3538244,1_3538245	+	AT1G10670.1,AT1G10670.2,AT1G10670.4,AT1G10670.3	205.6371336,19.168284,2.9814465,0.0420684
AT1G10950	TMN1	6	1_3663763,1_3663793,1_3663794,1_3663795,1_3663805,1_3663858	+	AT1G10950.1	87.3620266
AT1G11430	MORF9	4	1_3848987,1_3849020,1_3849021,1_3849047	+	AT1G11430.1	186.8031543
AT1G11475	NRPB10	2	1_3863848,1_3863946	+	AT1G11475.1	73.5323841
AT1G11650	RBP45B	3	1_3917994,1_3917995,1_3918007	+	AT1G11650.2,AT1G11650.1	227.0660382,0.0419436
AT1G11840	ATGLX1	7	1_3997664,1_3997679,1_3997680,1_3997681,1_3997686,1_3997742,1_3997743	+	AT1G11840.4,AT1G11840.2,AT1G11840.3,AT1G11840.1,AT1G11840.6,AT1G11840.5	238.9032348,208.7231308,110.8325744,55.7554018,5.2428833,0.4957369
AT1G11860	GDCST	7	1_4003245,1_4003287,1_4003326,1_4003327,1_4003328,1_4003329,1_4003330	+	AT1G11860.2,AT1G11860.1,AT1G11860.3	299.3484242,224.8170494,0.4536456
AT1G11890	SEC22	3	1_4012941,1_4013001,1_4013002	+	AT1G11890.1	44.5760438
AT1G12230	AT1G12230	4	1_4150718,1_4150745,1_4150790,1_4150942	+	AT1G12230.1,AT1G12230.2	92.9408911,0.5151505
AT1G12270	HOP1	1	1_4174678	+	AT1G12270.1	43.0673056
AT1G12360	KEU	4	1_4206248,1_4206262,1_4206263,1_4206264	+	AT1G12360.1	22.1140968
AT1G12410	CLPR2	4	1_4224997,1_4224998,1_4224999,1_4225038	+	AT1G12410.1	162.3562431
AT1G12470	AT1G12470	3	1_4257308,1_4257309,1_4257312	+	AT1G12470.1	14.9083775
AT1G12760	AT1G12760	1	1_4350595	+	AT1G12760.1,AT1G12760.2	46.517146,0
AT1G12840	VHA-C	10	1_4378252,1_4378306,1_4378366,1_4378371,1_4378372,1_4378373,1_4378374,1_4378375,1_4378376,1_4378443	+	AT1G12840.1	84.2149491
AT1G13060	PBE1	6	1_4454713,1_4454725,1_4454742,1_4454761,1_4454773,1_4454791	+	AT1G13060.1,AT1G13060.3,AT1G13060.2	152.8008903,0.0158987,0.0084687
AT1G14150	PNSL2	2	1_4840704,1_4840705	+	AT1G14150.1	44.7943642
AT1G14320	RPL10A	19	1_4889501,1_4889504,1_4889505,1_4889506,1_4889507,1_4889508,1_4889509,1_4889510,1_4889511,1_4889512,1_4889537,1_4889538,1_4889539,1_4889540,1_4889553,1_4889554,1_4889555,1_4889556,1_4889557	+	AT1G14320.1,AT1G14320.2	1434.2875469,1.05548
AT1G15120	AT1G15120	22	1_5203958,1_5203960,1_5203982,1_5203983,1_5203984,1_5203985,1_5203986,1_5203987,1_5203989,1_5204029,1_5204033,1_5204042,1_5204044,1_5204045,1_5204046,1_5204059,1_5204060,1_5204061,1_5204062,1_5204063,1_5204064,1_5204065	+	AT1G15120.1,AT1G15120.2	159.6567849,0.0458139
AT1G15500	AATP2	4	1_5328802,1_5328808,1_5328821,1_5328831	+	AT1G15500.1	168.7266016
AT1G15690	AVP1	11	1_5402272,1_5402279,1_5402280,1_5402302,1_5402303,1_5402306,1_5402309,1_5402325,1_5402326,1_5402382,1_5402383	+	AT1G15690.1,AT1G15690.2	427.7635468,1.7364132
AT1G15740	AT1G15740	1	1_5414850	+	AT1G15740.1	28.4880914
AT1G15930	RPS12A	22	1_5471647,1_5471665,1_5471675,1_5472769,1_5472797,1_5472848,1_5472853,1_5472856,1_5472857,1_5472869,1_5472870,1_5472871,1_5472878,1_5472879,1_5472880,1_5472881,1_5472882,1_5472888,1_5472889,1_5472890,1_5472891,1_5472895	+	AT1G15930.1,AT1G15930.2	14.4120451,521.0835569
AT1G15950	CCR1	5	1_5481980,1_5482027,1_5482038,1_5482040,1_5482132	+	AT1G15950.1,AT1G15950.2	117.0316056,0.0060233
AT1G16080	AT1G16080	2	1_5515848,1_5515858	+	AT1G16080.1	71.2493707
AT1G16180	AT1G16180	11	1_5542752,1_5542753,1_5542755,1_5542764,1_5542765,1_5542766,1_5542767,1_5542768,1_5542769,1_5542794,1_5542801	+	AT1G16180.2,AT1G16180.1	81.353615,50.016653
AT1G16700	AT1G16700	8	1_5711726,1_5711739,1_5711784,1_5711785,1_5711799,1_5711801,1_5711802,1_5711864	+	AT1G16700.1	123.6917978
AT1G16720	HCF173	12	1_5726319,1_5726320,1_5726321,1_5726322,1_5726323,1_5726327,1_5726328,1_5726329,1_5726330,1_5726366,1_5726367,1_5726368	+	AT1G16720.1	50.4514355
AT1G16810	AT1G16810	3	1_5756771,1_5756772,1_5756773	+	AT1G16810.2,AT1G16810.1	78.0969289,0.6155042
AT1G16880	ACR11	18	1_5776184,1_5776185,1_5776186,1_5776187,1_5776188,1_5776192,1_5776193,1_5776194,1_5776206,1_5776207,1_5776222,1_5776223,1_5776224,1_5776228,1_5776229,1_5776259,1_5776260,1_5776266	+	AT1G16880.1	145.5493712
AT1G17050	SPS2	2	1_5831285,1_5831306	+	AT1G17050.1	24.138647
AT1G17130	AT1G17130	3	1_5856524,1_5856525,1_5856550	+	AT1G17130.1,AT1G17130.2	21.7344364,4.6988462
AT1G17200	AT1G17200	2	1_5879922,1_5879934	+	AT1G17200.1,AT1G17200.2	89.0049573,0.0929504
AT1G17220	FUG1	7	1_5890336,1_5890337,1_5890338,1_5890339,1_5890343,1_5890344,1_5890349	+	AT1G17220.1	58.1094152
AT1G17290	ALAAT1	6	1_5926133,1_5926163,1_5926248,1_5926249,1_5926250,1_5926251	+	AT1G17290.1	78.4993295
AT1G17470	DRG1	9	1_6006279,1_6006293,1_6006294,1_6006295,1_6006296,1_6006297,1_6006298,1_6006299,1_6006300	+	AT1G17470.1,AT1G17470.2	68.4065149,1.9713679
AT1G17570	AT1G17570	4	1_6038791,1_6038792,1_6038804,1_6038822	+	AT1G17570.1	NA
AT1G18080	RACK1A	7	1_6223963,1_6223967,1_6223969,1_6223970,1_6223971,1_6223982,1_6223998	+	AT1G18080.1	694.7863631
AT1G18660	AT1G18660	6	1_6425733,1_6425751,1_6425752,1_6425753,1_6425754,1_6425812	+	AT1G18660.1,AT1G18660.3,AT1G18660.2,AT1G18660.4	11.4431538,4.5230167,3.007117,0.0719379
AT1G18730	PNSB4	3	1_6462164,1_6462180,1_6462181	+	AT1G18730.1,AT1G18730.3,AT1G18730.4,AT1G18730.2,AT1G18730.5	22.3638359,20.1877781,0.4641407,0.1634676,0.082631
AT1G18820	AT1G18820	1	1_6488719	+	AT1G18820.1	NA
AT1G19910	VHA-C2	30	1_6913287,1_6913296,1_6913716,1_6914389,1_6914404,1_6914405,1_6914406,1_6914407,1_6914411,1_6914475,1_6914476,1_6914477,1_6914478,1_6914479,1_6914482,1_6914483,1_6914484,1_6914486,1_6914487,1_6914488,1_6914491,1_6914492,1_6914495,1_6914496,1_6914497,1_6914498,1_6914499,1_6914511,1_6914512,1_6914516	+	AT1G19910.1,AT1G19910.2	479.1335565,0.5774646
AT1G20020	LFNR2	13	1_6944918,1_6944942,1_6944943,1_6944947,1_6944952,1_6944953,1_6944954,1_6944955,1_6944957,1_6944959,1_6944960,1_6944965,1_6944987	+	AT1G20020.1,AT1G20020.2,AT1G20020.3	242.9697949,6.8218692,0.0170166
AT1G20090	ARAC4	1	1_6968843	+	AT1G20090.1	64.8771556
AT1G20110	AT1G20110	3	1_6974647,1_6974710,1_6974755	+	AT1G20110.1	47.7456078
AT1G20260	VHA-B3	12	1_7020329,1_7020330,1_7020429,1_7020430,1_7020431,1_7020460,1_7020474,1_7020475,1_7020476,1_7020477,1_7020487,1_7020488	+	AT1G20260.1	141.2514846
AT1G20620	CAT3	3	1_7146327,1_7146328,1_7146356	+	AT1G20620.1,AT1G20620.6,AT1G20620.2,AT1G20620.5,AT1G20620.4,AT1G20620.7	582.0838618,1.4757001,0.5288053,0.4636155,0.4032816,0.1685886
AT1G20693	HMGB2	4	1_7178601,1_7178661,1_7178700,1_7178701	+	AT1G20693.1,AT1G20693.2,AT1G20693.3	290.6840528,0.0975804,0.0444572
AT1G20696	HMGB3	6	1_7181275,1_7181276,1_7181277,1_7181310,1_7181380,1_7181381	+	AT1G20696.1,AT1G20696.5,AT1G20696.4,AT1G20696.3,AT1G20696.2	162.4500523,0.8051622,0.2230733,0.0138743,0
AT1G20810	FKBP18	1	1_7233491	+	AT1G20810.1,AT1G20810.2	16.7042535,1.4904973
AT1G21065	AT1G21065	6	1_7375702,1_7375717,1_7375723,1_7375724,1_7375750,1_7375763	+	AT1G21065.1	64.7330379
AT1G21630	AT1G21630	1	1_7588042	+	AT1G21630.1,AT1G21630.3,AT1G21630.2,AT1G21630.4	26.9204442,0.0292646,0.0145687,0
AT1G21640	NADK2	1	1_7592778	+	AT1G21640.1,AT1G21640.2	19.3062574,0.0562621
AT1G21660	AT1G21660	1	1_7608935	+	AT1G21660.1	30.5017847
AT1G21720	PBC1	3	1_7628127,1_7628169,1_7628170	+	AT1G21720.1	91.3207556
AT1G21930	AT1G21930	3	1_7714334,1_7714335,1_7714374	+	AT1G21930.1	37.1312328
AT1G22410	AT1G22410	8	1_7914785,1_7914786,1_7914794,1_7914812,1_7914813,1_7914814,1_7914815,1_7914816	+	AT1G22410.1	222.293504
AT1G22450	COX6B-1	5	1_7926927,1_7926990,1_7926991,1_7926992,1_7926993	+	AT1G22450.1	140.4293612
AT1G22750	AT1G22750	6	1_8052811,1_8052815,1_8052839,1_8052840,1_8052854,1_8052855	+	AT1G22750.4,AT1G22750.2,AT1G22750.3,AT1G22750.1	21.6324469,14.5983829,11.926616,8.1514397
AT1G22780	RPS18A	17	1_8069207,1_8069215,1_8069234,1_8069235,1_8069247,1_8069248,1_8069249,1_8069250,1_8069251,1_8069252,1_8069257,1_8069267,1_8069273,1_8069274,1_8069275,1_8069276,1_8069290	+	AT1G22780.1	540.127389
AT1G22840	CYTC-1	11	1_8080352,1_8080387,1_8080388,1_8080389,1_8080398,1_8080402,1_8080443,1_8080444,1_8080445,1_8080446,1_8080452	+	AT1G22840.1,AT1G22840.2	564.5803023,0.0097595
AT1G23190	PGM3	4	1_8224245,1_8224246,1_8224247,1_8224253	+	AT1G23190.1	90.8668386
AT1G23290	RPL27AB	22	1_8263482,1_8263483,1_8263485,1_8263486,1_8263487,1_8263488,1_8263489,1_8263490,1_8263491,1_8263497,1_8263502,1_8263504,1_8263509,1_8263510,1_8263511,1_8263517,1_8263525,1_8263526,1_8263527,1_8263528,1_8263529,1_8263530	+	AT1G23290.1	786.9921007
AT1G23490	ARF2-A	16	1_8338477,1_8338478,1_8338479,1_8338501,1_8338502,1_8338503,1_8338507,1_8338508,1_8338509,1_8338512,1_8338538,1_8338539,1_8338540,1_8338541,1_8338546,1_8338549	+	AT1G23490.1	225.6848424
AT1G24050	AT1G24050	12	1_8508562,1_8508569,1_8508617,1_8508637,1_8508660,1_8508714,1_8508715,1_8508716,1_8508717,1_8508718,1_8508741,1_8508744	+	AT1G24050.1	114.1180941
AT1G24360	AT1G24360	3	1_8643391,1_8643404,1_8643433	+	AT1G24360.1	160.4224196
AT1G25280	TULP10	6	1_8866720,1_8866721,1_8866722,1_8866723,1_8866724,1_8866727	+	AT1G25280.1,AT1G25280.2	23.85961,0.1045411
AT1G25520	AT1G25520	1	1_8964331	+	AT1G25520.1	35.2574432
AT1G26550	AT1G26550	9	1_9172787,1_9172789,1_9172790,1_9172823,1_9172852,1_9172853,1_9172868,1_9172869,1_9172899	+	AT1G26550.1	309.297668
AT1G26630	ELF5A-2	22	1_9205900,1_9205901,1_9205902,1_9205903,1_9205904,1_9205905,1_9205906,1_9205963,1_9207169,1_9207200,1_9207202,1_9207203,1_9207207,1_9207208,1_9207222,1_9207250,1_9207251,1_9207265,1_9207273,1_9207274,1_9207275,1_9207276	+	AT1G26630.1,AT1G26630.2	1184.9323022,2.1091548
AT1G26670	VTI12	7	1_9217895,1_9217896,1_9217897,1_9217898,1_9217901,1_9217902,1_9217903	+	AT1G26670.1	50.0503666
AT1G27000	AT1G27000	7	1_9376612,1_9376613,1_9376614,1_9376615,1_9376616,1_9376627,1_9376644	+	AT1G27000.1	104.3550924
AT1G27330	AT1G27330	3	1_9494001,1_9494008,1_9494009	+	AT1G27330.1	95.1279657
AT1G27400	RPL17A	7	1_9516743,1_9516770,1_9516775,1_9516783,1_9516789,1_9516793,1_9516794	+	AT1G27400.1	366.8064797
AT1G27450	APT1	8	1_9533857,1_9533858,1_9533859,1_9533872,1_9533873,1_9533956,1_9533965,1_9534037	+	AT1G27450.4,AT1G27450.1,AT1G27450.2,AT1G27450.3	355.3565652,24.4484943,1.9985924,0.9438364
AT1G27695	AT1G27695	6	1_9640059,1_9640063,1_9640064,1_9640065,1_9640069,1_9640070	+	AT1G27695.1,AT1G27695.2	12.7383595,0.1575299
AT1G27950	LTPG1	4	1_9742065,1_9742079,1_9742080,1_9742081	+	AT1G27950.1	199.1303235
AT1G27970	NTF2	17	1_9747764,1_9747878,1_9747879,1_9747891,1_9747895,1_9747952,1_9747957,1_9747959,1_9747960,1_9747961,1_9747962,1_9747967,1_9747970,1_9747971,1_9747972,1_9747977,1_9747978	+	AT1G27970.1,AT1G27970.2	114.1364755,4.7674796
AT1G28250	AT1G28250	1	1_9875445	+	AT1G28250.1	30.6159505
AT1G29070	RPL34	16	1_10151190,1_10151191,1_10151192,1_10151199,1_10151200,1_10151201,1_10151203,1_10151204,1_10151205,1_10151206,1_10151207,1_10151249,1_10151258,1_10151260,1_10151320,1_10151321	+	AT1G29070.1	413.0095957
AT1G29150	RPN6	4	1_10182558,1_10182591,1_10182592,1_10182619	+	AT1G29150.1,AT1G29150.2	93.3863775,0.0881403
AT1G29850	AT1G29850	13	1_10449649,1_10449733,1_10449734,1_10449735,1_10449736,1_10449737,1_10449746,1_10449747,1_10449748,1_10449749,1_10449750,1_10449751,1_10449755	+	AT1G29850.1,AT1G29850.2,AT1G29850.3	28.8660885,23.6292536,0.1793296
AT1G29930	LHCB1.3	11	1_10478896,1_10478897,1_10478898,1_10478899,1_10478901,1_10478903,1_10478905,1_10478910,1_10478960,1_10478973,1_10478974	+	AT1G29930.1	15488.014423
AT1G29990	PFD6	3	1_10508922,1_10508963,1_10508997	+	AT1G29990.1	67.3903268
AT1G30230	AT1G30230	24	1_10640584,1_10640589,1_10640590,1_10640592,1_10640593,1_10640608,1_10640609,1_10640612,1_10640618,1_10640619,1_10640626,1_10640639,1_10640640,1_10640641,1_10640642,1_10640643,1_10640645,1_10640647,1_10640648,1_10640649,1_10640650,1_10640651,1_10640652,1_10640657	+	AT1G30230.1,AT1G30230.2	456.4099494,0.4946014
AT1G30380	PSAK	19	1_10723029,1_10723045,1_10723055,1_10723056,1_10723057,1_10723058,1_10723059,1_10723060,1_10723066,1_10723067,1_10723068,1_10723072,1_10723074,1_10723081,1_10723082,1_10723083,1_10723090,1_10723091,1_10723101	+	AT1G30380.1	2005.2918203
AT1G30400	ABCC1	5	1_10737736,1_10737747,1_10737758,1_10737774,1_10737775	+	AT1G30400.1,AT1G30400.2	53.6960514,2.6026722
AT1G31170	SRX	3	1_11134330,1_11134331,1_11134364	+	AT1G31170.2,AT1G31170.1,AT1G31170.3,AT1G31170.5,AT1G31170.4	24.2924858,2.3523824,0.7127502,1.3428961,0
AT1G31300	AT1G31300	1	1_11196084	+	AT1G31300.1,AT1G31300.2,AT1G31300.3	14.4105212,5.365774,0.5022587
AT1G31420	FEI1	3	1_11253819,1_11253820,1_11253821	+	AT1G31420.2,AT1G31420.1,AT1G31420.3	24.5427184,24.0236776,0.5479243
AT1G31910	AT1G31910	4	1_11461767,1_11461776,1_11461779,1_11461780	+	AT1G31910.2,AT1G31910.1	70.3323409,15.1572089
AT1G31970	RH5	1	1_11482776	+	AT1G31970.1	50.8147516
AT1G32050	SCAMP4	8	1_11531084,1_11531165,1_11531211,1_11531212,1_11531213,1_11531214,1_11531215,1_11531216	+	AT1G32050.1	119.8424735
AT1G32060	PRK	5	1_11534484,1_11534495,1_11534496,1_11534559,1_11534560	+	AT1G32060.1	309.6288442
AT1G32230	RCD1	4	1_11616110,1_11616112,1_11616113,1_11616149	+	AT1G32230.1,AT1G32230.2,AT1G32230.3,AT1G32230.5,AT1G32230.6,AT1G32230.4	38.6098196,28.8344206,1.194696,0.6480859,0.1517394,0.0952584
AT1G32310	AT1G32310	1	1_11654636	+	AT1G32310.1	20.5377883
AT1G32440	PKP3	9	1_11715014,1_11715033,1_11715034,1_11715035,1_11715036,1_11715037,1_11715038,1_11715039,1_11715040	+	AT1G32440.1	27.9857872
AT1G32460	AT1G32460	7	1_11739216,1_11739217,1_11739220,1_11739227,1_11739228,1_11739229,1_11739230	+	AT1G32460.1	146.6610871
AT1G32990	RPL11	9	1_11957180,1_11957181,1_11957190,1_11957194,1_11957195,1_11957196,1_11957197,1_11957200,1_11957273	+	AT1G32990.1	252.3838975
AT1G33040	NACA5	2	1_11967747,1_11967787	+	AT1G33040.1	122.074053
AT1G33120	RPL9B	11	1_12012276,1_12012277,1_12012295,1_12012297,1_12012304,1_12012307,1_12012319,1_12012336,1_12012337,1_12012345,1_12012357	+	AT1G33120.1	597.5608823
AT1G33140	RPL9B	17	1_12024552,1_12024557,1_12024558,1_12024568,1_12024571,1_12024610,1_12024626,1_12024627,1_12024628,1_12024629,1_12024630,1_12024631,1_12024632,1_12024633,1_12024634,1_12024645,1_12024646	+	AT1G33140.1	1001.4459038
AT1G33810	AT1G33810	10	1_12266730,1_12266731,1_12266732,1_12266733,1_12266742,1_12266743,1_12266744,1_12266745,1_12266746,1_12266750	+	AT1G33810.1	121.0849206
AT1G33990	MES14	4	1_12357963,1_12357964,1_12357965,1_12357971	+	AT1G33990.1	52.9749921
AT1G35160	GRF4	5	1_12868590,1_12868591,1_12868597,1_12868712,1_12868713	+	AT1G35160.1,AT1G35160.2	164.2329671,0.2195642
AT1G35460	BHLH80	5	1_13041939,1_13041940,1_13041941,1_13041956,1_13041957	+	AT1G35460.1,AT1G35460.2	10.9851832,0.0892328
AT1G35680	RPL21	16	1_13210273,1_13210274,1_13210316,1_13210317,1_13210318,1_13210321,1_13210334,1_13210337,1_13210338,1_13210339,1_13210340,1_13210341,1_13210342,1_13210343,1_13210344,1_13210361	+	AT1G35680.1	365.3100507
AT1G36050	AT1G36050	2	1_13453157,1_13453180	+	AT1G36050.2	34.4428058
AT1G36160	ACC1	3	1_13543897,1_13543898,1_13543903	+	AT1G36160.2,AT1G36160.1	36.3957966,0.6687106
AT1G36320	AT1G36320	1	1_13673988	+	AT1G36320.1	40.2029807
AT1G36980	AT1G36980	15	1_14026810,1_14026877,1_14026878,1_14026879,1_14026880,1_14026881,1_14026882,1_14026883,1_14026884,1_14026890,1_14026891,1_14026898,1_14026899,1_14026900,1_14026902	+	AT1G36980.2,AT1G36980.1	147.8105185,0.4907771
AT1G42960	AT1G42960	11	1_16127159,1_16127160,1_16127173,1_16127174,1_16127175,1_16127176,1_16127178,1_16127184,1_16127185,1_16127186,1_16127188	+	AT1G42960.1	226.3066718
AT1G42970	GAPB	15	1_16129607,1_16129608,1_16129609,1_16129610,1_16129634,1_16129635,1_16129641,1_16129650,1_16129651,1_16129653,1_16129656,1_16129657,1_16129658,1_16129670,1_16129701	+	AT1G42970.1	631.8541631
AT1G43170	ARP1	12	1_16268674,1_16268675,1_16268680,1_16268684,1_16268692,1_16268708,1_16268720,1_16268755,1_16268756,1_16268767,1_16268813,1_16268815	+	AT1G43170.8,AT1G43170.2,AT1G43170.3,AT1G43170.7,AT1G43170.1,AT1G43170.9,AT1G43170.5,AT1G43170.4,AT1G43170.6	585.5392801,437.5628905,5.1698904,4.9720091,4.5121275,2.9115529,0.2430071,0.0824821,0.0662581
AT1G43670	AT1G43670	9	1_16470394,1_16470395,1_16470396,1_16470397,1_16470398,1_16470402,1_16470409,1_16470410,1_16470442	+	AT1G43670.1	56.7557185
AT1G43890	RABC1	3	1_16648419,1_16648463,1_16648568	+	AT1G43890.2,AT1G43890.1,AT1G43890.3	103.1654589,25.3951206,2.2183135
AT1G44575	PSBS	23	1_16873211,1_16873212,1_16873213,1_16873217,1_16873225,1_16873227,1_16873228,1_16873236,1_16873237,1_16873238,1_16873239,1_16873240,1_16873241,1_16873261,1_16873267,1_16873268,1_16873270,1_16873277,1_16873280,1_16873281,1_16873284,1_16873285,1_16873287	+	AT1G44575.1,AT1G44575.2,AT1G44575.3	919.0436225,1.239784,0.1946258
AT1G45474	LHCA5	7	1_17180490,1_17180714,1_17180715,1_17180752,1_17180775,1_17180776,1_17180778	+	AT1G45474.1,AT1G45474.2	44.9629559,58.1826317
AT1G45688	AT1G45688	1	1_17193127	+	AT1G45688.1,AT1G45688.2	91.8574556,1.3817764
AT1G47490	RBP47C	1	1_17427325	+	AT1G47490.1,AT1G47490.2	44.4263272,3.3996772
AT1G47530	AT1G47530	1	1_17454299	+	AT1G47530.1,AT1G47530.2	104.7411499,0.2097098
AT1G48230	AT1G48230	1	1_17808707	+	AT1G48230.1,AT1G48230.2	35.9573899,0.6926859
AT1G48350	RPL18	11	1_17868220,1_17868221,1_17868222,1_17868224,1_17868235,1_17868236,1_17868237,1_17868238,1_17868255,1_17868256,1_17868257	+	AT1G48350.1	498.5348337
AT1G48440	AT1G48440	9	1_17908388,1_17908398,1_17908405,1_17908409,1_17908410,1_17908441,1_17908452,1_17908462,1_17908493	+	AT1G48440.1	156.4663817
AT1G48600	NMT2	7	1_17969090,1_17969158,1_17969168,1_17969183,1_17969203,1_17969212,1_17969221	+	AT1G48600.1,AT1G48600.2	167.3813871,2.0734177
AT1G48920	NUCL1	3	1_18101498,1_18101529,1_18101563	+	AT1G48920.1	333.8165129
AT1G49240	ACT8	23	1_18218018,1_18218019,1_18218020,1_18218032,1_18218033,1_18218054,1_18218055,1_18218098,1_18218099,1_18218111,1_18218177,1_18218181,1_18218183,1_18218185,1_18218186,1_18218187,1_18218189,1_18218190,1_18218191,1_18218194,1_18218195,1_18218197,1_18218198	+	AT1G49240.1	364.472392
AT1G49300	RABG3E	4	1_18237067,1_18237068,1_18237069,1_18237171	+	AT1G49300.1	61.2349629
AT1G49760	PAB8	1	1_18419924	+	AT1G49760.1	126.3604979
AT1G50010	TUBA4	2	1_18519803,1_18519804	+	AT1G50010.1	434.1325918
AT1G50920	AT1G50920	3	1_18872798,1_18872811,1_18872826	+	AT1G50920.1	83.9360038
AT1G51070	BHLH115	2	1_18929573,1_18929585	+	AT1G51070.1,AT1G51070.2	156.1292096,0.1057927
AT1G51160	AT1G51160	2	1_18951708,1_18951737	+	AT1G51160.1,AT1G51160.2,AT1G51160.3	31.6979881,19.4591974,3.8650526
AT1G51200	SAP2	25	1_18986336,1_18986337,1_18986338,1_18986364,1_18986365,1_18986372,1_18986373,1_18986374,1_18986375,1_18986377,1_18986378,1_18986383,1_18986384,1_18986385,1_18986471,1_18986485,1_18986486,1_18986498,1_18986506,1_18986518,1_18986519,1_18986520,1_18986521,1_18986522,1_18986523	+	AT1G51200.1,AT1G51200.2,AT1G51200.4,AT1G51200.3	193.6171547,8.2480623,4.8391573,0.8091455
AT1G51650	AT1G51650	24	1_19153707,1_19153708,1_19153709,1_19153713,1_19153714,1_19153715,1_19153717,1_19153718,1_19153719,1_19153735,1_19153790,1_19153798,1_19153800,1_19153810,1_19153811,1_19153813,1_19153814,1_19153816,1_19153824,1_19153825,1_19153826,1_19153827,1_19153828,1_19153840	+	AT1G51650.1	639.4716155
AT1G51690	PP2AB1	1	1_19170312	+	AT1G51690.2,AT1G51690.5,AT1G51690.1,AT1G51690.4,AT1G51690.3	24.7139407,6.6381769,0.1429221,0.0030141,0
AT1G52230	PSAH2	11	1_19455554,1_19455555,1_19455556,1_19455566,1_19455574,1_19455576,1_19455592,1_19455593,1_19455602,1_19455604,1_19455605	+	AT1G52230.1	1277.8858987
AT1G52347	AT1G52347	1	1_19497561	+	AT1G52347.1,AT1G52347.2	NA
AT1G52600	AT1G52600	3	1_19592576,1_19592620,1_19592621	+	AT1G52600.1	46.3765232
AT1G52740	HTA9	20	1_19646332,1_19646333,1_19646334,1_19646335,1_19646336,1_19646337,1_19646338,1_19646339,1_19646355,1_19646357,1_19646358,1_19646359,1_19646360,1_19646386,1_19646387,1_19646388,1_19646390,1_19646395,1_19646396,1_19646408	+	AT1G52740.1	283.9669499
AT1G52870	AT1G52870	6	1_19687788,1_19687805,1_19687818,1_19687820,1_19687821,1_19687832	+	AT1G52870.2,AT1G52870.1	21.3191405,0.9776152
AT1G52980	NUG2	4	1_19740257,1_19740258,1_19740259,1_19740266	+	AT1G52980.1	55.2112878
AT1G53210	AT1G53210	8	1_19847589,1_19847590,1_19847625,1_19847646,1_19847647,1_19847676,1_19847677,1_19847678	+	AT1G53210.1	126.2902541
AT1G53670	MSRB1	5	1_20038147,1_20038156,1_20038160,1_20038164,1_20038165	+	AT1G53670.1,AT1G53670.2	63.3409711,0.0235844
AT1G54030	MVP1	4	1_20169510,1_20169524,1_20169564,1_20169574	+	AT1G54030.1,AT1G54030.2	102.4402815,3.0219972
AT1G54210	ATG12A	2	1_20242477,1_20242478	+	AT1G54210.1,AT1G54210.2	7.8336188,0.2338171
AT1G54270	TIF4A-2	2	1_20262074,1_20262117	+	AT1G54270.1,AT1G54270.2	126.2707665,0.0421647
AT1G54490	XRN4	2	1_20356832,1_20356833	+	AT1G54490.1,AT1G54490.2	21.0902,0.0673818
AT1G54520	AT1G54520	7	1_20365911,1_20365959,1_20365960,1_20365961,1_20365962,1_20365963,1_20365964	+	AT1G54520.1	43.1301872
AT1G54580	ACP2	9	1_20390724,1_20390776,1_20390777,1_20390778,1_20390779,1_20390855,1_20390919,1_20390920,1_20390921	+	AT1G54580.1	261.3172094
AT1G54780	TLP18.3	9	1_20440915,1_20441001,1_20441002,1_20441019,1_20441048,1_20441050,1_20441051,1_20441052,1_20441053	+	AT1G54780.1	189.6993768
AT1G55000	AT1G55000	3	1_20516348,1_20516380,1_20516408	+	AT1G55000.1,AT1G55000.3,AT1G55000.2	21.9204637,2.0655454,1.5372282
AT1G55160	AT1G55160	1	1_20579944	+	AT1G55160.1,AT1G55160.2,AT1G55160.3	20.3496699,10.2551241,0.0164402
AT1G55480	ZKT	1	1_20715412	+	AT1G55480.1	74.0445397
AT1G55840	AT1G55840	2	1_20876164,1_20876199	+	AT1G55840.1,AT1G55840.2	37.0247888,1.9783251
AT1G56045	RPL41E	18	1_20963292,1_20963293,1_20963338,1_20963359,1_20963379,1_20963380,1_20963381,1_20963382,1_20963384,1_20963400,1_20963412,1_20963414,1_20963420,1_20963423,1_20963424,1_20963425,1_20963426,1_20963427	+	AT1G56045.1	402.2166522
AT1G56190	AT1G56190	8	1_21030516,1_21030517,1_21030529,1_21030542,1_21030543,1_21030567,1_21030568,1_21030574	+	AT1G56190.1,AT1G56190.2	102.9592331,8.2285499
AT1G56200	emb1303	10	1_21031910,1_21031911,1_21031912,1_21031943,1_21031944,1_21031945,1_21031973,1_21031987,1_21031999,1_21032009	+	AT1G56200.1,AT1G56200.2	248.7339224,0.2465322
AT1G56450	PBG1	13	1_21144237,1_21144278,1_21144279,1_21144291,1_21144292,1_21144298,1_21144299,1_21144300,1_21144301,1_21144302,1_21144335,1_21144336,1_21144337	+	AT1G56450.1	107.5847812
AT1G56700	AT1G56700	5	1_21257650,1_21257677,1_21257678,1_21257679,1_21257689	+	AT1G56700.1,AT1G56700.4,AT1G56700.2,AT1G56700.3	72.5369689,0.9421111,0.3434188,0.0622607
AT1G57660	RPL21F	15	1_21356383,1_21356427,1_21356428,1_21356429,1_21356430,1_21356431,1_21356432,1_21356433,1_21356434,1_21356447,1_21356448,1_21356449,1_21356450,1_21356451,1_21356452	+	AT1G57660.1	545.201397
AT1G57720	AT1G57720	14	1_21380189,1_21380198,1_21380199,1_21380200,1_21380235,1_21380244,1_21380245,1_21380246,1_21380247,1_21380250,1_21380251,1_21380253,1_21380254,1_21380255	+	AT1G57720.1,AT1G57720.2	165.6912051,92.3063062
AT1G57765	AT1G57765	1	1_21394905	+	AT1G57765.1,AT1G57765.2	24.1081602,0
AT1G59610	DRP2B	3	1_21900843,1_21900884,1_21900964	+	AT1G59610.1	36.4707101
AT1G59900	E1 ALPHA	3	1_22053779,1_22053780,1_22053800	+	AT1G59900.1	86.1757563
AT1G60950	FD2	2	1_22445117,1_22445133	+	AT1G60950.1	1087.6590991
AT1G61150	AT1G61150	1	1_22544535	+	AT1G61150.6,AT1G61150.5,AT1G61150.1,AT1G61150.10,AT1G61150.4,AT1G61150.2,AT1G61150.3,AT1G61150.11,AT1G61150.9,AT1G61150.7,AT1G61150.8	14.4108836,14.2880876,5.364255,2.2484637,1.4947496,1.4107213,0.7389875,0.5960446,0.263825,0.1692431,0.0829392
AT1G61250	SCAMP3	4	1_22588710,1_22588716,1_22588717,1_22588799	+	AT1G61250.1,AT1G61250.2	66.9748821,0.0433372
AT1G61520	LHCA3	28	1_22701194,1_22701195,1_22701196,1_22701197,1_22701198,1_22701199,1_22701201,1_22701205,1_22701221,1_22701227,1_22701228,1_22701231,1_22701232,1_22701233,1_22701238,1_22701239,1_22701256,1_22701260,1_22701261,1_22701262,1_22701263,1_22701265,1_22701266,1_22701267,1_22701268,1_22701269,1_22701270,1_22701271	+	AT1G61520.1,AT1G61520.2	1702.6796165,8.4450401
AT1G61620	AT1G61620	1	1_22739310	+	AT1G61620.1	34.4402422
AT1G61770	C50	5	1_22812421,1_22812431,1_22812432,1_22812480,1_22812495	+	AT1G61770.1	36.289233
AT1G61790	OST3B	8	1_22815472,1_22815473,1_22815546,1_22815557,1_22815558,1_22815578,1_22815579,1_22815580	+	AT1G61790.1	19.1520108
AT1G62040	ATG8C	3	1_22934290,1_22934303,1_22934310	+	AT1G62040.1,AT1G62040.2	27.8716118,0.2121074
AT1G62740	HOP2	5	1_23233417,1_23233418,1_23233425,1_23233426,1_23233427	+	AT1G62740.1	35.8438816
AT1G63940	MDAR6	1	1_23733713	+	AT1G63940.1,AT1G63940.2,AT1G63940.3,AT1G63940.4	127.0958624,41.2198899,1.506355,0.9157358
AT1G63980	AT1G63980	5	1_23743121,1_23743150,1_23743197,1_23743215,1_23743221	+	AT1G63980.1,AT1G63980.2	36.8143381,1.6868695
AT1G64090	RTNLB3	20	1_23790698,1_23790739,1_23790740,1_23790741,1_23790742,1_23790743,1_23790744,1_23790745,1_23790746,1_23790748,1_23790749,1_23790790,1_23790791,1_23790794,1_23790795,1_23790796,1_23790797,1_23790798,1_23790799,1_23790800	+	AT1G64090.1,AT1G64090.2	112.808883,0.0051115
AT1G64230	UBC28	42	1_23833568,1_23833569,1_23833575,1_23833577,1_23833578,1_23833579,1_23833580,1_23833581,1_23833582,1_23833584,1_23833585,1_23833586,1_23833587,1_23833588,1_23833589,1_23835151,1_23835153,1_23835257,1_23835258,1_23835259,1_23835260,1_23835261,1_23835332,1_23835333,1_23835336,1_23835337,1_23835338,1_23835340,1_23835341,1_23835342,1_23835343,1_23835344,1_23835345,1_23835346,1_23835347,1_23835348,1_2…	+	AT1G64230.1,AT1G64230.2,AT1G64230.5,AT1G64230.3,AT1G64230.4	314.9533871,2.0020331,0.7979778,0.1555146,0.0594046
AT1G64520	RPN12A	6	1_23958159,1_23958162,1_23958193,1_23958228,1_23958231,1_23958232	+	AT1G64520.1	152.21821
AT1G64550	ABCF3	1	1_23973499	+	AT1G64550.1	48.1366649
AT1G64680	AT1G64680	4	1_24037154,1_24037195,1_24037211,1_24037220	+	AT1G64680.1,AT1G64680.2	49.9836425,1.5210959
AT1G64770	PNSB2	2	1_24059469,1_24059470	+	AT1G64770.1,AT1G64770.3	53.1787925,0.0043136
AT1G64860	SIGA	5	1_24100761,1_24100843,1_24100850,1_24100851,1_24100852	+	AT1G64860.1,AT1G64860.2	24.8253645,1.0123679
AT1G65230	AT1G65230	2	1_24230743,1_24230804	+	AT1G65230.1	32.0076312
AT1G65260	VIPP1	8	1_24240446,1_24240461,1_24240480,1_24240524,1_24240557,1_24240566,1_24240567,1_24240639	+	AT1G65260.1,AT1G65260.2	75.9632695,0.1474823
AT1G65270	AT1G65270	4	1_24244874,1_24244875,1_24244942,1_24244948	+	AT1G65270.1,AT1G65270.2,AT1G65270.3	46.6945423,21.0447143,8.3967344
AT1G65820	AT1G65820	14	1_24486772,1_24486773,1_24486788,1_24486789,1_24486790,1_24486814,1_24486818,1_24486825,1_24486831,1_24486832,1_24486833,1_24486834,1_24486835,1_24486836	+	AT1G65820.1,AT1G65820.2,AT1G65820.3	340.7848995,0.0747763,0.0681246
AT1G65840	PAO4	3	1_24492820,1_24492843,1_24492844	+	AT1G65840.1	82.8307286
AT1G65930	CICDH	16	1_24541977,1_24541978,1_24541979,1_24541980,1_24541981,1_24541982,1_24541983,1_24541984,1_24541998,1_24541999,1_24542000,1_24542001,1_24542002,1_24542009,1_24542022,1_24542029	+	AT1G65930.1	356.0822223
AT1G65960	GAD2	16	1_24557344,1_24557347,1_24557348,1_24557372,1_24557373,1_24557374,1_24557384,1_24557385,1_24557386,1_24557387,1_24557388,1_24557389,1_24557390,1_24557398,1_24557414,1_24557415	+	AT1G65960.2,AT1G65960.1	83.2768576,0.037614
AT1G66580	RPL10C	6	1_24840511,1_24840512,1_24840523,1_24840538,1_24840541,1_24840546	+	AT1G66580.1	334.3787924
AT1G67350	AT1G67350	16	1_25236643,1_25236644,1_25236645,1_25236646,1_25236652,1_25236653,1_25236654,1_25236655,1_25236657,1_25236696,1_25236697,1_25236726,1_25236738,1_25236739,1_25236745,1_25236749	+	AT1G67350.1,AT1G67350.2	215.2114123,27.6633207
AT1G67430	RPL17B	28	1_25263685,1_25263686,1_25263687,1_25263688,1_25263689,1_25263690,1_25263693,1_25263698,1_25263699,1_25263701,1_25263702,1_25263703,1_25263704,1_25263705,1_25263706,1_25263707,1_25263711,1_25263724,1_25263725,1_25263726,1_25263727,1_25263732,1_25263735,1_25263736,1_25263737,1_25263738,1_25263742,1_25263752	+	AT1G67430.1,AT1G67430.2	1040.3021773,0.1471768
AT1G67700	HHL1	5	1_25375922,1_25375967,1_25375974,1_25375982,1_25375990	+	AT1G67700.2,AT1G67700.1,AT1G67700.5,AT1G67700.4,AT1G67700.3	102.248076,96.8659101,0.7922736,0.6286494,0.6189854
AT1G67730	KCR1	5	1_25393458,1_25393480,1_25393485,1_25393486,1_25393508	+	AT1G67730.1	67.8636307
AT1G68010	HPR	20	1_25495718,1_25495792,1_25495793,1_25495794,1_25495795,1_25495796,1_25495797,1_25495798,1_25495799,1_25495800,1_25495837,1_25495844,1_25495845,1_25495846,1_25495852,1_25495854,1_25495860,1_25495861,1_25495862,1_25495863	+	AT1G68010.1,AT1G68010.2	203.5896373,0.0164013
AT1G68680	AT1G68680	3	1_25786733,1_25786734,1_25786753	+	AT1G68680.1	24.3525779
AT1G69510	AT1G69510	15	1_26126411,1_26126412,1_26126413,1_26126458,1_26127839,1_26127840,1_26127841,1_26127867,1_26127868,1_26127869,1_26127870,1_26127895,1_26127896,1_26127897,1_26127898	+	AT1G69510.1,AT1G69510.3,AT1G69510.2	102.4075204,97.1690589,0.1217645
AT1G69620	RPL34B	17	1_26189904,1_26191100,1_26191104,1_26191105,1_26191106,1_26191107,1_26191112,1_26191119,1_26191124,1_26191125,1_26191126,1_26191128,1_26191134,1_26191148,1_26191178,1_26191190,1_26191269	+	AT1G69620.1	843.4058327
AT1G69740	HEMB1	7	1_26234839,1_26234845,1_26234846,1_26234848,1_26234849,1_26234850,1_26234851	+	AT1G69740.1,AT1G69740.3,AT1G69740.2	108.7348517,8.5862552,5.0864089
AT1G70580	GGAT2	3	1_26615895,1_26615932,1_26615933	+	AT1G70580.1,AT1G70580.3,AT1G70580.4,AT1G70580.2	13.8595228,11.3666244,1.6567904,0.8946966
AT1G70660	UEV1B	8	1_26642081,1_26642082,1_26642083,1_26642086,1_26642090,1_26642091,1_26642092,1_26642104	+	AT1G70660.1,AT1G70660.2	66.8923973,4.6335464
AT1G70760	ndhL	7	1_26688262,1_26688263,1_26688293,1_26688296,1_26688316,1_26688329,1_26688330	+	AT1G70760.1	76.0436271
AT1G71220	UGGT	2	1_26851814,1_26851829	+	AT1G71220.1,AT1G71220.2,AT1G71220.3	17.5328779,8.7739159,0.4057108
AT1G71500	AT1G71500	6	1_26937376,1_26937412,1_26937449,1_26937450,1_26937451,1_26937457	+	AT1G71500.1	183.3672891
AT1G72150	PATL1	2	1_27150820,1_27150821	+	AT1G72150.1	133.3608942
AT1G72170	AT1G72170	1	1_27157623	+	AT1G72170.1	73.5715297
AT1G72710	CKL2	11	1_27376201,1_27376202,1_27376203,1_27376247,1_27376277,1_27376280,1_27376281,1_27376282,1_27376464,1_27376467,1_27376496	+	AT1G72710.1	71.6025724
AT1G73060	LPA3	4	1_27481368,1_27481404,1_27481405,1_27481406	+	AT1G73060.1	45.0882895
AT1G73430	AT1G73430	3	1_27611003,1_27611004,1_27611005	+	AT1G73430.1,AT1G73430.2	15.4293,1.0598493
AT1G73440	AT1G73440	5	1_27613351,1_27613352,1_27613353,1_27613354,1_27613355	+	AT1G73440.1	9.2729437
AT1G73990	SPPA	4	1_27828796,1_27828827,1_27828844,1_27828864	+	AT1G73990.1,AT1G73990.2	26.4562097,1.650486
AT1G74040	IPMS2	1	1_27845695	+	AT1G74040.1,AT1G74040.2	12.8257366,0.4400682
AT1G74230	RBG5	2	1_27916916,1_27916917	+	AT1G74230.1	125.7800779
AT1G74470	CHLP	8	1_27992903,1_27992904,1_27992905,1_27992906,1_27992913,1_27992924,1_27992927,1_27992941	+	AT1G74470.1	465.3298591
AT1G74790	HIPL1	2	1_28101714,1_28101715	+	AT1G74790.1	29.6882769
AT1G75350	RPL31	15	1_28272708,1_28272730,1_28272731,1_28272732,1_28272734,1_28272735,1_28272740,1_28272746,1_28272765,1_28272771,1_28272779,1_28272780,1_28272781,1_28272782,1_28272785	+	AT1G75350.1	342.4810331
AT1G75630	VHA-C4	14	1_28402070,1_28402071,1_28402131,1_28402135,1_28402136,1_28402138,1_28402139,1_28402140,1_28402148,1_28402167,1_28402168,1_28402169,1_28402170,1_28402171	+	AT1G75630.1,AT1G75630.2	151.4071212,0.0110706
AT1G75660	XRN3	2	1_28415040,1_28415062	+	AT1G75660.1	33.8599701
AT1G75950	SKP1A	14	1_28517514,1_28517547,1_28517548,1_28517549,1_28517553,1_28517559,1_28517560,1_28517590,1_28517598,1_28517599,1_28517616,1_28517646,1_28517647,1_28517648	+	AT1G75950.1	341.0296435
AT1G76030	VHA-B1	9	1_28536924,1_28536942,1_28536995,1_28537057,1_28537058,1_28537059,1_28537066,1_28537071,1_28537138	+	AT1G76030.1	116.4560331
AT1G76200	AT1G76200	19	1_28594549,1_28594552,1_28594553,1_28594554,1_28594555,1_28594556,1_28594562,1_28594563,1_28594569,1_28594605,1_28594606,1_28594607,1_28594608,1_28594621,1_28594642,1_28594644,1_28594648,1_28594687,1_28594688	+	AT1G76200.1	566.488241
AT1G76490	HMG1	5	1_28698419,1_28698420,1_28698423,1_28698518,1_28698563	+	AT1G76490.1	205.9716753
AT1G77490	APXT	1	1_29120073	+	AT1G77490.1	7.4513034
AT1G77710	AT1G77710	15	1_29207859,1_29207863,1_29207904,1_29207911,1_29207912,1_29207947,1_29207957,1_29207958,1_29207959,1_29207975,1_29207978,1_29207984,1_29207985,1_29207986,1_29207989	+	AT1G77710.1	168.2601925
AT1G77930	AT1G77930	3	1_29302514,1_29302515,1_29302585	+	AT1G77930.1,AT1G77930.3,AT1G77930.2	17.3694411,2.3675701,0.0601932
AT1G78040	AT1G78040	23	1_29346787,1_29346851,1_29346923,1_29346924,1_29346927,1_29346928,1_29346929,1_29346930,1_29346931,1_29346932,1_29346933,1_29346937,1_29346938,1_29346939,1_29346940,1_29346941,1_29346942,1_29346951,1_29346960,1_29346961,1_29346995,1_29346996,1_29346997	+	AT1G78040.2,AT1G78040.3,AT1G78040.1	469.0525205,353.2313956,0.3594327
AT1G78630	RPL13	4	1_29577472,1_29577507,1_29577517,1_29577518	+	AT1G78630.1	366.8207217
AT1G78660	GGH1	1	1_29588202	+	AT1G78660.3,AT1G78660.2,AT1G78660.1	54.2170651,23.8336729,7.6768545
AT1G78680	GGH2	6	1_29596121,1_29596122,1_29596123,1_29596124,1_29596125,1_29596126	+	AT1G78680.1,AT1G78680.2	46.3386081,1.0203407
AT1G78870	UBC35	1	1_29652360	+	AT1G78870.2,AT1G78870.3,AT1G78870.4,AT1G78870.1	57.8301245,1.5258164,0.3419113,0.0567799
AT1G78900	VHA-A	18	1_29664647,1_29664648,1_29664666,1_29664728,1_29664729,1_29664730,1_29664731,1_29664809,1_29664852,1_29664853,1_29664858,1_29664859,1_29664867,1_29664869,1_29664870,1_29664871,1_29664877,1_29664886	+	AT1G78900.1,AT1G78900.2	242.2406478,89.8580494
AT1G79040	PSBR	32	1_29736640,1_29736838,1_29736839,1_29736846,1_29736847,1_29736848,1_29736849,1_29736850,1_29736851,1_29736853,1_29736854,1_29736855,1_29736856,1_29736857,1_29736858,1_29736860,1_29736861,1_29736862,1_29736863,1_29736866,1_29736870,1_29736871,1_29736872,1_29736873,1_29736874,1_29736875,1_29736877,1_29736878,1_29736879,1_29736880,1_29736881,1_29736882	+	AT1G79040.1	4046.9131711
AT1G79075	AT1G79075	23	1_29746641,1_29746734,1_29746735,1_29746765,1_29746771,1_29746772,1_29746773,1_29746774,1_29746775,1_29746776,1_29746789,1_29746790,1_29746791,1_29746795,1_29746796,1_29746797,1_29746807,1_29746808,1_29746811,1_29746812,1_29746813,1_29746814,1_29746815	+	AT1G79075.1,AT1G79075.2	NA
AT1G79230	STR1	5	1_29803799,1_29803823,1_29803829,1_29803830,1_29803887	+	AT1G79230.1,AT1G79230.3,AT1G79230.2	93.047118,0.5304815,0.1730691
AT1G79380	AT1G79380	1	1_29863222	+	AT1G79380.1	25.8623675
AT1G79990	AT1G79990	4	1_30092070,1_30092094,1_30092095,1_30092165	+	AT1G79990.1,AT1G79990.2	40.7164693,0.0249999
AT1G80070	SUS2	6	1_30127612,1_30127643,1_30127655,1_30127656,1_30127657,1_30127658	+	AT1G80070.1	41.5830394
AT1G80380	GLYK	11	1_30219865,1_30219869,1_30219870,1_30219871,1_30219872,1_30219873,1_30219874,1_30219875,1_30219876,1_30219877,1_30219878	+	AT1G80380.2,AT1G80380.3,AT1G80380.6,AT1G80380.5,AT1G80380.8,AT1G80380.7,AT1G80380.1	90.0237562,22.0023775,2.6496631,1.5667971,0.9076417,0.1485502,0.0288711
AT1G80600	WIN1	3	1_30298607,1_30298592,1_30298591	-	AT1G80600.1	82.3625604
AT1G80360	AT1G80360	2	1_30208546,1_30208541	-	AT1G80360.1,AT1G80360.3,AT1G80360.4,AT1G80360.2	41.8961285,11.1433106,8.8763774,6.5654016
AT1G80230	COX5B-2	9	1_30169758,1_30169697,1_30169696,1_30169690,1_30169689,1_30169638,1_30169595,1_30169594,1_30169593	-	AT1G80230.1	139.3533089
AT1G79850	RPS17	12	1_30041437,1_30041436,1_30041432,1_30041429,1_30041411,1_30041408,1_30041383,1_30041382,1_30041381,1_30041370,1_30041369,1_30041364	-	AT1G79850.1	737.6682379
AT1G79750	NADP-ME4	8	1_30007520,1_30007499,1_30007498,1_30007494,1_30007493,1_30007492,1_30007491,1_30007490	-	AT1G79750.1	132.48035
AT1G79600	AT1G79600	6	1_29950077,1_29950036,1_29950035,1_29950034,1_29950011,1_29950010	-	AT1G79600.1	46.6932882
AT1G79550	PGK	16	1_29924302,1_29924301,1_29924299,1_29924253,1_29924239,1_29924193,1_29924192,1_29924191,1_29924190,1_29924189,1_29924188,1_29924187,1_29924186,1_29924185,1_29924184,1_29924183	-	AT1G79550.2,AT1G79550.1	465.2049179,25.5105672
AT1G79530	GAPCP1	10	1_29916118,1_29916050,1_29916049,1_29916044,1_29916043,1_29916042,1_29916041,1_29916005,1_29916004,1_29915971	-	AT1G79530.1	163.5175363
AT1G79390	AT1G79390	1	1_29863281	-	AT1G79390.1	84.570393
AT1G79010	AT1G79010	7	1_29725063,1_29725021,1_29725016,1_29725015,1_29725014,1_29724994,1_29724993	-	AT1G79010.1	181.4626471
AT1G78380	GSTU19	2	1_29486505,1_29486482	-	AT1G78380.1	1658.758867
AT1G78240	QUA2	3	1_29432962,1_29432948,1_29432921	-	AT1G78240.1,AT1G78240.2	14.441746,12.8746269
AT1G78140	AT1G78140	1	1_29401875	-	AT1G78140.1	24.5811107
AT1G77940	RPL30B	21	1_29304098,1_29304097,1_29304096,1_29304093,1_29304081,1_29304080,1_29304079,1_29304066,1_29304050,1_29304049,1_29304048,1_29304014,1_29304011,1_29304009,1_29304008,1_29304007,1_29304006,1_29304005,1_29304004,1_29304003,1_29304002	-	AT1G77940.1	882.3000863
AT1G77090	PPD4	1	1_28960516	-	AT1G77090.1	30.695809
AT1G76860	LSM3B	3	1_28854498,1_28854481,1_28854451	-	AT1G76860.1	179.0632099
AT1G76670	UDP-GALT2	1	1_28772713	-	AT1G76670.1,AT1G76670.2	68.077419,0
AT1G76160	sks5	2	1_28578016,1_28578015	-	AT1G76160.1	75.0086712
AT1G76080	CDSP32	3	1_28548042,1_28548041,1_28548016	-	AT1G76080.1	203.268547
AT1G76010	AT1G76010	12	1_28528417,1_28528416,1_28528408,1_28528406,1_28528405,1_28528404,1_28528403,1_28528337,1_28528126,1_28528111,1_28528110,1_28528109	-	AT1G76010.1,AT1G76010.2	225.1867206,0
AT1G75690	LQY1	2	1_28422245,1_28422135	-	AT1G75690.1	86.047176
AT1G75380	BBD1	3	1_28281527,1_28281509,1_28281508	-	AT1G75380.3,AT1G75380.2,AT1G75380.1	23.1878117,10.7043314,2.1260689
AT1G75220	AT1G75220	10	1_28229212,1_28229211,1_28229208,1_28229207,1_28229206,1_28229204,1_28229203,1_28229202,1_28229201,1_28229200	-	AT1G75220.1	46.3680093
AT1G74970	RPS9	20	1_28157692,1_28157685,1_28157657,1_28157656,1_28157655,1_28157654,1_28157653,1_28157652,1_28157645,1_28157621,1_28157620,1_28157619,1_28157618,1_28157617,1_28157616,1_28157615,1_28157614,1_28157602,1_28157600,1_28157591	-	AT1G74970.1	236.7000142
AT1G74960	KAS2	3	1_28152067,1_28152048,1_28152046	-	AT1G74960.2,AT1G74960.3	95.9631127,4.5432239
AT1G74920	ALDH10A8	1	1_28139091	-	AT1G74920.1,AT1G74920.2	91.566722,0.3670243
AT1G74910	AT1G74910	12	1_28135643,1_28135642,1_28135626,1_28135625,1_28135624,1_28135605,1_28135601,1_28135600,1_28135599,1_28135598,1_28135563,1_28135562	-	AT1G74910.1,AT1G74910.2,AT1G74910.3	40.2461132,9.5450066,0.1278004
AT1G74880	ndhO	2	1_28129963,1_28129962	-	AT1G74880.1	65.9789551
AT1G74560	NRP1	6	1_28017693,1_28017684,1_28017683,1_28017670,1_28017667,1_28017639	-	AT1G74560.1,AT1G74560.3	100.9420074,0.0935939
AT1G74340	AT1G74340	8	1_27948240,1_27948179,1_27948178,1_27948169,1_27948158,1_27948154,1_27948145,1_27948136	-	AT1G74340.1,AT1G74340.2	46.3610056,0.6443884
AT1G74270	RPL35AC	9	1_27928343,1_27928342,1_27928325,1_27928324,1_27928320,1_27928311,1_27928310,1_27928296,1_27928295	-	AT1G74270.1	401.1931306
AT1G74060	RPL6B	9	1_27849952,1_27849951,1_27849949,1_27849933,1_27849932,1_27849930,1_27849929,1_27849915,1_27849907	-	AT1G74060.1	261.7562462
AT1G74050	RPL6C	17	1_27847206,1_27847205,1_27847204,1_27847173,1_27847161,1_27847159,1_27847158,1_27847157,1_27847156,1_27847155,1_27847154,1_27847147,1_27847146,1_27847145,1_27847138,1_27847133,1_27847121	-	AT1G74050.1	329.7332076
AT1G73650	AT1G73650	1	1_27688318	-	AT1G73650.5,AT1G73650.2,AT1G73650.4,AT1G73650.3,AT1G73650.1	27.9742088,19.1701367,3.5637022,3.4112799,0
AT1G73230	AT1G73230	6	1_27540377,1_27540376,1_27540375,1_27540369,1_27540313,1_27540288	-	AT1G73230.1	398.2483238
AT1G72550	AT1G72550	1	1_27319810	-	AT1G72550.1,AT1G72550.2	39.4021708,0.046724
AT1G72370	RPSAA	10	1_27243055,1_27243043,1_27243036,1_27243035,1_27243023,1_27243022,1_27243011,1_27243010,1_27242988,1_27242970	-	AT1G72370.1,AT1G72370.2	875.377084,1.2154801
AT1G72020	AT1G72020	5	1_27109441,1_27109440,1_27109378,1_27109376,1_27109332	-	AT1G72020.1	407.7421142
AT1G71950	AT1G71950	9	1_27080375,1_27080374,1_27080373,1_27080372,1_27080371,1_27080370,1_27080362,1_27080344,1_27080343	-	AT1G71950.1	72.4146156
AT1G70770	AT1G70770	3	1_26688390,1_26688386,1_26688385	-	AT1G70770.1	109.1166634
AT1G70730	PGM2	7	1_26669031,1_26668949,1_26668941,1_26668938,1_26668925,1_26668893,1_26668885	-	AT1G70730.1,AT1G70730.3,AT1G70730.2	48.8764958,2.641048,0.0460392
AT1G70600	RPL27AC	25	1_26621107,1_26621101,1_26621100,1_26621099,1_26621098,1_26621097,1_26621096,1_26621093,1_26621059,1_26621057,1_26621056,1_26621055,1_26621054,1_26621031,1_26621030,1_26621029,1_26621028,1_26621026,1_26621025,1_26621024,1_26621023,1_26621022,1_26621019,1_26621018,1_26621016	-	AT1G70600.1	1335.1150638
AT1G70490	ARF2-A	17	1_26564056,1_26564055,1_26564048,1_26564036,1_26564032,1_26564028,1_26564022,1_26564019,1_26564001,1_26564000,1_26563999,1_26563998,1_26563984,1_26563982,1_26563981,1_26563971,1_26563965	-	AT1G70490.1,AT1G70490.2,AT1G70490.3,AT1G70490.7,AT1G70490.5,AT1G70490.4,AT1G70490.6	196.1146802,53.2834452,3.4928411,0.6828622,0.3085603,0.2125792,0
AT1G70410	BCA4	10	1_26534114,1_26534113,1_26534111,1_26534086,1_26534057,1_26534056,1_26534055,1_26534054,1_26534036,1_26533979	-	AT1G70410.2,AT1G70410.3,AT1G70410.1	55.8247038,33.6966252,0.4467375
AT1G70310	SPDSYN2	3	1_26485446,1_26485445,1_26485440	-	AT1G70310.1	90.9878231
AT1G70050	AT1G70050	4	1_26382190,1_26382189,1_26382168,1_26382167	-	AT1G70050.1	NA
AT1G69640	SBH1	2	1_26193693,1_26193689	-	AT1G69640.1	35.4543605
AT1G68830	STN7	3	1_25872621,1_25872573,1_25872572	-	AT1G68830.1	30.3436987
AT1G68660	AT1G68660	16	1_25778035,1_25778034,1_25778033,1_25778032,1_25777988,1_25777987,1_25777965,1_25777964,1_25777963,1_25777960,1_25777959,1_25777958,1_25777957,1_25777945,1_25777944,1_25777943	-	AT1G68660.1,AT1G68660.2	60.5613468,2.3526731
AT1G68590	AT1G68590	1	1_25757527	-	AT1G68590.1,AT1G68590.2	200.3924518,0.6280632
AT1G68300	AT1G68300	3	1_25598425,1_25598382,1_25598381	-	AT1G68300.1	154.2082153
AT1G67785	AT1G67785	14	1_25416062,1_25416040,1_25416030,1_25416029,1_25416026,1_25416025,1_25416023,1_25415989,1_25415952,1_25415947,1_25415946,1_25415945,1_25415942,1_25415917	-	AT1G67785.1	183.8976271
AT1G67740	PSBY	19	1_25394369,1_25394361,1_25394360,1_25394359,1_25394358,1_25394357,1_25394356,1_25394349,1_25394348,1_25394347,1_25394346,1_25394342,1_25394341,1_25394339,1_25394338,1_25394337,1_25394336,1_25394335,1_25394334	-	AT1G67740.1	575.3879543
AT1G67250	AT1G67250	6	1_25163815,1_25163776,1_25163754,1_25163753,1_25163704,1_25163703	-	AT1G67250.1	122.4995147
AT1G67090	RBCS-1A	27	1_25048402,1_25048382,1_25048373,1_25048372,1_25048371,1_25048370,1_25048369,1_25048368,1_25048367,1_25048361,1_25048360,1_25048359,1_25048357,1_25048352,1_25048349,1_25048348,1_25048340,1_25048332,1_25048331,1_25048330,1_25048329,1_25048328,1_25048327,1_25048326,1_25048316,1_25048315,1_25048313	-	AT1G67090.1,AT1G67090.2	9263.7414377,0.6464333
AT1G66410	CAM4	7	1_24774405,1_24774373,1_24774361,1_24774360,1_24774344,1_24774343,1_24774256	-	AT1G66410.1,AT1G66410.3,AT1G66410.4,AT1G66410.2	247.8793849,0.5638383,0.3769066,0.0372725
AT1G66330	AT1G66330	1	1_24729776	-	AT1G66330.1,AT1G66330.2	19.9876793,12.6505692
AT1G66240	ATX1	17	1_24686385,1_24686377,1_24686376,1_24686360,1_24686347,1_24686346,1_24686343,1_24686342,1_24686341,1_24686340,1_24686339,1_24686338,1_24686337,1_24686336,1_24686335,1_24686334,1_24686329	-	AT1G66240.1,AT1G66240.2,AT1G66240.3	383.8423544,84.1098878,4.5152002
AT1G66200	GLN1-2	3	1_24655354,1_24655318,1_24655310	-	AT1G66200.1,AT1G66200.2	984.3774863,0.1422416
AT1G66070	AT1G66070	1	1_24595968	-	AT1G66070.1,AT1G66070.2	30.5358919,0.0559538
AT1G65980	PRXIIB	14	1_24559485,1_24559480,1_24559478,1_24559477,1_24559475,1_24559470,1_24559469,1_24559468,1_24559466,1_24559465,1_24559463,1_24559462,1_24559461,1_24559435	-	AT1G65980.1,AT1G65980.2	450.6474806,0.2931368
AT1G65720	AT1G65720	8	1_24440390,1_24440386,1_24440385,1_24440375,1_24440372,1_24440361,1_24440360,1_24440337	-	AT1G65720.1	79.2370317
AT1G65290	MTACP2	10	1_24249030,1_24248989,1_24248988,1_24248987,1_24248986,1_24248951,1_24248939,1_24248932,1_24248908,1_24248907	-	AT1G65290.1	431.628116
AT1G64990	GTG1	1	1_24140063	-	AT1G64990.1,AT1G64990.2	12.303545,7.9964126
AT1G64850	AT1G64850	4	1_24096516,1_24096515,1_24096514,1_24096485	-	AT1G64850.1	65.007644
AT1G64790	ILA	3	1_24065141,1_24065140,1_24065139	-	AT1G64790.1,AT1G64790.3,AT1G64790.2	17.2395045,0.0208317,0.0151841
AT1G64750	DSS1(I)	5	1_24052732,1_24052731,1_24052659,1_24052635,1_24052630	-	AT1G64750.1,AT1G64750.2,AT1G64750.3	206.5581309,27.6453611,0.4930163
AT1G64720	CP5	2	1_24046858,1_24046695	-	AT1G64720.1	316.6139482
AT1G64650	AT1G64650	2	1_24023677,1_24023668	-	AT1G64650.1,AT1G64650.2	77.1937571,0.346618
AT1G64510	RPS6	4	1_23954955,1_23954954,1_23954953,1_23954873	-	AT1G64510.1,AT1G64510.2	362.2927264,1.9385989
AT1G64040	TOPP3	2	1_23758407,1_23758406	-	AT1G64040.1	61.815294
AT1G63970	ISPF	2	1_23738846,1_23738821	-	AT1G63970.1	62.5055341
AT1G63770	AT1G63770	6	1_23657733,1_23657717,1_23657698,1_23657686,1_23657685,1_23657684	-	AT1G63770.4,AT1G63770.3,AT1G63770.2,AT1G63770.1	26.5224436,2.0653238,0.2069927,0.0231498
AT1G63660	AT1G63660	2	1_23604067,1_23604066	-	AT1G63660.1,AT1G63660.2	40.7574177,0
AT1G63290	AT1G63290	1	1_23472043	-	AT1G63290.1	54.4590618
AT1G62750	CPEFG	12	1_23233608,1_23233589,1_23233588,1_23233576,1_23233570,1_23233558,1_23233543,1_23233529,1_23233528,1_23233527,1_23233525,1_23233519	-	AT1G62750.1	158.2824463
AT1G61780	AT1G61780	7	1_22812793,1_22812792,1_22812744,1_22812723,1_22812722,1_22812721,1_22812720	-	AT1G61780.1	70.6841802
AT1G61570	TIM13	6	1_22718865,1_22718850,1_22718836,1_22718835,1_22718818,1_22718816	-	AT1G61570.1	94.1028303
AT1G60780	AP1M2	6	1_22369142,1_22369095,1_22369092,1_22369083,1_22369040,1_22369039	-	AT1G60780.1	69.2501641
AT1G60710	ATB2	4	1_22354877,1_22354863,1_22354862,1_22354833	-	AT1G60710.1	130.1408575
AT1G59830	PP2A1	1	1_22020577	-	AT1G59830.1,AT1G59830.2	33.0953919,0.3167428
AT1G58080	HISN1A	2	1_21504396,1_21504328	-	AT1G58080.1	86.1874628
AT1G57860	RPL21F	7	1_21429971,1_21429970,1_21429969,1_21429966,1_21429965,1_21429964,1_21429963	-	AT1G57860.1	369.7190986
AT1G56340	CRT1	10	1_21089988,1_21089971,1_21089970,1_21089956,1_21089934,1_21089919,1_21089918,1_21089914,1_21089913,1_21089912	-	AT1G56340.1,AT1G56340.2	209.9168585,13.9338159
AT1G56330	SAR1B	12	1_21086815,1_21086773,1_21086762,1_21086761,1_21086750,1_21086742,1_21086681,1_21086598,1_21086597,1_21086596,1_21086584,1_21086583	-	AT1G56330.1	252.6156203
AT1G56280	ATDI19	16	1_21073147,1_21073137,1_21073129,1_21073128,1_21073127,1_21073126,1_21073125,1_21073093,1_21073092,1_21073090,1_21073082,1_21073081,1_21073080,1_21073015,1_21073014,1_21072992	-	AT1G56280.1,AT1G56280.2	337.2503237,7.8523678
AT1G56110	NOP56	1	1_20984452	-	AT1G56110.1	148.1999783
AT1G56070	LOS1	23	1_20968172,1_20968171,1_20968170,1_20968169,1_20968166,1_20968165,1_20968164,1_20968163,1_20968162,1_20968161,1_20968160,1_20968159,1_20968153,1_20968148,1_20968136,1_20968135,1_20968105,1_20968104,1_20968098,1_20968097,1_20968096,1_20968080,1_20968079	-	AT1G56070.1,AT1G56070.2,AT1G56070.3	618.1043711,0.9537717,0.1697443
AT1G55670	PSAG	8	1_20802820,1_20802768,1_20802765,1_20802762,1_20802761,1_20802760,1_20802759,1_20802758	-	AT1G55670.1	1481.7935632
AT1G55490	CPN60B1	6	1_20715645,1_20715644,1_20715632,1_20715628,1_20715627,1_20715626	-	AT1G55490.2,AT1G55490.3,AT1G55490.4,AT1G55490.1,AT1G55490.5	287.8084803,0.2903276,0.1771198,0.123159,0.1154378
AT1G54630	ACP3	10	1_20401560,1_20401559,1_20401558,1_20401501,1_20401495,1_20401494,1_20401493,1_20401475,1_20401474,1_20401473	-	AT1G54630.1,AT1G54630.2	170.6733234,1.4871114
AT1G54410	AT1G54410	1	1_20309859	-	AT1G54410.1	791.6599234
AT1G54100	ALDH7B4	1	1_20195388	-	AT1G54100.1,AT1G54100.2	72.2673414,30.8989892
AT1G54080	UBP1A	6	1_20183832,1_20183768,1_20183757,1_20183756,1_20183730,1_20183729	-	AT1G54080.1,AT1G54080.2	63.2634876,2.6042034
AT1G53750	RPT1A	7	1_20065938,1_20065832,1_20065812,1_20065811,1_20065810,1_20065808,1_20065805	-	AT1G53750.1	127.2497832
AT1G53560	AT1G53560	3	1_19984889,1_19984830,1_19984800	-	AT1G53560.1	22.5077288
AT1G53310	PPC1	2	1_19884122,1_19884104	-	AT1G53310.2,AT1G53310.1,AT1G53310.3	83.366072,11.8840168,7.1906422
AT1G53240	mMDH1	18	1_19854941,1_19854932,1_19854931,1_19854891,1_19854855,1_19854854,1_19854853,1_19854852,1_19854851,1_19854785,1_19854782,1_19854761,1_19854760,1_19854759,1_19854758,1_19854755,1_19854754,1_19854686	-	AT1G53240.1	420.292659
AT1G53030	COX17-2	3	1_19760166,1_19760165,1_19760159	-	AT1G53030.1	22.5088868
AT1G52590	AT1G52590	2	1_19589092,1_19589059	-	AT1G52590.1	14.9746322
AT1G52510	AT1G52510	1	1_19561622	-	AT1G52510.1	41.2860856
AT1G52300	RPL37B	23	1_19476185,1_19476184,1_19475167,1_19475166,1_19475165,1_19475151,1_19475139,1_19475138,1_19475114,1_19475113,1_19475109,1_19475108,1_19475107,1_19475106,1_19475105,1_19475104,1_19475100,1_19475099,1_19475098,1_19475097,1_19475096,1_19475080,1_19475079	-	AT1G52300.1	1092.503052
AT1G52220	CURT1C	11	1_19453708,1_19453707,1_19453685,1_19453684,1_19453648,1_19453643,1_19453634,1_19453633,1_19453632,1_19453631,1_19453630	-	AT1G52220.1,AT1G52220.3,AT1G52220.4,AT1G52220.2	99.5776663,7.0931352,1.1076723,0.2273201
AT1G51980	AT1G51980	15	1_19323587,1_19323551,1_19323550,1_19323549,1_19323529,1_19323494,1_19323493,1_19323492,1_19323483,1_19323482,1_19323463,1_19323462,1_19323461,1_19323460,1_19323459	-	AT1G51980.1,AT1G51980.2	182.7356483,2.1068511
AT1G51805	AT1G51805	2	1_19221086,1_19221073	-	AT1G51805.2,AT1G51805.1	5.1679077,3.4211499
AT1G51730	AT1G51730	1	1_19186635	-	AT1G51730.1	54.4532248
AT1G51710	UBP6	5	1_19175746,1_19175745,1_19175744,1_19175723,1_19175709	-	AT1G51710.1,AT1G51710.2	52.3730851,1.8318304
AT1G51510	Y14	3	1_19102889,1_19102870,1_19102869	-	AT1G51510.1	154.1235789
AT1G51500	ABCG12	4	1_19097931,1_19097928,1_19097927,1_19097914	-	AT1G51500.1	26.3572521
AT1G51400	AT1G51400	4	1_19052141,1_19052118,1_19052114,1_19052113	-	AT1G51400.1	758.3918791
AT1G50670	AT1G50670	2	1_18774942,1_18774941	-	AT1G50670.1,AT1G50670.3,AT1G50670.2	21.2049888,16.1690222,2.6649774
AT1G50430	DWF5	3	1_18682128,1_18682065,1_18682006	-	AT1G50430.1,AT1G50430.2	80.4836866,0.0284342
AT1G50320	ATHX	9	1_18638528,1_18638497,1_18638496,1_18638495,1_18638494,1_18638483,1_18638482,1_18638481,1_18638480	-	AT1G50320.1	146.09514
AT1G50250	FTSH1	2	1_18614382,1_18614344	-	AT1G50250.1	62.5013822
AT1G50200	ALATS	5	1_18591345,1_18591344,1_18591306,1_18591305,1_18591299	-	AT1G50200.1,AT1G50200.2	81.3567276,1.439518
AT1G50020	AT1G50020	8	1_18520054,1_18520053,1_18520052,1_18520051,1_18520050,1_18520049,1_18520046,1_18520045	-	AT1G50020.1	50.3504378
AT1G49970	CLPR1	3	1_18501869,1_18501835,1_18501834	-	AT1G49970.1	85.6203974
AT1G49670	NQR	5	1_18381455,1_18381439,1_18381438,1_18381437,1_18381436	-	AT1G49670.1,AT1G49670.2	32.5477663,0.0138262
AT1G49600	RBP47A	3	1_18356960,1_18356952,1_18356951	-	AT1G49600.1,AT1G49600.3,AT1G49600.2	93.6357508,0.4909129,0.0852194
AT1G49410	TOM6	13	1_18285712,1_18285711,1_18285710,1_18285709,1_18285708,1_18285689,1_18285668,1_18285626,1_18285616,1_18285567,1_18285566,1_18285565,1_18285552	-	AT1G49410.1	145.8073975
AT1G49140	AT1G49140	12	1_18176908,1_18176903,1_18176902,1_18176837,1_18176836,1_18176835,1_18176834,1_18176833,1_18176820,1_18176818,1_18176817,1_18176814	-	AT1G49140.1,AT1G49140.2	375.2255003,0.3454132
AT1G48850	EMB1144	6	1_18065068,1_18065067,1_18065064,1_18065033,1_18065032,1_18065019	-	AT1G48850.1,AT1G48850.3,AT1G48850.2	103.2599846,0.0161849,0
AT1G48830	RPS7A	12	1_18059798,1_18059761,1_18059760,1_18059759,1_18059754,1_18059753,1_18059752,1_18059751,1_18059748,1_18059743,1_18059742,1_18059741	-	AT1G48830.1,AT1G48830.2	257.8312856,9.1572015
AT1G48790	AMSH1	1	1_18043891	-	AT1G48790.1	22.8746121
AT1G48630	RACK1B	1	1_17981879	-	AT1G48630.1	183.2963413
AT1G48450	AT1G48450	3	1_17908666,1_17908652,1_17908636	-	AT1G48450.1,AT1G48450.3,AT1G48450.2	66.831039,0.0180004,0.0159098
AT1G48410	AGO1	5	1_17886207,1_17886181,1_17886180,1_17886163,1_17886162	-	AT1G48410.1,AT1G48410.2	42.2950371,1.200051
AT1G48160	SRP19	3	1_17786685,1_17786677,1_17786676	-	AT1G48160.2,AT1G48160.1	48.4381268,0.3183809
AT1G48090	AT1G48090	1	1_17732099	-	AT1G48090.4,AT1G48090.5,AT1G48090.3,AT1G48090.2,AT1G48090.1	4.5122164,0
AT1G48030	LPD1	8	1_17717198,1_17717197,1_17717179,1_17717167,1_17717166,1_17717165,1_17717157,1_17717156	-	AT1G48030.5,AT1G48030.2,AT1G48030.4,AT1G48030.1,AT1G48030.3	91.1636906,32.8692629,21.4126749,0.3765226,0.0075273
AT1G47830	AP17	1	1_17613254	-	AT1G47830.1	45.6557084
AT1G47720	OSB1	10	1_17561229,1_17561228,1_17561226,1_17561225,1_17561224,1_17561223,1_17561222,1_17561221,1_17561220,1_17561210	-	AT1G47720.1	6.2520966
AT1G47640	AT1G47640	1	1_17518260	-	AT1G47640.1	71.9379569
AT1G47420	SDH5	3	1_17395712,1_17395711,1_17395627	-	AT1G47420.1	275.9304027
AT1G47260	GAMMACA2	21	1_17321297,1_17321296,1_17321295,1_17321294,1_17321292,1_17321291,1_17321290,1_17321289,1_17321288,1_17321287,1_17321286,1_17321285,1_17321268,1_17321246,1_17321226,1_17321225,1_17321223,1_17321222,1_17321220,1_17321211,1_17321203	-	AT1G47260.1	88.2669649
AT1G47128	RD21A	15	1_17283066,1_17283064,1_17283054,1_17283053,1_17283052,1_17282983,1_17282973,1_17282969,1_17282967,1_17282960,1_17282959,1_17282958,1_17282957,1_17282948,1_17282947	-	AT1G47128.1	409.4420048
AT1G44770	AT1G44770	2	1_16907685,1_16907684	-	AT1G44770.1,AT1G44770.2	31.0849787,10.7019569
AT1G44446	CAO	3	1_16848517,1_16848511,1_16848423	-	AT1G44446.1,AT1G44446.3,AT1G44446.2,AT1G44446.4	64.4575923,4.0489781,2.8989063,0.7951955
AT1G44000	SGRL	7	1_16708220,1_16708165,1_16708150,1_16708149,1_16708121,1_16708114,1_16708088	-	AT1G44000.1	77.7094443
AT1G43560	Aty2	1	1_16398332	-	AT1G43560.1	69.8422628
AT1G43130	LCV2	5	1_16228594,1_16228580,1_16228579,1_16228561,1_16228560	-	AT1G43130.1,AT1G43130.2,AT1G43130.3	24.2846319,0.101935,0.038206
AT1G41880	RPL35AB	23	1_15651202,1_15651201,1_15651200,1_15651199,1_15651198,1_15651197,1_15651196,1_15651194,1_15651193,1_15651192,1_15651184,1_15651177,1_15651176,1_15651175,1_15651174,1_15651173,1_15651172,1_15651171,1_15651168,1_15651157,1_15651156,1_15651155,1_15651154	-	AT1G41880.1,AT1G41880.2	460.3941523,0.4627946
AT1G35580	CINV1	11	1_13122377,1_13122346,1_13122345,1_13122344,1_13122343,1_13122342,1_13122341,1_13122340,1_13122339,1_13122335,1_13122306	-	AT1G35580.2,AT1G35580.1	127.0498501,41.9870712
AT1G34430	EMB3003	2	1_12587878,1_12587877	-	AT1G34430.1	108.1264239
AT1G34030	RPS18A	14	1_12370228,1_12370207,1_12370206,1_12370197,1_12370196,1_12370194,1_12370188,1_12370183,1_12370159,1_12370154,1_12370153,1_12370152,1_12370151,1_12370145	-	AT1G34030.1	413.7348396
AT1G34000	OHP2	15	1_12358106,1_12358098,1_12358081,1_12358074,1_12358073,1_12358072,1_12358057,1_12358018,1_12358017,1_12358014,1_12358013,1_12358012,1_12358011,1_12357986,1_12357985	-	AT1G34000.1	127.2413933
AT1G32790	CID11	6	1_11875039,1_11875038,1_11875017,1_11875010,1_11874994,1_11874993	-	AT1G32790.1,AT1G32790.2	87.4412717,0.0858996
AT1G32550	FdC1	1	1_11771882	-	AT1G32550.1	34.7754854
AT1G32470	GDH3	19	1_11739430,1_11739385,1_11739384,1_11739383,1_11739382,1_11739381,1_11739380,1_11739372,1_11739371,1_11739365,1_11739364,1_11739363,1_11739362,1_11739361,1_11739360,1_11739359,1_11739358,1_11739350,1_11739341	-	AT1G32470.1	432.857184
AT1G32400	TOM2A	3	1_11689199,1_11689198,1_11689197	-	AT1G32400.1,AT1G32400.2,AT1G32400.3	82.733486,0.3247877,0.2335603
AT1G32210	DAD1	5	1_11606006,1_11605963,1_11605925,1_11605924,1_11605905	-	AT1G32210.1,AT1G32210.2	100.1002213,0.2234679
AT1G32200	ATS1	3	1_11602035,1_11602034,1_11602033	-	AT1G32200.1,AT1G32200.2	28.3954757,4.3909582
AT1G32130	IWS1	2	1_11558942,1_11558941	-	AT1G32130.1,AT1G32130.2	43.5422059,0.2294828
AT1G32080	PLGG1	1	1_11537434	-	AT1G32080.1	61.6236959
AT1G31812	ACBP6	31	1_11412146,1_11412139,1_11412138,1_11412137,1_11412136,1_11412135,1_11412134,1_11412133,1_11412120,1_11411182,1_11411099,1_11411082,1_11411047,1_11411042,1_11411041,1_11411040,1_11411031,1_11411030,1_11411028,1_11411027,1_11411026,1_11411023,1_11411022,1_11411021,1_11411006,1_11411005,1_11411004,1_11411003,1_11410992,1_11410991,1_11410988	-	AT1G31812.1	550.0091589
AT1G31340	RUB1	7	1_11218045,1_11218044,1_11218012,1_11218005,1_11218001,1_11217961,1_11217955	-	AT1G31340.1	56.9379758
AT1G31330	PSAF	27	1_11214967,1_11214959,1_11214958,1_11214953,1_11214952,1_11214951,1_11214950,1_11214949,1_11214948,1_11214947,1_11214946,1_11214945,1_11214944,1_11214941,1_11214938,1_11214935,1_11214934,1_11214933,1_11214932,1_11214931,1_11214930,1_11214929,1_11214928,1_11214917,1_11214911,1_11214910,1_11214909	-	AT1G31330.1	1368.8170926
AT1G30880	AT1G30880	19	1_10993293,1_10993267,1_10993266,1_10993265,1_10993264,1_10993262,1_10993261,1_10993260,1_10993259,1_10993254,1_10993253,1_10993252,1_10993251,1_10993249,1_10993248,1_10993247,1_10993246,1_10993245,1_10993244	-	AT1G30880.1,AT1G30880.2	145.7440514,0.0947414
AT1G30630	AT1G30630	4	1_10858506,1_10858399,1_10858392,1_10858391	-	AT1G30630.1	128.2810954
AT1G30580	AT1G30580	3	1_10831817,1_10831788,1_10831758	-	AT1G30580.1	200.8437773
AT1G30120	PDH-E1 BETA	2	1_10584211,1_10584210	-	AT1G30120.1	140.9664869
AT1G29920	LHCB1.2	2	1_10475054,1_10474942	-	AT1G29920.1	5728.5317881
AT1G29910	LHCB1.2	3	1_10472427,1_10472395,1_10472309	-	AT1G29910.1	6245.4969644
AT1G29880	GLYRS-1	9	1_10459579,1_10459566,1_10459565,1_10459564,1_10459563,1_10459561,1_10459548,1_10459547,1_10459546	-	AT1G29880.1	59.9053614
AT1G29470	AT1G29470	3	1_10310347,1_10310342,1_10310276	-	AT1G29470.2,AT1G29470.1	70.0029991,36.9650669
AT1G29250	AT1G29250	2	1_10223425,1_10223328	-	AT1G29250.1	124.0252194
AT1G28150	AT1G28150	8	1_9835077,1_9835020,1_9835019,1_9835015,1_9835014,1_9835013,1_9835012,1_9834978	-	AT1G28150.1,AT1G28150.2	50.927903,0.4875286
AT1G28120	AT1G28120	1	1_9813051	-	AT1G28120.1	32.1885514
AT1G27530	AT1G27530	7	1_9562746,1_9562690,1_9562673,1_9562671,1_9562663,1_9562662,1_9562661	-	AT1G27530.1	149.080723
AT1G27435	AT1G27435	2	1_9527845,1_9527782	-	AT1G27435.1	144.4859871
AT1G27350	AT1G27350	5	1_9498211,1_9498198,1_9498179,1_9498178,1_9498177	-	AT1G27350.1	73.8694129
AT1G27310	NTF2A	8	1_9484484,1_9484470,1_9484469,1_9484468,1_9484462,1_9484417,1_9484374,1_9484373	-	AT1G27310.1	190.4942839
AT1G27090	AT1G27090	4	1_9404005,1_9404001,1_9404000,1_9403951	-	AT1G27090.1	112.7316145
AT1G26880	RPL34A	13	1_9315562,1_9315559,1_9315528,1_9315527,1_9315524,1_9315523,1_9315520,1_9315517,1_9315513,1_9315512,1_9315510,1_9315506,1_9315505	-	AT1G26880.1,AT1G26880.2	317.8548154,0.4455376
AT1G26850	AT1G26850	4	1_9301013,1_9301010,1_9301009,1_9300980	-	AT1G26850.1,AT1G26850.2,AT1G26850.3	92.8160595,41.3552415,0
AT1G26110	DCP5	2	1_9024390,1_9024358	-	AT1G26110.1,AT1G26110.2	99.8426686,2.4539851
AT1G25260	AT1G25260	2	1_8854100,1_8854099	-	AT1G25260.1	64.5537164
AT1G24510	CCT5	6	1_8685519,1_8685439,1_8685401,1_8685396,1_8685379,1_8685356	-	AT1G24510.1,AT1G24510.2,AT1G24510.3	190.2589247,0.2099405,0.0687654
AT1G24350	AT1G24350	1	1_8638979	-	AT1G24350.1,AT1G24350.2	9.0958418,0.2577598
AT1G24180	IAR4	6	1_8560667,1_8560623,1_8560621,1_8560610,1_8560609,1_8560608	-	AT1G24180.1	176.1729207
AT1G23960	AT1G23960	4	1_8478517,1_8478516,1_8478515,1_8478492	-	AT1G23960.1,AT1G23960.2	39.0731449,1.5837091
AT1G23310	GGAT1	18	1_8268714,1_8268711,1_8268707,1_8268697,1_8268669,1_8268665,1_8268664,1_8268663,1_8268656,1_8268650,1_8268647,1_8268646,1_8268645,1_8268644,1_8268643,1_8268636,1_8268596,1_8268552	-	AT1G23310.1,AT1G23310.2	361.5062945,0.1031297
AT1G23260	UEV1A	1	1_8257110	-	AT1G23260.1,AT1G23260.2	45.4812012,0.1127258
AT1G22850	AT1G22850	1	1_8080600	-	AT1G22850.1	58.2595134
AT1G22520	AT1G22520	2	1_7953181,1_7953180	-	AT1G22520.1	67.3471164
AT1G22300	GRF10	14	1_7879043,1_7879027,1_7879026,1_7879025,1_7879024,1_7879016,1_7878982,1_7878981,1_7878967,1_7878940,1_7878923,1_7878922,1_7878921,1_7878883	-	AT1G22300.1,AT1G22300.2,AT1G22300.3	202.2892034,80.5160866,1.8713361
AT1G21770	AT1G21770	2	1_7651815,1_7651720	-	AT1G21770.1	495.9193749
AT1G21500	AT1G21500	7	1_7530031,1_7529996,1_7529995,1_7529988,1_7529954,1_7529927,1_7529900	-	AT1G21500.1	213.0157551
AT1G20960	emb1507	3	1_7301869,1_7301864,1_7301863	-	AT1G20960.1,AT1G20960.2	28.7566639,4.3383788
AT1G20950	PFP-ALPHA1	3	1_7297352,1_7297351,1_7297348	-	AT1G20950.1	67.1277103
AT1G20340	DRT112	16	1_7042731,1_7042730,1_7042678,1_7042668,1_7042666,1_7042665,1_7042664,1_7042663,1_7042649,1_7042648,1_7042643,1_7042642,1_7042641,1_7042640,1_7042639,1_7042638	-	AT1G20340.1	1618.1469042
AT1G20225	AT1G20225	1	1_7007853	-	AT1G20225.1	48.4238572
AT1G20220	AT1G20220	2	1_7004960,1_7004959	-	AT1G20220.1	106.6409362
AT1G20200	RPN3A	1	1_7001307	-	AT1G20200.1	61.8179957
AT1G20010	TUBB5	1	1_6937961	-	AT1G20010.1	104.0158233
AT1G19920	APS2	1	1_6914739	-	AT1G19920.1	66.1736796
AT1G19660	BBD2	4	1_6800167,1_6800089,1_6800068,1_6800034	-	AT1G19660.1,AT1G19660.2,AT1G19660.3	48.5187539,7.2579962,0.2292763
AT1G19000	AT1G19000	2	1_6560868,1_6560853	-	AT1G19000.1,AT1G19000.2	88.2146462,40.3848372
AT1G18720	AT1G18720	4	1_6457955,1_6457954,1_6457921,1_6457920	-	AT1G18720.1,AT1G18720.2	79.1918782,0.5223124
AT1G18540	RPL6A	20	1_6377486,1_6377449,1_6377400,1_6377399,1_6377398,1_6377397,1_6377394,1_6377393,1_6377392,1_6377391,1_6377390,1_6377389,1_6377388,1_6377387,1_6377386,1_6377380,1_6377374,1_6377372,1_6377361,1_6377360	-	AT1G18540.1	413.5683991
AT1G18260	HRD3A	1	1_6278918	-	AT1G18260.1	40.1809272
AT1G18070	AT1G18070	2	1_6213822,1_6213805	-	AT1G18070.1,AT1G18070.2,AT1G18070.3	64.711682,20.2660315,0.0285318
AT1G17880	BTF3	15	1_6152484,1_6152483,1_6152482,1_6152478,1_6152477,1_6152476,1_6152472,1_6152461,1_6152460,1_6152459,1_6152458,1_6152457,1_6152454,1_6152453,1_6152452	-	AT1G17880.1	422.6540675
AT1G17370	UBP1B	3	1_5951683,1_5951675,1_5951674	-	AT1G17370.1,AT1G17370.2	59.1010001,0
AT1G17280	UBC34	1	1_5917032	-	AT1G17280.9,AT1G17280.4,AT1G17280.2,AT1G17280.7,AT1G17280.8,AT1G17280.3,AT1G17280.6,AT1G17280.5,AT1G17280.1	26.3799039,0.7277909,0.1387642,0.0755307,0.0549662,0.0198872,0.0025998,0
AT1G17080	AT1G17080	10	1_5840380,1_5840379,1_5840378,1_5840377,1_5840376,1_5840375,1_5840374,1_5840373,1_5840366,1_5840363	-	AT1G17080.1	84.2892005
AT1G16920	RABA1B	2	1_5787445,1_5787417	-	AT1G16920.1	71.0351367
AT1G16890	UBC36	7	1_5776474,1_5776425,1_5776395,1_5776394,1_5776393,1_5776392,1_5776386	-	AT1G16890.2,AT1G16890.1,AT1G16890.3	128.3503454,0.3581143,0.1441552
AT1G16610	SR45	7	1_5675853,1_5675852,1_5675829,1_5675795,1_5675754,1_5675752,1_5675751	-	AT1G16610.1,AT1G16610.2,AT1G16610.7,AT1G16610.6,AT1G16610.5,AT1G16610.3,AT1G16610.4	41.603811,7.3959817,0.4318889,0.2878104,0.2837854,0.2438052,0
AT1G16460	STR2	2	1_5619720,1_5619715	-	AT1G16460.1,AT1G16460.6,AT1G16460.3,AT1G16460.4,AT1G16460.2,AT1G16460.5	34.6457672,1.0080797,0.6469262,0.318451,0.139202,0.072759
AT1G16240	SYP51	1	1_5555067	-	AT1G16240.1,AT1G16240.2,AT1G16240.4,AT1G16240.3	58.0004034,3.7984656,0.1045368,0.0205531
AT1G15880	GOS11	1	1_5458620	-	AT1G15880.1	28.2494582
AT1G15820	LHCB6	15	1_5446736,1_5446735,1_5446666,1_5446661,1_5446660,1_5446652,1_5446651,1_5446650,1_5446649,1_5446648,1_5446639,1_5446603,1_5446602,1_5446600,1_5446573	-	AT1G15820.1	3047.5360539
AT1G15750	TPL	1	1_5415007	-	AT1G15750.4,AT1G15750.2,AT1G15750.1,AT1G15750.3	33.1229643,7.8829446,1.6530796,0.5428385
AT1G15340	MBD10	1	1_5275724	-	AT1G15340.1,AT1G15340.2	67.289712,0.5056476
AT1G15270	AT1G15270	20	1_5250793,1_5250753,1_5250752,1_5250751,1_5250750,1_5250749,1_5250748,1_5250747,1_5250746,1_5250745,1_5250744,1_5250743,1_5250742,1_5250741,1_5250714,1_5250711,1_5250707,1_5250701,1_5250690,1_5250689	-	AT1G15270.1	609.4745445
AT1G15140	AT1G15140	5	1_5210386,1_5210376,1_5210375,1_5210374,1_5210373	-	AT1G15140.1,AT1G15140.2,AT1G15140.3	67.8089724,0.1470672,0.0508835
AT1G15090	AT1G15090	5	1_5189727,1_5189726,1_5189725,1_5189724,1_5189723	-	AT1G15090.1	NA
AT1G14980	CPN10	15	1_5165848,1_5165847,1_5165846,1_5165817,1_5165814,1_5165813,1_5165812,1_5165811,1_5165802,1_5165797,1_5165796,1_5165776,1_5165775,1_5165774,1_5165771	-	AT1G14980.1,AT1G14980.2	209.1767697,0.1625629
AT1G14830	DRP1C	6	1_5107610,1_5107609,1_5107512,1_5107511,1_5107510,1_5107496	-	AT1G14830.1	60.0401611
AT1G14610	VALRS	6	1_5008372,1_5008371,1_5008370,1_5008369,1_5008366,1_5008365	-	AT1G14610.1	42.6310932
AT1G14450	AT1G14450	13	1_4946407,1_4946401,1_4946375,1_4946374,1_4946373,1_4946372,1_4946371,1_4946328,1_4946316,1_4946299,1_4946298,1_4946296,1_4946295	-	AT1G14450.1,AT1G14450.2	319.1998259,0.4916054
AT1G14400	UBC1	13	1_4927280,1_4927278,1_4927252,1_4927218,1_4927188,1_4927187,1_4927186,1_4927180,1_4927173,1_4927172,1_4927171,1_4927169,1_4927168	-	AT1G14400.1,AT1G14400.2	68.7760993,60.3061196
AT1G14270	AT1G14270	2	1_4874964,1_4874963	-	AT1G14270.1,AT1G14270.3,AT1G14270.2,AT1G14270.4	32.2836358,7.1508601,0.4732793,0.2597549
AT1G13560	AAPT1	4	1_4638694,1_4638693,1_4638691,1_4638676	-	AT1G13560.1,AT1G13560.2,AT1G13560.3	52.7692003,0.0357172,0.0206146
AT1G13440	GAPC2	13	1_4608429,1_4608428,1_4608427,1_4608426,1_4608401,1_4608374,1_4608327,1_4608318,1_4608310,1_4608298,1_4608297,1_4608296,1_4608274	-	AT1G13440.1,AT1G13440.2	1069.589084,4.823727
AT1G12920	ERF1-2	1	1_4396411	-	AT1G12920.1	76.4011351
AT1G12900	GAPA2	10	1_4392568,1_4392545,1_4392529,1_4392528,1_4392527,1_4392526,1_4392525,1_4392524,1_4392499,1_4392493	-	AT1G12900.1,AT1G12900.5,AT1G12900.3,AT1G12900.2	621.5108139,1.5868401,0.138948,0.082216
AT1G12800	AT1G12800	2	1_4361650,1_4361649	-	AT1G12800.1	55.7142928
AT1G12310	CML13	2	1_4187424,1_4187382	-	AT1G12310.1	96.9316675
AT1G12000	PFP-BETA1	6	1_4050095,1_4050093,1_4050092,1_4050091,1_4050090,1_4050087	-	AT1G12000.1	160.0720036
AT1G11910	APA1	19	1_4017051,1_4017049,1_4017048,1_4017047,1_4017040,1_4016996,1_4016964,1_4016962,1_4016944,1_4016941,1_4016937,1_4016929,1_4016923,1_4016922,1_4016913,1_4016912,1_4016911,1_4016897,1_4016896	-	AT1G11910.1,AT1G11910.2	413.9459646,0.1688501
AT1G10865	AT1G10865	1	1_3614712	-	AT1G10865.1,AT1G10865.2	44.0073656,8.6352801
AT1G10840	TIF3H1	5	1_3607782,1_3607732,1_3607731,1_3607728,1_3607727	-	AT1G10840.1,AT1G10840.2	109.4555174,0.0210811
AT1G10630	ATARFA1F	9	1_3513094,1_3513067,1_3513045,1_3513044,1_3513043,1_3513042,1_3513014,1_3513013,1_3513012	-	AT1G10630.1,AT1G10630.2	136.9535072,0.2203843
AT1G10590	AT1G10590	8	1_3502232,1_3502231,1_3502230,1_3502223,1_3502222,1_3502150,1_3502147,1_3502082	-	AT1G10590.1,AT1G10590.2,AT1G10590.3	161.2594793,22.4617444,4.420509
AT1G10500	ISCA	11	1_3460121,1_3460100,1_3460099,1_3460098,1_3460090,1_3460089,1_3460088,1_3460041,1_3460031,1_3460030,1_3460029	-	AT1G10500.1	58.0773412
AT1G10200	WLIM1	1	1_3346492	-	AT1G10200.1,AT1G10200.2	92.6801996,1.4085263
AT1G09920	AT1G09920	2	1_3224785,1_3224784	-	AT1G09920.1	43.7012629
AT1G09780	PGM1	8	1_3165449,1_3165448,1_3165447,1_3165446,1_3165445,1_3165444,1_3165443,1_3165442	-	AT1G09780.1	227.6781117
AT1G09760	U2A'	4	1_3159232,1_3159231,1_3159229,1_3159200	-	AT1G09760.1	65.5936602
AT1G09690	RPL21A	16	1_3136382,1_3136380,1_3136355,1_3136354,1_3136348,1_3136347,1_3136346,1_3136345,1_3136344,1_3136334,1_3136333,1_3136324,1_3136314,1_3136313,1_3136312,1_3136311	-	AT1G09690.1	1225.5007036
AT1G09570	PHYA	3	1_3095400,1_3095352,1_3095351	-	AT1G09570.1,AT1G09570.4,AT1G09570.2,AT1G09570.6,AT1G09570.3,AT1G09570.5	18.3460029,12.6847525,5.979214,0.7806286,0.2317132,0.0575277
AT1G09330	ECH	7	1_3012852,1_3012808,1_3012807,1_3012806,1_3012805,1_3012799,1_3012798	-	AT1G09330.1,AT1G09330.2	56.5191239,0.1989378
AT1G09210	CRT2	7	1_2973145,1_2973110,1_2973085,1_2973081,1_2973067,1_2973066,1_2973065	-	AT1G09210.1	205.8834365
AT1G09130	CLPR3	6	1_2939769,1_2939699,1_2939695,1_2939685,1_2939684,1_2939666	-	AT1G09130.1,AT1G09130.3	102.9913639,0.0375818
AT1G09020	SNF4	4	1_2899981,1_2899980,1_2899964,1_2899931	-	AT1G09020.1	34.6940553
AT1G08640	CJD1	4	1_2748523,1_2748514,1_2748480,1_2748476	-	AT1G08640.1	50.639859
AT1G08490	NFS2	1	1_2685823	-	AT1G08490.1	28.0063086
AT1G08380	PSAO	14	1_2641011,1_2640992,1_2640978,1_2640977,1_2640951,1_2640950,1_2640949,1_2640948,1_2640947,1_2640946,1_2640945,1_2640944,1_2640926,1_2640925	-	AT1G08380.1	2788.2256922
AT1G08200	AXS2	24	1_2574227,1_2574203,1_2574202,1_2574199,1_2574198,1_2574184,1_2574155,1_2574154,1_2574153,1_2574152,1_2574076,1_2574056,1_2574045,1_2574044,1_2574043,1_2574042,1_2574041,1_2574040,1_2574039,1_2574038,1_2574037,1_2574030,1_2574029,1_2574028	-	AT1G08200.1	199.3292986
AT1G07940	A3	19	1_2463187,1_2463186,1_2463151,1_2463148,1_2463147,1_2463146,1_2463145,1_2463144,1_2463130,1_2463129,1_2463122,1_2463121,1_2463114,1_2463113,1_2463112,1_2463111,1_2463106,1_2463105,1_2463104	-	AT1G07940.1,AT1G07940.2,AT1G07940.4,AT1G07940.3	645.4199473,5.5990948,1.6072337,1.4494436
AT1G07770	RPS15AA	21	1_2408373,1_2408372,1_2408370,1_2408365,1_2408356,1_2408355,1_2408354,1_2408353,1_2408352,1_2408351,1_2408350,1_2408349,1_2408329,1_2408325,1_2408319,1_2408318,1_2408313,1_2408308,1_2408307,1_2408306,1_2408303	-	AT1G07770.3,AT1G07770.2,AT1G07770.1	433.0582658,246.0287725,45.1955098
AT1G07590	AT1G07590	16	1_2338786,1_2338785,1_2338713,1_2338712,1_2338711,1_2338710,1_2338709,1_2338708,1_2338707,1_2338705,1_2338703,1_2338699,1_2338698,1_2338685,1_2338670,1_2338669	-	AT1G07590.1	1848.7773375
AT1G07140	RANBP1A	6	1_2192125,1_2192109,1_2192108,1_2192078,1_2192042,1_2192041	-	AT1G07140.1	206.0235877
AT1G07110	FKFBP	2	1_2178191,1_2178161	-	AT1G07110.1	26.2856435
AT1G06950	TIC110	2	1_2130230,1_2130184	-	AT1G06950.1	74.1237517
AT1G06700	PTI11	4	1_2052735,1_2052734,1_2052730,1_2052610	-	AT1G06700.1,AT1G06700.2,AT1G06700.3	31.6726263,9.5716475,0.349947
AT1G06515	AT1G06515	3	1_1990740,1_1990738,1_1990737	-	AT1G06515.2,AT1G06515.1	34.7800307,6.1249885
AT1G06430	FTSH8	6	1_1960181,1_1960180,1_1960179,1_1960139,1_1960138,1_1960100	-	AT1G06430.1,AT1G06430.3,AT1G06430.2	20.8995479,12.8716853,0.4223999
AT1G06400	RABA1A	1	1_1951008	-	AT1G06400.1	46.5218536
AT1G06040	BBX24	5	1_1828643,1_1828642,1_1828601,1_1828529,1_1828496	-	AT1G06040.1,AT1G06040.2	177.0823463,5.206163
AT1G05850	CTL1	17	1_1766788,1_1766766,1_1766740,1_1766739,1_1766738,1_1766737,1_1766725,1_1766695,1_1766694,1_1766691,1_1766665,1_1766660,1_1766659,1_1766658,1_1766657,1_1766655,1_1766639	-	AT1G05850.1,AT1G05850.2	469.4200378,0.0947617
AT1G05190	RPL6	14	1_1502506,1_1502491,1_1502465,1_1502442,1_1502441,1_1502440,1_1502436,1_1502433,1_1502429,1_1502428,1_1502426,1_1502401,1_1502400,1_1502399	-	AT1G05190.1	359.2822501
AT1G05180	AXR1	3	1_1498276,1_1498272,1_1498271	-	AT1G05180.1,AT1G05180.3,AT1G05180.2	28.3868343,0.0547705,0
AT1G04985	AT1G04985	1	1_1416493	-	AT1G04985.1,AT1G04985.2	16.3520689,0.4448942
AT1G04850	AT1G04850	3	1_1365255,1_1365218,1_1365210	-	AT1G04850.1,AT1G04850.2	88.9806819,0.0902994
AT1G04820	TUBA4	4	1_1356377,1_1356303,1_1356302,1_1356252	-	AT1G04820.1	481.9106602
AT1G04750	VAMP721	8	1_1331814,1_1331813,1_1331695,1_1331694,1_1331679,1_1331671,1_1331669,1_1331668	-	AT1G04750.1,AT1G04750.3,AT1G04750.4,AT1G04750.2	101.335797,0.358094,0.061061,0.0278691
AT1G04530	TPR4	4	1_1234336,1_1234335,1_1234301,1_1234300	-	AT1G04530.1	41.8111201
AT1G04410	MDH1	23	1_1189375,1_1189283,1_1189282,1_1189281,1_1189266,1_1189250,1_1189249,1_1189248,1_1189245,1_1189244,1_1189243,1_1189242,1_1189241,1_1189240,1_1189235,1_1189231,1_1189230,1_1189229,1_1189227,1_1189226,1_1189225,1_1189224,1_1189223	-	AT1G04410.1	1130.2350038
AT1G04270	RPS15A	19	1_1141831,1_1141780,1_1141771,1_1141769,1_1141756,1_1141755,1_1141754,1_1141725,1_1141724,1_1141723,1_1141722,1_1141721,1_1141720,1_1141719,1_1141718,1_1141717,1_1141711,1_1141710,1_1141709	-	AT1G04270.1,AT1G04270.2	906.3889727,0.0962796
AT1G03860	PHB2	2	1_979437,1_979426	-	AT1G03860.1,AT1G03860.3,AT1G03860.2	102.3075916,0.9508009,0.5865897
AT1G03680	ATHM1	6	1_916961,1_916960,1_916958,1_916931,1_916913,1_916878	-	AT1G03680.1	211.7005734
AT1G03330	LSM2	7	1_818121,1_818120,1_818090,1_818089,1_818087,1_818043,1_818042	-	AT1G03330.1	68.2928339
AT1G02780	RPL19A	21	1_608045,1_608043,1_608042,1_608041,1_608021,1_608020,1_608019,1_608018,1_608017,1_608016,1_608010,1_608009,1_607985,1_607984,1_607983,1_607976,1_607965,1_607964,1_607961,1_607951,1_607950	-	AT1G02780.1	1540.4895407
AT1G02280	TOC33	2	1_448535,1_448534	-	AT1G02280.1,AT1G02280.2	84.4907294,16.0805556
AT1G02140	MEE63	12	1_403427,1_403382,1_403318,1_403296,1_403295,1_403294,1_403293,1_403281,1_403280,1_403265,1_403264,1_403263	-	AT1G02140.1	288.66115
AT1G01910	AT1G01910	2	1_313319,1_313318	-	AT1G01910.1,AT1G01910.2,AT1G01910.4,AT1G01910.3,AT1G01910.5	31.5457982,27.884854,3.4204621,0.4125838,0.0310732
AT1G01820	PEX11C	1	1_296085	-	AT1G01820.1	47.0071229
AT1G01620	PIP1-3	4	1_225948,1_225932,1_225924,1_225894	-	AT1G01620.1,AT1G01620.2	700.8370129,0.65309
AT1G01610	GPAT4	3	1_221833,1_221826,1_221823	-	AT1G01610.1	48.4533732
AT1G01170	AT1G01170	8	1_74080,1_74076,1_74052,1_74047,1_74046,1_74045,1_74044,1_74012	-	AT1G01170.1,AT1G01170.2	133.6744951,4.6373618
AT1G01100	RPP1A	20	1_50236,1_50235,1_50234,1_50216,1_50215,1_50214,1_50206,1_50205,1_50185,1_50183,1_50177,1_50176,1_50168,1_50167,1_50166,1_50164,1_50162,1_50161,1_50154,1_50148	-	AT1G01100.2,AT1G01100.3,AT1G01100.1,AT1G01100.4	755.8547369,19.6348191,14.2000565,0.9810039
AT1G01090	PDH-E1 ALPHA	7	1_47641,1_47640,1_47592,1_47584,1_47583,1_47582,1_47581	-	AT1G01090.1	162.894626
AT1G01060	LHY	1	1_33787	-	AT1G01060.4,AT1G01060.1,AT1G01060.7,AT1G01060.2	8.2119602,4.795221,0.5096426,0.1933178
AT1G01050	PPA1	2	1_31306,1_31277	-	AT1G01050.1	104.4510579
AT2G01010	AT2G01010	9	2_4179,2_4180,2_4181,2_4182,2_4183,2_4184,2_4185,2_5029,2_5030	+	AT2G01010.1	NA
AT2G01090	AT2G01090	3	2_80968,2_81027,2_81063	+	AT2G01090.4,AT2G01090.2,AT2G01090.1,AT2G01090.3	18.404607,1.6566334,1.012113,0
AT2G01490	PAHX	3	2_223250,2_223359,2_223383	+	AT2G01490.1	34.9557141
AT2G01600	AT2G01600	2	2_272438,2_272442	+	AT2G01600.1	45.4346485
AT2G02050	AT2G02050	17	2_491796,2_491840,2_491841,2_491870,2_491871,2_491872,2_491873,2_491874,2_491875,2_491876,2_491877,2_491882,2_491885,2_491895,2_491896,2_491899,2_491910	+	AT2G02050.1	189.5980551
AT2G02390	GSTZ1	8	2_630983,2_630991,2_631035,2_631042,2_631060,2_631072,2_631073,2_631074	+	AT2G02390.1,AT2G02390.3,AT2G02390.4	109.1952372,29.5129357,0.8386575
AT2G02510	AT2G02510	7	2_674564,2_674565,2_674566,2_674568,2_674569,2_674583,2_674653	+	AT2G02510.1	173.2640532
AT2G02560	CAND1	2	2_697348,2_697371	+	AT2G02560.1,AT2G02560.2	12.3497041,10.304537
AT2G02760	UBC2	4	2_775162,2_775171,2_775172,2_775173	+	AT2G02760.1,AT2G02760.4,AT2G02760.2,AT2G02760.3	64.3032081,0.7334757,0.5740202,0.3581207
AT2G03120	SPP	4	2_940223,2_940232,2_940255,2_940308	+	AT2G03120.1	78.6104334
AT2G03680	SPR1	16	2_1121869,2_1121924,2_1121925,2_1121926,2_1121945,2_1121958,2_1121970,2_1121971,2_1121972,2_1121973,2_1121988,2_1121989,2_1121990,2_1121991,2_1121992,2_1121993	+	AT2G03680.1,AT2G03680.2	591.3319344,0.8228003
AT2G03870	LSM7	2	2_1181260,2_1181317	+	AT2G03870.2,AT2G03870.1	73.4373023,0.4680283
AT2G04030	CR88	2	2_1285940,2_1285941	+	AT2G04030.1,AT2G04030.2	127.6037743,0.0822353
AT2G04039	AT2G04039	2	2_1334465,2_1334471	+	AT2G04039.1,AT2G04039.2,AT2G04039.3	24.2814987,0.7912646,0.0975515
AT2G04390	RPS17A	2	2_1528358,2_1528442	+	AT2G04390.1	359.3104561
AT2G04700	FTRC	7	2_1648428,2_1648434,2_1648450,2_1648460,2_1648463,2_1648488,2_1648498	+	AT2G04700.1,AT2G04700.2	34.7976946,5.9609109
AT2G04900	AT2G04900	8	2_1723673,2_1723674,2_1723675,2_1723676,2_1723679,2_1723680,2_1723770,2_1723771	+	AT2G04900.1	90.3523499
AT2G05380	GRP3S	5	2_1967929,2_1967932,2_1967944,2_1967991,2_1967992	+	AT2G05380.1,AT2G05380.3,AT2G05380.2	1144.3744872,34.2665453,5.7165836
AT2G05710	ACO2	13	2_2146418,2_2146419,2_2146497,2_2146498,2_2146499,2_2146500,2_2146501,2_2146502,2_2146503,2_2146504,2_2146506,2_2146507,2_2146560	+	AT2G05710.1	170.7640734
AT2G05830	AT2G05830	4	2_2231915,2_2231916,2_2231929,2_2231930	+	AT2G05830.1,AT2G05830.2,AT2G05830.3,AT2G05830.4	35.7378359,0.7417535,0.2750052,0.0902951
AT2G05840	PAA2	4	2_2236174,2_2236175,2_2236176,2_2236219	+	AT2G05840.1,AT2G05840.3,AT2G05840.2	89.703351,0.2852958,0
AT2G07050	CAS1	4	2_2930346,2_2930431,2_2930477,2_2930480	+	AT2G07050.1,AT2G07050.2	52.0030914,0.042965
AT2G09990	RPS16A	4	2_3781940,2_3781941,2_3781991,2_3781993	+	AT2G09990.1	236.8161864
AT2G12510	AT2G12510	15	2_5099970,2_5099972,2_5099974,2_5099975,2_5099976,2_5099978,2_5099979,2_5099980,2_5099981,2_5099986,2_5099990,2_5099991,2_5099992,2_5099993,2_5099994	+	AT2G12510.1	NA
AT2G13560	NAD-ME1	1	2_5655254	+	AT2G13560.1	78.9570031
AT2G14045	AT2G14045	3	2_5908202,2_5908203,2_5908204	+	AT2G14045.1,AT2G14045.2,AT2G14045.4	18.6546089,1.2395839,1.1598229
AT2G14890	AGP9	9	2_6400820,2_6400865,2_6400866,2_6400870,2_6400899,2_6400900,2_6400901,2_6400902,2_6400910	+	AT2G14890.1,AT2G14890.2	265.2377806,3.0447508
AT2G15970	COR413PM1	3	2_6951070,2_6951071,2_6951083	+	AT2G15970.1,AT2G15970.2	542.2002814,4.7203711
AT2G16950	TRN1	2	2_7360966,2_7360967	+	AT2G16950.2,AT2G16950.1	30.1280421,0
AT2G17360	RPS4A	12	2_7548199,2_7548226,2_7548241,2_7548242,2_7548251,2_7548252,2_7548253,2_7548264,2_7548265,2_7548269,2_7548270,2_7548271	+	AT2G17360.1,AT2G17360.2	443.6957944,0
AT2G17380	AAP19-1	4	2_7554924,2_7554932,2_7554933,2_7554980	+	AT2G17380.1	72.8801206
AT2G17420	NTRA	9	2_7566341,2_7566354,2_7566387,2_7566395,2_7566421,2_7566426,2_7566427,2_7566428,2_7566466	+	AT2G17420.1,AT2G17420.2	290.6151441,0.8162174
AT2G17720	P4H5	3	2_7699482,2_7699515,2_7699516	+	AT2G17720.1	82.8533843
AT2G18020	RPL8A	26	2_7838206,2_7838207,2_7838220,2_7838221,2_7838222,2_7838223,2_7838224,2_7838225,2_7838226,2_7838227,2_7838228,2_7838229,2_7838234,2_7838235,2_7838236,2_7838237,2_7838238,2_7838239,2_7838240,2_7838251,2_7838255,2_7838256,2_7838257,2_7838258,2_7838259,2_7838269	+	AT2G18020.1	1089.9868605
AT2G18040	PIN1	9	2_7843660,2_7843661,2_7843662,2_7843666,2_7843669,2_7843670,2_7843671,2_7843676,2_7843736	+	AT2G18040.1	147.210307
AT2G18110	AT2G18110	6	2_7873789,2_7873796,2_7873811,2_7873812,2_7873813,2_7873836	+	AT2G18110.1	143.5202313
AT2G18280	TULP2	1	2_7948297	+	AT2G18280.1,AT2G18280.2	68.2974616,11.4617579
AT2G18740	AT2G18740	6	2_8124776,2_8124825,2_8124838,2_8124839,2_8124840,2_8124963	+	AT2G18740.1,AT2G18740.2	59.9121025,1.3827519
AT2G18960	AHA1	10	2_8227358,2_8227415,2_8227429,2_8227443,2_8227444,2_8227446,2_8227447,2_8227448,2_8227451,2_8227456	+	AT2G18960.1,AT2G18960.2,AT2G18960.3	249.5298431,0.576371,0.3135761
AT2G19680	AT2G19680	8	2_8502638,2_8502698,2_8502702,2_8502703,2_8502737,2_8502746,2_8502757,2_8502758	+	AT2G19680.2,AT2G19680.1	70.7057572,32.5714536
AT2G19730	RPL28A	13	2_8513048,2_8513049,2_8513076,2_8513078,2_8513079,2_8513100,2_8513174,2_8513175,2_8513176,2_8513185,2_8513186,2_8513187,2_8513188	+	AT2G19730.1,AT2G19730.2,AT2G19730.3	478.2587545,382.7569486,3.504859
AT2G19740	RPL31A	7	2_8514449,2_8514456,2_8514459,2_8514464,2_8514465,2_8514467,2_8514479	+	AT2G19740.1	186.4965867
AT2G19750	RPS30C	7	2_8515863,2_8515958,2_8515960,2_8515989,2_8516041,2_8516042,2_8516053	+	AT2G19750.1	287.9950206
AT2G19790	AT2G19790	5	2_8528453,2_8528454,2_8528465,2_8528466,2_8528467	+	AT2G19790.1	86.7337559
AT2G19940	AT2G19940	1	2_8615892	+	AT2G19940.1,AT2G19940.2,AT2G19940.3	33.4178276,2.9867859,1.1550398
AT2G20230	TOM2AH2	2	2_8727563,2_8727589	+	AT2G20230.1	92.6553115
AT2G20260	PSAE2	14	2_8737584,2_8737680,2_8737682,2_8737683,2_8737684,2_8737685,2_8737686,2_8737687,2_8737688,2_8737689,2_8737691,2_8737699,2_8737704,2_8737713	+	AT2G20260.1	825.4995059
AT2G20360	AT2G20360	6	2_8789136,2_8789195,2_8789215,2_8789248,2_8789323,2_8789343	+	AT2G20360.1	192.5969453
AT2G20420	AT2G20420	10	2_8807917,2_8807920,2_8807921,2_8807922,2_8807924,2_8807932,2_8807944,2_8808020,2_8808040,2_8808067	+	AT2G20420.1	174.0198043
AT2G20450	RPL14A	7	2_8815098,2_8815099,2_8815100,2_8815101,2_8815149,2_8815170,2_8815171	+	AT2G20450.1	342.4252814
AT2G20530	PHB6	3	2_8843874,2_8843875,2_8843904	+	AT2G20530.1,AT2G20530.2	86.4635833,0.304952
AT2G20570	GLK1	6	2_8857633,2_8857634,2_8857646,2_8857648,2_8857686,2_8857724	+	AT2G20570.1,AT2G20570.3,AT2G20570.2	74.806874,0.3791856,0.0115723
AT2G20820	AT2G20820	17	2_8965233,2_8965234,2_8965258,2_8965259,2_8965260,2_8965263,2_8965284,2_8965285,2_8965296,2_8965306,2_8965314,2_8965334,2_8965336,2_8965337,2_8965344,2_8965350,2_8965352	+	AT2G20820.1,AT2G20820.2	309.8095951,5.0995663
AT2G20860	LIP1	2	2_8981027,2_8981046	+	AT2G20860.2,AT2G20860.3,AT2G20860.1	118.3183933,1.0349272,0
AT2G20890	THF1	18	2_8989202,2_8989203,2_8989204,2_8989205,2_8989213,2_8989214,2_8989215,2_8989216,2_8989217,2_8989237,2_8989249,2_8989250,2_8989253,2_8989263,2_8989291,2_8989292,2_8989295,2_8989296	+	AT2G20890.1	205.8572158
AT2G20920	AT2G20920	1	2_8999897	+	AT2G20920.1	35.0960769
AT2G20990	SYT1	4	2_9017890,2_9017902,2_9017952,2_9017953	+	AT2G20990.1,AT2G20990.2,AT2G20990.3	147.5681865,1.565613,0.2585786
AT2G21045	STR19	4	2_9028937,2_9028938,2_9028948,2_9028949	+	AT2G21045.1	213.0219626
AT2G21160	AT2G21160	14	2_9070325,2_9070326,2_9070339,2_9070349,2_9070350,2_9070351,2_9070352,2_9070353,2_9070354,2_9070355,2_9070361,2_9070362,2_9070370,2_9070382	+	AT2G21160.1,AT2G21160.2	282.1161002,0.0668075
AT2G21290	AT2G21290	2	2_9113256,2_9113317	+	AT2G21290.1	122.5674753
AT2G21390	AT2G21390	4	2_9156803,2_9156818,2_9156819,2_9156820	+	AT2G21390.1	67.3871652
AT2G21410	VHA-A2	3	2_9168304,2_9168305,2_9168308	+	AT2G21410.1	31.1936127
AT2G21580	RPS25B	10	2_9237570,2_9237575,2_9237576,2_9237620,2_9237638,2_9237639,2_9237648,2_9237649,2_9237667,2_9237670	+	AT2G21580.1,AT2G21580.2	445.5262592,0.9802504
AT2G21600	RER1B	2	2_9244755,2_9244758	+	AT2G21600.1	57.8375245
AT2G21960	AT2G21960	2	2_9357012,2_9357013	+	AT2G21960.1	52.7852396
AT2G22425	AT2G22425	2	2_9515422,2_9515423	+	AT2G22425.2,AT2G22425.1	148.9634522,47.6666023
AT2G22540	SVP	1	2_9583790	+	AT2G22540.3,AT2G22540.1,AT2G22540.2	24.592457,10.9267835,0.0069239
AT2G22670	IAA8	6	2_9638519,2_9638584,2_9638585,2_9638586,2_9638600,2_9638601	+	AT2G22670.1,AT2G22670.5,AT2G22670.4,AT2G22670.2,AT2G22670.3	122.7118259,1.3522421,1.3061674,1.2473463,1.1711925
AT2G22990	SCPL8	10	2_9790055,2_9790056,2_9790057,2_9790098,2_9790099,2_9790100,2_9790101,2_9790106,2_9790110,2_9790111	+	AT2G22990.1,AT2G22990.4,AT2G22990.6,AT2G22990.3,AT2G22990.2,AT2G22990.5	60.1748828,9.0850577,1.434536,1.4233377,0.2083166,0.1139199
AT2G23310	RER1C	5	2_9919008,2_9919080,2_9919163,2_9919176,2_9919216	+	AT2G23310.1,AT2G23310.2	27.5608774,26.6063806
AT2G23350	PAB4	15	2_9946056,2_9946057,2_9946058,2_9946059,2_9946060,2_9946061,2_9946062,2_9946065,2_9946066,2_9946070,2_9946163,2_9946184,2_9946185,2_9946186,2_9946226	+	AT2G23350.1	167.6789829
AT2G23930	SNRNP-G	17	2_10183019,2_10183022,2_10183023,2_10183053,2_10183056,2_10183057,2_10183063,2_10183064,2_10183065,2_10183067,2_10183068,2_10183072,2_10183108,2_10183109,2_10183127,2_10183166,2_10183167	+	AT2G23930.1,AT2G23930.2	227.3686538,0.136208
AT2G24090	AT2G24090	9	2_10243456,2_10243478,2_10243481,2_10243486,2_10243487,2_10243489,2_10243490,2_10243491,2_10243492	+	AT2G24090.1	368.6844867
AT2G24420	AT2G24420	5	2_10383151,2_10383252,2_10383253,2_10383254,2_10383298	+	AT2G24420.1,AT2G24420.2	36.7205018,4.0588298
AT2G24940	MP3	13	2_10609767,2_10609783,2_10609812,2_10609814,2_10609815,2_10609822,2_10609840,2_10609843,2_10609844,2_10609845,2_10609846,2_10609847,2_10609848	+	AT2G24940.1	901.694205
AT2G25080	GPX1	21	2_10669842,2_10669886,2_10669907,2_10669908,2_10669909,2_10669910,2_10669916,2_10669917,2_10669918,2_10669921,2_10669922,2_10669925,2_10669926,2_10669928,2_10669929,2_10669946,2_10669949,2_10669951,2_10669952,2_10669958,2_10669960	+	AT2G25080.1	115.6712602
AT2G25210	AT2G25210	14	2_10740409,2_10740444,2_10740445,2_10740446,2_10740453,2_10740454,2_10740455,2_10740456,2_10740457,2_10740476,2_10740490,2_10740491,2_10740521,2_10740529	+	AT2G25210.1	942.3381216
AT2G26210	AT2G26210	3	2_11159163,2_11159166,2_11159167	+	AT2G26210.1,AT2G26210.2,AT2G26210.7,AT2G26210.4,AT2G26210.5,AT2G26210.6,AT2G26210.3	17.3436276,5.7998695,5.3328667,0.4233863,0.1497523,0.086801,0.0621208
AT2G26230	AT2G26230	4	2_11167073,2_11167074,2_11167092,2_11167093	+	AT2G26230.1	36.1167291
AT2G26500	AT2G26500	22	2_11270779,2_11270780,2_11270781,2_11270787,2_11270791,2_11270792,2_11270802,2_11270803,2_11270807,2_11270812,2_11270813,2_11270814,2_11270815,2_11270823,2_11270824,2_11270825,2_11270832,2_11270833,2_11270837,2_11270839,2_11270840,2_11270855	+	AT2G26500.1,AT2G26500.2,AT2G26500.3	248.9062155,245.1446203,0.7308112
AT2G26670	HO1	2	2_11343512,2_11343545	+	AT2G26670.1,AT2G26670.2	82.4679699,5.5852956
AT2G26910	ABCG32	4	2_11487897,2_11487945,2_11488008,2_11488009	+	AT2G26910.1	15.058014
AT2G27030	CAM2	6	2_11533103,2_11533151,2_11533152,2_11533177,2_11533178,2_11533179	+	AT2G27030.1	140.0235632
AT2G27600	SKD1	3	2_11783771,2_11783815,2_11783818	+	AT2G27600.1	74.8337067
AT2G27710	RPP2B	20	2_11817710,2_11817755,2_11817756,2_11817757,2_11817758,2_11817760,2_11817765,2_11817766,2_11817767,2_11817768,2_11817769,2_11817770,2_11817771,2_11817772,2_11817773,2_11817775,2_11817788,2_11817789,2_11817801,2_11817802	+	AT2G27710.1,AT2G27710.2,AT2G27710.3,AT2G27710.4	671.4747701,188.846105,52.3103507,1.2868197
AT2G27720	RPP2A	21	2_11819434,2_11819435,2_11819436,2_11819437,2_11819438,2_11819440,2_11819445,2_11819446,2_11819447,2_11819459,2_11819469,2_11819470,2_11819471,2_11819472,2_11819480,2_11819481,2_11819482,2_11819483,2_11819484,2_11819485,2_11819486	+	AT2G27720.1,AT2G27720.4,AT2G27720.3,AT2G27720.2	592.8536046,1.0072754,0.2980086,0.2503791
AT2G28000	CPN60A1	4	2_11929278,2_11929320,2_11929321,2_11929322	+	AT2G28000.1	270.9253871
AT2G28370	AT2G28370	7	2_12133494,2_12133578,2_12133580,2_12133581,2_12133582,2_12133583,2_12133622	+	AT2G28370.1	49.736033
AT2G28520	VHA-A1	2	2_12215699,2_12215712	+	AT2G28520.1	17.7954205
AT2G30050	SEC13B	4	2_12826520,2_12826615,2_12826616,2_12826617	+	AT2G30050.1	96.8387031
AT2G30410	TFCA	2	2_12960617,2_12960618	+	AT2G30410.3,AT2G30410.2,AT2G30410.1	86.7453904,0.7850069,0.7191678
AT2G30440	TPP1	5	2_12975233,2_12975274,2_12975275,2_12975276,2_12975333	+	AT2G30440.1	69.7240263
AT2G30530	AT2G30530	1	2_13010977	+	AT2G30530.1	17.3862398
AT2G30950	FTSH2	24	2_13177095,2_13177097,2_13177098,2_13177099,2_13177106,2_13177107,2_13177108,2_13177109,2_13177110,2_13177112,2_13177113,2_13177114,2_13177115,2_13177117,2_13177118,2_13177119,2_13177120,2_13177121,2_13177122,2_13177128,2_13177129,2_13177130,2_13177131,2_13177153	+	AT2G30950.1	217.7359523
AT2G30970	ASP1	12	2_13181721,2_13181722,2_13181776,2_13181777,2_13181814,2_13181815,2_13181823,2_13181824,2_13181825,2_13181841,2_13181842,2_13181868	+	AT2G30970.2,AT2G30970.1	75.4897376,43.2322806
AT2G31090	AT2G31090	4	2_13256690,2_13256691,2_13256708,2_13256709	+	AT2G31090.1	33.825735
AT2G31350	GLX2-5	1	2_13370923	+	AT2G31350.1,AT2G31350.2,AT2G31350.3	23.8945933,20.3062722,0.9809047
AT2G31380	BBX25	6	2_13383409,2_13383438,2_13383439,2_13383440,2_13383441,2_13383442	+	AT2G31380.1	33.1448763
AT2G31490	AT2G31490	15	2_13413079,2_13413081,2_13413082,2_13413086,2_13413127,2_13413143,2_13413144,2_13413145,2_13413146,2_13413147,2_13413148,2_13413152,2_13413161,2_13413171,2_13413185	+	AT2G31490.1	474.2609269
AT2G31610	RPS3A	8	2_13451726,2_13451727,2_13451728,2_13451729,2_13451730,2_13451739,2_13451852,2_13451853	+	AT2G31610.1	440.5422289
AT2G32090	AT2G32090	2	2_13645693,2_13645706	+	AT2G32090.1,AT2G32090.2	25.8635835,1.0890363
AT2G32170	AT2G32170	2	2_13670995,2_13670996	+	AT2G32170.1,AT2G32170.2	16.2284119,0.0357136
AT2G32580	AT2G32580	2	2_13829216,2_13829235	+	AT2G32580.1,AT2G32580.2	44.3556267,0.0155064
AT2G32730	RPN2A	5	2_13885504,2_13885505,2_13885599,2_13885629,2_13885630	+	AT2G32730.1	64.4994678
AT2G32950	COP1	2	2_13983422,2_13983433	+	AT2G32950.1,AT2G32950.2	11.507091,1.0153062
AT2G33220	AT2G33220	5	2_14079980,2_14079995,2_14079996,2_14080003,2_14080009	+	AT2G33220.1	239.4661556
AT2G33450	RPL28	15	2_14174448,2_14174466,2_14174467,2_14174475,2_14174483,2_14174484,2_14174485,2_14174486,2_14174489,2_14174490,2_14174491,2_14174495,2_14174497,2_14174511,2_14174512	+	AT2G33450.1	304.594717
AT2G34160	AT2G34160	1	2_14427345	+	AT2G34160.1	34.0373931
AT2G34250	AT2G34250	7	2_14464742,2_14464766,2_14464767,2_14464784,2_14464788,2_14464789,2_14464834	+	AT2G34250.1,AT2G34250.2,AT2G34250.3	283.2028732,1.2567196,0.0670129
AT2G34460	AT2G34460	7	2_14530703,2_14530731,2_14530771,2_14530785,2_14530796,2_14530804,2_14530812	+	AT2G34460.1	73.3727011
AT2G34560	AT2G34560	1	2_14562742	+	AT2G34560.1,AT2G34560.2	67.2179016,21.0415339
AT2G34690	ACD11	1	2_14631849	+	AT2G34690.1	47.0114699
AT2G34860	EDA3	13	2_14710049,2_14710051,2_14710052,2_14710053,2_14710057,2_14710058,2_14710068,2_14710069,2_14710077,2_14710082,2_14710083,2_14710084,2_14710112	+	AT2G34860.1,AT2G34860.2	95.9681938,14.0042697
AT2G35050	AT2G35050	3	2_14774798,2_14774871,2_14774877	+	AT2G35050.1,AT2G35050.2	29.3873494,3.3933813
AT2G35370	GDH1	17	2_14892080,2_14892083,2_14892102,2_14892103,2_14892104,2_14892108,2_14892109,2_14892112,2_14892113,2_14892115,2_14892116,2_14892117,2_14892118,2_14892121,2_14892122,2_14892123,2_14892124	+	AT2G35370.1	233.7838587
AT2G35410	AT2G35410	1	2_14899654	+	AT2G35410.1	52.6113871
AT2G35635	RUB2	3	2_14981988,2_14982012,2_14982044	+	AT2G35635.1	97.9233953
AT2G35790	AT2G35790	4	2_15042018,2_15042040,2_15042041,2_15042042	+	AT2G35790.1	78.7964683
AT2G35795	TIM14-1	2	2_15043415,2_15043416	+	AT2G35795.1	56.3575312
AT2G35810	AT2G35810	1	2_15050165	+	AT2G35810.2,AT2G35810.1	73.4515157,0.1195339
AT2G35840	SPP2	5	2_15055824,2_15055858,2_15055892,2_15055917,2_15055920	+	AT2G35840.1,AT2G35840.2,AT2G35840.4	27.200126,4.3214657,0.9116789
AT2G36130	CYP18-2	1	2_15168317	+	AT2G36130.1	63.0035056
AT2G36160	RPS14A	20	2_15171186,2_15171206,2_15171207,2_15171220,2_15171232,2_15171233,2_15171234,2_15171238,2_15171239,2_15171240,2_15171241,2_15171243,2_15171251,2_15171263,2_15171274,2_15171275,2_15171276,2_15171287,2_15171288,2_15171289	+	AT2G36160.1	722.401795
AT2G36170	RPL40B	10	2_15173075,2_15173076,2_15173077,2_15173106,2_15173107,2_15173111,2_15173112,2_15173113,2_15173130,2_15173146	+	AT2G36170.1	282.2576503
AT2G36580	AT2G36580	5	2_15342840,2_15342845,2_15342948,2_15342977,2_15342978	+	AT2G36580.1	90.3786137
AT2G36600	AT2G36600	8	2_15346183,2_15346184,2_15346191,2_15346192,2_15346193,2_15346194,2_15346195,2_15346216	+	AT2G36600.1	NA
AT2G37940	IPCS2	5	2_15879502,2_15879503,2_15879518,2_15879555,2_15879556	+	AT2G37940.2,AT2G37940.1	25.3749164,17.2125807
AT2G38040	CAC3	7	2_15916814,2_15916815,2_15916816,2_15921043,2_15921053,2_15921077,2_15921078	+	AT2G38040.1,AT2G38040.2	80.8593178,29.772709
AT2G38140	RPS31	18	2_15981482,2_15981509,2_15981510,2_15981517,2_15981518,2_15981519,2_15981526,2_15981527,2_15981535,2_15981541,2_15981542,2_15981543,2_15981561,2_15981565,2_15981566,2_15981567,2_15981568,2_15981570	+	AT2G38140.1	466.3897816
AT2G38540	LTP1	3	2_16131086,2_16131087,2_16131088	+	AT2G38540.1	1380.119007
AT2G38550	FAX3	4	2_16134372,2_16134373,2_16134374,2_16134375	+	AT2G38550.1	42.9024783
AT2G38800	AT2G38800	2	2_16219072,2_16219087	+	AT2G38800.1	47.5721475
AT2G39460	RPL23AA	10	2_16475940,2_16475967,2_16475968,2_16475978,2_16476007,2_16476008,2_16476009,2_16476010,2_16476027,2_16476050	+	AT2G39460.1,AT2G39460.2	707.001797,37.183397
AT2G39470	PNSL1	3	2_16477732,2_16477733,2_16477734	+	AT2G39470.1,AT2G39470.2,AT2G39470.3	42.552771,13.1522763,0
AT2G39760	BPM3	3	2_16586140,2_16586151,2_16586152	+	AT2G39760.1,AT2G39760.3	22.5003395,0.9574375
AT2G39770	CYT1	1	2_16590917	+	AT2G39770.1,AT2G39770.3	8.9716178,0.3706861
AT2G39780	RNS2	3	2_16593538,2_16593656,2_16593670	+	AT2G39780.1,AT2G39780.2	85.7001661,0
AT2G40060	CLC2	6	2_16728015,2_16728018,2_16728031,2_16728032,2_16728088,2_16728089	+	AT2G40060.1	85.6631838
AT2G40490	HEME2	1	2_16915101	+	AT2G40490.1	171.062251
AT2G40510	RPS26B	12	2_16919708,2_16919709,2_16919716,2_16919717,2_16919718,2_16919719,2_16919720,2_16919724,2_16919734,2_16919735,2_16919738,2_16919739	+	AT2G40510.1	395.7886375
AT2G40765	AT2G40765	16	2_17013067,2_17013068,2_17013165,2_17013192,2_17013193,2_17013196,2_17013197,2_17013201,2_17013216,2_17013217,2_17013219,2_17013227,2_17013242,2_17013256,2_17013259,2_17013260	+	AT2G40765.1	414.8239067
AT2G40840	DPE2	3	2_17050837,2_17050869,2_17050926	+	AT2G40840.1	39.6322111
AT2G41220	GLU2	4	2_17188546,2_17188547,2_17188573,2_17188574	+	AT2G41220.1	54.8039363
AT2G42210	OEP163	19	2_17591655,2_17591665,2_17591669,2_17591670,2_17591686,2_17591687,2_17591688,2_17591689,2_17591718,2_17591719,2_17591720,2_17591721,2_17591734,2_17591741,2_17591749,2_17591750,2_17591751,2_17591752,2_17591772	+	AT2G42210.1,AT2G42210.3,AT2G42210.4,AT2G42210.2,AT2G42210.5	152.2462432,53.5497324,23.1279937,0.6083008,0.2024655
AT2G42220	STR9	3	2_17593390,2_17593391,2_17593437	+	AT2G42220.1	549.0737543
AT2G42310	AT2G42310	10	2_17625707,2_17625730,2_17625743,2_17625747,2_17625782,2_17625783,2_17625784,2_17625785,2_17625792,2_17625793	+	AT2G42310.1	204.4136636
AT2G42680	MBF1A	3	2_17776231,2_17776247,2_17776248	+	AT2G42680.1	326.5699356
AT2G43010	PIF4	1	2_17888901	+	AT2G43010.1,AT2G43010.2,AT2G43010.4,AT2G43010.5,AT2G43010.3	8.5864975,5.6997655,1.0203019,0.8584602,0.0598437
AT2G43030	RPL3A	1	2_17895777	+	AT2G43030.1	398.9224251
AT2G43090	AT2G43090	5	2_17920269,2_17920270,2_17920276,2_17920279,2_17920329	+	AT2G43090.1,AT2G43090.2	208.0973748,0.6871808
AT2G43160	EPSIN2	2	2_17953332,2_17953600	+	AT2G43160.2,AT2G43160.3,AT2G43160.1,AT2G43160.4	46.3641995,14.5901856,14.0224007,0
AT2G43710	FAB2	1	2_18122643	+	AT2G43710.1,AT2G43710.2	128.8398222,0.1085437
AT2G44050	COS1	1	2_18225996	+	AT2G44050.1	98.0435044
AT2G44060	AT2G44060	12	2_18228032,2_18228090,2_18228091,2_18228092,2_18228098,2_18228099,2_18228106,2_18228113,2_18228114,2_18228117,2_18228118,2_18228129	+	AT2G44060.1,AT2G44060.2	125.9626764,95.7495546
AT2G44100	GDI1	5	2_18244959,2_18244963,2_18244970,2_18245003,2_18245004	+	AT2G44100.1,AT2G44100.2	141.0646006,0.8276016
AT2G44160	MTHFR2	5	2_18265271,2_18265272,2_18265275,2_18265276,2_18265277	+	AT2G44160.1	107.9240928
AT2G44350	CSY4	14	2_18320604,2_18320609,2_18320620,2_18320627,2_18320664,2_18320678,2_18320679,2_18320680,2_18320681,2_18320682,2_18320683,2_18320684,2_18320685,2_18320698	+	AT2G44350.1,AT2G44350.2	152.1429626,3.8338904
AT2G44620	MTACP1	11	2_18415124,2_18415126,2_18415127,2_18415128,2_18415129,2_18415130,2_18415161,2_18415162,2_18415163,2_18415191,2_18415206	+	AT2G44620.1	186.182723
AT2G44870	AT2G44870	5	2_18504557,2_18504580,2_18504585,2_18504611,2_18504637	+	AT2G44870.1	54.1468298
AT2G44920	AT2G44920	2	2_18526648,2_18526718	+	AT2G44920.2,AT2G44920.1	35.9266511,2.8275607
AT2G45020	AT2G45020	6	2_18569941,2_18569942,2_18569943,2_18569944,2_18569945,2_18569946	+	AT2G45020.1	NA
AT2G45140	PVA12	2	2_18613144,2_18613186	+	AT2G45140.1,AT2G45140.2	57.8324018,0.7141436
AT2G45170	ATG8E	1	2_18625653	+	AT2G45170.1,AT2G45170.2	49.7159663,8.0688374
AT2G45180	AT2G45180	3	2_18626866,2_18626868,2_18626888	+	AT2G45180.1	798.097423
AT2G45740	PEX11D	3	2_18841147,2_18841158,2_18841211	+	AT2G45740.3,AT2G45740.2,AT2G45740.1	14.5118213,10.8724796,2.0935346
AT2G45790	PMM	7	2_18857852,2_18857878,2_18857879,2_18857902,2_18857903,2_18857904,2_18857919	+	AT2G45790.1	118.4608516
AT2G45810	RH6	2	2_18862730,2_18862783	+	AT2G45810.1	36.4763132
AT2G45960	PIP1-2	18	2_18911785,2_18911788,2_18911790,2_18911800,2_18911801,2_18911802,2_18911803,2_18911804,2_18911805,2_18911807,2_18911808,2_18911810,2_18911817,2_18911819,2_18911820,2_18911823,2_18911824,2_18911827	+	AT2G45960.1,AT2G45960.2,AT2G45960.3	1353.4941952,18.3040983,5.5514823
AT2G45990	AT2G45990	3	2_18921083,2_18921100,2_18921101	+	AT2G45990.1,AT2G45990.4,AT2G45990.2,AT2G45990.3	34.8466792,2.0140033,0.2510028,0.053548
AT2G46100	AT2G46100	1	2_18954542	+	AT2G46100.1,AT2G46100.2	29.1887211,0.2810728
AT2G46170	RTNLB5	3	2_18967080,2_18967105,2_18967106	+	AT2G46170.1	54.9144178
AT2G46220	AT2G46220	5	2_18980648,2_18980651,2_18980690,2_18980691,2_18980698	+	AT2G46220.1	46.1396342
AT2G46820	CURT1B	18	2_19245027,2_19245044,2_19245053,2_19245054,2_19245059,2_19245065,2_19245066,2_19245067,2_19245068,2_19245069,2_19245070,2_19245071,2_19245072,2_19245073,2_19245074,2_19245075,2_19245076,2_19245090	+	AT2G46820.1,AT2G46820.2	274.5827907,179.4610302
AT2G46830	CCA1	2	2_19248824,2_19248854	+	AT2G46830.1,AT2G46830.2,AT2G46830.3	15.147501,1.0743496,0.1911777
AT2G47110	RPS27AB	11	2_19345176,2_19345195,2_19345235,2_19345236,2_19345237,2_19345239,2_19345246,2_19345267,2_19345277,2_19345278,2_19345306	+	AT2G47110.1,AT2G47110.2	758.717863,243.14498
AT2G47170	ARF1	22	2_19368616,2_19368617,2_19368622,2_19368642,2_19368643,2_19368644,2_19368645,2_19368646,2_19368647,2_19368649,2_19368651,2_19368652,2_19368653,2_19368654,2_19368655,2_19368656,2_19368659,2_19368663,2_19368665,2_19368666,2_19368670,2_19368719	+	AT2G47170.1	374.520556
AT2G47210	SWC4	2	2_19382299,2_19382321	+	AT2G47210.3,AT2G47210.1,AT2G47210.2	24.7646587,1.3682132,0.0981266
AT2G47320	CYP21-3	1	2_19428890	+	AT2G47320.1	115.0746874
AT2G47380	AT2G47380	9	2_19441949,2_19441997,2_19442021,2_19442043,2_19442047,2_19442060,2_19442061,2_19442073,2_19442074	+	AT2G47380.1,AT2G47380.2	529.1538419,0.9796463
AT2G47400	CP12-1	5	2_19447368,2_19447373,2_19447374,2_19447386,2_19447387	+	AT2G47400.1	624.2790877
AT2G47470	PDIL2-1	7	2_19483695,2_19483780,2_19483783,2_19483784,2_19483796,2_19483797,2_19483798	+	AT2G47470.1,AT2G47470.3,AT2G47470.4,AT2G47470.2	181.4884813,0.0659141,0.0454217,0.0253806
AT2G47510	FUM1	2	2_19502118,2_19502187	+	AT2G47510.1,AT2G47510.3,AT2G47510.2	81.1123338,23.7946806,20.1478489
AT2G47590	PHR2	1	2_19523980	+	AT2G47590.1	99.4883715
AT2G47610	RPL7AA	5	2_19531503,2_19531504,2_19531523,2_19531524,2_19531601	+	AT2G47610.1	534.8574054
AT2G47690	AT2G47690	19	2_19552188,2_19552189,2_19552190,2_19552191,2_19552192,2_19552193,2_19552194,2_19552195,2_19552196,2_19552199,2_19552200,2_19552236,2_19552237,2_19552238,2_19552239,2_19552244,2_19552264,2_19552265,2_19552275	+	AT2G47690.1,AT2G47690.2,AT2G47690.3	193.1645765,2.2479949,0.3835343
AT2G47940	DEGP2	7	2_19618230,2_19618229,2_19618164,2_19618156,2_19618155,2_19618154,2_19618153	-	AT2G47940.1,AT2G47940.2	86.1600201,1.0694898
AT2G47710	AT2G47710	1	2_19554948	-	AT2G47710.1	75.582642
AT2G46540	AT2G46540	11	2_19110631,2_19110627,2_19110626,2_19110625,2_19110624,2_19110623,2_19110610,2_19110609,2_19110565,2_19110564,2_19110514	-	AT2G46540.1	221.3206713
AT2G46390	SDH8	7	2_19042490,2_19042384,2_19042350,2_19042349,2_19042332,2_19042331,2_19042327	-	AT2G46390.1	161.5058997
AT2G46280	TIF3I1	10	2_19003570,2_19003563,2_19003562,2_19003561,2_19003560,2_19003559,2_19003558,2_19003557,2_19003556,2_19003549	-	AT2G46280.1,AT2G46280.2,AT2G46280.3	61.374072,55.7671432,0.9144366
AT2G45820	DBP	4	2_18863112,2_18863013,2_18863000,2_18862999	-	AT2G45820.1	225.7573994
AT2G45670	LPEAT2	2	2_18814955,2_18814916	-	AT2G45670.1,AT2G45670.2	34.594199,5.9823726
AT2G45520	AT2G45520	1	2_18755108	-	AT2G45520.1	71.171576
AT2G45380	AT2G45380	3	2_18699502,2_18699501,2_18699500	-	AT2G45380.1,AT2G45380.2	6.7790434,0.2382261
AT2G45070	SEC61 BETA	14	2_18587241,2_18587195,2_18587150,2_18587123,2_18587118,2_18587117,2_18587116,2_18587115,2_18587114,2_18587108,2_18587107,2_18587105,2_18587100,2_18587085	-	AT2G45070.4,AT2G45070.1,AT2G45070.3,AT2G45070.2	250.3867073,115.5395778,22.6177986,0
AT2G44650	CHL-CPN10	1	2_18419409	-	AT2G44650.1	115.0904494
AT2G44610	RABH1B	5	2_18411615,2_18411586,2_18411554,2_18411530,2_18411529	-	AT2G44610.1	115.6962532
AT2G44120	RPL7C	15	2_18249173,2_18249172,2_18249171,2_18249156,2_18249155,2_18249139,2_18249138,2_18249137,2_18249136,2_18249135,2_18249134,2_18249133,2_18249132,2_18249118,2_18249117	-	AT2G44120.1,AT2G44120.2	243.0155205,4.4064697
AT2G43970	LARP6B	23	2_18205402,2_18205401,2_18205396,2_18205393,2_18205392,2_18205389,2_18205388,2_18205387,2_18205386,2_18205385,2_18205378,2_18205376,2_18205375,2_18205374,2_18205373,2_18205372,2_18205371,2_18205370,2_18205368,2_18205367,2_18205357,2_18205356,2_18205328	-	AT2G43970.1,AT2G43970.2	204.5751558,0.1244318
AT2G43945	AT2G43945	5	2_18197991,2_18197965,2_18197964,2_18197935,2_18197934	-	AT2G43945.1	40.6223287
AT2G43910	HOL1	9	2_18184551,2_18184545,2_18184537,2_18184536,2_18184535,2_18184529,2_18184524,2_18184523,2_18184522	-	AT2G43910.1,AT2G43910.2,AT2G43910.3	217.9382724,109.2269121,2.3424135
AT2G43780	AT2G43780	2	2_18136326,2_18136289	-	AT2G43780.3,AT2G43780.1,AT2G43780.4,AT2G43780.2	44.2702254,6.4310417,0.3598021,0.1546953
AT2G43750	OASB	15	2_18129545,2_18129544,2_18129543,2_18129540,2_18129530,2_18129525,2_18129524,2_18129494,2_18129493,2_18129492,2_18129464,2_18129463,2_18129462,2_18129459,2_18129458	-	AT2G43750.2,AT2G43750.1	178.2114529,5.3100114
AT2G43560	FKBP16-3	3	2_18073928,2_18073927,2_18073926	-	AT2G43560.1,AT2G43560.2	100.2774079,0.350653
AT2G43460	RPL38B	26	2_18046223,2_18046222,2_18046182,2_18046178,2_18046177,2_18046170,2_18046169,2_18046168,2_18046163,2_18046144,2_18046143,2_18046142,2_18046141,2_18046140,2_18046138,2_18046137,2_18046134,2_18046133,2_18046122,2_18046121,2_18046091,2_18046090,2_18046089,2_18046088,2_18046087,2_18046086	-	AT2G43460.1	1155.6495222
AT2G43350	GPX3	4	2_18008701,2_18008700,2_18008699,2_18008691	-	AT2G43350.1,AT2G43350.2	45.9531778,2.2077081
AT2G42880	MPK20	1	2_17840514	-	AT2G42880.1,AT2G42880.2	42.9242182,0.9467541
AT2G42810	PAPP5	2	2_17812231,2_17812158	-	AT2G42810.1,AT2G42810.2,AT2G42810.3,AT2G42810.4,AT2G42810.5	27.5847009,3.0878535,1.5792351,0.4474952,0.0088906
AT2G42600	PPC2	3	2_17734487,2_17734486,2_17734436	-	AT2G42600.2,AT2G42600.1,AT2G42600.3	55.4199374,29.7472183,12.7648584
AT2G42590	GRF9	10	2_17732006,2_17731967,2_17731937,2_17731936,2_17731935,2_17731933,2_17731930,2_17731916,2_17731915,2_17731912	-	AT2G42590.1,AT2G42590.3,AT2G42590.2	171.3592458,0.2151119,0.1066155
AT2G41840	RPS2C	19	2_17460085,2_17460029,2_17459962,2_17459941,2_17459940,2_17459919,2_17459918,2_17459911,2_17459910,2_17459907,2_17459906,2_17459888,2_17459887,2_17459884,2_17459852,2_17459851,2_17459850,2_17459849,2_17459843	-	AT2G41840.1	963.2079513
AT2G41790	PXM16	1	2_17429369	-	AT2G41790.1	24.2632445
AT2G41680	NTRC	5	2_17376289,2_17376277,2_17376274,2_17376251,2_17376224	-	AT2G41680.1	84.6535681
AT2G41475	AT2G41475	4	2_17295205,2_17295204,2_17295203,2_17295202	-	AT2G41475.1	89.3750292
AT2G41420	AT2G41420	6	2_17266669,2_17266668,2_17266656,2_17266639,2_17266638,2_17266629	-	AT2G41420.1	56.275079
AT2G40730	AT2G40730	1	2_16989935	-	AT2G40730.1	27.0798584
AT2G40590	RPS26A	8	2_16945181,2_16945113,2_16945112,2_16945100,2_16945099,2_16945088,2_16945082,2_16945074	-	AT2G40590.1	264.1143375
AT2G40290	AT2G40290	2	2_16828920,2_16828873	-	AT2G40290.1,AT2G40290.2,AT2G40290.3	94.6929141,0.1644244,0.0249632
AT2G40205	RPL41E	10	2_16792320,2_16792298,2_16792275,2_16792274,2_16792266,2_16792265,2_16792262,2_16792256,2_16792253,2_16792252	-	AT2G40205.1	574.4699619
AT2G39990	TIF3F1	5	2_16698218,2_16698217,2_16698216,2_16698215,2_16698183	-	AT2G39990.1	93.7384699
AT2G39960	AT2G39960	8	2_16681611,2_16681606,2_16681588,2_16681587,2_16681560,2_16681542,2_16681541,2_16681535	-	AT2G39960.1	56.1905272
AT2G39800	P5CSA	3	2_16598277,2_16598260,2_16598252	-	AT2G39800.4,AT2G39800.1,AT2G39800.2,AT2G39800.3	57.2745268,7.5535695,0.9942075,0.050277
AT2G39730	RCA	29	2_16570953,2_16570878,2_16570877,2_16570876,2_16570875,2_16570843,2_16570842,2_16570841,2_16570840,2_16570839,2_16570838,2_16570837,2_16570836,2_16570835,2_16570834,2_16570833,2_16570832,2_16570831,2_16570830,2_16570827,2_16570824,2_16570823,2_16570822,2_16570821,2_16570818,2_16570817,2_16570815,2_16570814,2_16570804	-	AT2G39730.1,AT2G39730.2,AT2G39730.3	1133.5134264,1023.5522415,22.7865167
AT2G39390	RPL35B	7	2_16450763,2_16450746,2_16450726,2_16450725,2_16450724,2_16450723,2_16450716	-	AT2G39390.1	529.9123982
AT2G38700	MVD1	3	2_16180785,2_16180783,2_16180753	-	AT2G38700.1	78.1214095
AT2G38270	GRXS16	3	2_16031320,2_16031319,2_16031275	-	AT2G38270.1	80.5648989
AT2G38130	MAK3	1	2_15978596	-	AT2G38130.1,AT2G38130.2	18.1122165,8.3182244
AT2G37660	AT2G37660	1	2_15795399	-	AT2G37660.1	283.26619
AT2G37550	AGD7	4	2_15755254,2_15755238,2_15755158,2_15755140	-	AT2G37550.1,AT2G37550.2	63.6469323,2.5088348
AT2G37340	RS2Z33	7	2_15670283,2_15670282,2_15670261,2_15670251,2_15670219,2_15670218,2_15670203	-	AT2G37340.1,AT2G37340.3,AT2G37340.2	102.1727744,4.1819569,0.4026118
AT2G37270	RPS5A	11	2_15647819,2_15647814,2_15647795,2_15647794,2_15647789,2_15647781,2_15647780,2_15647779,2_15647778,2_15647766,2_15647765	-	AT2G37270.1,AT2G37270.2	288.5172739,18.0447739
AT2G37220	CP29B	13	2_15634773,2_15634733,2_15634732,2_15634731,2_15634730,2_15634729,2_15634728,2_15634726,2_15634725,2_15634724,2_15634714,2_15634684,2_15634639	-	AT2G37220.1	615.1461873
AT2G37200	AT2G37200	1	2_15621990	-	AT2G37200.1,AT2G37200.2	46.8918598,0.2967763
AT2G37190	RPL12A	5	2_15619503,2_15619490,2_15619489,2_15619488,2_15619487	-	AT2G37190.1	502.0354114
AT2G37120	S1FA2	9	2_15594189,2_15594157,2_15594156,2_15594155,2_15594154,2_15594153,2_15594152,2_15594151,2_15594144	-	AT2G37120.1	85.6819369
AT2G36930	AT2G36930	5	2_15509986,2_15509956,2_15509944,2_15509931,2_15509930	-	AT2G36930.1	97.8714747
AT2G36850	CALS10	2	2_15454816,2_15454815	-	AT2G36850.1	19.6763245
AT2G36835	AT2G36835	11	2_15449749,2_15449707,2_15449686,2_15449685,2_15449684,2_15449683,2_15449682,2_15449672,2_15449671,2_15449647,2_15449646	-	AT2G36835.1	47.7743329
AT2G36620	RPL24A	13	2_15350522,2_15350468,2_15350467,2_15350466,2_15350465,2_15350464,2_15350463,2_15350462,2_15350461,2_15350460,2_15350459,2_15350458,2_15350433	-	AT2G36620.1	436.6893318
AT2G36530	ENO2	24	2_15320969,2_15320957,2_15320954,2_15320953,2_15320952,2_15320951,2_15320948,2_15320947,2_15320926,2_15320923,2_15320922,2_15320921,2_15320920,2_15320919,2_15320918,2_15320917,2_15320908,2_15320904,2_15320903,2_15320902,2_15320888,2_15320887,2_15320886,2_15320865	-	AT2G36530.1,AT2G36530.2	933.6570327,0.0415093
AT2G36250	FTSZ2-1	2	2_15197458,2_15197457	-	AT2G36250.1,AT2G36250.3,AT2G36250.4,AT2G36250.2	41.0231671,2.0638845,0.8149939,0.4086203
AT2G36060	UEV1C	7	2_15142950,2_15142913,2_15142874,2_15142871,2_15142865,2_15142846,2_15142816	-	AT2G36060.1,AT2G36060.2,AT2G36060.3	47.1799348,32.4522484,1.0069714
AT2G35680	DSP8	2	2_14996817,2_14996774	-	AT2G35680.1	49.7501235
AT2G35490	PAP3	7	2_14912279,2_14912270,2_14912269,2_14912268,2_14912264,2_14912263,2_14912262	-	AT2G35490.1	75.7076715
AT2G34720	NFYA4	1	2_14649864	-	AT2G34720.1,AT2G34720.2,AT2G34720.3	21.590987,0.6503129,0.1190346
AT2G34520	RPS14	1	2_14547954	-	AT2G34520.1	80.8378561
AT2G34480	RPL18AB	28	2_14532870,2_14532847,2_14532845,2_14532829,2_14532825,2_14532824,2_14532809,2_14532808,2_14532807,2_14532806,2_14532794,2_14532778,2_14532777,2_14532776,2_14532775,2_14532774,2_14532772,2_14532769,2_14532767,2_14532766,2_14532765,2_14532764,2_14532763,2_14532760,2_14532759,2_14532758,2_14532757,2_14532756	-	AT2G34480.1,AT2G34480.2	1273.0328768,0.4015523
AT2G34470	UREG	2	2_14530806,2_14530787	-	AT2G34470.1,AT2G34470.2	85.9311083,2.7189125
AT2G34420	LHB1B2	5	2_14522667,2_14522661,2_14522660,2_14522628,2_14522616	-	AT2G34420.1	8012.7393374
AT2G34310	AT2G34310	2	2_14477871,2_14477819	-	AT2G34310.3,AT2G34310.6,AT2G34310.2,AT2G34310.1,AT2G34310.5,AT2G34310.4	19.7218765,1.0050487,0.957452,0.3852658,0.2055224,0.0582911
AT2G34040	AT2G34040	3	2_14377873,2_14377819,2_14377814	-	AT2G34040.1,AT2G34040.3	36.8386214,0.2747356
AT2G33800	RPS5	10	2_14300867,2_14300851,2_14300849,2_14300848,2_14300847,2_14300846,2_14300845,2_14300844,2_14300843,2_14300842	-	AT2G33800.1	308.1516118
AT2G33630	AT2G33630	2	2_14236917,2_14236895	-	AT2G33630.1	51.3215317
AT2G33470	GLTP1	11	2_14176589,2_14176523,2_14176522,2_14176521,2_14176481,2_14176480,2_14176464,2_14176463,2_14176462,2_14176461,2_14176452	-	AT2G33470.2,AT2G33470.1	49.5873701,31.1429683
AT2G33370	RPL23C	15	2_14143688,2_14143646,2_14143645,2_14143644,2_14143643,2_14143642,2_14143641,2_14143640,2_14143639,2_14143625,2_14143624,2_14143613,2_14143604,2_14143603,2_14143602	-	AT2G33370.1,AT2G33370.2	236.284408,0.2517751
AT2G33340	PRP19B	9	2_14126362,2_14126360,2_14126346,2_14126345,2_14126329,2_14126321,2_14126320,2_14126317,2_14126316	-	AT2G33340.1,AT2G33340.2,AT2G33340.3	64.6433277,7.1183454,0
AT2G33210	HSP60-2	3	2_14074970,2_14074969,2_14074968	-	AT2G33210.1,AT2G33210.2	58.2020824,0.0189287
AT2G33150	PED1	13	2_14047722,2_14047663,2_14047652,2_14047623,2_14047622,2_14047618,2_14047617,2_14047616,2_14047615,2_14047614,2_14047611,2_14047610,2_14047609	-	AT2G33150.1	178.4961284
AT2G33120	VAMP722	10	2_14043667,2_14043611,2_14043610,2_14043599,2_14043598,2_14043555,2_14043554,2_14043538,2_14043537,2_14043534	-	AT2G33120.1,AT2G33120.2,AT2G33120.3	74.798534,0.2842121,0.0139385
AT2G33040	ATPC	21	2_14018939,2_14018905,2_14018884,2_14018858,2_14018857,2_14018839,2_14018838,2_14018837,2_14018836,2_14018830,2_14018829,2_14018823,2_14018822,2_14018820,2_14018819,2_14018818,2_14018817,2_14018782,2_14018781,2_14018780,2_14018760	-	AT2G33040.1	460.7566554
AT2G32920	PDIL2-3	5	2_13962388,2_13962387,2_13962384,2_13962383,2_13962373	-	AT2G32920.1	65.7781286
AT2G32720	CYTB5-B	3	2_13876878,2_13876869,2_13876797	-	AT2G32720.1,AT2G32720.2	35.1741207,2.9443161
AT2G32600	AT2G32600	2	2_13833612,2_13833611	-	AT2G32600.1	41.3939305
AT2G32060	RPS12C	14	2_13639205,2_13639204,2_13639140,2_13639138,2_13639137,2_13639136,2_13639135,2_13639133,2_13639119,2_13639095,2_13639094,2_13639093,2_13639067,2_13639066	-	AT2G32060.1,AT2G32060.2,AT2G32060.3	398.8093962,68.101842,0.2994019
AT2G31570	GPX2	8	2_13438105,2_13438079,2_13438078,2_13438077,2_13438057,2_13438052,2_13438045,2_13438039	-	AT2G31570.1	325.7752944
AT2G31040	AT2G31040	3	2_13209093,2_13209063,2_13209062	-	AT2G31040.1	26.5247367
AT2G30980	ASK6	3	2_13182111,2_13182106,2_13182105	-	AT2G30980.1	61.7219022
AT2G30570	PSBW	21	2_13019250,2_13019249,2_13019248,2_13019243,2_13019242,2_13019241,2_13019239,2_13019238,2_13019237,2_13019236,2_13019215,2_13019214,2_13019213,2_13019204,2_13019203,2_13019202,2_13019201,2_13019200,2_13019198,2_13019197,2_13019191	-	AT2G30570.1	1663.2427066
AT2G30200	AT2G30200	3	2_12883102,2_12883092,2_12883030	-	AT2G30200.1,AT2G30200.2	59.9581205,0.5412699
AT2G30110	UBA1	10	2_12852549,2_12852515,2_12852514,2_12852513,2_12852455,2_12852454,2_12852453,2_12852452,2_12852451,2_12852450	-	AT2G30110.1	72.872413
AT2G29960	CYP19-4	3	2_12769083,2_12769082,2_12769081	-	AT2G29960.3,AT2G29960.1,AT2G29960.2	93.2187502,0.3435217,0.210552
AT2G29650	ANTR1	1	2_12673443	-	AT2G29650.1,AT2G29650.2,AT2G29650.3,AT2G29650.4	30.0374496,2.6963144,2.2915358,0.8892414
AT2G29530	TIM10	11	2_12640907,2_12640894,2_12640882,2_12640881,2_12640867,2_12640860,2_12640859,2_12640858,2_12640857,2_12640856,2_12640853	-	AT2G29530.2,AT2G29530.1,AT2G29530.3	231.0284868,2.0847627,0
AT2G29400	TOPP1	4	2_12613169,2_12613143,2_12613142,2_12613138	-	AT2G29400.1	79.7220177
AT2G28910	CXIP4	4	2_12415899,2_12415871,2_12415870,2_12415869	-	AT2G28910.1,AT2G28910.2,AT2G28910.3	152.0625401,0.3512093,0.1834766
AT2G28800	ALB3	6	2_12356589,2_12356588,2_12356586,2_12356585,2_12356584,2_12356498	-	AT2G28800.1,AT2G28800.4,AT2G28800.3	83.71767,48.9555012,16.9397413
AT2G28390	AT2G28390	2	2_12139764,2_12139763	-	AT2G28390.1	20.5298203
AT2G27960	CKS1	3	2_11910839,2_11910831,2_11910778	-	AT2G27960.1	52.2603955
AT2G27860	AXS1	10	2_11864588,2_11864582,2_11864581,2_11864580,2_11864579,2_11864575,2_11864574,2_11864505,2_11864486,2_11864457	-	AT2G27860.1	187.2774642
AT2G27730	AT2G27730	18	2_11820102,2_11820003,2_11819986,2_11819904,2_11819903,2_11819901,2_11819900,2_11819899,2_11819898,2_11819880,2_11819874,2_11819872,2_11819871,2_11819868,2_11819867,2_11819866,2_11819863,2_11819848	-	AT2G27730.1,AT2G27730.4,AT2G27730.3,AT2G27730.2	263.4386162,3.4065781,0.7647145,0.2250744
AT2G27680	AT2G27680	10	2_11803967,2_11803960,2_11803959,2_11803944,2_11803930,2_11803929,2_11803924,2_11803923,2_11803922,2_11803895	-	AT2G27680.1	81.1277014
AT2G27530	RPL10AB	15	2_11763435,2_11763432,2_11763413,2_11763395,2_11763391,2_11763390,2_11763389,2_11763388,2_11763372,2_11763361,2_11763341,2_11763340,2_11763339,2_11763336,2_11763334	-	AT2G27530.1,AT2G27530.2	466.7068086,78.3007766
AT2G27290	AT2G27290	2	2_11678529,2_11678517	-	AT2G27290.1	38.8431724
AT2G27190	PAP12	4	2_11621324,2_11621313,2_11621303,2_11621249	-	AT2G27190.1	32.1493674
AT2G27020	PAG1	3	2_11528463,2_11528413,2_11528388	-	AT2G27020.1,AT2G27020.2	190.1257702,0.0548252
AT2G26990	CSN2	8	2_11519656,2_11519599,2_11519598,2_11519597,2_11519591,2_11519590,2_11519589,2_11519588	-	AT2G26990.1	33.610847
AT2G26900	BASS2	4	2_11475108,2_11475079,2_11475078,2_11475017	-	AT2G26900.1	115.4064299
AT2G26250	FDH	1	2_11170617	-	AT2G26250.1	96.9082381
AT2G26240	FAX7	2	2_11167387,2_11167370	-	AT2G26240.1	67.1741749
AT2G26080	GLDP2	8	2_11109202,2_11109201,2_11109198,2_11109197,2_11109196,2_11109195,2_11109184,2_11109128	-	AT2G26080.1	115.4655551
AT2G25670	AT2G25670	1	2_10928969	-	AT2G25670.1,AT2G25670.2	48.9206328,37.9680328
AT2G25610	VHA-c''2	3	2_10901574,2_10901563,2_10901520	-	AT2G25610.1,AT2G25610.2	74.8330428,0.2178422
AT2G25310	AT2G25310	4	2_10777267,2_10777266,2_10777265,2_10777264	-	AT2G25310.1	39.6936272
AT2G24270	ALDH11A3	18	2_10327318,2_10327317,2_10327316,2_10327315,2_10327314,2_10327312,2_10327310,2_10327309,2_10327267,2_10327266,2_10327259,2_10327258,2_10327248,2_10327222,2_10327218,2_10327217,2_10327216,2_10327189	-	AT2G24270.1,AT2G24270.3,AT2G24270.2	55.7384926,25.1088521,0.2676768
AT2G24200	PM25	5	2_10286961,2_10286923,2_10286903,2_10286902,2_10286901	-	AT2G24200.2,AT2G24200.1,AT2G24200.3	169.4467567,59.6480496,0.0074073
AT2G24020	AT2G24020	2	2_10217792,2_10217791	-	AT2G24020.1,AT2G24020.2	107.7009816,0.3704498
AT2G23810	TET8	3	2_10135756,2_10135740,2_10135725	-	AT2G23810.1	81.8157545
AT2G23090	AT2G23090	12	2_9830343,2_9830286,2_9829567,2_9829566,2_9829565,2_9829564,2_9829558,2_9829555,2_9829554,2_9829548,2_9829546,2_9829483	-	AT2G23090.1	727.592701
AT2G23070	AT2G23070	2	2_9824034,2_9824023	-	AT2G23070.1	88.239111
AT2G22040	AT2G22040	2	2_9375789,2_9375788	-	AT2G22040.1	0
AT2G21870	MGP1	23	2_9320474,2_9320342,2_9320341,2_9320325,2_9320324,2_9320323,2_9320301,2_9320300,2_9320299,2_9320298,2_9320297,2_9320296,2_9320295,2_9320284,2_9320283,2_9320260,2_9320259,2_9320258,2_9320257,2_9320256,2_9320255,2_9320249,2_9320242	-	AT2G21870.1,AT2G21870.2	526.9214019,0.0182453
AT2G21330	FBA1	12	2_9128397,2_9128396,2_9128395,2_9128394,2_9128393,2_9128356,2_9128355,2_9128354,2_9128353,2_9128342,2_9128267,2_9128261	-	AT2G21330.1,AT2G21330.3,AT2G21330.2	199.7620487,63.5536677,3.8515261
AT2G21170	TIM	23	2_9070958,2_9070951,2_9070948,2_9070947,2_9070941,2_9070940,2_9070939,2_9070938,2_9070937,2_9070897,2_9070855,2_9070844,2_9070843,2_9070827,2_9070826,2_9070825,2_9070823,2_9070822,2_9070821,2_9070820,2_9070819,2_9070818,2_9070815	-	AT2G21170.1,AT2G21170.2,AT2G21170.3	293.7133161,3.838958,0.0861816
AT2G20630	PPC3-1.2	10	2_8897807,2_8897797,2_8897793,2_8897792,2_8897764,2_8897757,2_8897753,2_8897735,2_8897734,2_8897722	-	AT2G20630.1	93.5925643
AT2G20280	AT2G20280	2	2_8739940,2_8739939	-	AT2G20280.1	38.111297
AT2G20120	COV1	2	2_8687412,2_8687411	-	AT2G20120.2,AT2G20120.1	38.9436018,2.855513
AT2G19830	VPS32.1	2	2_8557917,2_8557832	-	AT2G19830.2,AT2G19830.1	63.934242,1.2042388
AT2G19760	PRO1	9	2_8516977,2_8516976,2_8516975,2_8516974,2_8516973,2_8516972,2_8516959,2_8516956,2_8516917	-	AT2G19760.1	351.5773671
AT2G18710	SCY1	2	2_8112151,2_8112150	-	AT2G18710.1	46.9099796
AT2G18290	APC10	2	2_7948416,2_7948389	-	AT2G18290.1	13.8412236
AT2G18230	PPA2	2	2_7932031,2_7932030	-	AT2G18230.1	25.5887585
AT2G17560	HMGB4	6	2_7642439,2_7642380,2_7642375,2_7642374,2_7642313,2_7642281	-	AT2G17560.1,AT2G17560.2,AT2G17560.3	139.8136926,29.3009558,14.109615
AT2G17340	AT2G17340	2	2_7541569,2_7541556	-	AT2G17340.1	27.4019069
AT2G17200	DSK2B	2	2_7482025,2_7482019	-	AT2G17200.1	72.1065437
AT2G17190	DSK2A	1	2_7478082	-	AT2G17190.1	46.8846903
AT2G16510	VHA-C3	9	2_7159787,2_7159773,2_7159753,2_7159751,2_7159750,2_7159749,2_7159738,2_7159737,2_7159720	-	AT2G16510.1	98.3631411
AT2G15370	FUT5	6	2_6700480,2_6700479,2_6700478,2_6700477,2_6700476,2_6700473	-	AT2G15370.1	5.7902724
AT2G15290	TIC21	5	2_6642443,2_6642406,2_6642394,2_6642393,2_6642392	-	AT2G15290.1	112.6052341
AT2G15240	AT2G15240	4	2_6615886,2_6615885,2_6615882,2_6615802	-	AT2G15240.1	22.5769253
AT2G14910	AT2G14910	8	2_6406757,2_6406756,2_6406736,2_6406703,2_6406699,2_6406698,2_6406696,2_6406695	-	AT2G14910.1,AT2G14910.2	49.071955,0.1783119
AT2G14285	AT2G14285	3	2_6052512,2_6052511,2_6052510	-	AT2G14285.1	22.3206135
AT2G13360	AGT1	11	2_5539340,2_5539316,2_5539315,2_5539314,2_5539313,2_5539312,2_5539307,2_5539305,2_5539304,2_5539294,2_5539291	-	AT2G13360.2,AT2G13360.3,AT2G13360.1	312.7055595,104.6358842,0.1694179
AT2G11910	AT2G11910	4	2_4805795,2_4805743,2_4805742,2_4805702	-	AT2G11910.1,AT2G11910.2	66.0755772,56.2499955
AT2G06520	PSBX	6	2_2587843,2_2587808,2_2587807,2_2587806,2_2587761,2_2587735	-	AT2G06520.1	1993.3595321
AT2G05620	PGR5	5	2_2081122,2_2081119,2_2081093,2_2081092,2_2081091	-	AT2G05620.1,AT2G05620.2	81.3868942,0.0363924
AT2G05310	AT2G05310	3	2_1933345,2_1933330,2_1933307	-	AT2G05310.1,AT2G05310.2	45.268465,5.3695942
AT2G05220	RPS17B	8	2_1894701,2_1894679,2_1894678,2_1894671,2_1894670,2_1894628,2_1894620,2_1894618	-	AT2G05220.1,AT2G05220.2	526.9430226,0.236035
AT2G05070	LHCB2.2	6	2_1799396,2_1799395,2_1799394,2_1799388,2_1799382,2_1799371	-	AT2G05070.1	2388.7286878
AT2G04842	EMB2761	2	2_1698462,2_1698461	-	AT2G04842.2,AT2G04842.1	29.5045633,1.3080455
AT2G04630	NRPB6B	2	2_1619110,2_1619080	-	AT2G04630.1	52.6490779
AT2G04520	AT2G04520	6	2_1574788,2_1574787,2_1574769,2_1574761,2_1574760,2_1574743	-	AT2G04520.1	138.7193824
AT2G04410	AT2G04410	6	2_1533858,2_1533807,2_1533806,2_1533799,2_1533793,2_1533792	-	AT2G04410.1	279.6258769
AT2G03640	AT2G03640	5	2_1104446,2_1104407,2_1104402,2_1104401,2_1104400	-	AT2G03640.1,AT2G03640.2,AT2G03640.4	27.2280607,0.6952895,0.0917575
AT2G01720	OST1B	3	2_317166,2_317137,2_317127	-	AT2G01720.1	84.0608804
AT2G01690	VAC14	1	2_308831	-	AT2G01690.1,AT2G01690.2	18.775086,1.1268521
AT2G01470	STL2P	2	2_212128,2_212086	-	AT2G01470.1	67.0664738
AT2G01350	QPT	8	2_165291,2_165254,2_165226,2_165194,2_165193,2_165192,2_165191,2_165190	-	AT2G01350.1,AT2G01350.2,AT2G01350.4,AT2G01350.3	47.3220158,1.0485511,0.4931207,0.1618433
AT2G01250	RPL7B	15	2_132926,2_132922,2_132905,2_132904,2_132903,2_132902,2_132901,2_132900,2_132899,2_132881,2_132875,2_132874,2_132873,2_132872,2_132867	-	AT2G01250.1,AT2G01250.2	767.5089312,0.0335312
AT2G01140	FBA3	8	2_94938,2_94937,2_94934,2_94933,2_94929,2_94916,2_94915,2_94914	-	AT2G01140.1	340.8393615
AT2G01110	TATC	2	2_83726,2_83725	-	AT2G01110.1	60.3752586
AT3G01280	VDAC1	6	3_87716,3_87728,3_87739,3_87740,3_87741,3_87742	+	AT3G01280.1	268.1593983
AT3G01480	CYP38	1	3_190725	+	AT3G01480.1,AT3G01480.2	99.9387294,1.8222293
AT3G01520	AT3G01520	4	3_210011,3_210041,3_210052,3_210096	+	AT3G01520.1	116.3260428
AT3G01690	AT3G01690	8	3_258424,3_258434,3_258442,3_258443,3_258446,3_258447,3_258448,3_258454	+	AT3G01690.1	58.7064765
AT3G02090	MPPBETA	15	3_368629,3_368630,3_368634,3_368638,3_368644,3_368650,3_368651,3_368684,3_368685,3_368734,3_368736,3_368743,3_368753,3_368773,3_368780	+	AT3G02090.1,AT3G02090.2	302.092117,0.0791797
AT3G02200	AT3G02200	2	3_409039,3_409046	+	AT3G02200.2,AT3G02200.1	73.8025901,0.015335
AT3G02350	GAUT9	3	3_481367,3_481368,3_481423	+	AT3G02350.1	50.1509986
AT3G02360	AT3G02360	2	3_484077,3_484091	+	AT3G02360.1,AT3G02360.2	180.6091081,1.3099006
AT3G02470	SAMDC1	4	3_511363,3_511481,3_511482,3_511483	+	AT3G02470.3,AT3G02470.1,AT3G02470.4	918.1273255,40.6774145,3.497356
AT3G02560	RPS7B	13	3_543190,3_543191,3_543201,3_543215,3_543218,3_543257,3_543263,3_543264,3_543265,3_543279,3_543280,3_543281,3_543282	+	AT3G02560.1,AT3G02560.3,AT3G02560.2	338.2044412,1.4120918,0.4603444
AT3G02720	DJ1D	1	3_588261	+	AT3G02720.1	47.9838466
AT3G02900	AT3G02900	1	3_647545	+	AT3G02900.1,AT3G02900.2	67.5813334,0.1904722
AT3G03160	AT3G03160	1	3_730416	+	AT3G03160.1	102.3527722
AT3G03380	DEGP7	1	3_808409	+	AT3G03380.1,AT3G03380.2	28.2653072,8.3638609
AT3G03960	CCT8	2	3_1027753,3_1027754	+	AT3G03960.1	111.913522
AT3G04120	GAPC1	24	3_1083186,3_1083187,3_1083237,3_1083238,3_1083239,3_1083240,3_1083246,3_1083253,3_1083254,3_1083255,3_1083256,3_1083285,3_1083300,3_1083301,3_1083302,3_1083303,3_1083318,3_1083319,3_1083320,3_1083328,3_1083329,3_1083334,3_1083335,3_1083341	+	AT3G04120.1	1238.2164029
AT3G04400	RPL23C	24	3_1167783,3_1167806,3_1167810,3_1167855,3_1167856,3_1168329,3_1168371,3_1168372,3_1168382,3_1168384,3_1168394,3_1168395,3_1168400,3_1168412,3_1168413,3_1168414,3_1168415,3_1168416,3_1168417,3_1168418,3_1168419,3_1168420,3_1168421,3_1168523	+	AT3G04400.1,AT3G04400.2	1057.5462373,833.6883649
AT3G04600	AT3G04600	2	3_1246102,3_1246103	+	AT3G04600.1,AT3G04600.3,AT3G04600.2	47.7843048,6.6230995,0.0334594
AT3G04830	AT3G04830	5	3_1329235,3_1329245,3_1329278,3_1329279,3_1329280	+	AT3G04830.1,AT3G04830.2	56.2250329,0.0079882
AT3G04840	RPS3AA	13	3_1331453,3_1331454,3_1331455,3_1331456,3_1331472,3_1331528,3_1331532,3_1331533,3_1331534,3_1331549,3_1331550,3_1331551,3_1331552	+	AT3G04840.1	905.2640717
AT3G04870	ZDS1	8	3_1346224,3_1346235,3_1346236,3_1346309,3_1346312,3_1346313,3_1346318,3_1346347	+	AT3G04870.1,AT3G04870.2	28.9503184,10.905674
AT3G04920	RPS24A	12	3_1362142,3_1362143,3_1362146,3_1362178,3_1362202,3_1362212,3_1362213,3_1362218,3_1362219,3_1362223,3_1362224,3_1362225	+	AT3G04920.1,AT3G04920.2	447.3975156,0.3767787
AT3G05420	ACBP4	3	3_1567160,3_1567206,3_1567289	+	AT3G05420.1,AT3G05420.2	30.7668418,20.4507497
AT3G05530	RPT5A	11	3_1606046,3_1606059,3_1606060,3_1606061,3_1606076,3_1606077,3_1606078,3_1606085,3_1606089,3_1606090,3_1606103	+	AT3G05530.1	125.8597504
AT3G05545	AT3G05545	1	3_1612300	+	AT3G05545.1	43.9636403
AT3G05560	RPL22B	12	3_1615262,3_1615263,3_1615282,3_1615283,3_1615284,3_1615286,3_1615287,3_1615352,3_1615354,3_1615355,3_1615361,3_1615370	+	AT3G05560.1,AT3G05560.3,AT3G05560.2	664.1409395,5.9662082,1.4907613
AT3G05590	RPL18B	24	3_1622763,3_1622848,3_1622859,3_1622865,3_1622866,3_1622867,3_1622870,3_1622871,3_1622872,3_1622873,3_1622875,3_1622876,3_1622877,3_1622878,3_1622879,3_1622910,3_1622911,3_1622912,3_1622925,3_1622940,3_1622965,3_1622966,3_1622967,3_1622970	+	AT3G05590.1,AT3G05590.2,AT3G05590.3	1204.0281131,1.0068533,0.1653418
AT3G05835	AT3G05835	3	3_1738823,3_1738826,3_1738827	+	AT3G05835.1	NA
AT3G05840	ASK3	1	3_1743062	+	AT3G05840.1,AT3G05840.2	47.5114961,19.1898423
AT3G06125	AT3G06125	1	3_1849216	+	AT3G06125.2,AT3G06125.3	NA
AT3G06510	SFR2	2	3_2019580,3_2019642	+	AT3G06510.1,AT3G06510.2	26.8833631,8.7532482
AT3G06860	MFP2	2	3_2166200,3_2166201	+	AT3G06860.1	64.0434354
AT3G07110	RPL13AA	10	3_2253368,3_2253369,3_2253374,3_2253403,3_2253404,3_2253416,3_2253417,3_2253418,3_2253430,3_2253431	+	AT3G07110.1,AT3G07110.2	483.6093555,0.1427321
AT3G07170	AT3G07170	1	3_2282240	+	AT3G07170.1	58.4902569
AT3G07230	AT3G07230	2	3_2300231,3_2300234	+	AT3G07230.1	162.7857909
AT3G07480	AT3G07480	6	3_2389636,3_2389638,3_2389664,3_2389665,3_2389666,3_2389674	+	AT3G07480.1	294.0897611
AT3G07680	AT3G07680	6	3_2456666,3_2456698,3_2456707,3_2456713,3_2456714,3_2456725	+	AT3G07680.1	98.1156596
AT3G07880	GDI1	4	3_2515658,3_2515660,3_2515670,3_2515742	+	AT3G07880.1	68.0795138
AT3G08520	RPL41E	17	3_2586227,3_2586230,3_2586283,3_2586293,3_2586300,3_2586301,3_2586311,3_2586317,3_2586318,3_2586319,3_2586320,3_2586321,3_2586330,3_2586334,3_2586335,3_2586336,3_2586344	+	AT3G08520.1	2107.2452789
AT3G08640	AT3G08640	1	3_2625277	+	AT3G08640.1	79.0991156
AT3G08690	UBC11	1	3_2642551	+	AT3G08690.1,AT3G08690.2	33.119252,2.0345439
AT3G08930	AT3G08930	3	3_2717244,3_2717247,3_2717248	+	AT3G08930.1	47.5496936
AT3G09500	RPL35A	23	3_2917898,3_2917928,3_2917945,3_2917955,3_2917964,3_2917965,3_2917966,3_2917970,3_2917972,3_2917973,3_2917974,3_2917980,3_2917984,3_2917986,3_2917987,3_2917988,3_2917989,3_2917996,3_2917997,3_2917998,3_2918004,3_2918005,3_2918006	+	AT3G09500.1	1779.8515215
AT3G09630	RPL4A	11	3_2955514,3_2955520,3_2955521,3_2955522,3_2955532,3_2955540,3_2955541,3_2955542,3_2955543,3_2955545,3_2955546	+	AT3G09630.1,AT3G09630.2	528.9472218,0.091927
AT3G09740	SYP71	3	3_2991462,3_2991465,3_2991466	+	AT3G09740.1	83.1932462
AT3G09810	IDH6	8	3_3011151,3_3011152,3_3011260,3_3011262,3_3011263,3_3011283,3_3011290,3_3011328	+	AT3G09810.1	47.0151352
AT3G09820	ADK1	7	3_3014673,3_3014774,3_3014775,3_3014776,3_3014777,3_3014787,3_3014788	+	AT3G09820.1,AT3G09820.2	342.3964055,0.207133
AT3G09840	CDC48A	12	3_3022885,3_3022886,3_3022887,3_3022893,3_3022894,3_3022907,3_3022908,3_3022927,3_3022928,3_3022929,3_3022930,3_3022931	+	AT3G09840.1	259.2823267
AT3G09860	AT3G09860	9	3_3027123,3_3027124,3_3027125,3_3027126,3_3027151,3_3027154,3_3027155,3_3027167,3_3027168	+	AT3G09860.1	279.6086516
AT3G09900	RABE1E	3	3_3036458,3_3036490,3_3036506	+	AT3G09900.1	26.4416795
AT3G10035	AT3G10035	5	3_3096239,3_3096247,3_3096248,3_3096249,3_3096250	+	AT3G10035.1	NA
AT3G10860	AT3G10860	18	3_3400562,3_3400567,3_3400569,3_3400570,3_3400571,3_3400572,3_3400580,3_3400581,3_3400582,3_3400585,3_3400586,3_3400596,3_3400606,3_3400607,3_3400608,3_3400609,3_3400610,3_3400622	+	AT3G10860.1,AT3G10860.2	700.7435393,0.1544892
AT3G10920	MSD1	7	3_3419585,3_3419675,3_3419692,3_3419702,3_3419703,3_3419708,3_3419709	+	AT3G10920.1,AT3G10920.2	294.0719612,0
AT3G11120	RPL41E	15	3_3481359,3_3481370,3_3481371,3_3481372,3_3481373,3_3481374,3_3481375,3_3481376,3_3481379,3_3481380,3_3481381,3_3481393,3_3481394,3_3481395,3_3481396	+	AT3G11120.1	783.0618254
AT3G11170	FAD7	2	3_3502196,3_3502270	+	AT3G11170.1	66.3020699
AT3G11400	EIF3G1	1	3_3580456	+	AT3G11400.1,AT3G11400.2	164.0346062,0.0701961
AT3G11630	BAS1	29	3_3673990,3_3673991,3_3673992,3_3673993,3_3673994,3_3673995,3_3673996,3_3673998,3_3674009,3_3674010,3_3674011,3_3674014,3_3674017,3_3674018,3_3674019,3_3674020,3_3674024,3_3674027,3_3674028,3_3674029,3_3674030,3_3674031,3_3674032,3_3674033,3_3674034,3_3674044,3_3674045,3_3674046,3_3674047	+	AT3G11630.1	531.9494349
AT3G11800	AT3G11800	5	3_3727631,3_3727632,3_3727633,3_3727671,3_3727672	+	AT3G11800.1	86.5252233
AT3G11830	CCT7	3	3_3736270,3_3736271,3_3736287	+	AT3G11830.1,AT3G11830.2	109.1037816,2.2239984
AT3G12290	FOLD2	5	3_3921305,3_3921331,3_3921370,3_3921376,3_3921391	+	AT3G12290.1	143.0752314
AT3G12390	AT3G12390	6	3_3943632,3_3943633,3_3943657,3_3943709,3_3943753,3_3943754	+	AT3G12390.1	241.0065545
AT3G12760	AT3G12760	4	3_4056883,3_4056884,3_4056885,3_4056936	+	AT3G12760.1	29.9536718
AT3G13200	EMB2769	10	3_4243974,3_4243982,3_4244033,3_4244034,3_4244038,3_4244039,3_4244040,3_4244048,3_4244049,3_4244073	+	AT3G13200.1	112.660603
AT3G13300	VCS	4	3_4310134,3_4310135,3_4310136,3_4310137	+	AT3G13300.1,AT3G13300.2,AT3G13300.3	17.5211291,12.796053,0.2385299
AT3G13580	RPL7D	8	3_4435156,3_4435165,3_4435180,3_4435198,3_4435232,3_4435233,3_4435234,3_4435240	+	AT3G13580.1,AT3G13580.2,AT3G13580.9,AT3G13580.3,AT3G13580.7,AT3G13580.8,AT3G13580.6,AT3G13580.5,AT3G13580.4	157.0695807,1.6687376,0.5885446,0.2992973,0.2639487,0.1939804,0.055401,0.0335003,0.0066667
AT3G13740	AT3G13740	2	3_4506165,3_4506166	+	AT3G13740.1,AT3G13740.3,AT3G13740.6,AT3G13740.4,AT3G13740.2,AT3G13740.5	22.8406664,1.1491979,0.7201177,0.3853832,0.0311015,0
AT3G13750	BGAL1	3	3_4516194,3_4516196,3_4516203	+	AT3G13750.1	85.0554101
AT3G13857	AT3G13857	4	3_4561100,3_4561101,3_4561102,3_4561103	+	AT3G13857.1	3.5498959
AT3G13882	AT3G13882	2	3_4576010,3_4576011	+	AT3G13882.1,AT3G13882.2	150.476471,0
AT3G13930	AT3G13930	6	3_4600274,3_4600290,3_4600297,3_4600298,3_4600299,3_4600351	+	AT3G13930.1	116.1242324
AT3G14010	CID4	2	3_4640840,3_4640841	+	AT3G14010.2,AT3G14010.3,AT3G14010.1,AT3G14010.5	7.9560664,4.7932535,2.1237556,0.0578407
AT3G14100	UBP1C	7	3_4676027,3_4676098,3_4676099,3_4676100,3_4676110,3_4676113,3_4676114	+	AT3G14100.1	49.2825913
AT3G14290	PAE2	1	3_4766448	+	AT3G14290.1	70.5178703
AT3G14415	GLO2	14	3_4820816,3_4820817,3_4820852,3_4820854,3_4820855,3_4820856,3_4820901,3_4820902,3_4820910,3_4820921,3_4820922,3_4820927,3_4820959,3_4820960	+	AT3G14415.1,AT3G14415.2,AT3G14415.3	225.229806,0.65643,0.3083354
AT3G14420	GLO1	11	3_4823987,3_4823989,3_4824014,3_4824015,3_4824016,3_4824018,3_4824019,3_4824042,3_4824097,3_4824098,3_4824104	+	AT3G14420.1,AT3G14420.2,AT3G14420.6,AT3G14420.4,AT3G14420.3,AT3G14420.5	356.7579854,13.9007678,7.7547454,0.731686,0.0949516,0.0805226
AT3G14595	AT3G14595	4	3_4910260,3_4910262,3_4910345,3_4910346	+	AT3G14595.1	70.9333366
AT3G14600	RPL18AC	12	3_4911935,3_4911946,3_4911951,3_4911952,3_4911967,3_4911968,3_4912024,3_4912035,3_4912049,3_4912050,3_4912051,3_4912052	+	AT3G14600.1	359.0306117
AT3G14930	HEME1	4	3_5022838,3_5022850,3_5022853,3_5022893	+	AT3G14930.1,AT3G14930.2,AT3G14930.3	64.879133,43.3195063,21.6082997
AT3G15000	MORF8	1	3_5052334	+	AT3G15000.1	199.212092
AT3G15190	RPS20	7	3_5117476,3_5117485,3_5117488,3_5117497,3_5117498,3_5117511,3_5117512	+	AT3G15190.1	340.4969579
AT3G15360	ATHM4	6	3_5189431,3_5189443,3_5189532,3_5189533,3_5189547,3_5189551	+	AT3G15360.1	288.8759745
AT3G15640	COX5B-1	10	3_5301409,3_5301437,3_5301504,3_5301505,3_5301563,3_5301566,3_5301567,3_5301568,3_5301569,3_5301570	+	AT3G15640.1,AT3G15640.2	131.5135792,9.4669693
AT3G15730	PLDALPHA1	14	3_5333620,3_5333621,3_5333627,3_5333671,3_5333672,3_5333682,3_5333683,3_5333685,3_5333686,3_5333687,3_5333695,3_5333702,3_5333703,3_5333704	+	AT3G15730.1	284.1405564
AT3G15850	ADS3	3	3_5361127,3_5361142,3_5361143	+	AT3G15850.1	61.6072441
AT3G16080	RPL37C	15	3_5455695,3_5455733,3_5455752,3_5455753,3_5455754,3_5455786,3_5455808,3_5455815,3_5455816,3_5455827,3_5455828,3_5455829,3_5455833,3_5455834,3_5455836	+	AT3G16080.1,AT3G16080.2	440.0194613,1.0137887
AT3G16100	RABG3C	3	3_5460642,3_5460662,3_5460698	+	AT3G16100.1	44.8081903
AT3G16240	TIP2-1	6	3_5506818,3_5506846,3_5506902,3_5506906,3_5506907,3_5506909	+	AT3G16240.1	661.2743843
AT3G16370	APG	1	3_5558478	+	AT3G16370.1	110.6757122
AT3G16480	MPPA2	1	3_5602810	+	AT3G16480.1	38.4968413
AT3G16552	AT3G16552	6	3_5632876,3_5632877,3_5632883,3_5632884,3_5632885,3_5632886	+	AT3G16552.1	NA
AT3G16770	RAP2-3	8	3_5706844,3_5706845,3_5706846,3_5706847,3_5706881,3_5706893,3_5706894,3_5706913	+	AT3G16770.1	70.7596218
AT3G16850	AT3G16850	1	3_5751194	+	AT3G16850.1	51.6674545
AT3G17000	UBC32	2	3_5799559,3_5799560	+	AT3G17000.1	38.3662678
AT3G17100	BHLH147	2	3_5832352,3_5832353	+	AT3G17100.2,AT3G17100.1	24.4944183,8.7428284
AT3G17210	ATHS1	9	3_5882954,3_5883051,3_5883052,3_5883053,3_5883054,3_5883055,3_5883056,3_5883057,3_5883084	+	AT3G17210.2,AT3G17210.1	171.0882567,0
AT3G17410	AT3G17410	4	3_5959013,3_5959049,3_5959050,3_5959053	+	AT3G17410.1,AT3G17410.2	60.6192685,0.0314039
AT3G17780	AT3G17780	1	3_6088337	+	AT3G17780.1	69.447131
AT3G18060	AT3G18060	2	3_6186991,3_6186992	+	AT3G18060.1	57.0048811
AT3G18165	MOS4	2	3_6225271,3_6225279	+	AT3G18165.1	79.1236599
AT3G18290	EMB2454	2	3_6280240,3_6280295	+	AT3G18290.1	30.9379882
AT3G18410	AT3G18410	5	3_6324464,3_6324499,3_6324500,3_6324516,3_6324538	+	AT3G18410.1	493.0968811
AT3G18740	RPL30C	10	3_6453885,3_6453886,3_6453887,3_6453912,3_6453913,3_6453923,3_6453948,3_6453949,3_6453958,3_6453965	+	AT3G18740.1	937.1023668
AT3G18780	ACT2	19	3_6476897,3_6476947,3_6476948,3_6476949,3_6476950,3_6476953,3_6476958,3_6476959,3_6476982,3_6476984,3_6476985,3_6476986,3_6476987,3_6476991,3_6477096,3_6477102,3_6477103,3_6477107,3_6477108	+	AT3G18780.2,AT3G18780.3,AT3G18780.1	519.4363649,0.6831814,0.4617604
AT3G18820	RABG3F	10	3_6486092,3_6486095,3_6486098,3_6486099,3_6486177,3_6486178,3_6486183,3_6486184,3_6486185,3_6486186	+	AT3G18820.1	137.1285224
AT3G18890	TIC62	1	3_6514912	+	AT3G18890.1	35.7020179
AT3G19420	ATPEN2	1	3_6735509	+	AT3G19420.1	38.2916255
AT3G19440	AT3G19440	2	3_6741807,3_6741808	+	AT3G19440.1,AT3G19440.2	6.489222,0.3511431
AT3G19760	RH2	2	3_6866358,3_6866497	+	AT3G19760.1	144.3452721
AT3G19910	BBR	6	3_6929354,3_6929398,3_6929429,3_6929430,3_6929431,3_6929442	+	AT3G19910.1	45.9013962
AT3G20000	TOM40-1	1	3_6970523	+	AT3G20000.1,AT3G20000.2	128.5268846,0.1140573
AT3G20790	AT3G20790	1	3_7271175	+	AT3G20790.1	42.4844728
AT3G22200	POP2	5	3_7838887,3_7838933,3_7838934,3_7838935,3_7838936	+	AT3G22200.1,AT3G22200.2	193.4933224,0.2033521
AT3G22290	AT3G22290	2	3_7885509,3_7885510	+	AT3G22290.1,AT3G22290.2	30.1850696,1.5479006
AT3G22440	FRL4A	1	3_7962043	+	AT3G22440.1	168.094232
AT3G22850	AT3G22850	3	3_8090353,3_8090395,3_8090396	+	AT3G22850.1	167.5470189
AT3G22890	APS1	8	3_8114836,3_8114837,3_8114907,3_8114908,3_8114909,3_8114910,3_8114923,3_8114924	+	AT3G22890.1	257.7406855
AT3G22960	PKP1	4	3_8141836,3_8141837,3_8141904,3_8141918	+	AT3G22960.1	173.1475775
AT3G23050	IAA7	8	3_8196821,3_8196822,3_8196823,3_8196824,3_8196825,3_8196837,3_8196866,3_8196867	+	AT3G23050.1,AT3G23050.3	82.0566712,1.3405992
AT3G23325	AT3G23325	2	3_8347007,3_8347008	+	AT3G23325.1	53.8514303
AT3G23390	RPL36AB	5	3_8376230,3_8376231,3_8376313,3_8376314,3_8376315	+	AT3G23390.1	780.4197303
AT3G23600	AT3G23600	9	3_8475673,3_8475680,3_8475684,3_8475687,3_8475758,3_8475778,3_8475780,3_8475815,3_8475825	+	AT3G23600.1,AT3G23600.2	315.214007,1.0758313
AT3G23640	HGL1	2	3_8509448,3_8509449	+	AT3G23640.1,AT3G23640.2,AT3G23640.3	17.0357356,7.1990061,0.0609516
AT3G23940	DHAD	1	3_8652502	+	AT3G23940.1,AT3G23940.2	86.0109895,0.2298223
AT3G24100	AT3G24100	14	3_8704128,3_8704129,3_8704153,3_8704154,3_8704155,3_8704166,3_8704169,3_8704170,3_8704172,3_8704175,3_8704176,3_8704177,3_8704209,3_8704210	+	AT3G24100.1	94.354998
AT3G24160	PMP	22	3_8728995,3_8729003,3_8729089,3_8729092,3_8729096,3_8729099,3_8729100,3_8729217,3_8729247,3_8729248,3_8729249,3_8729250,3_8729252,3_8729260,3_8729261,3_8729262,3_8729263,3_8729264,3_8729269,3_8729270,3_8729271,3_8729274	+	AT3G24160.1	163.1668225
AT3G24190	AT3G24190	2	3_8747762,3_8747816	+	AT3G24190.1	21.2159964
AT3G24550	PERK1	3	3_8963394,3_8963395,3_8963396	+	AT3G24550.1	55.1969614
AT3G24830	RPL13AB	17	3_9065912,3_9065916,3_9065924,3_9065933,3_9065938,3_9065944,3_9065946,3_9065976,3_9065977,3_9065978,3_9065980,3_9065982,3_9065983,3_9065984,3_9065985,3_9065986,3_9065998	+	AT3G24830.1	935.3194267
AT3G25040	ERD2B	7	3_9126192,3_9126230,3_9126231,3_9126258,3_9126259,3_9126260,3_9126261	+	AT3G25040.1	66.7482106
AT3G25220	FKBP15-1	4	3_9184502,3_9184549,3_9184550,3_9184553	+	AT3G25220.1	108.2073797
AT3G25230	FKBP62	1	3_9191334	+	AT3G25230.1,AT3G25230.2	40.1571209,10.6359491
AT3G25585	AAPT2	1	3_9298573	+	AT3G25585.1,AT3G25585.6,AT3G25585.4,AT3G25585.2,AT3G25585.5,AT3G25585.3	35.0147179,1.426667,0.9729399,0.2004982,0.0960036,0.0647384
AT3G25690	CHUP1	5	3_9357780,3_9357781,3_9357799,3_9357808,3_9357831	+	AT3G25690.2,AT3G25690.1,AT3G25690.5,AT3G25690.4,AT3G25690.6,AT3G25690.3	8.1805144,2.537977,0.4351905,0.140249,0.032248,0.007334
AT3G26060	PRXQ	6	3_9526220,3_9526221,3_9526222,3_9526224,3_9526237,3_9526326	+	AT3G26060.1,AT3G26060.2,AT3G26060.3	169.5687955,22.4097603,15.5932165
AT3G26070	PAP4	1	3_9528259	+	AT3G26070.1	65.7926915
AT3G26430	AT3G26430	5	3_9673282,3_9673292,3_9673340,3_9673403,3_9673413	+	AT3G26430.1	33.6003051
AT3G26570	PHT2-1	3	3_9758431,3_9758465,3_9758469	+	AT3G26570.2,AT3G26570.1	73.8015624,5.8142295
AT3G26650	GAPA1	25	3_9796774,3_9796889,3_9796894,3_9796895,3_9796896,3_9796897,3_9796898,3_9796899,3_9796901,3_9796916,3_9796917,3_9796918,3_9796919,3_9796932,3_9796933,3_9796934,3_9796936,3_9796937,3_9796938,3_9796950,3_9796951,3_9796957,3_9796962,3_9796963,3_9796964	+	AT3G26650.1	579.7329085
AT3G26710	CCB1	1	3_9814687	+	AT3G26710.1	67.5972566
AT3G27090	AT3G27090	15	3_9991470,3_9991471,3_9991478,3_9991543,3_9991653,3_9991661,3_9991663,3_9991667,3_9991668,3_9991683,3_9991697,3_9991698,3_9991699,3_9991710,3_9991752	+	AT3G27090.1,AT3G27090.3,AT3G27090.2	120.1908167,0.9695141,0.1604338
AT3G27160	GHS1	9	3_10018896,3_10018900,3_10018901,3_10018925,3_10018947,3_10018948,3_10018949,3_10018952,3_10018953	+	AT3G27160.1	270.4020183
AT3G27430	PBB1	12	3_10155103,3_10155147,3_10155157,3_10155166,3_10155167,3_10155170,3_10155197,3_10155198,3_10155208,3_10155209,3_10155225,3_10155227	+	AT3G27430.2,AT3G27430.3,AT3G27430.1	131.4791531,0.2340317,0
AT3G27820	ATMDAR4	6	3_10317964,3_10318018,3_10318019,3_10318020,3_10318021,3_10318022	+	AT3G27820.1	58.1679955
AT3G27850	RPL12C	2	3_10325566,3_10325567	+	AT3G27850.1	454.4779662
AT3G28715	VHA-D2	2	3_10780502,3_10780555	+	AT3G28715.1,AT3G28715.2	77.3028827,0.133564
AT3G28730	SSRP1	1	3_10788584	+	AT3G28730.1	39.6588594
AT3G29320	PHS1	1	3_11257712	+	AT3G29320.1	51.006125
AT3G29755	AT3G29755	6	3_11586185,3_11586186,3_11586187,3_11586188,3_11586189,3_11586190	+	AT3G29755.1	NA
AT3G32930	AT3G32930	4	3_13490724,3_13490735,3_13490744,3_13490791	+	AT3G32930.2,AT3G32930.1	60.299923,0
AT3G41768	AT3G41768	29	3_14198146,3_14198147,3_14198148,3_14198149,3_14198150,3_14198151,3_14198152,3_14198153,3_14198154,3_14198155,3_14198156,3_14198157,3_14198158,3_14198159,3_14198160,3_14198970,3_14198989,3_14198990,3_14198991,3_14198992,3_14198993,3_14198994,3_14198995,3_14198996,3_14198997,3_14198998,3_14198999,3_14199000,3_14199001	+	AT3G41768.1	NA
AT3G06355		7	3_14201030,3_14201031,3_14201032,3_14201033,3_14201046,3_14201047,3_14201048	+	AT3G06355.1	NA
AT3G42150	AT3G42150	2	3_14311521,3_14311522	+	AT3G42150.1,AT3G42150.3,AT3G42150.2	18.8266954,0.3088157,0.0786155
AT3G44310	NIT1	5	3_15988905,3_15988939,3_15988984,3_15988991,3_15988992	+	AT3G44310.1,AT3G44310.4,AT3G44310.2,AT3G44310.3	71.8738789,22.3108242,10.1558532,697.9396072
AT3G44590	RPP2D	2	3_16164712,3_16164742	+	AT3G44590.1,AT3G44590.2	129.6526203,25.0582056
AT3G44620	AT3G44620	3	3_16195503,3_16195649,3_16195650	+	AT3G44620.1,AT3G44620.2	27.9563758,0.4858305
AT3G44890	RPL9	7	3_16388328,3_16388335,3_16388336,3_16388348,3_16388351,3_16388373,3_16388377	+	AT3G44890.1	203.2671537
AT3G45050	AT3G45050	2	3_16477191,3_16477192	+	AT3G45050.3,AT3G45050.1	14.5899138,0.4615688
AT3G46040	RPS15AD	4	3_16915612,3_16915613,3_16915614,3_16915680	+	AT3G46040.1	174.5924121
AT3G46060	RABE1C	12	3_16919826,3_16919831,3_16919832,3_16919855,3_16919856,3_16919857,3_16919858,3_16919876,3_16919905,3_16919906,3_16919946,3_16919950	+	AT3G46060.1,AT3G46060.2,AT3G46060.3	124.1859659,2.4783083,0.2252107
AT3G46430	AT3G46430	16	3_17088547,3_17088585,3_17088592,3_17088608,3_17088609,3_17088611,3_17088622,3_17088680,3_17088709,3_17088710,3_17088720,3_17088727,3_17088728,3_17088742,3_17088743,3_17088744	+	AT3G46430.1	287.2615086
AT3G46560	TIM9	5	3_17139332,3_17139385,3_17139386,3_17139387,3_17139449	+	AT3G46560.1	181.6894857
AT3G46780	PTAC16	5	3_17231100,3_17231103,3_17231115,3_17231116,3_17231117	+	AT3G46780.1	304.728283
AT3G47520	MDH	1	3_17514994	+	AT3G47520.1	93.744403
AT3G47650	AT3G47650	7	3_17570320,3_17570356,3_17570357,3_17570358,3_17570397,3_17570398,3_17570427	+	AT3G47650.1	204.1094169
AT3G47833	SDH7A	7	3_17649936,3_17649939,3_17649940,3_17649941,3_17649952,3_17649957,3_17649960	+	AT3G47833.1	75.6714648
AT3G48110	GLYRS-2	2	3_17771049,3_17771088	+	AT3G48110.1	16.7107992
AT3G48140	T24C20_20	18	3_17779376,3_17779382,3_17779392,3_17779393,3_17779394,3_17779414,3_17779427,3_17779438,3_17779450,3_17779454,3_17779459,3_17779480,3_17779481,3_17779482,3_17779483,3_17779484,3_17779487,3_17779488	+	AT3G48140.1	861.1668185
AT3G48730	GSA2	2	3_18051599,3_18051650	+	AT3G48730.1	166.061975
AT3G48890	MSBP2	4	3_18131472,3_18131473,3_18131474,3_18131486	+	AT3G48890.1	86.9351522
AT3G49430	SR34A	2	3_18334969,3_18335007	+	AT3G49430.1,AT3G49430.7,AT3G49430.6,AT3G49430.2,AT3G49430.4,AT3G49430.5	70.2480976,2.5372327,1.021009,0.3060714,0.2708235,0
AT3G49470	NACA2	5	3_18342285,3_18342341,3_18342347,3_18342358,3_18342359	+	AT3G49470.1	49.5361942
AT3G49910	RPL26A	12	3_18504797,3_18504820,3_18504832,3_18504835,3_18504841,3_18504842,3_18504848,3_18504849,3_18504858,3_18504859,3_18504860,3_18504861	+	AT3G49910.1	1102.539949
AT3G50000	CKA2	1	3_18536831	+	AT3G50000.1	63.3739311
AT3G50530	CRK5	2	3_18756654,3_18756685	+	AT3G50530.1,AT3G50530.2	18.0398743,1.4041368
AT3G51140	AT3G51140	3	3_18999607,3_18999615,3_18999616	+	AT3G51140.1,AT3G51140.2	50.6490699,0.2346326
AT3G51260	PAD1	5	3_19032885,3_19032900,3_19032903,3_19032904,3_19033007	+	AT3G51260.1,AT3G51260.2	134.4102552,0.0229632
AT3G51370	AT3G51370	2	3_19072051,3_19072109	+	AT3G51370.3,AT3G51370.1,AT3G51370.2	43.7849522,35.5977783,0.054681
AT3G51460	SAC7	2	3_19097291,3_19097292	+	AT3G51460.1	36.5831493
AT3G51510	AT3G51510	2	3_19109878,3_19109882	+	AT3G51510.1	66.3770514
AT3G51730	AT3G51730	15	3_19188468,3_19188539,3_19188540,3_19188541,3_19188563,3_19188581,3_19188590,3_19188591,3_19188592,3_19188593,3_19188594,3_19188595,3_19188598,3_19188606,3_19188613	+	AT3G51730.1	150.2141379
AT3G52140	FMT	3	3_19341411,3_19341412,3_19341542	+	AT3G52140.1,AT3G52140.2,AT3G52140.4,AT3G52140.3	38.5062503,0.0087726,0
AT3G52150	AT3G52150	2	3_19343180,3_19343238	+	AT3G52150.1	138.9493137
AT3G52200	LTA3	3	3_19366260,3_19366273,3_19366333	+	AT3G52200.1,AT3G52200.2	58.5159445,0.0670224
AT3G52230	AT3G52230	10	3_19372441,3_19372480,3_19372492,3_19372493,3_19372500,3_19372501,3_19372505,3_19372514,3_19372515,3_19372550	+	AT3G52230.1	84.4926213
AT3G52300	ATPQ	14	3_19398120,3_19398177,3_19398178,3_19398179,3_19398183,3_19398185,3_19398186,3_19398187,3_19398198,3_19398199,3_19398209,3_19398213,3_19398214,3_19398226	+	AT3G52300.1,AT3G52300.2	591.0250842,0.0779356
AT3G52380	CP33	2	3_19422948,3_19422949	+	AT3G52380.1	168.904196
AT3G52580	RPS14C	11	3_19504817,3_19504829,3_19504830,3_19504831,3_19504832,3_19504833,3_19504834,3_19504835,3_19504838,3_19504841,3_19504842	+	AT3G52580.1	221.348335
AT3G52590	RPL40B	24	3_19506673,3_19506750,3_19506751,3_19506752,3_19506754,3_19506757,3_19506758,3_19506759,3_19506760,3_19506761,3_19506768,3_19506769,3_19506770,3_19506771,3_19506772,3_19506775,3_19506776,3_19506777,3_19506778,3_19506792,3_19506811,3_19506812,3_19506816,3_19506828	+	AT3G52590.1	884.1235513
AT3G52850	VSR1	2	3_19591760,3_19591761	+	AT3G52850.1	77.4060481
AT3G52960	PRXIIE	1	3_19640454	+	AT3G52960.1	247.3823838
AT3G52990	AT3G52990	2	3_19652383,3_19652399	+	AT3G52990.1,AT3G52990.2	117.3198186,0.0404306
AT3G53580	DAPF	2	3_19867024,3_19867039	+	AT3G53580.1	112.6136635
AT3G53870	RPS3B	21	3_19952813,3_19952832,3_19952835,3_19952841,3_19952842,3_19952843,3_19952844,3_19952848,3_19952849,3_19952850,3_19952852,3_19952853,3_19952855,3_19952859,3_19952869,3_19952875,3_19952876,3_19952877,3_19952878,3_19952879,3_19952915	+	AT3G53870.1	602.3621408
AT3G54050	FBP	4	3_20018560,3_20018561,3_20018562,3_20018685	+	AT3G54050.2,AT3G54050.1	246.4622048,70.9788722
AT3G54110	PUMP1	2	3_20041096,3_20041162	+	AT3G54110.1	109.6101501
AT3G54840	RABF1	6	3_20320897,3_20320910,3_20320916,3_20320917,3_20320930,3_20320959	+	AT3G54840.1,AT3G54840.2,AT3G54840.3	43.4081179,3.8932271,0.0971745
AT3G55260	HEXO1	1	3_20492985	+	AT3G55260.1	24.1614718
AT3G55280	RPL23AB	2	3_20501560,3_20501627	+	AT3G55280.1,AT3G55280.2,AT3G55280.3	140.4773078,123.8945585,0.0438511
AT3G55410	AT3G55410	9	3_20545852,3_20545861,3_20545864,3_20545869,3_20545870,3_20545871,3_20545872,3_20545883,3_20545918	+	AT3G55410.1,AT3G55410.2	70.0185605,0.2359098
AT3G55440	CTIMC	20	3_20556112,3_20556147,3_20556150,3_20556162,3_20556174,3_20556178,3_20556179,3_20556185,3_20556199,3_20556200,3_20556205,3_20556206,3_20556207,3_20556210,3_20556241,3_20556243,3_20556244,3_20556245,3_20556247,3_20556248	+	AT3G55440.1	714.4151917
AT3G55460	SCL30	1	3_20563639	+	AT3G55460.1	90.7326579
AT3G55620	EIF6-2	5	3_20636373,3_20636374,3_20636375,3_20636378,3_20636470	+	AT3G55620.1	91.3796839
AT3G55750	RPL35AD	15	3_20699938,3_20699939,3_20699940,3_20699941,3_20699942,3_20699962,3_20699963,3_20699964,3_20699965,3_20699966,3_20699967,3_20699968,3_20699969,3_20699970,3_20699971	+	AT3G55750.1	418.3961525
AT3G55770	WLIM2B	6	3_20705203,3_20705255,3_20705264,3_20705274,3_20705275,3_20705281	+	AT3G55770.1,AT3G55770.2,AT3G55770.5,AT3G55770.3,AT3G55770.4,AT3G55770.6,AT3G55770.7	106.7808519,73.9807505,8.1021518,4.7666111,2.9580295,1.2167561,0.022317
AT3G55800	SBPASE	16	3_20711434,3_20711444,3_20711449,3_20711450,3_20711451,3_20711452,3_20711453,3_20711454,3_20711455,3_20711456,3_20711472,3_20711473,3_20711474,3_20711475,3_20711476,3_20711501	+	AT3G55800.1	291.2736745
AT3G56010	AT3G56010	1	3_20789792	+	AT3G56010.1	45.4236048
AT3G56130	AT3G56130	4	3_20829148,3_20829149,3_20829150,3_20829170	+	AT3G56130.1,AT3G56130.2,AT3G56130.5,AT3G56130.3,AT3G56130.4	87.3387227,1.6531876,0.9138663,0.0334239,0.0230586
AT3G56310	AGAL3	3	3_20885837,3_20885851,3_20885852	+	AT3G56310.1,AT3G56310.2	116.402302,0.0102917
AT3G56490	HIT3	5	3_20943138,3_20943241,3_20943257,3_20943262,3_20943286	+	AT3G56490.1	95.9178155
AT3G56680	AT3G56680	1	3_20993589	+	AT3G56680.1	61.2739342
AT3G56940	CRD1	18	3_21078310,3_21078311,3_21078312,3_21078316,3_21078317,3_21078326,3_21078327,3_21078328,3_21078332,3_21078333,3_21078346,3_21078349,3_21078350,3_21078351,3_21078352,3_21078356,3_21078371,3_21078372	+	AT3G56940.1,AT3G56940.2	821.8600293,0.013661
AT3G57090	FIS1A	1	3_21130100	+	AT3G57090.1	60.9236111
AT3G57280	FAX1	1	3_21195633	+	AT3G57280.1	43.0461488
AT3G57320	AT3G57320	4	3_21210721,3_21210742,3_21210743,3_21210760	+	AT3G57320.1	11.6943035
AT3G57650	LPAT2	5	3_21352974,3_21352998,3_21352999,3_21353089,3_21353090	+	AT3G57650.1	52.1909841
AT3G57890	AT3G57890	4	3_21441824,3_21441843,3_21441854,3_21441930	+	AT3G57890.1,AT3G57890.2	47.812513,0
AT3G58035	AT3G58035	4	3_21487348,3_21487362,3_21487363,3_21487382	+	AT3G58035.1	NA
AT3G58610	AT3G58610	14	3_21674674,3_21674741,3_21674742,3_21674750,3_21674752,3_21674753,3_21674754,3_21674755,3_21674759,3_21674760,3_21674761,3_21674762,3_21674763,3_21674770	+	AT3G58610.2,AT3G58610.1,AT3G58610.3	277.498846,165.3854226,0.1154338
AT3G58680	MBF1B	3	3_21708770,3_21708776,3_21708793	+	AT3G58680.1	221.4811809
AT3G59090	AT3G59090	1	3_21842620	+	AT3G59090.1,AT3G59090.2,AT3G59090.4,AT3G59090.3	13.6441933,1.3111291,0.6781726,0.217576
AT3G59500	AT3G59500	4	3_21988248,3_21988268,3_21988269,3_21988278	+	AT3G59500.1,AT3G59500.2	36.0168454,0.0539168
AT3G59600	NRPB8B	3	3_22017988,3_22018011,3_22018037	+	AT3G59600.1	50.6951513
AT3G59780	AT3G59780	5	3_22090369,3_22090370,3_22090378,3_22090394,3_22090398	+	AT3G59780.1	37.3468149
AT3G59810	LSM6A	2	3_22097794,3_22097795	+	AT3G59810.1,AT3G59810.3,AT3G59810.2	43.852817,4.6531229,0.2339899
AT3G59920	GDI2	10	3_22138319,3_22138328,3_22138356,3_22138357,3_22138358,3_22138359,3_22138405,3_22138406,3_22138407,3_22138415	+	AT3G59920.1	164.8197041
AT3G59970	MTHFR1	11	3_22154382,3_22154390,3_22154391,3_22154392,3_22154393,3_22154402,3_22154403,3_22154407,3_22154411,3_22154412,3_22154448	+	AT3G59970.3,AT3G59970.1,AT3G59970.2	228.1412788,0.2370474,0
AT3G60245	RPL37AC	19	3_22269778,3_22269791,3_22269793,3_22269794,3_22269795,3_22269797,3_22269798,3_22269819,3_22269820,3_22269821,3_22269822,3_22269823,3_22269824,3_22269825,3_22269826,3_22269828,3_22269834,3_22269835,3_22269836	+	AT3G60245.1	1868.9838434
AT3G60300	AT3G60300	8	3_22287380,3_22287381,3_22287382,3_22287383,3_22287384,3_22287402,3_22287438,3_22287440	+	AT3G60300.1,AT3G60300.2	54.8223244,0.0753815
AT3G60600	PVA11	4	3_22402463,3_22402487,3_22402510,3_22402554	+	AT3G60600.1,AT3G60600.2,AT3G60600.3	114.9897911,2.2828302,0.159291
AT3G60750	TKL-1	16	3_22456961,3_22456962,3_22456966,3_22456968,3_22456969,3_22456985,3_22456992,3_22457015,3_22457017,3_22457027,3_22457028,3_22457044,3_22457045,3_22457048,3_22457049,3_22457050	+	AT3G60750.1	364.6967725
AT3G61050	NTMC2TYPE4	1	3_22601100	+	AT3G61050.2,AT3G61050.1	44.4777979,14.4161506
AT3G61110	RPS27B	17	3_22612676,3_22612701,3_22612702,3_22612714,3_22612715,3_22612716,3_22612722,3_22612728,3_22612729,3_22612730,3_22612731,3_22612732,3_22612733,3_22612734,3_22612735,3_22612736,3_22612740	+	AT3G61110.1	495.8715173
AT3G61240	RH12	3	3_22669460,3_22669461,3_22669462	+	AT3G61240.1,AT3G61240.2	45.1915736,3.0040606
AT3G61430	PIP1-1	7	3_22735212,3_22735213,3_22735214,3_22735234,3_22735235,3_22735241,3_22735249	+	AT3G61430.2,AT3G61430.1	467.8174443,10.5356325
AT3G61440	CYSC1	7	3_22737898,3_22737910,3_22737911,3_22737912,3_22737916,3_22737917,3_22737918	+	AT3G61440.1,AT3G61440.2,AT3G61440.4,AT3G61440.3	233.2675226,18.0729447,2.6696081,1.4977216
AT3G61470	LHCA2	28	3_22747081,3_22747088,3_22747095,3_22747096,3_22747097,3_22747098,3_22747099,3_22747100,3_22747106,3_22747109,3_22747110,3_22747111,3_22747112,3_22747113,3_22747114,3_22747117,3_22747118,3_22747119,3_22747120,3_22747121,3_22747122,3_22747123,3_22747124,3_22747125,3_22747148,3_22747149,3_22747150,3_22747151	+	AT3G61470.1	1675.4321592
AT3G61870	AT3G61870	2	3_22903914,3_22903928	+	AT3G61870.1,AT3G61870.2	67.6155311,0.9350774
AT3G62030	CYP20-3	17	3_22975181,3_22975182,3_22975183,3_22975186,3_22975187,3_22975189,3_22975190,3_22975191,3_22975192,3_22975193,3_22975194,3_22975200,3_22975201,3_22975209,3_22975217,3_22975218,3_22975253	+	AT3G62030.1,AT3G62030.3,AT3G62030.2	570.925184,0.060004,0
AT3G62245	AT3G62245	7	3_23036910,3_23036911,3_23036912,3_23036913,3_23036914,3_23036915,3_23036916	+	AT3G62245.1	NA
AT3G62250	RPS27AC	24	3_23037674,3_23037694,3_23037696,3_23037697,3_23037705,3_23037707,3_23037708,3_23037709,3_23037712,3_23037713,3_23037714,3_23037715,3_23037716,3_23037720,3_23037721,3_23037722,3_23037723,3_23037724,3_23037727,3_23037728,3_23037729,3_23037730,3_23037731,3_23037732	+	AT3G62250.1	802.5351608
AT3G62290	ARFA1E	40	3_23051648,3_23051649,3_23051650,3_23051651,3_23051671,3_23051673,3_23051675,3_23051721,3_23053374,3_23053413,3_23053414,3_23053415,3_23053416,3_23053570,3_23053604,3_23053605,3_23053606,3_23053608,3_23053612,3_23053626,3_23053627,3_23053630,3_23053641,3_23053642,3_23053646,3_23053669,3_23053670,3_23053671,3_23053675,3_23053676,3_23053686,3_23053688,3_23053689,3_23053690,3_23053693,3_23053697,3_2…	+	AT3G62290.1,AT3G62290.2,AT3G62290.3	830.545331,1.4610553,0
AT3G62400	AT3G62400	13	3_23090538,3_23090539,3_23090548,3_23090549,3_23090574,3_23090595,3_23090617,3_23090645,3_23090646,3_23090652,3_23090666,3_23090667,3_23090668	+	AT3G62400.2	246.9861013
AT3G62560	AT3G62560	2	3_23138898,3_23138939	+	AT3G62560.1	47.7998905
AT3G62580	AT3G62580	5	3_23147830,3_23147831,3_23147832,3_23147858,3_23147859	+	AT3G62580.1	165.0806915
AT3G62830	UXS2	5	3_23235497,3_23235501,3_23235510,3_23235511,3_23235512	+	AT3G62830.1,AT3G62830.2	101.3993229,2.305082
AT3G63490	RPL1	10	3_23446153,3_23446208,3_23446209,3_23446210,3_23446213,3_23446225,3_23446231,3_23446232,3_23446233,3_23446234	+	AT3G63490.1,AT3G63490.2	347.7173859,0.2003262
AT3G63520	CCD1	10	3_23455914,3_23455988,3_23456009,3_23456021,3_23456022,3_23456023,3_23456024,3_23456025,3_23456034,3_23456037	+	AT3G63520.1	71.8601664
AT3G63540	AT3G63540	8	3_23459338,3_23459332,3_23459331,3_23459304,3_23459301,3_23459298,3_23459297,3_23459286	-	AT3G63540.1	220.0918133
AT3G63460	SEC31B	9	3_23430967,3_23430867,3_23430866,3_23430834,3_23430830,3_23430829,3_23430828,3_23430780,3_23430770	-	AT3G63460.1,AT3G63460.2,AT3G63460.3	61.3658459,10.344502,0
AT3G63410	VTE3	10	3_23415779,3_23415754,3_23415743,3_23415687,3_23415683,3_23415682,3_23415674,3_23415673,3_23415672,3_23415671	-	AT3G63410.1	330.8676892
AT3G63190	RRF	3	3_23342733,3_23342712,3_23342676	-	AT3G63190.1	107.815369
AT3G63140	CSP41A	6	3_23326968,3_23326967,3_23326930,3_23326929,3_23326928,3_23326920	-	AT3G63140.1	207.431389
AT3G63003	AT3G63003	11	3_23285639,3_23285638,3_23285632,3_23285631,3_23285630,3_23285629,3_23285628,3_23285627,3_23285608,3_23285607,3_23285606	-	AT3G63003.1	NA
AT3G62980	TIR1	2	3_23273199,3_23273198	-	AT3G62980.1	41.9165344
AT3G62870	RPL7AB	18	3_23242812,3_23242786,3_23242784,3_23242783,3_23242782,3_23242781,3_23242780,3_23242779,3_23242774,3_23242773,3_23242766,3_23242765,3_23242755,3_23242754,3_23242736,3_23242735,3_23242725,3_23242699	-	AT3G62870.1	586.2718887
AT3G62840	AT3G62840	5	3_23235703,3_23235631,3_23235614,3_23235607,3_23235599	-	AT3G62840.1,AT3G62840.2	139.0380819,65.86235
AT3G62790	AT3G62790	12	3_23223191,3_23223175,3_23223174,3_23223171,3_23223156,3_23223155,3_23223154,3_23223153,3_23223152,3_23223151,3_23223115,3_23223114	-	AT3G62790.1	144.7534232
AT3G62700	ABCC14	2	3_23190397,3_23190337	-	AT3G62700.1	23.4285322
AT3G62360	AT3G62360	1	3_23072911	-	AT3G62360.2,AT3G62360.1	37.3613704,0
AT3G62120	AT3G62120	4	3_23001158,3_23001122,3_23001121,3_23001112	-	AT3G62120.1,AT3G62120.2,AT3G62120.3	105.8310363,0.8475562,0.6013842
AT3G61260	AT3G61260	9	3_22675419,3_22675390,3_22675388,3_22675387,3_22675386,3_22675385,3_22675309,3_22675302,3_22675301	-	AT3G61260.1	132.4656709
AT3G61200	AT3G61200	3	3_22657533,3_22657526,3_22657525	-	AT3G61200.1	69.567103
AT3G60820	PBF1	7	3_22471986,3_22471900,3_22471899,3_22471898,3_22471878,3_22471877,3_22471869	-	AT3G60820.1,AT3G60820.2,AT3G60820.3	173.5464667,0.0508545,7.1046767
AT3G60770	RPS13A	13	3_22460447,3_22460429,3_22460428,3_22460386,3_22460385,3_22460373,3_22460372,3_22460371,3_22460370,3_22460369,3_22460368,3_22460356,3_22460346	-	AT3G60770.1	550.5057559
AT3G60210	AT3G60210	5	3_22251374,3_22251354,3_22251338,3_22251322,3_22251321	-	AT3G60210.1	68.0540093
AT3G60190	DRP1E	3	3_22244221,3_22244212,3_22244211	-	AT3G60190.1	25.0787596
AT3G59990	MAP2B	3	3_22155813,3_22155812,3_22155771	-	AT3G59990.2,AT3G59990.1,AT3G59990.3,AT3G59990.4	70.5104289,7.5913758,0.7451839,0.1646997
AT3G59540	RPL38B	21	3_21995837,3_21995836,3_21995835,3_21995830,3_21995826,3_21995805,3_21995800,3_21995789,3_21995783,3_21995782,3_21995780,3_21995779,3_21995778,3_21995777,3_21995776,3_21995773,3_21995756,3_21995738,3_21995737,3_21995735,3_21995732	-	AT3G59540.1	667.7316439
AT3G59280	TXR1	2	3_21909148,3_21909124	-	AT3G59280.1	33.1402499
AT3G59020	AT3G59020	4	3_21810751,3_21810684,3_21810636,3_21810635	-	AT3G59020.2,AT3G59020.1	32.031396,0.4793195
AT3G58730	VHA-D	14	3_21718430,3_21718429,3_21718428,3_21718409,3_21718401,3_21718400,3_21718399,3_21718375,3_21718374,3_21718366,3_21718365,3_21718352,3_21718342,3_21718334	-	AT3G58730.1	145.1381125
AT3G58580	CCR4-2	3	3_21660849,3_21660803,3_21660802	-	AT3G58580.1	20.1497377
AT3G58560	CCR4-1	2	3_21650649,3_21650644	-	AT3G58560.1	40.1636597
AT3G58500	PP2A3	7	3_21635395,3_21635394,3_21635367,3_21635343,3_21635307,3_21635306,3_21635255	-	AT3G58500.1	144.0065416
AT3G58460	RBL15	2	3_21623259,3_21623258	-	AT3G58460.1,AT3G58460.2	28.0323087,0.0148382
AT3G58140	AT3G58140	1	3_21529924	-	AT3G58140.1	54.3132758
AT3G57870	SCE1	5	3_21428759,3_21428731,3_21428704,3_21428703,3_21428692	-	AT3G57870.1	177.0663249
AT3G57785	AT3G57785	3	3_21404644,3_21404643,3_21404624	-	AT3G57785.1	90.3679255
AT3G57610	PURA	3	3_21334511,3_21334499,3_21334399	-	AT3G57610.1	95.2064411
AT3G57410	VLN3	5	3_21243279,3_21243257,3_21243212,3_21243211,3_21243210	-	AT3G57410.1,AT3G57410.7,AT3G57410.9,AT3G57410.2,AT3G57410.8,AT3G57410.4,AT3G57410.6,AT3G57410.5,AT3G57410.3	23.8919479,7.2495878,1.0648317,0.1997207,0.0643554,0.0518595,0.0157909,0
AT3G57290	EIF3E	6	3_21196702,3_21196691,3_21196662,3_21196659,3_21196658,3_21196620	-	AT3G57290.1	128.2396339
AT3G56910	PSRP5	22	3_21069518,3_21069517,3_21069513,3_21069512,3_21069511,3_21069510,3_21069509,3_21069508,3_21069507,3_21069500,3_21069491,3_21069490,3_21069489,3_21069488,3_21069485,3_21069484,3_21069480,3_21069479,3_21069462,3_21069461,3_21069454,3_21069449	-	AT3G56910.1	753.8520155
AT3G56800	CAM2	8	3_21034901,3_21034900,3_21034874,3_21034873,3_21034863,3_21034861,3_21034860,3_21034826	-	AT3G56800.1	211.1747047
AT3G56340	RPS26C	23	3_20892301,3_20892228,3_20892222,3_20892218,3_20892215,3_20892206,3_20892204,3_20892199,3_20892197,3_20892196,3_20892195,3_20892190,3_20892189,3_20892188,3_20892187,3_20892186,3_20892181,3_20892180,3_20892179,3_20892178,3_20892170,3_20892169,3_20892168	-	AT3G56340.1	644.0089386
AT3G56190	ASNAP2	15	3_20846093,3_20846074,3_20846073,3_20845971,3_20845970,3_20845929,3_20845928,3_20845927,3_20845924,3_20845895,3_20845803,3_20845802,3_20845799,3_20845798,3_20845797	-	AT3G56190.1,AT3G56190.2	101.2678709,0.023932
AT3G56150	TIF3C1	2	3_20833700,3_20833658	-	AT3G56150.1,AT3G56150.2	73.1032715,32.0714641
AT3G56020	RPL41E	20	3_20790785,3_20790784,3_20790783,3_20790782,3_20790781,3_20790766,3_20790741,3_20790737,3_20790730,3_20790723,3_20790716,3_20790715,3_20790714,3_20790706,3_20790705,3_20790703,3_20790702,3_20790700,3_20790699,3_20790685	-	AT3G56020.1	249.2968272
AT3G55330	PPL1	5	3_20513962,3_20513938,3_20513933,3_20513932,3_20513916	-	AT3G55330.1	64.4059683
AT3G55170	RPL35C	2	3_20453046,3_20453045	-	AT3G55170.5,AT3G55170.4,AT3G55170.3,AT3G55170.2,AT3G55170.1	136.0058384,8.3371674,0
AT3G55040	GSTL2	3	3_20398601,3_20398600,3_20398580	-	AT3G55040.1	35.7440042
AT3G54890	LHCA1	20	3_20339687,3_20339680,3_20339676,3_20339674,3_20339671,3_20339670,3_20339669,3_20339668,3_20339667,3_20339666,3_20339660,3_20339659,3_20339651,3_20339646,3_20339645,3_20339643,3_20339642,3_20339624,3_20339610,3_20339607	-	AT3G54890.1,AT3G54890.4,AT3G54890.3,AT3G54890.2	3674.3385359,8.9820772,0.9847606,0.1012977
AT3G54880	AT3G54880	8	3_20337009,3_20337008,3_20336983,3_20336982,3_20336962,3_20336956,3_20336955,3_20336930	-	AT3G54880.1	63.2102777
AT3G54830	AT3G54830	2	3_20311822,3_20311821	-	AT3G54830.1,AT3G54830.2	7.1746257,0
AT3G54660	EMB2360	9	3_20230056,3_20230055,3_20230053,3_20229965,3_20229964,3_20229963,3_20229903,3_20229884,3_20229883	-	AT3G54660.1	73.2646281
AT3G54620	BZIP25	3	3_20218025,3_20218023,3_20218022	-	AT3G54620.1,AT3G54620.2,AT3G54620.3	59.2841316,2.0824248,0.3640458
AT3G54500	AT3G54500	2	3_20175506,3_20175477	-	AT3G54500.1,AT3G54500.4	21.2557218,0.9429628
AT3G54360	AT3G54360	6	3_20128423,3_20128422,3_20128376,3_20128375,3_20128374,3_20128369	-	AT3G54360.1	57.5927323
AT3G54210	RPL17	6	3_20067625,3_20067619,3_20067618,3_20067617,3_20067616,3_20067609	-	AT3G54210.1	376.4032762
AT3G53990	AT3G53990	4	3_19989537,3_19989536,3_19989532,3_19989531	-	AT3G53990.1,AT3G53990.2	187.6781381,0.808782
AT3G53890	RPS21B	19	3_19955530,3_19955529,3_19955528,3_19955456,3_19955451,3_19955450,3_19955449,3_19955448,3_19955447,3_19955446,3_19955445,3_19955444,3_19955438,3_19955437,3_19955436,3_19955435,3_19955434,3_19955433,3_19955432	-	AT3G53890.1,AT3G53890.2	612.5403198,9.4520781
AT3G53740	RPL36B	26	3_19913877,3_19913859,3_19913835,3_19913834,3_19913833,3_19913829,3_19913828,3_19913824,3_19913823,3_19913822,3_19913821,3_19913820,3_19913819,3_19913818,3_19913817,3_19913811,3_19913801,3_19913800,3_19913799,3_19913798,3_19913797,3_19913796,3_19913788,3_19913775,3_19913774,3_19913767	-	AT3G53740.2,AT3G53740.3,AT3G53740.4,AT3G53740.1	947.4702282,32.2002578,7.2736573,0.1573867
AT3G53500	RS2Z32	4	3_19834414,3_19834409,3_19834408,3_19834376	-	AT3G53500.2,AT3G53500.1,AT3G53500.3	85.3549938,11.6295134,3.0635223
AT3G53460	CP29A	4	3_19819351,3_19819350,3_19819349,3_19819335	-	AT3G53460.1,AT3G53460.4,AT3G53460.3	362.6278536,6.1780773,3.4577795
AT3G53430	RPL12B	17	3_19809914,3_19809871,3_19809849,3_19809815,3_19809813,3_19809811,3_19809809,3_19809804,3_19809803,3_19809799,3_19809798,3_19809785,3_19809784,3_19809783,3_19809750,3_19809749,3_19809744	-	AT3G53430.1	508.6629814
AT3G53020	RPL24B	15	3_19660676,3_19660643,3_19660642,3_19660638,3_19660637,3_19660636,3_19660629,3_19660628,3_19660627,3_19660626,3_19660624,3_19660614,3_19660613,3_19660612,3_19660593	-	AT3G53020.1	968.495165
AT3G52930	AT3G52930	17	3_19627402,3_19627320,3_19627315,3_19627310,3_19627309,3_19627247,3_19627235,3_19627229,3_19627228,3_19627227,3_19627220,3_19627218,3_19627217,3_19627216,3_19627215,3_19627214,3_19627213	-	AT3G52930.1	673.5378502
AT3G52880	ATMDAR1	14	3_19601407,3_19601393,3_19601392,3_19601390,3_19601389,3_19601388,3_19601387,3_19601386,3_19601360,3_19601359,3_19601354,3_19601332,3_19601280,3_19601275	-	AT3G52880.1,AT3G52880.2	312.9531148,0.0367306
AT3G52730	AT3G52730	12	3_19543133,3_19543132,3_19543078,3_19543066,3_19543047,3_19543046,3_19543023,3_19542983,3_19542982,3_19542981,3_19542980,3_19542979	-	AT3G52730.1,AT3G52730.2	276.7589797,0.5525242
AT3G52640	AT3G52640	2	3_19515020,3_19515019	-	AT3G52640.1,AT3G52640.3,AT3G52640.2	18.2937498,0.2731533,0.0694639
AT3G52560	UEV1D	4	3_19494576,3_19494523,3_19494490,3_19494489	-	AT3G52560.1,AT3G52560.2,AT3G52560.3,AT3G52560.4	103.0698726,40.5216784,0.9302556,0.2461665
AT3G52345	AT3G52345	3	3_19409403,3_19409382,3_19409381	-	AT3G52345.1	NA
AT3G52090	NRPB11	3	3_19317943,3_19317899,3_19317898	-	AT3G52090.1,AT3G52090.2	122.4805918,0.0404837
AT3G51920	CML9	4	3_19268141,3_19268132,3_19268131,3_19268068	-	AT3G51920.1	61.1441055
AT3G51880	HMGB1	4	3_19247216,3_19247166,3_19247165,3_19247096	-	AT3G51880.1,AT3G51880.2,AT3G51880.5,AT3G51880.3,AT3G51880.4	47.8199659,6.6199043,4.0567229,2.6678688,0.0835599
AT3G51840	ACX4	13	3_19225587,3_19225522,3_19225521,3_19225517,3_19225475,3_19225461,3_19225434,3_19225432,3_19225431,3_19225430,3_19225426,3_19225425,3_19225419	-	AT3G51840.1	115.7456117
AT3G51820	CHLG	12	3_19216199,3_19216196,3_19216186,3_19216185,3_19216157,3_19216156,3_19216137,3_19216136,3_19216134,3_19216133,3_19216132,3_19216128	-	AT3G51820.1	101.1439532
AT3G51800	EBP1	6	3_19211224,3_19211203,3_19211185,3_19211184,3_19211178,3_19211145	-	AT3G51800.1,AT3G51800.2	170.1656525,0.1368478
AT3G51610	AT3G51610	3	3_19139674,3_19139666,3_19139665	-	AT3G51610.1	41.8118803
AT3G51550	FER	3	3_19117746,3_19117678,3_19117672	-	AT3G51550.1	93.994259
AT3G51135	AT3G51135	1	3_18997716	-	AT3G51135.1	NA
AT3G50830	COR413PM2	3	3_18894002,3_18893961,3_18893927	-	AT3G50830.1	47.1931214
AT3G50820	PSBO2	12	3_18890988,3_18890987,3_18890986,3_18890985,3_18890984,3_18890983,3_18890978,3_18890977,3_18890976,3_18890975,3_18890960,3_18890935	-	AT3G50820.1	669.1132922
AT3G50500	SRK2D	3	3_18741612,3_18741611,3_18741597	-	AT3G50500.1,AT3G50500.2	70.3885139,0.5503337
AT3G49870	ATARLA1C	5	3_18492650,3_18492615,3_18492567,3_18492540,3_18492473	-	AT3G49870.1,AT3G49870.2	58.269496,0.0693096
AT3G49010	RPL13B	22	3_18166957,3_18166940,3_18166909,3_18166908,3_18166883,3_18166872,3_18166862,3_18166861,3_18166860,3_18166856,3_18166855,3_18166854,3_18166853,3_18166852,3_18166842,3_18166839,3_18166838,3_18166837,3_18166836,3_18166835,3_18166834,3_18166833	-	AT3G49010.2,AT3G49010.3,AT3G49010.4,AT3G49010.7,AT3G49010.6,AT3G49010.1,AT3G49010.5	1135.8605044,15.8188092,8.3477844,1.1197598,0.7640046,0.5170038,0.188256
AT3G48930	RPS11A	17	3_18140960,3_18140948,3_18140947,3_18140946,3_18140945,3_18140944,3_18140943,3_18140938,3_18140937,3_18140935,3_18140934,3_18140919,3_18140916,3_18140915,3_18140914,3_18140913,3_18140911	-	AT3G48930.1	1118.6831664
AT3G48870	CLPC2	3	3_18122323,3_18122322,3_18122266	-	AT3G48870.1,AT3G48870.2,AT3G48870.3,AT3G48870.4	93.055653,3.8446571,2.3815737,0.095298
AT3G48560	ALS	1	3_18001402	-	AT3G48560.1	224.5402826
AT3G48030	ATL48	1	3_17726823	-	AT3G48030.2	20.4047787
AT3G48000	ALDH2B4	5	3_17717081,3_17717031,3_17716981,3_17716941,3_17716940	-	AT3G48000.1	139.128413
AT3G47890	AT3G47890	1	3_17673675	-	AT3G47890.1,AT3G47890.2	5.9059089,1.3401717
AT3G47836	AT3G47836	14	3_17650376,3_17650341,3_17650340,3_17650339,3_17650338,3_17650337,3_17650336,3_17650314,3_17650313,3_17650312,3_17650310,3_17650303,3_17650302,3_17650301	-	AT3G47836.1,AT3G47836.2	119.3296451,0.5550304
AT3G47810	VPS29	12	3_17637222,3_17637221,3_17637220,3_17637196,3_17637171,3_17637170,3_17637169,3_17637168,3_17637167,3_17637165,3_17637164,3_17637163	-	AT3G47810.3,AT3G47810.1,AT3G47810.2	160.8881371,5.4975697,1.3029257
AT3G47470	LHCA4	17	3_17493511,3_17493510,3_17493509,3_17493506,3_17493504,3_17493503,3_17493499,3_17493495,3_17493494,3_17493491,3_17493490,3_17493485,3_17493484,3_17493474,3_17493467,3_17493466,3_17493465	-	AT3G47470.1	3431.5562634
AT3G47370	RPS20B	9	3_17453631,3_17453559,3_17453558,3_17453550,3_17453549,3_17453548,3_17453547,3_17453541,3_17453536	-	AT3G47370.1,AT3G47370.3,AT3G47370.2	368.7793355,1.215587,0.1696685
AT3G47070	AT3G47070	14	3_17337154,3_17337152,3_17337148,3_17337143,3_17337139,3_17337138,3_17337136,3_17337134,3_17337133,3_17337131,3_17337130,3_17337129,3_17337128,3_17337127	-	AT3G47070.1	110.600547
AT3G46010	ADF1	10	3_16909659,3_16909577,3_16909563,3_16909562,3_16909561,3_16909498,3_16909497,3_16909496,3_16909484,3_16909483	-	AT3G46010.1,AT3G46010.2	156.1074248,0.0727998
AT3G46000	ADF2	7	3_16907700,3_16907674,3_16907575,3_16907574,3_16907573,3_16907572,3_16907550	-	AT3G46000.1,AT3G46000.3,AT3G46000.2	98.8935164,0.7486957,0.0174778
AT3G45300	IVD	2	3_16621599,3_16621583	-	AT3G45300.1	62.9167129
AT3G45030	RPS20A	8	3_16471574,3_16471554,3_16471553,3_16471538,3_16471533,3_16471532,3_16471521,3_16471519	-	AT3G45030.1	320.1998454
AT3G44340	CEF	2	3_16011722,3_16011691	-	AT3G44340.1,AT3G44340.4,AT3G44340.3,AT3G44340.2,AT3G44340.5	18.56439,1.6025045,0.6826949,0.0131353,0
AT3G44280	AT3G44280	1	3_15968682	-	AT3G44280.1,AT3G44280.2	15.6941332,0.1449935
AT3G44110	ATJ3	17	3_15869036,3_15869009,3_15869007,3_15869006,3_15869005,3_15869001,3_15869000,3_15868999,3_15868998,3_15868997,3_15868967,3_15868966,3_15868965,3_15868962,3_15868855,3_15868854,3_15868853	-	AT3G44110.1,AT3G44110.2	235.0581962,0.0747632
AT3G44010	RPS29A	22	3_15800097,3_15800083,3_15800082,3_15800081,3_15800059,3_15800049,3_15800048,3_15800047,3_15800046,3_15800045,3_15800040,3_15800039,3_15800019,3_15800018,3_15800017,3_15800014,3_15799984,3_15799977,3_15799976,3_15799975,3_15799974,3_15799973	-	AT3G44010.2,AT3G44010.1	753.1227356,0.5133696
AT3G43980	RPS29A	5	3_15778457,3_15778450,3_15778412,3_15778411,3_15778357	-	AT3G43980.1	122.804404
AT3G43810	CAM7	11	3_15664642,3_15664548,3_15664547,3_15664457,3_15664456,3_15664455,3_15664450,3_15664449,3_15664448,3_15664447,3_15664438	-	AT3G43810.1,AT3G43810.3,AT3G43810.2,AT3G43810.4	228.6176962,0.57934,0.3016717,0.0856718
AT3G43720	LTPG2	6	3_15615544,3_15615472,3_15615460,3_15615452,3_15615443,3_15615432	-	AT3G43720.1,AT3G43720.2	102.6488666,19.4923312
AT3G43300	ATMIN7	3	3_15234156,3_15234136,3_15234135	-	AT3G43300.3,AT3G43300.2,AT3G43300.1	33.0109093,0.0354628,0.0250162
AT3G42050	VHA-H	13	3_14228778,3_14228751,3_14228749,3_14228727,3_14228725,3_14228722,3_14228686,3_14228685,3_14228684,3_14228624,3_14228623,3_14228616,3_14228595	-	AT3G42050.1	225.8646122
AT3G30390	AT3G30390	9	3_11977131,3_11977002,3_11977001,3_11976992,3_11976987,3_11976941,3_11976939,3_11976915,3_11976914	-	AT3G30390.1,AT3G30390.2,AT3G30390.3	303.8730716,68.1687903,7.8690489
AT3G29360	UGD2	6	3_11267229,3_11267228,3_11267227,3_11267226,3_11267225,3_11267206	-	AT3G29360.1,AT3G29360.2	71.9138751,50.0718281
AT3G29350	AHP2	2	3_11264209,3_11264208	-	AT3G29350.1	34.1894816
AT3G28940	AT3G28940	2	3_10968290,3_10968289	-	AT3G28940.1	119.8010576
AT3G28900	RPL34C	6	3_10902821,3_10902816,3_10902815,3_10902792,3_10902713,3_10902712	-	AT3G28900.1	110.4850229
AT3G28710	VHA-D1	16	3_10773061,3_10773050,3_10772978,3_10772977,3_10772976,3_10772971,3_10772970,3_10772969,3_10772968,3_10772967,3_10772959,3_10772935,3_10772934,3_10772933,3_10772932,3_10772931	-	AT3G28710.1	113.3673222
AT3G27890	NQR	1	3_10350743	-	AT3G27890.1	109.8252429
AT3G27770	AT3G27770	7	3_10285734,3_10285725,3_10285707,3_10285706,3_10285689,3_10285688,3_10285687	-	AT3G27770.1,AT3G27770.2	61.7226583,2.4291275
AT3G27740	CARA	2	3_10281371,3_10281350	-	AT3G27740.1,AT3G27740.2	74.3528408,0.0317028
AT3G27530	GC6	3	3_10193631,3_10193623,3_10193622	-	AT3G27530.1	20.794549
AT3G27380	SDH2-1	2	3_10131086,3_10131074	-	AT3G27380.2,AT3G27380.1	76.9861043,7.5489963
AT3G27240	CYC11	18	3_10056080,3_10056022,3_10056021,3_10055955,3_10055954,3_10055953,3_10055952,3_10055927,3_10055912,3_10055911,3_10055910,3_10055909,3_10055870,3_10055858,3_10055857,3_10055856,3_10055855,3_10055854	-	AT3G27240.1	206.0327795
AT3G26520	TIP1-2	3	3_9722643,3_9722561,3_9722560	-	AT3G26520.1	2006.3609566
AT3G25920	RPL15	11	3_9491216,3_9491198,3_9491178,3_9491158,3_9491157,3_9491153,3_9491150,3_9491142,3_9491128,3_9491121,3_9491120	-	AT3G25920.1	439.9934288
AT3G25800	PP2AA2	1	3_9422716	-	AT3G25800.1,AT3G25800.3,AT3G25800.2	43.5884777,1.3169537,0.0130927
AT3G25530	GLYR1	5	3_9271871,3_9271849,3_9271848,3_9271847,3_9271846	-	AT3G25530.1,AT3G25530.2,AT3G25530.3	72.9009313,20.4104919,6.3669823
AT3G25520	ATL5	19	3_9269531,3_9269509,3_9269508,3_9269476,3_9269475,3_9269464,3_9269463,3_9269462,3_9269461,3_9269460,3_9269453,3_9269452,3_9269451,3_9269444,3_9269443,3_9269440,3_9269439,3_9269438,3_9269437	-	AT3G25520.1,AT3G25520.3,AT3G25520.2	622.0848986,0.5292185,0.1666094
AT3G24430	HCF101	2	3_8868659,3_8868658	-	AT3G24430.1	43.4139069
AT3G24170	ATGR1	16	3_8729696,3_8729683,3_8729682,3_8729652,3_8729651,3_8729650,3_8729644,3_8729643,3_8729641,3_8729640,3_8729639,3_8729638,3_8729637,3_8729580,3_8729579,3_8729577	-	AT3G24170.3,AT3G24170.1,AT3G24170.2	142.0437216,53.3686826,13.1916332
AT3G23700	AT3G23700	3	3_8531671,3_8531545,3_8531544	-	AT3G23700.1	50.921654
AT3G23690	BHLH77	1	3_8528748	-	AT3G23690.1	22.0122023
AT3G23490	CYN	7	3_8423162,3_8423161,3_8423136,3_8423135,3_8423134,3_8423124,3_8423116	-	AT3G23490.1,AT3G23490.3	47.9793486,0.6323036
AT3G23400	PAP6	5	3_8376666,3_8376598,3_8376591,3_8376573,3_8376486	-	AT3G23400.1,AT3G23400.2,AT3G23400.4,AT3G23400.3	120.5218805,0.7217389,0.2979769,0.2909595
AT3G22320	NRPB5A	2	3_7891017,3_7890930	-	AT3G22320.1	72.4348728
AT3G22230	RPL27B	12	3_7844094,3_7844093,3_7844092,3_7844091,3_7844079,3_7844078,3_7844067,3_7844066,3_7844065,3_7844064,3_7844063,3_7844062	-	AT3G22230.1	450.6063924
AT3G22110	PAC1	3	3_7792724,3_7792723,3_7792722	-	AT3G22110.1	161.0430752
AT3G21865	PEX22	2	3_7701111,3_7701107	-	AT3G21865.1	50.3066019
AT3G21055	PSBT	25	3_7376706,3_7376705,3_7376704,3_7376703,3_7376702,3_7376701,3_7376700,3_7376697,3_7376696,3_7376695,3_7376694,3_7376689,3_7376688,3_7376686,3_7376685,3_7376684,3_7376683,3_7376682,3_7376681,3_7376677,3_7376676,3_7376675,3_7376663,3_7376662,3_7376661	-	AT3G21055.2,AT3G21055.1	1897.6625621,15.2176922
AT3G20920	AT3G20920	3	3_7328726,3_7328705,3_7328687	-	AT3G20920.1,AT3G20920.2	43.0666932,1.0873559
AT3G20800	AT3G20800	3	3_7271283,3_7271274,3_7271270	-	AT3G20800.1	26.785221
AT3G20390	RIDA	5	3_7110120,3_7110102,3_7109972,3_7109971,3_7109970	-	AT3G20390.1,AT3G20390.2	298.6615818,0.4696068
AT3G20290	EHD1	4	3_7074969,3_7074968,3_7074967,3_7074951	-	AT3G20290.2,AT3G20290.3,AT3G20290.1	20.1081863,1.7367875,0.7185689
AT3G19820	DIM	1	3_6879701	-	AT3G19820.2,AT3G19820.1,AT3G19820.3	330.1666092,4.5732468,1.5447448
AT3G19170	PREP1	2	3_6625474,3_6625448	-	AT3G19170.1,AT3G19170.2	64.1873434,7.2697918
AT3G18140	AT3G18140	2	3_6212694,3_6212661	-	AT3G18140.1,AT3G18140.2	40.1117254,0.4779832
AT3G17800	AT3G17800	3	3_6091257,3_6091208,3_6091191	-	AT3G17800.1,AT3G17800.2	67.2937222,0.0174621
AT3G17440	NPSN13	1	3_5969619	-	AT3G17440.1,AT3G17440.2	28.6755096,0
AT3G17020	AT3G17020	7	3_5802675,3_5802658,3_5802647,3_5802646,3_5802645,3_5802641,3_5802596	-	AT3G17020.1,AT3G17020.2	498.6376383,1.0940555
AT3G16690	SWEET16	1	3_5684397	-	AT3G16690.3,AT3G16690.1,AT3G16690.2	18.6487265,2.12235,0.2414415
AT3G16640	TCTP	51	3_5670817,3_5670816,3_5670815,3_5670814,3_5670813,3_5670812,3_5670811,3_5670810,3_5670772,3_5670771,3_5670770,3_5670769,3_5670768,3_5670739,3_5670738,3_5670726,3_5670097,3_5670080,3_5670025,3_5670024,3_5670007,3_5669953,3_5669952,3_5669951,3_5669950,3_5669949,3_5669948,3_5669947,3_5669647,3_5669645,3_5669639,3_5669630,3_5669615,3_5669606,3_5669575,3_5669574,3_5669573,3_5669568,3_5669558,3_5669556…	-	AT3G16640.1	1784.1177156
AT3G16190	AT3G16190	3	3_5489768,3_5489767,3_5489762	-	AT3G16190.1	47.7106959
AT3G16140	PSAH1	22	3_5468655,3_5468645,3_5468642,3_5468637,3_5468635,3_5468629,3_5468579,3_5468578,3_5468577,3_5468575,3_5468573,3_5468572,3_5468571,3_5468565,3_5468562,3_5468561,3_5468554,3_5468552,3_5468550,3_5468548,3_5468545,3_5468537	-	AT3G16140.1	334.5160663
AT3G15950	NAI2	2	3_5397679,3_5397638	-	AT3G15950.1,AT3G15950.5,AT3G15950.4,AT3G15950.2,AT3G15950.3	220.2723162,2.9729604,0.9496443,0.7464815,0.0112966
AT3G15840	PIFI	2	3_5356742,3_5356731	-	AT3G15840.1,AT3G15840.3,AT3G15840.2,AT3G15840.4,AT3G15840.5	58.6826982,0.727677,0.4831497,0.3857917,0.1000322
AT3G15660	GRXS15	6	3_5308064,3_5308059,3_5308058,3_5308056,3_5308055,3_5308013	-	AT3G15660.1,AT3G15660.2	39.1986196,17.8255884
AT3G15580	ATG8I	7	3_5274042,3_5274034,3_5274033,3_5274032,3_5274031,3_5274030,3_5274021	-	AT3G15580.1	71.6001514
AT3G14350	SRF7	3	3_4782894,3_4782880,3_4782879	-	AT3G14350.1,AT3G14350.2,AT3G14350.3	31.4304092,0.1717663,0.0342154
AT3G13920	TIF4A-1	11	3_4592489,3_4592488,3_4592487,3_4592477,3_4592476,3_4592475,3_4592449,3_4592438,3_4592428,3_4592427,3_4592426	-	AT3G13920.1,AT3G13920.3,AT3G13920.2,AT3G13920.5	401.577666,0.3549617,0.2311294,0.2160137
AT3G13870	RHD3	4	3_4565625,3_4565571,3_4565493,3_4565472	-	AT3G13870.1,AT3G13870.2	65.4941682,0.0260778
AT3G13570	SCL30A	1	3_4429430	-	AT3G13570.1	53.4623791
AT3G13460	ECT2	25	3_4385089,3_4385064,3_4385063,3_4385009,3_4385008,3_4385007,3_4385006,3_4385005,3_4385004,3_4385003,3_4385002,3_4385001,3_4384984,3_4384982,3_4384978,3_4384977,3_4384976,3_4384975,3_4384974,3_4384971,3_4384931,3_4384852,3_4384851,3_4384850,3_4384787	-	AT3G13460.1,AT3G13460.4,AT3G13460.2,AT3G13460.3	133.8540841,51.0720956,3.9623854,0.0725596
AT3G13410	AT3G13410	15	3_4362077,3_4362062,3_4362061,3_4362060,3_4362050,3_4362041,3_4361990,3_4361986,3_4361985,3_4361984,3_4361983,3_4361966,3_4361965,3_4361951,3_4361950	-	AT3G13410.1	152.9031963
AT3G13120	RPS10	3	3_4220015,3_4219933,3_4219930	-	AT3G13120.1,AT3G13120.2	92.9821155,13.2521065
AT3G13040	AT3G13040	4	3_4172347,3_4172308,3_4172307,3_4172301	-	AT3G13040.3,AT3G13040.1,AT3G13040.2	17.0787175,11.5757606,0.4484551
AT3G12965	AT3G12965	14	3_4137147,3_4137124,3_4137123,3_4137121,3_4137120,3_4137119,3_4137077,3_4137076,3_4137075,3_4137074,3_4137073,3_4137072,3_4137060,3_4137044	-	AT3G12965.1	NA
[truncated: 969 more rows]

## Sheet: PEAKS 55kDa
ID	STRAND	REF	SCORE	BINDING SITE	GENE ID	GENE NAME	TRANSCRIPTS	LOCATION	LOCATION_PROP	TRANSCRIPTS TPM (ECT2 HT CTLs)
[truncated: 4,549 more rows]

[truncated: 5 more sheets: GENES 55kDa, PEAKS W464A-110kDa, GENES W464A-110kDa, PEAKS W464A-55kDa, GENES W464A-55kDa]
